# Supplementary material for: Functional Analysis and Fine Mapping of the 9p22.2 Ovarian Cancer Susceptibility Locus
Source: Oxford University Press journal article supplement (doi:10.1158/0008-5472.can-17-3864), 2018-11-28
Supplement: 00085472can173864-sup-194003_3_supp_4928072_pcp4jb.xlsx [file 00085472can173864-sup-194003_3_supp_4928072_pcp4jb.xlsx]

## Sheet: Supplementary Table 3
Chromosome	start	end	SNP	LD (r2) to rs3814113
chr9	16914834	16914835	rs10810671	1
chr9	16915020	16915021	rs3814113	1
chr9	16914894	16914895	rs7032221	1
chr9	16910676	16910677	rs10738467	0.974
chr9	16910762	16910763	rs10738468	0.974
chr9	16912987	16912988	rs4246134	0.974
chr9	16911637	16911638	rs4366169	0.974
chr9	16911756	16911757	rs4445329	0.974
chr9	16913042	16913043	rs4465052	0.974
chr9	16913285	16913286	rs4631563	0.974
chr9	16913472	16913473	rs6475092	0.974
chr9	16913513	16913514	rs6475093	0.974
chr9	16913615	16913616	rs6475094	0.974
chr9	16910897	16910898	rs7045767	0.974
chr9	16909050	16909051	rs7866677	0.949
chr9	16914702	16914703	rs7048397	0.948
chr9	16916692	16916693	rs10962693	0.922
chr9	16908168	16908169	rs55689948	0.922
chr9	16907583	16907584	rs113780397	0.818
chr9	16911664	16911665	rs10465044	0.719
chr9	16857402	16857403	rs10962643	0.719
chr9	16905440	16905441	rs10962679	0.681
chr9	16909109	16909110	rs7851204	0.672
chr9	16891646	16891647	rs10124837	0.638
chr9	16889936	16889937	rs10962662	0.638
chr9	16911399	16911400	rs10810665	0.626
chr9	16911665	16911666	rs10810666	0.626
chr9	16912434	16912435	rs10810668	0.626
chr9	16912660	16912661	rs10810669	0.626
chr9	16912662	16912663	rs10810670	0.626
chr9	16915104	16915105	rs10962691	0.626
chr9	16913556	16913557	rs12377389	0.626
chr9	16913767	16913768	rs12377421	0.626
chr9	16910213	16910214	rs62543587	0.626
chr9	16913835	16913836	rs74664507	0.622
chr9	16858083	16858084	rs10756819	0.611
chr9	16878615	16878616	rs10756823	0.61
chr9	16878492	16878493	rs10122763	0.607
chr9	16876282	16876283	rs10810652	0.607
chr9	16877137	16877138	rs10810655	0.607
chr9	16894139	16894140	rs10962668	0.607
chr9	16881876	16881877	rs12345776	0.607
chr9	16887365	16887366	rs3927680	0.607
chr9	16882915	16882916	rs4644350	0.607
chr9	16881372	16881373	rs7040151	0.607
chr9	16915873	16915874	rs10962692	0.606
chr9	16909001	16909002	rs12376998	0.596
chr9	16873550	16873551	rs10810650	0.589
chr9	16874611	16874612	rs10962650	0.589
chr9	16900694	16900695	rs28498684	0.589
chr9	16900764	16900765	rs36116821	0.589
chr9	16863363	16863364	rs62541919	0.589
chr9	16891560	16891561	rs10962664	0.586
chr9	16891589	16891590	rs10962665	0.586
chr9	16892271	16892272	rs10962666	0.586
chr9	16914715	16914716	rs62543619	0.586
chr9	16856882	16856883	rs1416742	0.572
chr9	16914577	16914578	rs62543618	0.566
chr9	16898118	16898119	rs10962672	0.563
chr9	16896587	16896588	rs10962670	0.555
chr9	16848789	16848790	rs1339552	0.555
chr9	16903361	16903362	rs34606230	0.555
chr9	16899284	16899285	rs62543561	0.555
chr9	16904634	16904635	rs62543578	0.555
chr9	16905169	16905170	rs62543579	0.555
chr9	16906005	16906006	rs62543581	0.555
chr9	16906093	16906094	rs62543582	0.555
chr9	16906151	16906152	rs62543583	0.555
chr9	16906306	16906307	rs62543584	0.555
chr9	16906888	16906889	rs62543585	0.555
chr9	16906509	16906510	rs72713890	0.555
chr9	16853778	16853779	rs10810647	0.541
chr9	16851677	16851678	rs4961501	0.541
chr9	16847519	16847520	rs7046326	0.541
chr9	16851976	16851977	rs7868157	0.541
chr9	16864520	16864521	rs2153271	0.539
chr9	16884585	16884586	rs10810657	0.528
chr9	16907645	16907646	rs181552334	0.527
chr9	16908382	16908383	rs80039758	0.516
chr9	16885016	16885017	rs12350739	0.508
chr9	16901227	16901228	rs13300853	0.501
chr9	16881255	16881256	rs7025549	0.481
chr9	16901066	16901067	rs62543565	0.475
chr9	16903365	16903366	rs10738466	0.451
chr9	16865698	16865699	rs12379183	0.445
chr9	16907966	16907967	rs117224476	0.44
chr9	16862279	16862280	rs7861573	0.426
chr9	16904947	16904948	rs10756835	0.425
chr9	16905327	16905328	rs12344726	0.425
chr9	16903947	16903948	rs7029285	0.425
chr9	16904079	16904080	rs7032175	0.425
chr9	16904201	16904202	rs7032420	0.425
chr9	16904354	16904355	rs7032581	0.425
chr9	16904140	16904141	rs7032644	0.425
chr9	16904302	16904303	rs58691828	0.425
chr9	16904495	16904496	rs7033061	0.425
chr9	16904640	16904641	rs7033084	0.425
chr9	16904704	16904705	rs7033194	0.425
chr9	16904845	16904846	rs7033354	0.425
chr9	16906358	16906359	rs7868583	0.425
chr9	16907996	16907997	rs77795022	0.422
chr9	16846259	16846260	rs1339547	0.391
chr9	16846322	16846323	rs1339548	0.391
chr9	16907674	16907675	rs76718132	0.379
chr9	16903849	16903850	rs10810661	0.37
chr9	16849603	16849604	rs10962641	0.37
chr9	16845725	16845726	rs10810645	0.346
chr9	16843012	16843013	rs4961498	0.336
chr9	16870181	16870182	rs62541922	0.317
chr9	16895577	16895578	rs12551733	0.301
chr9	16902523	16902524	rs4961503	0.301
chr9	16907620	16907621	rs9697099	0.301
chr9	16846110	16846111	rs10962638	0.3
chr9	16863542	16863543	rs10962645	0.3
chr9	16868379	16868380	rs10962647	0.3
chr9	16868957	16868958	rs10962648	0.3
chr9	16873534	16873535	rs10962649	0.3
chr9	16874877	16874878	rs10962652	0.3
chr9	16876735	16876736	rs10962653	0.3
chr9	16877787	16877788	rs10962656	0.3
chr9	16881345	16881346	rs10962658	0.3
chr9	16883317	16883318	rs10962659	0.3
chr9	16858568	16858569	rs11788047	0.3
chr9	16872322	16872323	rs11789875	0.3
chr9	16864075	16864076	rs11792249	0.3
chr9	16889022	16889023	rs12376099	0.3
chr9	16854366	16854367	rs12379687	0.3
chr9	16852452	16852453	rs62541877	0.3
chr9	16861204	16861205	rs62541878	0.3
chr9	16861507	16861508	rs62541879	0.3
chr9	16865290	16865291	rs62541920	0.3
chr9	16870500	16870501	rs62541923	0.3
chr9	16877422	16877423	rs62541926	0.3
chr9	16885463	16885464	rs77507622	0.3
