# Supplementary material for: Functional Analysis and Fine Mapping of the 9p22.2 Ovarian Cancer Susceptibility Locus
Source: Oxford University Press journal article supplement (doi:10.1158/0008-5472.can-17-3864), 2018-11-28
Supplement: 00085472can173864-sup-194003_3_supp_4928073_pcp4jb.xlsx [file 00085472can173864-sup-194003_3_supp_4928073_pcp4jb.xlsx]

## Sheet: 1. Nanostring gene SET
Gene Symbol	Pathway	Cell Line	P-Value
LMO7	Adherens Junction	FTE	0.158204
SNAI2	Adherens Junction	FTE	0.0617818
WASL	Adherens Junction	FTE, OSE	0.357764
TGFBR2	Adherens Junction, TGF-beta Signaling Pathway, MAPK Signaling Pathway	FTE	0.76959
SMAD3	Adherens Junction, TGF-beta Signaling Pathway, WNT Signaling Pathway	FTE, OSE	0.397447
CD36	ECM-receptor interaction	FTE	0.278829
COL4A5	ECM-receptor interaction, Focal Adhesion	FTE	0.0174824
COL4A6	ECM-receptor interaction, Focal Adhesion	FTE	0.498149
COL6A3	ECM-receptor interaction, Focal Adhesion	FTE	0.00698256
FN1	ECM-receptor interaction, Focal Adhesion	FTE	0.0638777
ITGB5	ECM-receptor interaction, Focal Adhesion	FTE	0.000463581
LAMB1	ECM-receptor interaction, Focal Adhesion	FTE	0.253691
THBS1	ECM-receptor interaction, Focal Adhesion, TGF-beta Signaling Pathway	FTE, OSE	0.272864
CAPN2	Focal adhesion	FTE	0.00942743
ITGA3	Focal Adhesion	OSE	0.00711417
ITGA5	Focal Adhesion	OSE	0.317146
MYLK	Focal adhesion	FTE	0.175669
PDGFC	Focal adhesion	FTE	0.474245
ACTG1	Focal Adhesion, Adherens Junction	OSE	0.114003
ACTN4	Focal Adhesion, Adherens Junction	OSE	0.215077
CCND3	Focal adhesion, WNT Signaling Pathway, JAK-STAT Signaling Pathway	FTE	0.00106617
JUN	Focal adhesion, WNT Signaling Pathway, MAPK Signaling Pathway	FTE, OSE	0.00626649
PRKCA	Focal adhesion, WNT Signaling Pathway, MAPK Signaling Pathway	FTE	0.661409
CTGF	Follicular Development	FTE, OSE	0.40642
LSM5	Follicular Development	FTE	0.108182
SPARC	Follicular Development	FTE	0.449072
HNF1B	GWAS	FTE	0.147319
BCL2L1	JAK-STAT Signaling Pathway	FTE	0.731641
IFNGR1	JAK-STAT Signaling Pathway	FTE	0.582081
IL22	JAK-STAT Signaling Pathway	FTE	0.579743
IL22RA2	JAK-STAT Signaling Pathway	FTE, OSE	0.586641
LEP	JAK-STAT Signaling Pathway	FTE	0.140784
LEPR	JAK-STAT Signaling Pathway	FTE	0.178337
CACNG6	MAPK Signaling Pathway	OSE	0.519174
DUSP1	MAPK Signaling Pathway	OSE	0.361961
DUSP10	MAPK Signaling Pathway	FTE, OSE	0.67452
DUSP3	MAPK Signaling Pathway	FTE	0.64444
FASLG	MAPK Signaling Pathway	FTE	0.0710435
GADD45B	MAPK Signaling Pathway	OSE	0.89367
GNA12	MAPK Signaling Pathway	OSE	0.70082
MAP3K8	MAPK Signaling Pathway	FTE	0.097609
RASGRF2	MAPK Signaling Pathway	OSE	0.351677
RASGRP1	MAPK Signaling Pathway	FTE	0.337027
RASGRP3	MAPK Signaling Pathway	FTE, OSE	0.349038
RPS6KA2	MAPK Signaling Pathway	FTE	0.663797
FAM49B	Ovarian Cancer	FTE	0.000147821
FAP	Ovarian Cancer	FTE	0.337081
ANK3	Ovarian Development	FTE	0.131767
CEP55	Ovarian Development	FTE	0.00264458
PKDCC	Ovarian Development	FTE	0.000662221
PLOD2	Ovarian Development	FTE	0.859238
SEMA3C	Ovarian Development	OSE	0.909909
SH2D4A	Ovarian Development	FTE, OSE	0.0853865
SPHK1	Ovarian Development	OSE	0.306764
TRIB2	Ovarian Development	FTE	0.431418
UHRF1BP1L	Ovarian Development	FTE	0.547335
CD44	Ovarian Development, ECM-receptor interaction	FTE	0.594199
AP2S1	Promoter with Peak	OSE	0.745061
BANP	Promoter with Peak	OSE	0.0800971
BTBD19	Promoter with Peak	OSE	0.252734
CCDC80	Promoter with Peak	FTE	0.393617
CD59	Promoter with Peak	FTE	0.120419
CLPB	Promoter with Peak	OSE	0.493307
FBXO15	Promoter with Peak	OSE	0.01375
FEM1A	Promoter with Peak	OSE	0.0206431
FSCN1	Promoter with Peak	OSE	0.239258
GBA	Promoter with Peak	OSE	0.116495
ITGB2	promoter with Peak	OSE	0.837322
KBTBD6	Promoter with Peak	OSE	0.216789
PDCD1LG2	Promoter with Peak	FTE	0.376884
PHF12	Promoter with Peak	OSE	0.897434
POLDIP3	Promoter with Peak	OSE	0.117417
PPP6R3	Promoter with Peak	OSE	0.116575
RAI14	Promoter with Peak	FTE	0.633566
RANBP10	Promoter with Peak	OSE	0.0754672
SLFN12	Promoter with Peak	FTE	0.0101215
TCTEX1D4	Promoter with Peak	OSE	0.262288
THOC6	Promoter with Peak	ose	0.132422
TSNAXIP1	Promoter with Peak	OSE	0.715911
ZBTB4	Promoter with Peak	OSE	0.897263
BMP6	TGF-beta Signaling Pathway	FTE	0.0532369
ID1	TGF-beta Signaling Pathway	OSE	0.107984
LTBP1	TGF-beta Signaling Pathway	FTE	0.56817
TGFBR3	TGF-beta Signaling Pathway	FTE	0.0390608
SMAD7	TGF-beta Signaling Pathway, Promoter with Peak	FTE, OSE	0.852642
DKK1	WNT Signaling Pathway	FTE	0.161139
PPP3CA	WNT Signaling Pathway, MAPK Signaling Pathway	FTE	0.0636258
ACTB	Reference		0.173391
EIF2C1	Reference		0.297106
GIGYF2	Reference		0.877403
GUSB	Reference		0.00527919
INO80	Reference		0.083297
PRDM4	Reference		0.395291
SMG5	Reference		0.0546939
STK35	Reference		0.0450957
TOX4	Reference		0.091678
TTI2	Reference		0.0296113

## Sheet: 2. 995 gene list
AAGAB
AAK1
ABCA10
ABCF1
ABHD4
ABHD5
ABLIM3
ABTB2
ACO1
ACOX2
ACSL1
ACSS1
ACTB
ACTG1
ADAMTS6
ADAMTSL1
ADRA1B
AFAP1
AFF3
AGTPBP1
AKAP2
AKNA
ALK
ALOX5AP
ALS2
AMIGO2
AMOTL2
ANGPT1
ANKRD1
ANKRD28
ANKRD33B
ANKRD34A
ANKRD55
ANTXR1
ANXA2
ANXA3
ANXA6
AOAH
AOX1
AOX2P
AP1AR
AP1S1
APCS
APOA1
APOA4
APOA5
APOBEC4
APOC3
ARHGAP18
ARHGAP22
ARHGAP31
ARHGAP35
ARID1B
ARL14
ARL15
ARMS2
ARNT
ARPC5
ARSG
ART4
ASAP1
ASAP2
ASB9P1
ATAT1
ATIC
ATN1
ATP10D
ATP5L2
ATP6V1A
ATP8B1
ATP9A
ATXN10
ATXN7
BAX
BCAP29
BCAR3
BCKDHB
BCL2L1
BDH1
BEST1
BFSP2
BIRC2
BIRC3
BLK
BMPER
BOD1
BPI
BTBD19
C10ORF11
C10ORF90
C11ORF54
C12ORF45
C12ORF57
C12ORF60
C14ORF166
C15ORF54
C17ORF105
C17ORF47
C17ORF59
C18ORF63
C19ORF33
C1ORF168
C1ORF228
C1QTNF7
C4ORF32
C6ORF136
C7ORF10
C8A
C9ORF84
CAB39
CABIN1
CACNG6
CACNG8
CALM2
CAMK2D
CAMTA1
CAPZA3
CBX5
CC2D2A
CCDC132
CCDC68
CCDC80
CCDC93
CCL20
CCND3
CCNYL1
CD109
CD44
CDA
CDCA3
CDH17
CDK11A
CDK11B
CDK15
CDK5RAP2
CDKN2B-AS1
CDR2
CEP55
CERS5
CETP
CFL2
CHCHD6
CHD6
CHN2
CHST11
CLASP1
CLIP1
CLMN
CLMP
CMTM6
CMTM7
CNGB1
CNKSR3
CNOT3
CNTN5
COBL
COL21A1
COL5A2
COLEC12
COPS2
COX11
CPA1
CPA5
CPEB2
CPNE4
CPQ
CRIM1
CRISPLD2
CROCC
CROCCP3
CSGALNACT1
CTDSPL
CTGF
CTHRC1
CTNNAL1
CTSH
CTTNBP2NL
CXCL1
CXCL6
CYB5A
CYB5R3
CYP27A1
CYR61
CYSTM1
DAD1
DCAF4
DCBLD1
DCN
DDAH1
DDC
DDIT4
DDR2
DDX11L1
DDX31
DENND5B
DHDH
DHX16
DIEXF
DISC1
DISC2
DKK1
DLC1
DLGAP1
DNAJB4
DNAJC1
DNAJC15
DNAJC3
DNAJC5B
DNER
DNM3
DUS2L
DUS4L
DUSP1
DUSP10
DUSP23
DUSP3
DYNC1I2
DYSF
E2F2
ECE1
EDIL3
EEA1
EEF1A1
EEF1E1
EFEMP1
EFNA5
EGFR
EHF
EIF3H
EIF4A2
EIF4G3
EIF5A2
EMG1
EML1
ENO1
ENO1-AS1
ENO2
ENOPH1
ENY2
EPG5
EPSTI1
ERC1
ERC2
ERCC1
ERCC6
EREG
ERGIC1
ERN1
ETNK2
ETV6
EXOC6
EXT1
EYS
F2R
F2RL1
FAM107A
FAM129A
FAM129B
FAM171A1
FAM188B
FAM49B
FAM71D
FAM83C
FAM91A1
FAM92A1
FBXL13
FBXL18
FBXO42
FCHSD2
FEM1A
FER1L6
FGF14
FGF14-IT1
FGF7
FHL2
FIGN
FLI1
FLJ22447
FLNB
FMN1
FN1
FOLR3
FOSB
FOXE1
FOXJ3
FRAS1
FRMD4A
FRMD6
FRMD8
FSCN2
FSIP1
FTH1
FTL
FTO
FUBP1
FZD1
FZD6
GABBR2
GALK2
GALNT2
GAPDH
GEM
GGT5
GIPC2
GMEB1
GNA14
GNAQ
GNB3
GOLT1A
GPR162
GPR87
GPR98
GRAMD1C
GREM1
GRIK1
GRIK1-AS2
GSTO2
GTF2F2
GTF3C4
GYG1
GYS1
HCAR2
HDGF
HECW1
HEG1
HERC3
HERPUD1
HFE2
HHAT
HIF1A
HIF1A-AS2
HIPK2
HIST1H1D
HIST1H2AD
HIST1H2AE
HIST1H2BE
HIST1H2BF
HIST1H2BG
HIST1H3D
HIST1H3E
HIST1H4D
HIST1H4E
HIVEP3
HLTF
HMBOX1
HMCN1
HNMT
HNRPDL
HORMAD2
HTRA1
ID3
IFFO1
IFNGR1
IGDCC3
IGF1R
IGF2BP2
IGFBP4
IGFBP7
IL12RB1
IL16
IL1RAP
IL22
IL22RA2
ILDR2
INMT-FAM188B
INPP4B
INTS9
IPP
IQGAP2
ITGB1
ITGB3
ITGB5
ITGBL1
ITPRIP
JAK1
JAKMIP2
JAZF1
JUN
KBTBD6
KCNJ15
KCNK15
KCNK2
KCTD4
KDM1A
KIAA0146
KIAA0564
KIAA1731
KIAA1755
KIAA2013
KIF25
KIF27
KIF2C
KISS1
KLF6
KLHL38
KRCC1
KRT18P55
KRT31
KRT34
KRT37
KRT81
KRT86
KRTAP1-1
KRTAP1-3
KRTAP2-1
KRTAP2-2
KRTAP2-4
KRTAP4-7
KSR1
LACTB
LACTB2
LAMA2
LAMA4
LAMP3
LDHA
LDHC
LEP
LEPREL2
LGMN
LIMA1
LIMS1
LINC00309
LINC00460
LINC00474
LINC00476
LINC00477
LINC00535
LINC00536
LIPC
LMO7
LOC100129316
LOC100130992
LOC100131496
LOC100132062
LOC100132287
LOC100133331
LOC100288911
LOC100289650
LOC100505478
LOC100505782
LOC100505795
LOC100506178
LOC100506801
LOC100506895
LOC100507140
LOC152225
LOC339529
LOC400684
LOC440028
LOC643542
LOC646736
LOC728392
LPAR1
LPIN3
LPP
LRIT1
LRRC23
LRRC8D
LRRFIP2
LSAMP
LSM10
LSM14A
LTBP2
LUM
LURAP1L
LUZP1
MACC1
MAGI2
MAGOHB
MALAT1
MAPKAP1
MBP
MCFD2
MCU
MDC1
MDM1
ME1
ME3
MECOM
MED12L
MED13L
MFAP5
MFF
MGAT4C
MICAL2
MIR100
MIR100HG
MIR1208
MIR1244-1
MIR1244-2
MIR1244-3
MIR1248
MIR1252
MIR129-1
MIR1304
MIR141
MIR181A2HG
MIR200C
MIR21
MIR216A
MIR216B
MIR217
MIR29A
MIR29B1
MIR3124
MIR3134
MIR3198-2
MIR32
MIR3658
MIR378D2
MIR4266
MIR4315-1
MIR4315-2
MIR4435-1
MIR4435-2
MIR4444-1
MIR4472-2
MIR4486
MIR4521
MIR4653
MIR4660
MIR4788
MIR548AC
MIR548H3
MIR548M
MIR589
MIR612
MIR620
MIR7-3
MIR7-3HG
MIR935
MIRLET7A2
MIS12
MITF
MKLN1
MLPH
MMD
MME
MMP23A
MOK
MORF4L1
MPP3
MPP5
MRPL24
MRPL33
MRPS18B
MRVI1
MT1A
MT1E
MT1JP
MT1L
MT1M
MT2A
MT3
MTHFD1L
MTMR2
MTMR4
MTO1
MUC13
MUSK
MUTED
MYC
MYOF
MYOZ3
MYPN
NARG2
NAT16
NAV1
NAV2
NBPF10
NBPF14
NBPF15
NBPF16
NBR1
NCAPD2
NCRUPAR
NDRG1
NDST3
NDUFA3
NEAT1
NEBL
NEK6
NFATC3
NHEJ1
NID2
NLRP1
NNMT
NOP2
NPAS2
NR6A1
NRCAM
NREP
NRG1
NRM
NRP1
NRXN3
NSMCE2
NT5E
NTM
NUAK2
NUDCD1
NUDCD3
NXN
OR4F16
OR4F29
OR4F3
OR51B5
OR51B6
OR51M1
OR8D1
OR8G1
OR8G5
OSCAR
P2RX6
P2RX6P
P2RY13
P2RY14
PADI2
PAG1
PALLD
PALM2-AKAP2
PANK1
PARP16
PBX1
PC
PCDH9
PCNXL2
PDCD1LG2
PDE4DIP
PDGFC
PDLIM1
PDP1
PER1
PERP
PF4V1
PFDN1
PGBD3
PHACTR4
PHB2
PHF12
PHLDB2
PIK3C2A
PIK3C2G
PINK1
PKHD1L1
PKIG
PLA2G1B
PLCXD2
PLCZ1
PLK3
PLOD1
PLOD2
PLSCR4
PLXNA2
PNPLA3
PNPLA5
POC1B
POLDIP3
POLR3GL
POM121L10P
PPFIBP1
PPIAL4A
PPIAL4C
PPIAL4D
PPIAL4F
PPM1H
PPP1R10
PPP1R12B
PPP1R14A
PPP1R18
PRCC
PRKAG3
PRKCE
PRKCH
PRKG1
PRLR
PRPF31
PRPSAP1
PRR16
PRSS12
PRSS21
PRSS22
PRSS30P
PRTFDC1
PSD3
PSG1
PSG10P
PSMD1
PTCH2
PTPN1
PTPN14
PTPN2
PTPN6
PTPRC
PTPRR
PVT1
PXN
PYGL
RAB8B
RAD51C
RAI14
RAPGEF4
RAPGEF6
RASA2
RASAL2
RASGRP3
RBKS
RBMS3
RBPJ
RCC1
RECK
REN
RERE
RFC4
RFC5
RGL1
RGR
RGS7
RIMKLB
RNF5P1
RNU11
RNU12
RNU4ATAC
ROR1
ROS1
RPL27A
RPLP0
RPP30
RPRD1B
RPS14
RPS6KA2
RPTN
RRN3P3
RSPO3
RTTN
RUNX1
RUNX1T1
RUNX2
RUSC2
RUVBL2
RXFP2
S100Z
SAMSN1
SATB2
SBF2
SCARNA10
SCARNA12
SCARNA27
SCARNA9
SCFD2
SCYL1
SDC4
SEC14L1
SEC22B
SEMA3C
SEMA3D
SERPINB2
SERPINE1
SERTAD4
SEZ6
SFTA1P
SGIP1
SH2D4A
SH2D7
SH3BP4
SH3BP5L
SH3KBP1
SH3RF3
SH3TC2
SHB
SHC3
SIK2
SIK3
SIPA1L3
SIRT4
SLA
SLC10A7
SLC12A8
SLC16A12
SLC2A1
SLC35D1
SLC35E2B
SLC38A1
SLC38A2
SLC39A10
SLC39A11
SLC3A2
SLC7A4
SLC9A9
SLED1
SMAD3
SMAD7
SNAI2
SNAP25
SNAPC1
SNAR-A10
SNAR-A11
SNAR-A14
SNAR-A3
SNAR-A4
SNAR-A5
SNAR-A6
SNAR-A7
SNAR-A8
SNAR-A9
SNHG1
SNHG3
SNHG8
SNORA1
SNORA18
SNORA24
SNORA25
SNORA32
SNORA4
SNORA40
SNORA59A
SNORA59B
SNORA63
SNORA8
SNORA81
SNORD104
SNORD121A
SNORD121B
SNORD2
SNORD22
SNORD25
SNORD26
SNORD27
SNORD28
SNORD29
SNORD30
SNORD31
SNORD5
SNORD6
SNRPE
SNTG1
SOCS3
SORBS1
SORBS2
SORCS2
SOST
SPARC
SPATA21
SPEF2
SPHK1
SPINT2
SPSB2
SPTBN1
SRGAP1
SRGN
SSH1
ST3GAL2
ST3GAL3
ST5
STARD5
STIM1
STK40
STON2
STX5
STXBP1
STXBP4
STYK1
SUCNR1
SUMO1P1
SUSD1
SUSD2
SVEP1
SVIL
SWAP70
SYN2
SYNPO
SYS1
SYS1-DBNDD2
SYT1
SYT2
TAF12
TAF1D
TBC1D2
TBC1D2B
TBC1D3P5
TBC1D4
TBC1D5
TCTEX1D4
TEC
TEX14
TEX2
TFPT
TG
TGFBR3
TGM2
THAP7-AS1
THBS1
THSD4
TIAM2
TICAM1
TM4SF20
TMC3
TMCC2
TMEM106A
TMEM107
TMEM108
TMEM155
TMEM170B
TMEM245
TMEM44
TMEM69
TMSB4X
TMTC1
TNFRSF11B
TNIP1
TNS3
TNS4
TOM1L1
TP53TG5
TPBG
TPI1
TPM1
TPST1
TPX2
TRAM1
TRAM2
TRHR
TRIM2
TRIM55
TRIM67
TRIM9
TRIO
TRPC4AP
TRPM3
TRPM6
TRPM8
TSEN15
TSNAX-DISC1
TTC28
TTC7A
TTL
TUBB
TUBD1
TXK
TXNDC16
TXNIP
UBAP2
UBC
UBE2E2
UBE2O
UBE2R2
UCHL3
UCK2
ULK4P3
UQCC
USP5
UST
VAMP2
VAT1L
VDAC1
VEPH1
VGF
VIM
VMP1
VOPP1
VPS53
VSIG10
VSTM1
VTI1A
WASL
WDR59
WDR65
WDR70
WDR74
WISP1
WISP2
WSB2
WWC3
YEATS2
YIF1B
ZBTB16
ZBTB20
ZBTB38
ZC3H15
ZFHX3
ZFP36L1
ZFYVE1
ZFYVE28
ZG16B
ZHX3
ZMYND8
ZNF280D
ZNF281
ZNF30
ZNF365
ZNF507
ZNF672
ZNF692
ZNF792
ZNRF1

## Sheet: 3. FTE1
chr	start	end	length	abs_summit	pileup	-lg10(pvalue)	fold_enrichment	-lg10(qvalue)	name	coordinate	thislocation	upsteam	dnstream
chr1	1617698	1617853	156	1617799	24.38	14.1212	6.15307	9.90909	FTE1_peak_1	chr1_1617698_1617853	CDK11B;MMP23A;SLC35E2B	.	CDK11A
chr1	7361189	7361335	147	7361278	18.13	13.1878	6.95628	9.0676	FTE1_peak_2	chr1_7361189_7361335	CAMTA1	.	.
chr1	8064535	8064764	230	8064747	13.75	7.87524	5.13169	4.30678	FTE1_peak_3	chr1_8064535_8064764	.	PARK7	ERRFI1
chr1	8066651	8066789	139	8066728	15	10.0567	5.76719	6.26179	FTE1_peak_4	chr1_8066651_8066789	.	PARK7	ERRFI1
chr1	8066903	8067034	132	8067005	16.25	11.5799	6.5419	7.60528	FTE1_peak_5	chr1_8066903_8067034	.	PARK7	ERRFI1
chr1	8068290	8068498	209	8068339	15.63	10.6093	6.3349	6.70697	FTE1_peak_6	chr1_8068290_8068498	.	PARK7	ERRFI1
chr1	8072975	8073315	341	8073118	13.75	7.53305	4.91787	3.98652	FTE1_peak_7	chr1_8072975_8073315	ERRFI1	PARK7	.
chr1	8075966	8076272	307	8076176	12.5	9.07861	6.02844	5.34078	FTE1_peak_8	chr1_8075966_8076272	ERRFI1	.	.
chr1	8143134	8143259	126	8143171	15.63	9.31879	5.54303	5.55219	FTE1_peak_9	chr1_8143134_8143259	.	.	.
chr1	8157635	8157764	130	8157725	15	12.332	7.14484	8.24545	FTE1_peak_10	chr1_8157635_8157764	.	.	.
chr1	8181013	8181137	125	8181088	13.13	8.44046	5.2571	4.76542	FTE1_peak_11	chr1_8181013_8181137	.	.	.
chr1	8181313	8181468	156	8181404	15.63	7.68251	4.58734	4.12323	FTE1_peak_12	chr1_8181313_8181468	.	.	.
chr1	8194075	8194270	196	8194173	14.38	10.0841	6.15151	6.26448	FTE1_peak_13	chr1_8194075_8194270	.	.	.
chr1	8197768	8198203	436	8197912	35.01	35.2529	14.0524	29.8805	FTE1_peak_14	chr1_8197768_8198203	.	.	.
chr1	8272094	8272333	240	8272234	22.51	15.2974	7.26051	10.9929	FTE1_peak_15	chr1_8272094_8272333	.	.	.
chr1	8456783	8456930	148	8456841	18.75	9.25272	4.93873	5.50444	FTE1_peak_16	chr1_8456783_8456930	RERE	.	.
chr1	8686243	8686863	621	8686662	53.14	66.8485	24.1699	60.4719	FTE1_peak_17	chr1_8686243_8686863	RERE	.	.
chr1	8735169	8735293	125	8735195	11.25	8.05487	5.47024	4.40147	FTE1_peak_18	chr1_8735169_8735293	RERE	.	.
chr1	8918229	8918507	279	8918405	21.26	17.8738	8.94697	13.3916	FTE1_peak_19	chr1_8918229_8918507	.	.	ENO1;ENO1-AS1
chr1	9224094	9224234	141	9224177	17.5	11.2084	6.1682	7.25339	FTE1_peak_20	chr1_9224094_9224234	.	MIR34A	.
chr1	10127225	10127364	140	10127262	13.75	9.71286	6.3117	5.92945	FTE1_peak_21	chr1_10127225_10127364	UBE4B	.	.
chr1	10588461	10588720	260	10588614	19.38	15.2846	8.03156	10.9802	FTE1_peak_22	chr1_10588461_10588720	PEX14	.	.
chr1	11968162	11969027	866	11968607	60.02	51.1359	13.1926	45.2876	FTE1_peak_23	chr1_11968162_11969027	.	.	KIAA2013;PLOD1
chr1	11969726	11970020	295	11969880	32.51	28.0168	11.2634	22.947	FTE1_peak_24	chr1_11969726_11970020	.	.	KIAA2013;PLOD1
chr1	12609997	12610143	147	12610083	18.13	6.88913	3.64376	3.48214	FTE1_peak_25	chr1_12609997_12610143	.	.	DHRS3
chr1	16702128	16702398	271	16702263	24.38	19.0806	8.79009	14.5089	FTE1_peak_26	chr1_16702128_16702398	C1orf144	FBXO42	SPATA21
chr1	16839824	16840824	1001	16840572	76.9	55.8153	11.1279	49.8432	FTE1_peak_27	chr1_16839824_16840824	.	CROCCP3	.
chr1	17222592	17222847	256	17222737	46.26	55.5501	21.0998	49.5829	FTE1_peak_28	chr1_17222592_17222847	.	.	CROCC
chr1	17222956	17223660	705	17223071	62.52	81.9432	28.3564	74.9286	FTE1_peak_29	chr1_17222956_17223660	.	.	CROCC
chr1	17231872	17232144	273	17231948	28.76	12.7692	4.95959	8.6644	FTE1_peak_30	chr1_17231872_17232144	.	.	CROCC
chr1	17454933	17455205	273	17455108	30.63	22.025	8.72636	17.2827	FTE1_peak_31	chr1_17454933_17455205	.	PADI2	.
chr1	17495057	17495277	221	17495213	19.38	15.4837	8.15203	11.1694	FTE1_peak_32	chr1_17495057_17495277	.	.	.
chr1	17614096	17614237	142	17614212	11.25	7.56973	5.15914	4.01737	FTE1_peak_33	chr1_17614096_17614237	.	PADI3	PADI4
chr1	18095445	18095569	125	18095511	10	7.06535	4.91204	3.5552	FTE1_peak_34	chr1_18095445_18095569	ACTL8	.	.
chr1	18193098	18193248	151	18193173	18.75	14.7495	8.14636	10.4742	FTE1_peak_35	chr1_18193098_18193248	.	.	.
chr1	18201172	18201439	268	18201270	15	12.332	7.14484	8.24545	FTE1_peak_36	chr1_18201172_18201439	.	.	.
chr1	19336373	19336631	259	19336418	14.38	7.44396	4.55667	3.91678	FTE1_peak_37	chr1_19336373_19336631	.	.	.
chr1	19835550	19835674	125	19835608	20.01	14.2141	7.00175	9.98737	FTE1_peak_38	chr1_19835550_19835674	.	CAPZB	.
chr1	20927987	20928278	292	20928179	25.63	23.8808	11.3933	19.0217	FTE1_peak_39	chr1_20927987_20928278	CDA	.	.
chr1	20930782	20931012	231	20930962	20.63	8.71601	4.32608	5.02614	FTE1_peak_40	chr1_20930782_20931012	CDA	.	PINK1
chr1	21223454	21223647	194	21223546	25.01	23.5843	10.9501	18.7314	FTE1_peak_41	chr1_21223454_21223647	EIF4G3	.	.
chr1	21348934	21349058	125	21348971	15.63	10.0131	5.9656	6.21986	FTE1_peak_42	chr1_21348934_21349058	EIF4G3	.	.
chr1	21650992	21651590	599	21651092	21.26	11.7967	5.56389	7.8066	FTE1_peak_43	chr1_21650992_21651590	ECE1	LOC100506801	.
chr1	21777698	21778025	328	21777786	21.26	19.5105	9.93584	14.8878	FTE1_peak_44	chr1_21777698_21778025	NBPF3	.	.
chr1	22251277	22251401	125	22251349	15	8.56832	4.90542	4.88612	FTE1_peak_45	chr1_22251277_22251401	HSPG2	.	.
chr1	23426890	23427062	173	23426955	19.38	17.0303	9.09854	12.5833	FTE1_peak_46	chr1_23426890_23427062	LUZP1	KDM1A	.
chr1	23428848	23428985	138	23428925	15.63	11.6685	7.00173	7.68431	FTE1_peak_47	chr1_23428848_23428985	LUZP1	KDM1A	.
chr1	23882700	23884421	1722	23883875	46.89	33.9639	10.0551	28.6364	FTE1_peak_48	chr1_23882700_23884421	.	E2F2	ID3
chr1	23912179	23912307	129	23912241	18.13	11.3193	5.88608	7.35029	FTE1_peak_49	chr1_23912179_23912307	.	ID3	.
chr1	24592931	24593241	311	24593177	18.13	15.8213	8.54034	11.4425	FTE1_peak_50	chr1_24592931_24593241	.	.	.
chr1	25120137	25120523	387	25120414	17.5	8.44714	4.62615	4.77024	FTE1_peak_51	chr1_25120137_25120523	CLIC4	.	.
chr1	25687340	25687464	125	25687389	10.63	7.06535	5.19114	3.5552	FTE1_peak_52	chr1_25687340_25687464	TMEM50A	.	RHCE
chr1	25687827	25687960	134	25687884	18.13	15.8213	8.54034	11.4425	FTE1_peak_53	chr1_25687827_25687960	TMEM50A	.	RHCE
chr1	26285019	26285154	136	26285095	15.63	9.71651	5.78404	5.93174	FTE1_peak_54	chr1_26285019_26285154	.	.	PAFAH2
chr1	27032097	27032469	373	27032354	20.63	16.1504	8.35958	11.7625	FTE1_peak_55	chr1_27032097_27032469	ARID1A	.	.
chr1	27098172	27098328	157	27098259	15.63	11.2213	6.71883	7.25507	FTE1_peak_56	chr1_27098172_27098328	ARID1A	.	PIGV
chr1	27288471	27288606	136	27288511	18.13	9.02306	4.66579	5.32332	FTE1_peak_57	chr1_27288471_27288606	.	C1orf172;NUDC	.
chr1	27618888	27619047	160	27619043	11.88	5.86499	4.29271	2.57335	FTE1_peak_58	chr1_27618888_27619047	WDTC1	.	TMEM222
chr1	27866894	27867112	219	27866980	17.5	9.40261	5.14016	5.63456	FTE1_peak_59	chr1_27866894_27867112	AHDC1	.	.
chr1	28295285	28295467	183	28295398	15.63	10.1452	6.04695	6.27309	FTE1_peak_60	chr1_28295285_28295467	.	SMPDL3B;XKR8	EYA3
chr1	28832482	28832746	265	28832586	26.88	14.8095	6.19601	10.5322	FTE1_peak_61	chr1_28832482_28832746	RCC1;SNHG3	PHACTR4	.
chr1	28834583	28834790	208	28834740	15	8.98416	5.14183	5.28553	FTE1_peak_62	chr1_28834583_28834790	RCC1;SNHG3	PHACTR4	.
chr1	28834969	28835469	501	28835081	16.88	9.59241	5.56558	5.81374	FTE1_peak_63	chr1_28834969_28835469	RCC1;SNHG3	PHACTR4	.
chr1	28835575	28835867	293	28835785	15.63	6.9063	4.15728	3.49389	FTE1_peak_64	chr1_28835575_28835867	RCC1;SNHG3	PHACTR4	.
chr1	28836059	28837668	1610	28836732	27.51	21.011	9.01414	16.3074	FTE1_peak_65	chr1_28836059_28837668	RCC1;SNHG3	PHACTR4	.
chr1	28837813	28838226	414	28838152	18.75	10.9244	5.85331	7.01389	FTE1_peak_66	chr1_28837813_28838226	RCC1	PHACTR4;SNHG3	.
chr1	28928334	28928472	139	28928413	15.63	9.31879	5.54303	5.55219	FTE1_peak_67	chr1_28928334_28928472	.	RAB42;SNHG12;SNORA16A;SNORA44;SNORA61;SNORD99;TRNAU1AP	TAF12
chr1	28975067	28975836	770	28975357	81.9	84.84	20.7241	77.618	FTE1_peak_68	chr1_28975067_28975836	RNU11	TAF12	GMEB1
chr1	31869882	31870098	217	31870046	17.5	8.44714	4.62615	4.77024	FTE1_peak_69	chr1_31869882_31870098	.	FABP3	SERINC2
chr1	31870292	31870451	160	31870378	15	9.71651	5.56659	5.93174	FTE1_peak_70	chr1_31870292_31870451	.	FABP3	SERINC2
chr1	31873425	31873602	178	31873508	14.38	10.2847	6.27705	6.39441	FTE1_peak_71	chr1_31873425_31873602	.	FABP3	SERINC2
chr1	31956333	31956513	181	31956418	21.88	15.2574	7.62691	10.9537	FTE1_peak_72	chr1_31956333_31956513	.	.	LOC149086;LOC284551
chr1	32532052	32532265	214	32532098	17.5	13.1336	7.32855	9.02003	FTE1_peak_73	chr1_32532052_32532265	.	KHDRBS1	TMEM39B
chr1	32599139	32599311	173	32599213	23.76	11.0053	4.95125	7.08926	FTE1_peak_74	chr1_32599139_32599311	KPNA6	.	.
chr1	33564958	33565137	180	33565069	16.25	11.4281	6.45019	7.45729	FTE1_peak_75	chr1_33564958_33565137	ADC	.	.
chr1	33899386	33899655	270	33899573	26.88	17.4212	7.48512	12.9514	FTE1_peak_76	chr1_33899386_33899655	.	.	.
chr1	33921476	33921603	128	33921570	17.5	11.2084	6.1682	7.25339	FTE1_peak_77	chr1_33921476_33921603	.	.	ZSCAN20
chr1	35513178	35513373	196	35513278	18.75	14.6826	8.10458	10.4092	FTE1_peak_78	chr1_35513178_35513373	.	ZMYM6	.
chr1	36714042	36714197	156	36714109	20.01	14.0602	6.91531	9.8492	FTE1_peak_79	chr1_36714042_36714197	THRAP3	.	.
chr1	36818164	36818399	236	36818236	18.13	9.25272	4.78244	5.50444	FTE1_peak_80	chr1_36818164_36818399	STK40	FAM176B	.
chr1	36840294	36840490	197	36840313	16.25	7.66459	4.31357	4.10596	FTE1_peak_81	chr1_36840294_36840490	STK40	.	LSM10
chr1	36852214	36852338	125	36852242	11.88	6.15182	4.47935	2.79382	FTE1_peak_82	chr1_36852214_36852338	.	STK40	LSM10
chr1	38000174	38000299	126	38000265	15	9.31879	5.33465	5.55219	FTE1_peak_83	chr1_38000174_38000299	SNIP1	MEAF6	DNALI1
chr1	38424443	38424648	206	38424526	19.38	13.5434	6.99745	9.35068	FTE1_peak_84	chr1_38424443_38424648	SF3A3	INPP5B	.
chr1	39644248	39644398	151	39644367	15	12.332	7.14484	8.24545	FTE1_peak_85	chr1_39644248_39644398	MACF1	.	.
chr1	40400015	40400295	281	40400234	19.38	11.8525	6.03854	7.86013	FTE1_peak_86	chr1_40400015_40400295	.	.	MFSD2A
chr1	40525265	40525389	125	40525344	15	12.332	7.14484	8.24545	FTE1_peak_87	chr1_40525265_40525389	CAP1	.	PPT1
chr1	42095349	42095528	180	42095449	20.01	10.9285	5.25131	7.01523	FTE1_peak_88	chr1_42095349_42095528	HIVEP3	.	.
chr1	42238923	42239111	189	42238992	13.75	9.50985	6.17952	5.73726	FTE1_peak_89	chr1_42238923_42239111	HIVEP3	.	.
chr1	42367856	42368027	172	42367936	28.13	27.6224	12.3312	22.5652	FTE1_peak_90	chr1_42367856_42368027	HIVEP3	.	.
chr1	42687999	42688219	221	42688113	13.75	10.1341	6.58664	6.26448	FTE1_peak_91	chr1_42687999_42688219	FOXJ3	.	.
chr1	43406588	43406882	295	43406817	20.63	15.9529	8.24016	11.5687	FTE1_peak_92	chr1_43406588_43406882	SLC2A1	.	FLJ32224
chr1	43406990	43407194	205	43407023	13.13	9.08114	5.65138	5.34078	FTE1_peak_93	chr1_43406990_43407194	SLC2A1	.	FLJ32224
chr1	43407571	43407699	129	43407658	14.38	11.2192	6.86574	7.25339	FTE1_peak_94	chr1_43407571_43407699	SLC2A1	.	FLJ32224
chr1	43672597	43672905	309	43672707	17.5	14.2893	8.04548	10.0593	FTE1_peak_95	chr1_43672597_43672905	WDR65	.	.
chr1	43941826	43941964	139	43941894	18.75	14.6826	8.10458	10.4092	FTE1_peak_96	chr1_43941826_43941964	.	HYI;SZT2	.
chr1	44300038	44300491	454	44300406	16.25	13.4709	7.70304	9.27938	FTE1_peak_97	chr1_44300038_44300491	ST3GAL3	.	.
chr1	44300744	44301029	286	44300908	18.75	12.1886	6.58497	8.17106	FTE1_peak_98	chr1_44300744_44301029	ST3GAL3	.	.
chr1	44504701	44504885	185	44504825	16.25	10.6329	5.9755	6.73029	FTE1_peak_99	chr1_44504701_44504885	.	SLC6A9	.
chr1	45186876	45187646	771	45187462	51.89	37.5979	10.2946	32.1421	FTE1_peak_100	chr1_45186876_45187646	C1orf228	.	KIF2C
chr1	45195880	45196880	1001	45196438	55.01	37.2939	9.14521	31.8436	FTE1_peak_101	chr1_45195880_45196880	.	C1orf228	KIF2C
chr1	45284990	45285715	726	45285400	41.89	35.494	12.2531	30.1104	FTE1_peak_102	chr1_45284990_45285715	PTCH2	BTBD19;PLK3;TCTEX1D4	.
chr1	45712530	45712740	211	45712641	21.88	16.7513	8.51376	12.3384	FTE1_peak_103	chr1_45712530_45712740	.	.	.
chr1	46188604	46188785	182	46188685	22.51	20.7033	10.4471	16.0365	FTE1_peak_104	chr1_46188604_46188785	IPP	TMEM69	.
chr1	48667729	48667873	145	48667792	16.88	10.2513	5.95981	6.36151	FTE1_peak_105	chr1_48667729_48667873	.	SKINTL	SLC5A9
chr1	51528912	51529061	150	51528988	14.38	10.336	6.30924	6.44497	FTE1_peak_106	chr1_51528912_51529061	.	.	.
chr1	52363388	52363690	303	52363526	30.63	29.0868	12.6532	23.9482	FTE1_peak_107	chr1_52363388_52363690	.	NRD1	RAB3B
chr1	52363911	52364081	171	52364001	23.13	21.9875	10.7249	17.2461	FTE1_peak_108	chr1_52363911_52364081	.	NRD1	RAB3B
chr1	52390211	52390384	174	52390315	13.13	10.1341	6.30754	6.26448	FTE1_peak_109	chr1_52390211_52390384	RAB3B	.	.
chr1	53174128	53174271	144	53174196	18.75	11.7396	6.32158	7.75347	FTE1_peak_110	chr1_53174128_53174271	.	SELRC1	ZYG11B
chr1	53712219	53712542	324	53712453	11.88	8.05487	5.74934	4.40147	FTE1_peak_111	chr1_53712219_53712542	LRP8	C1orf123;LOC100507564;MAGOH	.
chr1	54198726	54198960	235	54198822	26.88	18.8871	8.26135	14.32	FTE1_peak_112	chr1_54198726_54198960	GLIS1	.	.
chr1	55370360	55370549	190	55370460	16.25	7.66459	4.31357	4.10596	FTE1_peak_113	chr1_55370360_55370549	.	DHCR24	.
chr1	55776920	55777049	130	55777005	16.88	9.48359	5.50136	5.71155	FTE1_peak_114	chr1_55776920_55777049	.	.	.
chr1	55894855	55895044	190	55894952	18.13	14.3571	7.6519	10.121	FTE1_peak_115	chr1_55894855_55895044	.	.	.
chr1	56097879	56098031	153	56097967	13.13	9.08114	5.65138	5.34078	FTE1_peak_116	chr1_56097879_56098031	.	.	.
chr1	56184553	56184891	339	56184818	15	12.332	7.14484	8.24545	FTE1_peak_117	chr1_56184553_56184891	.	.	.
chr1	57298077	57298236	160	57298137	16.88	7.66459	4.46986	4.10596	FTE1_peak_118	chr1_57298077_57298236	.	C1orf168	C8A
chr1	58102854	58103038	185	58102957	16.88	13.4709	7.98214	9.27938	FTE1_peak_119	chr1_58102854_58103038	DAB1	.	.
chr1	59221291	59221446	156	59221395	15.63	12.332	7.42394	8.24545	FTE1_peak_120	chr1_59221291_59221446	.	.	JUN;LOC100131060
chr1	59228963	59229163	201	59229060	20.63	18.1908	9.61352	13.6971	FTE1_peak_121	chr1_59228963_59229163	.	.	JUN;LOC100131060
chr1	59229512	59229752	241	59229601	10.63	7.06535	5.19114	3.5552	FTE1_peak_122	chr1_59229512_59229752	.	.	JUN;LOC100131060
chr1	59347312	59347512	201	59347414	19.38	17.0303	9.09854	12.5833	FTE1_peak_123	chr1_59347312_59347512	LOC100131060	.	.
chr1	59349135	59349259	125	59349253	11.88	5.86499	4.29271	2.57335	FTE1_peak_124	chr1_59349135_59349259	LOC100131060	.	.
chr1	59509497	59509710	214	59509598	12.5	9.07861	6.02844	5.34078	FTE1_peak_125	chr1_59509497_59509710	.	.	.
chr1	59639516	59639656	141	59639569	18.13	15.8213	8.54034	11.4425	FTE1_peak_126	chr1_59639516_59639656	.	HSD52	.
chr1	59833554	59833701	148	59833613	16.25	13.4709	7.70304	9.27938	FTE1_peak_127	chr1_59833554_59833701	FGGY	.	.
chr1	60144553	60144711	159	60144652	12.5	9.07861	6.02844	5.34078	FTE1_peak_128	chr1_60144553_60144711	FGGY	.	.
chr1	60460224	60460354	131	60460319	13.13	10.1341	6.30754	6.26448	FTE1_peak_129	chr1_60460224_60460354	C1orf87	.	.
chr1	60637527	60637667	141	60637603	18.13	15.8213	8.54034	11.4425	FTE1_peak_130	chr1_60637527_60637667	.	.	.
chr1	61753271	61753721	451	61753504	20.63	18.2604	9.65674	13.7189	FTE1_peak_131	chr1_61753271_61753721	NFIA	.	.
chr1	64096528	64096697	170	64096618	10.63	7.06535	5.19114	3.5552	FTE1_peak_132	chr1_64096528_64096697	PGM1	.	.
chr1	64292211	64292336	126	64292250	12.5	9.07861	6.02844	5.34078	FTE1_peak_133	chr1_64292211_64292336	ROR1	.	.
chr1	64386222	64386518	297	64386390	33.76	35.8175	15.5178	30.4096	FTE1_peak_134	chr1_64386222_64386518	ROR1	.	.
chr1	64504837	64505233	397	64505200	16.25	13.4709	7.70304	9.27938	FTE1_peak_135	chr1_64504837_64505233	ROR1	.	.
chr1	64505345	64505523	179	64505468	12.5	9.07861	6.02844	5.34078	FTE1_peak_136	chr1_64505345_64505523	ROR1	.	.
chr1	64637501	64637641	141	64637551	13.75	10.1341	6.58664	6.26448	FTE1_peak_137	chr1_64637501_64637641	ROR1	.	.
chr1	64689029	64689214	186	64689109	19.38	17.0303	9.09854	12.5833	FTE1_peak_138	chr1_64689029_64689214	UBE2U	.	.
chr1	65363869	65364104	236	65364013	16.88	13.4709	7.98214	9.27938	FTE1_peak_139	chr1_65363869_65364104	JAK1	.	.
chr1	65383209	65383425	217	65383343	16.88	13.4709	7.98214	9.27938	FTE1_peak_140	chr1_65383209_65383425	JAK1	.	.
chr1	65640414	65640549	136	65640481	15	12.2158	7.07356	8.19737	FTE1_peak_141	chr1_65640414_65640549	AK4	.	.
chr1	65891445	65891736	292	65891568	21.88	19.5105	10.2149	14.8878	FTE1_peak_142	chr1_65891445_65891736	LEPR;LEPROT	DNAJC6	.
chr1	65895551	65895682	132	65895632	18.13	15.7587	8.50212	11.4346	FTE1_peak_143	chr1_65895551_65895682	LEPR;LEPROT	DNAJC6	.
chr1	65975795	65975924	130	65975862	13.13	10.089	6.27931	6.26448	FTE1_peak_144	chr1_65975795_65975924	LEPR	.	.
chr1	66286708	66286911	204	66286790	18.13	15.3088	8.22785	11.0037	FTE1_peak_145	chr1_66286708_66286911	PDE4B	.	.
chr1	67030042	67030248	207	67030189	22.51	12.6839	5.87648	8.58545	FTE1_peak_146	chr1_67030042_67030248	SGIP1	.	.
chr1	67526534	67526703	170	67526634	28.76	28.7582	13.285	23.6384	FTE1_peak_147	chr1_67526534_67526703	.	SLC35D1	.
chr1	68257837	68258179	343	68257929	16.25	11.6314	6.57305	7.65296	FTE1_peak_148	chr1_68257837_68258179	GNG12	.	.
chr1	68453165	68453399	235	68453303	17.5	14.6345	8.26124	10.362	FTE1_peak_149	chr1_68453165_68453399	LOC100289178	.	.
chr1	68639901	68640067	167	68640014	14.38	11.2192	6.86574	7.25339	FTE1_peak_150	chr1_68639901_68640067	LOC100289178;WLS	.	MIR1262
chr1	68850783	68850918	136	68850833	14.38	8.41215	5.12626	4.73758	FTE1_peak_151	chr1_68850783_68850918	.	.	.
chr1	70377042	70377230	189	70377108	15	12.332	7.14484	8.24545	FTE1_peak_152	chr1_70377042_70377230	LRRC7	.	PIN1P1
chr1	70556457	70556845	389	70556766	23.76	20.1912	9.90249	15.5394	FTE1_peak_153	chr1_70556457_70556845	LRRC7	.	.
chr1	71245260	71245470	211	71245383	13.75	10.1341	6.58664	6.26448	FTE1_peak_154	chr1_71245260_71245470	.	.	.
chr1	71479805	71480046	242	71479943	19.38	17.0303	9.09854	12.5833	FTE1_peak_155	chr1_71479805_71480046	PTGER3	.	.
chr1	71555726	71555873	148	71555840	11.88	8.05487	5.74934	4.40147	FTE1_peak_156	chr1_71555726_71555873	ZRANB2-AS2	MIR186;ZRANB2;ZRANB2-AS1	.
chr1	72750469	72750693	225	72750565	33.76	27.6767	10.8199	22.6185	FTE1_peak_157	chr1_72750469_72750693	.	NEGR1	.
chr1	76252010	76252281	272	76252222	11.88	6.15182	4.47935	2.79382	FTE1_peak_158	chr1_76252010_76252281	RABGGTB	ACADM	MSH4;SNORD45A;SNORD45B;SNORD45C
chr1	76252506	76252718	213	76252548	11.88	7.28299	5.22969	3.76211	FTE1_peak_159	chr1_76252506_76252718	RABGGTB	ACADM	MSH4;SNORD45A;SNORD45B;SNORD45C
chr1	77464259	77464560	302	77464437	24.38	23.373	11.3313	18.5309	FTE1_peak_160	chr1_77464259_77464560	ST6GALNAC5	.	.
chr1	77505593	77505727	135	77505646	13.75	10.1341	6.58664	6.26448	FTE1_peak_161	chr1_77505593_77505727	ST6GALNAC5	.	.
chr1	77836672	77836934	263	77836740	15.63	5.31046	3.32582	2.06898	FTE1_peak_162	chr1_77836672_77836934	AK5	.	.
chr1	77977275	77977472	198	77977351	15	12.332	7.14484	8.24545	FTE1_peak_163	chr1_77977275_77977472	AK5	.	.
chr1	77980209	77980419	211	77980322	21.26	19.5105	9.93584	14.8878	FTE1_peak_164	chr1_77980209_77980419	AK5	.	.
chr1	78297808	78298032	225	78297882	16.88	10.2513	5.95981	6.36151	FTE1_peak_165	chr1_78297808_78298032	FAM73A	.	.
chr1	78298703	78298898	196	78298723	10.63	7.06535	5.19114	3.5552	FTE1_peak_166	chr1_78298703_78298898	FAM73A	.	.
chr1	78407052	78407287	236	78407070	11.88	8.01672	5.72361	4.40147	FTE1_peak_167	chr1_78407052_78407287	NEXN	.	FUBP1
chr1	78469987	78470192	206	78470126	20.63	17.6099	9.25365	13.1355	FTE1_peak_168	chr1_78469987_78470192	.	FUBP1	DNAJB4
chr1	78470480	78470768	289	78470689	15.63	11.4406	6.85736	7.46923	FTE1_peak_169	chr1_78470480_78470768	DNAJB4	FUBP1	.
chr1	78567306	78567555	250	78567371	23.13	22.0676	10.7731	17.2871	FTE1_peak_170	chr1_78567306_78567555	GIPC2	.	.
chr1	78567814	78568041	228	78567921	22.51	20.7799	10.494	16.0826	FTE1_peak_171	chr1_78567814_78568041	GIPC2	.	.
chr1	78806294	78806490	197	78806448	14.38	11.2192	6.86574	7.25339	FTE1_peak_172	chr1_78806294_78806490	MGC27382	.	.
chr1	78814711	78814846	136	78814750	14.38	11.2192	6.86574	7.25339	FTE1_peak_173	chr1_78814711_78814846	MGC27382	.	.
chr1	79297487	79297670	184	79297577	20.01	15.3287	7.63827	11.0214	FTE1_peak_174	chr1_79297487_79297670	.	.	.
chr1	79299104	79299325	222	79299165	18.75	15.8213	8.81944	11.4425	FTE1_peak_175	chr1_79299104_79299325	.	.	.
chr1	82148217	82148365	149	82148323	13.13	9.31474	5.79629	5.55219	FTE1_peak_176	chr1_82148217_82148365	.	.	.
chr1	82172823	82172992	170	82172879	14.38	8.41215	5.12626	4.73758	FTE1_peak_177	chr1_82172823_82172992	.	.	.
chr1	84831310	84831441	132	84831367	17.5	14.6345	8.26124	10.362	FTE1_peak_178	chr1_84831310_84831441	UOX	SAMD13	.
chr1	85763566	85764148	583	85763734	20.01	18.2604	9.37764	13.7189	FTE1_peak_179	chr1_85763566_85764148	.	BCL10;LOC646626	DDAH1
chr1	85779780	85779931	152	85779873	14.38	11.2192	6.86574	7.25339	FTE1_peak_180	chr1_85779780_85779931	.	.	DDAH1
chr1	85786004	85786286	283	85786182	19.38	7.99138	4.07602	4.40147	FTE1_peak_181	chr1_85786004_85786286	DDAH1	.	.
chr1	85794741	85794948	208	85794825	25.01	22.6539	10.4026	17.854	FTE1_peak_182	chr1_85794741_85794948	DDAH1	.	.
chr1	85796030	85796268	239	85796153	14.38	10.2847	6.27705	6.39441	FTE1_peak_183	chr1_85796030_85796268	DDAH1	.	.
chr1	85796624	85796918	295	85796813	15	11.5534	6.66831	7.57923	FTE1_peak_184	chr1_85796624_85796918	DDAH1	.	.
chr1	85804939	85805071	133	85805008	13.13	9.21998	5.73744	5.47544	FTE1_peak_185	chr1_85804939_85805071	DDAH1	.	.
chr1	85829528	85829691	164	85829674	10.63	7.06535	5.19114	3.5552	FTE1_peak_186	chr1_85829528_85829691	DDAH1	.	.
chr1	85987792	85988180	389	85988000	18.75	12.377	6.69658	8.28962	FTE1_peak_187	chr1_85987792_85988180	DDAH1	.	.
chr1	85991647	85991812	166	85991707	16.88	10.2513	5.95981	6.36151	FTE1_peak_188	chr1_85991647_85991812	DDAH1	.	.
chr1	86000647	86000787	141	86000682	16.25	9.62915	5.39196	5.84795	FTE1_peak_189	chr1_86000647_86000787	DDAH1	.	.
chr1	86047386	86048531	1146	86047474	36.88	16.5999	5.31715	12.192	FTE1_peak_190	chr1_86047386_86048531	CYR61	DDAH1	.
chr1	86048627	86050854	2228	86049988	76.9	88.6754	24.8271	81.2285	FTE1_peak_191	chr1_86048627_86050854	CYR61	DDAH1	.
chr1	86072770	86073285	516	86072883	24.38	23.373	11.3313	18.5309	FTE1_peak_192	chr1_86072770_86073285	.	CYR61;DDAH1	.
chr1	86073526	86073783	258	86073740	11.88	8.05487	5.74934	4.40147	FTE1_peak_193	chr1_86073526_86073783	.	CYR61;DDAH1	.
chr1	86094473	86094649	177	86094593	14.38	8.41215	5.12626	4.73758	FTE1_peak_194	chr1_86094473_86094649	.	.	ZNHIT6
chr1	86315934	86316191	258	86316078	19.38	15.4837	8.15203	11.1694	FTE1_peak_195	chr1_86315934_86316191	COL24A1	.	.
chr1	90331673	90331979	307	90331799	32.51	27.847	11.1695	22.7809	FTE1_peak_196	chr1_90331673_90331979	LRRC8D	.	.
chr1	90352924	90353074	151	90353057	11.25	8.05487	5.47024	4.40147	FTE1_peak_197	chr1_90352924_90353074	LRRC8D	.	.
chr1	90373255	90373444	190	90373396	10.63	7.06535	5.19114	3.5552	FTE1_peak_198	chr1_90373255_90373444	LRRC8D	.	.
chr1	92166014	92166158	145	92166121	16.25	13.4709	7.70304	9.27938	FTE1_peak_199	chr1_92166014_92166158	TGFBR3	.	.
chr1	92366124	92366405	282	92366270	26.26	24.5783	11.2982	19.6941	FTE1_peak_200	chr1_92366124_92366405	TGFBR3	.	.
chr1	92822613	92822737	125	92822676	13.75	10.1341	6.58664	6.26448	FTE1_peak_201	chr1_92822613_92822737	RPAP2	.	.
chr1	93804147	93804303	157	93804152	12.5	5.86251	4.00097	2.57335	FTE1_peak_202	chr1_93804147_93804303	LOC100131564	.	DR1
chr1	94081391	94081533	143	94081478	13.75	10.1341	6.58664	6.26448	FTE1_peak_203	chr1_94081391_94081533	BCAR3	LOC100129046	.
chr1	94081703	94081855	153	94081795	14.38	11.2192	6.86574	7.25339	FTE1_peak_204	chr1_94081703_94081855	BCAR3	LOC100129046	.
chr1	94130039	94130423	385	94130274	13.75	9.92436	6.44967	6.13335	FTE1_peak_205	chr1_94130039_94130423	BCAR3	.	.
chr1	94158930	94159121	192	94159024	16.25	12.0044	6.79971	8.00792	FTE1_peak_206	chr1_94158930_94159121	.	BCAR3	.
chr1	94167182	94167480	299	94167383	20.63	10.9285	5.4076	7.01523	FTE1_peak_207	chr1_94167182_94167480	.	BCAR3	.
chr1	94220034	94220291	258	94220231	20.63	17.0681	8.91976	12.6207	FTE1_peak_208	chr1_94220034_94220291	.	.	.
chr1	94245197	94245393	197	94245301	15.63	12.332	7.42394	8.24545	FTE1_peak_209	chr1_94245197_94245393	.	.	.
chr1	94275948	94276238	291	94276161	15	12.332	7.14484	8.24545	FTE1_peak_210	chr1_94275948_94276238	.	.	.
chr1	94791274	94791675	402	94791588	18.13	15.8213	8.54034	11.4425	FTE1_peak_211	chr1_94791274_94791675	.	.	.
chr1	95068020	95068265	246	95068098	20.01	10.9285	5.25131	7.01523	FTE1_peak_212	chr1_95068020_95068265	.	.	.
chr1	95193438	95193703	266	95193601	13.75	10.1341	6.58664	6.26448	FTE1_peak_213	chr1_95193438_95193703	.	.	.
chr1	95205318	95205478	161	95205398	18.75	15.8213	8.81944	11.4425	FTE1_peak_214	chr1_95205318_95205478	.	.	.
chr1	95329573	95329755	183	95329664	15	12.332	7.14484	8.24545	FTE1_peak_215	chr1_95329573_95329755	SLC44A3	.	.
chr1	95501242	95501413	172	95501331	16.88	13.4709	7.98214	9.27938	FTE1_peak_216	chr1_95501242_95501413	ALG14	.	.
chr1	96772378	96772550	173	96772462	13.75	10.1341	6.58664	6.26448	FTE1_peak_217	chr1_96772378_96772550	.	.	.
chr1	96775394	96775605	212	96775515	27.51	21.8929	9.50241	17.1565	FTE1_peak_218	chr1_96775394_96775605	.	.	.
chr1	96828172	96828483	312	96828305	31.88	30.4165	13.1533	25.2284	FTE1_peak_219	chr1_96828172_96828483	.	.	.
chr1	96836475	96836629	155	96836541	21.26	13.3321	6.35874	9.20385	FTE1_peak_220	chr1_96836475_96836629	.	.	.
chr1	96854643	96854827	185	96854735	13.13	10.1341	6.30754	6.26448	FTE1_peak_221	chr1_96854643_96854827	.	.	.
chr1	97025849	97026088	240	97026006	16.88	13.4709	7.98214	9.27938	FTE1_peak_222	chr1_97025849_97026088	.	.	.
chr1	98552302	98552597	296	98552480	38.76	35.4158	13.2534	30.034	FTE1_peak_223	chr1_98552302_98552597	.	.	.
chr1	98789304	98789835	532	98789531	20.01	13.7128	6.72168	9.5134	FTE1_peak_224	chr1_98789304_98789835	.	.	.
chr1	98793125	98793250	126	98793219	18.13	12.1886	6.37659	8.17106	FTE1_peak_225	chr1_98793125_98793250	.	.	.
chr1	98806127	98806381	255	98806303	18.75	15.8213	8.81944	11.4425	FTE1_peak_226	chr1_98806127_98806381	.	.	.
chr1	100515637	100515761	125	100515667	12.5	8.0244	5.34783	4.40147	FTE1_peak_227	chr1_100515637_100515761	HIAT1	SLC35A3	.
chr1	101062610	101062928	319	101062820	16.88	13.4709	7.98214	9.27938	FTE1_peak_228	chr1_101062610_101062928	.	.	LOC100128787
chr1	101092977	101093180	204	101093099	17.5	11.2084	6.1682	7.25339	FTE1_peak_229	chr1_101092977_101093180	LOC100128787	.	.
chr1	101096843	101097026	184	101096911	19.38	11.4584	5.82288	7.48645	FTE1_peak_230	chr1_101096843_101097026	LOC100128787	.	.
chr1	101640257	101640686	430	101640549	26.88	24.383	11.4388	19.5072	FTE1_peak_231	chr1_101640257_101640686	.	.	.
chr1	102204114	102204292	179	102204216	18.75	15.8213	8.81944	11.4425	FTE1_peak_232	chr1_102204114_102204292	.	.	.
chr1	103345213	103345403	191	103345316	18.13	15.8213	8.54034	11.4425	FTE1_peak_233	chr1_103345213_103345403	COL11A1	.	.
chr1	109045812	109046035	224	109045915	28.76	28.6606	13.2256	23.5698	FTE1_peak_234	chr1_109045812_109046035	.	.	.
chr1	109373926	109374122	197	109374031	16.25	7.66459	4.31357	4.10596	FTE1_peak_235	chr1_109373926_109374122	AKNAD1	STXBP3	SRG7
chr1	109704955	109705237	283	109705173	15	12.1525	7.0347	8.1508	FTE1_peak_236	chr1_109704955_109705237	KIAA1324	.	.
chr1	109739979	109740135	157	109740027	13.75	6.91724	4.53957	3.50397	FTE1_peak_237	chr1_109739979_109740135	KIAA1324	.	SARS
chr1	110138221	110138379	159	110138293	16.88	13.4709	7.98214	9.27938	FTE1_peak_238	chr1_110138221_110138379	GNAI3	.	AMPD2;GNAT2;MIR197
chr1	110263775	110263932	158	110263874	14.38	11.2192	6.86574	7.25339	FTE1_peak_239	chr1_110263775_110263932	.	GSTM1;GSTM5	EPS8L3;GSTM3
chr1	110518490	110518673	184	110518594	21.88	18.0254	9.29167	13.5384	FTE1_peak_240	chr1_110518490_110518673	.	.	AHCYL1
chr1	111230037	111230162	126	111230132	12.5	9.07861	6.02844	5.34078	FTE1_peak_241	chr1_111230037_111230162	.	KCNA3	.
chr1	111625157	111625387	231	111625259	26.26	20.7457	9.08563	16.0681	FTE1_peak_242	chr1_111625157_111625387	.	.	.
chr1	112106324	112106475	152	112106381	9.38	6.11291	4.63294	2.75804	FTE1_peak_243	chr1_112106324_112106475	ADORA3	.	.
chr1	112947062	112947396	335	112947165	32.51	33.7262	14.5689	28.4016	FTE1_peak_244	chr1_112947062_112947396	CTTNBP2NL	.	.
chr1	113065266	113065511	246	113065456	16.88	13.4709	7.98214	9.27938	FTE1_peak_245	chr1_113065266_113065511	.	WNT2B	ST7L
chr1	115711431	115711673	243	115711551	19.38	17.0303	9.09854	12.5833	FTE1_peak_246	chr1_115711431_115711673	.	.	.
chr1	115722033	115722567	535	115722369	14.38	11.2192	6.86574	7.25339	FTE1_peak_247	chr1_115722033_115722567	.	.	.
chr1	115968978	115969484	507	115969376	16.88	13.4709	7.98214	9.27938	FTE1_peak_248	chr1_115968978_115969484	.	.	.
chr1	116039849	116039984	136	116039908	15.63	12.332	7.42394	8.24545	FTE1_peak_249	chr1_116039849_116039984	.	.	.
chr1	116088412	116088680	269	116088589	17.5	8.44714	4.62615	4.77024	FTE1_peak_250	chr1_116088412_116088680	.	.	.
chr1	116088980	116089109	130	116088997	11.88	5.86499	4.29271	2.57335	FTE1_peak_251	chr1_116088980_116089109	.	.	.
chr1	116520353	116520535	183	116520431	16.88	10.2513	5.95981	6.36151	FTE1_peak_252	chr1_116520353_116520535	SLC22A15	.	.
chr1	117051982	117052140	159	117052095	14.38	8.41215	5.12626	4.73758	FTE1_peak_253	chr1_117051982_117052140	.	.	CD58
chr1	118364452	118364599	148	118364496	13.75	10.1341	6.58664	6.26448	FTE1_peak_254	chr1_118364452_118364599	.	.	.
chr1	119822209	119822374	166	119822293	14.38	11.2192	6.86574	7.25339	FTE1_peak_255	chr1_119822209_119822374	.	.	.
chr1	144008080	144008240	161	144008162	15.63	9.16749	5.45217	5.42505	FTE1_peak_256	chr1_144008080_144008240	FLJ39739;SRGAP2P2	.	.
chr1	144534125	144534384	260	144534213	23.13	17.4005	8.04369	12.9311	FTE1_peak_257	chr1_144534125_144534384	FLJ39739;LOC728855;PPIAL4A;PPIAL4B;PPIAL4C	LOC728875	.
chr1	144908508	144908632	125	144908624	11.25	5.86499	4.08432	2.57335	FTE1_peak_258	chr1_144908508_144908632	FLJ39739;LOC728855;PDE4DIP;PPIAL4A;PPIAL4B;PPIAL4C	.	.
chr1	144941323	144941480	158	144941406	16.88	7.66459	4.46986	4.10596	FTE1_peak_259	chr1_144941323_144941480	FLJ39739;LOC728855;PDE4DIP;PPIAL4A;PPIAL4B;PPIAL4C	.	.
chr1	145015156	145015442	287	145015333	25.63	6.44959	2.95908	3.07613	FTE1_peak_260	chr1_145015156_145015442	FLJ39739;LOC728855;PDE4DIP;PPIAL4A;PPIAL4B;PPIAL4C	.	.
chr1	145083496	145083768	273	145083670	47.51	27.8936	7.46346	22.8254	FTE1_peak_261	chr1_145083496_145083768	FLJ39739;LOC728855;PPIAL4A;PPIAL4B;PPIAL4C	PDE4DIP	SEC22B
chr1	145084089	145084295	207	145084180	25.01	7.5446	3.25082	3.99786	FTE1_peak_262	chr1_145084089_145084295	FLJ39739;LOC728855;PPIAL4A;PPIAL4B;PPIAL4C	PDE4DIP	SEC22B
chr1	145092628	145092827	200	145092709	55.01	7.74945	2.24058	4.1856	FTE1_peak_263	chr1_145092628_145092827	FLJ39739;LOC728855;PPIAL4A;PPIAL4B;PPIAL4C	PDE4DIP	SEC22B
chr1	145097239	145097426	188	145097348	22.51	12.0212	5.54712	8.02434	FTE1_peak_264	chr1_145097239_145097426	FLJ39739;LOC728855;PPIAL4A;PPIAL4B;PPIAL4C;SEC22B	PDE4DIP	.
chr1	145114074	145115077	1004	145114686	73.77	71.0324	17.5928	64.4944	FTE1_peak_265	chr1_145114074_145115077	FLJ39739;LOC728855;PPIAL4A;PPIAL4B;PPIAL4C;SEC22B	.	.
chr1	145292324	145292470	147	145292360	11.88	7.56973	5.42237	4.01737	FTE1_peak_266	chr1_145292324_145292470	FLJ39739;LOC728855;PPIAL4A;PPIAL4B;PPIAL4C	NOTCH2NL	NBPF10
chr1	145382738	145383336	599	145383094	31.88	24.398	9.74322	19.5203	FTE1_peak_267	chr1_145382738_145383336	FLJ39739;LOC728855;PPIAL4A;PPIAL4B;PPIAL4C	NBPF10	HFE2
chr1	145442468	145442630	163	145442520	11.25	5.86499	4.08432	2.57335	FTE1_peak_268	chr1_145442468_145442630	FLJ39739;LOC728855;PPIAL4A;PPIAL4B;PPIAL4C;TXNIP	HFE2	ANKRD34A;POLR3GL
chr1	145442758	145443648	891	145443364	17.5	6.60524	3.70092	3.22475	FTE1_peak_269	chr1_145442758_145443648	FLJ39739;LOC728855;PPIAL4A;PPIAL4B;PPIAL4C	HFE2;TXNIP	ANKRD34A;POLR3GL
chr1	145743572	145743737	166	145743652	13.75	9.12699	5.9311	5.3857	FTE1_peak_270	chr1_145743572_145743737	FLJ39739;LOC728855;PDZK1;PPIAL4A;PPIAL4B;PPIAL4C	CD160	GPR89A
chr1	146556117	146556242	126	146556191	20.01	8.71601	4.20105	5.02614	FTE1_peak_271	chr1_146556117_146556242	FLJ39739;GPR89C;LOC728855;NBPF11;NBPF24;PDZK1P1;PPIAL4A;PPIAL4B;PPIAL4C	.	.
chr1	147735812	147736007	196	147735960	13.75	7.53305	4.91787	3.98652	FTE1_peak_272	chr1_147735812_147736007	FLJ39739;LOC728855;PPIAL4A;PPIAL4B;PPIAL4C	.	.
chr1	147737222	147737444	223	147737232	16.88	5.94584	3.57589	2.64709	FTE1_peak_273	chr1_147737222_147737444	FLJ39739;LOC728855;PPIAL4A;PPIAL4B;PPIAL4C	.	.
chr1	147806668	147806827	160	147806757	14.38	6.40067	3.96872	3.02858	FTE1_peak_274	chr1_147806668_147806827	FLJ39739;LOC728855;PPIAL4A;PPIAL4B;PPIAL4C	.	.
chr1	147994113	147994290	178	147994208	33.13	35.8175	15.2387	30.4096	FTE1_peak_275	chr1_147994113_147994290	LOC728855;PPIAL4A;PPIAL4B;PPIAL4C	.	NBPF14
chr1	148241461	148241717	257	148241607	43.14	42.0281	14.7121	36.4409	FTE1_peak_276	chr1_148241461_148241717	LOC728855;PPIAL4A;PPIAL4B;PPIAL4C;PPIAL4D;PPIAL4F	.	.
chr1	148604866	148604992	127	148604923	18.75	15.8213	8.81944	11.4425	FTE1_peak_277	chr1_148604866_148604992	LOC728855;NBPF16;PPIAL4A;PPIAL4B;PPIAL4C;PPIAL4D;PPIAL4F	NBPF15	.
chr1	149223309	149224148	840	149223670	90.02	98.0014	22.7559	88.5053	FTE1_peak_278	chr1_149223309_149224148	LOC728855;PPIAL4A;PPIAL4B;PPIAL4C	.	.
chr1	150033678	150033809	132	150033772	13.75	10.1341	6.58664	6.26448	FTE1_peak_279	chr1_150033678_150033809	.	.	VPS45
chr1	150508400	150508524	125	150508421	16.25	10.1698	5.70389	6.29761	FTE1_peak_280	chr1_150508400_150508524	.	ECM1;TARS2	ADAMTSL4;MIR4257
chr1	150584176	150584351	176	150584301	14.38	9.52389	5.80331	5.75097	FTE1_peak_281	chr1_150584176_150584351	.	.	ENSA
chr1	150854219	150854392	174	150854293	23.76	17.7677	8.46367	13.2905	FTE1_peak_282	chr1_150854219_150854392	.	ARNT	.
chr1	151961007	151961139	133	151961059	20.01	15.9529	8.002	11.5687	FTE1_peak_283	chr1_151961007_151961139	S100A10	.	.
chr1	152135401	152135607	207	152135418	10.63	7.06535	5.19114	3.5552	FTE1_peak_284	chr1_152135401_152135607	.	RPTN	.
chr1	154404191	154404318	128	154404245	20.01	12.5904	6.11062	8.49844	FTE1_peak_285	chr1_154404191_154404318	IL6R	.	.
chr1	154945257	154945485	229	154945422	15.63	7.35706	4.40506	3.83251	FTE1_peak_286	chr1_154945257_154945485	SHC1	PBXIP1;PYGO2	CKS1B;FLAD1;LENEP;MIR4258;ZBTB7B
chr1	156736887	156737299	413	156737243	32.51	17.9899	6.38258	13.5051	FTE1_peak_287	chr1_156736887_156737299	PRCC	HDGF;MRPL24	.
chr1	157980619	157980743	125	157980725	10.63	6.54845	4.84491	3.16973	FTE1_peak_288	chr1_157980619_157980743	KIRREL	.	.
chr1	157989406	157989612	207	157989499	32.51	22.4566	8.37713	17.6645	FTE1_peak_289	chr1_157989406_157989612	KIRREL	.	.
chr1	158980191	158980348	158	158980277	10.63	7.06535	5.19114	3.5552	FTE1_peak_290	chr1_158980191_158980348	IFI16	.	.
chr1	159010055	159010360	306	159010173	17.5	14.6345	8.26124	10.362	FTE1_peak_291	chr1_159010055_159010360	IFI16	.	AIM2
chr1	159567976	159568270	295	159568062	15	12.2799	7.11286	8.24545	FTE1_peak_292	chr1_159567976_159568270	.	APCS	.
chr1	159721980	159722111	132	159722035	17.5	14.6345	8.26124	10.362	FTE1_peak_293	chr1_159721980_159722111	.	.	DUSP23
chr1	162508707	162508855	149	162508744	16.25	12.2852	6.97142	8.24545	FTE1_peak_294	chr1_162508707_162508855	.	UHMK1	UAP1
chr1	162602184	162602324	141	162602244	15.63	12.2799	7.39071	8.24545	FTE1_peak_295	chr1_162602184_162602324	DDR2	.	.
chr1	162660752	162660959	208	162660843	13.75	10.1341	6.58664	6.26448	FTE1_peak_296	chr1_162660752_162660959	DDR2	.	.
chr1	162825911	162826298	388	162826222	19.38	17.0303	9.09854	12.5833	FTE1_peak_297	chr1_162825911_162826298	C1orf110	.	.
chr1	162843503	162843721	219	162843614	20.63	10.9285	5.4076	7.01523	FTE1_peak_298	chr1_162843503_162843721	.	C1orf110	.
chr1	162843924	162844049	126	162843961	13.13	10.1341	6.30754	6.26448	FTE1_peak_299	chr1_162843924_162844049	.	C1orf110	.
chr1	163840006	163840304	299	163840209	15.63	12.332	7.42394	8.24545	FTE1_peak_300	chr1_163840006_163840304	.	.	.
chr1	164676512	164676717	206	164676624	18.75	12.1886	6.58497	8.17106	FTE1_peak_301	chr1_164676512_164676717	PBX1	.	.
chr1	164695550	164695737	188	164695661	18.75	15.8213	8.81944	11.4425	FTE1_peak_302	chr1_164695550_164695737	PBX1	.	.
chr1	164717936	164718082	147	164717975	15.63	12.332	7.42394	8.24545	FTE1_peak_303	chr1_164717936_164718082	PBX1	.	LOC100505795
chr1	164736832	164737148	317	164736872	15.63	12.332	7.42394	8.24545	FTE1_peak_304	chr1_164736832_164737148	PBX1	.	LOC100505795
chr1	165868075	165868318	244	165868195	22.51	16.9126	8.17597	12.4956	FTE1_peak_305	chr1_165868075_165868318	UCK2	.	MIR3658
chr1	166913896	166914067	172	166913986	18.75	15.8213	8.81944	11.4425	FTE1_peak_306	chr1_166913896_166914067	ILDR2	.	.
chr1	167635773	167635917	145	167635881	16.88	11.8955	6.97734	7.90252	FTE1_peak_307	chr1_167635773_167635917	RCSD1	.	.
chr1	167718252	167718386	135	167718325	13.75	7.87524	5.13169	4.30678	FTE1_peak_308	chr1_167718252_167718386	MPZL1	.	.
chr1	167761203	167761424	222	167761303	25.63	24.6954	11.8895	19.7748	FTE1_peak_309	chr1_167761203_167761424	.	MPZL1	ADCY10
chr1	167766471	167766595	125	167766513	13.75	7.53305	4.91787	3.98652	FTE1_peak_310	chr1_167766471_167766595	.	MPZL1	ADCY10
chr1	168439014	168439194	181	168439093	17.5	14.6345	8.26124	10.362	FTE1_peak_311	chr1_168439014_168439194	.	.	.
chr1	168452836	168453201	366	168453129	20.01	14.2141	7.00175	9.98737	FTE1_peak_312	chr1_168452836_168453201	.	.	.
chr1	169515419	169515573	155	169515500	13.13	10.1341	6.30754	6.26448	FTE1_peak_313	chr1_169515419_169515573	F5	.	.
chr1	170677306	170677491	186	170677334	11.88	7.16595	5.15125	3.64882	FTE1_peak_314	chr1_170677306_170677491	PRRX1	.	.
chr1	170680847	170680971	125	170680940	13.13	8.24447	5.13762	4.58242	FTE1_peak_315	chr1_170680847_170680971	PRRX1	.	.
chr1	171096711	171096947	237	171096858	23.76	19.1138	9.25467	14.5413	FTE1_peak_316	chr1_171096711_171096947	.	FMO3;MIR1295A	FMO6P
chr1	171763300	171763478	179	171763391	20.01	14.2141	7.00175	9.98737	FTE1_peak_317	chr1_171763300_171763478	METTL13	.	.
chr1	172105214	172105351	138	172105290	19.38	13.1909	6.79336	9.0676	FTE1_peak_318	chr1_172105214_172105351	DNM3	.	DNM3OS;MIR199A2;MIR214;MIR3120
chr1	172291452	172291620	169	172291528	14.38	11.2192	6.86574	7.25339	FTE1_peak_319	chr1_172291452_172291620	DNM3	.	.
chr1	172608079	172608208	130	172608153	21.26	11.7967	5.56389	7.8066	FTE1_peak_320	chr1_172608079_172608208	.	C1orf9	FASLG
chr1	172866961	172867102	142	172867031	23.13	17.4005	8.04369	12.9311	FTE1_peak_321	chr1_172866961_172867102	.	.	.
chr1	172898259	172898384	126	172898331	15	12.332	7.14484	8.24545	FTE1_peak_322	chr1_172898259_172898384	.	.	.
chr1	172924562	172924749	188	172924657	11.25	8.05487	5.47024	4.40147	FTE1_peak_323	chr1_172924562_172924749	.	.	.
chr1	173092245	173092408	164	173092345	17.5	14.6345	8.26124	10.362	FTE1_peak_324	chr1_173092245_173092408	.	.	.
chr1	173238594	173238868	275	173238700	29.38	30.1425	13.5641	24.9673	FTE1_peak_325	chr1_173238594_173238868	LOC100506023	.	.
chr1	173832543	173832917	375	173832763	12.5	6.6833	4.50109	3.28667	FTE1_peak_326	chr1_173832543_173832917	LOC100506046	DARS2	GAS5;SNORD44;SNORD47;SNORD74;SNORD75;SNORD76;SNORD77;SNORD78;SNORD79;SNORD80;SNORD81;ZBTB37
chr1	173836993	173837120	128	173837079	18.13	9.25272	4.78244	5.50444	FTE1_peak_327	chr1_173836993_173837120	GAS5	DARS2;LOC100506046;SNORD44;SNORD47;SNORD74;SNORD75;SNORD76;SNORD77;SNORD78;SNORD79;SNORD80;SNORD81	ZBTB37
chr1	177945499	177945623	125	177945553	13.13	10.1341	6.30754	6.26448	FTE1_peak_328	chr1_177945499_177945623	.	SEC16B	LOC730102
chr1	178207923	178208259	337	178208099	33.76	29.0782	11.5863	23.942	FTE1_peak_329	chr1_178207923_178208259	RASAL2	.	.
chr1	178653978	178654152	175	178654061	22.51	12.6839	5.87648	8.58545	FTE1_peak_330	chr1_178653978_178654152	.	MIR4424	.
chr1	179777365	179777553	189	179777468	16.25	10.2104	5.72756	6.33704	FTE1_peak_331	chr1_179777365_179777553	FAM163A	.	.
chr1	179997237	179997444	208	179997429	11.88	7.16595	5.15125	3.64882	FTE1_peak_332	chr1_179997237_179997444	CEP350	.	.
chr1	180120716	180120959	244	180120838	26.26	19.5895	8.45175	14.9658	FTE1_peak_333	chr1_180120716_180120959	.	.	QSOX1
chr1	181081653	181081802	150	181081730	12.5	9.03697	6.00146	5.33408	FTE1_peak_334	chr1_181081653_181081802	.	IER5	.
chr1	182925453	182925612	160	182925544	18.13	9.77195	5.05076	5.98585	FTE1_peak_335	chr1_182925453_182925612	.	SHCBP1L	.
chr1	182959726	182959896	171	182959805	20.63	18.2604	9.65674	13.7189	FTE1_peak_336	chr1_182959726_182959896	.	.	.
chr1	183213722	183213896	175	183213783	22.51	12.6839	5.87648	8.58545	FTE1_peak_337	chr1_183213722_183213896	LAMC2	.	NMNAT2
chr1	183241541	183241717	177	183241642	16.88	12.1714	7.15177	8.16651	FTE1_peak_338	chr1_183241541_183241717	NMNAT2	LAMC2	.
chr1	183249082	183249259	178	183249184	23.13	17.4005	8.04369	12.9311	FTE1_peak_339	chr1_183249082_183249259	NMNAT2	.	.
chr1	183601330	183601475	146	183601423	23.13	13.5895	6.03277	9.39325	FTE1_peak_340	chr1_183601330_183601475	ARPC5	.	APOBEC4;RGL1
chr1	183811675	183811926	252	183811794	34.38	37.2686	15.7969	31.8188	FTE1_peak_341	chr1_183811675_183811926	RGL1	.	.
chr1	184026078	184026570	493	184026229	23.76	22.0676	11.0522	17.2871	FTE1_peak_342	chr1_184026078_184026570	TSEN15	GLT25D2	.
chr1	184091009	184091164	156	184091093	15	8.60175	4.92429	4.91809	FTE1_peak_343	chr1_184091009_184091164	.	.	.
chr1	184268708	184268880	173	184268719	11.88	8.05487	5.74934	4.40147	FTE1_peak_344	chr1_184268708_184268880	.	.	.
chr1	184761821	184762010	190	184761924	12.5	8.54894	5.68559	4.86724	FTE1_peak_345	chr1_184761821_184762010	FAM129A	.	.
chr1	184836202	184836528	327	184836424	20.01	8.71601	4.20105	5.02614	FTE1_peak_346	chr1_184836202_184836528	FAM129A	.	.
chr1	185410776	185411045	270	185410936	23.13	22.0676	10.7731	17.2871	FTE1_peak_347	chr1_185410776_185411045	.	.	.
chr1	185534601	185534773	173	185534696	18.13	15.8213	8.54034	11.4425	FTE1_peak_348	chr1_185534601_185534773	.	.	.
chr1	185940874	185941069	196	185940969	15	12.332	7.14484	8.24545	FTE1_peak_349	chr1_185940874_185941069	HMCN1	.	.
chr1	185942917	185943046	130	185942986	13.13	10.1341	6.30754	6.26448	FTE1_peak_350	chr1_185942917_185943046	HMCN1	.	.
chr1	186152495	186152619	125	186152551	13.75	10.1341	6.58664	6.26448	FTE1_peak_351	chr1_186152495_186152619	HMCN1;MIR548F1	.	.
chr1	186762207	186762399	193	186762216	11.25	8.05487	5.47024	4.40147	FTE1_peak_352	chr1_186762207_186762399	.	.	.
chr1	186970803	186970963	161	186970870	17.5	14.6345	8.26124	10.362	FTE1_peak_353	chr1_186970803_186970963	.	PLA2G4A	.
chr1	192454921	192455300	380	192455115	16.88	13.4709	7.98214	9.27938	FTE1_peak_354	chr1_192454921_192455300	.	.	.
chr1	192528715	192528897	183	192528800	16.88	13.4709	7.98214	9.27938	FTE1_peak_355	chr1_192528715_192528897	.	.	RGS1
chr1	192671436	192671608	173	192671522	23.76	22.0676	11.0522	17.2871	FTE1_peak_356	chr1_192671436_192671608	.	.	.
chr1	193080832	193080958	127	193080886	16.88	12.1714	7.15177	8.16651	FTE1_peak_357	chr1_193080832_193080958	.	GLRX2;TROVE2	CDC73;MIR1278
chr1	193305168	193305329	162	193305208	15	12.2158	7.07356	8.19737	FTE1_peak_358	chr1_193305168_193305329	.	.	.
chr1	198227758	198227898	141	198227781	14.38	10.6003	6.47527	6.70108	FTE1_peak_359	chr1_198227758_198227898	NEK7	.	.
chr1	198462046	198462278	233	198462154	22.51	17.3536	8.43261	12.9001	FTE1_peak_360	chr1_198462046_198462278	.	.	.
chr1	198626946	198627098	153	198627016	19.38	17.0303	9.09854	12.5833	FTE1_peak_361	chr1_198626946_198627098	PTPRC	.	.
chr1	198638242	198638508	267	198638365	26.26	20.7457	9.08563	16.0681	FTE1_peak_362	chr1_198638242_198638508	PTPRC	.	.
chr1	198745859	198746056	198	198745933	17.5	14.6345	8.26124	10.362	FTE1_peak_363	chr1_198745859_198746056	.	PTPRC	.
chr1	198850399	198850678	280	198850484	16.88	10.2513	5.95981	6.36151	FTE1_peak_364	chr1_198850399_198850678	LOC100131234	MIR181A1;MIR181B1	.
chr1	198904816	198904941	126	198904895	15	12.332	7.14484	8.24545	FTE1_peak_365	chr1_198904816_198904941	LOC100131234	.	.
chr1	199092769	199092950	182	199092864	16.25	13.4709	7.70304	9.27938	FTE1_peak_366	chr1_199092769_199092950	.	.	.
chr1	199241917	199242090	174	199242040	13.13	9.08114	5.65138	5.34078	FTE1_peak_367	chr1_199241917_199242090	.	.	.
chr1	199711820	199712005	186	199711911	20.01	18.1908	9.33567	13.6971	FTE1_peak_368	chr1_199711820_199712005	.	.	.
chr1	200283634	200283797	164	200283677	18.75	15.8213	8.81944	11.4425	FTE1_peak_369	chr1_200283634_200283797	.	.	C1orf98
chr1	200385144	200385306	163	200385207	15.63	10.0131	5.9656	6.21986	FTE1_peak_370	chr1_200385144_200385306	.	ZNF281	.
chr1	201521128	201521259	132	201521179	16.88	10.2513	5.95981	6.36151	FTE1_peak_371	chr1_201521128_201521259	.	.	.
chr1	201562553	201562854	302	201562767	18.75	14.231	7.82373	10.0035	FTE1_peak_372	chr1_201562553_201562854	.	.	.
chr1	201594246	201594378	133	201594298	11.88	6.21187	4.51864	2.85016	FTE1_peak_373	chr1_201594246_201594378	.	.	NAV1
chr1	201679236	201679362	127	201679294	13.75	7.53305	4.91787	3.98652	FTE1_peak_374	chr1_201679236_201679362	NAV1	.	.
chr1	201720139	201720451	313	201720251	25.63	19.6141	8.87724	14.9783	FTE1_peak_375	chr1_201720139_201720451	NAV1	.	.
chr1	201721870	201722088	219	201721904	10.63	6.51091	4.81981	3.13326	FTE1_peak_376	chr1_201721870_201722088	NAV1	.	.
chr1	201743673	201743863	191	201743860	13.13	5.46828	3.53211	2.2132	FTE1_peak_377	chr1_201743673_201743863	NAV1	.	.
chr1	202250537	202250700	164	202250625	18.13	15.8213	8.54034	11.4425	FTE1_peak_378	chr1_202250537_202250700	LGR6	.	.
chr1	202558471	202558635	165	202558541	18.75	14.9541	8.27431	10.6727	FTE1_peak_379	chr1_202558471_202558635	.	PPP1R12B	SYT2
chr1	202584800	202584940	141	202584850	18.13	11.3193	5.88608	7.35029	FTE1_peak_380	chr1_202584800_202584940	SYT2	PPP1R12B	.
chr1	203527410	203527690	281	203527569	27.51	24.3497	10.9118	19.4747	FTE1_peak_381	chr1_203527410_203527690	.	.	.
chr1	203643438	203643577	140	203643482	13.13	9.08114	5.65138	5.34078	FTE1_peak_382	chr1_203643438_203643577	ATP2B4	.	.
chr1	203858154	203858314	161	203858232	18.75	13.1878	7.18361	9.0676	FTE1_peak_383	chr1_203858154_203858314	.	SNRPE	.
chr1	203858567	203858794	228	203858679	22.51	18.4559	9.08441	13.9089	FTE1_peak_384	chr1_203858567_203858794	.	SNRPE	.
chr1	204140866	204141139	274	204140943	20.63	18.1908	9.61352	13.6971	FTE1_peak_385	chr1_204140866_204141139	.	ETNK2;REN	GOLT1A;KISS1
chr1	204167879	204168058	180	204167969	15	8.80691	5.04061	5.11424	FTE1_peak_386	chr1_204167879_204168058	GOLT1A	KISS1	PLEKHA6
chr1	204263644	204263791	148	204263700	17.5	13.6228	7.63076	9.42607	FTE1_peak_387	chr1_204263644_204263791	PLEKHA6	.	.
chr1	204288736	204288868	133	204288787	13.75	10.1341	6.58664	6.26448	FTE1_peak_388	chr1_204288736_204288868	PLEKHA6	.	.
chr1	205267735	205267868	134	205267752	13.13	7.18398	4.50309	3.66656	FTE1_peak_389	chr1_205267735_205267868	.	TMCC2	NUAK2
chr1	205858939	205859125	187	205859018	16.88	13.4709	7.98214	9.27938	FTE1_peak_390	chr1_205858939_205859125	LOC284581	.	SLC26A9
chr1	207180835	207180995	161	207180914	17.5	14.5754	8.22426	10.3316	FTE1_peak_391	chr1_207180835_207180995	.	.	C1orf116
chr1	208380946	208381100	155	208381008	14.38	11.2192	6.86574	7.25339	FTE1_peak_392	chr1_208380946_208381100	PLXNA2	.	.
chr1	208428352	208428616	265	208428403	17.5	5.26629	3.0841	2.02754	FTE1_peak_393	chr1_208428352_208428616	.	PLXNA2	.
chr1	209562683	209562845	163	209562772	13.13	10.1341	6.30754	6.26448	FTE1_peak_394	chr1_209562683_209562845	.	.	.
chr1	209583154	209583450	297	209583255	16.88	10.6769	6.21893	6.77222	FTE1_peak_395	chr1_209583154_209583450	.	.	MIR205;MIR205HG
chr1	210013313	210013440	128	210013368	15.63	12.332	7.42394	8.24545	FTE1_peak_396	chr1_210013313_210013440	DIEXF	.	.
chr1	210361701	210361850	150	210361779	18.75	15.7587	8.77997	11.4346	FTE1_peak_397	chr1_210361701_210361850	.	SYT14	.
chr1	210412744	210413050	307	210412798	18.75	12.1886	6.58497	8.17106	FTE1_peak_398	chr1_210412744_210413050	SERTAD4	C1orf133	.
chr1	210546397	210547656	1260	210547087	41.26	39.3523	14.0869	33.8439	FTE1_peak_399	chr1_210546397_210547656	HHAT	.	.
chr1	210567065	210567250	186	210567143	19.38	17.0303	9.09854	12.5833	FTE1_peak_400	chr1_210567065_210567250	HHAT	.	.
chr1	210612385	210612884	500	210612729	22.51	20.7799	10.494	16.0826	FTE1_peak_401	chr1_210612385_210612884	HHAT	.	.
chr1	210771657	210772098	442	210771762	20.01	18.2604	9.37764	13.7189	FTE1_peak_402	chr1_210771657_210772098	HHAT	.	.
chr1	211725050	211725175	126	211725155	15.63	9.31879	5.54303	5.55219	FTE1_peak_403	chr1_211725050_211725175	.	.	SLC30A1
chr1	212091360	212091505	146	212091459	20.63	14.2141	7.21014	9.98737	FTE1_peak_404	chr1_212091360_212091505	.	.	INTS7
chr1	212769600	212769724	125	212769668	17.5	14.6345	8.26124	10.362	FTE1_peak_405	chr1_212769600_212769724	ATF3	.	FAM71A
chr1	212840896	212841038	143	212840983	16.25	13.2794	7.58429	9.152	FTE1_peak_406	chr1_212840896_212841038	.	.	BATF3
chr1	212841314	212841438	125	212841385	11.88	7.83221	5.59918	4.26561	FTE1_peak_407	chr1_212841314_212841438	.	.	BATF3
chr1	214470506	214470649	144	214470547	12.5	9.07861	6.02844	5.34078	FTE1_peak_408	chr1_214470506_214470649	SMYD2	.	.
chr1	214551441	214551586	146	214551544	16.88	7.66459	4.46986	4.10596	FTE1_peak_409	chr1_214551441_214551586	PTPN14	.	.
chr1	214577592	214577734	143	214577635	15	12.332	7.14484	8.24545	FTE1_peak_410	chr1_214577592_214577734	PTPN14	.	.
chr1	214595491	214595698	208	214595591	16.25	12.825	7.30339	8.71857	FTE1_peak_411	chr1_214595491_214595698	PTPN14	.	.
chr1	214601316	214601497	182	214601375	14.38	10.5464	6.44137	6.65054	FTE1_peak_412	chr1_214601316_214601497	PTPN14	.	.
chr1	214619431	214619586	156	214619468	10.63	7.06535	5.19114	3.5552	FTE1_peak_413	chr1_214619431_214619586	PTPN14	.	.
chr1	214620510	214620663	154	214620604	15.63	12.332	7.42394	8.24545	FTE1_peak_414	chr1_214620510_214620663	PTPN14	.	.
chr1	214650391	214650543	153	214650446	19.38	16.9642	9.05782	12.5428	FTE1_peak_415	chr1_214650391_214650543	PTPN14	.	.
chr1	215011714	215012021	308	215011795	21.88	19.5105	10.2149	14.8878	FTE1_peak_416	chr1_215011714_215012021	.	.	.
chr1	215016177	215016621	445	215016319	29.38	30.1425	13.5641	24.9673	FTE1_peak_417	chr1_215016177_215016621	.	.	.
chr1	215038314	215038563	250	215038469	21.88	19.5105	10.2149	14.8878	FTE1_peak_418	chr1_215038314_215038563	.	.	.
chr1	215073615	215073762	148	215073695	16.25	13.4709	7.70304	9.27938	FTE1_peak_419	chr1_215073615_215073762	.	.	.
chr1	215130704	215130902	199	215130813	21.26	19.5105	9.93584	14.8878	FTE1_peak_420	chr1_215130704_215130902	.	.	.
chr1	215131080	215131305	226	215131199	10.63	7.06535	5.19114	3.5552	FTE1_peak_421	chr1_215131080_215131305	.	.	.
chr1	215131624	215131756	133	215131708	13.75	10.1341	6.58664	6.26448	FTE1_peak_422	chr1_215131624_215131756	.	.	.
chr1	215164056	215164256	201	215164158	21.88	18.5786	9.634	14.0206	FTE1_peak_423	chr1_215164056_215164256	.	.	KCNK2
chr1	215175645	215176071	427	215175900	28.13	28.7582	13.0059	23.6384	FTE1_peak_424	chr1_215175645_215176071	.	.	KCNK2
chr1	215225993	215226117	125	215226058	11.88	8.05487	5.74934	4.40147	FTE1_peak_425	chr1_215225993_215226117	KCNK2	.	.
chr1	215649173	215649396	224	215649262	25.01	24.6954	11.6104	19.7748	FTE1_peak_426	chr1_215649173_215649396	.	.	.
chr1	215649589	215649848	260	215649800	16.25	12.7627	7.26495	8.65829	FTE1_peak_427	chr1_215649589_215649848	.	.	.
chr1	215922898	215923028	131	215922938	16.88	13.4709	7.98214	9.27938	FTE1_peak_428	chr1_215922898_215923028	USH2A	.	.
chr1	216637883	216638110	228	216637963	13.75	10.089	6.55716	6.26448	FTE1_peak_429	chr1_216637883_216638110	.	.	.
chr1	218382925	218383113	189	218383036	15.63	9.31879	5.54303	5.55219	FTE1_peak_430	chr1_218382925_218383113	.	.	.
chr1	218550731	218550908	178	218550798	18.75	15.8213	8.81944	11.4425	FTE1_peak_431	chr1_218550731_218550908	TGFB2	.	.
chr1	218653682	218653900	219	218653781	28.13	23.0554	9.71079	18.2388	FTE1_peak_432	chr1_218653682_218653900	.	.	.
chr1	218669986	218670204	219	218670087	15.63	12.332	7.42394	8.24545	FTE1_peak_433	chr1_218669986_218670204	.	.	.
chr1	218672009	218672189	181	218672085	20.01	18.2604	9.37764	13.7189	FTE1_peak_434	chr1_218672009_218672189	.	.	.
chr1	218701299	218701441	143	218701399	15.63	12.332	7.42394	8.24545	FTE1_peak_435	chr1_218701299_218701441	.	.	.
chr1	218847897	218848159	263	218848084	17.5	14.6345	8.26124	10.362	FTE1_peak_436	chr1_218847897_218848159	.	.	.
chr1	218879270	218880130	861	218879725	30.01	31.5411	13.8432	26.2995	FTE1_peak_437	chr1_218879270_218880130	.	.	.
chr1	218996631	218996958	328	218996709	20.63	14.7511	7.52362	10.4747	FTE1_peak_438	chr1_218996631_218996958	.	.	.
chr1	219047724	219047900	177	219047838	14.38	11.2192	6.86574	7.25339	FTE1_peak_439	chr1_219047724_219047900	.	.	.
chr1	220174485	220174613	129	220174542	13.75	10.1341	6.58664	6.26448	FTE1_peak_440	chr1_220174485_220174613	EPRS;RNU5F-1	.	.
chr1	221130684	221130862	179	221130767	15.63	9.31879	5.54303	5.55219	FTE1_peak_441	chr1_221130684_221130862	.	.	.
chr1	221271129	221271724	596	221271207	21.88	11.7967	5.72019	7.8066	FTE1_peak_442	chr1_221271129_221271724	.	.	.
chr1	221508619	221508759	141	221508716	23.13	21.9875	10.7249	17.2461	FTE1_peak_443	chr1_221508619_221508759	C1orf140	.	.
chr1	221613368	221613597	230	221613491	23.76	22.0676	11.0522	17.2871	FTE1_peak_444	chr1_221613368_221613597	.	.	.
chr1	221891867	221892310	444	221892008	43.14	29.6308	8.82726	24.4811	FTE1_peak_445	chr1_221891867_221892310	DUSP10	.	.
chr1	222042388	222042580	193	222042490	25.01	24.6954	11.6104	19.7748	FTE1_peak_446	chr1_222042388_222042580	.	.	.
chr1	222065168	222065370	203	222065266	21.88	15.2574	7.62691	10.9537	FTE1_peak_447	chr1_222065168_222065370	.	.	.
chr1	222131599	222131793	195	222131686	13.13	10.1341	6.30754	6.26448	FTE1_peak_448	chr1_222131599_222131793	.	.	.
chr1	222135435	222135695	261	222135603	15.63	12.332	7.42394	8.24545	FTE1_peak_449	chr1_222135435_222135695	.	.	.
chr1	223403495	223403760	266	223403606	13.13	9.81751	6.1096	6.02978	FTE1_peak_450	chr1_223403495_223403760	SUSD4	.	.
chr1	223894952	223895246	295	223895099	20.01	11.9918	5.79455	7.99606	FTE1_peak_451	chr1_223894952_223895246	CAPN2	.	.
chr1	224075854	224076063	210	224076060	13.75	5.46828	3.6884	2.2132	FTE1_peak_452	chr1_224075854_224076063	.	.	.
chr1	224235313	224235535	223	224235432	24.38	22.3067	10.6869	17.5182	FTE1_peak_453	chr1_224235313_224235535	.	.	.
chr1	224253280	224253438	159	224253382	20.01	18.2604	9.37764	13.7189	FTE1_peak_454	chr1_224253280_224253438	.	.	.
chr1	224267907	224268031	125	224268001	13.75	10.1341	6.58664	6.26448	FTE1_peak_455	chr1_224267907_224268031	.	.	.
chr1	224730597	224730738	142	224730694	16.25	13.4709	7.70304	9.27938	FTE1_peak_456	chr1_224730597_224730738	.	.	.
chr1	224752880	224753044	165	224752998	22.51	16.3197	7.8353	11.9212	FTE1_peak_457	chr1_224752880_224753044	.	.	.
chr1	225879716	225879840	125	225879765	15	12.332	7.14484	8.24545	FTE1_peak_458	chr1_225879716_225879840	.	.	.
chr1	225887961	225888292	332	225888048	18.13	12.1886	6.37659	8.17106	FTE1_peak_459	chr1_225887961_225888292	.	.	.
chr1	226285719	226285876	158	226285805	18.13	15.1648	8.14032	10.8751	FTE1_peak_460	chr1_226285719_226285876	.	H3F3A;H3F3AP4	.
chr1	229038913	229039059	147	229038975	14.38	10.6003	6.47527	6.70108	FTE1_peak_461	chr1_229038913_229039059	.	.	.
chr1	229327897	229328073	177	229328006	21.26	19.5105	9.93584	14.8878	FTE1_peak_462	chr1_229327897_229328073	.	.	.
chr1	230240471	230240751	281	230240638	16.88	13.4709	7.98214	9.27938	FTE1_peak_463	chr1_230240471_230240751	GALNT2	.	.
chr1	230276739	230276920	182	230276829	12.5	8.45722	5.62637	4.77994	FTE1_peak_464	chr1_230276739_230276920	GALNT2	.	.
chr1	230985712	230985862	151	230985801	12.5	9.07861	6.02844	5.34078	FTE1_peak_465	chr1_230985712_230985862	C1orf198	.	.
chr1	231275809	231275983	175	231275915	15.63	11.5534	6.92879	7.57923	FTE1_peak_466	chr1_231275809_231275983	.	.	TRIM67
chr1	231276144	231276360	217	231276238	17.5	13.4971	7.5529	9.30511	FTE1_peak_467	chr1_231276144_231276360	.	.	TRIM67
chr1	231963141	231963426	286	231963242	51.89	44.374	13.2221	38.725	FTE1_peak_468	chr1_231963141_231963426	DISC1;TSNAX-DISC1	DISC2	.
chr1	231964045	231964181	137	231964104	15	12.332	7.14484	8.24545	FTE1_peak_469	chr1_231964045_231964181	DISC1;TSNAX-DISC1	DISC2	.
chr1	232674371	232674534	164	232674446	13.13	10.1341	6.30754	6.26448	FTE1_peak_470	chr1_232674371_232674534	.	SIPA1L2	.
chr1	233027044	233027226	183	233027133	16.88	10.2513	5.95981	6.36151	FTE1_peak_471	chr1_233027044_233027226	.	.	.
chr1	233248698	233248957	260	233248864	25.01	24.3951	11.4315	19.5182	FTE1_peak_472	chr1_233248698_233248957	PCNXL2	.	.
chr1	233249120	233249387	268	233249161	15	9.31879	5.33465	5.55219	FTE1_peak_473	chr1_233249120_233249387	PCNXL2	.	.
chr1	234641520	234641871	352	234641599	18.75	15.8213	8.81944	11.4425	FTE1_peak_474	chr1_234641520_234641871	.	TARBP1	LOC100506795
chr1	234659334	234659565	232	234659483	16.88	13.0807	7.73165	8.96776	FTE1_peak_475	chr1_234659334_234659565	.	.	LOC100506795
chr1	234700415	234700736	322	234700578	16.25	13.4709	7.70304	9.27938	FTE1_peak_476	chr1_234700415_234700736	.	.	.
chr1	235061457	235061606	150	235061517	10	5.33974	3.827	2.09548	FTE1_peak_477	chr1_235061457_235061606	.	.	.
chr1	235061798	235061951	154	235061866	17.5	14.4308	8.13389	10.1931	FTE1_peak_478	chr1_235061798_235061951	.	.	.
chr1	235106880	235107075	196	235106926	15	9.31879	5.33465	5.55219	FTE1_peak_479	chr1_235106880_235107075	.	.	.
chr1	236162760	236162978	219	236162855	13.13	9.55984	5.94882	5.78139	FTE1_peak_480	chr1_236162760_236162978	NID1	.	.
chr1	237068557	237068811	255	237068615	15	12.332	7.14484	8.24545	FTE1_peak_481	chr1_237068557_237068811	.	MTR	.
chr1	238572581	238572754	174	238572688	18.75	15.8213	8.81944	11.4425	FTE1_peak_482	chr1_238572581_238572754	.	.	.
chr1	238844960	238845088	129	238845029	13.13	9.21998	5.73744	5.47544	FTE1_peak_483	chr1_238844960_238845088	.	.	.
chr1	240078279	240078490	212	240078383	14.38	11.2192	6.86574	7.25339	FTE1_peak_484	chr1_240078279_240078490	.	CHRM3	.
chr1	240102327	240102645	319	240102538	16.25	10.2513	5.75142	6.36151	FTE1_peak_485	chr1_240102327_240102645	.	CHRM3	.
chr1	240194458	240194613	156	240194571	18.75	12.1886	6.58497	8.17106	FTE1_peak_486	chr1_240194458_240194613	.	RPS7P5	.
chr1	240194830	240195034	205	240194933	14.38	11.2192	6.86574	7.25339	FTE1_peak_487	chr1_240194830_240195034	.	RPS7P5	.
chr1	240406265	240406513	249	240406402	26.26	25.832	12.0472	20.8752	FTE1_peak_488	chr1_240406265_240406513	FMN2	.	.
chr1	240408724	240408879	156	240408793	18.75	7.28745	3.95098	3.76508	FTE1_peak_489	chr1_240408724_240408879	FMN2	.	.
chr1	240514309	240514613	305	240514459	18.13	15.8213	8.54034	11.4425	FTE1_peak_490	chr1_240514309_240514613	FMN2	.	.
chr1	240549811	240549948	138	240549875	15.63	11.9663	7.19096	7.97128	FTE1_peak_491	chr1_240549811_240549948	FMN2	.	.
chr1	240577071	240577476	406	240577267	13.13	9.03572	5.62326	5.33408	FTE1_peak_492	chr1_240577071_240577476	FMN2	.	.
chr1	240929085	240929241	157	240929179	13.75	8.05624	5.24573	4.40273	FTE1_peak_493	chr1_240929085_240929241	.	.	RGS7
chr1	240967858	240968066	209	240967947	25.01	12.6201	5.20131	8.52686	FTE1_peak_494	chr1_240967858_240968066	RGS7	.	.
chr1	240994584	240994760	177	240994653	22.51	20.7799	10.494	16.0826	FTE1_peak_495	chr1_240994584_240994760	RGS7	.	.
chr1	241646052	241646624	573	241646281	21.26	19.5105	9.93584	14.8878	FTE1_peak_496	chr1_241646052_241646624	.	.	FH
chr1	241776058	241776230	173	241776137	15	12.0277	6.95823	8.03015	FTE1_peak_497	chr1_241776058_241776230	OPN3	KMO	CHML
chr1	241858879	241859019	141	241858959	20.01	14.2141	7.00175	9.98737	FTE1_peak_498	chr1_241858879_241859019	WDR64	.	.
chr1	241870467	241870591	125	241870479	12.5	6.39088	4.32105	3.01969	FTE1_peak_499	chr1_241870467_241870591	WDR64	.	.
chr1	241879331	241879557	227	241879443	20.63	18.2604	9.65674	13.7189	FTE1_peak_500	chr1_241879331_241879557	WDR64	.	.
chr1	243713627	243713889	263	243713821	16.88	9.48359	5.50136	5.71155	FTE1_peak_501	chr1_243713627_243713889	AKT3	.	.
chr1	243759673	243759983	311	243759873	35.01	31.578	12.0031	26.3283	FTE1_peak_502	chr1_243759673_243759983	AKT3	.	.
chr1	243882160	243882580	421	243882389	24.38	23.373	11.3313	18.5309	FTE1_peak_503	chr1_243882160_243882580	AKT3	.	.
chr1	243966912	243967039	128	243966953	15	11.1147	6.40158	7.19278	FTE1_peak_504	chr1_243966912_243967039	AKT3	.	.
chr1	244090151	244090524	374	244090384	23.13	19.4841	9.23677	14.8878	FTE1_peak_505	chr1_244090151_244090524	LOC339529	.	.
chr1	244267651	244267924	274	244267738	21.88	19.2586	10.0575	14.683	FTE1_peak_506	chr1_244267651_244267924	.	.	.
chr1	245249817	245249957	141	245249855	14.38	11.2192	6.86574	7.25339	FTE1_peak_507	chr1_245249817_245249957	EFCAB2	.	.
chr1	246044443	246044572	130	246044515	13.13	10.1341	6.30754	6.26448	FTE1_peak_508	chr1_246044443_246044572	SMYD3	.	.
chr1	246168483	246168611	129	246168562	17.5	12.1499	6.72894	8.1493	FTE1_peak_509	chr1_246168483_246168611	SMYD3	.	.
chr1	246303075	246303199	125	246303112	11.88	8.05487	5.74934	4.40147	FTE1_peak_510	chr1_246303075_246303199	SMYD3	.	.
chr1	246598956	246599170	215	246599055	24.38	23.373	11.3313	18.5309	FTE1_peak_511	chr1_246598956_246599170	SMYD3	.	.
chr1	249115389	249115745	357	249115475	21.26	18.8272	9.5211	14.2622	FTE1_peak_512	chr1_249115389_249115745	SH3BP5L	.	MIR3124;ZNF672;ZNF692
chr1	249221042	249221275	234	249221137	13.13	5.46828	3.53211	2.2132	FTE1_peak_513	chr1_249221042_249221275	.	PGBD2	.
chr10	3137695	3137819	125	3137792	12.5	7.592	5.07165	4.03932	FTE1_peak_514	chr10_3137695_3137819	PFKP	.	.
chr10	3239930	3240114	185	3239930	12.5	5.3969	3.72504	2.14758	FTE1_peak_515	chr10_3239930_3240114	.	PITRM1	.
chr10	3270185	3270390	206	3270193	16.88	5.94584	3.57589	2.64709	FTE1_peak_516	chr10_3270185_3270390	.	.	.
chr10	3494510	3494645	136	3494566	13.13	10.0335	6.24462	6.23896	FTE1_peak_517	chr10_3494510_3494645	.	.	.
chr10	3510397	3510692	296	3510483	21.88	16.8172	8.55355	12.4023	FTE1_peak_518	chr10_3510397_3510692	.	.	.
chr10	3806199	3806333	135	3806224	11.88	7.16595	5.15125	3.64882	FTE1_peak_519	chr10_3806199_3806333	.	.	KLF6
chr10	3817128	3817522	395	3817214	15	12.332	7.14484	8.24545	FTE1_peak_520	chr10_3817128_3817522	.	.	KLF6
chr10	3817655	3818105	451	3817776	19.38	17.0303	9.09854	12.5833	FTE1_peak_521	chr10_3817655_3818105	.	.	KLF6
chr10	3818535	3818697	163	3818538	11.88	5.86499	4.29271	2.57335	FTE1_peak_522	chr10_3818535_3818697	KLF6	.	.
chr10	3847491	3847710	220	3847604	15	9.47442	5.42506	5.70353	FTE1_peak_523	chr10_3847491_3847710	.	KLF6	.
chr10	4284152	4284319	168	4284272	15	11.1147	6.40158	7.19278	FTE1_peak_524	chr10_4284152_4284319	.	.	.
chr10	4285938	4286179	242	4286043	15	9.31879	5.33465	5.55219	FTE1_peak_525	chr10_4285938_4286179	.	.	.
chr10	4569938	4570111	174	4570005	18.13	15.8213	8.54034	11.4425	FTE1_peak_526	chr10_4569938_4570111	.	.	.
chr10	4719941	4720123	183	4720052	11.88	8.05487	5.74934	4.40147	FTE1_peak_527	chr10_4719941_4720123	LOC100216001	LOC338588	.
chr10	4746570	4746732	163	4746652	18.75	15.6056	8.68348	11.2885	FTE1_peak_528	chr10_4746570_4746732	.	LOC100216001	.
chr10	4813635	4813787	153	4813720	15	12.332	7.14484	8.24545	FTE1_peak_529	chr10_4813635_4813787	.	.	.
chr10	4850513	4850640	128	4850541	15.63	11.8454	7.11405	7.85334	FTE1_peak_530	chr10_4850513_4850640	.	.	AKR1E2
chr10	5601926	5602064	139	5602037	18.13	9.34116	4.8277	5.5743	FTE1_peak_531	chr10_5601926_5602064	.	.	.
chr10	6791069	6791300	232	6791190	18.13	15.8213	8.54034	11.4425	FTE1_peak_532	chr10_6791069_6791300	.	.	.
chr10	8111765	8111925	161	8111825	16.25	10.7658	6.05413	6.85929	FTE1_peak_533	chr10_8111765_8111925	GATA3	FLJ45983	.
chr10	8744698	8744928	231	8744810	11.88	8.05487	5.74934	4.40147	FTE1_peak_534	chr10_8744698_8744928	.	.	.
chr10	9054385	9054748	364	9054459	18.13	15.8213	8.54034	11.4425	FTE1_peak_535	chr10_9054385_9054748	.	.	.
chr10	9060180	9060448	269	9060381	12.5	9.07861	6.02844	5.34078	FTE1_peak_536	chr10_9060180_9060448	.	.	.
chr10	9331878	9332112	235	9331998	19.38	17.0303	9.09854	12.5833	FTE1_peak_537	chr10_9331878_9332112	.	.	.
chr10	9804950	9805318	369	9805081	33.13	35.8175	15.2387	30.4096	FTE1_peak_538	chr10_9804950_9805318	.	.	.
chr10	10828117	10828243	127	10828158	14.38	11.2192	6.86574	7.25339	FTE1_peak_539	chr10_10828117_10828243	SFTA1P	.	.
chr10	10828411	10828622	212	10828490	20.01	14.2141	7.00175	9.98737	FTE1_peak_540	chr10_10828411_10828622	SFTA1P	.	.
chr10	10847414	10847542	129	10847456	15.63	6.9063	4.15728	3.49389	FTE1_peak_541	chr10_10847414_10847542	.	SFTA1P	.
chr10	10866494	10866751	258	10866651	18.13	13.748	7.28753	9.54549	FTE1_peak_542	chr10_10866494_10866751	.	SFTA1P	.
chr10	12490771	12490910	140	12490807	15	10.6093	6.09674	6.70697	FTE1_peak_543	chr10_12490771_12490910	CAMK1D	.	.
chr10	12749720	12749855	136	12749771	13.13	10.1341	6.30754	6.26448	FTE1_peak_544	chr10_12749720_12749855	CAMK1D	.	.
chr10	13908069	13908431	363	13908341	26.26	20.7457	9.08563	16.0681	FTE1_peak_545	chr10_13908069_13908431	FRMD4A	.	.
chr10	13924102	13924364	263	13924199	17.5	6.60524	3.70092	3.22475	FTE1_peak_546	chr10_13924102_13924364	FRMD4A	.	.
chr10	14003235	14003359	125	14003280	13.13	10.1341	6.30754	6.26448	FTE1_peak_547	chr10_14003235_14003359	FRMD4A	.	.
chr10	15242706	15243047	342	15242821	26.88	24.6773	11.6175	19.7748	FTE1_peak_548	chr10_15242706_15243047	.	.	FAM171A1
chr10	15527957	15528226	270	15528082	19.38	6.46191	3.39668	3.08591	FTE1_peak_549	chr10_15527957_15528226	.	.	.
chr10	17101104	17101549	446	17101324	12.5	9.07861	6.02844	5.34078	FTE1_peak_550	chr10_17101104_17101549	CUBN	.	.
chr10	17260051	17260204	154	17260130	13.13	10.1341	6.30754	6.26448	FTE1_peak_551	chr10_17260051_17260204	.	TRDMT1	VIM
chr10	17279908	17281032	1125	17280236	30.01	25.4237	10.336	20.4783	FTE1_peak_552	chr10_17279908_17281032	.	VIM	.
chr10	17546849	17547054	206	17546950	22.51	20.7799	10.494	16.0826	FTE1_peak_553	chr10_17546849_17547054	.	.	.
chr10	17554546	17554702	157	17554619	15.63	9.31879	5.54303	5.55219	FTE1_peak_554	chr10_17554546_17554702	.	.	.
chr10	18334427	18334569	143	18334506	13.13	10.1341	6.30754	6.26448	FTE1_peak_555	chr10_18334427_18334569	.	SLC39A12	.
chr10	19207429	19207704	276	19207603	15.63	12.332	7.42394	8.24545	FTE1_peak_556	chr10_19207429_19207704	.	.	.
chr10	21291170	21291322	153	21291261	14.38	11.2192	6.86574	7.25339	FTE1_peak_557	chr10_21291170_21291322	NEBL	.	.
chr10	21581745	21581871	127	21581788	19.38	16.6442	8.86091	12.2332	FTE1_peak_558	chr10_21581745_21581871	.	.	.
chr10	21625921	21626055	135	21626009	15	8.94824	5.12126	5.25007	FTE1_peak_559	chr10_21625921_21626055	.	.	.
chr10	22215867	22216161	295	22216044	23.13	22.0676	10.7731	17.2871	FTE1_peak_560	chr10_22215867_22216161	DNAJC1	.	.
chr10	22216549	22216778	230	22216737	11.25	8.05487	5.47024	4.40147	FTE1_peak_561	chr10_22216549_22216778	DNAJC1	.	.
chr10	22535897	22536160	264	22535986	18.13	14.231	7.57614	10.0035	FTE1_peak_562	chr10_22535897_22536160	.	.	LOC100130992
chr10	23640939	23641110	172	23641014	11.88	8.05487	5.74934	4.40147	FTE1_peak_563	chr10_23640939_23641110	.	C10orf67	.
chr10	25147258	25147456	199	25147345	25.01	24.6954	11.6104	19.7748	FTE1_peak_564	chr10_25147258_25147456	PRTFDC1	.	.
chr10	25162265	25162427	163	25162333	19.38	13.1909	6.79336	9.0676	FTE1_peak_565	chr10_25162265_25162427	PRTFDC1	.	.
chr10	25186313	25186525	213	25186441	17.5	14.6345	8.26124	10.362	FTE1_peak_566	chr10_25186313_25186525	PRTFDC1	.	.
chr10	28569780	28569972	193	28569856	26.26	21.4502	9.48066	16.7292	FTE1_peak_567	chr10_28569780_28569972	MPP7	.	.
chr10	28628558	28628745	188	28628643	16.25	13.347	7.62619	9.21742	FTE1_peak_568	chr10_28628558_28628745	.	.	.
chr10	29328768	29329068	301	29328990	11.88	7.78731	5.56892	4.22202	FTE1_peak_569	chr10_29328768_29329068	.	.	.
chr10	29425459	29425639	181	29425526	18.75	15.8213	8.81944	11.4425	FTE1_peak_570	chr10_29425459_29425639	.	.	.
chr10	29429953	29430214	262	29430107	21.26	15.2574	7.41853	10.9537	FTE1_peak_571	chr10_29429953_29430214	.	.	.
chr10	29546284	29546455	172	29546386	13.75	7.53305	4.91787	3.98652	FTE1_peak_572	chr10_29546284_29546455	.	.	.
chr10	29947967	29948261	295	29948076	20.63	14.2141	7.21014	9.98737	FTE1_peak_573	chr10_29947967_29948261	SVIL	.	.
chr10	29948405	29948611	207	29948413	13.13	7.53305	4.70948	3.98652	FTE1_peak_574	chr10_29948405_29948611	SVIL	.	.
chr10	30007918	30008263	346	30008012	30.63	31.4364	14.0591	26.2196	FTE1_peak_575	chr10_30007918_30008263	SVIL	.	.
chr10	30073388	30073540	153	30073455	23.76	14.8257	6.82931	10.5476	FTE1_peak_576	chr10_30073388_30073540	.	.	.
chr10	30238315	30238800	486	30238502	35.63	37.8733	15.8419	32.4118	FTE1_peak_577	chr10_30238315_30238800	.	.	.
chr10	30246896	30247020	125	30246951	13.75	10.1341	6.58664	6.26448	FTE1_peak_578	chr10_30246896_30247020	.	.	.
chr10	30743658	30744031	374	30743750	16.88	7.66459	4.46986	4.10596	FTE1_peak_579	chr10_30743658_30744031	MAP3K8	.	.
chr10	30971476	30971631	156	30971528	13.75	10.1341	6.58664	6.26448	FTE1_peak_580	chr10_30971476_30971631	.	.	.
chr10	31323567	31323748	182	31323652	20.01	11.692	5.63899	7.70758	FTE1_peak_581	chr10_31323567_31323748	.	ZNF438	.
chr10	31550666	31550943	278	31550757	16.25	13.4709	7.70304	9.27938	FTE1_peak_582	chr10_31550666_31550943	.	.	.
chr10	32229848	32230038	191	32229929	21.88	16.8172	8.55355	12.4023	FTE1_peak_583	chr10_32229848_32230038	.	ARHGAP12	.
chr10	32236558	32236755	198	32236646	16.88	12.5194	7.37296	8.42876	FTE1_peak_584	chr10_32236558_32236755	.	ARHGAP12	.
chr10	33271289	33271600	312	33271493	23.76	17.4005	8.25208	12.9311	FTE1_peak_585	chr10_33271289_33271600	.	ITGB1	.
chr10	33355957	33356116	160	33356013	16.88	13.2794	7.85909	9.152	FTE1_peak_586	chr10_33355957_33356116	.	.	.
chr10	33403738	33403958	221	33403838	18.13	7.28745	3.82595	3.76508	FTE1_peak_587	chr10_33403738_33403958	.	.	.
chr10	33505668	33505882	215	33505849	15.63	9.31879	5.54303	5.55219	FTE1_peak_588	chr10_33505668_33505882	NRP1	.	.
chr10	33526815	33527186	372	33527125	16.25	13.4709	7.70304	9.27938	FTE1_peak_589	chr10_33526815_33527186	NRP1	.	.
chr10	33527762	33527896	135	33527816	21.26	19.5105	9.93584	14.8878	FTE1_peak_590	chr10_33527762_33527896	NRP1	.	.
chr10	33553221	33553354	134	33553234	12.5	8.10772	5.40131	4.45061	FTE1_peak_591	chr10_33553221_33553354	NRP1	.	.
chr10	33710760	33710927	168	33710863	16.88	10.2513	5.95981	6.36151	FTE1_peak_592	chr10_33710760_33710927	.	.	.
chr10	34579595	34579840	246	34579745	21.26	19.5105	9.93584	14.8878	FTE1_peak_593	chr10_34579595_34579840	PARD3	.	.
chr10	34845562	34845749	188	34845662	16.25	10.2513	5.75142	6.36151	FTE1_peak_594	chr10_34845562_34845749	PARD3	.	.
chr10	35020899	35021030	132	35020926	18.75	9.25272	4.93873	5.50444	FTE1_peak_595	chr10_35020899_35021030	PARD3	.	.
chr10	35294870	35295148	279	35294965	26.88	23.9101	11.1528	19.0474	FTE1_peak_596	chr10_35294870_35295148	.	.	CUL2
chr10	35347215	35347413	199	35347327	20.01	18.1908	9.33567	13.6971	FTE1_peak_597	chr10_35347215_35347413	CUL2	.	.
chr10	35863945	35864116	172	35864057	11.88	5.86499	4.29271	2.57335	FTE1_peak_598	chr10_35863945_35864116	.	CCNY	.
chr10	36189463	36189597	135	36189507	13.13	10.1341	6.30754	6.26448	FTE1_peak_599	chr10_36189463_36189597	.	.	.
chr10	36461057	36461211	155	36461171	14.38	11.2192	6.86574	7.25339	FTE1_peak_600	chr10_36461057_36461211	.	.	.
chr10	36461662	36461813	152	36461728	15.63	12.332	7.42394	8.24545	FTE1_peak_601	chr10_36461662_36461813	.	.	.
chr10	36897166	36897406	241	36897321	10.63	7.06535	5.19114	3.5552	FTE1_peak_602	chr10_36897166_36897406	.	.	.
chr10	44312379	44312564	186	44312473	14.38	10.336	6.30924	6.44497	FTE1_peak_603	chr10_44312379_44312564	.	HNRNPA3P1	C10orf136
chr10	44312845	44313062	218	44313019	14.38	10.4402	6.37462	6.54696	FTE1_peak_604	chr10_44312845_44313062	.	HNRNPA3P1	C10orf136
chr10	44353099	44353294	196	44353170	18.13	15.8213	8.54034	11.4425	FTE1_peak_605	chr10_44353099_44353294	.	C10orf136	LOC100506835
chr10	44357923	44358091	169	44358032	14.38	10.6003	6.47527	6.70108	FTE1_peak_606	chr10_44357923_44358091	LOC100506835	C10orf136	.
chr10	44359484	44359647	164	44359539	23.13	15.2823	6.89459	10.9781	FTE1_peak_607	chr10_44359484_44359647	LOC100506835	C10orf136	.
chr10	44384158	44384319	162	44384233	13.75	10.1341	6.58664	6.26448	FTE1_peak_608	chr10_44384158_44384319	LOC100506835	.	LOC283033
chr10	44426832	44427014	183	44426926	18.13	11.7396	6.12152	7.75347	FTE1_peak_609	chr10_44426832_44427014	LOC283033	.	.
chr10	44461107	44461346	240	44461175	19.38	16.6442	8.86091	12.2332	FTE1_peak_610	chr10_44461107_44461346	LOC283033	.	.
chr10	45064995	45065260	266	45065141	23.13	17.4005	8.04369	12.9311	FTE1_peak_611	chr10_45064995_45065260	.	.	.
chr10	45248341	45248547	207	45248424	15	12.332	7.14484	8.24545	FTE1_peak_612	chr10_45248341_45248547	.	.	.
chr10	47085595	47085765	171	47085727	21.26	9.38671	4.41798	5.61894	FTE1_peak_613	chr10_47085595_47085765	BMS1P1;BMS1P5;PPYR1;PTPN20A;PTPN20B	.	LOC643650
chr10	49814694	49815254	561	49815111	30.63	27.9638	11.9936	22.8947	FTE1_peak_614	chr10_49814694_49815254	ARHGAP22;FAM21B	.	.
chr10	50760302	50760617	316	50760441	16.25	10.2513	5.75142	6.36151	FTE1_peak_615	chr10_50760302_50760617	FAM21B	ERCC6;PGBD3	.
chr10	52085274	52085409	136	52085363	16.25	10.2513	5.75142	6.36151	FTE1_peak_616	chr10_52085274_52085409	SGMS1	.	.
chr10	52153646	52153803	158	52153707	14.38	6.17368	3.84469	2.81294	FTE1_peak_617	chr10_52153646_52153803	SGMS1	.	.
chr10	52760001	52760201	201	52760104	25.01	22.6539	10.4026	17.854	FTE1_peak_618	chr10_52760001_52760201	PRKG1	.	.
chr10	54078958	54079141	184	54079063	18.13	15.8213	8.54034	11.4425	FTE1_peak_619	chr10_54078958_54079141	.	DKK1;LOC100506939;PRKG1	.
chr10	54203172	54203313	142	54203282	15.63	12.332	7.42394	8.24545	FTE1_peak_620	chr10_54203172_54203313	.	.	.
chr10	54278507	54278638	132	54278558	15.63	12.2799	7.39071	8.24545	FTE1_peak_621	chr10_54278507_54278638	.	.	.
chr10	54286323	54286447	125	54286359	10.63	6.47374	4.79496	3.09703	FTE1_peak_622	chr10_54286323_54286447	.	.	.
chr10	54301093	54301260	168	54301178	18.75	15.8213	8.81944	11.4425	FTE1_peak_623	chr10_54301093_54301260	.	.	.
chr10	59463642	59463796	155	59463762	10.63	7.06535	5.19114	3.5552	FTE1_peak_624	chr10_59463642_59463796	.	.	.
chr10	59917235	59917414	180	59917320	16.25	10.2513	5.75142	6.36151	FTE1_peak_625	chr10_59917235_59917414	.	.	.
chr10	60195057	60195409	353	60195209	13.13	7.53305	4.70948	3.98652	FTE1_peak_626	chr10_60195057_60195409	.	.	.
chr10	60198229	60198394	166	60198297	19.38	12.7157	6.52163	8.61617	FTE1_peak_627	chr10_60198229_60198394	.	.	.
chr10	60235515	60235723	209	60235678	10.63	7.06535	5.19114	3.5552	FTE1_peak_628	chr10_60235515_60235723	.	.	.
chr10	60400977	60401360	384	60401118	22.51	20.7799	10.494	16.0826	FTE1_peak_629	chr10_60400977_60401360	BICC1	.	.
chr10	60401616	60401744	129	60401708	12.5	9.07861	6.02844	5.34078	FTE1_peak_630	chr10_60401616_60401744	BICC1	.	.
chr10	60616463	60616590	128	60616531	15	12.332	7.14484	8.24545	FTE1_peak_631	chr10_60616463_60616590	.	BICC1	.
chr10	62042705	62042867	163	62042758	21.88	19.5105	10.2149	14.8878	FTE1_peak_632	chr10_62042705_62042867	ANK3	.	.
chr10	62144585	62144837	253	62144694	20.63	18.2604	9.65674	13.7189	FTE1_peak_633	chr10_62144585_62144837	ANK3	.	.
chr10	62174621	62174815	195	62174719	21.88	19.5105	10.2149	14.8878	FTE1_peak_634	chr10_62174621_62174815	ANK3	.	.
chr10	62186249	62186385	137	62186293	15	12.332	7.14484	8.24545	FTE1_peak_635	chr10_62186249_62186385	ANK3	.	.
chr10	62226703	62226830	128	62226733	15.63	12.332	7.42394	8.24545	FTE1_peak_636	chr10_62226703_62226830	ANK3	.	.
chr10	62674525	62674845	321	62674729	15.63	12.332	7.42394	8.24545	FTE1_peak_637	chr10_62674525_62674845	RHOBTB1	.	.
chr10	63388064	63388207	144	63388119	21.88	15.2574	7.62691	10.9537	FTE1_peak_638	chr10_63388064_63388207	.	.	.
chr10	63388678	63388865	188	63388736	21.88	12.9176	6.31193	8.80891	FTE1_peak_639	chr10_63388678_63388865	.	.	.
chr10	63393494	63393787	294	63393581	20.01	8.71601	4.20105	5.02614	FTE1_peak_640	chr10_63393494_63393787	.	.	C10orf107
chr10	63592703	63592980	278	63592815	16.88	13.4709	7.98214	9.27938	FTE1_peak_641	chr10_63592703_63592980	.	.	.
chr10	63597017	63597207	191	63597103	20.01	18.2604	9.37764	13.7189	FTE1_peak_642	chr10_63597017_63597207	.	.	.
chr10	63810801	63811127	327	63810964	17.5	11.2084	6.1682	7.25339	FTE1_peak_643	chr10_63810801_63811127	ARID5B	.	.
chr10	63853716	63853945	230	63853829	19.38	16.1145	8.53616	11.7271	FTE1_peak_644	chr10_63853716_63853945	ARID5B	.	.
chr10	64083660	64083833	174	64083738	20.63	18.2604	9.65674	13.7189	FTE1_peak_645	chr10_64083660_64083833	.	.	.
chr10	64344108	64344342	235	64344209	18.13	15.8213	8.54034	11.4425	FTE1_peak_646	chr10_64344108_64344342	ZNF365	.	.
chr10	64646127	64646289	163	64646194	17.5	14.6345	8.26124	10.362	FTE1_peak_647	chr10_64646127_64646289	.	.	.
chr10	64996263	64996387	125	64996342	13.75	9.76491	6.34564	5.97889	FTE1_peak_648	chr10_64996263_64996387	JMJD1C	.	.
chr10	65135701	65135832	132	65135768	20.63	14.2141	7.21014	9.98737	FTE1_peak_649	chr10_65135701_65135832	JMJD1C	MIR1296	.
chr10	65136746	65136936	191	65136840	20.63	14.2141	7.21014	9.98737	FTE1_peak_650	chr10_65136746_65136936	JMJD1C	MIR1296	.
chr10	69853740	69853898	159	69853791	13.75	7.53305	4.91787	3.98652	FTE1_peak_651	chr10_69853740_69853898	.	HERC4	MYPN
chr10	69865704	69866341	638	69866240	14.38	8.41215	5.12626	4.73758	FTE1_peak_652	chr10_69865704_69866341	MYPN	.	.
chr10	69866488	69866624	137	69866573	16.88	10.2513	5.95981	6.36151	FTE1_peak_653	chr10_69866488_69866624	MYPN	.	.
chr10	69895829	69896182	354	69896018	15.63	12.332	7.42394	8.24545	FTE1_peak_654	chr10_69895829_69896182	MYPN	.	.
chr10	69913581	69913727	147	69913633	16.25	12.9516	7.3815	8.84166	FTE1_peak_655	chr10_69913581_69913727	MYPN	.	.
chr10	70821138	70821419	282	70821315	30.01	28.3603	11.9837	23.2809	FTE1_peak_656	chr10_70821138_70821419	.	.	SRGN
chr10	70848691	70848885	195	70848812	11.88	6.86932	4.95312	3.46253	FTE1_peak_657	chr10_70848691_70848885	SRGN	.	.
chr10	70920709	70920857	149	70920762	14.38	8.41215	5.12626	4.73758	FTE1_peak_658	chr10_70920709_70920857	VPS26A	.	SUPV3L1
chr10	71142753	71142886	134	71142780	15	10.1452	5.81961	6.27309	FTE1_peak_659	chr10_71142753_71142886	HK1	.	TACR2
chr10	71463570	71463934	365	71463639	21.26	19.5105	9.93584	14.8878	FTE1_peak_660	chr10_71463570_71463934	.	.	.
chr10	71598786	71598996	211	71598866	16.25	13.4709	7.70304	9.27938	FTE1_peak_661	chr10_71598786_71598996	COL13A1	.	.
chr10	71599417	71599615	199	71599520	11.88	7.96984	5.69199	4.39729	FTE1_peak_662	chr10_71599417_71599615	COL13A1	.	.
chr10	71951907	71952111	205	71951943	18.75	12.1886	6.58497	8.17106	FTE1_peak_663	chr10_71951907_71952111	.	SAR1A	PPA1
chr10	73857647	73857813	167	73857731	19.38	16.1879	8.58109	11.7979	FTE1_peak_664	chr10_73857647_73857813	ASCC1	SPOCK2	.
chr10	74036064	74037028	965	74036274	45.01	27.3139	7.52749	22.2803	FTE1_peak_665	chr10_74036064_74037028	.	DDIT4	.
chr10	74123740	74123879	140	74123835	14.38	9.61323	5.85858	5.8322	FTE1_peak_666	chr10_74123740_74123879	.	DNAJB12	MICU1
chr10	74523901	74524321	421	74524100	50.01	61.9554	22.7744	55.7742	FTE1_peak_667	chr10_74523901_74524321	MCU	.	.
chr10	75815791	75816011	221	75815905	11.88	5.86499	4.29271	2.57335	FTE1_peak_668	chr10_75815791_75816011	VCL	.	.
chr10	76053828	76053985	158	76053902	12.5	8.59549	5.71567	4.91286	FTE1_peak_669	chr10_76053828_76053985	ADK	.	.
chr10	76684121	76684273	153	76684168	16.25	13.4709	7.70304	9.27938	FTE1_peak_670	chr10_76684121_76684273	KAT6B	.	.
chr10	77307175	77307491	317	77307376	33.13	35.8175	15.2387	30.4096	FTE1_peak_671	chr10_77307175_77307491	.	.	.
chr10	77879391	77879597	207	77879503	22.51	18.9859	9.40236	14.4154	FTE1_peak_672	chr10_77879391_77879597	C10orf11	.	.
chr10	78069634	78069763	130	78069688	13.75	5.46828	3.6884	2.2132	FTE1_peak_673	chr10_78069634_78069763	C10orf11	.	.
chr10	78142045	78142618	574	78142404	24.38	20.2889	9.48837	15.6357	FTE1_peak_674	chr10_78142045_78142618	C10orf11	.	.
chr10	78318874	78319159	286	78319065	31.26	32.9534	14.4014	27.6446	FTE1_peak_675	chr10_78318874_78319159	.	C10orf11	.
chr10	78336175	78336321	147	78336258	14.38	11.2192	6.86574	7.25339	FTE1_peak_676	chr10_78336175_78336321	.	C10orf11	.
chr10	78343434	78343878	445	78343776	19.38	17.0303	9.09854	12.5833	FTE1_peak_677	chr10_78343434_78343878	.	C10orf11	.
chr10	79176197	79176469	273	79176376	19.38	13.1909	6.79336	9.0676	FTE1_peak_678	chr10_79176197_79176469	KCNMA1	.	.
chr10	79266249	79266521	273	79266459	19.38	7.99138	4.07602	4.40147	FTE1_peak_679	chr10_79266249_79266521	KCNMA1	.	.
chr10	79284257	79284494	238	79284375	22.51	16.3197	7.8353	11.9212	FTE1_peak_680	chr10_79284257_79284494	KCNMA1	.	.
chr10	79497456	79497635	180	79497573	20.01	18.2604	9.37764	13.7189	FTE1_peak_681	chr10_79497456_79497635	.	.	.
chr10	79704356	79704506	151	79704463	15	10.1008	5.79328	6.26448	FTE1_peak_682	chr10_79704356_79704506	.	DLG5;LOC100128292	.
chr10	80737788	80737957	170	80737893	21.26	9.46042	4.45112	5.68968	FTE1_peak_683	chr10_80737788_80737957	LOC283050	.	.
chr10	81914975	81915099	125	81915067	13.13	9.61033	5.98029	5.83082	FTE1_peak_684	chr10_81914975_81915099	ANXA11	PLAC9	.
chr10	84005727	84005881	155	84005774	21.26	19.5105	9.93584	14.8878	FTE1_peak_685	chr10_84005727_84005881	NRG3	.	.
chr10	84026372	84026575	204	84026492	13.75	10.1341	6.58664	6.26448	FTE1_peak_686	chr10_84026372_84026575	NRG3	.	.
chr10	84048307	84048507	201	84048465	10	7.06535	4.91204	3.5552	FTE1_peak_687	chr10_84048307_84048507	NRG3	.	.
chr10	86029576	86029827	252	86029706	13.75	8.24447	5.36495	4.58242	FTE1_peak_688	chr10_86029576_86029827	.	LRIT1;RGR	LOC170425
chr10	88917663	88917787	125	88917718	15.63	12.332	7.42394	8.24545	FTE1_peak_689	chr10_88917663_88917787	FAM35A	.	.
chr10	89395558	89395707	150	89395603	11.25	8.05487	5.47024	4.40147	FTE1_peak_690	chr10_89395558_89395707	.	.	PAPSS2
chr10	89721124	89721290	167	89721277	10.63	7.06535	5.19114	3.5552	FTE1_peak_691	chr10_89721124_89721290	PTEN	.	.
chr10	90411065	90411217	153	90411141	12.5	9.07861	6.02844	5.34078	FTE1_peak_692	chr10_90411065_90411217	.	.	LIPF
chr10	91134051	91134175	125	91134081	12.5	9.07861	6.02844	5.34078	FTE1_peak_693	chr10_91134051_91134175	.	.	IFIT1;IFIT1B
chr10	91187459	91187672	214	91187508	15.63	12.332	7.42394	8.24545	FTE1_peak_694	chr10_91187459_91187672	.	IFIT1;IFIT5	SLC16A12
chr10	91241470	91241659	190	91241536	21.88	7.73977	3.81346	4.17739	FTE1_peak_695	chr10_91241470_91241659	SLC16A12	.	.
chr10	91275427	91275579	153	91275504	16.25	13.4709	7.70304	9.27938	FTE1_peak_696	chr10_91275427_91275579	SLC16A12	.	.
chr10	91313199	91313394	196	91313314	14.38	11.2192	6.86574	7.25339	FTE1_peak_697	chr10_91313199_91313394	.	SLC16A12	PANK1
chr10	92176915	92177067	153	92177011	16.25	12.7627	7.26495	8.65829	FTE1_peak_698	chr10_92176915_92177067	.	.	.
chr10	92362662	92362908	247	92362748	16.88	13.4709	7.98214	9.27938	FTE1_peak_699	chr10_92362662_92362908	.	.	.
chr10	92670912	92671143	232	92671064	24.38	22.3067	10.6869	17.5182	FTE1_peak_700	chr10_92670912_92671143	.	RPP30	ANKRD1
chr10	92671256	92672049	794	92671589	32.51	34.379	14.9596	29.0275	FTE1_peak_701	chr10_92671256_92672049	ANKRD1	RPP30	.
chr10	92672161	92672585	425	92672229	15.63	12.332	7.42394	8.24545	FTE1_peak_702	chr10_92672161_92672585	ANKRD1	RPP30	.
chr10	92672686	92673588	903	92672782	21.26	19.5105	9.93584	14.8878	FTE1_peak_703	chr10_92672686_92673588	ANKRD1	RPP30	.
chr10	92673732	92674325	594	92674211	16.25	13.4709	7.70304	9.27938	FTE1_peak_704	chr10_92673732_92674325	ANKRD1	RPP30	.
chr10	92674578	92674721	144	92674620	13.75	10.1341	6.58664	6.26448	FTE1_peak_705	chr10_92674578_92674721	ANKRD1	RPP30	.
chr10	92674823	92675278	456	92674906	19.38	17.0303	9.09854	12.5833	FTE1_peak_706	chr10_92674823_92675278	ANKRD1	RPP30	.
chr10	92675944	92676073	130	92676007	15.63	10.1452	6.04695	6.27309	FTE1_peak_707	chr10_92675944_92676073	ANKRD1	RPP30	.
chr10	92676199	92676910	712	92676811	25.63	19.6141	8.87724	14.9783	FTE1_peak_708	chr10_92676199_92676910	ANKRD1	RPP30	.
chr10	92677026	92677273	248	92677080	14.38	11.1706	6.83501	7.24323	FTE1_peak_709	chr10_92677026_92677273	ANKRD1	RPP30	.
chr10	92677504	92677647	144	92677605	15.63	12.332	7.42394	8.24545	FTE1_peak_710	chr10_92677504_92677647	ANKRD1	RPP30	.
chr10	92677757	92678169	413	92677786	15	9.31879	5.33465	5.55219	FTE1_peak_711	chr10_92677757_92678169	ANKRD1	RPP30	.
chr10	92678890	92679111	222	92679036	16.25	13.4709	7.70304	9.27938	FTE1_peak_712	chr10_92678890_92679111	ANKRD1	RPP30	.
chr10	92679259	92679779	521	92679363	15.63	12.332	7.42394	8.24545	FTE1_peak_713	chr10_92679259_92679779	ANKRD1	RPP30	.
chr10	92680412	92681306	895	92681092	31.26	26.6287	10.7527	21.6138	FTE1_peak_714	chr10_92680412_92681306	ANKRD1	RPP30	.
chr10	92690382	92690586	205	92690410	13.13	10.0335	6.24462	6.23896	FTE1_peak_715	chr10_92690382_92690586	.	ANKRD1;RPP30	.
chr10	92690692	92691434	743	92691074	40.01	45.909	18.1262	40.2184	FTE1_peak_716	chr10_92690692_92691434	.	ANKRD1;RPP30	.
chr10	92728932	92729103	172	92728999	12.5	6.6833	4.50109	3.28667	FTE1_peak_717	chr10_92728932_92729103	.	.	.
chr10	93376849	93376981	133	93376892	16.88	13.4709	7.98214	9.27938	FTE1_peak_718	chr10_93376849_93376981	.	LOC100188947	PPP1R3C
chr10	93402617	93402741	125	93402659	15.63	10.8565	6.48941	6.94782	FTE1_peak_719	chr10_93402617_93402741	.	PPP1R3C	.
chr10	93412231	93412516	286	93412336	20.63	18.2604	9.65674	13.7189	FTE1_peak_720	chr10_93412231_93412516	.	PPP1R3C	.
chr10	93861568	93861700	133	93861664	21.26	15.2574	7.41853	10.9537	FTE1_peak_721	chr10_93861568_93861700	CPEB3	.	.
chr10	94732042	94732166	125	94732080	14.38	6.17368	3.84469	2.81294	FTE1_peak_722	chr10_94732042_94732166	EXOC6	.	.
chr10	95152103	95152306	204	95152245	11.88	8.05487	5.74934	4.40147	FTE1_peak_723	chr10_95152103_95152306	MYOF	.	.
chr10	95218600	95218736	137	95218679	18.75	9.86835	5.26798	6.07919	FTE1_peak_724	chr10_95218600_95218736	MYOF	.	.
chr10	95230926	95231158	233	95231024	23.76	11.0053	4.95125	7.08926	FTE1_peak_725	chr10_95230926_95231158	MYOF	.	CEP55
chr10	95953257	95953465	209	95953356	14.38	10.6003	6.47527	6.70108	FTE1_peak_726	chr10_95953257_95953465	PLCE1	.	.
chr10	96046789	96047030	242	96046927	21.26	19.5105	9.93584	14.8878	FTE1_peak_727	chr10_96046789_96047030	LOC100128054;PLCE1	.	.
chr10	96047149	96047357	209	96047307	15.63	12.332	7.42394	8.24545	FTE1_peak_728	chr10_96047149_96047357	PLCE1	LOC100128054	.
chr10	96980970	96981324	355	96981079	16.25	12.5794	7.15203	8.48747	FTE1_peak_729	chr10_96980970_96981324	C10orf129	.	PDLIM1
chr10	96989468	96989692	225	96989598	19.38	15.4837	8.15203	11.1694	FTE1_peak_730	chr10_96989468_96989692	.	C10orf129	PDLIM1
chr10	97020430	97020560	131	97020483	14.38	10.6547	6.50953	6.75174	FTE1_peak_731	chr10_97020430_97020560	PDLIM1	.	.
chr10	97068604	97068764	161	97068683	21.26	19.5105	9.93584	14.8878	FTE1_peak_732	chr10_97068604_97068764	.	PDLIM1	SORBS1
chr10	98784419	98784593	175	98784499	13.13	7.53305	4.70948	3.98652	FTE1_peak_733	chr10_98784419_98784593	SLIT1	.	.
chr10	99408774	99408980	207	99408868	12.5	6.6833	4.50109	3.28667	FTE1_peak_734	chr10_99408774_99408980	PI4K2A	MORN4	AVPI1
chr10	99599967	99600104	138	99600017	20.63	14.2141	7.21014	9.98737	FTE1_peak_735	chr10_99599967_99600104	.	.	CRTAC1;GOLGA7B
chr10	100082948	100083224	277	100083028	23.13	21.9875	10.7249	17.2461	FTE1_peak_736	chr10_100082948_100083224	.	.	.
chr10	100109296	100109586	291	100109570	10.63	5.92509	4.42963	2.62852	FTE1_peak_737	chr10_100109296_100109586	.	.	.
chr10	101155501	101155710	210	101155689	12.5	6.6833	4.50109	3.28667	FTE1_peak_738	chr10_101155501_101155710	.	CNNM1	GOT1
chr10	102133763	102134002	240	102133792	14.38	7.16019	4.39394	3.64748	FTE1_peak_739	chr10_102133763_102134002	LINC00263	SCD	.
chr10	104060325	104060456	132	104060398	16.25	13.0807	7.4613	8.96776	FTE1_peak_740	chr10_104060325_104060456	GBF1	.	.
chr10	104512392	104512581	190	104512461	15	11.9055	6.88341	7.91193	FTE1_peak_741	chr10_104512392_104512581	C10orf26	SFXN2	.
chr10	104990992	104991273	282	104991166	21.26	16.9505	8.39833	12.5317	FTE1_peak_742	chr10_104990992_104991273	.	.	LOC729020
chr10	105869742	105870026	285	105869963	11.88	8.05487	5.74934	4.40147	FTE1_peak_743	chr10_105869742_105870026	.	COL17A1	SFR1;WDR96
chr10	106059897	106060028	132	106059953	15.63	10.6093	6.3349	6.70697	FTE1_peak_744	chr10_106059897_106060028	.	GSTO2	ITPRIP
chr10	106069854	106069994	141	106069957	20.63	8.71601	4.32608	5.02614	FTE1_peak_745	chr10_106069854_106069994	.	GSTO2	ITPRIP
chr10	110965822	110965978	157	110965921	19.38	17.0303	9.09854	12.5833	FTE1_peak_746	chr10_110965822_110965978	.	.	.
chr10	112159179	112159342	164	112159258	21.26	15.2574	7.41853	10.9537	FTE1_peak_747	chr10_112159179_112159342	.	.	.
chr10	112174539	112174732	194	112174644	19.38	14.6572	7.65449	10.3844	FTE1_peak_748	chr10_112174539_112174732	.	.	.
chr10	112672259	112672456	198	112672440	13.13	5.46828	3.53211	2.2132	FTE1_peak_749	chr10_112672259_112672456	BBIP1	MIR4680;PDCD4	RPL13AP6;SHOC2
chr10	112794487	112794674	188	112794575	12.5	9.07861	6.02844	5.34078	FTE1_peak_750	chr10_112794487_112794674	.	SHOC2	.
chr10	112794820	112794999	180	112794912	13.75	10.1341	6.58664	6.26448	FTE1_peak_751	chr10_112794820_112794999	.	SHOC2	.
chr10	113987508	113987683	176	113987573	16.25	13.4709	7.70304	9.27938	FTE1_peak_752	chr10_113987508_113987683	.	.	.
chr10	113988969	113989161	193	113989063	14.38	11.2192	6.86574	7.25339	FTE1_peak_753	chr10_113988969_113989161	.	.	.
chr10	114031887	114032013	127	114031932	14.38	8.41215	5.12626	4.73758	FTE1_peak_754	chr10_114031887_114032013	.	.	TECTB
chr10	114523772	114524260	489	114524076	13.75	10.1341	6.58664	6.26448	FTE1_peak_755	chr10_114523772_114524260	VTI1A	.	.
chr10	114812271	114812395	125	114812317	10.63	7.06535	5.19114	3.5552	FTE1_peak_756	chr10_114812271_114812395	TCF7L2	.	.
chr10	114891481	114891738	258	114891596	21.88	11.7967	5.72019	7.8066	FTE1_peak_757	chr10_114891481_114891738	TCF7L2	.	.
chr10	115086025	115086288	264	115086130	21.26	9.46042	4.45112	5.68968	FTE1_peak_758	chr10_115086025_115086288	.	.	.
chr10	115654897	115655086	190	115655040	20.01	10.9285	5.25131	7.01523	FTE1_peak_759	chr10_115654897_115655086	NHLRC2	.	.
chr10	116031619	116031784	166	116031699	15.63	12.1525	7.3095	8.1508	FTE1_peak_760	chr10_116031619_116031784	VWA2	.	AFAP1L2
chr10	116408203	116408390	188	116408313	16.88	13.4709	7.98214	9.27938	FTE1_peak_761	chr10_116408203_116408390	ABLIM1	.	.
chr10	116585557	116585786	230	116585729	15.63	6.9063	4.15728	3.49389	FTE1_peak_762	chr10_116585557_116585786	FAM160B1	.	.
chr10	116616456	116616670	215	116616498	17.5	14.5754	8.22426	10.3316	FTE1_peak_763	chr10_116616456_116616670	FAM160B1	.	.
chr10	116629465	116629619	155	116629501	11.88	8.05487	5.74934	4.40147	FTE1_peak_764	chr10_116629465_116629619	FAM160B1	.	.
chr10	116685624	116685899	276	116685782	21.26	19.5105	9.93584	14.8878	FTE1_peak_765	chr10_116685624_116685899	.	FAM160B1	TRUB1
chr10	117696867	117697113	247	117696907	11.25	8.05487	5.47024	4.40147	FTE1_peak_766	chr10_117696867_117697113	ATRNL1	.	.
chr10	117705364	117705493	130	117705426	12.5	9.07861	6.02844	5.34078	FTE1_peak_767	chr10_117705364_117705493	ATRNL1	.	.
chr10	117705699	117705840	142	117705763	15.63	9.31879	5.54303	5.55219	FTE1_peak_768	chr10_117705699_117705840	ATRNL1	.	.
chr10	117706696	117706941	246	117706860	25.01	24.6954	11.6104	19.7748	FTE1_peak_769	chr10_117706696_117706941	ATRNL1	.	.
chr10	120873412	120873607	196	120873515	15	9.16749	5.24719	5.42505	FTE1_peak_770	chr10_120873412_120873607	FAM45A	.	SFXN4
chr10	120932083	120932368	286	120932329	15.63	9.31879	5.54303	5.55219	FTE1_peak_771	chr10_120932083_120932368	PRDX3	SFXN4	.
chr10	121013570	121013754	185	121013666	18.13	13.748	7.28753	9.54549	FTE1_peak_772	chr10_121013570_121013754	GRK5	.	.
chr10	121441707	121441869	163	121441775	23.76	17.4005	8.25208	12.9311	FTE1_peak_773	chr10_121441707_121441869	.	BAG3	.
chr10	121562935	121563081	147	121562978	13.75	7.53305	4.91787	3.98652	FTE1_peak_774	chr10_121562935_121563081	INPP5F	.	MCMBP
chr10	121608984	121609136	153	121609080	17.5	14.4308	8.13389	10.1931	FTE1_peak_775	chr10_121608984_121609136	MCMBP	INPP5F	.
chr10	122175594	122175776	183	122175675	20.01	18.2604	9.37764	13.7189	FTE1_peak_776	chr10_122175594_122175776	.	.	.
chr10	124060691	124060883	193	124060812	13.75	10.1341	6.58664	6.26448	FTE1_peak_777	chr10_124060691_124060883	BTBD16	.	.
chr10	124228515	124229012	498	124228645	30.01	16.9306	6.20158	12.5124	FTE1_peak_778	chr10_124228515_124229012	HTRA1	ARMS2	.
chr10	124611971	124612095	125	124612010	15	10.1452	5.81961	6.27309	FTE1_peak_779	chr10_124611971_124612095	FAM24B;FAM24B-CUZD1	CUZD1	LOC399815
chr10	125568456	125568678	223	125568558	17.5	12.1499	6.72894	8.1493	FTE1_peak_780	chr10_125568456_125568678	CPXM2	.	.
chr10	126595186	126595513	328	126595287	20.01	18.0205	9.23308	13.5345	FTE1_peak_781	chr10_126595186_126595513	.	.	.
chr10	126633649	126633852	204	126633656	10.63	7.06535	5.19114	3.5552	FTE1_peak_782	chr10_126633649_126633852	ZRANB1	.	.
chr10	126952281	126952405	125	126952353	14.38	9.18101	5.59228	5.43703	FTE1_peak_783	chr10_126952281_126952405	.	.	.
chr10	127936140	127936344	205	127936236	14.38	9.98653	6.0906	6.19372	FTE1_peak_784	chr10_127936140_127936344	ADAM12	.	.
chr10	127941535	127942008	474	127941895	18.13	13.748	7.28753	9.54549	FTE1_peak_785	chr10_127941535_127942008	ADAM12	.	.
chr10	128086695	128086872	178	128086770	21.26	19.5105	9.93584	14.8878	FTE1_peak_786	chr10_128086695_128086872	.	ADAM12	C10orf90
chr10	128148740	128148884	145	128148851	12.5	9.03697	6.00146	5.33408	FTE1_peak_787	chr10_128148740_128148884	C10orf90	.	.
chr10	128947090	128947289	200	128947166	11.88	8.05487	5.74934	4.40147	FTE1_peak_788	chr10_128947090_128947289	DOCK1;FAM196A	.	.
chr11	2098582	2099004	423	2098675	17.5	13.9478	7.83263	9.7387	FTE1_peak_789	chr11_2098582_2099004	.	.	.
chr11	3926707	3926933	227	3926791	20.01	16.6313	8.4021	12.2207	FTE1_peak_790	chr11_3926707_3926933	STIM1	.	.
chr11	5301893	5302088	196	5301903	10.63	7.06535	5.19114	3.5552	FTE1_peak_791	chr11_5301893_5302088	.	HBE1;HBG2	OR51B4
chr11	5385501	5385788	288	5385680	28.76	28.7582	13.285	23.6384	FTE1_peak_792	chr11_5385501_5385788	OR51B5	OR51B6	OR51M1
chr11	5388957	5389187	231	5389126	13.13	10.1341	6.30754	6.26448	FTE1_peak_793	chr11_5388957_5389187	OR51B5	OR51B6	OR51M1
chr11	6453186	6453310	125	6453270	16.25	13.4709	7.70304	9.27938	FTE1_peak_794	chr11_6453186_6453310	HPX	APBB1	TRIM3
chr11	7594527	7594683	157	7594601	11.25	8.05487	5.47024	4.40147	FTE1_peak_795	chr11_7594527_7594683	PPFIBP2	.	.
chr11	7998914	7999074	161	7998976	22.51	15.2469	7.23259	10.9537	FTE1_peak_796	chr11_7998914_7999074	.	NLRP10	EIF3F
chr11	7999203	7999418	216	7999341	19.38	13.1909	6.79336	9.0676	FTE1_peak_797	chr11_7999203_7999418	.	NLRP10	EIF3F
chr11	8047536	8047676	141	8047622	16.88	10.2513	5.95981	6.36151	FTE1_peak_798	chr11_8047536_8047676	.	EIF3F	TUB
chr11	8709454	8709699	246	8709494	11.88	6.12215	4.45995	2.7663	FTE1_peak_799	chr11_8709454_8709699	RPL27A	SNORA3;SNORA45;TRIM66	ST5
chr11	8740864	8741161	298	8741059	26.26	23.818	10.8485	18.9606	FTE1_peak_800	chr11_8740864_8741161	ST5	RPL27A	.
chr11	8790441	8790565	125	8790508	13.75	8.64478	5.62042	4.95754	FTE1_peak_801	chr11_8790441_8790565	ST5	.	.
chr11	8939122	8939265	144	8939206	15	11.33	6.53222	7.36055	FTE1_peak_802	chr11_8939122_8939265	AKIP1	ST5	ASCL3;C11orf16;TMEM9B
chr11	9241272	9241431	160	9241382	18.13	9.25272	4.78244	5.50444	FTE1_peak_803	chr11_9241272_9241431	DENND5A	.	.
chr11	9781251	9781532	282	9781365	25.01	15.5365	6.54253	11.221	FTE1_peak_804	chr11_9781251_9781532	LOC283104	LOC440028;SWAP70	SBF2
chr11	9927087	9927274	188	9927165	14.38	11.2192	6.86574	7.25339	FTE1_peak_805	chr11_9927087_9927274	SBF2	.	.
chr11	9927592	9928335	744	9927721	39.39	44.7009	18.0297	39.038	FTE1_peak_806	chr11_9927592_9928335	SBF2	.	.
chr11	9964957	9965114	158	9965071	16.25	11.6314	6.57305	7.65296	FTE1_peak_807	chr11_9964957_9965114	SBF2	.	.
chr11	9965376	9965529	154	9965452	21.26	18.1797	9.13049	13.6907	FTE1_peak_808	chr11_9965376_9965529	SBF2	.	.
chr11	10139365	10139495	131	10139389	14.38	11.1706	6.83501	7.24323	FTE1_peak_809	chr11_10139365_10139495	SBF2	.	.
chr11	10139714	10139934	221	10139890	15.63	12.332	7.42394	8.24545	FTE1_peak_810	chr11_10139714_10139934	SBF2	.	.
chr11	10350520	10350644	125	10350590	13.13	10.1341	6.30754	6.26448	FTE1_peak_811	chr11_10350520_10350644	.	ADM	.
chr11	10373399	10373627	229	10373516	12.5	9.07861	6.02844	5.34078	FTE1_peak_812	chr11_10373399_10373627	.	.	.
chr11	10376852	10377078	227	10376973	12.5	9.07861	6.02844	5.34078	FTE1_peak_813	chr11_10376852_10377078	.	.	.
chr11	10681259	10681568	310	10681486	23.13	17.4005	8.04369	12.9311	FTE1_peak_814	chr11_10681259_10681568	MRVI1	.	.
chr11	11770311	11770490	180	11770390	25.01	19.6141	8.66885	14.9783	FTE1_peak_815	chr11_11770311_11770490	.	.	.
chr11	12087797	12088140	344	12087955	41.26	39.3523	14.0869	33.8439	FTE1_peak_816	chr11_12087797_12088140	.	.	.
chr11	12108185	12108390	206	12108307	16.25	13.4153	7.66856	9.27938	FTE1_peak_817	chr11_12108185_12108390	.	.	MICAL2
chr11	12109351	12109540	190	12109391	17.5	6.60524	3.70092	3.22475	FTE1_peak_818	chr11_12109351_12109540	.	.	MICAL2
chr11	12144828	12144952	125	12144888	13.75	10.1341	6.58664	6.26448	FTE1_peak_819	chr11_12144828_12144952	MICAL2	.	.
chr11	12148116	12148434	319	12148284	15.63	9.31879	5.54303	5.55219	FTE1_peak_820	chr11_12148116_12148434	MICAL2	.	.
chr11	12188674	12188879	206	12188759	16.25	10.2513	5.75142	6.36151	FTE1_peak_821	chr11_12188674_12188879	MICAL2	.	.
chr11	12204310	12205072	763	12204957	24.38	23.373	11.3313	18.5309	FTE1_peak_822	chr11_12204310_12205072	MICAL2	.	.
chr11	12222154	12222693	540	12222587	23.13	21.9875	10.7249	17.2461	FTE1_peak_823	chr11_12222154_12222693	MICAL2	.	.
chr11	12254487	12254672	186	12254494	14.38	6.17368	3.84469	2.81294	FTE1_peak_824	chr11_12254487_12254672	MICAL2	.	.
chr11	12651254	12651396	143	12651308	13.13	10.1341	6.30754	6.26448	FTE1_peak_825	chr11_12651254_12651396	.	.	.
chr11	12791618	12791799	182	12791736	32.51	15.9754	5.58476	11.5908	FTE1_peak_826	chr11_12791618_12791799	TEAD1	.	.
chr11	12922150	12922305	156	12922218	15.63	12.332	7.42394	8.24545	FTE1_peak_827	chr11_12922150_12922305	TEAD1	.	.
chr11	13140222	13140504	283	13140411	15.63	9.31879	5.54303	5.55219	FTE1_peak_828	chr11_13140222_13140504	.	.	.
chr11	13161918	13162180	263	13162108	11.88	8.05487	5.74934	4.40147	FTE1_peak_829	chr11_13161918_13162180	.	.	.
chr11	13229708	13229917	210	13229811	12.5	6.6833	4.50109	3.28667	FTE1_peak_830	chr11_13229708_13229917	.	.	.
chr11	15687023	15687207	185	15687114	20.01	18.2604	9.37764	13.7189	FTE1_peak_831	chr11_15687023_15687207	.	.	.
chr11	17192994	17193192	199	17193098	28.76	21.6766	9.15617	16.9508	FTE1_peak_832	chr11_17192994_17193192	.	PIK3C2A	.
chr11	17402796	17402991	196	17402892	17.5	11.2084	6.1682	7.25339	FTE1_peak_833	chr11_17402796_17402991	.	B7H6	ABCC8;KCNJ11
chr11	18334611	18334847	237	18334731	28.76	27.6224	12.5958	22.5652	FTE1_peak_834	chr11_18334611_18334847	HPS5	.	GTF2H1
chr11	18430141	18430901	761	18430607	16.88	10.2513	5.95981	6.36151	FTE1_peak_835	chr11_18430141_18430901	.	LDHA	LDHC
chr11	19391803	19392258	456	19392184	15	12.332	7.14484	8.24545	FTE1_peak_836	chr11_19391803_19392258	NAV2	.	.
chr11	19441089	19441226	138	19441149	12.5	9.07861	6.02844	5.34078	FTE1_peak_837	chr11_19441089_19441226	NAV2	.	.
chr11	19617437	19617656	220	19617553	23.13	14.3927	6.43495	10.1559	FTE1_peak_838	chr11_19617437_19617656	NAV2	MIR4486	.
chr11	19701808	19701933	126	19701846	18.13	15.0237	8.05464	10.7383	FTE1_peak_839	chr11_19701808_19701933	NAV2	.	.
chr11	19940570	19940740	171	19940702	15	10.6093	6.09674	6.70697	FTE1_peak_840	chr11_19940570_19940740	NAV2	.	.
chr11	20057303	20057536	234	20057413	16.25	13.4709	7.70304	9.27938	FTE1_peak_841	chr11_20057303_20057536	NAV2	.	.
chr11	20132926	20133053	128	20133022	13.75	7.53305	4.91787	3.98652	FTE1_peak_842	chr11_20132926_20133053	NAV2	.	.
chr11	23919086	23919328	243	23919178	25.01	24.6954	11.6104	19.7748	FTE1_peak_843	chr11_23919086_23919328	.	.	.
chr11	26050193	26050393	201	26050288	16.25	10.2513	5.75142	6.36151	FTE1_peak_844	chr11_26050193_26050393	.	.	.
chr11	26209343	26209487	145	26209385	23.76	22.0676	11.0522	17.2871	FTE1_peak_845	chr11_26209343_26209487	.	.	.
chr11	26842458	26842630	173	26842530	15.63	12.332	7.42394	8.24545	FTE1_peak_846	chr11_26842458_26842630	.	.	.
chr11	26968980	26969322	343	26969086	18.13	15.8213	8.54034	11.4425	FTE1_peak_847	chr11_26968980_26969322	.	.	.
chr11	27303847	27304031	185	27303924	13.13	10.1341	6.30754	6.26448	FTE1_peak_848	chr11_27303847_27304031	.	.	.
chr11	27584877	27585002	126	27584933	16.25	10.2513	5.75142	6.36151	FTE1_peak_849	chr11_27584877_27585002	BDNF-AS1	.	.
chr11	27671950	27672074	125	27672050	10.63	7.06535	5.19114	3.5552	FTE1_peak_850	chr11_27671950_27672074	BDNF-AS1	.	BDNF
chr11	27948533	27948730	198	27948622	10.63	7.06535	5.19114	3.5552	FTE1_peak_851	chr11_27948533_27948730	.	.	.
chr11	27955831	27956093	263	27955942	26.26	25.9435	12.1142	20.982	FTE1_peak_852	chr11_27955831_27956093	.	.	.
chr11	27956392	27956604	213	27956540	10.63	7.06535	5.19114	3.5552	FTE1_peak_853	chr11_27956392_27956604	.	.	.
chr11	28016783	28016917	135	28016867	16.88	13.4709	7.98214	9.27938	FTE1_peak_854	chr11_28016783_28016917	.	.	KIF18A
chr11	28406047	28406249	203	28406154	15.63	10.3263	6.15893	6.43561	FTE1_peak_855	chr11_28406047_28406249	.	.	.
chr11	28779396	28779527	132	28779497	16.25	10.2513	5.75142	6.36151	FTE1_peak_856	chr11_28779396_28779527	.	.	.
chr11	28855274	28855514	241	28855430	15	12.332	7.14484	8.24545	FTE1_peak_857	chr11_28855274_28855514	.	.	.
chr11	28857482	28857638	157	28857536	16.25	10.2513	5.75142	6.36151	FTE1_peak_858	chr11_28857482_28857638	.	.	.
chr11	28857842	28858202	361	28857911	15.63	12.332	7.42394	8.24545	FTE1_peak_859	chr11_28857842_28858202	.	.	.
chr11	29141666	29141881	216	29141795	24.38	23.373	11.3313	18.5309	FTE1_peak_860	chr11_29141666_29141881	.	.	.
chr11	29193242	29193381	140	29193312	15.63	12.332	7.42394	8.24545	FTE1_peak_861	chr11_29193242_29193381	.	.	.
chr11	29195213	29195475	263	29195335	20.01	18.2604	9.37764	13.7189	FTE1_peak_862	chr11_29195213_29195475	.	.	.
chr11	29285906	29286036	131	29285952	16.25	13.4709	7.70304	9.27938	FTE1_peak_863	chr11_29285906_29286036	.	.	.
chr11	29303850	29303983	134	29303936	15	12.332	7.14484	8.24545	FTE1_peak_864	chr11_29303850_29303983	.	.	.
chr11	29339801	29339958	158	29339902	14.38	11.2192	6.86574	7.25339	FTE1_peak_865	chr11_29339801_29339958	.	.	.
chr11	32055679	32056103	425	32055795	18.75	15.0237	8.31786	10.7383	FTE1_peak_866	chr11_32055679_32056103	.	.	.
chr11	32602633	32602836	204	32602723	16.88	8.2627	4.79985	4.60056	FTE1_peak_867	chr11_32602633_32602836	.	.	CCDC73;EIF3M
chr11	33668377	33668545	169	33668481	19.38	16.1879	8.58109	11.7979	FTE1_peak_868	chr11_33668377_33668545	C11orf41	.	.
chr11	33712033	33712449	417	33712123	20.63	18.1908	9.61352	13.6971	FTE1_peak_869	chr11_33712033_33712449	.	C11orf41	C11orf91;CD59
chr11	33712594	33712751	158	33712673	18.13	13.748	7.28753	9.54549	FTE1_peak_870	chr11_33712594_33712751	.	C11orf41	C11orf91;CD59
chr11	33713839	33713996	158	33713883	15.63	12.332	7.42394	8.24545	FTE1_peak_871	chr11_33713839_33713996	.	C11orf41	C11orf91;CD59
chr11	33744805	33745157	353	33744913	29.38	30.1425	13.5641	24.9673	FTE1_peak_872	chr11_33744805_33745157	CD59	C11orf91	FBXO3
chr11	34364866	34364993	128	34364944	19.38	17.0303	9.09854	12.5833	FTE1_peak_873	chr11_34364866_34364993	ABTB2	.	.
chr11	34366667	34367040	374	34366766	29.38	30.1425	13.5641	24.9673	FTE1_peak_874	chr11_34366667_34367040	ABTB2	.	.
chr11	34621161	34621404	244	34621297	19.38	17.0303	9.09854	12.5833	FTE1_peak_875	chr11_34621161_34621404	.	.	EHF
chr11	34675680	34675937	258	34675746	13.13	10.1341	6.30754	6.26448	FTE1_peak_876	chr11_34675680_34675937	EHF	.	.
chr11	34676425	34676680	256	34676581	20.01	18.2604	9.37764	13.7189	FTE1_peak_877	chr11_34676425_34676680	EHF	.	.
chr11	34771867	34772129	263	34772044	31.26	31.5732	13.5824	26.3283	FTE1_peak_878	chr11_34771867_34772129	.	.	.
chr11	34998584	34998712	129	34998608	12.5	8.93519	5.93551	5.23866	FTE1_peak_879	chr11_34998584_34998712	PDHX	.	.
chr11	35057519	35057838	320	35057587	14.38	11.2192	6.86574	7.25339	FTE1_peak_880	chr11_35057519_35057838	.	.	.
chr11	35164274	35164404	131	35164354	16.25	9.7408	5.45589	5.95576	FTE1_peak_881	chr11_35164274_35164404	CD44	.	.
chr11	35166160	35166318	159	35166213	11.25	8.05487	5.47024	4.40147	FTE1_peak_882	chr11_35166160_35166318	CD44	.	.
chr11	35188225	35188442	218	35188338	20.01	18.2604	9.37764	13.7189	FTE1_peak_883	chr11_35188225_35188442	CD44	.	.
chr11	35236197	35236454	258	35236411	18.13	14.9541	8.01246	10.6727	FTE1_peak_884	chr11_35236197_35236454	CD44	.	.
chr11	35513087	35513300	214	35513196	26.88	20.7457	9.29402	16.0681	FTE1_peak_885	chr11_35513087_35513300	PAMR1	.	.
chr11	35533352	35533484	133	35533407	16.25	13.0158	7.42119	8.90469	FTE1_peak_886	chr11_35533352_35533484	PAMR1	.	.
chr11	35563707	35563910	204	35563809	18.75	15.8213	8.81944	11.4425	FTE1_peak_887	chr11_35563707_35563910	.	PAMR1	.
chr11	35601244	35601458	215	35601355	21.88	19.5105	10.2149	14.8878	FTE1_peak_888	chr11_35601244_35601458	.	.	.
chr11	36376348	36376484	137	36376418	15	6.9063	4.00098	3.49389	FTE1_peak_889	chr11_36376348_36376484	PRR5L	.	.
chr11	36491392	36491582	191	36491491	11.88	8.05487	5.74934	4.40147	FTE1_peak_890	chr11_36491392_36491582	.	PRR5L	TRAF6
chr11	44596231	44596501	271	44596401	13.13	9.41135	5.85635	5.64288	FTE1_peak_891	chr11_44596231_44596501	CD82	.	.
chr11	44863875	44864097	223	44863999	25.63	24.6954	11.8895	19.7748	FTE1_peak_892	chr11_44863875_44864097	TSPAN18	.	.
chr11	47945755	47945888	134	47945812	16.25	9.48359	5.30901	5.71155	FTE1_peak_893	chr11_47945755_47945888	.	.	.
chr11	47946032	47946167	136	47946115	17.5	12.0994	6.6985	8.10009	FTE1_peak_894	chr11_47946032_47946167	.	.	.
chr11	57202264	57202418	155	57202338	15	12.332	7.14484	8.24545	FTE1_peak_895	chr11_57202264_57202418	.	SLC43A3	RTN4RL2
chr11	57546143	57546276	134	57546178	15	12.332	7.14484	8.24545	FTE1_peak_896	chr11_57546143_57546276	CTNND1;TMX2-CTNND1	BTBD18	.
chr11	58086205	58086329	125	58086285	13.13	10.1341	6.30754	6.26448	FTE1_peak_897	chr11_58086205_58086329	.	.	.
chr11	58344982	58345195	214	58345122	16.88	9.70334	5.63132	5.9208	FTE1_peak_898	chr11_58344982_58345195	LPXN	.	ZFP91;ZFP91-CNTF
chr11	58687142	58687266	125	58687210	16.88	13.4709	7.98214	9.27938	FTE1_peak_899	chr11_58687142_58687266	.	.	GLYATL1;LOC283194
chr11	59333628	59333794	167	59333703	23.13	12.19	5.36246	8.17244	FTE1_peak_900	chr11_59333628_59333794	.	.	MIR3162;OSBP
chr11	59474376	59474660	285	59474468	21.88	15.2574	7.62691	10.9537	FTE1_peak_901	chr11_59474376_59474660	.	.	OR10V1
chr11	59476134	59476358	225	59476258	14.38	8.41215	5.12626	4.73758	FTE1_peak_902	chr11_59476134_59476358	.	.	OR10V1
chr11	60608392	60608520	129	60608461	18.13	11.827	6.17089	7.83605	FTE1_peak_903	chr11_60608392_60608520	.	.	CCDC86;PTGDR2;ZP1
chr11	61146264	61146424	161	61146333	28.13	17.4638	6.85468	12.9929	FTE1_peak_904	chr11_61146264_61146424	.	CYBASC3;TMEM138	CPSF7;TMEM216
chr11	61730763	61731008	246	61730797	14.38	7.21559	4.42555	3.6962	FTE1_peak_905	chr11_61730763_61731008	BEST1	.	FTH1
chr11	61731160	61731337	178	61731271	16.25	8.06492	4.52571	4.41132	FTE1_peak_906	chr11_61731160_61731337	BEST1	.	FTH1
chr11	61731604	61731834	231	61731654	16.88	7.66459	4.46986	4.10596	FTE1_peak_907	chr11_61731604_61731834	BEST1;FTH1	.	.
chr11	62608525	62609346	822	62609025	95.02	97.8606	20.7621	88.5053	FTE1_peak_908	chr11_62608525_62609346	.	STX5;WDR74	SLC3A2;SNHG1;SNORD22;SNORD25;SNORD26;SNORD27;SNORD28;SNORD29;SNORD30;SNORD31
chr11	62622780	62622926	147	62622830	16.25	9.44777	5.28866	5.67894	FTE1_peak_909	chr11_62622780_62622926	SNHG1;SNORD26	SNORD22;SNORD27;SNORD28;SNORD29;SNORD30;SNORD31;STX5;WDR74	SLC3A2;SNORD25
chr11	64102657	64102833	177	64102772	16.88	9.30675	5.39756	5.55219	FTE1_peak_910	chr11_64102657_64102833	.	ESRRA;PRDX5;TRMT112	CCDC88B;RPS6KA4
chr11	64153883	64154049	167	64153906	12.5	9.07861	6.02844	5.34078	FTE1_peak_911	chr11_64153883_64154049	.	CCDC88B;MIR1237;RPS6KA4	.
chr11	64918330	64918556	227	64918415	13.75	8.64478	5.62042	4.95754	FTE1_peak_912	chr11_64918330_64918556	.	FAU;MRPL49;SYVN1	SPDYC
chr11	65190201	65190645	445	65190289	43.76	18.8373	5.18974	14.2716	FTE1_peak_913	chr11_65190201_65190645	NEAT1	FRMD8	MIR612
chr11	65191365	65192328	964	65192218	25.01	16.5172	7.0288	12.1101	FTE1_peak_914	chr11_65191365_65192328	NEAT1	FRMD8	MIR612
chr11	65192598	65192918	321	65192849	22.51	13.6533	6.37448	9.45618	FTE1_peak_915	chr11_65192598_65192918	NEAT1	FRMD8	MIR612
chr11	65193034	65193298	265	65193134	17.5	9.1484	5.00124	5.40617	FTE1_peak_916	chr11_65193034_65193298	NEAT1	FRMD8	MIR612
chr11	65193566	65195379	1814	65194261	33.13	26.0626	9.78744	21.067	FTE1_peak_917	chr11_65193566_65195379	NEAT1	FRMD8	MIR612
chr11	65195499	65197004	1506	65196284	19.38	17.0303	9.09854	12.5833	FTE1_peak_918	chr11_65195499_65197004	.	FRMD8;NEAT1	MIR612
chr11	65197191	65197410	220	65197289	21.88	15.2574	7.62691	10.9537	FTE1_peak_919	chr11_65197191_65197410	.	FRMD8;NEAT1	MIR612
chr11	65197845	65197999	155	65197903	13.75	7.53305	4.91787	3.98652	FTE1_peak_920	chr11_65197845_65197999	.	FRMD8;NEAT1	MIR612
chr11	65198337	65198696	360	65198415	15.63	12.0898	7.26955	8.09065	FTE1_peak_921	chr11_65198337_65198696	.	FRMD8;NEAT1	MIR612
chr11	65202553	65203115	563	65202965	15.63	12.332	7.42394	8.24545	FTE1_peak_922	chr11_65202553_65203115	.	FRMD8;NEAT1	MIR612
chr11	65204293	65204453	161	65204335	11.88	7.96984	5.69199	4.39729	FTE1_peak_923	chr11_65204293_65204453	.	FRMD8;NEAT1	MIR612
chr11	65206687	65206931	245	65206731	15	9.31879	5.33465	5.55219	FTE1_peak_924	chr11_65206687_65206931	.	FRMD8;NEAT1	MIR612
chr11	65207066	65207226	161	65207185	16.25	10.2513	5.75142	6.36151	FTE1_peak_925	chr11_65207066_65207226	.	FRMD8;NEAT1	MIR612
chr11	65207855	65208002	148	65207951	16.25	11.2799	6.36102	7.31211	FTE1_peak_926	chr11_65207855_65208002	.	FRMD8;NEAT1	MIR612
chr11	65212378	65212515	138	65212488	17.5	9.50086	5.19427	5.72874	FTE1_peak_927	chr11_65212378_65212515	.	MIR612;NEAT1	.
chr11	65259141	65259527	387	65259340	20.01	12.9749	6.31737	8.86474	FTE1_peak_928	chr11_65259141_65259527	.	.	MALAT1
chr11	65266449	65268126	1678	65266838	45.64	40.3092	13.2303	34.7731	FTE1_peak_929	chr11_65266449_65268126	MALAT1	.	SCYL1
chr11	65268252	65275473	7222	65274922	46.26	38.2629	11.8155	32.7888	FTE1_peak_930	chr11_65268252_65275473	MALAT1	.	SCYL1
chr11	66211210	66211374	165	66211263	15	10.3725	5.95495	6.48102	FTE1_peak_931	chr11_66211210_66211374	.	MRPL11;NPAS4	PELI3
chr11	66703862	66704141	280	66703931	18.13	9.25272	4.78244	5.50444	FTE1_peak_932	chr11_66703862_66704141	PC	.	.
chr11	66738312	66738507	196	66738411	23.76	16.3828	7.67635	11.9825	FTE1_peak_933	chr11_66738312_66738507	.	PC	C11orf86
chr11	66801467	66801641	175	66801551	25.01	20.2907	9.04576	15.6363	FTE1_peak_934	chr11_66801467_66801641	SYT12	.	RHOD
chr11	68227521	68227651	131	68227565	23.76	11.8761	5.3527	7.88347	FTE1_peak_935	chr11_68227521_68227651	.	LRP5	PPP6R3
chr11	70952305	70952690	386	70952514	16.25	13.0158	7.42119	8.90469	FTE1_peak_936	chr11_70952305_70952690	.	SHANK2	.
chr11	70998141	70998301	161	70998240	25.63	12.6201	5.32635	8.52686	FTE1_peak_937	chr11_70998141_70998301	.	.	.
chr11	71783433	71783595	163	71783554	21.88	16.4297	8.32027	12.024	FTE1_peak_938	chr11_71783433_71783595	NUMA1	MIR3165	LAMTOR1;LRTOMT
chr11	71852209	71852412	204	71852336	22.51	17.5499	8.5476	13.077	FTE1_peak_939	chr11_71852209_71852412	.	C11orf51;FOLR3	.
chr11	72686878	72687195	318	72686993	18.13	12.1886	6.37659	8.17106	FTE1_peak_940	chr11_72686878_72687195	FCHSD2	.	.
chr11	73850858	73851029	172	73850965	18.75	15.8213	8.81944	11.4425	FTE1_peak_941	chr11_73850858_73851029	C2CD3	.	.
chr11	75677612	75677806	195	75677663	17.5	14.6345	8.26124	10.362	FTE1_peak_942	chr11_75677612_75677806	UVRAG	.	.
chr11	75742184	75742334	151	75742236	12.5	9.07861	6.02844	5.34078	FTE1_peak_943	chr11_75742184_75742334	UVRAG	.	.
chr11	76481732	76481883	152	76481806	19.38	15.4837	8.15203	11.1694	FTE1_peak_944	chr11_76481732_76481883	.	.	TSKU
chr11	76979119	76979276	158	76979200	13.75	9.55984	6.21205	5.78139	FTE1_peak_945	chr11_76979119_76979276	GDPD4	.	.
chr11	78426635	78426869	235	78426779	13.13	10.1341	6.30754	6.26448	FTE1_peak_946	chr11_78426635_78426869	ODZ4	.	.
chr11	78512286	78512512	227	78512394	28.13	23.0554	9.71079	18.2388	FTE1_peak_947	chr11_78512286_78512512	ODZ4	.	.
chr11	82569958	82570107	150	82570054	13.75	9.66133	6.27813	5.8794	FTE1_peak_948	chr11_82569958_82570107	PRCP	.	.
chr11	82763066	82763265	200	82763165	11.88	8.05487	5.74934	4.40147	FTE1_peak_949	chr11_82763066_82763265	RAB30	SNORA70E	LOC100506233
chr11	84567139	84567295	157	84567198	14.38	6.17368	3.84469	2.81294	FTE1_peak_950	chr11_84567139_84567295	DLG2	.	.
chr11	85526289	85526432	144	85526374	14.38	9.26464	5.64359	5.51629	FTE1_peak_951	chr11_85526289_85526432	.	SYTL2	.
chr11	85539043	85539273	231	85539187	23.13	22.0676	10.7731	17.2871	FTE1_peak_952	chr11_85539043_85539273	.	SYTL2	CCDC83
chr11	85885151	85885290	140	85885202	15.63	11.6685	7.00173	7.68431	FTE1_peak_953	chr11_85885151_85885290	.	.	.
chr11	86013114	86013284	171	86013200	31.26	25.0969	9.9256	20.1675	FTE1_peak_954	chr11_86013114_86013284	C11orf73	EED	.
chr11	86107522	86107689	168	86107632	12.5	9.07861	6.02844	5.34078	FTE1_peak_955	chr11_86107522_86107689	CCDC81	.	.
chr11	86195285	86195505	221	86195333	15	9.31879	5.33465	5.55219	FTE1_peak_956	chr11_86195285_86195505	ME3	.	.
chr11	86235256	86235497	242	86235360	20.63	14.2141	7.21014	9.98737	FTE1_peak_957	chr11_86235256_86235497	ME3	.	.
chr11	86407143	86407324	182	86407226	21.26	19.5105	9.93584	14.8878	FTE1_peak_958	chr11_86407143_86407324	.	ME3	.
chr11	86430926	86431146	221	86431043	20.63	18.2604	9.65674	13.7189	FTE1_peak_959	chr11_86430926_86431146	.	.	.
chr11	86446697	86446976	280	86446905	20.01	7.09102	3.50088	3.57983	FTE1_peak_960	chr11_86446697_86446976	.	.	.
chr11	86454546	86454724	179	86454639	13.13	9.36281	5.82616	5.59523	FTE1_peak_961	chr11_86454546_86454724	.	.	.
chr11	86454818	86455062	245	86454971	18.75	12.1886	6.58497	8.17106	FTE1_peak_962	chr11_86454818_86455062	.	.	.
chr11	88153546	88153752	207	88153595	13.75	5.46828	3.6884	2.2132	FTE1_peak_963	chr11_88153546_88153752	.	.	.
chr11	88213433	88213758	326	88213574	23.13	22.0676	10.7731	17.2871	FTE1_peak_964	chr11_88213433_88213758	.	.	GRM5
chr11	88288391	88288565	175	88288425	11.88	8.05487	5.74934	4.40147	FTE1_peak_965	chr11_88288391_88288565	GRM5	.	.
chr11	89114347	89114532	186	89114431	20.01	10.9285	5.25131	7.01523	FTE1_peak_966	chr11_89114347_89114532	NOX4	.	.
chr11	91985190	91985377	188	91985259	14.38	11.2192	6.86574	7.25339	FTE1_peak_967	chr11_91985190_91985377	.	.	.
chr11	92002254	92002437	184	92002350	14.38	11.2192	6.86574	7.25339	FTE1_peak_968	chr11_92002254_92002437	.	.	.
chr11	92788123	92788312	190	92788235	16.25	12.1714	6.90171	8.16651	FTE1_peak_969	chr11_92788123_92788312	.	.	.
chr11	93461568	93461930	363	93461814	15	12.332	7.14484	8.24545	FTE1_peak_970	chr11_93461568_93461930	KIAA1731	SCARNA9	C11orf54;MIR1304;SNORA1;SNORA18;SNORA25;SNORA32;SNORA40;SNORA8;SNORD5;SNORD6;TAF1D
chr11	93463098	93463223	126	93463163	15	11.6685	6.7385	7.68431	FTE1_peak_971	chr11_93463098_93463223	KIAA1731	SCARNA9	C11orf54;MIR1304;SNORA1;SNORA18;SNORA25;SNORA32;SNORA40;SNORA8;SNORD5;SNORD6;TAF1D
chr11	93469413	93469686	274	93469583	11.88	7.65542	5.48005	4.10052	FTE1_peak_972	chr11_93469413_93469686	TAF1D	KIAA1731;MIR1304;SCARNA9;SNORA1;SNORA18;SNORA25;SNORA32;SNORA40;SNORA8;SNORD5;SNORD6	C11orf54
chr11	93642068	93642214	147	93642176	11.25	8.05487	5.47024	4.40147	FTE1_peak_973	chr11_93642068_93642214	.	.	.
chr11	93681459	93681617	159	93681524	21.26	19.5105	9.93584	14.8878	FTE1_peak_974	chr11_93681459_93681617	.	.	.
chr11	93869327	93869543	217	93869423	11.25	8.05487	5.47024	4.40147	FTE1_peak_975	chr11_93869327_93869543	PANX1	HEPHL1	.
chr11	94527844	94528123	280	94527891	18.13	15.8213	8.54034	11.4425	FTE1_peak_976	chr11_94527844_94528123	AMOTL1	.	.
chr11	94666635	94666763	129	94666676	12.5	9.07861	6.02844	5.34078	FTE1_peak_977	chr11_94666635_94666763	.	.	CWC15
chr11	95610582	95610775	194	95610701	10.63	7.06535	5.19114	3.5552	FTE1_peak_978	chr11_95610582_95610775	MTMR2	.	.
chr11	95889400	95889558	159	95889435	11.88	8.05487	5.74934	4.40147	FTE1_peak_979	chr11_95889400_95889558	MAML2	.	.
chr11	95890088	95890274	187	95890179	13.75	10.1341	6.58664	6.26448	FTE1_peak_980	chr11_95890088_95890274	MAML2	.	.
chr11	95894573	95894807	235	95894610	16.88	13.4709	7.98214	9.27938	FTE1_peak_981	chr11_95894573_95894807	MAML2	.	.
chr11	95921123	95921307	185	95921199	14.38	6.17368	3.84469	2.81294	FTE1_peak_982	chr11_95921123_95921307	MAML2	.	.
chr11	95921530	95921664	135	95921600	21.26	19.1705	9.72921	14.5967	FTE1_peak_983	chr11_95921530_95921664	MAML2	.	.
chr11	95996610	95996737	128	95996639	13.75	10.1341	6.58664	6.26448	FTE1_peak_984	chr11_95996610_95996737	MAML2	.	.
chr11	99196702	99196843	142	99196757	14.38	11.2192	6.86574	7.25339	FTE1_peak_985	chr11_99196702_99196843	CNTN5	.	.
chr11	101734215	101734339	125	101734274	13.75	10.1341	6.58664	6.26448	FTE1_peak_986	chr11_101734215_101734339	.	.	ANGPTL5
chr11	101737456	101737639	184	101737536	19.38	16.1879	8.58109	11.7979	FTE1_peak_987	chr11_101737456_101737639	.	.	ANGPTL5
chr11	102009386	102009754	369	102009643	19.38	17.0303	9.09854	12.5833	FTE1_peak_988	chr11_102009386_102009754	YAP1	.	.
chr11	102049130	102049308	179	102049216	17.5	13.4351	7.51456	9.27938	FTE1_peak_989	chr11_102049130_102049308	YAP1	.	.
chr11	102096732	102096987	256	102096793	16.88	13.4709	7.98214	9.27938	FTE1_peak_990	chr11_102096732_102096987	YAP1	.	.
chr11	102194676	102194850	175	102194754	11.88	8.05487	5.74934	4.40147	FTE1_peak_991	chr11_102194676_102194850	BIRC3	.	BIRC2
chr11	102326761	102326938	178	102326858	15	8.66925	4.96246	4.98175	FTE1_peak_992	chr11_102326761_102326938	.	TMEM123	.
chr11	102631100	102631469	370	102631359	15.63	6.9063	4.15728	3.49389	FTE1_peak_993	chr11_102631100_102631469	.	.	LOC100288077;MMP1;MMP10
chr11	102867202	102867396	195	102867279	12.5	9.07861	6.02844	5.34078	FTE1_peak_994	chr11_102867202_102867396	.	.	.
chr11	103496179	103496374	196	103496297	18.13	9.25272	4.78244	5.50444	FTE1_peak_995	chr11_103496179_103496374	.	.	.
chr11	104565537	104565698	162	104565691	13.75	5.46828	3.6884	2.2132	FTE1_peak_996	chr11_104565537_104565698	.	.	.
chr11	104763920	104764175	256	104764073	14.38	10.6003	6.47527	6.70108	FTE1_peak_997	chr11_104763920_104764175	CASP12	.	LOC643733
chr11	105115245	105115444	200	105115326	17.5	14.6345	8.26124	10.362	FTE1_peak_998	chr11_105115245_105115444	.	.	.
chr11	106239564	106239693	130	106239599	15	12.332	7.14484	8.24545	FTE1_peak_999	chr11_106239564_106239693	.	.	.
chr11	107432404	107432586	183	107432476	16.88	12.1714	7.15177	8.16651	FTE1_peak_1000	chr11_107432404_107432586	ALKBH8	.	ELMOD1;LOC643923
chr11	108190437	108190561	125	108190532	11.88	8.05487	5.74934	4.40147	FTE1_peak_1001	chr11_108190437_108190561	ATM	.	.
chr11	108303668	108303870	203	108303774	21.26	19.5105	9.93584	14.8878	FTE1_peak_1002	chr11_108303668_108303870	C11orf65	.	.
chr11	108430599	108430919	321	108430845	15	12.332	7.14484	8.24545	FTE1_peak_1003	chr11_108430599_108430919	EXPH5	.	.
chr11	109418474	109418710	237	109418598	30.63	25.4237	10.5443	20.4783	FTE1_peak_1004	chr11_109418474_109418710	.	.	.
chr11	111428619	111428753	135	111428692	16.88	13.4709	7.98214	9.27938	FTE1_peak_1005	chr11_111428619_111428753	LAYN	C11orf88	.
chr11	111565651	111565831	181	111565756	18.75	15.8213	8.81944	11.4425	FTE1_peak_1006	chr11_111565651_111565831	SIK2	.	.
chr11	111712106	111712257	152	111712180	13.13	10.1341	6.30754	6.26448	FTE1_peak_1007	chr11_111712106_111712257	ALG9	.	.
chr11	114005523	114005990	468	114005678	20.63	14.2141	7.21014	9.98737	FTE1_peak_1008	chr11_114005523_114005990	ZBTB16	.	.
chr11	114020843	114020991	149	114020890	15	12.332	7.14484	8.24545	FTE1_peak_1009	chr11_114020843_114020991	ZBTB16	.	.
chr11	114025326	114025559	234	114025420	11.88	7.24361	5.20328	3.72359	FTE1_peak_1010	chr11_114025326_114025559	ZBTB16	.	.
chr11	114032792	114032937	146	114032816	11.25	7.61235	5.18644	4.05862	FTE1_peak_1011	chr11_114032792_114032937	ZBTB16	.	.
chr11	114033581	114033808	228	114033661	20.63	8.71601	4.32608	5.02614	FTE1_peak_1012	chr11_114033581_114033808	ZBTB16	.	.
chr11	114049852	114050126	275	114050052	17.5	14.6345	8.26124	10.362	FTE1_peak_1013	chr11_114049852_114050126	ZBTB16	.	.
chr11	114068603	114068955	353	114068857	16.25	10.2513	5.75142	6.36151	FTE1_peak_1014	chr11_114068603_114068955	ZBTB16	.	.
chr11	114165835	114166077	243	114166022	20.01	10.9285	5.25131	7.01523	FTE1_peak_1015	chr11_114165835_114166077	.	.	NNMT
chr11	114167021	114167314	294	114167071	15.63	10.9584	6.55334	7.04407	FTE1_peak_1016	chr11_114167021_114167314	NNMT	.	.
chr11	114237670	114237827	158	114237783	13.13	9.08114	5.65138	5.34078	FTE1_peak_1017	chr11_114237670_114237827	.	.	C11orf71
chr11	116680183	116680578	396	116680467	18.75	13.748	7.52568	9.54549	FTE1_peak_1018	chr11_116680183_116680578	.	APOA5;ZNF259	APOA1;APOA4;APOC3
chr11	116855415	116855553	139	116855489	15.63	10.9584	6.55334	7.04407	FTE1_peak_1019	chr11_116855415_116855553	SIK3	.	.
chr11	116943260	116943545	286	116943422	31.88	27.4731	11.4377	22.4217	FTE1_peak_1020	chr11_116943260_116943545	SIK3	.	.
chr11	118790445	118790775	331	118790718	16.25	8.17703	4.58585	4.51876	FTE1_peak_1021	chr11_118790445_118790775	.	BCL9L;CXCR5;MIR4492	.
chr11	120215157	120215290	134	120215248	17.5	11.2084	6.1682	7.25339	FTE1_peak_1022	chr11_120215157_120215290	ARHGEF12	POU2F3;TMEM136	.
chr11	120302852	120303098	247	120303011	16.88	13.4709	7.98214	9.27938	FTE1_peak_1023	chr11_120302852_120303098	ARHGEF12	.	.
chr11	121466598	121466814	217	121466694	22.51	16.3197	7.8353	11.9212	FTE1_peak_1024	chr11_121466598_121466814	SORL1	.	.
chr11	121699943	121700132	190	121700015	14.38	10.6003	6.47527	6.70108	FTE1_peak_1025	chr11_121699943_121700132	.	.	.
chr11	121836149	121836294	146	121836219	15	12.332	7.14484	8.24545	FTE1_peak_1026	chr11_121836149_121836294	.	.	.
chr11	121909374	121909498	125	121909426	11.88	8.05487	5.74934	4.40147	FTE1_peak_1027	chr11_121909374_121909498	.	.	.
chr11	121915986	121916123	138	121916035	14.38	7.74577	4.73193	4.18192	FTE1_peak_1028	chr11_121915986_121916123	.	.	.
chr11	121958269	121958482	214	121958437	11.88	8.05487	5.74934	4.40147	FTE1_peak_1029	chr11_121958269_121958482	.	.	BLID;MIR100HG;MIR125B1
chr11	121966513	121966637	125	121966616	13.75	10.1341	6.58664	6.26448	FTE1_peak_1030	chr11_121966513_121966637	MIR100HG	.	BLID;MIR125B1
chr11	121966824	121966984	161	121966910	18.13	15.8213	8.54034	11.4425	FTE1_peak_1031	chr11_121966824_121966984	MIR100HG	.	BLID;MIR125B1
chr11	122011334	122011517	184	122011405	13.75	10.1341	6.58664	6.26448	FTE1_peak_1032	chr11_122011334_122011517	MIR100HG	BLID	MIR100;MIRLET7A2
chr11	122027785	122027949	165	122027860	12.5	6.99778	4.69679	3.5552	FTE1_peak_1033	chr11_122027785_122027949	MIR100HG	MIR100;MIRLET7A2	.
chr11	122032925	122033107	183	122033021	24.38	23.0848	11.1567	18.2678	FTE1_peak_1034	chr11_122032925_122033107	MIR100HG	MIR100;MIRLET7A2	.
chr11	122051125	122051574	450	122051491	15	9.31879	5.33465	5.55219	FTE1_peak_1035	chr11_122051125_122051574	MIR100HG	MIR100	.
chr11	122060041	122060168	128	122060059	15	8.94824	5.12126	5.25007	FTE1_peak_1036	chr11_122060041_122060168	MIR100HG	.	.
chr11	122067773	122068096	324	122067979	20.63	18.2604	9.65674	13.7189	FTE1_peak_1037	chr11_122067773_122068096	MIR100HG	.	.
chr11	122078786	122079210	425	122079008	25.63	20.2907	9.26321	15.6363	FTE1_peak_1038	chr11_122078786_122079210	.	MIR100HG	.
chr11	122539605	122539771	167	122539696	12.5	8.14997	5.42845	4.49213	FTE1_peak_1039	chr11_122539605_122539771	UBASH3B	.	.
chr11	122577543	122577667	125	122577561	16.88	11.7885	6.90992	7.80089	FTE1_peak_1040	chr11_122577543_122577667	UBASH3B	.	.
chr11	122619816	122620022	207	122619909	17.5	13.7509	7.71025	9.5481	FTE1_peak_1041	chr11_122619816_122620022	UBASH3B	.	.
chr11	122925042	122925223	182	122925103	12.5	9.03697	6.00146	5.33408	FTE1_peak_1042	chr11_122925042_122925223	.	.	CLMP;HSPA8
chr11	123044046	123044296	251	123044255	13.13	10.1341	6.30754	6.26448	FTE1_peak_1043	chr11_123044046_123044296	CLMP	.	.
chr11	123045423	123045679	257	123045521	26.88	26.0341	12.4477	21.0394	FTE1_peak_1044	chr11_123045423_123045679	CLMP	.	.
chr11	124050161	124050319	159	124050264	16.25	13.4709	7.70304	9.27938	FTE1_peak_1045	chr11_124050161_124050319	.	.	.
chr11	124155567	124155738	172	124155667	21.26	11.7967	5.56389	7.8066	FTE1_peak_1046	chr11_124155567_124155738	.	OR8G1;OR8G5	OR8D1
chr11	124155842	124156294	453	124156220	25.63	20.2907	9.26321	15.6363	FTE1_peak_1047	chr11_124155842_124156294	.	OR8G1;OR8G5	OR8D1
chr11	124167985	124168137	153	124168049	16.25	12.1714	6.90171	8.16651	FTE1_peak_1048	chr11_124167985_124168137	.	.	OR8D1;OR8D2
chr11	124640118	124640356	239	124640241	21.88	17.799	9.1523	13.3191	FTE1_peak_1049	chr11_124640118_124640356	MSANTD2	ESAM;NRGN;VSIG2	.
chr11	126861990	126862139	150	126862084	15.63	12.332	7.42394	8.24545	FTE1_peak_1050	chr11_126861990_126862139	KIRREL3	MIR3167	KIRREL3-AS3
chr11	126862791	126862923	133	126862889	13.13	10.1341	6.30754	6.26448	FTE1_peak_1051	chr11_126862791_126862923	KIRREL3	MIR3167	KIRREL3-AS3
chr11	127866809	127867003	195	127866840	11.88	8.05487	5.74934	4.40147	FTE1_peak_1052	chr11_127866809_127867003	.	.	.
chr11	127896444	127896786	343	127896683	22.51	20.7799	10.494	16.0826	FTE1_peak_1053	chr11_127896444_127896786	.	.	.
chr11	127909208	127909332	125	127909230	10.63	7.06535	5.19114	3.5552	FTE1_peak_1054	chr11_127909208_127909332	.	.	.
chr11	128077676	128078174	499	128078047	39.39	30.0967	10.0963	24.9334	FTE1_peak_1055	chr11_128077676_128078174	.	.	.
chr11	128278025	128278244	220	128278145	17.5	8.44714	4.62615	4.77024	FTE1_peak_1056	chr11_128278025_128278244	.	.	.
chr11	128290950	128291149	200	128291043	15	12.332	7.14484	8.24545	FTE1_peak_1057	chr11_128290950_128291149	.	.	.
chr11	128351170	128351356	187	128351253	16.25	10.2513	5.75142	6.36151	FTE1_peak_1058	chr11_128351170_128351356	ETS1	.	.
chr11	128367087	128367212	126	128367092	13.13	7.53305	4.70948	3.98652	FTE1_peak_1059	chr11_128367087_128367212	ETS1	.	.
chr11	128579407	128579575	169	128579469	23.76	22.0676	11.0522	17.2871	FTE1_peak_1060	chr11_128579407_128579575	FLI1	LOC100507392	.
chr11	128584884	128585131	248	128584956	21.26	6.40804	3.17937	3.03573	FTE1_peak_1061	chr11_128584884_128585131	FLI1	LOC100507392	.
chr11	128585520	128585804	285	128585604	24.38	23.373	11.3313	18.5309	FTE1_peak_1062	chr11_128585520_128585804	FLI1	LOC100507392	.
chr11	129013313	129013475	163	129013396	16.88	10.2513	5.95981	6.36151	FTE1_peak_1063	chr11_129013313_129013475	ARHGAP32	.	.
chr11	129973339	129973614	276	129973558	14.38	11.2192	6.86574	7.25339	FTE1_peak_1064	chr11_129973339_129973614	APLP2	.	.
chr11	130253545	130253711	167	130253628	22.51	20.7799	10.494	16.0826	FTE1_peak_1065	chr11_130253545_130253711	.	.	ADAMTS8
chr11	130516489	130516727	239	130516612	22.51	16.3197	7.8353	11.9212	FTE1_peak_1066	chr11_130516489_130516727	.	.	.
chr11	130642549	130642773	225	130642673	23.76	22.0676	11.0522	17.2871	FTE1_peak_1067	chr11_130642549_130642773	.	.	.
chr11	130717586	130717807	222	130717726	23.13	22.0676	10.7731	17.2871	FTE1_peak_1068	chr11_130717586_130717807	.	.	SNX19
chr11	130767210	130767424	215	130767319	23.13	7.60524	3.4473	4.05226	FTE1_peak_1069	chr11_130767210_130767424	SNX19	.	.
chr11	130870474	130870599	126	130870505	15.63	12.332	7.42394	8.24545	FTE1_peak_1070	chr11_130870474_130870599	.	.	.
chr11	131618905	131619155	251	131619133	11.25	6.79844	4.66779	3.39491	FTE1_peak_1071	chr11_131618905_131619155	NTM	.	.
chr11	131630049	131630264	216	131630207	15.63	12.2799	7.39071	8.24545	FTE1_peak_1072	chr11_131630049_131630264	NTM	.	.
chr11	131924761	131925002	242	131924847	26.26	21.8976	9.7346	17.1609	FTE1_peak_1073	chr11_131924761_131925002	NTM	.	.
chr11	131934789	131935165	377	131935050	19.38	17.0303	9.09854	12.5833	FTE1_peak_1074	chr11_131934789_131935165	NTM	.	.
chr11	131942133	131942391	259	131942195	19.38	17.0303	9.09854	12.5833	FTE1_peak_1075	chr11_131942133_131942391	NTM	.	.
chr11	132474407	132474638	232	132474482	13.75	10.1341	6.58664	6.26448	FTE1_peak_1076	chr11_132474407_132474638	OPCML	.	.
chr11	132555246	132555512	267	132555410	17.5	14.6345	8.26124	10.362	FTE1_peak_1077	chr11_132555246_132555512	OPCML	.	.
chr11	132715046	132715219	174	132715053	10	7.06535	4.91204	3.5552	FTE1_peak_1078	chr11_132715046_132715219	OPCML	.	.
chr11	134819093	134819269	177	134819204	21.88	11.7967	5.72019	7.8066	FTE1_peak_1079	chr11_134819093_134819269	.	.	.
chr12	741600	741778	179	741666	16.88	9.81647	5.69862	6.02957	FTE1_peak_1080	chr12_741600_741778	NINJ2	.	.
chr12	1459602	1459785	184	1459662	16.25	13.4709	7.70304	9.27938	FTE1_peak_1081	chr12_1459602_1459785	ERC1	.	.
chr12	1583435	1583589	155	1583493	16.88	12.1714	7.15177	8.16651	FTE1_peak_1082	chr12_1583435_1583589	ERC1	.	LOC100292680
chr12	2374166	2374400	235	2374287	20.01	8.71601	4.20105	5.02614	FTE1_peak_1083	chr12_2374166_2374400	CACNA1C	.	.
chr12	2378214	2378363	150	2378247	15	6.9063	4.00098	3.49389	FTE1_peak_1084	chr12_2378214_2378363	CACNA1C	.	.
chr12	5205400	5205578	179	5205492	19.38	17.0303	9.09854	12.5833	FTE1_peak_1085	chr12_5205400_5205578	.	.	.
chr12	5211778	5211909	132	5211850	13.13	10.1341	6.30754	6.26448	FTE1_peak_1086	chr12_5211778_5211909	.	.	.
chr12	6647974	6648182	209	6648027	23.13	9.45786	4.16952	5.68902	FTE1_peak_1087	chr12_6647974_6648182	.	GAPDH;NCAPD2;SCARNA10	IFFO1;NOP2
chr12	6961575	6961758	184	6961659	61.89	23.0399	4.70215	18.2326	FTE1_peak_1088	chr12_6961575_6961758	USP5	CDCA3;GNB3;GPR162;LEPREL2	SPSB2;TPI1
chr12	7052976	7053512	537	7053153	37.51	24.6402	8.17185	19.7499	FTE1_peak_1089	chr12_7052976_7053512	C12orf57	ATN1;ENO2;LRRC23	EMG1;MIR141;MIR200C;PHB2;PTPN6;SCARNA12
chr12	7586022	7586146	125	7586060	16.88	10.2513	5.95981	6.36151	FTE1_peak_1090	chr12_7586022_7586146	CD163L1	.	.
chr12	8833835	8834127	293	8834027	18.75	12.9759	7.05533	8.86559	FTE1_peak_1091	chr12_8833835_8834127	.	MFAP5	RIMKLB
chr12	9945565	9945812	248	9945731	13.13	7.53305	4.70948	3.98652	FTE1_peak_1092	chr12_9945565_9945812	MIR1244-1;MIR1244-2;MIR1244-3	.	.
chr12	10357839	10358162	324	10358072	11.88	7.16595	5.15125	3.64882	FTE1_peak_1093	chr12_10357839_10358162	MIR1244-1;MIR1244-2;MIR1244-3	C12orf59	GABARAPL1
chr12	10787002	10787340	339	10787198	60.64	67.8534	21.4403	61.4336	FTE1_peak_1094	chr12_10787002_10787340	MIR1244-1;MIR1244-2;MIR1244-3;STYK1	MAGOHB	.
chr12	11916852	11917090	239	11916973	24.38	18.4988	8.46047	13.9453	FTE1_peak_1095	chr12_11916852_11917090	ETV6;MIR1244-1;MIR1244-2;MIR1244-3	.	.
chr12	11950615	11950739	125	11950707	13.13	9.55984	5.94882	5.78139	FTE1_peak_1096	chr12_11950615_11950739	ETV6;MIR1244-1;MIR1244-2;MIR1244-3	.	.
chr12	11951855	11952105	251	11951962	17.5	14.6345	8.26124	10.362	FTE1_peak_1097	chr12_11951855_11952105	ETV6;MIR1244-1;MIR1244-2;MIR1244-3	.	.
chr12	12972700	12972889	190	12972773	13.13	10.089	6.27931	6.26448	FTE1_peak_1098	chr12_12972700_12972889	DDX47;MIR1244-1;MIR1244-2;MIR1244-3	APOLD1	.
chr12	12976196	12976502	307	12976390	23.13	21.0461	10.1605	16.3365	FTE1_peak_1099	chr12_12976196_12976502	DDX47;MIR1244-1;MIR1244-2;MIR1244-3	.	.
chr12	13025086	13025238	153	13025141	13.13	5.46828	3.53211	2.2132	FTE1_peak_1100	chr12_13025086_13025238	MIR1244-1;MIR1244-2;MIR1244-3	.	GPRC5A;RPL13AP20
chr12	13052428	13052637	210	13052602	10.63	6.43695	4.77038	3.0636	FTE1_peak_1101	chr12_13052428_13052637	GPRC5A;MIR1244-1;MIR1244-2;MIR1244-3	RPL13AP20	MIR614
chr12	13055150	13055275	126	13055224	11.88	7.61235	5.45106	4.05862	FTE1_peak_1102	chr12_13055150_13055275	GPRC5A;MIR1244-1;MIR1244-2;MIR1244-3	RPL13AP20	MIR614
chr12	13288858	13289034	177	13288927	14.38	8.41215	5.12626	4.73758	FTE1_peak_1103	chr12_13288858_13289034	MIR1244-1;MIR1244-2;MIR1244-3	.	.
chr12	13326700	13326824	125	13326808	13.13	9.55984	5.94882	5.78139	FTE1_peak_1104	chr12_13326700_13326824	MIR1244-1;MIR1244-2;MIR1244-3	.	EMP1
chr12	13376248	13376372	125	13376324	11.25	8.05487	5.47024	4.40147	FTE1_peak_1105	chr12_13376248_13376372	MIR1244-1;MIR1244-2;MIR1244-3	EMP1	.
chr12	14989291	14989500	210	14989403	23.76	22.0676	11.0522	17.2871	FTE1_peak_1106	chr12_14989291_14989500	ART4;MIR1244-1;MIR1244-2;MIR1244-3	C12orf60;C12orf69	.
chr12	14994800	14995057	258	14994896	19.38	17.0303	9.09854	12.5833	FTE1_peak_1107	chr12_14994800_14995057	ART4;MIR1244-1;MIR1244-2;MIR1244-3	C12orf60;C12orf69	.
chr12	15782001	15782386	386	15782178	19.38	17.0303	9.09854	12.5833	FTE1_peak_1108	chr12_15782001_15782386	EPS8;MIR1244-1;MIR1244-2;MIR1244-3	.	.
chr12	15853600	15853834	235	15853720	13.13	7.53305	4.70948	3.98652	FTE1_peak_1109	chr12_15853600_15853834	EPS8;MIR1244-1;MIR1244-2;MIR1244-3	.	.
chr12	16131661	16131891	231	16131773	15	12.332	7.14484	8.24545	FTE1_peak_1110	chr12_16131661_16131891	DERA;MIR1244-1;MIR1244-2;MIR1244-3	.	.
chr12	16132770	16132944	175	16132771	11.25	5.86499	4.08432	2.57335	FTE1_peak_1111	chr12_16132770_16132944	DERA;MIR1244-1;MIR1244-2;MIR1244-3	.	.
chr12	16501969	16502209	241	16502128	18.13	14.6826	7.84811	10.4092	FTE1_peak_1112	chr12_16501969_16502209	MGST1;MIR1244-1;MIR1244-2;MIR1244-3	.	.
chr12	18324515	18324787	273	18324674	26.26	26.0341	12.1686	21.0394	FTE1_peak_1113	chr12_18324515_18324787	MIR1244-1;MIR1244-2;MIR1244-3	.	.
chr12	18473080	18473233	154	18473167	18.13	15.8213	8.54034	11.4425	FTE1_peak_1114	chr12_18473080_18473233	MIR1244-1;MIR1244-2;MIR1244-3;PIK3C2G	.	.
chr12	18536108	18536495	388	18536267	46.26	55.3893	21.0054	49.4293	FTE1_peak_1115	chr12_18536108_18536495	MIR1244-1;MIR1244-2;MIR1244-3;PIK3C2G	.	.
chr12	18900988	18901181	194	18901022	14.38	11.2192	6.86574	7.25339	FTE1_peak_1116	chr12_18900988_18901181	MIR1244-1;MIR1244-2;MIR1244-3	CAPZA3;PLCZ1	.
chr12	19151934	19152115	182	19152013	21.26	19.4374	9.89137	14.8527	FTE1_peak_1117	chr12_19151934_19152115	MIR1244-1;MIR1244-2;MIR1244-3	.	.
chr12	20661249	20661511	263	20661391	18.13	12.1886	6.37659	8.17106	FTE1_peak_1118	chr12_20661249_20661511	MIR1244-1;MIR1244-2;MIR1244-3;PDE3A	.	.
chr12	22429012	22429136	125	22429100	12.5	9.07861	6.02844	5.34078	FTE1_peak_1119	chr12_22429012_22429136	MIR1244-1;MIR1244-2;MIR1244-3;ST8SIA1	.	.
chr12	22630208	22630396	189	22630308	16.88	13.4709	7.98214	9.27938	FTE1_peak_1120	chr12_22630208_22630396	KIAA0528;MIR1244-1;MIR1244-2;MIR1244-3	.	.
chr12	24754005	24754203	199	24754114	18.13	15.8213	8.54034	11.4425	FTE1_peak_1121	chr12_24754005_24754203	MIR1244-1;MIR1244-2;MIR1244-3	LINC00477	.
chr12	24975060	24975260	201	24975176	15	12.332	7.14484	8.24545	FTE1_peak_1122	chr12_24975060_24975260	BCAT1;MIR1244-1;MIR1244-2;MIR1244-3	.	.
chr12	26306351	26306531	181	26306422	12.5	6.6833	4.50109	3.28667	FTE1_peak_1123	chr12_26306351_26306531	MIR1244-1;MIR1244-2;MIR1244-3	BHLHE41	.
chr12	26801647	26801771	125	26801715	13.13	10.089	6.27931	6.26448	FTE1_peak_1124	chr12_26801647_26801771	ITPR2;MIR1244-1;MIR1244-2;MIR1244-3	.	.
chr12	26850245	26850452	208	26850350	21.88	11.7967	5.72019	7.8066	FTE1_peak_1125	chr12_26850245_26850452	ITPR2;MIR1244-1;MIR1244-2;MIR1244-3	.	.
chr12	27329920	27330046	127	27329966	14.38	10.878	6.65028	6.9689	FTE1_peak_1126	chr12_27329920_27330046	MIR1244-1;MIR1244-2;MIR1244-3	.	.
chr12	27702807	27702938	132	27702861	15	12.332	7.14484	8.24545	FTE1_peak_1127	chr12_27702807_27702938	MIR1244-1;MIR1244-2;MIR1244-3;PPFIBP1	.	.
chr12	27726894	27727189	296	27727121	16.25	7.66459	4.31357	4.10596	FTE1_peak_1128	chr12_27726894_27727189	MIR1244-1;MIR1244-2;MIR1244-3;PPFIBP1	.	.
chr12	27780165	27780327	163	27780241	18.75	15.8213	8.81944	11.4425	FTE1_peak_1129	chr12_27780165_27780327	MIR1244-1;MIR1244-2;MIR1244-3;PPFIBP1	.	.
chr12	28018492	28018630	139	28018559	22.51	12.6839	5.87648	8.58545	FTE1_peak_1130	chr12_28018492_28018630	MIR1244-1;MIR1244-2;MIR1244-3	.	.
chr12	28052356	28052489	134	28052391	13.75	10.1341	6.58664	6.26448	FTE1_peak_1131	chr12_28052356_28052489	MIR1244-1;MIR1244-2;MIR1244-3	.	.
chr12	28176616	28176763	148	28176664	14.38	9.61323	5.85858	5.8322	FTE1_peak_1132	chr12_28176616_28176763	MIR1244-1;MIR1244-2;MIR1244-3	.	.
chr12	28283744	28283883	140	28283812	14.38	10.6003	6.47527	6.70108	FTE1_peak_1133	chr12_28283744_28283883	MIR1244-1;MIR1244-2;MIR1244-3	.	.
chr12	28689154	28689283	130	28689203	16.88	13.4153	7.94641	9.27938	FTE1_peak_1134	chr12_28689154_28689283	CCDC91;MIR1244-1;MIR1244-2;MIR1244-3	.	.
chr12	29894571	29894735	165	29894655	18.13	9.25272	4.78244	5.50444	FTE1_peak_1135	chr12_29894571_29894735	MIR1244-1;MIR1244-2;MIR1244-3;TMTC1	.	.
chr12	29896913	29897096	184	29897018	18.75	15.8213	8.81944	11.4425	FTE1_peak_1136	chr12_29896913_29897096	MIR1244-1;MIR1244-2;MIR1244-3;TMTC1	.	.
chr12	29949821	29949981	161	29949898	12.5	9.07861	6.02844	5.34078	FTE1_peak_1137	chr12_29949821_29949981	MIR1244-1;MIR1244-2;MIR1244-3	TMTC1	.
chr12	30179559	30179712	154	30179647	18.13	15.8213	8.54034	11.4425	FTE1_peak_1138	chr12_30179559_30179712	MIR1244-1;MIR1244-2;MIR1244-3	.	.
chr12	30482309	30482493	185	30482381	19.38	7.99138	4.07602	4.40147	FTE1_peak_1139	chr12_30482309_30482493	MIR1244-1;MIR1244-2;MIR1244-3	.	.
chr12	31671679	31672036	358	31671893	27.51	21.8929	9.50241	17.1565	FTE1_peak_1140	chr12_31671679_31672036	DENND5B;MIR1244-1;MIR1244-2;MIR1244-3	.	.
chr12	32268781	32268917	137	32268878	13.75	9.46036	6.14734	5.68968	FTE1_peak_1141	chr12_32268781_32268917	BICD1;MIR1244-1;MIR1244-2;MIR1244-3	.	.
chr12	32590007	32590164	158	32590089	22.51	12.6839	5.87648	8.58545	FTE1_peak_1142	chr12_32590007_32590164	MIR1244-1;MIR1244-2;MIR1244-3	.	.
chr12	32686735	32687346	612	32686850	25.63	23.2961	11.0391	18.4716	FTE1_peak_1143	chr12_32686735_32687346	FGD4;MIR1244-1;MIR1244-2;MIR1244-3	.	.
chr12	39999867	40000026	160	39999964	18.75	7.28745	3.95098	3.76508	FTE1_peak_1144	chr12_39999867_40000026	ABCD2;MIR1244-1;MIR1244-2;MIR1244-3	.	C12orf40
chr12	42958476	42958618	143	42958544	20.63	14.2141	7.21014	9.98737	FTE1_peak_1145	chr12_42958476_42958618	MIR1244-1;MIR1244-2;MIR1244-3;PRICKLE1	.	.
chr12	43150910	43151149	240	43150963	20.63	18.2604	9.65674	13.7189	FTE1_peak_1146	chr12_43150910_43151149	MIR1244-1;MIR1244-2;MIR1244-3	.	.
chr12	43355315	43355449	135	43355348	15	12.332	7.14484	8.24545	FTE1_peak_1147	chr12_43355315_43355449	MIR1244-1;MIR1244-2;MIR1244-3	.	.
chr12	43679201	43679369	169	43679274	25.01	19.6141	8.66885	14.9783	FTE1_peak_1148	chr12_43679201_43679369	MIR1244-1;MIR1244-2;MIR1244-3	.	.
chr12	46613756	46613984	229	46613846	21.26	19.5105	9.93584	14.8878	FTE1_peak_1149	chr12_46613756_46613984	MIR1244-1;MIR1244-2;MIR1244-3;SLC38A1	.	.
chr12	46750989	46752129	1141	46751432	41.89	47.7508	19.1461	41.9918	FTE1_peak_1150	chr12_46750989_46752129	MIR1244-1;MIR1244-2;MIR1244-3;SLC38A2	.	.
chr12	46752334	46752714	381	46752359	15	6.9063	4.00098	3.49389	FTE1_peak_1151	chr12_46752334_46752714	MIR1244-1;MIR1244-2;MIR1244-3;SLC38A2	.	.
chr12	46753149	46753323	175	46753246	12.5	9.07861	6.02844	5.34078	FTE1_peak_1152	chr12_46753149_46753323	MIR1244-1;MIR1244-2;MIR1244-3;SLC38A2	.	.
chr12	46756757	46756983	227	46756844	13.75	10.1341	6.58664	6.26448	FTE1_peak_1153	chr12_46756757_46756983	MIR1244-1;MIR1244-2;MIR1244-3;SLC38A2	.	.
chr12	46757695	46757947	253	46757902	14.38	10.6003	6.47527	6.70108	FTE1_peak_1154	chr12_46757695_46757947	MIR1244-1;MIR1244-2;MIR1244-3;SLC38A2	.	.
chr12	46758075	46758228	154	46758125	13.75	10.1341	6.58664	6.26448	FTE1_peak_1155	chr12_46758075_46758228	MIR1244-1;MIR1244-2;MIR1244-3;SLC38A2	.	.
chr12	46758413	46758609	197	46758460	13.13	10.1341	6.30754	6.26448	FTE1_peak_1156	chr12_46758413_46758609	MIR1244-1;MIR1244-2;MIR1244-3;SLC38A2	.	.
chr12	46758839	46759047	209	46758879	13.13	10.1341	6.30754	6.26448	FTE1_peak_1157	chr12_46758839_46759047	MIR1244-1;MIR1244-2;MIR1244-3;SLC38A2	.	.
chr12	46759746	46760539	794	46760491	14.38	11.2192	6.86574	7.25339	FTE1_peak_1158	chr12_46759746_46760539	MIR1244-1;MIR1244-2;MIR1244-3;SLC38A2	.	.
chr12	46761864	46762045	182	46761972	17.5	9.98236	5.46261	6.18975	FTE1_peak_1159	chr12_46761864_46762045	MIR1244-1;MIR1244-2;MIR1244-3;SLC38A2	.	.
chr12	46762451	46762576	126	46762514	17.5	9.6008	5.24953	5.82186	FTE1_peak_1160	chr12_46762451_46762576	MIR1244-1;MIR1244-2;MIR1244-3;SLC38A2	.	.
chr12	46763351	46763957	607	46763862	21.26	13.3748	6.38153	9.24495	FTE1_peak_1161	chr12_46763351_46763957	MIR1244-1;MIR1244-2;MIR1244-3;SLC38A2	.	.
chr12	46780362	46780551	190	46780481	13.75	5.98896	3.98746	2.68866	FTE1_peak_1162	chr12_46780362_46780551	MIR1244-1;MIR1244-2;MIR1244-3	SLC38A2	.
chr12	46783165	46783332	168	46783264	25.01	24.6954	11.6104	19.7748	FTE1_peak_1163	chr12_46783165_46783332	MIR1244-1;MIR1244-2;MIR1244-3	SLC38A2	.
chr12	46824320	46824483	164	46824406	13.13	8.64478	5.38227	4.95754	FTE1_peak_1164	chr12_46824320_46824483	MIR1244-1;MIR1244-2;MIR1244-3	.	.
chr12	46825645	46825861	217	46825725	13.75	9.55984	6.21205	5.78139	FTE1_peak_1165	chr12_46825645_46825861	MIR1244-1;MIR1244-2;MIR1244-3	.	.
chr12	46888273	46888468	196	46888375	21.88	19.5105	10.2149	14.8878	FTE1_peak_1166	chr12_46888273_46888468	MIR1244-1;MIR1244-2;MIR1244-3	.	.
chr12	47167843	47168109	267	47167953	20.63	18.2604	9.65674	13.7189	FTE1_peak_1167	chr12_47167843_47168109	MIR1244-1;MIR1244-2;MIR1244-3;SLC38A4	.	.
chr12	47180583	47180707	125	47180644	14.38	11.2192	6.86574	7.25339	FTE1_peak_1168	chr12_47180583_47180707	MIR1244-1;MIR1244-2;MIR1244-3;SLC38A4	.	.
chr12	47479692	47479816	125	47479719	13.13	10.1341	6.30754	6.26448	FTE1_peak_1169	chr12_47479692_47479816	MIR1244-1;MIR1244-2;MIR1244-3	AMIGO2	.
chr12	47489602	47489861	260	47489746	19.38	7.99138	4.07602	4.40147	FTE1_peak_1170	chr12_47489602_47489861	MIR1244-1;MIR1244-2;MIR1244-3	AMIGO2	.
chr12	47665222	47665350	129	47665286	13.13	10.1341	6.30754	6.26448	FTE1_peak_1171	chr12_47665222_47665350	MIR1244-1;MIR1244-2;MIR1244-3	.	.
chr12	47672050	47672174	125	47672102	13.13	10.1341	6.30754	6.26448	FTE1_peak_1172	chr12_47672050_47672174	MIR1244-1;MIR1244-2;MIR1244-3	.	.
chr12	48275604	48275872	269	48275718	20.01	10.9285	5.25131	7.01523	FTE1_peak_1173	chr12_48275604_48275872	MIR1244-1;MIR1244-2;MIR1244-3;VDR	.	.
chr12	49616443	49616600	158	49616544	28.13	23.0554	9.71079	18.2388	FTE1_peak_1174	chr12_49616443_49616600	MIR1244-1;MIR1244-2;MIR1244-3	.	.
chr12	49900981	49901236	256	49901088	23.13	16.8205	7.72194	12.4052	FTE1_peak_1175	chr12_49900981_49901236	MIR1244-1;MIR1244-2;MIR1244-3;SPATS2	.	.
chr12	50580974	50581106	133	50581015	13.75	8.28303	5.38945	4.61965	FTE1_peak_1176	chr12_50580974_50581106	LIMA1;MIR1244-1;MIR1244-2;MIR1244-3	CERS5	.
chr12	50596164	50596312	149	50596223	16.88	12.5194	7.37296	8.42876	FTE1_peak_1177	chr12_50596164_50596312	LIMA1;MIR1244-1;MIR1244-2;MIR1244-3	.	.
chr12	50784198	50784384	187	50784254	19.38	13.3398	6.87935	9.21114	FTE1_peak_1178	chr12_50784198_50784384	FAM186A;MIR1244-1;MIR1244-2;MIR1244-3	.	LARP4
chr12	50790422	50790574	153	50790500	21.26	12.6794	6.01502	8.58225	FTE1_peak_1179	chr12_50790422_50790574	MIR1244-1;MIR1244-2;MIR1244-3	FAM186A	LARP4
chr12	50966177	50966336	160	50966267	16.88	12.1152	7.11619	8.11568	FTE1_peak_1180	chr12_50966177_50966336	DIP2B;MIR1244-1;MIR1244-2;MIR1244-3	.	.
chr12	51180691	51180815	125	51180746	14.38	8.41215	5.12626	4.73758	FTE1_peak_1181	chr12_51180691_51180815	ATF1;MIR1244-1;MIR1244-2;MIR1244-3	.	.
chr12	52081487	52081773	287	52081583	20.63	18.2604	9.65674	13.7189	FTE1_peak_1182	chr12_52081487_52081773	MIR1244-1;MIR1244-2;MIR1244-3;SCN8A	.	.
chr12	52629261	52629396	136	52629350	18.75	10.6617	5.70539	6.75852	FTE1_peak_1183	chr12_52629261_52629396	KRT7;MIR1244-1;MIR1244-2;MIR1244-3	LOC283403;LOC283404	.
chr12	52674376	52674600	225	52674478	17.5	11.2084	6.1682	7.25339	FTE1_peak_1184	chr12_52674376_52674600	MIR1244-1;MIR1244-2;MIR1244-3	.	KRT81;KRT86
chr12	52674697	52675212	516	52674812	22.51	5.86828	2.93824	2.57659	FTE1_peak_1185	chr12_52674697_52675212	MIR1244-1;MIR1244-2;MIR1244-3	.	KRT81;KRT86
chr12	52888409	52888634	226	52888555	13.75	10.1341	6.58664	6.26448	FTE1_peak_1186	chr12_52888409_52888634	MIR1244-1;MIR1244-2;MIR1244-3	KRT6A;KRT6C	KRT5
chr12	53318997	53319200	204	53319077	16.88	11.6833	6.8438	7.69891	FTE1_peak_1187	chr12_53318997_53319200	KRT8;MIR1244-1;MIR1244-2;MIR1244-3	.	KRT18
chr12	53955492	53955643	152	53955569	15	12.332	7.14484	8.24545	FTE1_peak_1188	chr12_53955492_53955643	ATF7;MIR1244-1;MIR1244-2;MIR1244-3	.	.
chr12	54164134	54164314	181	54164242	20.63	16.6313	8.65217	12.2207	FTE1_peak_1189	chr12_54164134_54164314	MIR1244-1;MIR1244-2;MIR1244-3	.	.
chr12	54616362	54616850	489	54616468	20.63	8.71601	4.32608	5.02614	FTE1_peak_1190	chr12_54616362_54616850	MIR1244-1;MIR1244-2;MIR1244-3	.	CBX5;MIR3198-2
chr12	54673037	54673173	137	54673069	14.38	10.2847	6.27705	6.39441	FTE1_peak_1191	chr12_54673037_54673173	CBX5;MIR1244-1;MIR1244-2;MIR1244-3	.	HNRNPA1;HNRNPA1P10;NFE2
chr12	54681719	54682036	318	54681914	12.5	7.62961	5.09558	4.07563	FTE1_peak_1192	chr12_54681719_54682036	MIR1244-1;MIR1244-2;MIR1244-3	CBX5;HNRNPA1;HNRNPA1P10	NFE2
chr12	54805195	54805319	125	54805296	14.38	6.17368	3.84469	2.81294	FTE1_peak_1193	chr12_54805195_54805319	ITGA5;MIR1244-1;MIR1244-2;MIR1244-3	ZNF385A	.
chr12	56912453	56912683	231	56912539	15.63	10.1452	6.04695	6.27309	FTE1_peak_1194	chr12_56912453_56912683	MIR1244-1;MIR1244-2;MIR1244-3	.	RBMS2
chr12	58704585	58705040	456	58704695	20.01	18.2604	9.37764	13.7189	FTE1_peak_1195	chr12_58704585_58705040	MIR1244-1;MIR1244-2;MIR1244-3	.	.
chr12	58707227	58707400	174	58707344	13.75	10.1341	6.58664	6.26448	FTE1_peak_1196	chr12_58707227_58707400	MIR1244-1;MIR1244-2;MIR1244-3	.	.
chr12	58819329	58819513	185	58819438	13.75	8.24447	5.36495	4.58242	FTE1_peak_1197	chr12_58819329_58819513	MIR1244-1;MIR1244-2;MIR1244-3	.	.
chr12	58951066	58951190	125	58951088	11.88	7.56973	5.42237	4.01737	FTE1_peak_1198	chr12_58951066_58951190	MIR1244-1;MIR1244-2;MIR1244-3	.	.
chr12	59271137	59271449	313	59271258	25.63	10.5157	4.43862	6.62059	FTE1_peak_1199	chr12_59271137_59271449	LRIG3;MIR1244-1;MIR1244-2;MIR1244-3	.	.
chr12	59435214	59435517	304	59435394	30.63	14.3451	5.27217	10.1125	FTE1_peak_1200	chr12_59435214_59435517	MIR1244-1;MIR1244-2;MIR1244-3	.	.
chr12	60092549	60092734	186	60092633	17.5	11.2084	6.1682	7.25339	FTE1_peak_1201	chr12_60092549_60092734	MIR1244-1;MIR1244-2;MIR1244-3;SLC16A7	.	.
chr12	62642776	62642909	134	62642856	12.5	9.07861	6.02844	5.34078	FTE1_peak_1202	chr12_62642776_62642909	MIR1244-1;MIR1244-2;MIR1244-3	.	USP15
chr12	63086707	63086948	242	63086886	23.13	21.4114	10.3789	16.6939	FTE1_peak_1203	chr12_63086707_63086948	MIR1244-1;MIR1244-2;MIR1244-3;PPM1H	.	.
chr12	63096249	63096637	389	63096387	16.88	13.4709	7.98214	9.27938	FTE1_peak_1204	chr12_63096249_63096637	MIR1244-1;MIR1244-2;MIR1244-3;PPM1H	.	.
chr12	63124533	63124661	129	63124558	18.75	9.25272	4.93873	5.50444	FTE1_peak_1205	chr12_63124533_63124661	MIR1244-1;MIR1244-2;MIR1244-3;PPM1H	.	.
chr12	64311836	64312140	305	64311925	31.88	31.4527	13.7731	26.2355	FTE1_peak_1206	chr12_64311836_64312140	MIR1244-1;MIR1244-2;MIR1244-3;SRGAP1	.	.
chr12	64498251	64498402	152	64498357	10.63	7.06535	5.19114	3.5552	FTE1_peak_1207	chr12_64498251_64498402	MIR1244-1;MIR1244-2;MIR1244-3;SRGAP1	.	.
chr12	65294481	65294651	171	65294579	12.5	9.07861	6.02844	5.34078	FTE1_peak_1208	chr12_65294481_65294651	FLJ41278;MIR1244-1;MIR1244-2;MIR1244-3	TBC1D30	.
chr12	65824745	65824948	204	65824849	19.38	17.0303	9.09854	12.5833	FTE1_peak_1209	chr12_65824745_65824948	MIR1244-1;MIR1244-2;MIR1244-3;MSRB3	.	.
chr12	65926005	65926176	172	65926066	13.13	7.53305	4.70948	3.98652	FTE1_peak_1210	chr12_65926005_65926176	MIR1244-1;MIR1244-2;MIR1244-3	.	.
chr12	65926828	65926954	127	65926876	14.38	11.2192	6.86574	7.25339	FTE1_peak_1211	chr12_65926828_65926954	MIR1244-1;MIR1244-2;MIR1244-3	.	.
chr12	65927095	65927234	140	65927165	20.01	18.2604	9.37764	13.7189	FTE1_peak_1212	chr12_65927095_65927234	MIR1244-1;MIR1244-2;MIR1244-3	.	.
chr12	65930748	65930964	217	65930850	16.25	10.2513	5.75142	6.36151	FTE1_peak_1213	chr12_65930748_65930964	MIR1244-1;MIR1244-2;MIR1244-3	.	.
chr12	65959944	65960298	355	65960196	15	9.31879	5.33465	5.55219	FTE1_peak_1214	chr12_65959944_65960298	MIR1244-1;MIR1244-2;MIR1244-3	.	.
chr12	65997729	65997999	271	65997849	19.38	17.0303	9.09854	12.5833	FTE1_peak_1215	chr12_65997729_65997999	MIR1244-1;MIR1244-2;MIR1244-3	.	.
chr12	66006205	66006345	141	66006261	14.38	11.2192	6.86574	7.25339	FTE1_peak_1216	chr12_66006205_66006345	MIR1244-1;MIR1244-2;MIR1244-3	.	.
chr12	66025471	66025790	320	66025667	16.88	10.2513	5.95981	6.36151	FTE1_peak_1217	chr12_66025471_66025790	MIR1244-1;MIR1244-2;MIR1244-3	.	.
chr12	66047588	66047718	131	66047662	13.13	10.1341	6.30754	6.26448	FTE1_peak_1218	chr12_66047588_66047718	MIR1244-1;MIR1244-2;MIR1244-3	.	.
chr12	66048712	66049255	544	66048785	13.75	10.1341	6.58664	6.26448	FTE1_peak_1219	chr12_66048712_66049255	MIR1244-1;MIR1244-2;MIR1244-3	.	.
chr12	66049400	66049532	133	66049470	13.75	10.1341	6.58664	6.26448	FTE1_peak_1220	chr12_66049400_66049532	MIR1244-1;MIR1244-2;MIR1244-3	.	.
chr12	66049888	66050177	290	66049944	15	12.332	7.14484	8.24545	FTE1_peak_1221	chr12_66049888_66050177	MIR1244-1;MIR1244-2;MIR1244-3	.	.
chr12	66050605	66050955	351	66050835	26.26	26.0341	12.1686	21.0394	FTE1_peak_1222	chr12_66050605_66050955	MIR1244-1;MIR1244-2;MIR1244-3	.	.
chr12	66173003	66173146	144	66173089	12.5	9.07861	6.02844	5.34078	FTE1_peak_1223	chr12_66173003_66173146	MIR1244-1;MIR1244-2;MIR1244-3;RPSAP52	.	.
chr12	66273758	66274124	367	66273837	15	9.71651	5.56659	5.93174	FTE1_peak_1224	chr12_66273758_66274124	HMGA2;MIR1244-1;MIR1244-2;MIR1244-3	.	.
chr12	66285185	66285340	156	66285255	11.88	8.05487	5.74934	4.40147	FTE1_peak_1225	chr12_66285185_66285340	HMGA2;MIR1244-1;MIR1244-2;MIR1244-3	.	.
chr12	66285894	66286158	265	66285941	17.5	10.3899	5.69372	6.4973	FTE1_peak_1226	chr12_66285894_66286158	HMGA2;MIR1244-1;MIR1244-2;MIR1244-3	.	.
chr12	66286775	66286947	173	66286853	11.25	7.69892	5.24191	4.13894	FTE1_peak_1227	chr12_66286775_66286947	HMGA2;MIR1244-1;MIR1244-2;MIR1244-3	.	.
chr12	66393351	66393475	125	66393432	11.88	8.05487	5.74934	4.40147	FTE1_peak_1228	chr12_66393351_66393475	MIR1244-1;MIR1244-2;MIR1244-3	.	.
chr12	67040941	67041075	135	67041035	13.75	10.1341	6.58664	6.26448	FTE1_peak_1229	chr12_67040941_67041075	GRIP1;MIR1244-1;MIR1244-2;MIR1244-3	.	.
chr12	68099827	68100043	217	68099950	24.38	23.373	11.3313	18.5309	FTE1_peak_1230	chr12_68099827_68100043	MIR1244-1;MIR1244-2;MIR1244-3	.	.
chr12	68304218	68304467	250	68304387	18.13	11.3193	5.88608	7.35029	FTE1_peak_1231	chr12_68304218_68304467	MIR1244-1;MIR1244-2;MIR1244-3	.	.
chr12	68661704	68661876	173	68661806	17.5	14.5754	8.22426	10.3316	FTE1_peak_1232	chr12_68661704_68661876	MIR1244-1;MIR1244-2;MIR1244-3	IL22	MDM1
chr12	68704353	68704491	139	68704425	13.13	9.03572	5.62326	5.33408	FTE1_peak_1233	chr12_68704353_68704491	MDM1;MIR1244-1;MIR1244-2;MIR1244-3	.	.
chr12	68891554	68891823	270	68891711	29.38	30.0414	13.5034	24.8805	FTE1_peak_1234	chr12_68891554_68891823	MIR1244-1;MIR1244-2;MIR1244-3	.	.
chr12	69291589	69291794	206	69291671	20.63	12.8015	6.40901	8.69582	FTE1_peak_1235	chr12_69291589_69291794	CPM;MIR1244-1;MIR1244-2;MIR1244-3	.	.
chr12	69308855	69309061	207	69308909	21.26	15.2574	7.41853	10.9537	FTE1_peak_1236	chr12_69308855_69309061	CPM;MIR1244-1;MIR1244-2;MIR1244-3	.	.
chr12	69799300	69799497	198	69799404	20.01	14.2141	7.00175	9.98737	FTE1_peak_1237	chr12_69799300_69799497	MIR1244-1;MIR1244-2;MIR1244-3	YEATS4	.
chr12	70049877	70050001	125	70049898	13.13	10.1341	6.30754	6.26448	FTE1_peak_1238	chr12_70049877_70050001	BEST3;MIR1244-1;MIR1244-2;MIR1244-3	.	.
chr12	71040734	71040911	178	71040792	17.5	14.6345	8.26124	10.362	FTE1_peak_1239	chr12_71040734_71040911	MIR1244-1;MIR1244-2;MIR1244-3;PTPRR	PTPRB	.
chr12	71247223	71247349	127	71247323	13.75	10.1341	6.58664	6.26448	FTE1_peak_1240	chr12_71247223_71247349	MIR1244-1;MIR1244-2;MIR1244-3;PTPRR	.	.
chr12	71387944	71388200	257	71388092	16.88	13.4709	7.98214	9.27938	FTE1_peak_1241	chr12_71387944_71388200	MIR1244-1;MIR1244-2;MIR1244-3	.	.
chr12	71950913	71951070	158	71951001	16.25	11.1353	6.27428	7.2111	FTE1_peak_1242	chr12_71950913_71951070	LGR5;MIR1244-1;MIR1244-2;MIR1244-3	.	.
chr12	75118955	75119089	135	75119009	19.38	17.0303	9.09854	12.5833	FTE1_peak_1243	chr12_75118955_75119089	MIR1244-1;MIR1244-2;MIR1244-3	.	.
chr12	75571876	75572122	247	75571975	13.75	10.1341	6.58664	6.26448	FTE1_peak_1244	chr12_75571876_75572122	KCNC2;MIR1244-1;MIR1244-2;MIR1244-3	.	.
chr12	75840828	75840992	165	75840898	21.88	19.4374	10.1692	14.8527	FTE1_peak_1245	chr12_75840828_75840992	MIR1244-1;MIR1244-2;MIR1244-3	GLIPR1L2	.
chr12	76084453	76084593	141	76084568	13.75	10.1341	6.58664	6.26448	FTE1_peak_1246	chr12_76084453_76084593	MIR1244-1;MIR1244-2;MIR1244-3	.	.
chr12	76116544	76116676	133	76116599	14.38	11.2192	6.86574	7.25339	FTE1_peak_1247	chr12_76116544_76116676	MIR1244-1;MIR1244-2;MIR1244-3	.	.
chr12	76118803	76119134	332	76118878	21.26	19.4374	9.89137	14.8527	FTE1_peak_1248	chr12_76118803_76119134	MIR1244-1;MIR1244-2;MIR1244-3	.	.
chr12	76371784	76371999	216	76371881	19.38	17.0303	9.09854	12.5833	FTE1_peak_1249	chr12_76371784_76371999	MIR1244-1;MIR1244-2;MIR1244-3	.	.
chr12	76372146	76372344	199	76372256	15.63	12.332	7.42394	8.24545	FTE1_peak_1250	chr12_76372146_76372344	MIR1244-1;MIR1244-2;MIR1244-3	.	.
chr12	76414627	76414811	185	76414706	14.38	10.0841	6.15151	6.26448	FTE1_peak_1251	chr12_76414627_76414811	MIR1244-1;MIR1244-2;MIR1244-3	.	NAP1L1;PHLDA1
chr12	76419093	76419217	125	76419165	10	6.74198	4.70701	3.34288	FTE1_peak_1252	chr12_76419093_76419217	MIR1244-1;MIR1244-2;MIR1244-3	.	NAP1L1;PHLDA1
chr12	76671214	76671546	333	76671524	15.63	9.31879	5.54303	5.55219	FTE1_peak_1253	chr12_76671214_76671546	MIR1244-1;MIR1244-2;MIR1244-3	.	.
chr12	76843378	76843582	205	76843484	15	12.332	7.14484	8.24545	FTE1_peak_1254	chr12_76843378_76843582	MIR1244-1;MIR1244-2;MIR1244-3;OSBPL8	.	.
chr12	77113994	77114222	229	77114115	31.88	26.6287	10.9611	21.6138	FTE1_peak_1255	chr12_77113994_77114222	MIR1244-1;MIR1244-2;MIR1244-3	.	.
chr12	78334022	78334153	132	78334052	15.63	12.332	7.42394	8.24545	FTE1_peak_1256	chr12_78334022_78334153	MIR1244-1;MIR1244-2;MIR1244-3;NAV3	.	.
chr12	78684482	78684702	221	78684597	14.38	11.2192	6.86574	7.25339	FTE1_peak_1257	chr12_78684482_78684702	MIR1244-1;MIR1244-2;MIR1244-3	.	.
chr12	78797120	78797613	494	78797184	15.63	9.31879	5.54303	5.55219	FTE1_peak_1258	chr12_78797120_78797613	MIR1244-1;MIR1244-2;MIR1244-3	.	.
chr12	79098031	79098212	182	79098098	22.51	16.3197	7.8353	11.9212	FTE1_peak_1259	chr12_79098031_79098212	MIR1244-1;MIR1244-2;MIR1244-3	.	.
chr12	79813840	79814090	251	79813925	13.13	10.1341	6.30754	6.26448	FTE1_peak_1260	chr12_79813840_79814090	MIR1244-1;MIR1244-2;MIR1244-3;SYT1	MIR1252	.
chr12	79818023	79818165	143	79818094	15	12.332	7.14484	8.24545	FTE1_peak_1261	chr12_79818023_79818165	MIR1244-1;MIR1244-2;MIR1244-3;SYT1	MIR1252	.
chr12	79940730	79940896	167	79940895	11.25	5.86499	4.08432	2.57335	FTE1_peak_1262	chr12_79940730_79940896	MIR1244-1;MIR1244-2;MIR1244-3	.	.
chr12	79941111	79941339	229	79941216	36.88	40.2071	16.9133	34.6725	FTE1_peak_1263	chr12_79941111_79941339	MIR1244-1;MIR1244-2;MIR1244-3	.	.
chr12	80119857	80120022	166	80119960	19.38	13.1909	6.79336	9.0676	FTE1_peak_1264	chr12_80119857_80120022	MIR1244-1;MIR1244-2;MIR1244-3	.	.
chr12	80438592	80438740	149	80438677	12.5	9.07861	6.02844	5.34078	FTE1_peak_1265	chr12_80438592_80438740	MIR1244-1;MIR1244-2;MIR1244-3	.	.
chr12	80987695	80987869	175	80987799	18.13	9.25272	4.78244	5.50444	FTE1_peak_1266	chr12_80987695_80987869	MIR1244-1;MIR1244-2;MIR1244-3;PTPRQ	.	.
chr12	81021569	81021885	317	81021645	15.63	12.332	7.42394	8.24545	FTE1_peak_1267	chr12_81021569_81021885	MIR1244-1;MIR1244-2;MIR1244-3;PTPRQ	.	.
chr12	85410270	85410481	212	85410424	14.38	11.2192	6.86574	7.25339	FTE1_peak_1268	chr12_85410270_85410481	MIR1244-1;MIR1244-2;MIR1244-3;TSPAN19	.	LRRIQ1
chr12	85799702	85799893	192	85799809	26.26	20.7457	9.08563	16.0681	FTE1_peak_1269	chr12_85799702_85799893	MIR1244-1;MIR1244-2;MIR1244-3	.	.
chr12	87106213	87106470	258	87106326	33.13	35.7023	15.1705	30.3147	FTE1_peak_1270	chr12_87106213_87106470	MGAT4C;MIR1244-1;MIR1244-2;MIR1244-3	.	.
chr12	87833938	87834084	147	87833988	15.63	12.332	7.42394	8.24545	FTE1_peak_1271	chr12_87833938_87834084	MIR1244-1;MIR1244-2;MIR1244-3	.	.
chr12	88149830	88150117	288	88150042	18.13	15.8213	8.54034	11.4425	FTE1_peak_1272	chr12_88149830_88150117	MIR1244-1;MIR1244-2;MIR1244-3	.	MKRN9P
chr12	88203789	88203925	137	88203897	13.13	7.53305	4.70948	3.98652	FTE1_peak_1273	chr12_88203789_88203925	MIR1244-1;MIR1244-2;MIR1244-3	MKRN9P	.
chr12	88207590	88207835	246	88207683	21.26	18.5786	9.37077	14.0206	FTE1_peak_1274	chr12_88207590_88207835	MIR1244-1;MIR1244-2;MIR1244-3	MKRN9P	.
chr12	88693592	88693723	132	88693625	18.75	13.748	7.52568	9.54549	FTE1_peak_1275	chr12_88693592_88693723	MIR1244-1;MIR1244-2;MIR1244-3	.	.
chr12	88702740	88702934	195	88702816	18.75	15.8213	8.81944	11.4425	FTE1_peak_1276	chr12_88702740_88702934	MIR1244-1;MIR1244-2;MIR1244-3	.	.
chr12	88719310	88719647	338	88719514	18.75	15.8213	8.81944	11.4425	FTE1_peak_1277	chr12_88719310_88719647	MIR1244-1;MIR1244-2;MIR1244-3	.	.
chr12	88814310	88814444	135	88814381	20.01	14.2141	7.00175	9.98737	FTE1_peak_1278	chr12_88814310_88814444	MIR1244-1;MIR1244-2;MIR1244-3	.	.
chr12	88940640	88940947	308	88940842	24.38	11.8043	5.07628	7.81348	FTE1_peak_1279	chr12_88940640_88940947	KITLG;MIR1244-1;MIR1244-2;MIR1244-3	.	.
chr12	89556573	89556846	274	89556743	17.5	14.6345	8.26124	10.362	FTE1_peak_1280	chr12_89556573_89556846	MIR1244-1;MIR1244-2;MIR1244-3	.	.
chr12	89844816	89845038	223	89844925	22.51	14.2981	6.71597	10.0676	FTE1_peak_1281	chr12_89844816_89845038	MIR1244-1;MIR1244-2;MIR1244-3;POC1B	.	.
chr12	90125539	90125687	149	90125686	13.13	5.46828	3.53211	2.2132	FTE1_peak_1282	chr12_90125539_90125687	MIR1244-1;MIR1244-2;MIR1244-3	LOC338758	.
chr12	90127434	90127972	539	90127584	26.26	20.7457	9.08563	16.0681	FTE1_peak_1283	chr12_90127434_90127972	MIR1244-1;MIR1244-2;MIR1244-3	LOC338758	.
chr12	90150524	90150680	157	90150595	13.75	9.55984	6.21205	5.78139	FTE1_peak_1284	chr12_90150524_90150680	MIR1244-1;MIR1244-2;MIR1244-3	.	.
chr12	90163008	90163191	184	90163074	15.63	12.332	7.42394	8.24545	FTE1_peak_1285	chr12_90163008_90163191	MIR1244-1;MIR1244-2;MIR1244-3	.	.
chr12	90288235	90288388	154	90288329	11.88	8.05487	5.74934	4.40147	FTE1_peak_1286	chr12_90288235_90288388	MIR1244-1;MIR1244-2;MIR1244-3	.	.
chr12	90341838	90342024	187	90341914	14.38	11.2192	6.86574	7.25339	FTE1_peak_1287	chr12_90341838_90342024	MIR1244-1;MIR1244-2;MIR1244-3	.	.
chr12	90393701	90393921	221	90393809	20.63	14.2141	7.21014	9.98737	FTE1_peak_1288	chr12_90393701_90393921	MIR1244-1;MIR1244-2;MIR1244-3	.	.
chr12	90647651	90647809	159	90647723	18.75	15.8213	8.81944	11.4425	FTE1_peak_1289	chr12_90647651_90647809	MIR1244-1;MIR1244-2;MIR1244-3	.	.
chr12	91290005	91290282	278	91290161	19.38	17.0303	9.09854	12.5833	FTE1_peak_1290	chr12_91290005_91290282	MIR1244-1;MIR1244-2;MIR1244-3	.	C12orf37
chr12	91492828	91493001	174	91492899	17.5	14.6345	8.26124	10.362	FTE1_peak_1291	chr12_91492828_91493001	MIR1244-1;MIR1244-2;MIR1244-3	.	LUM
chr12	91527755	91527952	198	91527875	19.38	17.0303	9.09854	12.5833	FTE1_peak_1292	chr12_91527755_91527952	MIR1244-1;MIR1244-2;MIR1244-3	LUM	DCN
chr12	91534178	91534428	251	91534305	18.75	12.1886	6.58497	8.17106	FTE1_peak_1293	chr12_91534178_91534428	MIR1244-1;MIR1244-2;MIR1244-3	LUM	DCN
chr12	91576896	91577175	280	91577094	17.5	14.6345	8.26124	10.362	FTE1_peak_1294	chr12_91576896_91577175	MIR1244-1;MIR1244-2;MIR1244-3	DCN	.
chr12	92474325	92474611	287	92474522	16.25	13.4709	7.70304	9.27938	FTE1_peak_1295	chr12_92474325_92474611	LOC256021;MIR1244-1;MIR1244-2;MIR1244-3	.	.
chr12	93293137	93293465	329	93293395	16.88	11.3783	6.65281	7.40844	FTE1_peak_1296	chr12_93293137_93293465	EEA1;MIR1244-1;MIR1244-2;MIR1244-3	.	.
chr12	93483996	93484198	203	93484079	20.63	18.2604	9.65674	13.7189	FTE1_peak_1297	chr12_93483996_93484198	LOC643339;MIR1244-1;MIR1244-2;MIR1244-3	.	.
chr12	93920680	93920827	148	93920773	15.63	12.2158	7.34988	8.19737	FTE1_peak_1298	chr12_93920680_93920827	MIR1244-1;MIR1244-2;MIR1244-3	MRPL42	.
chr12	94018902	94019031	130	94018948	16.25	11.1353	6.27428	7.2111	FTE1_peak_1299	chr12_94018902_94019031	MIR1244-1;MIR1244-2;MIR1244-3	.	.
chr12	94170616	94170903	288	94170697	15.63	12.332	7.42394	8.24545	FTE1_peak_1300	chr12_94170616_94170903	CRADD;MIR1244-1;MIR1244-2;MIR1244-3	.	.
chr12	94171456	94171598	143	94171481	12.5	7.70582	5.14411	4.14422	FTE1_peak_1301	chr12_94171456_94171598	CRADD;MIR1244-1;MIR1244-2;MIR1244-3	.	.
chr12	94179101	94179293	193	94179179	18.13	12.6698	6.65383	8.57409	FTE1_peak_1302	chr12_94179101_94179293	CRADD;MIR1244-1;MIR1244-2;MIR1244-3	.	.
chr12	94184677	94184831	155	94184735	20.63	18.2604	9.65674	13.7189	FTE1_peak_1303	chr12_94184677_94184831	CRADD;MIR1244-1;MIR1244-2;MIR1244-3	.	.
chr12	94203922	94204075	154	94204002	11.25	8.01672	5.44576	4.40147	FTE1_peak_1304	chr12_94203922_94204075	CRADD;MIR1244-1;MIR1244-2;MIR1244-3	.	.
chr12	94277630	94277785	156	94277682	16.88	10.2513	5.95981	6.36151	FTE1_peak_1305	chr12_94277630_94277785	MIR1244-1;MIR1244-2;MIR1244-3	.	.
chr12	94486754	94486878	125	94486777	13.13	10.1341	6.30754	6.26448	FTE1_peak_1306	chr12_94486754_94486878	MIR1244-1;MIR1244-2;MIR1244-3	.	.
chr12	94566807	94567177	371	94566927	21.88	15.2574	7.62691	10.9537	FTE1_peak_1307	chr12_94566807_94567177	MIR1244-1;MIR1244-2;MIR1244-3;PLXNC1	.	.
chr12	95173374	95173560	187	95173449	13.75	10.1341	6.58664	6.26448	FTE1_peak_1308	chr12_95173374_95173560	MIR1244-1;MIR1244-2;MIR1244-3	.	.
chr12	95378018	95378265	248	95378128	22.51	10.2238	4.70118	6.34983	FTE1_peak_1309	chr12_95378018_95378265	MIR1244-1;MIR1244-2;MIR1244-3;NDUFA12	.	.
chr12	95711949	95712134	186	95711950	11.25	5.86499	4.08432	2.57335	FTE1_peak_1310	chr12_95711949_95712134	MIR1244-1;MIR1244-2;MIR1244-3	MIR331;MIR3685;VEZT	.
chr12	96031313	96031696	384	96031469	27.51	27.3886	12.7268	22.3388	FTE1_peak_1311	chr12_96031313_96031696	MIR1244-1;MIR1244-2;MIR1244-3	.	NTN4
chr12	96127020	96127242	223	96127136	16.25	13.4153	7.66856	9.27938	FTE1_peak_1312	chr12_96127020_96127242	MIR1244-1;MIR1244-2;MIR1244-3;NTN4	.	.
chr12	96199911	96200132	222	96200020	15	12.332	7.14484	8.24545	FTE1_peak_1313	chr12_96199911_96200132	MIR1244-1;MIR1244-2;MIR1244-3	NTN4	.
chr12	98833951	98834188	238	98834114	16.25	12.9516	7.3815	8.84166	FTE1_peak_1314	chr12_98833951_98834188	MIR1244-1;MIR1244-2;MIR1244-3	.	SLC9A7P1
chr12	98869103	98869334	232	98869217	16.88	12.2852	7.22401	8.24545	FTE1_peak_1315	chr12_98869103_98869334	MIR1244-1;MIR1244-2;MIR1244-3	SLC9A7P1	LOC643770
chr12	99012869	99013029	161	99012947	15.63	11.1147	6.65164	7.19278	FTE1_peak_1316	chr12_99012869_99013029	IKBIP;MIR1244-1;MIR1244-2;MIR1244-3	SLC25A3;SNORA53	APAF1
chr12	100522013	100522143	131	100522059	19.38	13.1909	6.79336	9.0676	FTE1_peak_1317	chr12_100522013_100522143	MIR1244-1;MIR1244-2;MIR1244-3;UHRF1BP1L	.	GOLGA2P5
chr12	101445973	101446176	204	101446087	18.13	12.1886	6.37659	8.17106	FTE1_peak_1318	chr12_101445973_101446176	ANO4;MIR1244-1;MIR1244-2;MIR1244-3	.	.
chr12	102933712	102933899	188	102933801	21.26	15.2574	7.41853	10.9537	FTE1_peak_1319	chr12_102933712_102933899	MIR1244-1;MIR1244-2;MIR1244-3	.	.
chr12	102961043	102961294	252	102961149	28.13	28.7582	13.0059	23.6384	FTE1_peak_1320	chr12_102961043_102961294	MIR1244-1;MIR1244-2;MIR1244-3	.	.
chr12	103954404	103954629	226	103954436	16.25	12.7627	7.26495	8.65829	FTE1_peak_1321	chr12_103954404_103954629	MIR1244-1;MIR1244-2;MIR1244-3	.	STAB2
chr12	104302800	104302970	171	104302849	11.88	7.56973	5.42237	4.01737	FTE1_peak_1322	chr12_104302800_104302970	GNN;MIR1244-1;MIR1244-2;MIR1244-3	.	HSP90B1;MIR3652
chr12	104571874	104572004	131	104571935	13.13	9.55984	5.94882	5.78139	FTE1_peak_1323	chr12_104571874_104572004	MIR1244-1;MIR1244-2;MIR1244-3	.	.
chr12	104613479	104613605	127	104613539	20.63	10.8631	5.37402	6.9544	FTE1_peak_1324	chr12_104613479_104613605	MIR1244-1;MIR1244-2;MIR1244-3;TXNRD1	.	.
chr12	104997303	104997692	390	104997457	27.51	27.3886	12.7268	22.3388	FTE1_peak_1325	chr12_104997303_104997692	CHST11;MIR1244-1;MIR1244-2;MIR1244-3	MIR3922	.
chr12	105065487	105065777	291	105065592	25.63	8.87152	3.80453	5.17654	FTE1_peak_1326	chr12_105065487_105065777	CHST11;MIR1244-1;MIR1244-2;MIR1244-3	.	.
chr12	105332390	105332567	178	105332473	11.25	6.79844	4.66779	3.39491	FTE1_peak_1327	chr12_105332390_105332567	MIR1244-1;MIR1244-2;MIR1244-3	SLC41A2	.
chr12	105369557	105369704	148	105369613	20.01	14.2141	7.00175	9.98737	FTE1_peak_1328	chr12_105369557_105369704	MIR1244-1;MIR1244-2;MIR1244-3	.	C12orf45
chr12	105648001	105648328	328	105648216	20.63	18.2604	9.65674	13.7189	FTE1_peak_1329	chr12_105648001_105648328	MIR1244-1;MIR1244-2;MIR1244-3	APPL2	.
chr12	105650853	105651043	191	105650908	11.25	7.56973	5.15914	4.01737	FTE1_peak_1330	chr12_105650853_105651043	MIR1244-1;MIR1244-2;MIR1244-3	APPL2	.
chr12	105651219	105651545	327	105651379	20.63	18.2604	9.65674	13.7189	FTE1_peak_1331	chr12_105651219_105651545	MIR1244-1;MIR1244-2;MIR1244-3	APPL2	.
chr12	105879094	105879348	255	105879277	27.51	17.3804	7.1268	12.922	FTE1_peak_1332	chr12_105879094_105879348	MIR1244-1;MIR1244-2;MIR1244-3	.	.
chr12	106328147	106328284	138	106328241	13.13	10.1341	6.30754	6.26448	FTE1_peak_1333	chr12_106328147_106328284	MIR1244-1;MIR1244-2;MIR1244-3	.	.
chr12	106371538	106371730	193	106371582	18.13	15.8213	8.54034	11.4425	FTE1_peak_1334	chr12_106371538_106371730	MIR1244-1;MIR1244-2;MIR1244-3	.	.
chr12	106381164	106381491	328	106381288	17.5	8.44714	4.62615	4.77024	FTE1_peak_1335	chr12_106381164_106381491	MIR1244-1;MIR1244-2;MIR1244-3	.	.
chr12	106424312	106424544	233	106424427	23.76	22.0676	11.0522	17.2871	FTE1_peak_1336	chr12_106424312_106424544	MIR1244-1;MIR1244-2;MIR1244-3	.	.
chr12	107255896	107256032	137	107255983	15	12.2799	7.11286	8.24545	FTE1_peak_1337	chr12_107255896_107256032	MIR1244-1;MIR1244-2;MIR1244-3;RIC8B	.	.
chr12	109116676	109117161	486	109117059	20.01	18.2604	9.37764	13.7189	FTE1_peak_1338	chr12_109116676_109117161	CORO1C;MIR1244-1;MIR1244-2;MIR1244-3	.	.
chr12	109220467	109221015	549	109220732	22.51	18.2382	8.95463	13.7189	FTE1_peak_1339	chr12_109220467_109221015	MIR1244-1;MIR1244-2;MIR1244-3;SSH1	.	.
chr12	109226474	109226598	125	109226508	12.5	8.78655	5.83926	5.09402	FTE1_peak_1340	chr12_109226474_109226598	MIR1244-1;MIR1244-2;MIR1244-3;SSH1	.	.
chr12	109232217	109232498	282	109232429	15.63	11.5534	6.92879	7.57923	FTE1_peak_1341	chr12_109232217_109232498	MIR1244-1;MIR1244-2;MIR1244-3;SSH1	.	.
chr12	109900319	109900466	148	109900402	13.75	10.1341	6.58664	6.26448	FTE1_peak_1342	chr12_109900319_109900466	KCTD10;MIR1244-1;MIR1244-2;MIR1244-3	MYO1H	UBE3B
chr12	109901041	109901189	149	109901085	15.63	9.71651	5.78404	5.93174	FTE1_peak_1343	chr12_109901041_109901189	KCTD10;MIR1244-1;MIR1244-2;MIR1244-3	MYO1H	UBE3B
chr12	110389003	110389196	194	110389115	18.13	12.1886	6.37659	8.17106	FTE1_peak_1344	chr12_110389003_110389196	GIT2;MIR1244-1;MIR1244-2;MIR1244-3	.	.
chr12	110389646	110389855	210	110389761	18.75	9.25272	4.93873	5.50444	FTE1_peak_1345	chr12_110389646_110389855	GIT2;MIR1244-1;MIR1244-2;MIR1244-3	.	.
chr12	110476822	110477188	367	110477100	13.75	5.46828	3.6884	2.2132	FTE1_peak_1346	chr12_110476822_110477188	ANKRD13A;MIR1244-1;MIR1244-2;MIR1244-3	.	C12orf76
chr12	110649777	110650098	322	110649871	18.75	14.9541	8.27431	10.6727	FTE1_peak_1347	chr12_110649777_110650098	IFT81;MIR1244-1;MIR1244-2;MIR1244-3	.	.
chr12	110707463	110707645	183	110707553	11.88	7.78731	5.56892	4.22202	FTE1_peak_1348	chr12_110707463_110707645	MIR1244-1;MIR1244-2;MIR1244-3	.	ATP2A2
chr12	110984313	110984480	168	110984401	17.5	13.0167	7.2567	8.90557	FTE1_peak_1349	chr12_110984313_110984480	MIR1244-1;MIR1244-2;MIR1244-3;PPTC7	RAD9B	.
chr12	112016334	112016522	189	112016440	19.38	15.1549	7.9532	10.867	FTE1_peak_1350	chr12_112016334_112016522	ATXN2;MIR1244-1;MIR1244-2;MIR1244-3	.	.
chr12	113652661	113652999	339	113652818	18.75	11.7396	6.32158	7.75347	FTE1_peak_1351	chr12_113652661_113652999	IQCD;MIR1244-1;MIR1244-2;MIR1244-3	C12orf52;DDX54	TPCN1
chr12	115371283	115371608	326	115371505	21.88	19.5105	10.2149	14.8878	FTE1_peak_1352	chr12_115371283_115371608	MIR1244-1;MIR1244-2;MIR1244-3	.	.
chr12	115843057	115843269	213	115843170	27.51	21.8929	9.50241	17.1565	FTE1_peak_1353	chr12_115843057_115843269	MIR1244-1;MIR1244-2;MIR1244-3	.	.
chr12	116475852	116476053	202	116475953	13.13	7.53305	4.70948	3.98652	FTE1_peak_1354	chr12_116475852_116476053	MED13L;MIR1244-1;MIR1244-2;MIR1244-3	.	.
chr12	116581296	116581420	125	116581316	13.13	10.089	6.27931	6.26448	FTE1_peak_1355	chr12_116581296_116581420	MED13L;MIR1244-1;MIR1244-2;MIR1244-3	.	MIR620
chr12	116590179	116590376	198	116590267	32.51	34.2673	14.8927	28.9291	FTE1_peak_1356	chr12_116590179_116590376	MED13L;MIR1244-1;MIR1244-2;MIR1244-3	MIR620	.
chr12	116819756	116819981	226	116819870	30.63	25.9892	10.8611	21.0267	FTE1_peak_1357	chr12_116819756_116819981	MIR1244-1;MIR1244-2;MIR1244-3	.	.
chr12	116827993	116828131	139	116828098	14.38	9.65848	5.88661	5.87708	FTE1_peak_1358	chr12_116827993_116828131	MIR1244-1;MIR1244-2;MIR1244-3	.	.
chr12	116844462	116844684	223	116844546	24.38	23.373	11.3313	18.5309	FTE1_peak_1359	chr12_116844462_116844684	MIR1244-1;MIR1244-2;MIR1244-3	.	MIR4472-2
chr12	116872036	116872197	162	116872127	25.63	17.3029	7.60907	12.8501	FTE1_peak_1360	chr12_116872036_116872197	MIR1244-1;MIR1244-2;MIR1244-3	MIR4472-2	.
chr12	117566166	117566304	139	117566268	12.5	9.07861	6.02844	5.34078	FTE1_peak_1361	chr12_117566166_117566304	MIR1244-1;MIR1244-2;MIR1244-3	TESC	FBXO21
chr12	118490316	118490537	222	118490430	26.88	23.9101	11.1528	19.0474	FTE1_peak_1362	chr12_118490316_118490537	MIR1244-1;MIR1244-2;MIR1244-3;WSB2	RFC5	VSIG10
chr12	118874790	118875014	225	118874908	16.25	13.4709	7.70304	9.27938	FTE1_peak_1363	chr12_118874790_118875014	MIR1244-1;MIR1244-2;MIR1244-3	SUDS3	.
chr12	120669152	120669329	178	120669259	17.5	8.44714	4.62615	4.77024	FTE1_peak_1364	chr12_120669152_120669329	MIR1244-1;MIR1244-2;MIR1244-3;PXN	LOC100506649	.
chr12	120728917	120729789	873	120729417	71.27	55.6018	12.0448	49.634	FTE1_peak_1365	chr12_120728917_120729789	MIR1244-1;MIR1244-2;MIR1244-3	PXN	SIRT4
chr12	120730483	120731092	610	120730908	36.26	22.5515	7.4519	17.7571	FTE1_peak_1366	chr12_120730483_120731092	MIR1244-1;MIR1244-2;MIR1244-3	PXN	PLA2G1B;SIRT4
chr12	121628434	121628584	151	121628548	13.13	9.08114	5.65138	5.34078	FTE1_peak_1367	chr12_121628434_121628584	MIR1244-1;MIR1244-2;MIR1244-3	P2RX7	P2RX4
chr12	122510635	122510759	125	122510700	15	9.35728	5.35697	5.59024	FTE1_peak_1368	chr12_122510635_122510759	MIR1244-1;MIR1244-2;MIR1244-3	BCL7A	MLXIP
chr12	122884496	122884633	138	122884603	14.38	8.41215	5.12626	4.73758	FTE1_peak_1369	chr12_122884496_122884633	CLIP1;MIR1244-1;MIR1244-2;MIR1244-3	LOC100507066	.
chr12	122934031	122934155	125	122934090	18.13	13.8656	7.3576	9.66006	FTE1_peak_1370	chr12_122934031_122934155	MIR1244-1;MIR1244-2;MIR1244-3	CLIP1	ZCCHC8
chr12	123163647	123163890	244	123163767	21.88	11.7967	5.72019	7.8066	FTE1_peak_1371	chr12_123163647_123163890	MIR1244-1;MIR1244-2;MIR1244-3	.	HCAR2
chr12	125150155	125150306	152	125150230	16.88	11.8955	6.97734	7.90252	FTE1_peak_1372	chr12_125150155_125150306	MIR1244-1;MIR1244-2;MIR1244-3	.	.
chr12	125232100	125232281	182	125232170	18.75	11.1983	6.0091	7.25339	FTE1_peak_1373	chr12_125232100_125232281	MIR1244-1;MIR1244-2;MIR1244-3	.	SCARB1
chr12	125394274	125394497	224	125394394	16.25	9.34168	5.22857	5.57476	FTE1_peak_1374	chr12_125394274_125394497	MIR1244-1;MIR1244-2;MIR1244-3	.	UBC
chr12	125394683	125395837	1155	125395160	26.26	16.6742	6.94443	12.2629	FTE1_peak_1375	chr12_125394683_125395837	MIR1244-1;MIR1244-2;MIR1244-3	.	UBC
chr12	127725681	127725968	288	127725875	13.13	9.81751	6.1096	6.02978	FTE1_peak_1376	chr12_127725681_127725968	MIR1244-1;MIR1244-2;MIR1244-3	.	.
chr12	127754987	127755111	125	127755012	14.38	11.2192	6.86574	7.25339	FTE1_peak_1377	chr12_127754987_127755111	MIR1244-1;MIR1244-2;MIR1244-3	.	.
chr12	127757621	127757848	228	127757763	16.25	12.1714	6.90171	8.16651	FTE1_peak_1378	chr12_127757621_127757848	MIR1244-1;MIR1244-2;MIR1244-3	.	.
chr13	20925577	20925792	216	20925637	16.25	12.701	7.22692	8.60182	FTE1_peak_1379	chr13_20925577_20925792	.	.	.
chr13	20994097	20994421	325	20994326	30.63	24.4402	10.0025	19.5618	FTE1_peak_1380	chr13_20994097_20994421	CRYL1	.	MIR4499
chr13	21568067	21568296	230	21568088	15.63	6.78827	4.09332	3.38759	FTE1_peak_1381	chr13_21568067_21568296	LATS2	.	.
chr13	21571946	21572082	137	21571978	15	7.94133	4.55628	4.37038	FTE1_peak_1382	chr13_21571946_21572082	LATS2	.	.
chr13	21643815	21643962	148	21643919	17.5	11.2084	6.1682	7.25339	FTE1_peak_1383	chr13_21643815_21643962	.	LATS2	.
chr13	23895703	23895850	148	23895710	11.88	5.59851	4.121	2.33872	FTE1_peak_1384	chr13_23895703_23895850	SGCG	.	SACS
chr13	24001540	24001759	220	24001660	18.13	15.8213	8.54034	11.4425	FTE1_peak_1385	chr13_24001540_24001759	SACS	.	.
chr13	24075146	24075303	158	24075246	21.26	19.4374	9.89137	14.8527	FTE1_peak_1386	chr13_24075146_24075303	.	LINC00327	.
chr13	24275792	24275922	131	24275855	22.51	10.2238	4.70118	6.34983	FTE1_peak_1387	chr13_24275792_24275922	.	TNFRSF19	MIPEP
chr13	24364875	24365172	298	24365060	17.5	11.2084	6.1682	7.25339	FTE1_peak_1388	chr13_24364875_24365172	MIPEP	.	.
chr13	27159085	27159240	156	27159156	18.75	7.28745	3.95098	3.76508	FTE1_peak_1389	chr13_27159085_27159240	WASF3	.	.
chr13	30096307	30096445	139	30096397	17.5	10.7448	5.89788	6.83903	FTE1_peak_1390	chr13_30096307_30096445	SLC7A1	MTUS2	.
chr13	30194313	30194458	146	30194370	21.26	15.0954	7.32694	10.8085	FTE1_peak_1391	chr13_30194313_30194458	.	SLC7A1	.
chr13	30912720	30912845	126	30912765	11.88	8.05487	5.74934	4.40147	FTE1_peak_1392	chr13_30912720_30912845	.	.	LINC00426
chr13	31287397	31287580	184	31287512	11.25	8.05487	5.47024	4.40147	FTE1_peak_1393	chr13_31287397_31287580	.	.	ALOX5AP
chr13	31317578	31317711	134	31317620	15.63	11.6685	7.00173	7.68431	FTE1_peak_1394	chr13_31317578_31317711	ALOX5AP	.	.
chr13	31317822	31317983	162	31317873	16.25	12.5194	7.11516	8.42876	FTE1_peak_1395	chr13_31317822_31317983	ALOX5AP	.	.
chr13	32324206	32324371	166	32324292	16.88	12.7627	7.52818	8.65829	FTE1_peak_1396	chr13_32324206_32324371	RXFP2	.	.
chr13	32330110	32330257	148	32330162	15	12.332	7.14484	8.24545	FTE1_peak_1397	chr13_32330110_32330257	RXFP2	.	.
chr13	32330602	32330811	210	32330720	28.76	23.0554	9.91918	18.2388	FTE1_peak_1398	chr13_32330602_32330811	RXFP2	.	.
chr13	32339698	32339837	140	32339741	13.75	7.53305	4.91787	3.98652	FTE1_peak_1399	chr13_32339698_32339837	RXFP2	.	.
chr13	32341345	32341667	323	32341410	22.51	20.7799	10.494	16.0826	FTE1_peak_1400	chr13_32341345_32341667	RXFP2	.	.
chr13	32717082	32717279	198	32717175	16.88	13.4709	7.98214	9.27938	FTE1_peak_1401	chr13_32717082_32717279	FRY	.	.
chr13	32799705	32799888	184	32799799	10.63	7.06535	5.19114	3.5552	FTE1_peak_1402	chr13_32799705_32799888	FRY	.	.
chr13	33468957	33469092	136	33469055	15	12.332	7.14484	8.24545	FTE1_peak_1403	chr13_33468957_33469092	.	.	.
chr13	33768908	33769127	220	33769025	16.88	10.2513	5.95981	6.36151	FTE1_peak_1404	chr13_33768908_33769127	STARD13	.	.
chr13	33810225	33810495	271	33810335	35.63	25.6604	9.15859	20.7076	FTE1_peak_1405	chr13_33810225_33810495	STARD13	.	.
chr13	33854047	33854224	178	33854120	25.63	19.6141	8.87724	14.9783	FTE1_peak_1406	chr13_33854047_33854224	STARD13	.	.
chr13	33858717	33858925	209	33858822	15	12.332	7.14484	8.24545	FTE1_peak_1407	chr13_33858717_33858925	STARD13	.	.
chr13	38191354	38191664	311	38191561	26.88	26.0341	12.4477	21.0394	FTE1_peak_1408	chr13_38191354_38191664	.	POSTN	TRPC4
chr13	38276208	38276483	276	38276376	24.38	11.8043	5.07628	7.81348	FTE1_peak_1409	chr13_38276208_38276483	TRPC4	.	.
chr13	38289816	38289981	166	38289873	11.88	7.16595	5.15125	3.64882	FTE1_peak_1410	chr13_38289816_38289981	TRPC4	.	.
chr13	38321648	38321785	138	38321687	13.75	10.1341	6.58664	6.26448	FTE1_peak_1411	chr13_38321648_38321785	TRPC4	.	.
chr13	39984653	39984825	173	39984801	11.25	8.05487	5.47024	4.40147	FTE1_peak_1412	chr13_39984653_39984825	LHFP	.	.
chr13	40351728	40351872	145	40351806	16.88	10.2513	5.95981	6.36151	FTE1_peak_1413	chr13_40351728_40351872	COG6	.	.
chr13	40450676	40450809	134	40450734	13.13	10.1341	6.30754	6.26448	FTE1_peak_1414	chr13_40450676_40450809	.	.	.
chr13	40795540	40795785	246	40795635	18.13	15.8213	8.54034	11.4425	FTE1_peak_1415	chr13_40795540_40795785	.	LINC00548	.
chr13	41582643	41582785	143	41582697	15	9.31879	5.33465	5.55219	FTE1_peak_1416	chr13_41582643_41582785	ELF1;TTL	.	.
chr13	41706911	41707107	197	41706996	55.64	39.5775	10.0693	34.0629	FTE1_peak_1417	chr13_41706911_41707107	KBTBD6;TTL	.	.
chr13	41768658	41768816	159	41768740	42.51	11.4509	3.34701	7.4794	FTE1_peak_1418	chr13_41768658_41768816	KBTBD7;TTL	.	MTRF1
chr13	41859066	41859337	272	41859140	15.63	11.6685	7.00173	7.68431	FTE1_peak_1419	chr13_41859066_41859337	TTL	MTRF1	NAA16
chr13	42402000	42402176	177	42402082	17.5	14.6345	8.26124	10.362	FTE1_peak_1420	chr13_42402000_42402176	KIAA0564;TTL	.	.
chr13	43060887	43061037	151	43060961	10.63	7.06535	5.19114	3.5552	FTE1_peak_1421	chr13_43060887_43061037	TTL	.	.
chr13	43061148	43061307	160	43061248	18.75	15.8213	8.81944	11.4425	FTE1_peak_1422	chr13_43061148_43061307	TTL	.	.
chr13	43294641	43294834	194	43294741	18.75	15.0237	8.31786	10.7383	FTE1_peak_1423	chr13_43294641_43294834	TTL	.	.
chr13	43321646	43321882	237	43321806	16.88	13.4709	7.98214	9.27938	FTE1_peak_1424	chr13_43321646_43321882	TTL	.	.
chr13	43407095	43407219	125	43407152	14.38	11.2192	6.86574	7.25339	FTE1_peak_1425	chr13_43407095_43407219	TTL	.	.
chr13	43466956	43467168	213	43467145	12.5	8.54894	5.68559	4.86724	FTE1_peak_1426	chr13_43466956_43467168	EPSTI1;TTL	.	.
chr13	43570692	43570969	278	43570794	26.26	22.3653	10.0025	17.5754	FTE1_peak_1427	chr13_43570692_43570969	TTL	EPSTI1	DNAJC15
chr13	43579776	43579909	134	43579884	15.63	9.31879	5.54303	5.55219	FTE1_peak_1428	chr13_43579776_43579909	TTL	EPSTI1	DNAJC15
chr13	44422479	44422627	149	44422545	18.75	15.8213	8.81944	11.4425	FTE1_peak_1429	chr13_44422479_44422627	CCDC122;TTL	.	.
chr13	44806107	44806478	372	44806142	12.5	9.07861	6.02844	5.34078	FTE1_peak_1430	chr13_44806107_44806478	TTL	.	.
chr13	44875489	44875714	226	44875621	15.63	12.332	7.42394	8.24545	FTE1_peak_1431	chr13_44875489_44875714	TTL	.	.
chr13	44887089	44887436	348	44887218	23.76	22.0676	11.0522	17.2871	FTE1_peak_1432	chr13_44887089_44887436	TTL	.	.
chr13	45284865	45285087	223	45284925	12.5	8.0244	5.34783	4.40147	FTE1_peak_1433	chr13_45284865_45285087	TTL	.	.
chr13	45288316	45288473	158	45288370	17.5	11.2084	6.1682	7.25339	FTE1_peak_1434	chr13_45288316_45288473	TTL	.	.
chr13	45294194	45294449	256	45294365	11.88	7.40346	5.31056	3.87745	FTE1_peak_1435	chr13_45294194_45294449	TTL	.	.
chr13	45389941	45390096	156	45390020	16.25	13.4709	7.70304	9.27938	FTE1_peak_1436	chr13_45389941_45390096	TTL	LINC00330	.
chr13	45496099	45496286	188	45496176	23.13	19.7138	9.37129	15.0762	FTE1_peak_1437	chr13_45496099_45496286	TTL	.	NUFIP1
chr13	45763656	45763787	132	45763718	13.13	10.1341	6.30754	6.26448	FTE1_peak_1438	chr13_45763656_45763787	GTF2F2;TTL	.	KCTD4
chr13	45780473	45780727	255	45780624	21.26	18.5786	9.37077	14.0206	FTE1_peak_1439	chr13_45780473_45780727	GTF2F2;TTL	KCTD4	.
chr13	45908724	45908848	125	45908736	11.25	7.74289	5.27009	4.17964	FTE1_peak_1440	chr13_45908724_45908848	TTL	.	SNORA31;TPT1;TPT1-AS1
chr13	45909709	45909935	227	45909833	13.13	8.9461	5.56786	5.24902	FTE1_peak_1441	chr13_45909709_45909935	TTL	.	SNORA31;TPT1;TPT1-AS1
chr13	46075015	46075194	180	46075088	16.88	12.7627	7.52818	8.65829	FTE1_peak_1442	chr13_46075015_46075194	COG3;TTL	.	.
chr13	47063910	47064066	157	47063949	13.13	9.08114	5.65138	5.34078	FTE1_peak_1443	chr13_47063910_47064066	TTL	.	.
chr13	47317457	47317596	140	47317524	20.01	16.6313	8.4021	12.2207	FTE1_peak_1444	chr13_47317457_47317596	LRCH1;TTL	.	ESD
chr13	48058825	48058950	126	48058847	15	12.332	7.14484	8.24545	FTE1_peak_1445	chr13_48058825_48058950	TTL	.	.
chr13	48282719	48282863	145	48282820	13.13	10.1341	6.30754	6.26448	FTE1_peak_1446	chr13_48282719_48282863	TTL	.	.
chr13	49948834	49948958	125	49948861	11.88	8.01672	5.72361	4.40147	FTE1_peak_1447	chr13_49948834_49948958	CAB39L;TTL	.	.
chr13	50432437	50433020	584	50432863	41.89	43.811	16.818	38.1769	FTE1_peak_1448	chr13_50432437_50433020	TTL	.	.
chr13	50897988	50898136	149	50898057	12.5	8.59549	5.71567	4.91286	FTE1_peak_1449	chr13_50897988_50898136	TTL	.	.
chr13	51252660	51252845	186	51252737	20.01	7.09102	3.50088	3.57983	FTE1_peak_1450	chr13_51252660_51252845	TTL	.	.
chr13	52217289	52217610	322	52217381	21.88	18.5786	9.634	14.0206	FTE1_peak_1451	chr13_52217289_52217610	TTL;WDFY2	.	.
chr13	52288825	52288957	133	52288870	14.38	11.2192	6.86574	7.25339	FTE1_peak_1452	chr13_52288825_52288957	TTL;WDFY2	.	.
chr13	52922367	52922499	133	52922419	18.75	13.0283	7.08697	8.91677	FTE1_peak_1453	chr13_52922367_52922499	TTL	.	THSD1
chr13	53712126	53712271	146	53712165	13.13	10.1341	6.30754	6.26448	FTE1_peak_1454	chr13_53712126_53712271	TTL	.	.
chr13	66886998	66887128	131	66887100	11.88	8.05487	5.74934	4.40147	FTE1_peak_1455	chr13_66886998_66887128	PCDH9;TTL	.	.
chr13	67247607	67247803	197	67247698	14.38	11.2192	6.86574	7.25339	FTE1_peak_1456	chr13_67247607_67247803	PCDH9;TTL	.	.
chr13	67693858	67694027	170	67693931	13.75	10.1341	6.58664	6.26448	FTE1_peak_1457	chr13_67693858_67694027	PCDH9;TTL	.	.
chr13	67944115	67944312	198	67944232	25.01	24.6954	11.6104	19.7748	FTE1_peak_1458	chr13_67944115_67944312	TTL	.	.
chr13	74780509	74780759	251	74780603	21.26	19.5105	9.93584	14.8878	FTE1_peak_1459	chr13_74780509_74780759	TTL	.	.
chr13	74792027	74792153	127	74792092	13.75	10.1341	6.58664	6.26448	FTE1_peak_1460	chr13_74792027_74792153	TTL	.	.
chr13	74817703	74817977	275	74817855	30.01	25.4237	10.336	20.4783	FTE1_peak_1461	chr13_74817703_74817977	TTL	.	.
chr13	75341357	75341488	132	75341396	14.38	11.2192	6.86574	7.25339	FTE1_peak_1462	chr13_75341357_75341488	TTL	.	.
chr13	75348472	75348630	159	75348541	12.5	9.07861	6.02844	5.34078	FTE1_peak_1463	chr13_75348472_75348630	TTL	.	.
chr13	75399868	75400095	228	75399985	20.01	18.2604	9.37764	13.7189	FTE1_peak_1464	chr13_75399868_75400095	TTL	.	.
chr13	75709712	75709965	254	75709899	14.38	11.2192	6.86574	7.25339	FTE1_peak_1465	chr13_75709712_75709965	TTL	.	.
chr13	75756216	75756360	145	75756284	17.5	14.6345	8.26124	10.362	FTE1_peak_1466	chr13_75756216_75756360	TTL	.	.
chr13	75901194	75901338	145	75901288	18.75	15.5303	8.63603	11.2148	FTE1_peak_1467	chr13_75901194_75901338	TBC1D4;TTL	.	.
chr13	75933457	75933692	236	75933553	28.13	26.5693	11.7115	21.563	FTE1_peak_1468	chr13_75933457_75933692	TBC1D4;TTL	.	.
chr13	76195236	76195700	465	76195433	31.88	32.9534	14.6805	27.6446	FTE1_peak_1469	chr13_76195236_76195700	LMO7;TTL	UCHL3	.
chr13	77086950	77087098	149	77086993	17.5	11.2084	6.1682	7.25339	FTE1_peak_1470	chr13_77086950_77087098	TTL	.	.
chr13	77090290	77090470	181	77090384	11.88	8.05487	5.74934	4.40147	FTE1_peak_1471	chr13_77090290_77090470	TTL	.	.
chr13	80324458	80324601	144	80324551	15	12.332	7.14484	8.24545	FTE1_peak_1472	chr13_80324458_80324601	TTL	.	.
chr13	80510802	80511154	353	80510956	18.13	15.0237	8.05464	10.7383	FTE1_peak_1473	chr13_80510802_80511154	TTL	.	.
chr13	80614747	80615010	264	80614860	17.5	14.6345	8.26124	10.362	FTE1_peak_1474	chr13_80614747_80615010	TTL	.	.
chr13	81043903	81044198	296	81043973	16.25	11.6314	6.57305	7.65296	FTE1_peak_1475	chr13_81043903_81044198	TTL	.	.
chr13	91338940	91339069	130	91339049	13.13	10.089	6.27931	6.26448	FTE1_peak_1476	chr13_91338940_91339069	TTL	.	.
chr13	94848124	94848276	153	94848171	11.25	8.01672	5.44576	4.40147	FTE1_peak_1477	chr13_94848124_94848276	GPC6;TTL	.	.
chr13	94891378	94891733	356	94891571	23.13	17.4005	8.04369	12.9311	FTE1_peak_1478	chr13_94891378_94891733	GPC6;TTL	.	.
chr13	94901877	94902048	172	94901954	20.01	18.2604	9.37764	13.7189	FTE1_peak_1479	chr13_94901877_94902048	GPC6;TTL	.	.
chr13	95908426	95908598	173	95908524	20.01	18.2604	9.37764	13.7189	FTE1_peak_1480	chr13_95908426_95908598	ABCC4;TTL	.	.
chr13	95923659	95923984	326	95923738	17.5	13.6866	7.6703	9.48894	FTE1_peak_1481	chr13_95923659_95923984	ABCC4;TTL	.	.
chr13	96366601	96366960	360	96366881	18.75	12.4732	6.75382	8.38349	FTE1_peak_1482	chr13_96366601_96366960	DNAJC3;TTL	.	.
chr13	98598484	98598720	237	98598608	11.25	7.32276	5.00121	3.79961	FTE1_peak_1483	chr13_98598484_98598720	TTL	.	IPO5
chr13	99201385	99201541	157	99201479	13.75	8.60322	5.59379	4.91944	FTE1_peak_1484	chr13_99201385_99201541	STK24;TTL	.	.
chr13	99719457	99719652	196	99719531	16.88	13.4709	7.98214	9.27938	FTE1_peak_1485	chr13_99719457_99719652	DOCK9;TTL	.	.
chr13	99880973	99881235	263	99881019	10	6.7819	4.73231	3.38126	FTE1_peak_1486	chr13_99880973_99881235	MIR548AN;TTL;UBAC2	UBAC2-AS1	GPR18
chr13	100136780	100136913	134	100136847	15.63	12.332	7.42394	8.24545	FTE1_peak_1487	chr13_100136780_100136913	TTL	.	TM9SF2
chr13	100867233	100867426	194	100867357	18.13	13.748	7.28753	9.54549	FTE1_peak_1488	chr13_100867233_100867426	PCCA;TTL	.	.
chr13	101045094	101045228	135	101045154	12.5	9.07861	6.02844	5.34078	FTE1_peak_1489	chr13_101045094_101045228	PCCA;TTL	.	.
chr13	101528134	101528258	125	101528249	11.25	8.01672	5.44576	4.40147	FTE1_peak_1490	chr13_101528134_101528258	TTL	.	.
chr13	101540044	101540293	250	101540183	18.75	15.8213	8.81944	11.4425	FTE1_peak_1491	chr13_101540044_101540293	TTL	.	.
chr13	102102401	102102600	200	102102479	17.5	12.7333	7.0831	8.63344	FTE1_peak_1492	chr13_102102401_102102600	TTL	.	ITGBL1
chr13	102102735	102102941	207	102102879	15.63	10.7563	6.42671	6.85024	FTE1_peak_1493	chr13_102102735_102102941	TTL	.	ITGBL1
chr13	102164996	102165314	319	102165301	13.13	7.53305	4.70948	3.98652	FTE1_peak_1494	chr13_102164996_102165314	ITGBL1;TTL	.	.
chr13	102301973	102302185	213	102302044	17.5	14.6345	8.26124	10.362	FTE1_peak_1495	chr13_102301973_102302185	ITGBL1;TTL	.	.
chr13	102359061	102359246	186	102359179	15.63	11.5534	6.92879	7.57923	FTE1_peak_1496	chr13_102359061_102359246	ITGBL1;TTL	.	FGF14
chr13	102673283	102673432	150	102673358	16.88	11.6314	6.81121	7.65296	FTE1_peak_1497	chr13_102673283_102673432	FGF14;TTL	.	MIR4705
chr13	102938766	102939007	242	102938832	20.63	18.2604	9.65674	13.7189	FTE1_peak_1498	chr13_102938766_102939007	FGF14;TTL	.	FGF14-IT1
chr13	102948142	102948266	125	102948188	13.13	10.1341	6.30754	6.26448	FTE1_peak_1499	chr13_102948142_102948266	FGF14;FGF14-IT1;TTL	.	.
chr13	106756731	106756861	131	106756832	13.75	10.1341	6.58664	6.26448	FTE1_peak_1500	chr13_106756731_106756861	TTL	.	.
chr13	106785405	106785549	145	106785452	16.88	13.4709	7.98214	9.27938	FTE1_peak_1501	chr13_106785405_106785549	TTL	.	.
chr13	106808904	106809052	149	106809019	11.88	8.05487	5.74934	4.40147	FTE1_peak_1502	chr13_106808904_106809052	TTL	.	.
chr13	107031540	107031729	190	107031617	21.88	17.1546	8.75818	12.7044	FTE1_peak_1503	chr13_107031540_107031729	TTL	LINC00460	.
chr13	109511954	109512264	311	109512071	18.75	9.25272	4.93873	5.50444	FTE1_peak_1504	chr13_109511954_109512264	MYO16;TTL	.	.
chr13	109597285	109597424	140	109597364	18.75	9.25272	4.93873	5.50444	FTE1_peak_1505	chr13_109597285_109597424	MYO16;TTL	.	.
chr13	109616703	109616962	260	109616870	13.75	10.1341	6.58664	6.26448	FTE1_peak_1506	chr13_109616703_109616962	MYO16;TTL	.	.
chr13	109895826	109896377	552	109896185	23.13	18.6884	8.77493	14.1266	FTE1_peak_1507	chr13_109895826_109896377	TTL	.	.
chr13	109909463	109909684	222	109909573	26.26	26.0341	12.1686	21.0394	FTE1_peak_1508	chr13_109909463_109909684	TTL	.	.
chr13	109924507	109924785	279	109924627	20.63	18.2604	9.65674	13.7189	FTE1_peak_1509	chr13_109924507_109924785	TTL	.	.
chr13	109924892	109925601	710	109924982	17.5	6.60524	3.70092	3.22475	FTE1_peak_1510	chr13_109924892_109925601	TTL	.	.
chr13	109926041	109926341	301	109926085	13.13	10.1341	6.30754	6.26448	FTE1_peak_1511	chr13_109926041_109926341	TTL	.	.
chr13	109926484	109926867	384	109926604	21.88	19.5105	10.2149	14.8878	FTE1_peak_1512	chr13_109926484_109926867	TTL	.	.
chr13	109928802	109929029	228	109928838	10.63	7.06535	5.19114	3.5552	FTE1_peak_1513	chr13_109928802_109929029	TTL	.	.
chr13	109989171	109989304	134	109989210	16.25	13.4709	7.70304	9.27938	FTE1_peak_1514	chr13_109989171_109989304	TTL	.	.
chr13	110034354	110034543	190	110034442	15.63	12.332	7.42394	8.24545	FTE1_peak_1515	chr13_110034354_110034543	TTL	.	.
chr13	110036205	110036395	191	110036296	15	12.332	7.14484	8.24545	FTE1_peak_1516	chr13_110036205_110036395	TTL	.	.
chr13	110042054	110042360	307	110042325	13.75	10.1341	6.58664	6.26448	FTE1_peak_1517	chr13_110042054_110042360	TTL	.	.
chr13	110351205	110351376	172	110351283	21.88	19.5105	10.2149	14.8878	FTE1_peak_1518	chr13_110351205_110351376	TTL	.	.
chr13	110492706	110493095	390	110492985	17.5	14.6345	8.26124	10.362	FTE1_peak_1519	chr13_110492706_110493095	TTL	.	.
chr13	110658681	110659025	345	110658778	20.63	18.2604	9.65674	13.7189	FTE1_peak_1520	chr13_110658681_110659025	TTL	.	.
chr13	110975559	110975683	125	110975572	11.25	8.05487	5.47024	4.40147	FTE1_peak_1521	chr13_110975559_110975683	COL4A2;TTL	COL4A1	.
chr13	111000489	111000650	162	111000581	16.88	10.2513	5.95981	6.36151	FTE1_peak_1522	chr13_111000489_111000650	COL4A2;TTL	.	.
chr13	111043001	111043184	184	111043125	20.01	8.71601	4.20105	5.02614	FTE1_peak_1523	chr13_111043001_111043184	COL4A2;TTL	.	.
chr13	111046765	111047115	351	111046854	17.5	14.6345	8.26124	10.362	FTE1_peak_1524	chr13_111046765_111047115	COL4A2;TTL	.	.
chr13	111049317	111049479	163	111049417	16.25	13.4709	7.70304	9.27938	FTE1_peak_1525	chr13_111049317_111049479	COL4A2;TTL	.	.
chr13	111049622	111049831	210	111049762	13.13	10.1341	6.30754	6.26448	FTE1_peak_1526	chr13_111049622_111049831	COL4A2;TTL	.	.
chr13	111055742	111055968	227	111055848	26.88	26.0341	12.4477	21.0394	FTE1_peak_1527	chr13_111055742_111055968	COL4A2;TTL	.	.
chr13	113832576	113832732	157	113832625	18.13	9.25272	4.78244	5.50444	FTE1_peak_1528	chr13_113832576_113832732	PCID2	F10;PROZ	.
chr13	113841829	113841975	147	113841926	18.13	12.5708	6.59647	8.47929	FTE1_peak_1529	chr13_113841829_113841975	PCID2	PROZ	CUL4A
chr13	114489179	114489521	343	114489432	18.13	13.3512	7.05245	9.22155	FTE1_peak_1530	chr13_114489179_114489521	FAM70B	.	.
chr13	114600232	114600473	242	114600365	24.38	20.5971	9.6691	15.9339	FTE1_peak_1531	chr13_114600232_114600473	FLJ44054	.	.
chr13	114619291	114619449	159	114619338	19.38	12.2707	6.2708	8.24545	FTE1_peak_1532	chr13_114619291_114619449	FLJ44054	.	.
chr13	114630877	114631012	136	114630945	30.01	12.0832	4.35198	8.08494	FTE1_peak_1533	chr13_114630877_114631012	.	FLJ44054	.
chr14	22764713	22764850	138	22764783	18.75	15.5303	8.63603	11.2148	FTE1_peak_1534	chr14_22764713_22764850	.	.	.
chr14	23005926	23006085	160	23006015	18.75	15.8213	8.81944	11.4425	FTE1_peak_1535	chr14_23005926_23006085	.	.	DAD1
chr14	23083145	23083353	209	23083252	22.51	14.2981	6.71597	10.0676	FTE1_peak_1536	chr14_23083145_23083353	.	ABHD4;DAD1	.
chr14	23083482	23083643	162	23083483	12.5	5.86251	4.00097	2.57335	FTE1_peak_1537	chr14_23083482_23083643	.	ABHD4;DAD1	.
chr14	23116077	23116201	125	23116126	13.13	10.1341	6.30754	6.26448	FTE1_peak_1538	chr14_23116077_23116201	.	.	.
chr14	23158536	23158747	212	23158654	20.63	14.7511	7.52362	10.4747	FTE1_peak_1539	chr14_23158536_23158747	.	.	.
chr14	24502402	24502532	131	24502489	20.01	13.2431	6.46315	9.11812	FTE1_peak_1540	chr14_24502402_24502532	.	DHRS4L2	DHRS4L1;LRRC16B
chr14	25580615	25580743	129	25580650	13.75	10.1341	6.58664	6.26448	FTE1_peak_1541	chr14_25580615_25580743	.	.	.
chr14	30132504	30132676	173	30132620	13.13	10.1341	6.30754	6.26448	FTE1_peak_1542	chr14_30132504_30132676	MIR548AI;PRKD1	.	.
chr14	30663068	30663453	386	30663241	33.13	16.81	5.68895	12.3956	FTE1_peak_1543	chr14_30663068_30663453	.	.	.
chr14	30664794	30664949	156	30664866	17.5	14.6345	8.26124	10.362	FTE1_peak_1544	chr14_30664794_30664949	.	.	.
chr14	30665174	30665319	146	30665213	12.5	9.07861	6.02844	5.34078	FTE1_peak_1545	chr14_30665174_30665319	.	.	.
chr14	30665475	30665622	148	30665550	15.63	12.332	7.42394	8.24545	FTE1_peak_1546	chr14_30665475_30665622	.	.	.
chr14	30692654	30692866	213	30692700	10.63	7.06535	5.19114	3.5552	FTE1_peak_1547	chr14_30692654_30692866	.	.	.
chr14	31635043	31635187	145	31635115	12.5	8.32299	5.53981	4.65894	FTE1_peak_1548	chr14_31635043_31635187	HECTD1	.	.
chr14	31974265	31974389	125	31974372	12.5	9.07861	6.02844	5.34078	FTE1_peak_1549	chr14_31974265_31974389	.	GPR33	.
chr14	33081051	33081196	146	33081114	20.01	8.71601	4.20105	5.02614	FTE1_peak_1550	chr14_33081051_33081196	AKAP6	.	.
chr14	34116714	34116906	193	34116792	14.38	8.41215	5.12626	4.73758	FTE1_peak_1551	chr14_34116714_34116906	NPAS3	.	.
chr14	34459110	34459387	278	34459215	27.51	27.3886	12.7268	22.3388	FTE1_peak_1552	chr14_34459110_34459387	.	.	.
chr14	34930113	34930278	166	34930197	16.25	11.3783	6.42019	7.40844	FTE1_peak_1553	chr14_34930113_34930278	SPTSSA	.	.
chr14	34972271	34972426	156	34972326	17.5	11.4765	6.32636	7.50444	FTE1_peak_1554	chr14_34972271_34972426	.	.	EAPP
chr14	35120268	35120404	137	35120288	13.13	8.9461	5.56786	5.24902	FTE1_peak_1555	chr14_35120268_35120404	.	SNX6	.
chr14	35169416	35169576	161	35169496	17.5	6.60524	3.70092	3.22475	FTE1_peak_1556	chr14_35169416_35169576	.	.	CFL2
chr14	35250559	35250748	190	35250641	15	12.2799	7.11286	8.24545	FTE1_peak_1557	chr14_35250559_35250748	BAZ1A	.	.
chr14	35870096	35870316	221	35870193	16.25	8.2627	4.63202	4.60056	FTE1_peak_1558	chr14_35870096_35870316	.	.	NFKBIA
chr14	36763094	36763260	167	36763156	20.01	16.6313	8.4021	12.2207	FTE1_peak_1559	chr14_36763094_36763260	.	.	MBIP
chr14	37465879	37466021	143	37465955	18.13	15.8213	8.54034	11.4425	FTE1_peak_1560	chr14_37465879_37466021	SLC25A21	.	.
chr14	38148302	38148461	160	38148406	15.63	12.332	7.42394	8.24545	FTE1_peak_1561	chr14_38148302_38148461	.	.	.
chr14	38567705	38567886	182	38567805	15	12.332	7.14484	8.24545	FTE1_peak_1562	chr14_38567705_38567886	.	.	.
chr14	38759815	38760107	293	38759946	24.38	23.373	11.3313	18.5309	FTE1_peak_1563	chr14_38759815_38760107	.	.	.
chr14	38809064	38809194	131	38809099	14.38	8.41215	5.12626	4.73758	FTE1_peak_1564	chr14_38809064_38809194	.	.	.
chr14	50442090	50442284	195	50442199	20.63	16.9936	8.87402	12.5716	FTE1_peak_1565	chr14_50442090_50442284	.	.	C14orf182
chr14	50449157	50449567	411	50449489	18.13	12.1886	6.37659	8.17106	FTE1_peak_1566	chr14_50449157_50449567	C14orf182	.	.
chr14	50799707	50799875	169	50799782	14.38	11.2192	6.86574	7.25339	FTE1_peak_1567	chr14_50799707_50799875	CDKL1	ATP5S;L2HGDH	.
chr14	51230277	51230431	155	51230367	25.63	24.6954	11.8895	19.7748	FTE1_peak_1568	chr14_51230277_51230431	NIN	.	.
chr14	51428643	51428895	253	51428756	16.25	10.2513	5.75142	6.36151	FTE1_peak_1569	chr14_51428643_51428895	.	PYGL	TRIM9
chr14	51863002	51863146	145	51863057	19.38	14.2477	7.41094	10.0185	FTE1_peak_1570	chr14_51863002_51863146	.	.	.
chr14	51863510	51863718	209	51863602	13.13	10.1341	6.30754	6.26448	FTE1_peak_1571	chr14_51863510_51863718	.	.	.
chr14	51909438	51909639	202	51909558	11.88	8.05487	5.74934	4.40147	FTE1_peak_1572	chr14_51909438_51909639	.	.	.
chr14	51909737	51909928	192	51909781	11.25	8.05487	5.47024	4.40147	FTE1_peak_1573	chr14_51909737_51909928	.	.	.
chr14	52021257	52021414	158	52021323	18.13	12.1886	6.37659	8.17106	FTE1_peak_1574	chr14_52021257_52021414	FRMD6	.	.
chr14	52047991	52048157	167	52048075	13.13	10.1341	6.30754	6.26448	FTE1_peak_1575	chr14_52047991_52048157	FRMD6	.	.
chr14	52070638	52070762	125	52070753	13.75	7.53305	4.91787	3.98652	FTE1_peak_1576	chr14_52070638_52070762	FRMD6	.	.
chr14	52070993	52071120	128	52071087	11.88	8.05487	5.74934	4.40147	FTE1_peak_1577	chr14_52070993_52071120	FRMD6	.	.
chr14	52294765	52294905	141	52294836	18.75	12.1886	6.58497	8.17106	FTE1_peak_1578	chr14_52294765_52294905	.	.	.
chr14	52492081	52492268	188	52492156	16.88	13.4709	7.98214	9.27938	FTE1_peak_1579	chr14_52492081_52492268	NID2	C14orf166	.
chr14	52543170	52543395	226	52543272	26.88	22.207	10.1389	17.4218	FTE1_peak_1580	chr14_52543170_52543395	.	NID2	.
chr14	52795110	52795272	163	52795182	19.38	17.0303	9.09854	12.5833	FTE1_peak_1581	chr14_52795110_52795272	PTGER2	.	.
chr14	52821814	52822186	373	52821928	18.75	9.25272	4.93873	5.50444	FTE1_peak_1582	chr14_52821814_52822186	.	PTGER2	.
chr14	52836048	52836247	200	52836153	16.25	13.4709	7.70304	9.27938	FTE1_peak_1583	chr14_52836048_52836247	.	.	.
chr14	52922452	52922743	292	52922542	11.88	8.05487	5.74934	4.40147	FTE1_peak_1584	chr14_52922452_52922743	TXNDC16	.	.
chr14	52924737	52925032	296	52924855	33.13	35.8175	15.2387	30.4096	FTE1_peak_1585	chr14_52924737_52925032	TXNDC16	.	.
chr14	53301430	53301760	331	53301560	16.88	12.9516	7.64895	8.84166	FTE1_peak_1586	chr14_53301430_53301760	.	.	FERMT2
chr14	53498949	53499274	326	53499030	16.25	13.4709	7.70304	9.27938	FTE1_peak_1587	chr14_53498949_53499274	.	.	DDHD1
chr14	54718763	54719017	255	54718869	16.88	7.66459	4.46986	4.10596	FTE1_peak_1588	chr14_54718763_54719017	.	.	.
chr14	54778956	54779140	185	54779026	23.13	22.0676	10.7731	17.2871	FTE1_peak_1589	chr14_54778956_54779140	.	.	.
chr14	55150964	55151124	161	55151058	16.25	10.2513	5.75142	6.36151	FTE1_peak_1590	chr14_55150964_55151124	SAMD4A	.	.
chr14	55402817	55403070	254	55402911	13.13	10.1341	6.30754	6.26448	FTE1_peak_1591	chr14_55402817_55403070	.	.	WDHD1
chr14	56314515	56314696	182	56314586	13.13	9.55984	5.94882	5.78139	FTE1_peak_1592	chr14_56314515_56314696	.	.	.
chr14	58300052	58300239	188	58300124	18.13	5.85335	3.18829	2.57335	FTE1_peak_1593	chr14_58300052_58300239	SLC35F4	.	.
chr14	59198438	59198582	145	59198484	10.63	5.92509	4.42963	2.62852	FTE1_peak_1594	chr14_59198438_59198582	.	.	.
chr14	59205020	59205190	171	59205111	15	12.332	7.14484	8.24545	FTE1_peak_1595	chr14_59205020_59205190	.	.	.
chr14	59213180	59213321	142	59213248	11.88	5.86499	4.29271	2.57335	FTE1_peak_1596	chr14_59213180_59213321	.	.	.
chr14	59365385	59365724	340	59365508	23.13	22.0676	10.7731	17.2871	FTE1_peak_1597	chr14_59365385_59365724	.	.	.
chr14	59366124	59366260	137	59366233	15.63	9.31879	5.54303	5.55219	FTE1_peak_1598	chr14_59366124_59366260	.	.	.
chr14	59565215	59565348	134	59565302	15.63	5.31046	3.32582	2.06898	FTE1_peak_1599	chr14_59565215_59565348	.	.	.
chr14	59719233	59719396	164	59719278	15	12.332	7.14484	8.24545	FTE1_peak_1600	chr14_59719233_59719396	DAAM1	.	.
chr14	59772152	59772399	248	59772326	11.88	8.05487	5.74934	4.40147	FTE1_peak_1601	chr14_59772152_59772399	DAAM1	.	.
chr14	59906074	59906248	175	59906174	15.63	12.332	7.42394	8.24545	FTE1_peak_1602	chr14_59906074_59906248	.	.	GPR135
chr14	60144561	60144828	268	60144758	18.75	12.1886	6.58497	8.17106	FTE1_peak_1603	chr14_60144561_60144828	RTN1	.	.
chr14	60561011	60561290	280	60561188	23.13	17.8304	8.28535	13.3498	FTE1_peak_1604	chr14_60561011_60561290	C14orf135	.	.
chr14	61641867	61642051	185	61641950	23.13	11.0053	4.82621	7.08926	FTE1_peak_1605	chr14_61641867_61642051	.	.	.
chr14	61645585	61645809	225	61645695	23.13	18.3486	8.57994	13.8056	FTE1_peak_1606	chr14_61645585_61645809	.	.	.
chr14	61650914	61651082	169	61651012	26.26	13.452	5.45138	9.27938	FTE1_peak_1607	chr14_61650914_61651082	.	.	.
chr14	61932931	61933131	201	61933023	30.63	29.0868	12.6532	23.9482	FTE1_peak_1608	chr14_61932931_61933131	PRKCH	.	.
chr14	61939024	61939461	438	61939166	38.14	43.1919	17.4715	37.567	FTE1_peak_1609	chr14_61939024_61939461	PRKCH	.	.
chr14	61943564	61943820	257	61943700	18.13	9.25272	4.78244	5.50444	FTE1_peak_1610	chr14_61943564_61943820	PRKCH	.	.
chr14	62020477	62020768	292	62020676	27.51	16.9362	6.91084	12.5178	FTE1_peak_1611	chr14_62020477_62020768	.	PRKCH	FLJ22447
chr14	62027969	62028107	139	62028029	16.88	13.4709	7.98214	9.27938	FTE1_peak_1612	chr14_62027969_62028107	.	PRKCH	FLJ22447
chr14	62028226	62029012	787	62028535	21.26	19.5105	9.93584	14.8878	FTE1_peak_1613	chr14_62028226_62029012	.	PRKCH	FLJ22447
chr14	62031528	62031704	177	62031591	18.75	12.1886	6.58497	8.17106	FTE1_peak_1614	chr14_62031528_62031704	.	PRKCH	FLJ22447
chr14	62036691	62036842	152	62036692	14.38	6.17368	3.84469	2.81294	FTE1_peak_1615	chr14_62036691_62036842	.	PRKCH	FLJ22447
chr14	62061141	62061443	303	62061320	28.13	28.7582	13.0059	23.6384	FTE1_peak_1616	chr14_62061141_62061443	FLJ22447	.	.
chr14	62127363	62127494	132	62127452	12.5	9.07861	6.02844	5.34078	FTE1_peak_1617	chr14_62127363_62127494	.	FLJ22447	.
chr14	62178689	62178827	139	62178778	11.25	8.05487	5.47024	4.40147	FTE1_peak_1618	chr14_62178689_62178827	HIF1A	.	.
chr14	62187046	62187317	272	62187243	13.13	10.0335	6.24462	6.23896	FTE1_peak_1619	chr14_62187046_62187317	HIF1A	.	HIF1A-AS2
chr14	62193760	62193980	221	62193870	15	11.6107	6.70322	7.63521	FTE1_peak_1620	chr14_62193760_62193980	HIF1A	.	HIF1A-AS2
chr14	62201731	62201855	125	62201767	15.63	10.6093	6.3349	6.70697	FTE1_peak_1621	chr14_62201731_62201855	HIF1A	.	HIF1A-AS2;SNAPC1
chr14	62203689	62203857	169	62203711	14.38	8.41215	5.12626	4.73758	FTE1_peak_1622	chr14_62203689_62203857	HIF1A	.	HIF1A-AS2;SNAPC1
chr14	62205085	62205271	187	62205174	11.25	7.01492	4.80508	3.5552	FTE1_peak_1623	chr14_62205085_62205271	HIF1A	.	HIF1A-AS2;SNAPC1
chr14	62205817	62205944	128	62205830	11.88	6.97803	5.02561	3.5552	FTE1_peak_1624	chr14_62205817_62205944	HIF1A	.	HIF1A-AS2;SNAPC1
chr14	62206403	62206528	126	62206499	12.5	7.9426	5.2954	4.37148	FTE1_peak_1625	chr14_62206403_62206528	HIF1A	.	HIF1A-AS2;SNAPC1
chr14	62206982	62207143	162	62207088	12.5	8.0244	5.34783	4.40147	FTE1_peak_1626	chr14_62206982_62207143	HIF1A	.	HIF1A-AS2;SNAPC1
chr14	62210665	62210836	172	62210748	15.63	10.7563	6.42671	6.85024	FTE1_peak_1627	chr14_62210665_62210836	HIF1A	.	HIF1A-AS2;SNAPC1
chr14	62211885	62212009	125	62211939	15	11.2213	6.46624	7.25507	FTE1_peak_1628	chr14_62211885_62212009	HIF1A	.	HIF1A-AS2;SNAPC1
chr14	62216212	62216520	309	62216280	21.88	14.1402	6.98649	9.92772	FTE1_peak_1629	chr14_62216212_62216520	.	HIF1A;HIF1A-AS2	SNAPC1
chr14	62216643	62217349	707	62216998	21.88	14.1402	6.98649	9.92772	FTE1_peak_1630	chr14_62216643_62217349	.	HIF1A;HIF1A-AS2	SNAPC1
chr14	62222188	62222315	128	62222264	18.75	11.3193	6.07844	7.35029	FTE1_peak_1631	chr14_62222188_62222315	.	HIF1A;HIF1A-AS2	SNAPC1
chr14	62401062	62401336	275	62401220	19.38	13.1909	6.79336	9.0676	FTE1_peak_1632	chr14_62401062_62401336	.	.	.
chr14	62431847	62432059	213	62431954	21.26	15.2574	7.41853	10.9537	FTE1_peak_1633	chr14_62431847_62432059	.	.	.
chr14	63937963	63938214	252	63938041	16.88	12.1714	7.15177	8.16651	FTE1_peak_1634	chr14_63937963_63938214	PPP2R5E	.	.
chr14	64549779	64550032	254	64549940	16.25	13.4709	7.70304	9.27938	FTE1_peak_1635	chr14_64549779_64550032	SYNE2	.	.
chr14	64699289	64699431	143	64699356	13.13	10.1341	6.30754	6.26448	FTE1_peak_1636	chr14_64699289_64699431	ESR2	SYNE2	.
chr14	65003393	65003580	188	65003466	23.13	12.0945	5.31814	8.09534	FTE1_peak_1637	chr14_65003393_65003580	.	ZBTB1	HSPA2;PPP1R36
chr14	65112162	65112427	266	65112335	13.13	10.1341	6.30754	6.26448	FTE1_peak_1638	chr14_65112162_65112427	.	.	.
chr14	65704027	65704151	125	65704071	14.38	10.8214	6.61453	6.91344	FTE1_peak_1639	chr14_65704027_65704151	.	.	.
chr14	65705276	65705487	212	65705387	22.51	18.2382	8.95463	13.7189	FTE1_peak_1640	chr14_65705276_65705487	.	.	.
chr14	65705878	65706014	137	65705930	14.38	8.78209	5.34914	5.09003	FTE1_peak_1641	chr14_65705878_65706014	.	.	.
chr14	65757702	65757843	142	65757757	18.13	5.85335	3.18829	2.57335	FTE1_peak_1642	chr14_65757702_65757843	.	.	.
chr14	66258430	66258785	356	66258537	21.26	17.799	8.90223	13.3191	FTE1_peak_1643	chr14_66258430_66258785	.	.	.
chr14	67688389	67688655	267	67688528	29.38	25.6068	10.8996	20.6569	FTE1_peak_1644	chr14_67688389_67688655	FAM71D	.	MPP5
chr14	68607091	68607242	152	68607142	11.25	8.05487	5.47024	4.40147	FTE1_peak_1645	chr14_68607091_68607242	RAD51B	.	.
chr14	68613727	68613894	168	68613771	15.63	12.332	7.42394	8.24545	FTE1_peak_1646	chr14_68613727_68613894	RAD51B	.	.
chr14	68677705	68678010	306	68677927	13.75	10.1341	6.58664	6.26448	FTE1_peak_1647	chr14_68677705_68678010	RAD51B	.	.
chr14	69014357	69014609	253	69014561	16.25	11.6314	6.57305	7.65296	FTE1_peak_1648	chr14_69014357_69014609	RAD51B	.	.
chr14	69015753	69016140	388	69016096	12.5	6.6833	4.50109	3.28667	FTE1_peak_1649	chr14_69015753_69016140	RAD51B	.	.
chr14	69017323	69017447	125	69017398	11.88	6.79844	4.90595	3.39491	FTE1_peak_1650	chr14_69017323_69017447	RAD51B	.	.
chr14	69044664	69044841	178	69044745	23.76	14.8257	6.82931	10.5476	FTE1_peak_1651	chr14_69044664_69044841	RAD51B	.	.
chr14	69149771	69149898	128	69149784	15.63	12.332	7.42394	8.24545	FTE1_peak_1652	chr14_69149771_69149898	.	.	.
chr14	69154552	69154749	198	69154667	15.63	10.9072	6.52122	6.99744	FTE1_peak_1653	chr14_69154552_69154749	.	.	.
chr14	69251670	69251825	156	69251724	13.13	9.71286	6.04425	5.92945	FTE1_peak_1654	chr14_69251670_69251825	.	.	ZFP36L1
chr14	69252882	69253116	235	69252921	15	9.63462	5.5186	5.85333	FTE1_peak_1655	chr14_69252882_69253116	.	.	ZFP36L1
chr14	69253286	69253901	616	69253800	18.13	12.5218	6.56816	8.431	FTE1_peak_1656	chr14_69253286_69253901	.	.	ZFP36L1
chr14	69255254	69255473	220	69255372	17.5	8.44714	4.62615	4.77024	FTE1_peak_1657	chr14_69255254_69255473	ZFP36L1	.	.
chr14	69408644	69408855	212	69408744	20.01	8.71601	4.20105	5.02614	FTE1_peak_1658	chr14_69408644_69408855	ACTN1	.	.
chr14	70186263	70186407	145	70186313	16.88	10.2513	5.95981	6.36151	FTE1_peak_1659	chr14_70186263_70186407	.	KIAA0247	.
chr14	71597509	71597637	129	71597542	13.13	10.1341	6.30754	6.26448	FTE1_peak_1660	chr14_71597509_71597637	.	PCNX	.
chr14	71608960	71609104	145	71609054	18.13	12.1886	6.37659	8.17106	FTE1_peak_1661	chr14_71608960_71609104	.	PCNX	.
chr14	71839134	71839364	231	71839235	18.13	13.1342	6.9248	9.02046	FTE1_peak_1662	chr14_71839134_71839364	.	.	SNORD56B
chr14	72181043	72181259	217	72181148	20.01	14.2141	7.00175	9.98737	FTE1_peak_1663	chr14_72181043_72181259	SIPA1L1	.	.
chr14	73132107	73132275	169	73132185	18.13	15.8213	8.54034	11.4425	FTE1_peak_1664	chr14_73132107_73132275	.	.	DPF3
chr14	73212380	73212553	174	73212436	18.13	13.6323	7.21878	9.43519	FTE1_peak_1665	chr14_73212380_73212553	DPF3	.	.
chr14	73248500	73248640	141	73248558	18.75	12.1886	6.58497	8.17106	FTE1_peak_1666	chr14_73248500_73248640	DPF3	.	.
chr14	73268098	73268266	169	73268166	14.38	11.2192	6.86574	7.25339	FTE1_peak_1667	chr14_73268098_73268266	DPF3	.	.
chr14	73429700	73429996	297	73429780	18.75	11.7396	6.32158	7.75347	FTE1_peak_1668	chr14_73429700_73429996	.	DCAF4	ZFYVE1
chr14	73930340	73930464	125	73930426	16.25	13.4709	7.70304	9.27938	FTE1_peak_1669	chr14_73930340_73930464	.	NUMB	C14orf169;HEATR4
chr14	74163209	74163505	297	74163323	19.38	10.0802	5.09502	6.26448	FTE1_peak_1670	chr14_74163209_74163505	DNAL1	.	C14orf43;PNMA1
chr14	75038576	75039151	576	75038705	43.14	48.5893	18.3901	42.8183	FTE1_peak_1671	chr14_75038576_75039151	LTBP2	.	.
chr14	75086438	75086618	181	75086526	19.38	13.1909	6.79336	9.0676	FTE1_peak_1672	chr14_75086438_75086618	.	LTBP2	.
chr14	75352725	75352899	175	75352819	26.26	16.2786	6.75093	11.887	FTE1_peak_1673	chr14_75352725_75352899	DLST	PROX2	RPS6KL1
chr14	75649721	75649874	154	75649822	15.63	11.9663	7.19096	7.97128	FTE1_peak_1674	chr14_75649721_75649874	.	TMED10	.
chr14	75688922	75689115	194	75688994	17.5	13.1928	7.36501	9.06947	FTE1_peak_1675	chr14_75688922_75689115	.	.	.
chr14	76002294	76002448	155	76002380	17.5	14.6345	8.26124	10.362	FTE1_peak_1676	chr14_76002294_76002448	BATF	.	.
chr14	76114760	76114887	128	76114799	18.75	10.5524	5.64426	6.65597	FTE1_peak_1677	chr14_76114760_76114887	.	FLVCR2	C14orf1;TTLL5
chr14	77923949	77924122	174	77924055	25.01	11.2404	4.62339	7.27383	FTE1_peak_1678	chr14_77923949_77924122	C14orf133	.	AHSA1;ISM2
chr14	79433860	79433999	140	79433952	15	12.332	7.14484	8.24545	FTE1_peak_1679	chr14_79433860_79433999	NRXN3	.	.
chr14	79478321	79478447	127	79478388	15	12.332	7.14484	8.24545	FTE1_peak_1680	chr14_79478321_79478447	NRXN3	.	.
chr14	79483310	79483484	175	79483403	16.25	13.4709	7.70304	9.27938	FTE1_peak_1681	chr14_79483310_79483484	NRXN3	.	.
chr14	79523382	79523583	202	79523468	11.88	8.05487	5.74934	4.40147	FTE1_peak_1682	chr14_79523382_79523583	NRXN3	.	.
chr14	80062930	80063150	221	80063003	31.88	21.4139	8.22084	16.6939	FTE1_peak_1683	chr14_80062930_80063150	NRXN3	.	.
chr14	80064708	80064964	257	80064907	11.88	8.05487	5.74934	4.40147	FTE1_peak_1684	chr14_80064708_80064964	NRXN3	.	.
chr14	80322857	80323061	205	80323007	12.5	9.07861	6.02844	5.34078	FTE1_peak_1685	chr14_80322857_80323061	NRXN3	.	.
chr14	80855233	80855670	438	80855572	27.51	14.2995	5.70144	10.0686	FTE1_peak_1686	chr14_80855233_80855670	LOC100628307	.	.
chr14	80892018	80892360	343	80892171	20.63	14.2141	7.21014	9.98737	FTE1_peak_1687	chr14_80892018_80892360	LOC100628307	.	.
chr14	81397340	81397513	174	81397449	13.13	10.1341	6.30754	6.26448	FTE1_peak_1688	chr14_81397340_81397513	CEP128	.	TSHR
chr14	81867206	81867558	353	81867449	18.75	15.8213	8.81944	11.4425	FTE1_peak_1689	chr14_81867206_81867558	STON2	.	.
chr14	87262620	87262784	165	87262671	18.13	15.7587	8.50212	11.4346	FTE1_peak_1690	chr14_87262620_87262784	.	.	.
chr14	87265652	87266003	352	87265814	32.51	34.2673	14.8927	28.9291	FTE1_peak_1691	chr14_87265652_87266003	.	.	.
chr14	89892377	89892604	228	89892544	28.76	6.11664	2.70523	2.76175	FTE1_peak_1692	chr14_89892377_89892604	FOXN3	LOC400236	.
chr14	89973961	89974245	285	89974222	17.5	6.60524	3.70092	3.22475	FTE1_peak_1693	chr14_89973961_89974245	FOXN3	.	.
chr14	90097293	90097460	168	90097406	11.25	8.05487	5.47024	4.40147	FTE1_peak_1694	chr14_90097293_90097460	.	FOXN3	.
chr14	91575403	91575713	311	91575512	25.01	19.1049	8.38921	14.5328	FTE1_peak_1695	chr14_91575403_91575713	.	.	C14orf159;SNORA11B
chr14	93112242	93112370	129	93112332	20.63	10.9285	5.4076	7.01523	FTE1_peak_1696	chr14_93112242_93112370	RIN3	.	.
chr14	93196396	93196526	131	93196475	19.38	10.0802	5.09502	6.26448	FTE1_peak_1697	chr14_93196396_93196526	LGMN	.	.
chr14	95067226	95067389	164	95067361	22.51	17.5499	8.5476	13.077	FTE1_peak_1698	chr14_95067226_95067389	.	SERPINA5	SERPINA3
chr14	95076994	95077233	240	95077166	11.88	8.01672	5.72361	4.40147	FTE1_peak_1699	chr14_95076994_95077233	.	SERPINA5	SERPINA13;SERPINA3
chr14	95731889	95732128	240	95731982	21.26	17.6514	8.81409	13.176	FTE1_peak_1700	chr14_95731889_95732128	CLMN	.	.
chr14	96588942	96589084	143	96588985	13.13	10.1341	6.30754	6.26448	FTE1_peak_1701	chr14_96588942_96589084	.	C14orf132	.
chr14	100288132	100288296	165	100288198	18.13	15.8213	8.54034	11.4425	FTE1_peak_1702	chr14_100288132_100288296	EML1	.	.
chr14	100497823	100498176	354	100497987	20.63	8.71601	4.32608	5.02614	FTE1_peak_1703	chr14_100497823_100498176	.	.	.
chr14	102746191	102746632	442	102746392	31.26	30.4165	12.9033	25.2284	FTE1_peak_1704	chr14_102746191_102746632	MOK	.	.
chr14	102746763	102747078	316	102746993	18.13	10.9244	5.66808	7.01389	FTE1_peak_1705	chr14_102746763_102747078	MOK	.	.
chr14	103660717	103660881	165	103660810	29.38	24.2325	10.1276	19.3595	FTE1_peak_1706	chr14_103660717_103660881	.	LOC100131366	.
chr15	26129124	26129270	147	26129189	14.38	8.41215	5.12626	4.73758	FTE1_peak_1707	chr15_26129124_26129270	DDX11L1;MIR4509-1;MIR4509-2;MIR4509-3	ATP10A	LOC100128714
chr15	29904271	29904661	391	29904523	19.38	5.28566	2.91144	2.04645	FTE1_peak_1708	chr15_29904271_29904661	DDX11L1	.	.
chr15	30217113	30217383	271	30217305	13.75	9.97864	6.4851	6.18605	FTE1_peak_1709	chr15_30217113_30217383	DDX11L1	.	.
chr15	30357392	30357696	305	30357482	15	12.332	7.14484	8.24545	FTE1_peak_1710	chr15_30357392_30357696	DDX11L1	.	.
chr15	30373166	30373312	147	30373225	16.25	13.4709	7.70304	9.27938	FTE1_peak_1711	chr15_30373166_30373312	DDX11L1	.	ULK4P3
chr15	31316658	31316926	269	31316819	27.51	27.3886	12.7268	22.3388	FTE1_peak_1712	chr15_31316658_31316926	DDX11L1;TRPM1;ULK4P1;ULK4P2;ULK4P3	.	.
chr15	32974902	32975058	157	32974965	14.38	11.2192	6.86574	7.25339	FTE1_peak_1713	chr15_32974902_32975058	DDX11L1;SCG5	.	.
chr15	33011945	33012112	168	33012028	23.13	9.84325	4.32844	6.05534	FTE1_peak_1714	chr15_33011945_33012112	DDX11L1;GREM1	SCG5	.
chr15	33015837	33016153	317	33015915	22.51	13.6122	6.35295	9.41581	FTE1_peak_1715	chr15_33015837_33016153	DDX11L1;GREM1	SCG5	.
chr15	33016285	33016542	258	33016445	14.38	9.26464	5.64359	5.51629	FTE1_peak_1716	chr15_33016285_33016542	DDX11L1;GREM1	SCG5	.
chr15	33016671	33016876	206	33016761	15	11.0621	6.36973	7.14459	FTE1_peak_1717	chr15_33016671_33016876	DDX11L1;GREM1	SCG5	.
chr15	33020806	33021057	252	33021052	13.75	5.46828	3.6884	2.2132	FTE1_peak_1718	chr15_33020806_33021057	DDX11L1;GREM1	.	.
chr15	33021860	33022268	409	33022116	18.75	12.1886	6.58497	8.17106	FTE1_peak_1719	chr15_33021860_33022268	DDX11L1;GREM1	.	.
chr15	33022390	33022761	372	33022650	17.5	13.2526	7.40184	9.12596	FTE1_peak_1720	chr15_33022390_33022761	DDX11L1;GREM1	.	.
chr15	33026010	33026147	138	33026088	16.88	13.4709	7.98214	9.27938	FTE1_peak_1721	chr15_33026010_33026147	DDX11L1;GREM1	.	.
chr15	33026823	33027166	344	33026868	21.88	19.4374	10.1692	14.8527	FTE1_peak_1722	chr15_33026823_33027166	DDX11L1;GREM1	.	.
chr15	33027301	33027604	304	33027337	16.88	10.2513	5.95981	6.36151	FTE1_peak_1723	chr15_33027301_33027604	DDX11L1	GREM1	.
chr15	33027955	33028079	125	33027993	16.88	11.1353	6.50161	7.2111	FTE1_peak_1724	chr15_33027955_33028079	DDX11L1	GREM1	FMN1
chr15	33028299	33029078	780	33028985	20.01	18.2604	9.37764	13.7189	FTE1_peak_1725	chr15_33028299_33029078	DDX11L1	GREM1	FMN1
chr15	33029208	33030072	865	33029807	20.63	18.2604	9.65674	13.7189	FTE1_peak_1726	chr15_33029208_33030072	DDX11L1	GREM1	FMN1
chr15	33030195	33032479	2285	33031127	22.51	6.99767	3.35799	3.5552	FTE1_peak_1727	chr15_33030195_33032479	DDX11L1	GREM1	FMN1
chr15	33065898	33066610	713	33066501	17.5	14.6345	8.26124	10.362	FTE1_peak_1728	chr15_33065898_33066610	DDX11L1;FMN1	.	.
chr15	33094621	33094859	239	33094706	22.51	18.2382	8.95463	13.7189	FTE1_peak_1729	chr15_33094621_33094859	DDX11L1;FMN1	.	.
chr15	33116994	33117216	223	33117099	18.75	15.8213	8.81944	11.4425	FTE1_peak_1730	chr15_33116994_33117216	DDX11L1;FMN1	.	.
chr15	33120768	33120978	211	33120861	25.63	22.6539	10.6527	17.854	FTE1_peak_1731	chr15_33120768_33120978	DDX11L1;FMN1	.	.
chr15	33131053	33131256	204	33131139	15.63	9.31879	5.54303	5.55219	FTE1_peak_1732	chr15_33131053_33131256	DDX11L1;FMN1	.	.
chr15	33142397	33142749	353	33142603	41.26	43.1164	16.1764	37.5038	FTE1_peak_1733	chr15_33142397_33142749	DDX11L1;FMN1	.	.
chr15	33143767	33144037	271	33143994	15.63	10.8565	6.48941	6.94782	FTE1_peak_1734	chr15_33143767_33144037	DDX11L1;FMN1	.	.
chr15	33148814	33148946	133	33148902	13.75	9.92436	6.44967	6.13335	FTE1_peak_1735	chr15_33148814_33148946	DDX11L1;FMN1	.	.
chr15	33162451	33162652	202	33162515	16.25	13.4709	7.70304	9.27938	FTE1_peak_1736	chr15_33162451_33162652	DDX11L1;FMN1	.	.
chr15	33162768	33162977	210	33162847	19.38	17.0303	9.09854	12.5833	FTE1_peak_1737	chr15_33162768_33162977	DDX11L1;FMN1	.	.
chr15	33212297	33212478	182	33212382	23.13	22.0676	10.7731	17.2871	FTE1_peak_1738	chr15_33212297_33212478	DDX11L1;FMN1	.	.
chr15	34339827	34340026	200	34339863	13.75	7.37105	4.81751	3.84582	FTE1_peak_1739	chr15_34339827_34340026	CHRM5;DDX11L1	AVEN	.
chr15	35102621	35102802	182	35102678	11.88	5.86499	4.29271	2.57335	FTE1_peak_1740	chr15_35102621_35102802	DDX11L1	ACTC1	.
chr15	35849741	35849865	125	35849798	13.75	7.53305	4.91787	3.98652	FTE1_peak_1741	chr15_35849741_35849865	DDX11L1;LOC100507466	ATPBD4	.
chr15	36720370	36720680	311	36720597	12.5	9.07861	6.02844	5.34078	FTE1_peak_1742	chr15_36720370_36720680	DDX11L1	.	.
chr15	36882391	36882522	132	36882413	11.25	8.05487	5.47024	4.40147	FTE1_peak_1743	chr15_36882391_36882522	C15orf41;DDX11L1	.	.
chr15	37339150	37339340	191	37339207	18.13	15.8213	8.54034	11.4425	FTE1_peak_1744	chr15_37339150_37339340	DDX11L1;MEIS2	.	.
chr15	38065444	38065577	134	38065504	15.63	12.332	7.42394	8.24545	FTE1_peak_1745	chr15_38065444_38065577	DDX11L1	.	.
chr15	38226087	38226211	125	38226164	14.38	8.41215	5.12626	4.73758	FTE1_peak_1746	chr15_38226087_38226211	DDX11L1	.	TMCO5A
chr15	38690435	38690575	141	38690507	17.5	14.5754	8.22426	10.3316	FTE1_peak_1747	chr15_38690435_38690575	DDX11L1	.	.
chr15	38828512	38828944	433	38828886	14.38	11.2192	6.86574	7.25339	FTE1_peak_1748	chr15_38828512_38828944	DDX11L1;RASGRP1	.	.
chr15	39006931	39007218	288	39007099	18.13	12.6698	6.65383	8.57409	FTE1_peak_1749	chr15_39006931_39007218	DDX11L1	C15orf53	.
chr15	39050285	39050416	132	39050331	18.13	13.1878	6.95628	9.0676	FTE1_peak_1750	chr15_39050285_39050416	DDX11L1	.	.
chr15	39186481	39186887	407	39186564	14.38	11.2192	6.86574	7.25339	FTE1_peak_1751	chr15_39186481_39186887	DDX11L1	.	.
chr15	39187704	39187843	140	39187771	15.63	12.332	7.42394	8.24545	FTE1_peak_1752	chr15_39187704_39187843	DDX11L1	.	.
chr15	39288276	39288655	380	39288370	20.01	7.09102	3.50088	3.57983	FTE1_peak_1753	chr15_39288276_39288655	DDX11L1	.	.
chr15	39309135	39309269	135	39309171	11.25	8.05487	5.47024	4.40147	FTE1_peak_1754	chr15_39309135_39309269	DDX11L1	.	.
chr15	39420437	39420563	127	39420500	13.13	10.1341	6.30754	6.26448	FTE1_peak_1755	chr15_39420437_39420563	DDX11L1	.	.
chr15	39425561	39425740	180	39425633	17.5	14.6345	8.26124	10.362	FTE1_peak_1756	chr15_39425561_39425740	DDX11L1	.	.
chr15	39481287	39481424	138	39481375	16.25	13.4709	7.70304	9.27938	FTE1_peak_1757	chr15_39481287_39481424	DDX11L1	.	.
chr15	39497038	39497162	125	39497098	16.25	13.4709	7.70304	9.27938	FTE1_peak_1758	chr15_39497038_39497162	DDX11L1	.	.
chr15	39505703	39505892	190	39505782	17.5	14.6345	8.26124	10.362	FTE1_peak_1759	chr15_39505703_39505892	DDX11L1	.	.
chr15	39506146	39506289	144	39506183	11.88	5.86499	4.29271	2.57335	FTE1_peak_1760	chr15_39506146_39506289	DDX11L1	.	.
chr15	39506481	39506686	206	39506500	11.25	8.05487	5.47024	4.40147	FTE1_peak_1761	chr15_39506481_39506686	DDX11L1	.	.
chr15	39524728	39524995	268	39524928	23.76	21.0461	10.4237	16.3365	FTE1_peak_1762	chr15_39524728_39524995	DDX11L1	.	C15orf54
chr15	39531804	39532058	255	39531942	21.26	19.5105	9.93584	14.8878	FTE1_peak_1763	chr15_39531804_39532058	DDX11L1	.	C15orf54
chr15	39535316	39535546	231	39535466	11.25	8.05487	5.47024	4.40147	FTE1_peak_1764	chr15_39535316_39535546	DDX11L1	.	C15orf54
chr15	39555357	39555523	167	39555443	21.26	15.2574	7.41853	10.9537	FTE1_peak_1765	chr15_39555357_39555523	DDX11L1	C15orf54	.
chr15	39559255	39559379	125	39559297	15	12.332	7.14484	8.24545	FTE1_peak_1766	chr15_39559255_39559379	DDX11L1	C15orf54	.
chr15	39576042	39576187	146	39576123	20.63	18.2604	9.65674	13.7189	FTE1_peak_1767	chr15_39576042_39576187	DDX11L1	C15orf54	.
chr15	39593043	39593228	186	39593128	18.13	13.1878	6.95628	9.0676	FTE1_peak_1768	chr15_39593043_39593228	DDX11L1	.	.
chr15	39593990	39594145	156	39594080	18.75	9.25272	4.93873	5.50444	FTE1_peak_1769	chr15_39593990_39594145	DDX11L1	.	.
chr15	39655108	39655585	478	39655298	26.26	26.0341	12.1686	21.0394	FTE1_peak_1770	chr15_39655108_39655585	DDX11L1	.	.
chr15	39656870	39657045	176	39656954	13.75	10.1341	6.58664	6.26448	FTE1_peak_1771	chr15_39656870_39657045	DDX11L1	.	.
chr15	39657399	39657682	284	39657618	18.75	12.1886	6.58497	8.17106	FTE1_peak_1772	chr15_39657399_39657682	DDX11L1	.	.
chr15	39871782	39871914	133	39871891	20.63	9.89506	4.88823	6.10483	FTE1_peak_1773	chr15_39871782_39871914	DDX11L1	.	FSIP1;THBS1
chr15	39872075	39872229	155	39872130	26.88	15.1838	6.37304	10.894	FTE1_peak_1774	chr15_39872075_39872229	DDX11L1	.	FSIP1;THBS1
chr15	39873834	39874382	549	39874011	27.51	13.0758	5.18313	8.9636	FTE1_peak_1775	chr15_39873834_39874382	DDX11L1;THBS1	.	FSIP1
chr15	39874681	39874943	263	39874797	20.01	8.95422	4.30877	5.25601	FTE1_peak_1776	chr15_39874681_39874943	DDX11L1;THBS1	.	FSIP1
chr15	39875072	39892359	17288	39890495	67.52	57.1656	13.7035	51.1469	FTE1_peak_1777	chr15_39875072_39892359	DDX11L1;FSIP1;THBS1	.	.
chr15	40169967	40170111	145	40170081	13.75	7.21462	4.72116	3.69528	FTE1_peak_1778	chr15_40169967_40170111	DDX11L1;GPR176	.	.
chr15	40298276	40298403	128	40298315	14.38	8.41215	5.12626	4.73758	FTE1_peak_1779	chr15_40298276_40298403	DDX11L1;EIF2AK4	.	SRP14
chr15	42083463	42083587	125	42083529	11.88	8.01672	5.72361	4.40147	FTE1_peak_1780	chr15_42083463_42083587	DDX11L1;MAPKBP1	MGA	.
chr15	42210101	42210295	195	42210155	15.63	12.332	7.42394	8.24545	FTE1_peak_1781	chr15_42210101_42210295	DDX11L1;EHD4	SPTBN5	.
chr15	42236541	42236891	351	42236786	15	9.31879	5.33465	5.55219	FTE1_peak_1782	chr15_42236541_42236891	DDX11L1;EHD4	.	.
chr15	42577851	42578021	171	42577958	16.25	13.4709	7.70304	9.27938	FTE1_peak_1783	chr15_42577851_42578021	DDX11L1;GANC	TMEM87A	.
chr15	43124860	43124996	137	43124934	12.5	8.88511	5.90307	5.18948	FTE1_peak_1784	chr15_43124860_43124996	DDX11L1;TTBK2	.	.
chr15	44205680	44205807	128	44205775	13.75	10.1341	6.58664	6.26448	FTE1_peak_1785	chr15_44205680_44205807	DDX11L1;FRMD5	.	.
chr15	44394232	44394462	231	44394353	21.26	18.1022	9.08391	13.6143	FTE1_peak_1786	chr15_44394232_44394462	DDX11L1;FRMD5	.	.
chr15	45019301	45019551	251	45019368	13.75	9.36281	6.08396	5.59523	FTE1_peak_1787	chr15_45019301_45019551	DDX11L1	B2M	TRIM69
chr15	47586014	47586191	178	47586072	15.63	12.332	7.42394	8.24545	FTE1_peak_1788	chr15_47586014_47586191	DDX11L1;SEMA6D	.	.
chr15	47723699	47724007	309	47723910	14.38	10.0841	6.15151	6.26448	FTE1_peak_1789	chr15_47723699_47724007	DDX11L1;SEMA6D	.	.
chr15	47758711	47758888	178	47758796	13.75	8.64478	5.62042	4.95754	FTE1_peak_1790	chr15_47758711_47758888	DDX11L1;SEMA6D	.	.
chr15	47815952	47816106	155	47816008	14.38	11.2192	6.86574	7.25339	FTE1_peak_1791	chr15_47815952_47816106	DDX11L1;SEMA6D	.	.
chr15	48785736	48785980	245	48785877	15	12.332	7.14484	8.24545	FTE1_peak_1792	chr15_48785736_48785980	DDX11L1;FBN1	.	.
chr15	48858956	48859133	178	48859072	20.63	17.5302	9.20443	13.0583	FTE1_peak_1793	chr15_48858956_48859133	DDX11L1;FBN1	.	.
chr15	48874728	48874982	255	48874838	18.13	15.8213	8.54034	11.4425	FTE1_peak_1794	chr15_48874728_48874982	DDX11L1;FBN1	.	.
chr15	48884557	48884878	322	48884751	16.25	12.7627	7.26495	8.65829	FTE1_peak_1795	chr15_48884557_48884878	DDX11L1;FBN1	.	.
chr15	48973150	48973395	246	48973196	15.63	11.6685	7.00173	7.68431	FTE1_peak_1796	chr15_48973150_48973395	DDX11L1	.	.
chr15	48987263	48987571	309	48987375	22.51	20.7033	10.4471	16.0365	FTE1_peak_1797	chr15_48987263_48987571	DDX11L1	.	.
chr15	49428162	49428405	244	49428282	23.13	22.0676	10.7731	17.2871	FTE1_peak_1798	chr15_49428162_49428405	COPS2;DDX11L1	.	GALK2;LOC100306975
chr15	49574715	49574853	139	49574775	16.25	13.4709	7.70304	9.27938	FTE1_peak_1799	chr15_49574715_49574853	DDX11L1;GALK2	.	.
chr15	49785164	49785365	202	49785262	18.13	15.8213	8.54034	11.4425	FTE1_peak_1800	chr15_49785164_49785365	C15orf33;DDX11L1	FGF7	.
chr15	50139714	50139897	184	50139798	18.75	15.8213	8.81944	11.4425	FTE1_peak_1801	chr15_50139714_50139897	DDX11L1	.	ATP8B4
chr15	50140437	50140730	294	50140623	20.01	18.2604	9.37764	13.7189	FTE1_peak_1802	chr15_50140437_50140730	DDX11L1	.	ATP8B4
chr15	50148219	50148393	175	50148273	14.38	8.41215	5.12626	4.73758	FTE1_peak_1803	chr15_50148219_50148393	DDX11L1	.	ATP8B4
chr15	50156209	50156362	154	50156280	21.26	19.2586	9.78267	14.683	FTE1_peak_1804	chr15_50156209_50156362	ATP8B4;DDX11L1	.	.
chr15	50342135	50342304	170	50342219	15.63	12.332	7.42394	8.24545	FTE1_peak_1805	chr15_50342135_50342304	ATP8B4;DDX11L1	.	.
chr15	50429560	50429758	199	50429688	15	12.332	7.14484	8.24545	FTE1_peak_1806	chr15_50429560_50429758	DDX11L1	ATP8B4	.
chr15	51202821	51202945	125	51202883	21.88	10.2464	4.94719	6.36151	FTE1_peak_1807	chr15_51202821_51202945	AP4E1;DDX11L1	.	.
chr15	51515981	51516140	160	51516050	13.13	10.1341	6.30754	6.26448	FTE1_peak_1808	chr15_51515981_51516140	CYP19A1;DDX11L1	.	MIR4713
chr15	51787262	51787404	143	51787336	16.25	13.4709	7.70304	9.27938	FTE1_peak_1809	chr15_51787262_51787404	DDX11L1;DMXL2	.	.
chr15	51869176	51869314	139	51869240	16.88	12.1714	7.15177	8.16651	FTE1_peak_1810	chr15_51869176_51869314	DDX11L1;DMXL2	.	.
chr15	52387974	52388138	165	52388036	17.5	13.0749	7.29245	8.96276	FTE1_peak_1811	chr15_52387974_52388138	DDX11L1	MAPK6	BCL2L10;GNB5
chr15	52436241	52436481	241	52436405	16.88	13.1462	7.77367	9.03171	FTE1_peak_1812	chr15_52436241_52436481	DDX11L1;GNB5	.	.
chr15	52815547	52815704	158	52815634	15	12.332	7.14484	8.24545	FTE1_peak_1813	chr15_52815547_52815704	DDX11L1;MYO5A	.	ARPP19
chr15	56200168	56200318	151	56200235	18.75	15.8213	8.81944	11.4425	FTE1_peak_1814	chr15_56200168_56200318	DDX11L1;NEDD4	.	.
chr15	57051744	57051988	245	57051840	25.63	12.6201	5.32635	8.52686	FTE1_peak_1815	chr15_57051744_57051988	DDX11L1	ZNF280D	.
chr15	57844017	57844166	150	57844083	17.5	12.6781	7.04937	8.5809	FTE1_peak_1816	chr15_57844017_57844166	DDX11L1	CGNL1	.
chr15	58495896	58496037	142	58495932	14.38	11.2192	6.86574	7.25339	FTE1_peak_1817	chr15_58495896_58496037	DDX11L1	AQP9	.
chr15	58762010	58762483	474	58762301	27.51	26.7273	12.3275	21.7102	FTE1_peak_1818	chr15_58762010_58762483	DDX11L1;LIPC	.	.
chr15	58839626	58839906	281	58839764	30.01	25.4237	10.336	20.4783	FTE1_peak_1819	chr15_58839626_58839906	DDX11L1;LIPC	.	.
chr15	58843886	58844184	299	58844129	13.75	9.12699	5.9311	5.3857	FTE1_peak_1820	chr15_58843886_58844184	DDX11L1;LIPC	.	.
chr15	58924970	58925237	268	58925080	14.38	8.41215	5.12626	4.73758	FTE1_peak_1821	chr15_58924970_58925237	ADAM10;DDX11L1	.	.
chr15	59587189	59587328	140	59587294	13.75	9.81751	6.37994	6.02978	FTE1_peak_1822	chr15_59587189_59587328	DDX11L1;MYO1E	.	.
chr15	59588502	59588626	125	59588586	14.38	9.84345	6.00147	6.05534	FTE1_peak_1823	chr15_59588502_59588626	DDX11L1;MYO1E	.	.
chr15	60388490	60388648	159	60388552	14.38	11.2192	6.86574	7.25339	FTE1_peak_1824	chr15_60388490_60388648	DDX11L1	.	.
chr15	60638026	60638153	128	60638098	11.88	8.05487	5.74934	4.40147	FTE1_peak_1825	chr15_60638026_60638153	DDX11L1	.	ANXA2
chr15	60638254	60638384	131	60638307	16.88	10.2513	5.95981	6.36151	FTE1_peak_1826	chr15_60638254_60638384	DDX11L1	.	ANXA2
chr15	60663576	60663841	266	60663738	21.26	15.2574	7.41853	10.9537	FTE1_peak_1827	chr15_60663576_60663841	ANXA2;DDX11L1	.	.
chr15	60671915	60672201	287	60672033	18.75	15.7587	8.77997	11.4346	FTE1_peak_1828	chr15_60671915_60672201	ANXA2;DDX11L1	.	.
chr15	60682375	60682867	493	60682425	13.75	10.0335	6.52093	6.23896	FTE1_peak_1829	chr15_60682375_60682867	ANXA2;DDX11L1	.	NARG2
chr15	60683055	60683184	130	60683158	10.63	7.06535	5.19114	3.5552	FTE1_peak_1830	chr15_60683055_60683184	ANXA2;DDX11L1	.	NARG2
chr15	60685077	60685482	406	60685166	15	10.466	6.01087	6.57227	FTE1_peak_1831	chr15_60685077_60685482	ANXA2;DDX11L1	.	NARG2
chr15	60694636	60694798	163	60694703	19.38	9.89648	5.00125	6.10625	FTE1_peak_1832	chr15_60694636_60694798	DDX11L1	ANXA2	NARG2
chr15	61265114	61265284	171	61265171	10	7.06535	4.91204	3.5552	FTE1_peak_1833	chr15_61265114_61265284	DDX11L1;RORA	.	.
chr15	61675493	61675872	380	61675752	21.88	19.5105	10.2149	14.8878	FTE1_peak_1834	chr15_61675493_61675872	DDX11L1	.	.
chr15	61848283	61848495	213	61848387	21.88	19.5105	10.2149	14.8878	FTE1_peak_1835	chr15_61848283_61848495	DDX11L1	.	.
chr15	62088339	62088510	172	62088439	21.26	19.1705	9.72921	14.5967	FTE1_peak_1836	chr15_62088339_62088510	DDX11L1	.	.
chr15	63143083	63143232	150	63143157	15.63	11.2213	6.71883	7.25507	FTE1_peak_1837	chr15_63143083_63143232	DDX11L1	MIR190A;TLN2	.
chr15	63187411	63187668	258	63187476	25.01	19.6141	8.66885	14.9783	FTE1_peak_1838	chr15_63187411_63187668	DDX11L1	.	.
chr15	63188304	63188509	206	63188468	18.13	10.9244	5.66808	7.01389	FTE1_peak_1839	chr15_63188304_63188509	DDX11L1	.	.
chr15	63365418	63365803	386	63365507	15.63	9.31879	5.54303	5.55219	FTE1_peak_1840	chr15_63365418_63365803	DDX11L1	TPM1	.
chr15	63389378	63389662	285	63389544	15	11.4406	6.59956	7.46923	FTE1_peak_1841	chr15_63389378_63389662	DDX11L1	TPM1	LACTB
chr15	63400170	63400590	421	63400330	37.51	36.2232	14.0036	30.8068	FTE1_peak_1842	chr15_63400170_63400590	DDX11L1	.	LACTB
chr15	63428170	63428326	157	63428224	13.13	10.089	6.27931	6.26448	FTE1_peak_1843	chr15_63428170_63428326	DDX11L1;LACTB	.	RPS27L
chr15	63539445	63539662	218	63539538	15.63	11.6685	7.00173	7.68431	FTE1_peak_1844	chr15_63539445_63539662	DDX11L1;RAB8B	.	.
chr15	63583737	63583980	244	63583874	17.5	14.6345	8.26124	10.362	FTE1_peak_1845	chr15_63583737_63583980	APH1B;DDX11L1	RAB8B	.
chr15	65588312	65589053	742	65588544	50.64	49.1873	15.8887	43.395	FTE1_peak_1846	chr15_65588312_65589053	DDX11L1	PARP16	.
chr15	65596945	65597852	908	65597427	71.27	70.4701	17.955	63.9531	FTE1_peak_1847	chr15_65596945_65597852	DDX11L1	PARP16	IGDCC3
chr15	66748626	66748767	142	66748718	13.75	10.1341	6.58664	6.26448	FTE1_peak_1848	chr15_66748626_66748767	DDX11L1;MAP2K1	.	.
chr15	67175732	67175968	237	67175824	26.26	15.982	6.60773	11.597	FTE1_peak_1849	chr15_67175732_67175968	DDX11L1	.	.
chr15	67341185	67341398	214	67341287	23.76	17.4005	8.25208	12.9311	FTE1_peak_1850	chr15_67341185_67341398	DDX11L1	.	SMAD3
chr15	67342272	67342562	291	67342415	21.26	19.5105	9.93584	14.8878	FTE1_peak_1851	chr15_67342272_67342562	DDX11L1	.	SMAD3
chr15	67368691	67368846	156	67368725	12.5	6.99778	4.69679	3.5552	FTE1_peak_1852	chr15_67368691_67368846	DDX11L1;SMAD3	.	.
chr15	67418130	67418393	264	67418271	36.88	31.0587	11.6568	25.8595	FTE1_peak_1853	chr15_67418130_67418393	DDX11L1;SMAD3	.	.
chr15	67470977	67471105	129	67471033	16.88	10.2104	5.93508	6.33704	FTE1_peak_1854	chr15_67470977_67471105	DDX11L1;SMAD3	.	AAGAB
chr15	67493596	67493818	223	67493719	17.5	14.5754	8.22426	10.3316	FTE1_peak_1855	chr15_67493596_67493818	AAGAB;DDX11L1	SMAD3	.
chr15	68682880	68683024	145	68682968	16.88	7.66459	4.46986	4.10596	FTE1_peak_1856	chr15_68682880_68683024	DDX11L1;ITGA11	.	.
chr15	68817242	68817560	319	68817476	11.88	8.01672	5.72361	4.40147	FTE1_peak_1857	chr15_68817242_68817560	DDX11L1	.	.
chr15	68835554	68835854	301	68835761	15	12.2799	7.11286	8.24545	FTE1_peak_1858	chr15_68835554_68835854	DDX11L1	.	.
chr15	69748702	69748850	149	69748826	13.13	6.63862	4.18621	3.25149	FTE1_peak_1859	chr15_69748702_69748850	DDX11L1	KIF23;RPLP1	.
chr15	70146114	70146253	140	70146185	10.63	6.36443	4.72194	2.99461	FTE1_peak_1860	chr15_70146114_70146253	DDX11L1	C15orf50	.
chr15	70147006	70147163	158	70147154	10	6.25826	4.40105	2.89094	FTE1_peak_1861	chr15_70147006_70147163	DDX11L1	C15orf50	.
chr15	70722529	70722657	129	70722613	15	11.2754	6.49906	7.30775	FTE1_peak_1862	chr15_70722529_70722657	DDX11L1	.	.
chr15	70888800	70888939	140	70888846	10.63	7.06535	5.19114	3.5552	FTE1_peak_1863	chr15_70888800_70888939	DDX11L1	.	.
chr15	71092472	71092650	179	71092535	12.5	7.30219	4.88807	3.77964	FTE1_peak_1864	chr15_71092472_71092650	DDX11L1	.	.
chr15	71587781	71588370	590	71588026	18.13	14.6826	7.84811	10.4092	FTE1_peak_1865	chr15_71587781_71588370	DDX11L1;THSD4	.	.
chr15	71618033	71618157	125	71618149	10	7.06535	4.91204	3.5552	FTE1_peak_1866	chr15_71618033_71618157	DDX11L1;THSD4	.	.
chr15	71976336	71976511	176	71976424	16.25	13.4709	7.70304	9.27938	FTE1_peak_1867	chr15_71976336_71976511	DDX11L1;THSD4	.	.
chr15	74715419	74715555	137	74715453	19.38	12.0584	6.15248	8.06062	FTE1_peak_1868	chr15_74715419_74715555	DDX11L1;SEMA7A	.	UBL7
chr15	75463887	75464069	183	75463995	19.38	13.1909	6.79336	9.0676	FTE1_peak_1869	chr15_75463887_75464069	DDX11L1	.	.
chr15	77437217	77437367	151	77437259	20.63	14.2141	7.21014	9.98737	FTE1_peak_1870	chr15_77437217_77437367	DDX11L1;PEAK1	.	.
chr15	78357735	78358032	298	78357795	19.38	17.0303	9.09854	12.5833	FTE1_peak_1871	chr15_78357735_78358032	DDX11L1;TBC1D2B	.	SH2D7
chr15	78595153	78595280	128	78595217	20.01	12.7163	6.17801	8.61674	FTE1_peak_1872	chr15_78595153_78595280	DDX11L1	DNAJA4;WDR61	.
chr15	79198254	79198903	650	79198402	26.26	25.2916	11.7234	20.3584	FTE1_peak_1873	chr15_79198254_79198903	DDX11L1	MORF4L1	CTSH
chr15	80768453	80768597	145	80768492	14.38	8.41215	5.12626	4.73758	FTE1_peak_1874	chr15_80768453_80768597	ARNT2;DDX11L1	.	.
chr15	80772823	80773005	183	80772926	17.5	13.2526	7.40184	9.12596	FTE1_peak_1875	chr15_80772823_80773005	ARNT2;DDX11L1	.	.
chr15	80773220	80773607	388	80773454	16.25	13.4709	7.70304	9.27938	FTE1_peak_1876	chr15_80773220_80773607	ARNT2;DDX11L1	.	.
chr15	80781411	80781606	196	80781488	11.88	7.20459	5.17713	3.68656	FTE1_peak_1877	chr15_80781411_80781606	ARNT2;DDX11L1	.	.
chr15	80806004	80806128	125	80806043	13.13	9.66133	6.0121	5.8794	FTE1_peak_1878	chr15_80806004_80806128	ARNT2;DDX11L1	.	.
chr15	80841541	80841879	339	80841793	17.5	14.6345	8.26124	10.362	FTE1_peak_1879	chr15_80841541_80841879	ARNT2;DDX11L1	.	.
chr15	80842309	80842811	503	80842752	15.63	9.31879	5.54303	5.55219	FTE1_peak_1880	chr15_80842309_80842811	ARNT2;DDX11L1	.	.
chr15	81221658	81221814	157	81221715	15.63	12.1525	7.3095	8.1508	FTE1_peak_1881	chr15_81221658_81221814	DDX11L1;KIAA1199	.	.
chr15	81630983	81631332	350	81631078	35.01	38.7319	16.076	33.2373	FTE1_peak_1882	chr15_81630983_81631332	DDX11L1;TMC3	IL16;STARD5	.
chr15	84517145	84517286	142	84517197	19.38	13.1909	6.79336	9.0676	FTE1_peak_1883	chr15_84517145_84517286	ADAMTSL3;DDX11L1	.	.
chr15	85861769	85862032	264	85861867	15	11.1678	6.43374	7.24321	FTE1_peak_1884	chr15_85861769_85862032	DDX11L1	.	.
chr15	87811119	87811299	181	87811232	11.88	8.05487	5.74934	4.40147	FTE1_peak_1885	chr15_87811119_87811299	DDX11L1	.	.
chr15	87912550	87912709	160	87912644	31.26	21.4139	8.06455	16.6939	FTE1_peak_1886	chr15_87912550_87912709	DDX11L1	.	.
chr15	88114099	88114230	132	88114131	15	8.60175	4.92429	4.91809	FTE1_peak_1887	chr15_88114099_88114230	DDX11L1	.	LINC00052
chr15	88295941	88296065	125	88295995	15.63	12.332	7.42394	8.24545	FTE1_peak_1888	chr15_88295941_88296065	DDX11L1	.	.
chr15	88320306	88320439	134	88320354	15.63	9.31879	5.54303	5.55219	FTE1_peak_1889	chr15_88320306_88320439	DDX11L1	.	.
chr15	88360094	88360290	197	88360188	18.13	15.8213	8.54034	11.4425	FTE1_peak_1890	chr15_88360094_88360290	DDX11L1	.	.
chr15	89648545	89648748	204	89648665	16.88	13.4709	7.98214	9.27938	FTE1_peak_1891	chr15_89648545_89648748	ABHD2;DDX11L1	.	.
chr15	91224974	91225118	145	91225003	13.13	8.40061	5.23276	4.73541	FTE1_peak_1892	chr15_91224974_91225118	DDX11L1	.	.
chr15	92707635	92707832	198	92707734	15	12.332	7.14484	8.24545	FTE1_peak_1893	chr15_92707635_92707832	DDX11L1;SLCO3A1	.	.
chr15	93347290	93347521	232	93347410	25.01	15.5789	6.56317	11.2626	FTE1_peak_1894	chr15_93347290_93347521	DDX11L1	ASB9P1	.
chr15	95706245	95706537	293	95706498	11.25	7.83221	5.32737	4.26561	FTE1_peak_1895	chr15_95706245_95706537	DDX11L1	.	.
chr15	96103223	96103347	125	96103290	13.75	10.1341	6.58664	6.26448	FTE1_peak_1896	chr15_96103223_96103347	DDX11L1	.	.
chr15	99457961	99458115	155	99458000	15	12.332	7.14484	8.24545	FTE1_peak_1897	chr15_99457961_99458115	DDX11L1;IGF1R	.	.
chr15	100076926	100077163	238	100077024	12.5	9.07861	6.02844	5.34078	FTE1_peak_1898	chr15_100076926_100077163	DDX11L1	.	MEF2A
chr15	100083194	100083318	125	100083262	16.88	13.4709	7.98214	9.27938	FTE1_peak_1899	chr15_100083194_100083318	DDX11L1	.	MEF2A
chr15	100583478	100583643	166	100583559	17.5	14.6345	8.26124	10.362	FTE1_peak_1900	chr15_100583478_100583643	ADAMTS17;DDX11L1	.	.
chr15	100634105	100634249	145	100634188	13.75	10.1341	6.58664	6.26448	FTE1_peak_1901	chr15_100634105_100634249	ADAMTS17;DDX11L1	.	.
chr15	101261367	101261526	160	101261402	11.88	8.05487	5.74934	4.40147	FTE1_peak_1902	chr15_101261367_101261526	DDX11L1	.	.
chr15	101262226	101262401	176	101262297	14.38	10.9932	6.72296	7.07854	FTE1_peak_1903	chr15_101262226_101262401	DDX11L1	.	.
chr15	101708538	101708666	129	101708619	14.38	8.41215	5.12626	4.73758	FTE1_peak_1904	chr15_101708538_101708666	DDX11L1	.	CHSY1
chr15	102215401	102215528	128	102215466	11.88	6.66035	4.81425	3.27275	FTE1_peak_1905	chr15_102215401_102215528	DDX11L1;TARSL2	TM2D3	.
chr16	2885819	2886012	194	2885925	36.88	27.9776	10.069	22.9083	FTE1_peak_1906	chr16_2885819_2886012	.	PRSS21;ZG16B	PRSS22;PRSS30P
chr16	8772549	8772745	197	8772571	15.63	9.31879	5.54303	5.55219	FTE1_peak_1907	chr16_8772549_8772745	ABAT	.	.
chr16	11198876	11199148	273	11198943	18.13	14.6163	7.80806	10.362	FTE1_peak_1908	chr16_11198876_11199148	CLEC16A	.	.
chr16	11422505	11422685	181	11422601	24.38	14.5125	6.34535	10.2721	FTE1_peak_1909	chr16_11422505_11422685	.	.	RMI2
chr16	11877519	11877652	134	11877607	13.13	8.9461	5.56786	5.24902	FTE1_peak_1910	chr16_11877519_11877652	ZC3H7A	.	.
chr16	12252337	12252463	127	12252413	15	10.6093	6.09674	6.70697	FTE1_peak_1911	chr16_12252337_12252463	SNX29	.	.
chr16	13011568	13011716	149	13011644	19.38	14.2477	7.41094	10.0185	FTE1_peak_1912	chr16_13011568_13011716	SHISA9	.	.
chr16	13203993	13204464	472	13204332	32.51	33.994	14.729	28.665	FTE1_peak_1913	chr16_13203993_13204464	SHISA9	.	.
chr16	13401114	13401495	382	13401205	23.76	17.4005	8.25208	12.9311	FTE1_peak_1914	chr16_13401114_13401495	.	.	.
chr16	13401891	13402047	157	13401985	14.38	6.17368	3.84469	2.81294	FTE1_peak_1915	chr16_13401891_13402047	.	.	.
chr16	13410036	13410166	131	13410065	13.13	10.1341	6.30754	6.26448	FTE1_peak_1916	chr16_13410036_13410166	.	.	.
chr16	14595448	14595601	154	14595529	16.25	12.1714	6.90171	8.16651	FTE1_peak_1917	chr16_14595448_14595601	PARN	.	.
chr16	17612319	17612577	259	17612492	16.25	13.4709	7.70304	9.27938	FTE1_peak_1918	chr16_17612319_17612577	MIR3179-1;MIR3179-2;MIR3179-3;MIR3180-1;MIR3180-2;MIR3180-3	.	.
chr16	17862287	17862438	152	17862369	14.38	11.2192	6.86574	7.25339	FTE1_peak_1919	chr16_17862287_17862438	MIR3179-1;MIR3179-2;MIR3179-3;MIR3180-1;MIR3180-2;MIR3180-3	.	.
chr16	17926713	17926852	140	17926763	15	12.332	7.14484	8.24545	FTE1_peak_1920	chr16_17926713_17926852	MIR3179-1;MIR3179-2;MIR3179-3;MIR3180-1;MIR3180-2;MIR3180-3	.	.
chr16	17930939	17931171	233	17931054	18.75	15.8213	8.81944	11.4425	FTE1_peak_1921	chr16_17930939_17931171	MIR3179-1;MIR3179-2;MIR3179-3;MIR3180-1;MIR3180-2;MIR3180-3	.	.
chr16	19822664	19822946	283	19822711	11.88	8.05487	5.74934	4.40147	FTE1_peak_1922	chr16_19822664_19822946	IQCK	.	.
chr16	20922228	20922355	128	20922287	15.63	9.71651	5.78404	5.93174	FTE1_peak_1923	chr16_20922228_20922355	LYRM1	DCUN1D3	DNAH3
chr16	22309700	22309906	207	22309877	16.88	6.7721	3.9954	3.37256	FTE1_peak_1924	chr16_22309700_22309906	POLR3E	EEF2K	.
chr16	22398452	22398621	170	22398538	16.25	12.343	7.00681	8.25597	FTE1_peak_1925	chr16_22398452_22398621	.	CDR2	.
chr16	22408810	22409108	299	22408898	31.88	32.1934	14.2198	26.9313	FTE1_peak_1926	chr16_22408810_22409108	.	CDR2	RRN3P3
chr16	23434917	23435041	125	23434967	20.01	11.9918	5.79455	7.99606	FTE1_peak_1927	chr16_23434917_23435041	COG7	.	.
chr16	24657589	24658049	461	24657847	20.01	14.2141	7.00175	9.98737	FTE1_peak_1928	chr16_24657589_24658049	.	.	.
chr16	24712396	24712659	264	24712609	14.38	8.41215	5.12626	4.73758	FTE1_peak_1929	chr16_24712396_24712659	.	.	TNRC6A
chr16	24989129	24989279	151	24989163	13.13	10.1341	6.30754	6.26448	FTE1_peak_1930	chr16_24989129_24989279	ARHGAP17	.	.
chr16	24999208	24999423	216	24999314	14.38	11.2192	6.86574	7.25339	FTE1_peak_1931	chr16_24999208_24999423	ARHGAP17	.	.
chr16	25108956	25109205	250	25109091	16.88	12.825	7.56801	8.71857	FTE1_peak_1932	chr16_25108956_25109205	.	.	LCMT1
chr16	26999012	26999230	219	26999133	24.38	14.5125	6.34535	10.2721	FTE1_peak_1933	chr16_26999012_26999230	.	.	.
chr16	27275580	27275732	153	27275674	19.38	12.8082	6.57422	8.70251	FTE1_peak_1934	chr16_27275580_27275732	NSMCE1	.	FLJ21408
chr16	27773833	27773986	154	27773899	15.63	11.0621	6.61855	7.14459	FTE1_peak_1935	chr16_27773833_27773986	KIAA0556	.	GSG1L
chr16	28647951	28648078	128	28648024	16.88	13.4709	7.98214	9.27938	FTE1_peak_1936	chr16_28647951_28648078	EIF3C;EIF3CL	SULT1A1	.
chr16	47766763	47767014	252	47766868	15	11.1147	6.40158	7.19278	FTE1_peak_1937	chr16_47766763_47767014	.	.	.
chr16	48157214	48157356	143	48157297	15	9.31879	5.33465	5.55219	FTE1_peak_1938	chr16_48157214_48157356	ABCC12	.	.
chr16	48161074	48161372	299	48161156	21.88	19.5105	10.2149	14.8878	FTE1_peak_1939	chr16_48161074_48161372	ABCC12	.	.
chr16	53204436	53204575	140	53204522	16.88	12.888	7.60827	8.78004	FTE1_peak_1940	chr16_53204436_53204575	CHD9	.	.
chr16	53291004	53291177	174	53291081	18.75	15.8213	8.81944	11.4425	FTE1_peak_1941	chr16_53291004_53291177	CHD9	.	.
chr16	53802608	53802780	173	53802657	19.38	6.46191	3.39668	3.08591	FTE1_peak_1942	chr16_53802608_53802780	FTO	.	.
chr16	53810089	53810241	153	53810172	16.88	13.4709	7.98214	9.27938	FTE1_peak_1943	chr16_53810089_53810241	FTO	.	.
chr16	53855967	53856105	139	53856007	13.75	9.50985	6.17952	5.73726	FTE1_peak_1944	chr16_53855967_53856105	FTO	.	.
chr16	54060956	54061284	329	54061192	22.51	20.7799	10.494	16.0826	FTE1_peak_1945	chr16_54060956_54061284	FTO	.	.
chr16	54407408	54407698	291	54407500	17.5	13.2526	7.40184	9.12596	FTE1_peak_1946	chr16_54407408_54407698	.	.	.
chr16	54480620	54480744	125	54480696	17.5	11.2084	6.1682	7.25339	FTE1_peak_1947	chr16_54480620_54480744	.	.	.
chr16	54496337	54496645	309	54496481	15	6.9063	4.00098	3.49389	FTE1_peak_1948	chr16_54496337_54496645	.	.	.
chr16	55534027	55534163	137	55534088	15.63	6.9063	4.15728	3.49389	FTE1_peak_1949	chr16_55534027_55534163	MMP2	.	LPCAT2
chr16	56641288	56641419	132	56641341	15.63	8.34011	4.96391	4.67594	FTE1_peak_1950	chr16_56641288_56641419	.	MT3	MT1E;MT1JP;MT1L;MT1M;MT2A
chr16	56643676	56643905	230	56643785	21.88	13.461	6.60816	9.27938	FTE1_peak_1951	chr16_56643676_56643905	.	MT2A;MT3	MT1A;MT1E;MT1JP;MT1L;MT1M
chr16	56644307	56644451	145	56644331	16.25	5.94584	3.45085	2.64709	FTE1_peak_1952	chr16_56644307_56644451	.	MT2A;MT3	MT1A;MT1E;MT1JP;MT1L;MT1M
chr16	56998843	56999064	222	56998965	33.13	25.326	9.41619	20.3922	FTE1_peak_1953	chr16_56998843_56999064	CETP	HERPUD1	.
chr16	57927971	57928151	181	57928054	15	9.31879	5.33465	5.55219	FTE1_peak_1954	chr16_57927971_57928151	CNGB1	.	.
chr16	64474458	64474672	215	64474626	13.13	10.1341	6.30754	6.26448	FTE1_peak_1955	chr16_64474458_64474672	.	.	.
chr16	66416231	66416494	264	66416471	14.38	10.2338	6.24519	6.35963	FTE1_peak_1956	chr16_66416231_66416494	CDH5	.	LOC100505865
chr16	66652636	66652797	162	66652703	21.26	15.2574	7.41853	10.9537	FTE1_peak_1957	chr16_66652636_66652797	CMTM4	CMTM3	.
chr16	67840567	67840712	146	67840621	40.64	10.0828	3.14231	6.26448	FTE1_peak_1958	chr16_67840567_67840712	.	RANBP10	CENPT;TSNAXIP1
chr16	68098849	68099322	474	68099085	35.01	31.578	12.0031	26.3283	FTE1_peak_1959	chr16_68098849_68099322	DUS2L	.	NFATC3
chr16	69233479	69233669	191	69233573	11.88	5.86499	4.29271	2.57335	FTE1_peak_1960	chr16_69233479_69233669	SNTB2	.	.
chr16	69251436	69251580	145	69251510	15.63	9.31879	5.54303	5.55219	FTE1_peak_1961	chr16_69251436_69251580	SNTB2	.	.
chr16	69511166	69511311	146	69511234	18.75	12.9759	7.05533	8.86559	FTE1_peak_1962	chr16_69511166_69511311	.	CYB5B	.
chr16	70438326	70438472	147	70438433	16.88	9.00183	5.22027	5.30228	FTE1_peak_1963	chr16_70438326_70438472	ST3GAL2	.	.
chr16	70462055	70462200	146	70462085	16.88	10.2513	5.95981	6.36151	FTE1_peak_1964	chr16_70462055_70462200	ST3GAL2	.	FUK
chr16	70587648	70587845	198	70587769	15.63	10.6093	6.3349	6.70697	FTE1_peak_1965	chr16_70587648_70587845	SF3B3	SNORD111;SNORD111B	IL34
chr16	70607274	70607398	125	70607373	13.75	10.1341	6.58664	6.26448	FTE1_peak_1966	chr16_70607274_70607398	SF3B3	.	IL34
chr16	70607508	70607649	142	70607581	22.51	20.7033	10.4471	16.0365	FTE1_peak_1967	chr16_70607508_70607649	SF3B3	.	IL34
chr16	70839807	70839957	151	70839906	15	10.466	6.01087	6.57227	FTE1_peak_1968	chr16_70839807_70839957	.	VAC14	HYDIN
chr16	72325383	72325625	243	72325530	16.88	13.4709	7.98214	9.27938	FTE1_peak_1969	chr16_72325383_72325625	.	.	.
chr16	72911361	72911618	258	72911504	28.76	28.7582	13.285	23.6384	FTE1_peak_1970	chr16_72911361_72911618	ZFHX3	.	.
chr16	74970827	74971194	368	74970918	23.13	13.5895	6.03277	9.39325	FTE1_peak_1971	chr16_74970827_74971194	WDR59	.	.
chr16	75063893	75064123	231	75063993	45.01	48.7318	17.5283	42.9561	FTE1_peak_1972	chr16_75063893_75064123	ZNRF1	.	.
chr16	75339515	75339701	187	75339591	16.25	13.4709	7.70304	9.27938	FTE1_peak_1973	chr16_75339515_75339701	CFDP1	.	.
chr16	75385171	75385407	237	75385273	18.75	10.201	5.44963	6.32784	FTE1_peak_1974	chr16_75385171_75385407	CFDP1	.	.
chr16	77322025	77322379	355	77322118	13.13	10.1341	6.30754	6.26448	FTE1_peak_1975	chr16_77322025_77322379	ADAMTS18	.	.
chr16	77332674	77332820	147	77332715	18.13	10.9244	5.66808	7.01389	FTE1_peak_1976	chr16_77332674_77332820	ADAMTS18	.	.
chr16	77630310	77630447	138	77630353	18.13	15.8213	8.54034	11.4425	FTE1_peak_1977	chr16_77630310_77630447	.	.	.
chr16	77868527	77868652	126	77868629	15	9.31879	5.33465	5.55219	FTE1_peak_1978	chr16_77868527_77868652	VAT1L	.	.
chr16	77911693	77911931	239	77911773	21.88	15.2574	7.62691	10.9537	FTE1_peak_1979	chr16_77911693_77911931	VAT1L	.	.
chr16	80208439	80208593	155	80208552	16.25	13.4709	7.70304	9.27938	FTE1_peak_1980	chr16_80208439_80208593	.	.	.
chr16	80231695	80231939	245	80231810	16.25	10.2513	5.75142	6.36151	FTE1_peak_1981	chr16_80231695_80231939	.	.	.
chr16	82672151	82672289	139	82672222	15	9.31879	5.33465	5.55219	FTE1_peak_1982	chr16_82672151_82672289	CDH13	.	.
chr16	82794943	82795105	163	82795015	13.13	10.1341	6.30754	6.26448	FTE1_peak_1983	chr16_82794943_82795105	CDH13	.	.
chr16	82971026	82971156	131	82971056	21.26	9.46042	4.45112	5.68968	FTE1_peak_1984	chr16_82971026_82971156	CDH13	.	.
chr16	82979420	82979638	219	82979477	13.13	10.1341	6.30754	6.26448	FTE1_peak_1985	chr16_82979420_82979638	CDH13	.	.
chr16	83377717	83377931	215	83377830	16.25	13.4709	7.70304	9.27938	FTE1_peak_1986	chr16_83377717_83377931	CDH13	.	.
chr16	83437475	83437725	251	83437563	18.75	15.8213	8.81944	11.4425	FTE1_peak_1987	chr16_83437475_83437725	CDH13	.	.
chr16	84721517	84721645	129	84721584	21.26	16.4297	8.09294	12.024	FTE1_peak_1988	chr16_84721517_84721645	.	KLHL36	USP10
chr16	84873699	84873849	151	84873734	15	6.9063	4.00098	3.49389	FTE1_peak_1989	chr16_84873699_84873849	CRISPLD2	.	.
chr16	85039252	85039407	156	85039344	13.75	9.12699	5.9311	5.3857	FTE1_peak_1990	chr16_85039252_85039407	ZDHHC7	.	KIAA0513
chr16	86253863	86254079	217	86253973	21.26	15.0421	7.29691	10.7564	FTE1_peak_1991	chr16_86253863_86254079	.	.	.
chr16	86642757	86643079	323	86642915	22.51	16.3197	7.8353	11.9212	FTE1_peak_1992	chr16_86642757_86643079	.	FOXL1	.
chr16	86698204	86698433	230	86698316	21.88	15.8223	7.95852	11.4425	FTE1_peak_1993	chr16_86698204_86698433	.	.	.
chr16	86806209	86806412	204	86806377	18.13	5.85335	3.18829	2.57335	FTE1_peak_1994	chr16_86806209_86806412	.	.	.
chr16	86985592	86985847	256	86985755	15.63	8.4043	5.00123	4.73758	FTE1_peak_1995	chr16_86985592_86985847	.	.	.
chr16	88340894	88341101	208	88340990	23.13	16.3828	7.4825	11.9825	FTE1_peak_1996	chr16_88340894_88341101	.	.	.
chr16	88365751	88365942	192	88365871	23.13	9.09299	4.02185	5.35222	FTE1_peak_1997	chr16_88365751_88365942	.	.	.
chr17	597502	597737	236	597615	20.63	14.2141	7.21014	9.98737	FTE1_peak_1998	chr17_597502_597737	VPS53	.	.
chr17	831250	831380	131	831297	23.13	15.4243	6.96926	11.115	FTE1_peak_1999	chr17_831250_831380	NXN	.	.
[truncated: 3,688 more rows]

## Sheet: 4. FTE2
chr	start	end	length	abs_summit	pileup	-lg10(pvalue)	fold_enrichment	-lg10(qvalue)	name	coordinate	thislocation	upsteam	dnstream
chr1	1617691	1617810	120	1617779	24.4	14.9227	6.55608	10.5034	FTE2_peak_1	chr1_1617691_1617810	CDK11B;MMP23A;SLC35E2B	.	CDK11A
chr1	1672486	1672615	130	1672556	17.75	12.5928	7.08979	8.35945	FTE2_peak_2	chr1_1672486_1672615	SLC35E2	CDK11A;CDK11B	NADK
chr1	7361096	7361332	237	7361235	13.31	8.69513	5.48341	4.8344	FTE2_peak_3	chr1_7361096_7361332	CAMTA1	.	.
chr1	8065227	8065452	226	8065327	23.67	17.619	8.34696	12.9749	FTE2_peak_4	chr1_8065227_8065452	.	PARK7	ERRFI1
chr1	8068187	8068364	178	8068268	11.09	7.18136	4.84693	3.58896	FTE2_peak_5	chr1_8068187_8068364	.	PARK7	ERRFI1
chr1	8071611	8071725	115	8071651	12.57	9.5096	6.33996	5.56248	FTE2_peak_6	chr1_8071611_8071725	.	PARK7	ERRFI1
chr1	8077101	8077304	204	8077195	11.09	8.44993	5.64904	4.59841	FTE2_peak_7	chr1_8077101_8077304	ERRFI1	.	.
chr1	8079760	8079965	206	8079872	14.05	11.7222	7.03088	7.52556	FTE2_peak_8	chr1_8079760_8079965	ERRFI1	.	.
chr1	8107968	8108286	319	8107979	14.05	8.41215	5.01708	4.59841	FTE2_peak_9	chr1_8107968_8108286	.	ERRFI1	.
chr1	8121476	8121609	134	8121522	19.23	14.3624	7.42313	9.96586	FTE2_peak_10	chr1_8121476_8121609	.	.	.
chr1	8138306	8138515	210	8138439	13.31	10.6011	6.68542	6.55065	FTE2_peak_11	chr1_8138306_8138515	.	.	.
chr1	8156182	8156365	184	8156337	8.87	5.48854	4.61266	2.08579	FTE2_peak_12	chr1_8156182_8156365	.	.	.
chr1	8180851	8181133	283	8180922	18.49	14.1514	7.66961	9.76823	FTE2_peak_13	chr1_8180851_8181133	.	.	.
chr1	8194321	8194480	160	8194391	15.53	11.385	6.78167	7.28901	FTE2_peak_14	chr1_8194321_8194480	.	.	.
chr1	8197804	8198206	403	8197955	26.62	24.4724	11.3864	19.3868	FTE2_peak_15	chr1_8197804_8198206	.	.	.
chr1	8433597	8433760	164	8433690	11.09	8.44993	5.64904	4.59841	FTE2_peak_16	chr1_8433597_8433760	RERE	SLC45A1	.
chr1	8457027	8457251	225	8457141	13.31	10.6011	6.68542	6.55065	FTE2_peak_17	chr1_8457027_8457251	RERE	.	.
chr1	8686369	8686877	509	8686732	34.02	38.4942	16.3583	32.8823	FTE2_peak_18	chr1_8686369_8686877	RERE	.	.
chr1	8918316	8918515	200	8918502	11.09	5.86499	4.03103	2.42626	FTE2_peak_19	chr1_8918316_8918515	.	.	ENO1;ENO1-AS1
chr1	10588516	10588657	142	10588591	14.79	10.4318	6.53998	6.43792	FTE2_peak_20	chr1_10588516_10588657	PEX14	.	.
chr1	11218861	11219011	151	11218933	14.79	8.41215	5.2636	4.59841	FTE2_peak_21	chr1_11218861_11219011	MTOR	.	.
chr1	11968176	11968903	728	11968606	43.63	32.8234	10.2959	27.4151	FTE2_peak_22	chr1_11968176_11968903	.	.	KIAA2013;PLOD1
chr1	11969703	11969985	283	11969890	25.14	20.6213	9.28092	15.7507	FTE2_peak_23	chr1_11969703_11969985	.	.	KIAA2013;PLOD1
chr1	12696701	12696864	164	12696739	17.75	14.1014	8.03297	9.71859	FTE2_peak_24	chr1_12696701_12696864	.	DHRS3	AADACL4
chr1	16702167	16702473	307	16702228	25.88	21.2404	9.90746	16.3483	FTE2_peak_25	chr1_16702167_16702473	C1orf144	FBXO42	SPATA21
chr1	16839871	16840828	958	16840579	74.69	53.6034	10.8134	47.4746	FTE2_peak_26	chr1_16839871_16840828	.	CROCCP3	.
chr1	16893179	16893307	129	16893199	17.01	6.60524	3.60188	3.05596	FTE2_peak_27	chr1_16893179_16893307	MIR3675;NBPF1	.	.
chr1	17222588	17222860	273	17222696	59.9	78.9763	28.4494	71.8206	FTE2_peak_28	chr1_17222588_17222860	.	.	CROCC
chr1	17222953	17223665	713	17223063	62.86	84.1822	29.8313	76.6155	FTE2_peak_29	chr1_17222953_17223665	.	.	CROCC
chr1	17231920	17232105	186	17231995	36.24	23.7565	7.95672	18.7094	FTE2_peak_30	chr1_17231920_17232105	.	.	CROCC
chr1	17454935	17455203	269	17455073	24.4	17.6153	7.97639	12.9715	FTE2_peak_31	chr1_17454935_17455203	.	PADI2	.
chr1	17495091	17495247	157	17495158	20.71	18.0882	9.58371	13.3653	FTE2_peak_32	chr1_17495091_17495247	.	.	.
chr1	18095455	18095615	161	18095588	9.61	6.43625	4.95812	2.89558	FTE2_peak_33	chr1_18095455_18095615	ACTL8	.	.
chr1	18201097	18201500	404	18201230	10.35	7.42451	5.30358	3.76232	FTE2_peak_34	chr1_18201097_18201500	.	.	.
chr1	19336410	19336617	208	19336550	22.93	14.6084	7.00607	10.1988	FTE2_peak_35	chr1_19336410_19336617	.	.	.
chr1	19763219	19763340	122	19763320	9.61	6.43625	4.95812	2.89558	FTE2_peak_36	chr1_19763219_19763340	CAPZB	.	.
chr1	20084963	20085095	133	20085030	17.75	13.5021	7.65576	9.17909	FTE2_peak_37	chr1_20084963_20085095	TMCO4	.	.
chr1	20190443	20190655	213	20190475	13.31	10.6011	6.68542	6.55065	FTE2_peak_38	chr1_20190443_20190655	.	.	OTUD3
chr1	20927971	20928322	352	20928221	31.06	33.0555	14.3738	27.637	FTE2_peak_39	chr1_20927971_20928322	CDA	.	.
chr1	20930904	20931060	157	20930963	16.27	7.66459	4.31747	3.98035	FTE2_peak_40	chr1_20930904_20931060	CDA	.	PINK1
chr1	21223413	21223655	243	21223592	13.31	10.2292	6.44962	6.24989	FTE2_peak_41	chr1_21223413_21223655	EIF4G3	.	.
chr1	21651154	21651374	221	21651260	22.93	16.368	8.00325	11.8075	FTE2_peak_42	chr1_21651154_21651374	ECE1	LOC100506801	.
chr1	21651500	21651636	137	21651579	16.27	10.401	5.84429	6.40788	FTE2_peak_43	chr1_21651500_21651636	ECE1	LOC100506801	.
chr1	21777772	21778131	360	21777885	15.53	12.871	7.7218	8.58244	FTE2_peak_44	chr1_21777772_21778131	NBPF3	.	.
chr1	23426886	23427031	146	23426930	17.01	15.2456	8.41272	10.7426	FTE2_peak_45	chr1_23426886_23427031	LUZP1	KDM1A	.
chr1	23523530	23523650	121	23523599	17.75	11.9286	6.68293	7.72406	FTE2_peak_46	chr1_23523530_23523650	.	HTR1D;LUZP1	.
chr1	23525045	23525189	145	23525108	15.53	9.10814	5.38447	5.23063	FTE2_peak_47	chr1_23525045_23525189	.	HTR1D;LUZP1	.
chr1	23882818	23884361	1544	23883912	41.41	29.9099	9.48228	24.598	FTE2_peak_48	chr1_23882818_23884361	.	E2F2	ID3
chr1	23903844	23903990	147	23903846	14.05	8.41215	5.01708	4.59841	FTE2_peak_49	chr1_23903844_23903990	.	ID3	.
chr1	24592955	24593229	275	24593043	17.75	15.2456	8.75818	10.7426	FTE2_peak_50	chr1_24592955_24593229	.	.	.
chr1	25039769	25039967	199	25039834	12.57	7.64627	5.13223	3.96446	FTE2_peak_51	chr1_25039769_25039967	.	.	.
chr1	25120191	25120320	130	25120266	13.31	9.58603	6.04252	5.63516	FTE2_peak_52	chr1_25120191_25120320	CLIC4	.	.
chr1	26324536	26324811	276	26324602	25.88	12.6201	5.37678	8.38547	FTE2_peak_53	chr1_26324536_26324811	PAFAH2	.	EXTL1
chr1	27032281	27032532	252	27032465	15.53	11.2342	6.68703	7.14385	FTE2_peak_54	chr1_27032281_27032532	ARID1A	.	.
chr1	28834754	28835482	729	28835235	16.27	7.66459	4.31747	3.98035	FTE2_peak_55	chr1_28834754_28835482	RCC1;SNHG3	PHACTR4	.
chr1	28836438	28837012	575	28836623	26.62	20.9297	9.31179	16.0462	FTE2_peak_56	chr1_28836438_28837012	RCC1;SNHG3	PHACTR4	.
chr1	28837116	28837594	479	28837158	17.01	10.9681	5.86626	6.90653	FTE2_peak_57	chr1_28837116_28837594	RCC1;SNHG3	PHACTR4	.
chr1	28975092	28975836	745	28975325	79.87	91.5851	24.8526	82.5354	FTE2_peak_58	chr1_28975092_28975836	RNU11	TAF12	GMEB1
chr1	31870347	31870541	195	31870389	14.05	9.26464	5.5234	5.37933	FTE2_peak_59	chr1_31870347_31870541	.	FABP3	SERINC2
chr1	31870729	31870883	155	31870805	14.05	6.17368	3.76281	2.71417	FTE2_peak_60	chr1_31870729_31870883	.	FABP3	SERINC2
chr1	31873335	31873573	239	31873484	15.53	11.7527	7.01329	7.55465	FTE2_peak_61	chr1_31873335_31873573	.	FABP3	SERINC2
chr1	31956382	31956500	119	31956448	16.27	14.046	8.06726	9.66458	FTE2_peak_62	chr1_31956382_31956500	.	.	LOC149086;LOC284551
chr1	32532336	32532489	154	32532380	14.79	10.1038	6.32897	6.12882	FTE2_peak_63	chr1_32532336_32532489	.	KHDRBS1	TMEM39B
chr1	33899543	33899756	214	33899602	16.27	8.78966	4.9244	4.92604	FTE2_peak_64	chr1_33899543_33899756	.	.	.
chr1	35513192	35513454	263	35513282	16.27	13.0287	7.4359	8.73674	FTE2_peak_65	chr1_35513192_35513454	.	ZMYM6	.
chr1	36818198	36818373	176	36818284	17.01	6.60524	3.60188	3.05596	FTE2_peak_66	chr1_36818198_36818373	STK40	FAM176B	.
chr1	36852165	36852311	147	36852238	18.49	13.2963	7.15174	8.98132	FTE2_peak_67	chr1_36852165_36852311	.	STK40	LSM10
chr1	38000153	38000331	179	38000220	15.53	9.31879	5.51011	5.42449	FTE2_peak_68	chr1_38000153_38000331	SNIP1	MEAF6	DNALI1
chr1	39201334	39201558	225	39201488	11.83	8.44993	5.9945	4.59841	FTE2_peak_69	chr1_39201334_39201558	.	.	.
chr1	39201752	39201878	127	39201795	11.09	5.86499	4.03103	2.42626	FTE2_peak_70	chr1_39201752_39201878	.	.	.
chr1	39662477	39662591	115	39662533	10.35	7.42451	5.30358	3.76232	FTE2_peak_71	chr1_39662477_39662591	MACF1	.	.
chr1	39864307	39864585	279	39864366	14.79	11.5535	7.26682	7.45249	FTE2_peak_72	chr1_39864307_39864585	MACF1	.	KIAA0754
chr1	40525272	40525457	186	40525362	15.53	12.871	7.7218	8.58244	FTE2_peak_73	chr1_40525272_40525457	CAP1	.	PPT1
chr1	41341507	41341643	137	41341601	16.27	12.738	7.25625	8.495	FTE2_peak_74	chr1_41341507_41341643	.	CITED4	.
chr1	42095325	42095497	173	42095392	20.71	10.9285	5.42678	6.86854	FTE2_peak_75	chr1_42095325_42095497	HIVEP3	.	.
chr1	42367813	42368017	205	42367927	22.93	20.6768	10.6171	15.804	FTE2_peak_76	chr1_42367813_42368017	HIVEP3	.	.
chr1	42421322	42421491	170	42421384	14.05	11.6732	7.00058	7.52556	FTE2_peak_77	chr1_42421322_42421491	HIVEP3	.	.
chr1	42643357	42643471	115	42643422	11.09	8.44993	5.64904	4.59841	FTE2_peak_78	chr1_42643357_42643471	FOXJ3	GUCA2A;GUCA2B	.
chr1	42687984	42688216	233	42688052	19.23	17.7137	9.4491	13.001	FTE2_peak_79	chr1_42687984_42688216	FOXJ3	.	.
chr1	43402926	43403103	178	43403069	12.57	7.09019	4.77893	3.50544	FTE2_peak_80	chr1_43402926_43403103	SLC2A1	.	FLJ32224
chr1	43406763	43406877	115	43406818	14.05	10.1038	6.03257	6.12882	FTE2_peak_81	chr1_43406763_43406877	SLC2A1	.	FLJ32224
chr1	43407097	43407220	124	43407182	13.31	9.09943	5.73616	5.22244	FTE2_peak_82	chr1_43407097_43407220	SLC2A1	.	FLJ32224
chr1	43407633	43407779	147	43407736	8.87	5.48854	4.61266	2.08579	FTE2_peak_83	chr1_43407633_43407779	SLC2A1	.	FLJ32224
chr1	43672393	43672757	365	43672653	21.45	19.837	10.2216	15.0165	FTE2_peak_84	chr1_43672393_43672757	WDR65	.	.
chr1	43673034	43673152	119	43673050	8.87	5.22714	4.42702	2.02523	FTE2_peak_85	chr1_43673034_43673152	WDR65	.	.
chr1	44300838	44301040	203	44300974	23.67	22.8954	11.5219	17.8823	FTE2_peak_86	chr1_44300838_44301040	ST3GAL3	.	.
chr1	44333784	44333906	123	44333848	12.57	9.5096	6.33996	5.56248	FTE2_peak_87	chr1_44333784_44333906	ST3GAL3	.	.
chr1	44793672	44793801	130	44793689	11.83	5.86499	4.27754	2.42626	FTE2_peak_88	chr1_44793672_44793801	ERI3	.	.
chr1	44951491	44951605	115	44951495	9.61	6.17866	4.78324	2.7182	FTE2_peak_89	chr1_44951491_44951605	RNF220	.	.
chr1	45186907	45187574	668	45187106	58.42	47.3712	12.3043	41.4518	FTE2_peak_90	chr1_45186907_45187574	C1orf228	.	KIF2C
chr1	45195877	45196956	1080	45196387	51.77	33.9151	8.87599	28.4752	FTE2_peak_91	chr1_45195877_45196956	.	C1orf228	KIF2C
chr1	45285068	45285213	146	45285200	15.53	6.9063	4.13258	3.33144	FTE2_peak_92	chr1_45285068_45285213	.	BTBD19;PLK3;TCTEX1D4	PTCH2
chr1	45285301	45285678	378	45285471	34.76	24.1015	8.71093	19.0484	FTE2_peak_93	chr1_45285301_45285678	PTCH2	BTBD19;PLK3;TCTEX1D4	.
chr1	45712557	45712746	190	45712645	18.49	14.0948	7.63506	9.71257	FTE2_peak_94	chr1_45712557_45712746	.	.	.
chr1	45738629	45738784	156	45738732	16.27	13.9901	8.0325	9.64637	FTE2_peak_95	chr1_45738629_45738784	.	.	.
chr1	46188668	46188799	132	46188718	14.79	11.6732	7.34455	7.52556	FTE2_peak_96	chr1_46188668_46188799	IPP	TMEM69	.
chr1	46337884	46338027	144	46337995	20.71	15.4496	7.96591	10.9354	FTE2_peak_97	chr1_46337884_46338027	MAST2	.	.
chr1	48667728	48667892	165	48667810	11.09	5.86499	4.03103	2.42626	FTE2_peak_98	chr1_48667728_48667892	.	SKINTL	SLC5A9
chr1	52108576	52108839	264	52108638	14.05	11.2651	6.74793	7.17335	FTE2_peak_99	chr1_52108576_52108839	OSBPL9	.	.
chr1	52363388	52363604	217	52363499	32.54	32.904	14.0923	27.4893	FTE2_peak_100	chr1_52363388_52363604	.	NRD1	RAB3B
chr1	52363956	52364173	218	52363996	14.79	11.6732	7.34455	7.52556	FTE2_peak_101	chr1_52363956_52364173	.	NRD1	RAB3B
chr1	53712487	53712632	146	53712548	18.49	16.4686	9.10364	11.8693	FTE2_peak_102	chr1_53712487_53712632	LRP8	C1orf123;LOC100507564;MAGOH	.
chr1	54198733	54198939	207	54198870	17.01	10.5924	5.65445	6.55065	FTE2_peak_103	chr1_54198733_54198939	GLIS1	.	.
chr1	55776895	55777054	160	55776989	17.01	10.5924	5.65445	6.55065	FTE2_peak_104	chr1_55776895_55777054	.	.	.
chr1	55909294	55909564	271	55909382	15.53	6.9063	4.13258	3.33144	FTE2_peak_105	chr1_55909294_55909564	.	.	.
chr1	56184710	56184867	158	56184784	14.79	11.7222	7.37634	7.52556	FTE2_peak_106	chr1_56184710_56184867	.	.	.
chr1	57298077	57298231	155	57298168	17.01	8.44714	4.50235	4.59841	FTE2_peak_107	chr1_57298077_57298231	.	C1orf168	C8A
chr1	57955424	57955562	139	57955496	11.83	8.44993	5.9945	4.59841	FTE2_peak_108	chr1_57955424_57955562	DAB1	.	.
chr1	59058324	59058494	171	59058402	17.75	15.2456	8.75818	10.7426	FTE2_peak_109	chr1_59058324_59058494	.	TACSTD2	.
chr1	59094590	59094803	214	59094757	14.05	11.6732	7.00058	7.52556	FTE2_peak_110	chr1_59094590_59094803	.	.	MYSM1
chr1	59221265	59221439	175	59221377	11.09	8.44993	5.64904	4.59841	FTE2_peak_111	chr1_59221265_59221439	.	.	JUN;LOC100131060
chr1	59228965	59229099	135	59229040	17.75	15.1862	8.72044	10.7426	FTE2_peak_112	chr1_59228965_59229099	.	.	JUN;LOC100131060
chr1	59314526	59314671	146	59314568	19.97	13.1909	6.98919	8.88208	FTE2_peak_113	chr1_59314526_59314671	LOC100131060	.	.
chr1	59347323	59347575	253	59347401	11.83	8.44993	5.9945	4.59841	FTE2_peak_114	chr1_59347323_59347575	LOC100131060	.	.
chr1	59374986	59375100	115	59375063	11.09	8.44993	5.64904	4.59841	FTE2_peak_115	chr1_59374986_59375100	.	LOC100131060	.
chr1	59833556	59833716	161	59833645	16.27	14.046	8.06726	9.66458	FTE2_peak_116	chr1_59833556_59833716	FGGY	.	.
chr1	60144652	60144797	146	60144751	17.01	15.2456	8.41272	10.7426	FTE2_peak_117	chr1_60144652_60144797	FGGY	.	.
chr1	60196672	60196786	115	60196706	15.53	9.31879	5.51011	5.42449	FTE2_peak_118	chr1_60196672_60196786	FGGY	.	MIR4711
chr1	60637527	60637696	170	60637632	21.45	15.2574	7.48222	10.7466	FTE2_peak_119	chr1_60637527_60637696	.	.	.
chr1	61039527	61039641	115	61039609	13.31	7.53305	4.77057	3.8596	FTE2_peak_120	chr1_61039527_61039641	.	.	.
chr1	61753444	61753588	145	61753525	14.05	11.7222	7.03088	7.52556	FTE2_peak_121	chr1_61753444_61753588	NFIA	.	.
chr1	61803755	61803998	244	61803776	11.09	8.44993	5.64904	4.59841	FTE2_peak_122	chr1_61803755_61803998	NFIA	.	.
chr1	62082069	62082200	132	62082147	17.01	15.2456	8.41272	10.7426	FTE2_peak_123	chr1_62082069_62082200	.	.	.
chr1	63079704	63079835	132	63079785	13.31	10.6011	6.68542	6.55065	FTE2_peak_124	chr1_63079704_63079835	DOCK7	ANGPTL3	.
chr1	64386255	64386569	315	64386361	19.97	17.7137	9.79456	13.001	FTE2_peak_125	chr1_64386255_64386569	ROR1	.	.
chr1	64689043	64689390	348	64689077	16.27	14.046	8.06726	9.66458	FTE2_peak_126	chr1_64689043_64689390	UBE2U	.	.
chr1	65363860	65364087	228	65363955	10.35	7.42451	5.30358	3.76232	FTE2_peak_127	chr1_65363860_65364087	JAK1	.	.
chr1	65399590	65399722	133	65399649	11.09	8.44993	5.64904	4.59841	FTE2_peak_128	chr1_65399590_65399722	JAK1	.	.
chr1	65891492	65891843	352	65891592	22.93	21.5715	11.1764	16.6194	FTE2_peak_129	chr1_65891492_65891843	LEPR;LEPROT	DNAJC6	.
chr1	66286772	66286947	176	66286871	11.83	8.27115	5.8744	4.55397	FTE2_peak_130	chr1_66286772_66286947	PDE4B	.	.
chr1	67029976	67030224	249	67030123	14.79	11.7222	7.37634	7.52556	FTE2_peak_131	chr1_67029976_67030224	SGIP1	.	.
chr1	67526535	67526736	202	67526647	20.71	18.9798	10.14	14.1948	FTE2_peak_132	chr1_67526535_67526736	.	SLC35D1	.
chr1	68214140	68214257	118	68214210	11.83	8.44993	5.9945	4.59841	FTE2_peak_133	chr1_68214140_68214257	GNG12	.	.
chr1	68225489	68225606	118	68225539	14.05	11.7222	7.03088	7.52556	FTE2_peak_134	chr1_68225489_68225606	GNG12	.	.
chr1	68257856	68258125	270	68257930	15.53	11.1359	6.62538	7.06241	FTE2_peak_135	chr1_68257856_68258125	GNG12	.	.
chr1	68355657	68355799	143	68355753	11.83	8.44993	5.9945	4.59841	FTE2_peak_136	chr1_68355657_68355799	LOC100289178	.	.
chr1	68639880	68640066	187	68639971	14.05	11.7222	7.03088	7.52556	FTE2_peak_137	chr1_68639880_68640066	LOC100289178;WLS	.	MIR1262
chr1	70448744	70448908	165	70448828	16.27	14.046	8.06726	9.66458	FTE2_peak_138	chr1_70448744_70448908	LRRC7	.	.
chr1	71245179	71245542	364	71245494	14.79	8.41215	5.2636	4.59841	FTE2_peak_139	chr1_71245179_71245542	.	.	.
chr1	71479788	71480032	245	71479945	11.09	8.44993	5.64904	4.59841	FTE2_peak_140	chr1_71479788_71480032	PTGER3	.	.
chr1	71551938	71552136	199	71552072	10.35	7.42451	5.30358	3.76232	FTE2_peak_141	chr1_71551938_71552136	ZRANB2-AS2	MIR186;ZRANB2;ZRANB2-AS1	.
chr1	71764374	71764562	189	71764476	9.61	6.43625	4.95812	2.89558	FTE2_peak_142	chr1_71764374_71764562	.	.	.
chr1	72750478	72750710	233	72750588	20.71	14.0683	7.15108	9.68635	FTE2_peak_143	chr1_72750478_72750710	.	NEGR1	.
chr1	76262100	76262299	200	76262292	14.05	6.40067	3.88419	2.89558	FTE2_peak_144	chr1_76262100_76262299	.	RABGGTB;SNORD45A;SNORD45B;SNORD45C	MSH4
chr1	77464322	77464717	396	77464411	19.97	17.7137	9.79456	13.001	FTE2_peak_145	chr1_77464322_77464717	ST6GALNAC5	.	.
chr1	77980018	77980440	423	77980368	14.79	11.7222	7.37634	7.52556	FTE2_peak_146	chr1_77980018_77980440	AK5	.	.
chr1	78297817	78298042	226	78297891	14.05	8.41215	5.01708	4.59841	FTE2_peak_147	chr1_78297817_78298042	FAM73A	.	.
chr1	78298774	78299004	231	78298904	14.79	11.7222	7.37634	7.52556	FTE2_peak_148	chr1_78298774_78299004	FAM73A	.	.
chr1	78355408	78355582	175	78355516	18.49	9.78344	5.1516	5.82605	FTE2_peak_149	chr1_78355408_78355582	NEXN	FAM73A	.
chr1	78469997	78470201	205	78470094	32.54	34.7451	15.1935	29.2645	FTE2_peak_150	chr1_78469997_78470201	.	FUBP1	DNAJB4
chr1	78472436	78472616	181	78472445	9.61	6.2524	4.83334	2.78775	FTE2_peak_151	chr1_78472436_78472616	DNAJB4	FUBP1	.
chr1	78567342	78568019	678	78567408	18.49	16.4686	9.10364	11.8693	FTE2_peak_152	chr1_78567342_78568019	GIPC2	.	.
chr1	79180796	79180918	123	79180855	10.35	7.42451	5.30358	3.76232	FTE2_peak_153	chr1_79180796_79180918	.	.	.
chr1	79297554	79297677	124	79297626	16.27	7.66459	4.31747	3.98035	FTE2_peak_154	chr1_79297554_79297677	.	.	.
chr1	79299110	79299329	220	79299199	18.49	16.4686	9.10364	11.8693	FTE2_peak_155	chr1_79299110_79299329	.	.	.
chr1	79789104	79789235	132	79789152	14.05	11.7222	7.03088	7.52556	FTE2_peak_156	chr1_79789104_79789235	.	.	.
chr1	80365761	80365955	195	80365851	19.97	13.1909	6.98919	8.88208	FTE2_peak_157	chr1_80365761_80365955	.	.	.
chr1	82172885	82173000	116	82172973	14.79	10.9376	6.86705	6.87724	FTE2_peak_158	chr1_82172885_82173000	.	.	.
chr1	84831083	84831376	294	84831118	12.57	9.5096	6.33996	5.56248	FTE2_peak_159	chr1_84831083_84831376	UOX	SAMD13	.
chr1	85335564	85335691	128	85335640	14.79	11.7222	7.37634	7.52556	FTE2_peak_160	chr1_85335564_85335691	LPAR3	.	.
chr1	85755268	85755382	115	85755293	11.09	8.44993	5.64904	4.59841	FTE2_peak_161	chr1_85755268_85755382	.	BCL10;C1orf52;LOC646626	DDAH1
chr1	85763645	85763784	140	85763705	11.83	8.44993	5.9945	4.59841	FTE2_peak_162	chr1_85763645_85763784	.	BCL10;LOC646626	DDAH1
chr1	85763982	85764102	121	85764048	14.79	8.41215	5.2636	4.59841	FTE2_peak_163	chr1_85763982_85764102	.	BCL10;LOC646626	DDAH1
chr1	85780613	85780873	261	85780712	14.05	11.7222	7.03088	7.52556	FTE2_peak_164	chr1_85780613_85780873	.	.	DDAH1
chr1	85786114	85786356	243	85786217	16.27	5.94584	3.45397	2.50381	FTE2_peak_165	chr1_85786114_85786356	DDAH1	.	.
chr1	85787370	85787535	166	85787451	19.23	13.1909	6.74268	8.88208	FTE2_peak_166	chr1_85787370_85787535	DDAH1	.	.
chr1	85794748	85794895	148	85794798	17.01	13.8552	7.56698	9.51757	FTE2_peak_167	chr1_85794748_85794895	DDAH1	.	.
chr1	85809561	85809716	156	85809647	14.05	6.17368	3.76281	2.71417	FTE2_peak_168	chr1_85809561_85809716	DDAH1	.	.
chr1	85987143	85987295	153	85987177	14.79	8.8907	5.56014	5.02352	FTE2_peak_169	chr1_85987143_85987295	DDAH1	.	.
chr1	85987915	85988189	275	85988028	19.97	13.9994	7.47374	9.65557	FTE2_peak_170	chr1_85987915_85988189	DDAH1	.	.
chr1	86010505	86010655	151	86010569	14.05	8.41215	5.01708	4.59841	FTE2_peak_171	chr1_86010505_86010655	DDAH1	.	.
chr1	86043904	86044084	181	86043949	18.49	7.49757	3.99723	3.83353	FTE2_peak_172	chr1_86043904_86044084	DDAH1	.	CYR61
chr1	86047414	86048600	1187	86047506	27.36	12.5978	4.9629	8.36441	FTE2_peak_173	chr1_86047414_86048600	CYR61	DDAH1	.
chr1	86048690	86050854	2165	86050028	68.78	78.3182	23.2591	71.2218	FTE2_peak_174	chr1_86048690_86050854	CYR61	DDAH1	.
chr1	86072724	86073414	691	86073101	25.14	25.5955	12.2128	20.4399	FTE2_peak_175	chr1_86072724_86073414	.	CYR61;DDAH1	.
chr1	87241337	87241470	134	87241390	13.31	10.6011	6.68542	6.55065	FTE2_peak_176	chr1_87241337_87241470	.	SH3GLB1	.
chr1	88421866	88422130	265	88422024	15.53	12.871	7.7218	8.58244	FTE2_peak_177	chr1_88421866_88422130	.	.	.
chr1	90331646	90331988	343	90331778	19.23	13.1909	6.74268	8.88208	FTE2_peak_178	chr1_90331646_90331988	LRRC8D	.	.
chr1	90350869	90351057	189	90350910	10.35	7.42451	5.30358	3.76232	FTE2_peak_179	chr1_90350869_90351057	LRRC8D	.	.
chr1	90372466	90372595	130	90372533	11.83	8.44993	5.9945	4.59841	FTE2_peak_180	chr1_90372466_90372595	LRRC8D	.	.
chr1	90376524	90376712	189	90376622	12.57	6.6833	4.52406	3.12007	FTE2_peak_181	chr1_90376524_90376712	LRRC8D	.	.
chr1	92165994	92166209	216	92166080	16.27	14.046	8.06726	9.66458	FTE2_peak_182	chr1_92165994_92166209	TGFBR3	.	.
chr1	92261634	92261748	115	92261691	12.57	9.5096	6.33996	5.56248	FTE2_peak_183	chr1_92261634_92261748	TGFBR3	.	.
chr1	92366166	92366386	221	92366267	27.36	26.8429	12.3344	21.6544	FTE2_peak_184	chr1_92366166_92366386	TGFBR3	.	.
chr1	92650372	92650492	121	92650404	14.05	11.7222	7.03088	7.52556	FTE2_peak_185	chr1_92650372_92650492	.	KIAA1107	.
chr1	94159038	94159157	120	94159087	14.79	10.4318	6.53998	6.43792	FTE2_peak_186	chr1_94159038_94159157	.	BCAR3	.
chr1	94245143	94245587	445	94245441	11.83	5.86499	4.27754	2.42626	FTE2_peak_187	chr1_94245143_94245587	.	.	.
chr1	94736463	94736577	115	94736511	15.53	12.871	7.7218	8.58244	FTE2_peak_188	chr1_94736463_94736577	.	.	.
chr1	94791189	94791436	248	94791257	17.01	15.2456	8.41272	10.7426	FTE2_peak_189	chr1_94791189_94791436	.	.	.
chr1	94791530	94791807	278	94791630	19.23	17.7137	9.4491	13.001	FTE2_peak_190	chr1_94791530_94791807	.	.	.
chr1	95112432	95112548	117	95112499	13.31	10.6011	6.68542	6.55065	FTE2_peak_191	chr1_95112432_95112548	.	.	.
chr1	95193523	95193666	144	95193625	11.83	8.44993	5.9945	4.59841	FTE2_peak_192	chr1_95193523_95193666	.	.	.
chr1	95205427	95205544	118	95205469	11.83	8.44993	5.9945	4.59841	FTE2_peak_193	chr1_95205427_95205544	.	.	.
chr1	95239449	95239574	126	95239526	13.31	9.09943	5.73616	5.22244	FTE2_peak_194	chr1_95239449_95239574	.	.	.
chr1	95329565	95329749	185	95329647	14.05	11.7222	7.03088	7.52556	FTE2_peak_195	chr1_95329565_95329749	SLC44A3	.	.
chr1	95489356	95489595	240	95489434	17.01	8.44714	4.50235	4.59841	FTE2_peak_196	chr1_95489356_95489595	ALG14	.	.
chr1	96772415	96772588	174	96772523	11.83	8.44993	5.9945	4.59841	FTE2_peak_197	chr1_96772415_96772588	.	.	.
chr1	96775440	96775610	171	96775536	29.58	24.2325	10.1939	19.1558	FTE2_peak_198	chr1_96775440_96775610	.	.	.
chr1	96778961	96779076	116	96778993	10.35	7.42451	5.30358	3.76232	FTE2_peak_199	chr1_96778961_96779076	.	.	.
chr1	96828174	96828388	215	96828288	25.88	23.5453	11.2957	18.5028	FTE2_peak_200	chr1_96828174_96828388	.	.	.
chr1	96836519	96836685	167	96836587	19.23	10.0802	5.05701	6.10878	FTE2_peak_201	chr1_96836519_96836685	.	.	.
chr1	97025886	97026037	152	97025942	13.31	10.6011	6.68542	6.55065	FTE2_peak_202	chr1_97025886_97026037	.	.	.
chr1	98403521	98403665	145	98403567	14.79	9.66758	6.05011	5.71251	FTE2_peak_203	chr1_98403521_98403665	.	DPYD	.
chr1	98470997	98471158	162	98471060	11.83	8.44993	5.9945	4.59841	FTE2_peak_204	chr1_98470997_98471158	MIR137HG	.	.
chr1	98552342	98552593	252	98552486	34.02	30.322	11.6729	24.993	FTE2_peak_205	chr1_98552342_98552593	.	.	.
chr1	98789627	98789774	148	98789724	12.57	8.12457	5.43975	4.41482	FTE2_peak_206	chr1_98789627_98789774	.	.	.
chr1	98806099	98806450	352	98806288	12.57	9.5096	6.33996	5.56248	FTE2_peak_207	chr1_98806099_98806450	.	.	.
chr1	99369071	99369185	115	99369099	11.09	8.44993	5.64904	4.59841	FTE2_peak_208	chr1_99369071_99369185	LPPR5	.	.
chr1	100128145	100128273	129	100128232	11.09	8.44993	5.64904	4.59841	FTE2_peak_209	chr1_100128145_100128273	PALMD	.	MIR548AA1;MIR548D1
chr1	100148130	100148299	170	100148232	11.83	8.44993	5.9945	4.59841	FTE2_peak_210	chr1_100148130_100148299	PALMD	.	FRRS1;MIR548AA1;MIR548D1
chr1	101062707	101063134	428	101062819	17.01	15.2456	8.41272	10.7426	FTE2_peak_211	chr1_101062707_101063134	.	.	LOC100128787
chr1	101096849	101096979	131	101096938	17.01	10.2385	5.4574	6.25778	FTE2_peak_212	chr1_101096849_101096979	LOC100128787	.	.
chr1	101328204	101328345	142	101328310	11.09	8.44993	5.64904	4.59841	FTE2_peak_213	chr1_101328204_101328345	.	.	EXTL2
chr1	101640441	101640640	200	101640502	22.93	20.1702	10.3017	15.3415	FTE2_peak_214	chr1_101640441_101640640	.	.	.
chr1	103345227	103345442	216	103345356	17.75	15.2456	8.75818	10.7426	FTE2_peak_215	chr1_103345227_103345442	COL11A1	.	.
chr1	103737151	103737265	115	103737225	14.05	11.7222	7.03088	7.52556	FTE2_peak_216	chr1_103737151_103737265	.	.	.
chr1	109045796	109046063	268	109045874	27.36	28.361	13.2492	23.1052	FTE2_peak_217	chr1_109045796_109046063	.	.	.
chr1	109740083	109740260	178	109740167	17.75	11.2084	6.24965	7.11989	FTE2_peak_218	chr1_109740083_109740260	KIAA1324	.	SARS
chr1	109841736	109841887	152	109841829	14.05	10.8849	6.51287	6.82737	FTE2_peak_219	chr1_109841736_109841887	MYBPHL	CELSR2;PSRC1	SORT1
chr1	109934090	109934266	177	109934190	10.35	7.30401	5.22483	3.70722	FTE2_peak_220	chr1_109934090_109934266	SORT1	.	PSMA5
chr1	110138253	110138367	115	110138322	11.83	8.44993	5.9945	4.59841	FTE2_peak_221	chr1_110138253_110138367	GNAI3	.	AMPD2;GNAT2;MIR197
chr1	110518480	110518630	151	110518555	22.19	20.1702	9.98329	15.3415	FTE2_peak_222	chr1_110518480_110518630	.	.	AHCYL1
chr1	110598396	110598558	163	110598552	9.61	6.03577	4.6861	2.5834	FTE2_peak_223	chr1_110598396_110598558	.	FAM40A	ALX3
chr1	111625166	111625372	207	111625229	22.93	12.6839	5.98143	8.44419	FTE2_peak_224	chr1_111625166_111625372	.	.	.
chr1	112250641	112250787	147	112250703	14.05	6.17368	3.76281	2.71417	FTE2_peak_225	chr1_112250641_112250787	RAP1A	.	FAM212B
chr1	112946999	112947307	309	112947180	21.45	19.837	10.2216	15.0165	FTE2_peak_226	chr1_112946999_112947307	CTTNBP2NL	.	.
chr1	113065386	113065570	185	113065489	13.31	10.6011	6.68542	6.55065	FTE2_peak_227	chr1_113065386_113065570	.	WNT2B	ST7L
chr1	115677779	115677939	161	115677839	11.83	8.44993	5.9945	4.59841	FTE2_peak_228	chr1_115677779_115677939	.	.	.
chr1	115711262	115711642	381	115711470	17.75	15.2456	8.75818	10.7426	FTE2_peak_229	chr1_115711262_115711642	.	.	.
chr1	115722079	115722352	274	115722138	13.31	10.6011	6.68542	6.55065	FTE2_peak_230	chr1_115722079_115722352	.	.	.
chr1	115968997	115969437	441	115969075	21.45	20.2661	10.4855	15.4078	FTE2_peak_231	chr1_115968997_115969437	.	.	.
chr1	116088485	116088711	227	116088579	14.79	6.17368	3.9477	2.71417	FTE2_peak_232	chr1_116088485_116088711	.	.	.
chr1	117533478	117533656	179	117533563	14.05	11.7222	7.03088	7.52556	FTE2_peak_233	chr1_117533478_117533656	.	PTGFRN	CD101
chr1	118364505	118364742	238	118364647	11.83	8.44993	5.9945	4.59841	FTE2_peak_234	chr1_118364505_118364742	.	.	.
chr1	118381658	118381789	132	118381711	12.57	8.97564	5.99213	5.10349	FTE2_peak_235	chr1_118381658_118381789	.	.	GDAP2
chr1	119822098	119822369	272	119822173	22.19	21.5715	10.8309	16.6194	FTE2_peak_236	chr1_119822098_119822369	.	.	.
chr1	120216481	120216622	142	120216530	11.09	8.44993	5.64904	4.59841	FTE2_peak_237	chr1_120216481_120216622	.	ZNF697	.
chr1	120218093	120218207	115	120218118	9.61	6.43625	4.95812	2.89558	FTE2_peak_238	chr1_120218093_120218207	.	ZNF697	.
chr1	144008239	144008441	203	144008339	18.49	9.25272	4.87212	5.36966	FTE2_peak_239	chr1_144008239_144008441	FLJ39739;SRGAP2P2	.	.
chr1	144012682	144013174	493	144012824	19.97	10.0802	5.24189	6.10878	FTE2_peak_240	chr1_144012682_144013174	FLJ39739;SRGAP2P2	.	.
chr1	144013516	144013642	127	144013564	17.75	8.89062	4.92616	5.02352	FTE2_peak_241	chr1_144013516_144013642	FLJ39739;SRGAP2P2	.	.
chr1	144534186	144534352	167	144534205	15.53	9.31879	5.51011	5.42449	FTE2_peak_242	chr1_144534186_144534352	FLJ39739;LOC728855;PPIAL4A;PPIAL4B;PPIAL4C	LOC728875	.
chr1	144891937	144892086	150	144892002	19.23	17.4047	9.2598	12.765	FTE2_peak_243	chr1_144891937_144892086	FLJ39739;LOC728855;PDE4DIP;PPIAL4A;PPIAL4B;PPIAL4C	.	.
chr1	145083506	145083765	260	145083701	34.02	15.306	5.00269	10.7944	FTE2_peak_244	chr1_145083506_145083765	FLJ39739;LOC728855;PPIAL4A;PPIAL4B;PPIAL4C	PDE4DIP	SEC22B
chr1	145114169	145114882	714	145114713	71.74	71.9962	18.7704	65.2498	FTE2_peak_245	chr1_145114169_145114882	FLJ39739;LOC728855;PPIAL4A;PPIAL4B;PPIAL4C;SEC22B	.	.
chr1	145117951	145118166	216	145118145	14.05	8.37661	4.99627	4.59841	FTE2_peak_246	chr1_145117951_145118166	FLJ39739;LOC728855;PPIAL4A;PPIAL4B;PPIAL4C	SEC22B	.
chr1	145292253	145292623	371	145292567	11.83	8.44993	5.9945	4.59841	FTE2_peak_247	chr1_145292253_145292623	FLJ39739;LOC728855;PPIAL4A;PPIAL4B;PPIAL4C	NOTCH2NL	NBPF10
chr1	145382785	145383299	515	145383095	28.1	22.0186	9.13736	17.0496	FTE2_peak_248	chr1_145382785_145383299	FLJ39739;LOC728855;PPIAL4A;PPIAL4B;PPIAL4C	NBPF10	HFE2
chr1	145440092	145440316	225	145440228	9.61	6.43625	4.95812	2.89558	FTE2_peak_249	chr1_145440092_145440316	FLJ39739;LOC728855;PPIAL4A;PPIAL4B;PPIAL4C;TXNIP	HFE2	POLR3GL
chr1	145440550	145440707	158	145440621	9.61	6.28986	4.85878	2.82158	FTE2_peak_250	chr1_145440550_145440707	FLJ39739;LOC728855;PPIAL4A;PPIAL4B;PPIAL4C;TXNIP	HFE2	ANKRD34A;POLR3GL
chr1	145442467	145443184	718	145443110	21.45	18.546	9.43137	13.8004	FTE2_peak_251	chr1_145442467_145443184	FLJ39739;LOC728855;PPIAL4A;PPIAL4B;PPIAL4C;TXNIP	HFE2	ANKRD34A;POLR3GL
chr1	145443586	145443719	134	145443663	14.79	8.8907	5.56014	5.02352	FTE2_peak_252	chr1_145443586_145443719	FLJ39739;LOC728855;PPIAL4A;PPIAL4B;PPIAL4C	HFE2;TXNIP	ANKRD34A;POLR3GL
chr1	145455997	145456162	166	145456101	17.01	14.9693	8.24418	10.5483	FTE2_peak_253	chr1_145455997_145456162	FLJ39739;LOC728855;PPIAL4A;PPIAL4B;PPIAL4C	TXNIP	ANKRD34A;LIX1L;POLR3GL
chr1	145652314	145652561	248	145652443	19.97	17.0167	9.35217	12.3983	FTE2_peak_254	chr1_145652314_145652561	FLJ39739;LOC728855;PPIAL4A;PPIAL4B;PPIAL4C;RNF115	.	.
chr1	147806631	147806833	203	147806757	19.97	11.0282	5.75242	6.96452	FTE2_peak_255	chr1_147806631_147806833	FLJ39739;LOC728855;PPIAL4A;PPIAL4B;PPIAL4C	.	.
chr1	147994129	147994281	153	147994205	21.45	20.2661	10.4855	15.4078	FTE2_peak_256	chr1_147994129_147994281	LOC728855;PPIAL4A;PPIAL4B;PPIAL4C	.	NBPF14
chr1	148241448	148241681	234	148241571	28.84	18.3673	7.46051	13.6331	FTE2_peak_257	chr1_148241448_148241681	LOC728855;PPIAL4A;PPIAL4B;PPIAL4C;PPIAL4D;PPIAL4F	.	.
chr1	148604859	148604986	128	148604921	18.49	16.4686	9.10364	11.8693	FTE2_peak_258	chr1_148604859_148604986	LOC728855;NBPF16;PPIAL4A;PPIAL4B;PPIAL4C;PPIAL4D;PPIAL4F	NBPF15	.
chr1	149223208	149224107	900	149223883	83.57	84.0113	19.5082	76.4883	FTE2_peak_259	chr1_149223208_149224107	LOC728855;PPIAL4A;PPIAL4B;PPIAL4C	.	.
chr1	150508534	150508678	145	150508642	17.01	11.707	6.2904	7.52556	FTE2_peak_260	chr1_150508534_150508678	.	ECM1;TARS2	ADAMTSL4;MIR4257
chr1	150545272	150545443	172	150545378	12.57	9.26466	6.18041	5.37933	FTE2_peak_261	chr1_150545272_150545443	.	ADAMTSL4;MIR4257	MCL1
chr1	150577254	150577464	211	150577329	11.83	6.97362	5.00493	3.39703	FTE2_peak_262	chr1_150577254_150577464	.	MCL1	ENSA
chr1	150854272	150854388	117	150854353	16.27	11.5513	6.53049	7.45141	FTE2_peak_263	chr1_150854272_150854388	.	ARNT	.
chr1	152135473	152135587	115	152135574	9.61	6.43625	4.95812	2.89558	FTE2_peak_264	chr1_152135473_152135587	.	RPTN	.
chr1	155733241	155733432	192	155733328	14.79	8.41215	5.2636	4.59841	FTE2_peak_265	chr1_155733241_155733432	GON4L	DAP3;MSTO2P	.
chr1	156571162	156571332	171	156571171	8.87	5.32497	4.49657	2.08579	FTE2_peak_266	chr1_156571162_156571332	GPATCH4	APOA1BP;IQGAP3;TTC24	HAPLN2
chr1	156736944	156737290	347	156737229	32.54	19.0421	6.8309	14.2543	FTE2_peak_267	chr1_156736944_156737290	PRCC	HDGF;MRPL24	.
chr1	157980636	157980819	184	157980732	12.57	8.88312	5.93189	5.01724	FTE2_peak_268	chr1_157980636_157980819	KIRREL	.	.
chr1	157989488	157989602	115	157989515	16.27	10.2513	5.75662	6.26333	FTE2_peak_269	chr1_157989488_157989602	KIRREL	.	.
chr1	159010102	159010352	251	159010240	11.83	8.44993	5.9945	4.59841	FTE2_peak_270	chr1_159010102_159010352	IFI16	.	AIM2
chr1	159252068	159252308	241	159252086	12.57	6.6833	4.52406	3.12007	FTE2_peak_271	chr1_159252068_159252308	.	.	FCER1A
chr1	159567974	159568235	262	159568070	31.06	33.9619	14.9119	28.5206	FTE2_peak_272	chr1_159567974_159568235	.	APCS	.
chr1	159721891	159722149	259	159722040	14.05	11.7222	7.03088	7.52556	FTE2_peak_273	chr1_159721891_159722149	.	.	DUSP23
chr1	159849913	159850046	134	159849963	13.31	10.6011	6.68542	6.55065	FTE2_peak_274	chr1_159849913_159850046	CCDC19	C1orf204;VSIG8	.
chr1	160094534	160094821	288	160094635	14.79	8.41215	5.2636	4.59841	FTE2_peak_275	chr1_160094534_160094821	ATP1A2	IGSF8	ATP1A4
chr1	161142822	161143112	291	161142891	16.27	12.0906	6.85857	7.88211	FTE2_peak_276	chr1_161142822_161143112	B4GALT3	PPOX;UFC1;USP21	ADAMTS4;NDUFS2
chr1	161883660	161883787	128	161883755	11.09	8.44993	5.64904	4.59841	FTE2_peak_277	chr1_161883660_161883787	ATF6	.	.
chr1	162272562	162272844	283	162272629	11.83	8.44993	5.9945	4.59841	FTE2_peak_278	chr1_162272562_162272844	NOS1AP	.	.
chr1	162319681	162319807	127	162319745	17.75	15.2456	8.75818	10.7426	FTE2_peak_279	chr1_162319681_162319807	NOS1AP	MIR556	C1orf111;C1orf226
chr1	162508736	162508930	195	162508825	17.01	13.8552	7.56698	9.51757	FTE2_peak_280	chr1_162508736_162508930	.	UHMK1	UAP1
chr1	162648385	162648620	236	162648553	9.61	6.43625	4.95812	2.89558	FTE2_peak_281	chr1_162648385_162648620	DDR2	.	.
chr1	162660784	162660944	161	162660840	14.79	11.7222	7.37634	7.52556	FTE2_peak_282	chr1_162660784_162660944	DDR2	.	.
chr1	162816719	162816885	167	162816796	9.61	6.43625	4.95812	2.89558	FTE2_peak_283	chr1_162816719_162816885	.	.	C1orf110
chr1	162826119	162826385	267	162826272	19.97	17.7137	9.79456	13.001	FTE2_peak_284	chr1_162826119_162826385	C1orf110	.	.
chr1	162843362	162843748	387	162843569	20.71	14.2141	7.2357	9.82357	FTE2_peak_285	chr1_162843362_162843748	.	C1orf110	.
chr1	164676477	164676663	187	164676612	17.75	11.2084	6.24965	7.11989	FTE2_peak_286	chr1_164676477_164676663	PBX1	.	.
chr1	164695604	164695743	140	164695688	14.05	11.7222	7.03088	7.52556	FTE2_peak_287	chr1_164695604_164695743	PBX1	.	.
chr1	164717962	164718090	129	164718029	13.31	10.6011	6.68542	6.55065	FTE2_peak_288	chr1_164717962_164718090	PBX1	.	LOC100505795
chr1	164736806	164736939	134	164736831	14.05	6.17368	3.76281	2.71417	FTE2_peak_289	chr1_164736806_164736939	PBX1	.	LOC100505795
chr1	165742680	165742841	162	165742782	14.05	11.4364	6.85394	7.33903	FTE2_peak_290	chr1_165742680_165742841	.	TMCO1	.
chr1	165823438	165823577	140	165823540	17.75	11.2084	6.24965	7.11989	FTE2_peak_291	chr1_165823438_165823577	UCK2	.	.
chr1	165868139	165868281	143	165868260	11.83	5.86499	4.27754	2.42626	FTE2_peak_292	chr1_165868139_165868281	UCK2	.	MIR3658
chr1	166913924	166914057	134	166914006	14.79	11.7222	7.37634	7.52556	FTE2_peak_293	chr1_166913924_166914057	ILDR2	.	.
chr1	167761203	167761431	229	167761384	15.53	12.871	7.7218	8.58244	FTE2_peak_294	chr1_167761203_167761431	.	MPZL1	ADCY10
chr1	168438968	168439087	120	168439036	11.09	8.44993	5.64904	4.59841	FTE2_peak_295	chr1_168438968_168439087	.	.	.
chr1	170592366	170592526	161	170592414	8.87	5.4605	4.59278	2.08579	FTE2_peak_296	chr1_170592366_170592526	.	.	.
chr1	171096709	171096950	242	171096842	23.67	19.9271	9.70691	15.1045	FTE2_peak_297	chr1_171096709_171096950	.	FMO3;MIR1295A	FMO6P
chr1	171111410	171111530	121	171111498	12.57	9.5096	6.33996	5.56248	FTE2_peak_298	chr1_171111410_171111530	FMO6P	FMO3	.
chr1	171763273	171763474	202	171763419	17.75	11.2084	6.24965	7.11989	FTE2_peak_299	chr1_171763273_171763474	METTL13	.	.
chr1	172224138	172224285	148	172224220	14.05	10.8849	6.51287	6.82737	FTE2_peak_300	chr1_172224138_172224285	DNM3	.	.
chr1	172291610	172291765	156	172291704	15.53	12.871	7.7218	8.58244	FTE2_peak_301	chr1_172291610_172291765	DNM3	.	.
chr1	172328354	172328468	115	172328361	10.35	7.42451	5.30358	3.76232	FTE2_peak_302	chr1_172328354_172328468	DNM3	.	.
chr1	172715529	172715797	269	172715635	13.31	10.6011	6.68542	6.55065	FTE2_peak_303	chr1_172715529_172715797	.	.	.
chr1	172828401	172828597	197	172828536	18.49	5.85335	3.24808	2.42626	FTE2_peak_304	chr1_172828401_172828597	.	.	.
chr1	172887236	172887448	213	172887375	17.01	11.2084	6.00314	7.11989	FTE2_peak_305	chr1_172887236_172887448	.	.	.
chr1	172903147	172903261	115	172903209	17.01	8.44714	4.50235	4.59841	FTE2_peak_306	chr1_172903147_172903261	.	.	.
chr1	172924644	172924840	197	172924758	15.53	12.871	7.7218	8.58244	FTE2_peak_307	chr1_172924644_172924840	.	.	.
chr1	173238451	173239123	673	173238720	29.58	31.1873	14.2856	25.8289	FTE2_peak_308	chr1_173238451_173239123	LOC100506023	.	.
chr1	173831705	173831860	156	173831707	14.79	6.17368	3.9477	2.71417	FTE2_peak_309	chr1_173831705_173831860	.	DARS2	GAS5;LOC100506046;SNORD44;SNORD47;SNORD74;SNORD75;SNORD76;SNORD77;SNORD78;SNORD79;SNORD80;SNORD81;ZBTB37
chr1	173832333	173832587	255	173832431	10.35	6.94092	4.98728	3.3648	FTE2_peak_310	chr1_173832333_173832587	LOC100506046	DARS2	GAS5;SNORD44;SNORD47;SNORD74;SNORD75;SNORD76;SNORD77;SNORD78;SNORD79;SNORD80;SNORD81;ZBTB37
chr1	174937899	174938064	166	174937966	14.05	11.0989	6.64514	7.02758	FTE2_peak_311	chr1_174937899_174938064	RABGAP1L	.	.
chr1	176765143	176765258	116	176765233	11.09	8.44993	5.64904	4.59841	FTE2_peak_312	chr1_176765143_176765258	PAPPA2	.	.
chr1	178207894	178208280	387	178208105	36.98	32.8458	12.659	27.433	FTE2_peak_313	chr1_178207894_178208280	RASAL2	.	.
chr1	180120822	180120963	142	180120879	18.49	12.0162	6.39596	7.80979	FTE2_peak_314	chr1_180120822_180120963	.	.	QSOX1
chr1	181064052	181064282	231	181064198	12.57	6.6833	4.52406	3.12007	FTE2_peak_315	chr1_181064052_181064282	.	IER5	.
chr1	181439137	181439297	161	181439244	11.09	8.44993	5.64904	4.59841	FTE2_peak_316	chr1_181439137_181439297	.	.	CACNA1E
chr1	182228675	182228789	115	182228701	12.57	8.12457	5.43975	4.41482	FTE2_peak_317	chr1_182228675_182228789	.	.	.
chr1	182259216	182259574	359	182259415	12.57	9.46765	6.31264	5.56248	FTE2_peak_318	chr1_182259216_182259574	.	.	.
chr1	182925445	182925662	218	182925565	18.49	10.3686	5.46738	6.37758	FTE2_peak_319	chr1_182925445_182925662	.	SHCBP1L	.
chr1	182959650	182959825	176	182959757	9.61	6.43625	4.95812	2.89558	FTE2_peak_320	chr1_182959650_182959825	.	.	.
chr1	183241640	183241755	116	183241671	13.31	10.5556	6.65661	6.55065	FTE2_peak_321	chr1_183241640_183241755	NMNAT2	LAMC2	.
chr1	183250366	183250510	145	183250448	8.87	5.32497	4.49657	2.08579	FTE2_peak_322	chr1_183250366_183250510	NMNAT2	.	.
chr1	183601355	183601478	124	183601428	24.4	14.5125	6.3512	10.1056	FTE2_peak_323	chr1_183601355_183601478	ARPC5	.	APOBEC4;RGL1
chr1	183811611	183811899	289	183811811	25.88	25.5955	12.5582	20.4399	FTE2_peak_324	chr1_183811611_183811899	RGL1	.	.
chr1	183850824	183851030	207	183850934	11.09	8.44993	5.64904	4.59841	FTE2_peak_325	chr1_183850824_183851030	RGL1	.	.
chr1	183865741	183865892	152	183865792	11.09	8.44993	5.64904	4.59841	FTE2_peak_326	chr1_183865741_183865892	RGL1	.	.
chr1	184026156	184026303	148	184026235	10.35	7.42451	5.30358	3.76232	FTE2_peak_327	chr1_184026156_184026303	TSEN15	GLT25D2	.
chr1	184836257	184836404	148	184836341	20.71	18.9798	10.14	14.1948	FTE2_peak_328	chr1_184836257_184836404	FAM129A	.	.
chr1	185410878	185411101	224	185410980	19.23	13.1909	6.74268	8.88208	FTE2_peak_329	chr1_185410878_185411101	.	.	.
chr1	185940850	185941061	212	185940960	17.75	15.2456	8.75818	10.7426	FTE2_peak_330	chr1_185940850_185941061	HMCN1	.	.
chr1	185942922	185943121	200	185943015	14.05	11.7222	7.03088	7.52556	FTE2_peak_331	chr1_185942922_185943121	HMCN1	.	.
chr1	186762364	186762496	133	186762435	11.83	8.44993	5.9945	4.59841	FTE2_peak_332	chr1_186762364_186762496	.	.	.
chr1	192454959	192455127	169	192455066	13.31	10.6011	6.68542	6.55065	FTE2_peak_333	chr1_192454959_192455127	.	.	.
chr1	192528712	192528830	119	192528777	14.05	11.7222	7.03088	7.52556	FTE2_peak_334	chr1_192528712_192528830	.	.	RGS1
chr1	192671447	192671571	125	192671502	13.31	10.6011	6.68542	6.55065	FTE2_peak_335	chr1_192671447_192671571	.	.	.
chr1	193291516	193291664	149	193291600	15.53	11.3343	6.74983	7.24055	FTE2_peak_336	chr1_193291516_193291664	.	.	.
chr1	193305009	193305372	364	193305275	19.97	13.1909	6.98919	8.88208	FTE2_peak_337	chr1_193305009_193305372	.	.	.
chr1	196370082	196370202	121	196370106	11.83	8.44993	5.9945	4.59841	FTE2_peak_338	chr1_196370082_196370202	KCNT2	.	.
chr1	197143358	197143504	147	197143420	15.53	12.871	7.7218	8.58244	FTE2_peak_339	chr1_197143358_197143504	ZBTB41	ASPM	.
chr1	198137355	198137519	165	198137486	10.35	7.42451	5.30358	3.76232	FTE2_peak_340	chr1_198137355_198137519	NEK7	.	.
chr1	198227775	198227905	131	198227817	14.05	11.7222	7.03088	7.52556	FTE2_peak_341	chr1_198227775_198227905	NEK7	.	.
chr1	198228577	198228719	143	198228614	13.31	10.6011	6.68542	6.55065	FTE2_peak_342	chr1_198228577_198228719	NEK7	.	.
chr1	198412595	198412824	230	198412772	22.19	18.3246	8.8836	13.5946	FTE2_peak_343	chr1_198412595_198412824	.	.	.
chr1	198462089	198462328	240	198462179	21.45	16.9801	8.48805	12.3627	FTE2_peak_344	chr1_198462089_198462328	.	.	.
chr1	198638322	198638507	186	198638372	23.67	17.4005	8.22176	12.7612	FTE2_peak_345	chr1_198638322_198638507	PTPRC	.	.
chr1	198745880	198746008	129	198745949	16.27	14.046	8.06726	9.66458	FTE2_peak_346	chr1_198745880_198746008	.	PTPRC	.
chr1	199053885	199054074	190	199053997	11.83	8.44993	5.9945	4.59841	FTE2_peak_347	chr1_199053885_199054074	.	.	.
chr1	199092824	199092993	170	199092905	15.53	12.871	7.7218	8.58244	FTE2_peak_348	chr1_199092824_199092993	.	.	.
chr1	199241869	199242105	237	199242038	19.97	16.1584	8.8099	11.6151	FTE2_peak_349	chr1_199241869_199242105	.	.	.
chr1	199711874	199711988	115	199711903	11.83	8.41146	5.96867	4.59841	FTE2_peak_350	chr1_199711874_199711988	.	.	.
chr1	200283618	200283801	184	200283705	14.79	11.7222	7.37634	7.52556	FTE2_peak_351	chr1_200283618_200283801	.	.	C1orf98
chr1	200305711	200305918	208	200305755	12.57	8.97564	5.99213	5.10349	FTE2_peak_352	chr1_200305711_200305918	.	.	C1orf98
chr1	200348539	200348735	197	200348646	10.35	7.42451	5.30358	3.76232	FTE2_peak_353	chr1_200348539_200348735	.	C1orf98	ZNF281
chr1	200385103	200385245	143	200385160	14.79	9.54341	5.97118	5.59337	FTE2_peak_354	chr1_200385103_200385245	.	ZNF281	.
chr1	201562561	201562824	264	201562753	19.23	15.9582	8.37773	11.4254	FTE2_peak_355	chr1_201562561_201562824	.	.	.
chr1	201594560	201594678	119	201594603	16.27	10.2513	5.75662	6.26333	FTE2_peak_356	chr1_201594560_201594678	.	.	NAV1
chr1	201718942	201719074	133	201718977	11.83	8.41146	5.96867	4.59841	FTE2_peak_357	chr1_201718942_201719074	NAV1	.	.
chr1	201720072	201720453	382	201720236	22.93	20.6768	10.6171	15.804	FTE2_peak_358	chr1_201720072_201720453	NAV1	.	.
chr1	201723161	201723275	115	201723237	10.35	7.34654	5.25263	3.74831	FTE2_peak_359	chr1_201723161_201723275	NAV1	.	.
chr1	201796294	201796462	169	201796406	13.31	8.46774	5.34218	4.61593	FTE2_peak_360	chr1_201796294_201796462	.	MIR1231;NAV1	IPO9
chr1	201819038	201819152	115	201819139	11.09	8.44993	5.64904	4.59841	FTE2_peak_361	chr1_201819038_201819152	IPO9	NAV1	.
chr1	202252451	202252600	150	202252593	16.27	7.66459	4.31747	3.98035	FTE2_peak_362	chr1_202252451_202252600	LGR6	.	.
chr1	202584795	202585000	206	202584839	20.71	13.9292	7.07072	9.58975	FTE2_peak_363	chr1_202584795_202585000	SYT2	PPP1R12B	.
chr1	203506126	203506240	115	203506169	11.09	5.86499	4.03103	2.42626	FTE2_peak_364	chr1_203506126_203506240	.	OPTC	.
chr1	203527335	203527726	392	203527661	19.97	15.4488	8.36528	10.9352	FTE2_peak_365	chr1_203527335_203527726	.	.	.
chr1	203858135	203858249	115	203858218	17.01	13.2766	7.2182	8.96299	FTE2_peak_366	chr1_203858135_203858249	.	SNRPE	.
chr1	203858580	203858778	199	203858683	21.45	18.0376	9.1228	13.317	FTE2_peak_367	chr1_203858580_203858778	.	SNRPE	.
chr1	203876217	203876353	137	203876254	14.05	10.2888	6.14588	6.29946	FTE2_peak_368	chr1_203876217_203876353	.	.	.
chr1	204140871	204141247	377	204140983	24.4	24.153	11.8162	19.0972	FTE2_peak_369	chr1_204140871_204141247	.	ETNK2;REN	GOLT1A;KISS1
chr1	204288787	204288947	161	204288854	22.93	21.5715	11.1764	16.6194	FTE2_peak_370	chr1_204288787_204288947	PLEKHA6	.	.
chr1	205267667	205267781	115	205267699	14.79	8.71347	5.4498	4.8523	FTE2_peak_371	chr1_205267667_205267781	.	TMCC2	NUAK2
chr1	205858949	205859088	140	205859002	14.79	11.7222	7.37634	7.52556	FTE2_peak_372	chr1_205858949_205859088	LOC284581	.	SLC26A9
chr1	206763453	206763652	200	206763551	17.75	15.1131	8.67405	10.6865	FTE2_peak_373	chr1_206763453_206763652	.	RASSF5	EIF2D
chr1	207064086	207064436	351	207064158	13.31	10.6011	6.68542	6.55065	FTE2_peak_374	chr1_207064086_207064436	.	IL20	FAIM3;IL24
chr1	207066083	207066197	115	207066104	11.09	8.44993	5.64904	4.59841	FTE2_peak_375	chr1_207066083_207066197	.	IL20	FAIM3;IL24
chr1	207414644	207414788	145	207414734	16.27	12.6814	7.22135	8.44419	FTE2_peak_376	chr1_207414644_207414788	.	.	.
chr1	207483153	207483267	115	207483236	11.83	8.44993	5.9945	4.59841	FTE2_peak_377	chr1_207483153_207483267	.	.	CD55
chr1	208020567	208020681	115	208020623	13.31	10.6011	6.68542	6.55065	FTE2_peak_378	chr1_208020567_208020681	.	LOC148696	.
chr1	208380878	208381117	240	208381029	22.93	21.5715	11.1764	16.6194	FTE2_peak_379	chr1_208380878_208381117	PLXNA2	.	.
chr1	208427960	208428579	620	208428416	18.49	5.85335	3.24808	2.42626	FTE2_peak_380	chr1_208427960_208428579	.	PLXNA2	.
chr1	210013375	210013513	139	210013428	14.79	8.41215	5.2636	4.59841	FTE2_peak_381	chr1_210013375_210013513	DIEXF	.	.
chr1	210361687	210361825	139	210361723	14.05	11.6732	7.00058	7.52556	FTE2_peak_382	chr1_210361687_210361825	.	SYT14	.
chr1	210412759	210412930	172	210412821	13.31	7.53305	4.77057	3.8596	FTE2_peak_383	chr1_210412759_210412930	SERTAD4	C1orf133	.
chr1	210546675	210547639	965	210547100	43.63	50.8105	19.9076	44.7759	FTE2_peak_384	chr1_210546675_210547639	HHAT	.	.
chr1	210567087	210567297	211	210567235	14.05	10.5787	6.32406	6.55065	FTE2_peak_385	chr1_210567087_210567297	HHAT	.	.
chr1	210612338	210612984	647	210612679	19.23	17.7137	9.4491	13.001	FTE2_peak_386	chr1_210612338_210612984	HHAT	.	.
chr1	210771450	210771979	530	210771831	22.93	21.5715	11.1764	16.6194	FTE2_peak_387	chr1_210771450_210771979	HHAT	.	.
chr1	211371633	211371747	115	211371684	11.83	8.31742	5.90549	4.59841	FTE2_peak_388	chr1_211371633_211371747	.	.	.
chr1	212840930	212841072	143	212840975	17.01	15.1131	8.3319	10.6865	FTE2_peak_389	chr1_212840930_212841072	.	.	BATF3
chr1	214470493	214470658	166	214470603	12.57	9.5096	6.33996	5.56248	FTE2_peak_390	chr1_214470493_214470658	SMYD2	.	.
chr1	214568043	214568180	138	214568111	19.23	7.99138	4.04561	4.28737	FTE2_peak_391	chr1_214568043_214568180	PTPN14	.	.
chr1	214577619	214577735	117	214577665	15.53	12.871	7.7218	8.58244	FTE2_peak_392	chr1_214577619_214577735	PTPN14	.	.
chr1	214650412	214650549	138	214650518	15.53	9.31879	5.51011	5.42449	FTE2_peak_393	chr1_214650412_214650549	PTPN14	.	.
chr1	214655757	214655872	116	214655832	11.83	8.44993	5.9945	4.59841	FTE2_peak_394	chr1_214655757_214655872	PTPN14	.	.
chr1	214755241	214755462	222	214755327	10.35	7.42451	5.30358	3.76232	FTE2_peak_395	chr1_214755241_214755462	.	.	CENPF
chr1	215011781	215012009	229	215011946	16.27	14.046	8.06726	9.66458	FTE2_peak_396	chr1_215011781_215012009	.	.	.
chr1	215016157	215016516	360	215016311	22.93	21.5715	11.1764	16.6194	FTE2_peak_397	chr1_215016157_215016516	.	.	.
chr1	215016903	215017081	179	215016992	8.87	5.48854	4.61266	2.08579	FTE2_peak_398	chr1_215016903_215017081	.	.	.
chr1	215038332	215038568	237	215038461	22.19	21.5715	10.8309	16.6194	FTE2_peak_399	chr1_215038332_215038568	.	.	.
chr1	215076430	215076697	268	215076456	12.57	9.46765	6.31264	5.56248	FTE2_peak_400	chr1_215076430_215076697	.	.	.
chr1	215130689	215131085	397	215130850	18.49	12.1886	6.49616	7.97106	FTE2_peak_401	chr1_215130689_215131085	.	.	.
chr1	215131522	215131636	115	215131576	10.35	7.42451	5.30358	3.76232	FTE2_peak_402	chr1_215131522_215131636	.	.	.
chr1	215141329	215141467	139	215141412	11.09	8.44993	5.64904	4.59841	FTE2_peak_403	chr1_215141329_215141467	.	.	.
chr1	215175640	215176137	498	215175919	28.1	29.7668	13.5946	24.4572	FTE2_peak_404	chr1_215175640_215176137	.	.	KCNK2
chr1	215196959	215197165	207	215197067	11.09	8.44993	5.64904	4.59841	FTE2_peak_405	chr1_215196959_215197165	KCNK2	.	.
chr1	215447298	215447421	124	215447367	17.75	15.2456	8.75818	10.7426	FTE2_peak_406	chr1_215447298_215447421	.	.	.
chr1	215649170	215649432	263	215649281	17.75	15.2456	8.75818	10.7426	FTE2_peak_407	chr1_215649170_215649432	.	.	.
chr1	215649585	215649860	276	215649785	19.97	16.8668	9.2572	12.2516	FTE2_peak_408	chr1_215649585_215649860	.	.	.
chr1	215922801	215923020	220	215922907	19.23	17.7137	9.4491	13.001	FTE2_peak_409	chr1_215922801_215923020	USH2A	.	.
chr1	218653532	218653879	348	218653803	19.23	13.1909	6.74268	8.88208	FTE2_peak_410	chr1_218653532_218653879	.	.	.
chr1	218653999	218654328	330	218654259	11.09	8.44993	5.64904	4.59841	FTE2_peak_411	chr1_218653999_218654328	.	.	.
chr1	218669902	218670303	402	218669995	16.27	10.2513	5.75662	6.26333	FTE2_peak_412	chr1_218669902_218670303	.	.	.
chr1	218671170	218671308	139	218671237	14.05	11.7222	7.03088	7.52556	FTE2_peak_413	chr1_218671170_218671308	.	.	.
chr1	218671747	218672200	454	218672021	14.05	11.7222	7.03088	7.52556	FTE2_peak_414	chr1_218671747_218672200	.	.	.
chr1	218847975	218848121	147	218848044	23.67	22.8954	11.5219	17.8823	FTE2_peak_415	chr1_218847975_218848121	.	.	.
chr1	218853791	218853976	186	218853873	15.53	12.871	7.7218	8.58244	FTE2_peak_416	chr1_218853791_218853976	.	.	.
chr1	218879288	218879837	550	218879468	30.32	25.4237	10.4404	20.304	FTE2_peak_417	chr1_218879288_218879837	.	.	.
chr1	218996619	218996963	345	218996896	20.71	18.8239	10.0426	14.0718	FTE2_peak_418	chr1_218996619_218996963	.	.	.
chr1	219104340	219104498	159	219104454	10.35	7.42451	5.30358	3.76232	FTE2_peak_419	chr1_219104340_219104498	.	.	.
chr1	219262394	219262568	175	219262499	17.01	6.60524	3.60188	3.05596	FTE2_peak_420	chr1_219262394_219262568	LOC643723	.	.
chr1	219691990	219692106	117	219692047	13.31	10.6011	6.68542	6.55065	FTE2_peak_421	chr1_219691990_219692106	.	.	.
chr1	220174428	220174605	178	220174498	17.01	15.2456	8.41272	10.7426	FTE2_peak_422	chr1_220174428_220174605	EPRS;RNU5F-1	.	.
chr1	221130725	221130866	142	221130811	22.19	16.3197	7.72873	11.7609	FTE2_peak_423	chr1_221130725_221130866	.	.	.
chr1	221262683	221262854	172	221262689	8.87	5.48854	4.61266	2.08579	FTE2_peak_424	chr1_221262683_221262854	.	.	.
chr1	221271140	221271434	295	221271241	24.4	11.8043	5.08096	7.60192	FTE2_peak_425	chr1_221271140_221271434	.	.	.
chr1	221271759	221271948	190	221271814	12.57	9.5096	6.33996	5.56248	FTE2_peak_426	chr1_221271759_221271948	.	.	.
chr1	221508607	221508774	168	221508720	21.45	20.1926	10.4403	15.3615	FTE2_peak_427	chr1_221508607_221508774	C1orf140	.	.
chr1	221613372	221613659	288	221613534	13.31	10.6011	6.68542	6.55065	FTE2_peak_428	chr1_221613372_221613659	.	.	.
chr1	221891871	221892308	438	221891979	24.4	11.8043	5.08096	7.60192	FTE2_peak_429	chr1_221891871_221892308	DUSP10	.	.
chr1	222042407	222042753	347	222042466	14.79	11.7222	7.37634	7.52556	FTE2_peak_430	chr1_222042407_222042753	.	.	.
chr1	222043214	222043381	168	222043257	13.31	5.46828	3.57793	2.08579	FTE2_peak_431	chr1_222043214_222043381	.	.	.
chr1	222065179	222065497	319	222065265	18.49	12.1886	6.49616	7.97106	FTE2_peak_432	chr1_222065179_222065497	.	.	.
chr1	222131536	222131720	185	222131620	14.05	11.7222	7.03088	7.52556	FTE2_peak_433	chr1_222131536_222131720	.	.	.
chr1	222164616	222164773	158	222164702	12.57	9.5096	6.33996	5.56248	FTE2_peak_434	chr1_222164616_222164773	.	.	.
chr1	222217507	222217621	115	222217561	11.09	8.44993	5.64904	4.59841	FTE2_peak_435	chr1_222217507_222217621	.	.	.
chr1	222544736	222544851	116	222544849	10.35	7.42451	5.30358	3.76232	FTE2_peak_436	chr1_222544736_222544851	.	.	.
chr1	223403602	223403807	206	223403786	11.83	5.86499	4.27754	2.42626	FTE2_peak_437	chr1_223403602_223403807	SUSD4	.	.
chr1	224075860	224076056	197	224076055	13.31	5.46828	3.57793	2.08579	FTE2_peak_438	chr1_224075860_224076056	.	.	.
chr1	224235378	224235549	172	224235476	21.45	19.3297	9.91022	14.534	FTE2_peak_439	chr1_224235378_224235549	.	.	.
chr1	224267900	224268040	141	224267964	11.83	8.44993	5.9945	4.59841	FTE2_peak_440	chr1_224267900_224268040	.	.	.
chr1	224730639	224730800	162	224730734	11.83	8.44993	5.9945	4.59841	FTE2_peak_441	chr1_224730639_224730800	.	.	.
chr1	224752892	224753049	158	224753023	21.45	15.2574	7.48222	10.7466	FTE2_peak_442	chr1_224752892_224753049	.	.	.
chr1	225441588	225441713	126	225441648	14.79	8.41215	5.2636	4.59841	FTE2_peak_443	chr1_225441588_225441713	DNAH14	.	.
chr1	225695410	225695529	120	225695448	12.57	9.5096	6.33996	5.56248	FTE2_peak_444	chr1_225695410_225695529	ENAH	.	.
chr1	225888022	225888278	257	225888104	14.05	10.7809	6.44869	6.72599	FTE2_peak_445	chr1_225888022_225888278	.	.	.
chr1	226285763	226285888	126	226285835	14.79	11.1538	7.00723	7.07968	FTE2_peak_446	chr1_226285763_226285888	.	H3F3A;H3F3AP4	.
chr1	226966356	226966485	130	226966408	11.09	8.41146	5.62469	4.59841	FTE2_peak_447	chr1_226966356_226966485	.	.	.
chr1	230240369	230240767	399	230240646	21.45	20.2661	10.4855	15.4078	FTE2_peak_448	chr1_230240369_230240767	GALNT2	.	.
chr1	230985267	230985444	178	230985341	17.75	11.2084	6.24965	7.11989	FTE2_peak_449	chr1_230985267_230985444	C1orf198	.	.
chr1	231275792	231275929	138	231275868	17.75	14.3568	8.19447	9.96174	FTE2_peak_450	chr1_231275792_231275929	.	.	TRIM67
chr1	231276163	231276360	198	231276252	16.27	12.9695	7.39926	8.67842	FTE2_peak_451	chr1_231276163_231276360	.	.	TRIM67
chr1	231494938	231495052	115	231495030	11.83	8.44993	5.9945	4.59841	FTE2_peak_452	chr1_231494938_231495052	.	C1orf124;EXOC8	EGLN1
chr1	231953595	231953784	190	231953689	11.09	8.41146	5.62469	4.59841	FTE2_peak_453	chr1_231953595_231953784	DISC1;DISC2;TSNAX-DISC1	.	.
chr1	231963119	231963687	569	231963253	48.07	40.6812	12.2675	35.0165	FTE2_peak_454	chr1_231963119_231963687	DISC1;TSNAX-DISC1	DISC2	.
chr1	231964057	231964178	122	231964142	13.31	10.6011	6.68542	6.55065	FTE2_peak_455	chr1_231964057_231964178	DISC1;TSNAX-DISC1	DISC2	.
chr1	232285696	232285850	155	232285779	14.05	11.7222	7.03088	7.52556	FTE2_peak_456	chr1_232285696_232285850	.	.	.
chr1	233210938	233211060	123	233211028	13.31	7.97574	5.03934	4.27299	FTE2_peak_457	chr1_233210938_233211060	PCNXL2	.	.
chr1	233248707	233249090	384	233248892	32.54	35.1461	15.4348	29.6522	FTE2_peak_458	chr1_233248707_233249090	PCNXL2	.	.
chr1	234700559	234700712	154	234700621	19.23	17.7137	9.4491	13.001	FTE2_peak_459	chr1_234700559_234700712	.	.	.
chr1	234859763	234859895	133	234859787	16.27	8.73159	4.89231	4.86939	FTE2_peak_460	chr1_234859763_234859895	LOC100506810	.	.
chr1	235061790	235061911	122	235061843	17.75	15.0408	8.62814	10.6168	FTE2_peak_461	chr1_235061790_235061911	.	.	.
chr1	235116669	235116783	115	235116719	12.57	8.97564	5.99213	5.10349	FTE2_peak_462	chr1_235116669_235116783	.	.	.
chr1	235123272	235123395	124	235123317	15.53	11.8072	7.04768	7.60464	FTE2_peak_463	chr1_235123272_235123395	.	.	.
chr1	235904761	235904887	127	235904813	15.53	12.871	7.7218	8.58244	FTE2_peak_464	chr1_235904761_235904887	LYST	.	.
chr1	237068493	237068689	197	237068685	9.61	6.43625	4.95812	2.89558	FTE2_peak_465	chr1_237068493_237068689	.	MTR	.
chr1	238817095	238817392	298	238817136	12.57	9.5096	6.33996	5.56248	FTE2_peak_466	chr1_238817095_238817392	.	.	.
chr1	240193617	240193750	134	240193658	10.35	7.42451	5.30358	3.76232	FTE2_peak_467	chr1_240193617_240193750	.	RPS7P5	.
chr1	240194415	240194639	225	240194556	19.23	13.1909	6.74268	8.88208	FTE2_peak_468	chr1_240194415_240194639	.	RPS7P5	.
chr1	240395811	240396035	225	240395977	17.01	15.1862	8.37647	10.7426	FTE2_peak_469	chr1_240395811_240396035	FMN2	.	.
chr1	240406290	240406414	125	240406360	14.05	11.5535	6.92649	7.45249	FTE2_peak_470	chr1_240406290_240406414	FMN2	.	.
chr1	240448935	240449140	206	240449012	11.83	8.44993	5.9945	4.59841	FTE2_peak_471	chr1_240448935_240449140	FMN2	.	.
chr1	240514395	240514589	195	240514489	11.09	8.44993	5.64904	4.59841	FTE2_peak_472	chr1_240514395_240514589	FMN2	.	.
chr1	240549825	240549964	140	240549888	14.79	11.3787	7.15325	7.28282	FTE2_peak_473	chr1_240549825_240549964	FMN2	.	.
chr1	240577173	240577333	161	240577265	19.97	16.0911	8.76754	11.5522	FTE2_peak_474	chr1_240577173_240577333	FMN2	.	.
chr1	240929131	240929264	134	240929195	14.05	9.46224	5.64246	5.56248	FTE2_peak_475	chr1_240929131_240929264	.	.	RGS7
chr1	240967860	240968008	149	240967961	22.93	16.3197	7.97524	11.7609	FTE2_peak_476	chr1_240967860_240968008	RGS7	.	.
chr1	240973589	240973703	115	240973636	11.83	8.44993	5.9945	4.59841	FTE2_peak_477	chr1_240973589_240973703	RGS7	.	.
chr1	240994481	240994736	256	240994682	15.53	12.871	7.7218	8.58244	FTE2_peak_478	chr1_240994481_240994736	RGS7	.	.
chr1	241646210	241646484	275	241646305	17.01	15.2456	8.41272	10.7426	FTE2_peak_479	chr1_241646210_241646484	.	.	FH
chr1	241776183	241776318	136	241776210	10.35	7.34654	5.25263	3.74831	FTE2_peak_480	chr1_241776183_241776318	OPN3	KMO	CHML
chr1	243376725	243376852	128	243376819	9.61	6.43625	4.95812	2.89558	FTE2_peak_481	chr1_243376725_243376852	CEP170	.	.
chr1	243435405	243435529	125	243435490	16.27	14.046	8.06726	9.66458	FTE2_peak_482	chr1_243435405_243435529	SDCCAG8	CEP170	.
chr1	243713666	243713963	298	243713804	22.19	16.0052	7.5525	11.4705	FTE2_peak_483	chr1_243713666_243713963	AKT3	.	.
chr1	243759741	243759870	130	243759821	14.79	6.17368	3.9477	2.71417	FTE2_peak_484	chr1_243759741_243759870	AKT3	.	.
chr1	243787301	243787554	254	243787367	12.57	9.5096	6.33996	5.56248	FTE2_peak_485	chr1_243787301_243787554	AKT3	.	.
chr1	243882235	243882525	291	243882346	22.19	16.3197	7.72873	11.7609	FTE2_peak_486	chr1_243882235_243882525	AKT3	.	.
chr1	244087924	244088306	383	244088002	15.53	9.31879	5.51011	5.42449	FTE2_peak_487	chr1_244087924_244088306	LOC339529	.	.
chr1	244090150	244090443	294	244090338	16.27	12.299	6.98619	8.07263	FTE2_peak_488	chr1_244090150_244090443	LOC339529	.	.
chr1	244267582	244267942	361	244267845	19.23	17.4847	9.3088	12.8437	FTE2_peak_489	chr1_244267582_244267942	.	.	.
chr1	244276161	244276280	120	244276195	11.09	8.44993	5.64904	4.59841	FTE2_peak_490	chr1_244276161_244276280	.	.	.
chr1	244437155	244437299	145	244437224	14.05	11.7222	7.03088	7.52556	FTE2_peak_491	chr1_244437155_244437299	.	.	.
chr1	246044333	246044552	220	246044442	12.57	9.5096	6.33996	5.56248	FTE2_peak_492	chr1_246044333_246044552	SMYD3	.	.
chr1	246303067	246303309	243	246303109	11.83	8.44993	5.9945	4.59841	FTE2_peak_493	chr1_246303067_246303309	SMYD3	.	.
chr1	246598994	246599131	138	246599068	16.27	14.046	8.06726	9.66458	FTE2_peak_494	chr1_246598994_246599131	SMYD3	.	.
chr1	246599405	246599527	123	246599433	11.09	8.44993	5.64904	4.59841	FTE2_peak_495	chr1_246599405_246599527	SMYD3	.	.
chr1	246756120	246756240	121	246756207	14.79	10.5787	6.63479	6.55065	FTE2_peak_496	chr1_246756120_246756240	CNST	TFB2M	.
chr1	249115352	249115576	225	249115454	11.83	8.18008	5.8132	4.46758	FTE2_peak_497	chr1_249115352_249115576	SH3BP5L	.	MIR3124;ZNF672;ZNF692
chr10	3494480	3494594	115	3494527	14.05	11.7222	7.03088	7.52556	FTE2_peak_498	chr10_3494480_3494594	.	.	.
chr10	3495287	3495457	171	3495448	12.57	6.6833	4.52406	3.12007	FTE2_peak_499	chr10_3495287_3495457	.	.	.
chr10	3510411	3510525	115	3510466	15.53	10.944	6.50544	6.88343	FTE2_peak_500	chr10_3510411_3510525	.	.	.
chr10	3782805	3782944	140	3782878	12.57	9.36507	6.24582	5.46895	FTE2_peak_501	chr10_3782805_3782944	.	.	.
chr10	3817458	3817997	540	3817840	17.01	15.2456	8.41272	10.7426	FTE2_peak_502	chr10_3817458_3817997	.	.	KLF6
chr10	3818885	3819153	269	3819138	11.09	7.146	4.82469	3.55857	FTE2_peak_503	chr10_3818885_3819153	KLF6	.	.
chr10	3847493	3847692	200	3847659	11.83	6.29259	4.55543	2.82421	FTE2_peak_504	chr10_3847493_3847692	.	KLF6	.
chr10	3848083	3848197	115	3848171	14.05	8.85475	5.27836	4.98972	FTE2_peak_505	chr10_3848083_3848197	.	KLF6	.
chr10	4285972	4286149	178	4286075	19.23	7.99138	4.04561	4.28737	FTE2_peak_506	chr10_4285972_4286149	.	.	.
chr10	4414930	4415076	147	4415024	14.79	11.7222	7.37634	7.52556	FTE2_peak_507	chr10_4414930_4415076	.	.	.
chr10	4569930	4570210	281	4570031	17.75	15.2456	8.75818	10.7426	FTE2_peak_508	chr10_4569930_4570210	.	.	.
chr10	4705593	4705765	173	4705698	13.31	10.6011	6.68542	6.55065	FTE2_peak_509	chr10_4705593_4705765	LOC100216001	LOC338588	.
chr10	4746582	4746776	195	4746622	13.31	10.4445	6.58615	6.44984	FTE2_peak_510	chr10_4746582_4746776	.	LOC100216001	.
chr10	6790942	6791273	332	6791176	18.49	16.4686	9.10364	11.8693	FTE2_peak_511	chr10_6790942_6791273	.	.	.
chr10	6821079	6821223	145	6821133	14.79	11.7222	7.37634	7.52556	FTE2_peak_512	chr10_6821079_6821223	.	.	LOC100507127
chr10	9054337	9054646	310	9054484	34.02	38.4942	16.3583	32.8823	FTE2_peak_513	chr10_9054337_9054646	.	.	.
chr10	9060426	9060540	115	9060498	14.05	11.7222	7.03088	7.52556	FTE2_peak_514	chr10_9060426_9060540	.	.	.
chr10	9240719	9240837	119	9240783	11.83	8.44993	5.9945	4.59841	FTE2_peak_515	chr10_9240719_9240837	.	.	.
chr10	9331900	9332076	177	9331973	13.31	10.6011	6.68542	6.55065	FTE2_peak_516	chr10_9331900_9332076	.	.	.
chr10	9676494	9676692	199	9676594	13.31	10.6011	6.68542	6.55065	FTE2_peak_517	chr10_9676494_9676692	.	.	.
chr10	9804945	9805208	264	9805083	32.54	35.5322	15.6674	30.0207	FTE2_peak_518	chr10_9804945_9805208	.	.	.
chr10	9805403	9805552	150	9805496	12.57	9.5096	6.33996	5.56248	FTE2_peak_519	chr10_9805403_9805552	.	.	.
chr10	10827727	10827896	170	10827809	14.79	11.7222	7.37634	7.52556	FTE2_peak_520	chr10_10827727_10827896	SFTA1P	.	.
chr10	10828073	10828596	524	10828440	21.45	20.2661	10.4855	15.4078	FTE2_peak_521	chr10_10828073_10828596	SFTA1P	.	.
chr10	10866553	10866693	141	10866648	14.79	10.1038	6.32897	6.12882	FTE2_peak_522	chr10_10866553_10866693	.	SFTA1P	.
chr10	10914045	10914208	164	10914097	9.61	6.43625	4.95812	2.89558	FTE2_peak_523	chr10_10914045_10914208	.	.	.
chr10	13755091	13755236	146	13755132	20.71	16.4023	8.54274	11.8415	FTE2_peak_524	chr10_13755091_13755236	FRMD4A	.	.
chr10	13908227	13908436	210	13908306	19.23	7.99138	4.04561	4.28737	FTE2_peak_525	chr10_13908227_13908436	FRMD4A	.	.
chr10	13992107	13992226	120	13992175	17.75	8.44714	4.68724	4.59841	FTE2_peak_526	chr10_13992107_13992226	FRMD4A	.	.
chr10	14026714	14026848	135	14026800	15.53	6.70967	4.02688	3.14614	FTE2_peak_527	chr10_14026714_14026848	FRMD4A	.	.
chr10	15242662	15242981	320	15242887	34.76	20.6283	7.15167	15.7569	FTE2_peak_528	chr10_15242662_15242981	.	.	FAM171A1
chr10	17101117	17101329	213	17101216	13.31	10.6011	6.68542	6.55065	FTE2_peak_529	chr10_17101117_17101329	CUBN	.	.
chr10	17117604	17117831	228	17117732	14.05	6.17368	3.76281	2.71417	FTE2_peak_530	chr10_17117604_17117831	CUBN	.	.
chr10	17255971	17256164	194	17255980	9.61	6.43625	4.95812	2.89558	FTE2_peak_531	chr10_17255971_17256164	.	TRDMT1	VIM
chr10	17279727	17279862	136	17279763	11.83	8.44993	5.9945	4.59841	FTE2_peak_532	chr10_17279727_17279862	.	VIM	.
chr10	17279954	17280967	1014	17280546	25.14	19.6141	8.71478	14.8002	FTE2_peak_533	chr10_17279954_17280967	.	VIM	.
chr10	17281131	17281274	144	17281184	9.61	6.43625	4.95812	2.89558	FTE2_peak_534	chr10_17281131_17281274	.	VIM	.
chr10	17546860	17547131	272	17546931	22.19	21.5715	10.8309	16.6194	FTE2_peak_535	chr10_17546860_17547131	.	.	.
chr10	17554488	17554709	222	17554645	15.53	9.31879	5.51011	5.42449	FTE2_peak_536	chr10_17554488_17554709	.	.	.
chr10	17715908	17716029	122	17715949	13.31	10.6011	6.68542	6.55065	FTE2_peak_537	chr10_17715908_17716029	STAM	.	.
chr10	19026241	19026384	144	19026342	16.27	13.4595	7.70289	9.13745	FTE2_peak_538	chr10_19026241_19026384	.	.	.
chr10	19026702	19026850	149	19026729	10.35	7.13841	5.11652	3.55148	FTE2_peak_539	chr10_19026702_19026850	.	.	.
chr10	19027791	19027906	116	19027896	12.57	6.6833	4.52406	3.12007	FTE2_peak_540	chr10_19027791_19027906	.	.	.
chr10	19207547	19207753	207	19207649	17.01	15.2456	8.41272	10.7426	FTE2_peak_541	chr10_19207547_19207753	.	.	.
chr10	19927603	19927719	117	19927626	9.61	6.2524	4.83334	2.78775	FTE2_peak_542	chr10_19927603_19927719	.	.	.
chr10	21291150	21291347	198	21291154	13.31	5.46828	3.57793	2.08579	FTE2_peak_543	chr10_21291150_21291347	NEBL	.	.
chr10	21581740	21582040	301	21581854	22.93	19.0172	9.58947	14.2296	FTE2_peak_544	chr10_21581740_21582040	.	.	.
chr10	22215888	22216186	299	22215986	18.49	16.4686	9.10364	11.8693	FTE2_peak_545	chr10_22215888_22216186	DNAJC1	.	.
chr10	22216388	22216733	346	22216663	16.27	14.046	8.06726	9.66458	FTE2_peak_546	chr10_22216388_22216733	DNAJC1	.	.
chr10	22535968	22536173	206	22536020	13.31	9.40355	5.9274	5.50669	FTE2_peak_547	chr10_22535968_22536173	.	.	LOC100130992
chr10	23027677	23027791	115	23027747	14.05	11.0989	6.64514	7.02758	FTE2_peak_548	chr10_23027677_23027791	.	PIP4K2A	.
chr10	23114023	23114137	115	23114087	13.31	10.6011	6.68542	6.55065	FTE2_peak_549	chr10_23114023_23114137	.	.	.
chr10	24721760	24721884	125	24721810	11.09	8.22538	5.50687	4.51008	FTE2_peak_550	chr10_24721760_24721884	KIAA1217	.	.
chr10	24733393	24733507	115	24733435	9.61	6.43625	4.95812	2.89558	FTE2_peak_551	chr10_24733393_24733507	KIAA1217	.	.
chr10	25147253	25147438	186	25147342	19.23	17.7137	9.4491	13.001	FTE2_peak_552	chr10_25147253_25147438	PRTFDC1	.	.
chr10	25186360	25186525	166	25186441	14.05	11.7222	7.03088	7.52556	FTE2_peak_553	chr10_25186360_25186525	PRTFDC1	.	.
chr10	25247103	25247252	150	25247160	13.31	10.6011	6.68542	6.55065	FTE2_peak_554	chr10_25247103_25247252	.	PRTFDC1	ENKUR
chr10	25350954	25351146	193	25351092	9.61	6.40474	4.93675	2.89558	FTE2_peak_555	chr10_25350954_25351146	.	.	.
chr10	28569752	28569915	164	28569827	19.23	14.3624	7.42313	9.96586	FTE2_peak_556	chr10_28569752_28569915	MPP7	.	.
chr10	29425494	29425639	146	29425591	11.09	8.44993	5.64904	4.59841	FTE2_peak_557	chr10_29425494_29425639	.	.	.
chr10	29430016	29430282	267	29430125	21.45	15.2574	7.48222	10.7466	FTE2_peak_558	chr10_29430016_29430282	.	.	.
chr10	29430823	29430966	144	29430865	17.75	14.4883	8.27768	10.0831	FTE2_peak_559	chr10_29430823_29430966	.	.	.
chr10	29546431	29546587	157	29546434	12.57	6.6833	4.52406	3.12007	FTE2_peak_560	chr10_29546431_29546587	.	.	.
chr10	29947939	29948368	430	29948027	17.75	13.2766	7.51461	8.96299	FTE2_peak_561	chr10_29947939_29948368	SVIL	.	.
chr10	30007975	30008173	199	30008066	20.71	18.0882	9.58371	13.3653	FTE2_peak_562	chr10_30007975_30008173	SVIL	.	.
chr10	30093013	30093294	282	30093232	14.79	8.41215	5.2636	4.59841	FTE2_peak_563	chr10_30093013_30093294	.	.	.
chr10	30184491	30184612	122	30184573	14.05	11.7222	7.03088	7.52556	FTE2_peak_564	chr10_30184491_30184612	.	.	.
chr10	30238358	30238704	347	30238486	25.14	24.9811	11.8434	19.8748	FTE2_peak_565	chr10_30238358_30238704	.	.	.
chr10	30246852	30246997	146	30246939	15.53	12.871	7.7218	8.58244	FTE2_peak_566	chr10_30246852_30246997	.	.	.
chr10	30743766	30744036	271	30743864	19.23	17.7137	9.4491	13.001	FTE2_peak_567	chr10_30743766_30744036	MAP3K8	.	.
chr10	31102830	31102976	147	31102905	17.01	13.5597	7.38848	9.23538	FTE2_peak_568	chr10_31102830_31102976	.	.	.
chr10	31550656	31550787	132	31550725	10.35	7.42451	5.30358	3.76232	FTE2_peak_569	chr10_31550656_31550787	.	.	.
chr10	32229840	32230036	197	32229913	17.01	13.0586	7.08753	8.76556	FTE2_peak_570	chr10_32229840_32230036	.	ARHGAP12	.
chr10	32667828	32667983	156	32667905	12.57	9.5096	6.33996	5.56248	FTE2_peak_571	chr10_32667828_32667983	.	.	.
chr10	33271366	33271574	209	33271468	19.23	13.1909	6.74268	8.88208	FTE2_peak_572	chr10_33271366_33271574	.	ITGB1	.
chr10	33299255	33299422	168	33299328	12.57	8.79241	5.87286	4.92833	FTE2_peak_573	chr10_33299255_33299422	.	.	.
chr10	33355915	33356082	168	33355981	15.53	12.7541	7.64762	8.50811	FTE2_peak_574	chr10_33355915_33356082	.	.	.
chr10	33526980	33527216	237	33527114	22.93	21.5715	11.1764	16.6194	FTE2_peak_575	chr10_33526980_33527216	NRP1	.	.
chr10	33527671	33527848	178	33527823	11.83	8.44993	5.9945	4.59841	FTE2_peak_576	chr10_33527671_33527848	NRP1	.	.
chr10	33553190	33553385	196	33553313	14.79	9.66758	6.05011	5.71251	FTE2_peak_577	chr10_33553190_33553385	NRP1	.	.
chr10	33666515	33666700	186	33666677	13.31	9.53979	6.01332	5.58999	FTE2_peak_578	chr10_33666515_33666700	.	.	.
chr10	33831757	33831906	150	33831838	12.57	9.5096	6.33996	5.56248	FTE2_peak_579	chr10_33831757_33831906	.	.	.
chr10	34569636	34569843	208	34569716	13.31	10.5556	6.65661	6.55065	FTE2_peak_580	chr10_34569636_34569843	PARD3	.	.
chr10	34845599	34845714	116	34845617	14.79	8.41215	5.2636	4.59841	FTE2_peak_581	chr10_34845599_34845714	PARD3	.	.
chr10	35294868	35295018	151	35294915	17.75	11.2084	6.24965	7.11989	FTE2_peak_582	chr10_35294868_35295018	.	.	CUL2
chr10	35347170	35347407	238	35347314	14.05	11.0989	6.64514	7.02758	FTE2_peak_583	chr10_35347170_35347407	CUL2	.	.
chr10	35710532	35710701	170	35710630	14.79	11.7222	7.37634	7.52556	FTE2_peak_584	chr10_35710532_35710701	CCNY	.	.
chr10	36079079	36079202	124	36079110	12.57	9.5096	6.33996	5.56248	FTE2_peak_585	chr10_36079079_36079202	.	.	.
chr10	36189481	36189596	116	36189521	14.05	11.7222	7.03088	7.52556	FTE2_peak_586	chr10_36189481_36189596	.	.	.
chr10	36199282	36199400	119	36199323	17.01	15.2456	8.41272	10.7426	FTE2_peak_587	chr10_36199282_36199400	.	.	.
chr10	36461126	36461269	144	36461186	14.79	11.7222	7.37634	7.52556	FTE2_peak_588	chr10_36461126_36461269	.	.	.
chr10	36823717	36823837	121	36823768	11.09	8.27115	5.53586	4.55397	FTE2_peak_589	chr10_36823717_36823837	.	.	.
chr10	36896970	36897160	191	36896989	10.35	7.30401	5.22483	3.70722	FTE2_peak_590	chr10_36896970_36897160	.	.	.
chr10	36897251	36897587	337	36897376	21.45	20.2661	10.4855	15.4078	FTE2_peak_591	chr10_36897251_36897587	.	.	.
chr10	44338953	44339079	127	44338988	11.09	8.41146	5.62469	4.59841	FTE2_peak_592	chr10_44338953_44339079	.	.	C10orf136;LOC100506835
chr10	44353143	44353288	146	44353203	17.01	15.2456	8.41272	10.7426	FTE2_peak_593	chr10_44353143_44353288	.	C10orf136	LOC100506835
chr10	44359480	44359673	194	44359580	16.27	9.67355	5.42225	5.71795	FTE2_peak_594	chr10_44359480_44359673	LOC100506835	C10orf136	.
chr10	44384108	44384289	182	44384112	15.53	9.31879	5.51011	5.42449	FTE2_peak_595	chr10_44384108_44384289	LOC100506835	.	LOC283033
chr10	44387577	44387733	157	44387670	11.09	8.44993	5.64904	4.59841	FTE2_peak_596	chr10_44387577_44387733	LOC100506835	.	LOC283033
chr10	44426832	44426979	148	44426895	25.88	15.4524	6.72097	10.9356	FTE2_peak_597	chr10_44426832_44426979	LOC283033	.	.
chr10	45065064	45065308	245	45065201	15.53	11.1359	6.62538	7.06241	FTE2_peak_598	chr10_45065064_45065308	.	.	.
chr10	45124535	45124649	115	45124542	11.83	8.047	5.72374	4.34061	FTE2_peak_599	chr10_45124535_45124649	.	.	.
chr10	45493978	45494109	132	45494059	14.05	9.18765	5.47717	5.30762	FTE2_peak_600	chr10_45493978_45494109	C10orf25	C10orf10;RASSF4	ZNF22
chr10	47085510	47085626	117	47085592	19.97	8.56217	4.46927	4.70523	FTE2_peak_601	chr10_47085510_47085626	BMS1P1;BMS1P5;PPYR1;PTPN20A;PTPN20B	.	LOC643650
chr10	49814279	49814393	115	49814329	11.83	6.87361	4.93848	3.30112	FTE2_peak_602	chr10_49814279_49814393	ARHGAP22;FAM21B	.	.
chr10	49814733	49815227	495	49815126	28.1	26.4174	11.6108	21.2462	FTE2_peak_603	chr10_49814733_49815227	ARHGAP22;FAM21B	.	.
chr10	50760385	50760622	238	50760461	19.97	10.0802	5.24189	6.10878	FTE2_peak_604	chr10_50760385_50760622	FAM21B	ERCC6;PGBD3	.
chr10	52153604	52153819	216	52153709	13.31	5.46828	3.57793	2.08579	FTE2_peak_605	chr10_52153604_52153819	SGMS1	.	.
chr10	52346465	52346584	120	52346529	10.35	7.42451	5.30358	3.76232	FTE2_peak_606	chr10_52346465_52346584	SGMS1	.	.
chr10	52760003	52760176	174	52760048	14.05	11.7222	7.03088	7.52556	FTE2_peak_607	chr10_52760003_52760176	PRKG1	.	.
chr10	52869676	52869820	145	52869730	14.79	11.3787	7.15325	7.28282	FTE2_peak_608	chr10_52869676_52869820	PRKG1	.	.
chr10	53149577	53149799	223	53149681	19.23	17.7137	9.4491	13.001	FTE2_peak_609	chr10_53149577_53149799	PRKG1	.	.
chr10	54078893	54079149	257	54079038	11.83	8.31742	5.90549	4.59841	FTE2_peak_610	chr10_54078893_54079149	.	DKK1;LOC100506939;PRKG1	.
chr10	54203590	54203799	210	54203687	14.79	11.7222	7.37634	7.52556	FTE2_peak_611	chr10_54203590_54203799	.	.	.
chr10	54301025	54301223	199	54301133	15.53	12.871	7.7218	8.58244	FTE2_peak_612	chr10_54301025_54301223	.	.	.
chr10	59917222	59917432	211	59917329	14.79	8.41215	5.2636	4.59841	FTE2_peak_613	chr10_59917222_59917432	.	.	.
chr10	60198224	60198374	151	60198283	22.19	16.3197	7.72873	11.7609	FTE2_peak_614	chr10_60198224_60198374	.	.	.
chr10	60401014	60401232	219	60401055	10.35	7.42451	5.30358	3.76232	FTE2_peak_615	chr10_60401014_60401232	BICC1	.	.
chr10	60401554	60401780	227	60401662	17.75	15.2456	8.75818	10.7426	FTE2_peak_616	chr10_60401554_60401780	BICC1	.	.
chr10	60421222	60421346	125	60421253	14.79	11.6732	7.34455	7.52556	FTE2_peak_617	chr10_60421222_60421346	BICC1	.	.
chr10	60422156	60422475	320	60422244	14.79	11.7222	7.37634	7.52556	FTE2_peak_618	chr10_60422156_60422475	BICC1	.	.
chr10	61147863	61148109	247	61148024	18.49	9.25272	4.87212	5.36966	FTE2_peak_619	chr10_61147863_61148109	.	FAM13C	.
chr10	62042767	62042943	177	62042788	9.61	6.43625	4.95812	2.89558	FTE2_peak_620	chr10_62042767_62042943	ANK3	.	.
chr10	62043205	62043354	150	62043253	8.87	5.48854	4.61266	2.08579	FTE2_peak_621	chr10_62043205_62043354	ANK3	.	.
chr10	62144595	62144817	223	62144709	16.27	14.046	8.06726	9.66458	FTE2_peak_622	chr10_62144595_62144817	ANK3	.	.
chr10	62674708	62674903	196	62674793	14.05	11.7222	7.03088	7.52556	FTE2_peak_623	chr10_62674708_62674903	RHOBTB1	.	.
chr10	62722829	62722967	139	62722885	12.57	9.5096	6.33996	5.56248	FTE2_peak_624	chr10_62722829_62722967	RHOBTB1	.	.
chr10	63388633	63388885	253	63388821	18.49	11.5345	6.11883	7.43494	FTE2_peak_625	chr10_63388633_63388885	.	.	.
chr10	63393523	63393720	198	63393607	18.49	9.25272	4.87212	5.36966	FTE2_peak_626	chr10_63393523_63393720	.	.	C10orf107
chr10	63592680	63592894	215	63592772	17.01	15.2456	8.41272	10.7426	FTE2_peak_627	chr10_63592680_63592894	.	.	.
chr10	63597052	63597196	145	63597160	17.75	8.44714	4.68724	4.59841	FTE2_peak_628	chr10_63597052_63597196	.	.	.
chr10	63702822	63702992	171	63702915	11.09	8.44993	5.64904	4.59841	FTE2_peak_629	chr10_63702822_63702992	ARID5B	.	.
chr10	63809053	63809212	160	63809190	8.87	5.48854	4.61266	2.08579	FTE2_peak_630	chr10_63809053_63809212	ARID5B	.	.
chr10	63810765	63811079	315	63810998	14.79	6.17368	3.9477	2.71417	FTE2_peak_631	chr10_63810765_63811079	ARID5B	.	.
chr10	63853829	63853975	147	63853874	17.01	14.4223	7.91101	10.0227	FTE2_peak_632	chr10_63853829_63853975	ARID5B	.	.
chr10	63993593	63993707	115	63993696	12.57	9.5096	6.33996	5.56248	FTE2_peak_633	chr10_63993593_63993707	RTKN2	.	.
chr10	64083635	64083816	182	64083737	12.57	9.5096	6.33996	5.56248	FTE2_peak_634	chr10_64083635_64083816	.	.	.
chr10	64270919	64271058	140	64270957	10.35	7.42451	5.30358	3.76232	FTE2_peak_635	chr10_64270919_64271058	ZNF365	.	.
chr10	64344156	64344315	160	64344175	11.09	8.44993	5.64904	4.59841	FTE2_peak_636	chr10_64344156_64344315	ZNF365	.	.
chr10	64411205	64411415	211	64411242	12.57	8.12457	5.43975	4.41482	FTE2_peak_637	chr10_64411205_64411415	ZNF365	.	.
chr10	64873925	64874052	128	64873973	19.97	15.5106	8.40383	10.9894	FTE2_peak_638	chr10_64873925_64874052	.	.	NRBF2
chr10	69847229	69847363	135	69847313	17.75	15.2456	8.75818	10.7426	FTE2_peak_639	chr10_69847229_69847363	.	HERC4	MYPN
chr10	69855017	69855162	146	69855093	18.49	12.1886	6.49616	7.97106	FTE2_peak_640	chr10_69855017_69855162	.	HERC4	MYPN
chr10	69865762	69866599	838	69865842	19.23	13.1909	6.74268	8.88208	FTE2_peak_641	chr10_69865762_69866599	MYPN	.	.
chr10	69895821	69896123	303	69895910	13.31	7.53305	4.77057	3.8596	FTE2_peak_642	chr10_69895821_69896123	MYPN	.	.
chr10	69896270	69896525	256	69896405	22.93	12.6839	5.98143	8.44419	FTE2_peak_643	chr10_69896270_69896525	MYPN	.	.
chr10	69913546	69913711	166	69913642	13.31	10.1767	6.41637	6.19967	FTE2_peak_644	chr10_69913546_69913711	MYPN	.	.
chr10	69962795	69962909	115	69962873	11.83	7.5528	5.39186	3.87385	FTE2_peak_645	chr10_69962795_69962909	MYPN	.	ATOH7
chr10	70821215	70821431	217	70821324	28.84	26.7886	12.1285	21.6011	FTE2_peak_646	chr10_70821215_70821431	.	.	SRGN
chr10	70848608	70848902	295	70848769	15.53	11.2342	6.68703	7.14385	FTE2_peak_647	chr10_70848608_70848902	SRGN	.	.
chr10	70865507	70865645	139	70865576	14.05	9.88123	5.89667	5.92097	FTE2_peak_648	chr10_70865507_70865645	.	SRGN	VPS26A
chr10	71463489	71463913	425	71463690	23.67	22.8954	11.5219	17.8823	FTE2_peak_649	chr10_71463489_71463913	.	.	.
chr10	71598712	71598843	132	71598764	8.13	5.4605	4.24881	2.08579	FTE2_peak_650	chr10_71598712_71598843	COL13A1	.	.
chr10	71951934	71952049	116	71951952	16.27	12.5147	7.11866	8.2827	FTE2_peak_651	chr10_71951934_71952049	.	SAR1A	PPA1
chr10	74036043	74036806	764	74036311	39.94	22.8551	7.11977	17.8623	FTE2_peak_652	chr10_74036043_74036806	.	DDIT4	.
chr10	74523938	74524341	404	74524124	36.98	41.5051	17.7402	35.7988	FTE2_peak_653	chr10_74523938_74524341	MCU	.	.
chr10	75654371	75654517	147	75654423	13.31	10.2821	6.48322	6.29322	FTE2_peak_654	chr10_75654371_75654517	.	CAMK2G	C10orf55;PLAU
chr10	75659298	75659427	130	75659367	13.31	9.09943	5.73616	5.22244	FTE2_peak_655	chr10_75659298_75659427	.	CAMK2G	C10orf55;PLAU
chr10	75713603	75713718	116	75713662	14.79	8.41215	5.2636	4.59841	FTE2_peak_656	chr10_75713603_75713718	.	.	.
chr10	75815854	75815985	132	75815947	11.09	5.86499	4.03103	2.42626	FTE2_peak_657	chr10_75815854_75815985	VCL	.	.
chr10	75839284	75839591	308	75839488	11.83	8.44993	5.9945	4.59841	FTE2_peak_658	chr10_75839284_75839591	VCL	.	.
chr10	77307098	77307475	378	77307350	28.84	29.7668	13.9401	24.4572	FTE2_peak_659	chr10_77307098_77307475	.	.	.
chr10	77879399	77879565	167	77879552	11.09	5.86499	4.03103	2.42626	FTE2_peak_660	chr10_77879399_77879565	C10orf11	.	.
chr10	78110456	78110586	131	78110480	19.23	10.0802	5.05701	6.10878	FTE2_peak_661	chr10_78110456_78110586	C10orf11	.	.
chr10	78142362	78142514	153	78142423	22.19	18.664	9.08372	13.9164	FTE2_peak_662	chr10_78142362_78142514	C10orf11	.	.
chr10	78318920	78319169	250	78319085	22.93	21.5715	11.1764	16.6194	FTE2_peak_663	chr10_78318920_78319169	.	C10orf11	.
chr10	78343489	78343833	345	78343593	23.67	22.8954	11.5219	17.8823	FTE2_peak_664	chr10_78343489_78343833	.	C10orf11	.
chr10	79061122	79061253	132	79061153	8.13	5.48854	4.2672	2.08579	FTE2_peak_665	chr10_79061122_79061253	KCNMA1	.	.
chr10	79152672	79152798	127	79152709	22.93	14.1913	6.77783	9.80728	FTE2_peak_666	chr10_79152672_79152798	KCNMA1	.	.
chr10	79176220	79176425	206	79176398	16.27	10.2513	5.75662	6.26333	FTE2_peak_667	chr10_79176220_79176425	KCNMA1	.	.
chr10	79176535	79176687	153	79176599	10.35	7.42451	5.30358	3.76232	FTE2_peak_668	chr10_79176535_79176687	KCNMA1	.	.
chr10	79284212	79284487	276	79284381	22.19	16.3197	7.72873	11.7609	FTE2_peak_669	chr10_79284212_79284487	KCNMA1	.	.
chr10	86029649	86029795	147	86029710	15.53	10.6677	6.33346	6.61483	FTE2_peak_670	chr10_86029649_86029795	.	LRIT1;RGR	LOC170425
chr10	89304647	89304767	121	89304718	13.31	10.6011	6.68542	6.55065	FTE2_peak_671	chr10_89304647_89304767	MINPP1	.	.
chr10	89306067	89306269	203	89306141	16.27	14.046	8.06726	9.66458	FTE2_peak_672	chr10_89306067_89306269	MINPP1	.	.
chr10	89500154	89500309	156	89500223	13.31	10.6011	6.68542	6.55065	FTE2_peak_673	chr10_89500154_89500309	PAPSS2	.	ATAD1
chr10	89720276	89720402	127	89720330	11.09	8.44993	5.64904	4.59841	FTE2_peak_674	chr10_89720276_89720402	PTEN	.	.
chr10	89918049	89918163	115	89918142	11.09	8.44993	5.64904	4.59841	FTE2_peak_675	chr10_89918049_89918163	.	.	.
chr10	90260141	90260259	119	90260249	10.35	7.42451	5.30358	3.76232	FTE2_peak_676	chr10_90260141_90260259	RNLS	.	.
chr10	90642452	90642570	119	90642515	19.23	11.6149	5.86405	7.51181	FTE2_peak_677	chr10_90642452_90642570	STAMBPL1	.	.
chr10	91037996	91038156	161	91038093	11.83	8.44993	5.9945	4.59841	FTE2_peak_678	chr10_91037996_91038156	.	LIPA	IFIT2
chr10	91115409	91115523	115	91115433	14.79	8.41215	5.2636	4.59841	FTE2_peak_679	chr10_91115409_91115523	.	IFIT3	IFIT1B
chr10	91134028	91134148	121	91134103	11.83	8.44993	5.9945	4.59841	FTE2_peak_680	chr10_91134028_91134148	.	.	IFIT1;IFIT1B
chr10	91187445	91187697	253	91187552	13.31	10.6011	6.68542	6.55065	FTE2_peak_681	chr10_91187445_91187697	.	IFIT1;IFIT5	SLC16A12
chr10	91275441	91275640	200	91275529	17.01	14.4883	7.95117	10.0831	FTE2_peak_682	chr10_91275441_91275640	SLC16A12	.	.
chr10	91313030	91313399	370	91313199	14.79	11.7222	7.37634	7.52556	FTE2_peak_683	chr10_91313030_91313399	.	SLC16A12	PANK1
chr10	92362641	92362864	224	92362754	17.75	15.2456	8.75818	10.7426	FTE2_peak_684	chr10_92362641_92362864	.	.	.
chr10	92670735	92673249	2515	92671497	26.62	26.9704	12.9037	21.759	FTE2_peak_685	chr10_92670735_92673249	ANKRD1	RPP30	.
chr10	92673950	92674419	470	92674357	13.31	10.6011	6.68542	6.55065	FTE2_peak_686	chr10_92673950_92674419	ANKRD1	RPP30	.
chr10	92674524	92674966	443	92674736	13.31	10.6011	6.68542	6.55065	FTE2_peak_687	chr10_92674524_92674966	ANKRD1	RPP30	.
chr10	92675945	92676354	410	92676209	17.01	15.2456	8.41272	10.7426	FTE2_peak_688	chr10_92675945_92676354	ANKRD1	RPP30	.
chr10	92676792	92677591	800	92676964	17.01	11.2084	6.00314	7.11989	FTE2_peak_689	chr10_92676792_92677591	ANKRD1	RPP30	.
chr10	92677726	92677867	142	92677784	20.71	14.2141	7.2357	9.82357	FTE2_peak_690	chr10_92677726_92677867	ANKRD1	RPP30	.
chr10	92678124	92678402	279	92678314	24.4	24.237	11.8673	19.1558	FTE2_peak_691	chr10_92678124_92678402	ANKRD1	RPP30	.
chr10	92679077	92679953	877	92679534	18.49	16.4686	9.10364	11.8693	FTE2_peak_692	chr10_92679077_92679953	ANKRD1	RPP30	.
chr10	92680231	92680694	464	92680563	14.79	10.5787	6.63479	6.55065	FTE2_peak_693	chr10_92680231_92680694	ANKRD1	RPP30	.
chr10	92680798	92681406	609	92681101	31.06	21.4139	8.01517	16.5168	FTE2_peak_694	chr10_92680798_92681406	ANKRD1	RPP30	.
chr10	92689485	92689663	179	92689596	14.05	10.1038	6.03257	6.12882	FTE2_peak_695	chr10_92689485_92689663	.	ANKRD1;RPP30	.
chr10	92690349	92690497	149	92690407	10.35	7.34654	5.25263	3.74831	FTE2_peak_696	chr10_92690349_92690497	.	ANKRD1;RPP30	.
chr10	92690640	92691313	674	92691008	36.24	41.0705	17.1364	35.3906	FTE2_peak_697	chr10_92690640_92691313	.	ANKRD1;RPP30	.
chr10	92719117	92719234	118	92719192	12.57	9.5096	6.33996	5.56248	FTE2_peak_698	chr10_92719117_92719234	.	.	.
chr10	92728436	92728747	312	92728661	15.53	6.9063	4.13258	3.33144	FTE2_peak_699	chr10_92728436_92728747	.	.	.
chr10	92814100	92814283	184	92814204	18.49	12.1886	6.49616	7.97106	FTE2_peak_700	chr10_92814100_92814283	.	.	.
chr10	92951044	92951178	135	92951112	15.53	9.31879	5.51011	5.42449	FTE2_peak_701	chr10_92951044_92951178	PCGF5	.	.
chr10	93373488	93373608	121	93373563	11.83	8.44993	5.9945	4.59841	FTE2_peak_702	chr10_93373488_93373608	.	LOC100188947	PPP1R3C
chr10	93376814	93376964	151	93376871	19.97	17.7137	9.79456	13.001	FTE2_peak_703	chr10_93376814_93376964	.	LOC100188947	PPP1R3C
chr10	93412104	93412407	304	93412323	17.01	15.2456	8.41272	10.7426	FTE2_peak_704	chr10_93412104_93412407	.	PPP1R3C	.
chr10	93861609	93861723	115	93861684	19.97	10.0802	5.24189	6.10878	FTE2_peak_705	chr10_93861609_93861723	CPEB3	.	.
chr10	94731888	94732178	291	94732093	16.27	7.66459	4.31747	3.98035	FTE2_peak_706	chr10_94731888_94732178	EXOC6	.	.
chr10	95195873	95195994	122	95195952	8.87	5.42605	4.56834	2.08579	FTE2_peak_707	chr10_95195873_95195994	MYOF	.	.
chr10	95230984	95231132	149	95231051	21.45	9.46042	4.48933	5.56136	FTE2_peak_708	chr10_95230984_95231132	MYOF	.	CEP55
chr10	95953342	95953532	191	95953426	15.53	11.6453	6.94552	7.52556	FTE2_peak_709	chr10_95953342_95953532	PLCE1	.	.
chr10	96046859	96047028	170	96046947	13.31	10.6011	6.68542	6.55065	FTE2_peak_710	chr10_96046859_96047028	PLCE1	LOC100128054	.
chr10	97033176	97033375	200	97033323	16.27	13.3334	7.62467	9.0151	FTE2_peak_711	chr10_97033176_97033375	PDLIM1	.	.
chr10	97068580	97068739	160	97068694	14.05	11.7222	7.03088	7.52556	FTE2_peak_712	chr10_97068580_97068739	.	PDLIM1	SORBS1
chr10	98442994	98443122	129	98443022	11.09	8.44993	5.64904	4.59841	FTE2_peak_713	chr10_98442994_98443122	PIK3AP1	.	.
chr10	102650471	102650585	115	102650531	15.53	12.871	7.7218	8.58244	FTE2_peak_714	chr10_102650471_102650585	.	.	FAM178A
chr10	104512389	104512585	197	104512532	15.53	12.3812	7.41104	8.15233	FTE2_peak_715	chr10_104512389_104512585	C10orf26	SFXN2	.
chr10	104990980	104991269	290	104991078	18.49	12.1886	6.49616	7.97106	FTE2_peak_716	chr10_104990980_104991269	.	.	LOC729020
chr10	105264361	105264475	115	105264395	15.53	9.49498	5.61588	5.56248	FTE2_peak_717	chr10_105264361_105264475	NEURL	CALHM3	.
chr10	105869768	105870043	276	105869900	14.79	11.7222	7.37634	7.52556	FTE2_peak_718	chr10_105869768_105870043	.	COL17A1	SFR1;WDR96
chr10	106059938	106060052	115	106060014	17.75	11.2084	6.24965	7.11989	FTE2_peak_719	chr10_106059938_106060052	.	GSTO2	ITPRIP
chr10	110943254	110943474	221	110943325	12.57	9.5096	6.33996	5.56248	FTE2_peak_720	chr10_110943254_110943474	.	.	.
chr10	111816688	111816879	192	111816804	16.27	13.4595	7.70289	9.13745	FTE2_peak_721	chr10_111816688_111816879	ADD3	.	.
chr10	111836762	111836998	237	111836840	11.83	8.44993	5.9945	4.59841	FTE2_peak_722	chr10_111836762_111836998	ADD3	.	.
chr10	112086507	112086622	116	112086540	14.79	8.41215	5.2636	4.59841	FTE2_peak_723	chr10_112086507_112086622	.	SMNDC1	.
chr10	112087045	112087187	143	112087082	15.53	9.49498	5.61588	5.56248	FTE2_peak_724	chr10_112087045_112087187	.	SMNDC1	.
chr10	112113010	112113189	180	112113093	14.79	11.7222	7.37634	7.52556	FTE2_peak_725	chr10_112113010_112113189	.	.	.
chr10	112159088	112159319	232	112159167	14.05	7.91051	4.72567	4.21717	FTE2_peak_726	chr10_112159088_112159319	.	.	.
chr10	112174449	112174720	272	112174638	17.75	13.1124	7.41212	8.81824	FTE2_peak_727	chr10_112174449_112174720	.	.	.
chr10	112672229	112672360	132	112672247	11.83	5.86499	4.27754	2.42626	FTE2_peak_728	chr10_112672229_112672360	BBIP1	MIR4680;PDCD4	RPL13AP6;SHOC2
chr10	112794819	112794957	139	112794870	13.31	10.6011	6.68542	6.55065	FTE2_peak_729	chr10_112794819_112794957	.	SHOC2	.
chr10	113987439	113987762	324	113987524	19.23	17.7137	9.4491	13.001	FTE2_peak_730	chr10_113987439_113987762	.	.	.
chr10	113988964	113989082	119	113989062	12.57	9.5096	6.33996	5.56248	FTE2_peak_731	chr10_113988964_113989082	.	.	.
chr10	114523963	114524205	243	114524032	13.31	10.6011	6.68542	6.55065	FTE2_peak_732	chr10_114523963_114524205	VTI1A	.	.
chr10	114816356	114816475	120	114816383	10.35	7.42451	5.30358	3.76232	FTE2_peak_733	chr10_114816356_114816475	TCF7L2	.	.
chr10	115086148	115086325	178	115086183	13.31	7.35199	4.6618	3.75278	FTE2_peak_734	chr10_115086148_115086325	.	.	.
chr10	115786284	115786578	295	115786381	14.05	11.7222	7.03088	7.52556	FTE2_peak_735	chr10_115786284_115786578	.	.	ADRB1
chr10	116031573	116031730	158	116031668	11.09	8.31742	5.56516	4.59841	FTE2_peak_736	chr10_116031573_116031730	VWA2	.	AFAP1L2
chr10	116408234	116408415	182	116408311	14.79	11.7222	7.37634	7.52556	FTE2_peak_737	chr10_116408234_116408415	ABLIM1	.	.
chr10	116585545	116585823	279	116585749	17.75	8.44714	4.68724	4.59841	FTE2_peak_738	chr10_116585545_116585823	FAM160B1	.	.
chr10	116616483	116616739	257	116616684	8.87	5.48854	4.61266	2.08579	FTE2_peak_739	chr10_116616483_116616739	FAM160B1	.	.
chr10	116685594	116685874	281	116685775	22.19	21.5715	10.8309	16.6194	FTE2_peak_740	chr10_116685594_116685874	.	FAM160B1	TRUB1
chr10	117705728	117705875	148	117705811	16.27	14.046	8.06726	9.66458	FTE2_peak_741	chr10_117705728_117705875	ATRNL1	.	.
chr10	117706639	117706968	330	117706806	17.75	15.2456	8.75818	10.7426	FTE2_peak_742	chr10_117706639_117706968	ATRNL1	.	.
chr10	117797973	117798089	117	117798042	14.05	11.7222	7.03088	7.52556	FTE2_peak_743	chr10_117797973_117798089	.	.	GFRA1
chr10	117804351	117804474	124	117804395	11.09	8.44993	5.64904	4.59841	FTE2_peak_744	chr10_117804351_117804474	.	.	GFRA1
chr10	120133167	120133295	129	120133185	9.61	6.43625	4.95812	2.89558	FTE2_peak_745	chr10_120133167_120133295	.	.	.
chr10	120873431	120873583	153	120873499	21.45	15.7176	7.7469	11.1896	FTE2_peak_746	chr10_120873431_120873583	FAM45A	.	SFXN4
chr10	121006760	121006877	118	121006796	11.83	8.44993	5.9945	4.59841	FTE2_peak_747	chr10_121006760_121006877	GRK5	.	.
chr10	121013227	121013390	164	121013325	21.45	7.73977	3.74111	4.05364	FTE2_peak_748	chr10_121013227_121013390	GRK5	.	.
chr10	121567654	121567768	115	121567660	8.87	5.48854	4.61266	2.08579	FTE2_peak_749	chr10_121567654_121567768	INPP5F	.	MCMBP
chr10	121609040	121609212	173	121609108	22.19	12.6839	5.79655	8.44419	FTE2_peak_750	chr10_121609040_121609212	MCMBP	INPP5F	.
chr10	122175606	122175725	120	122175644	14.79	11.7222	7.37634	7.52556	FTE2_peak_751	chr10_122175606_122175725	.	.	.
chr10	122268071	122268185	115	122268087	9.61	6.43625	4.95812	2.89558	FTE2_peak_752	chr10_122268071_122268185	PPAPDC1A	.	.
chr10	124228472	124228983	512	124228678	40.67	31.2332	10.4187	25.8741	FTE2_peak_753	chr10_124228472_124228983	HTRA1	ARMS2	.
chr10	126595245	126595492	248	126595407	18.49	16.2517	8.96847	11.706	FTE2_peak_754	chr10_126595245_126595492	.	.	.
chr10	126723803	126723997	195	126723889	17.75	14.555	8.31992	10.1465	FTE2_peak_755	chr10_126723803_126723997	CTBP2	MIR4296	.
chr10	127941455	127941988	534	127941903	16.27	12.194	6.92179	7.97457	FTE2_peak_756	chr10_127941455_127941988	ADAM12	.	.
chr10	128086565	128086873	309	128086675	11.83	8.44993	5.9945	4.59841	FTE2_peak_757	chr10_128086565_128086873	.	ADAM12	C10orf90
chr10	128148704	128148911	208	128148888	13.31	10.5556	6.65661	6.55065	FTE2_peak_758	chr10_128148704_128148911	C10orf90	.	.
chr10	128946740	128946918	179	128946869	15.53	12.871	7.7218	8.58244	FTE2_peak_759	chr10_128946740_128946918	DOCK1;FAM196A	.	.
chr11	3926758	3926916	159	3926822	17.75	14.4883	8.27768	10.0831	FTE2_peak_760	chr11_3926758_3926916	STIM1	.	.
chr11	5385466	5385724	259	5385711	11.83	5.86499	4.27754	2.42626	FTE2_peak_761	chr11_5385466_5385724	OR51B5	OR51B6	OR51M1
chr11	5388951	5389107	157	5389031	18.49	16.4686	9.10364	11.8693	FTE2_peak_762	chr11_5388951_5389107	OR51B5	OR51B6	OR51M1
chr11	6453139	6453253	115	6453173	14.79	11.6732	7.34455	7.52556	FTE2_peak_763	chr11_6453139_6453253	HPX	APBB1	TRIM3
chr11	7013993	7014255	263	7014222	11.83	8.44993	5.9945	4.59841	FTE2_peak_764	chr11_7013993_7014255	.	.	NLRP14;ZNF214
chr11	8740938	8741145	208	8741092	14.05	10.5293	6.29364	6.53207	FTE2_peak_765	chr11_8740938_8741145	ST5	RPL27A	.
chr11	9241239	9241417	179	9241337	19.97	16.5755	9.07294	11.9727	FTE2_peak_766	chr11_9241239_9241417	DENND5A	.	.
chr11	9781245	9781614	370	9781380	31.8	22.5785	8.77715	17.5972	FTE2_peak_767	chr11_9781245_9781614	LOC283104	LOC440028;SWAP70	SBF2
chr11	9884541	9884655	115	9884585	12.57	9.5096	6.33996	5.56248	FTE2_peak_768	chr11_9884541_9884655	SBF2	.	.
chr11	9927057	9927377	321	9927058	14.05	6.17368	3.76281	2.71417	FTE2_peak_769	chr11_9927057_9927377	SBF2	.	.
chr11	9927477	9927878	402	9927798	35.5	31.578	12.166	26.2102	FTE2_peak_770	chr11_9927477_9927878	SBF2	.	.
chr11	9927994	9928312	319	9928220	23.67	22.815	11.4722	17.8232	FTE2_peak_771	chr11_9927994_9928312	SBF2	.	.
chr11	9964976	9965098	123	9965027	13.31	7.97574	5.03934	4.27299	FTE2_peak_772	chr11_9964976_9965098	SBF2	.	.
chr11	9965415	9965536	122	9965472	15.53	11.9176	7.11747	7.71331	FTE2_peak_773	chr11_9965415_9965536	SBF2	.	.
chr11	10139263	10139594	332	10139348	24.4	18.4988	8.46827	13.7555	FTE2_peak_774	chr11_10139263_10139594	SBF2	.	.
chr11	10139757	10139871	115	10139839	12.57	9.5096	6.33996	5.56248	FTE2_peak_775	chr11_10139757_10139871	SBF2	.	.
chr11	10373420	10373578	159	10373495	17.75	15.2456	8.75818	10.7426	FTE2_peak_776	chr11_10373420_10373578	.	.	.
chr11	10428712	10428838	127	10428745	10.35	7.42451	5.30358	3.76232	FTE2_peak_777	chr11_10428712_10428838	.	.	.
chr11	10681259	10681490	232	10681327	20.71	16.0313	8.3169	11.4944	FTE2_peak_778	chr11_10681259_10681490	MRVI1	.	.
chr11	10921480	10921616	137	10921515	13.31	9.31474	5.87147	5.42449	FTE2_peak_779	chr11_10921480_10921616	.	LOC729013	.
chr11	11770253	11770535	283	11770390	23.67	22.8954	11.5219	17.8823	FTE2_peak_780	chr11_11770253_11770535	.	.	.
chr11	12087846	12088083	238	12087954	36.24	38.5465	15.646	32.9335	FTE2_peak_781	chr11_12087846_12088083	.	.	.
chr11	12097892	12098184	293	12098096	15.53	12.8186	7.68853	8.56786	FTE2_peak_782	chr11_12097892_12098184	.	.	.
chr11	12108188	12108330	143	12108296	11.09	8.41146	5.62469	4.59841	FTE2_peak_783	chr11_12108188_12108330	.	.	MICAL2
chr11	12144853	12145133	281	12144927	13.31	10.6011	6.68542	6.55065	FTE2_peak_784	chr11_12144853_12145133	MICAL2	.	.
chr11	12148145	12148399	255	12148285	17.01	11.2084	6.00314	7.11989	FTE2_peak_785	chr11_12148145_12148399	MICAL2	.	.
chr11	12188651	12188918	268	12188764	22.19	16.3197	7.72873	11.7609	FTE2_peak_786	chr11_12188651_12188918	MICAL2	.	.
chr11	12197607	12197730	124	12197681	14.79	11.7222	7.37634	7.52556	FTE2_peak_787	chr11_12197607_12197730	MICAL2	.	.
chr11	12198949	12199097	149	12199043	9.61	5.70279	4.45967	2.29054	FTE2_peak_788	chr11_12198949_12199097	MICAL2	.	.
chr11	12204297	12204411	115	12204313	9.61	6.40474	4.93675	2.89558	FTE2_peak_789	chr11_12204297_12204411	MICAL2	.	.
chr11	12204705	12205022	318	12204809	22.19	21.5715	10.8309	16.6194	FTE2_peak_790	chr11_12204705_12205022	MICAL2	.	.
chr11	12222082	12222269	188	12222161	14.05	11.7222	7.03088	7.52556	FTE2_peak_791	chr11_12222082_12222269	MICAL2	.	.
chr11	12222393	12222670	278	12222614	17.01	15.1862	8.37647	10.7426	FTE2_peak_792	chr11_12222393_12222670	MICAL2	.	.
chr11	12235634	12235782	149	12235721	14.05	11.7222	7.03088	7.52556	FTE2_peak_793	chr11_12235634_12235782	MICAL2	.	.
chr11	12791477	12791745	269	12791684	19.23	13.1909	6.74268	8.88208	FTE2_peak_794	chr11_12791477_12791745	TEAD1	.	.
chr11	12840194	12840380	187	12840274	15.53	12.6904	7.60715	8.44998	FTE2_peak_795	chr11_12840194_12840380	TEAD1	.	.
chr11	12922196	12922557	362	12922278	11.09	8.44993	5.64904	4.59841	FTE2_peak_796	chr11_12922196_12922557	TEAD1	.	.
chr11	12923434	12923548	115	12923475	14.79	11.7222	7.37634	7.52556	FTE2_peak_797	chr11_12923434_12923548	TEAD1	.	.
chr11	13616905	13617084	180	13616982	13.31	7.53305	4.77057	3.8596	FTE2_peak_798	chr11_13616905_13617084	.	.	.
chr11	14395884	14396028	145	14396028	11.09	5.86499	4.03103	2.42626	FTE2_peak_799	chr11_14395884_14396028	.	RRAS2	.
chr11	15687046	15687275	230	15687128	16.27	13.9901	8.0325	9.64637	FTE2_peak_800	chr11_15687046_15687275	.	.	.
chr11	17192932	17193176	245	17193091	28.84	22.6514	9.72054	17.6672	FTE2_peak_801	chr11_17192932_17193176	.	PIK3C2A	.
chr11	18334697	18334844	148	18334766	18.49	15.7371	8.6481	11.2085	FTE2_peak_802	chr11_18334697_18334844	HPS5	.	GTF2H1
chr11	18430200	18430437	238	18430375	17.01	13.7354	7.49455	9.40621	FTE2_peak_803	chr11_18430200_18430437	.	LDHA	LDHC
chr11	18430751	18430944	194	18430810	14.05	8.41215	5.01708	4.59841	FTE2_peak_804	chr11_18430751_18430944	.	LDHA	LDHC
chr11	19381061	19381175	115	19381147	9.61	6.43625	4.95812	2.89558	FTE2_peak_805	chr11_19381061_19381175	NAV2	.	.
chr11	19391697	19391830	134	19391760	11.83	8.44993	5.9945	4.59841	FTE2_peak_806	chr11_19391697_19391830	NAV2	.	.
chr11	19392090	19392305	216	19392193	19.23	17.7137	9.4491	13.001	FTE2_peak_807	chr11_19392090_19392305	NAV2	.	.
chr11	19395830	19396000	171	19395889	22.19	17.0863	8.16415	12.4653	FTE2_peak_808	chr11_19395830_19396000	NAV2	.	.
chr11	19441078	19441270	193	19441183	13.31	10.6011	6.68542	6.55065	FTE2_peak_809	chr11_19441078_19441270	NAV2	.	.
chr11	19617495	19617707	213	19617605	19.97	10.1051	5.25503	6.12982	FTE2_peak_810	chr11_19617495_19617707	NAV2	MIR4486	.
chr11	19668601	19668795	195	19668687	10.35	7.42451	5.30358	3.76232	FTE2_peak_811	chr11_19668601_19668795	NAV2	.	.
chr11	20057331	20057493	163	20057421	11.09	8.44993	5.64904	4.59841	FTE2_peak_812	chr11_20057331_20057493	NAV2	.	.
chr11	20057915	20058029	115	20057983	11.09	8.44993	5.64904	4.59841	FTE2_peak_813	chr11_20057915_20058029	NAV2	.	.
chr11	20132893	20133023	131	20132977	14.79	11.0989	6.97165	7.02758	FTE2_peak_814	chr11_20132893_20133023	NAV2	.	.
chr11	23919070	23919224	155	23919142	12.57	9.5096	6.33996	5.56248	FTE2_peak_815	chr11_23919070_23919224	.	.	.
chr11	26209323	26209462	140	26209402	23.67	22.8954	11.5219	17.8823	FTE2_peak_816	chr11_26209323_26209462	.	.	.
chr11	26968944	26969136	193	26969037	14.79	11.7222	7.37634	7.52556	FTE2_peak_817	chr11_26968944_26969136	.	.	.
chr11	27235165	27235279	115	27235255	9.61	6.43625	4.95812	2.89558	FTE2_peak_818	chr11_27235165_27235279	.	.	.
chr11	27406969	27407120	152	27407038	12.57	9.5096	6.33996	5.56248	FTE2_peak_819	chr11_27406969_27407120	LGR4	CCDC34	.
chr11	27948625	27948770	146	27948732	11.83	8.44993	5.9945	4.59841	FTE2_peak_820	chr11_27948625_27948770	.	.	.
chr11	27955853	27956085	233	27955947	19.97	17.6472	9.75236	12.9975	FTE2_peak_821	chr11_27955853_27956085	.	.	.
chr11	27956232	27956548	317	27956356	11.83	8.44993	5.9945	4.59841	FTE2_peak_822	chr11_27956232_27956548	.	.	.
chr11	28031086	28031207	122	28031133	11.83	8.44993	5.9945	4.59841	FTE2_peak_823	chr11_28031086_28031207	.	.	KIF18A
chr11	28406053	28406194	142	28406100	19.23	15.0883	7.85402	10.6629	FTE2_peak_824	chr11_28406053_28406194	.	.	.
chr11	28779272	28779484	213	28779456	14.05	11.7222	7.03088	7.52556	FTE2_peak_825	chr11_28779272_28779484	.	.	.
chr11	28857975	28858089	115	28858048	9.61	6.43625	4.95812	2.89558	FTE2_peak_826	chr11_28857975_28858089	.	.	.
chr11	29040407	29040525	119	29040417	9.61	6.43625	4.95812	2.89558	FTE2_peak_827	chr11_29040407_29040525	.	.	.
chr11	29115103	29115217	115	29115152	13.31	10.6011	6.68542	6.55065	FTE2_peak_828	chr11_29115103_29115217	.	.	.
chr11	29141656	29141871	216	29141723	14.79	10.5787	6.63479	6.55065	FTE2_peak_829	chr11_29141656_29141871	.	.	.
chr11	29193301	29193415	115	29193325	11.09	8.44993	5.64904	4.59841	FTE2_peak_830	chr11_29193301_29193415	.	.	.
chr11	29195136	29195526	391	29195385	14.79	11.7222	7.37634	7.52556	FTE2_peak_831	chr11_29195136_29195526	.	.	.
chr11	29322018	29322209	192	29322119	11.83	8.41146	5.96867	4.59841	FTE2_peak_832	chr11_29322018_29322209	.	.	.
chr11	29471328	29471459	132	29471401	12.57	9.5096	6.33996	5.56248	FTE2_peak_833	chr11_29471328_29471459	.	.	.
chr11	32055915	32056106	192	32056029	19.97	17.2472	9.49833	12.6189	FTE2_peak_834	chr11_32055915_32056106	.	.	.
chr11	32140243	32140484	242	32140277	12.57	6.6833	4.52406	3.12007	FTE2_peak_835	chr11_32140243_32140484	.	RCN1	.
chr11	32334202	32334349	148	32334241	14.79	11.7222	7.37634	7.52556	FTE2_peak_836	chr11_32334202_32334349	.	.	.
chr11	33654851	33655060	210	33654913	11.83	8.44993	5.9945	4.59841	FTE2_peak_837	chr11_33654851_33655060	C11orf41	.	.
chr11	33696229	33696343	115	33696291	11.09	8.44993	5.64904	4.59841	FTE2_peak_838	chr11_33696229_33696343	.	C11orf41	C11orf91;CD59
chr11	33711972	33712195	224	33712105	17.75	11.2084	6.24965	7.11989	FTE2_peak_839	chr11_33711972_33712195	.	C11orf41	C11orf91;CD59
chr11	33713514	33713666	153	33713594	11.09	8.44993	5.64904	4.59841	FTE2_peak_840	chr11_33713514_33713666	.	C11orf41	C11orf91;CD59
chr11	33713871	33713992	122	33713954	11.83	8.44993	5.9945	4.59841	FTE2_peak_841	chr11_33713871_33713992	.	C11orf41	C11orf91;CD59
chr11	33744484	33744642	159	33744583	10.35	7.42451	5.30358	3.76232	FTE2_peak_842	chr11_33744484_33744642	CD59	C11orf91	FBXO3
chr11	33744811	33745128	318	33744902	18.49	16.4686	9.10364	11.8693	FTE2_peak_843	chr11_33744811_33745128	CD59	C11orf91	FBXO3
chr11	34364849	34364997	149	34364920	18.49	16.4686	9.10364	11.8693	FTE2_peak_844	chr11_34364849_34364997	ABTB2	.	.
chr11	34366590	34366955	366	34366743	22.93	21.5715	11.1764	16.6194	FTE2_peak_845	chr11_34366590_34366955	ABTB2	.	.
chr11	34621149	34621429	281	34621339	18.49	16.4686	9.10364	11.8693	FTE2_peak_846	chr11_34621149_34621429	.	.	EHF
chr11	34676407	34676723	317	34676613	28.84	29.7668	13.9401	24.4572	FTE2_peak_847	chr11_34676407_34676723	EHF	.	.
chr11	34771772	34772089	318	34772015	19.97	16.8668	9.2572	12.2516	FTE2_peak_848	chr11_34771772_34772089	.	.	.
chr11	35057603	35057786	184	35057688	13.31	10.6011	6.68542	6.55065	FTE2_peak_849	chr11_35057603_35057786	.	.	.
chr11	35120853	35121031	179	35120942	11.83	8.44993	5.9945	4.59841	FTE2_peak_850	chr11_35120853_35121031	.	.	.
chr11	35188349	35188465	117	35188393	14.79	11.7222	7.37634	7.52556	FTE2_peak_851	chr11_35188349_35188465	CD44	.	.
chr11	35236117	35236444	328	35236399	13.31	9.9222	6.25512	5.96094	FTE2_peak_852	chr11_35236117_35236444	CD44	.	.
chr11	35310878	35310992	115	35310965	12.57	9.5096	6.33996	5.56248	FTE2_peak_853	chr11_35310878_35310992	SLC1A2	.	.
chr11	35513115	35513295	181	35513183	21.45	15.2574	7.48222	10.7466	FTE2_peak_854	chr11_35513115_35513295	PAMR1	.	.
chr11	35563651	35563953	303	35563820	14.79	11.7222	7.37634	7.52556	FTE2_peak_855	chr11_35563651_35563953	.	PAMR1	.
chr11	35601149	35601399	251	35601316	19.97	17.7137	9.79456	13.001	FTE2_peak_856	chr11_35601149_35601399	.	.	.
chr11	35651578	35651725	148	35651712	18.49	5.85335	3.24808	2.42626	FTE2_peak_857	chr11_35651578_35651725	.	FJX1	.
chr11	36034686	36034800	115	36034707	12.57	9.5096	6.33996	5.56248	FTE2_peak_858	chr11_36034686_36034800	LDLRAD3	MIR3973	.
chr11	36056618	36056738	121	36056690	18.49	12.1886	6.49616	7.97106	FTE2_peak_859	chr11_36056618_36056738	LDLRAD3	MIR3973	.
chr11	36113289	36113500	212	36113355	11.83	8.44993	5.9945	4.59841	FTE2_peak_860	chr11_36113289_36113500	LDLRAD3	.	.
chr11	36318904	36319127	224	36318993	18.49	9.25272	4.87212	5.36966	FTE2_peak_861	chr11_36318904_36319127	PRR5L	COMMD9	.
chr11	36491380	36491575	196	36491486	14.05	11.7222	7.03088	7.52556	FTE2_peak_862	chr11_36491380_36491575	.	PRR5L	TRAF6
chr11	43942350	43942506	157	43942434	17.01	13.3323	7.25163	9.0151	FTE2_peak_863	chr11_43942350_43942506	LOC100507300	ALKBH3;LOC729799	C11orf96
chr11	44596202	44596506	305	44596454	13.31	9.87279	6.22384	5.91285	FTE2_peak_864	chr11_44596202_44596506	CD82	.	.
chr11	44859379	44859498	120	44859422	14.79	10.5787	6.63479	6.55065	FTE2_peak_865	chr11_44859379_44859498	TSPAN18	.	.
chr11	44863854	44864030	177	44863950	20.71	18.9798	10.14	14.1948	FTE2_peak_866	chr11_44863854_44864030	TSPAN18	.	.
chr11	46999871	46999986	116	46999957	11.09	8.44993	5.64904	4.59841	FTE2_peak_867	chr11_46999871_46999986	C11orf49	.	.
chr11	47968729	47968852	124	47968750	14.05	9.88123	5.89667	5.92097	FTE2_peak_868	chr11_47968729_47968852	.	.	.
chr11	57546099	57546256	158	57546150	17.01	15.2456	8.41272	10.7426	FTE2_peak_869	chr11_57546099_57546256	CTNND1;TMX2-CTNND1	BTBD18	.
chr11	58086190	58086321	132	58086237	8.87	5.48854	4.61266	2.08579	FTE2_peak_870	chr11_58086190_58086321	.	.	.
chr11	58341071	58341241	171	58341177	14.05	9.8378	5.87022	5.87847	FTE2_peak_871	chr11_58341071_58341241	LPXN	.	ZFP91;ZFP91-CNTF
chr11	58687141	58687271	131	58687187	16.27	14.046	8.06726	9.66458	FTE2_peak_872	chr11_58687141_58687271	.	.	GLYATL1;LOC283194
chr11	61731578	61731777	200	61731688	22.19	10.2238	4.63724	6.24509	FTE2_peak_873	chr11_61731578_61731777	BEST1;FTH1	.	.
chr11	62194283	62194444	162	62194393	12.57	6.6833	4.52406	3.12007	FTE2_peak_874	chr11_62194283_62194444	.	SCGB1A1	AHNAK
chr11	62608479	62609347	869	62608990	84.31	85.4179	19.6788	77.7279	FTE2_peak_875	chr11_62608479_62609347	.	STX5;WDR74	SLC3A2;SNHG1;SNORD22;SNORD25;SNORD26;SNORD27;SNORD28;SNORD29;SNORD30;SNORD31
chr11	64153920	64154167	248	64154103	11.09	8.44993	5.64904	4.59841	FTE2_peak_876	chr11_64153920_64154167	.	CCDC88B;MIR1237;RPS6KA4	.
chr11	65047327	65047486	160	65047407	10.35	7.26195	5.19732	3.66703	FTE2_peak_877	chr11_65047327_65047486	POLA2	.	.
chr11	65190242	65190365	124	65190259	29.58	9.81515	3.76157	5.85713	FTE2_peak_878	chr11_65190242_65190365	NEAT1	FRMD8	MIR612
chr11	65191394	65191651	258	65191590	14.79	6.7575	4.27819	3.19254	FTE2_peak_879	chr11_65191394_65191651	NEAT1	FRMD8	MIR612
chr11	65191955	65192285	331	65192110	23.67	15.2992	7.05629	10.788	FTE2_peak_880	chr11_65191955_65192285	NEAT1	FRMD8	MIR612
chr11	65192942	65193333	392	65192985	16.27	8.87793	4.97332	5.0125	FTE2_peak_881	chr11_65192942_65193333	NEAT1	FRMD8	MIR612
chr11	65193720	65194869	1150	65194270	24.4	17.1559	7.72535	12.5322	FTE2_peak_882	chr11_65193720_65194869	NEAT1	FRMD8	MIR612
chr11	65195257	65196521	1265	65195773	25.88	22.855	10.8754	17.8622	FTE2_peak_883	chr11_65195257_65196521	.	FRMD8;NEAT1	MIR612
chr11	65197313	65197450	138	65197370	12.57	6.6833	4.52406	3.12007	FTE2_peak_884	chr11_65197313_65197450	.	FRMD8;NEAT1	MIR612
chr11	65197705	65198270	566	65197782	17.75	13.8552	7.87771	9.51757	FTE2_peak_885	chr11_65197705_65198270	.	FRMD8;NEAT1	MIR612
chr11	65199035	65199222	188	65199161	11.83	7.96052	5.66562	4.25871	FTE2_peak_886	chr11_65199035_65199222	.	FRMD8;NEAT1	MIR612
chr11	65201826	65202054	229	65202027	13.31	7.53305	4.77057	3.8596	FTE2_peak_887	chr11_65201826_65202054	.	FRMD8;NEAT1	MIR612
chr11	65202537	65202656	120	65202578	12.57	9.5096	6.33996	5.56248	FTE2_peak_888	chr11_65202537_65202656	.	FRMD8;NEAT1	MIR612
chr11	65203307	65203481	175	65203381	14.05	11.7222	7.03088	7.52556	FTE2_peak_889	chr11_65203307_65203481	.	FRMD8;NEAT1	MIR612
chr11	65266428	65268136	1709	65266856	46.59	43.1957	14.3217	37.4284	FTE2_peak_890	chr11_65266428_65268136	MALAT1	.	SCYL1
chr11	65268252	65272330	4079	65268464	42.89	35.7387	12.0421	30.2219	FTE2_peak_891	chr11_65268252_65272330	MALAT1	.	SCYL1
chr11	65272458	65272896	439	65272780	21.45	15.9878	7.90375	11.4535	FTE2_peak_892	chr11_65272458_65272896	MALAT1	.	SCYL1
chr11	65272999	65273268	270	65273255	17.75	6.60524	3.74979	3.05596	FTE2_peak_893	chr11_65272999_65273268	MALAT1	.	SCYL1
chr11	65273365	65273732	368	65273534	22.93	16.8027	8.25737	12.1935	FTE2_peak_894	chr11_65273365_65273732	MALAT1	.	SCYL1
chr11	65273836	65275493	1658	65274914	43.63	34.7042	11.1582	29.2245	FTE2_peak_895	chr11_65273836_65275493	MALAT1	.	SCYL1
chr11	66659652	66659832	181	66659673	13.31	5.46828	3.57793	2.08579	FTE2_peak_896	chr11_66659652_66659832	PC	.	.
chr11	66703933	66704166	234	66703981	15.53	6.9063	4.13258	3.33144	FTE2_peak_897	chr11_66703933_66704166	PC	.	.
chr11	66738328	66738556	229	66738460	24.4	18.2662	8.33765	13.5386	FTE2_peak_898	chr11_66738328_66738556	.	PC	C11orf86
chr11	66801473	66801709	237	66801519	15.53	10.1114	5.99034	6.13608	FTE2_peak_899	chr11_66801473_66801709	SYT12	.	RHOD
chr11	68023885	68024020	136	68023971	20.71	11.4257	5.68621	7.32943	FTE2_peak_900	chr11_68023885_68024020	.	.	C11orf24
chr11	70998146	70998260	115	70998214	19.23	7.99138	4.04561	4.28737	FTE2_peak_901	chr11_70998146_70998260	.	.	.
chr11	70998541	70998724	184	70998627	17.75	11.0854	6.17656	7.02033	FTE2_peak_902	chr11_70998541_70998724	.	.	.
chr11	71783429	71783605	177	71783542	17.01	12.7444	6.90016	8.49901	FTE2_peak_903	chr11_71783429_71783605	NUMA1	MIR3165	LAMTOR1;LRTOMT
chr11	71852198	71852345	148	71852269	15.53	10.6677	6.33346	6.61483	FTE2_peak_904	chr11_71852198_71852345	.	C11orf51;FOLR3	.
chr11	72686929	72687201	273	72687093	23.67	22.8954	11.5219	17.8823	FTE2_peak_905	chr11_72686929_72687201	FCHSD2	.	.
chr11	73849629	73849816	188	73849735	10.35	7.42451	5.30358	3.76232	FTE2_peak_906	chr11_73849629_73849816	C2CD3	.	.
chr11	73851148	73851302	155	73851215	14.05	11.7222	7.03088	7.52556	FTE2_peak_907	chr11_73851148_73851302	C2CD3	.	.
chr11	73922306	73922495	190	73922414	11.09	7.96052	5.33911	4.25871	FTE2_peak_908	chr11_73922306_73922495	PPME1	.	.
chr11	74030369	74030483	115	74030386	11.09	7.96052	5.33911	4.25871	FTE2_peak_909	chr11_74030369_74030483	.	P4HA3	PGM2L1
chr11	75569669	75569960	292	75569932	11.09	8.44993	5.64904	4.59841	FTE2_peak_910	chr11_75569669_75569960	UVRAG	.	.
chr11	75677607	75677761	155	75677654	17.01	15.2456	8.41272	10.7426	FTE2_peak_911	chr11_75677607_75677761	UVRAG	.	.
chr11	75741501	75741634	134	75741576	11.83	8.44993	5.9945	4.59841	FTE2_peak_912	chr11_75741501_75741634	UVRAG	.	.
chr11	76331707	76331857	151	76331785	19.97	13.1909	6.98919	8.88208	FTE2_peak_913	chr11_76331707_76331857	.	.	.
chr11	78512266	78512492	227	78512398	20.71	14.2141	7.2357	9.82357	FTE2_peak_914	chr11_78512266_78512492	ODZ4	.	.
chr11	79127403	79127528	126	79127460	9.61	6.43625	4.95812	2.89558	FTE2_peak_915	chr11_79127403_79127528	ODZ4	MIR708	.
chr11	82762882	82763153	272	82763074	12.57	9.46765	6.31264	5.56248	FTE2_peak_916	chr11_82762882_82763153	RAB30	SNORA70E	LOC100506233
chr11	85539389	85539550	162	85539451	9.61	6.43625	4.95812	2.89558	FTE2_peak_917	chr11_85539389_85539550	.	SYTL2	CCDC83
chr11	85758437	85758581	145	85758520	13.31	5.46828	3.57793	2.08579	FTE2_peak_918	chr11_85758437_85758581	PICALM	.	.
chr11	86013072	86013265	194	86013185	25.14	19.2548	8.51607	14.4614	FTE2_peak_919	chr11_86013072_86013265	C11orf73	EED	.
chr11	86235286	86235470	185	86235369	13.31	7.53305	4.77057	3.8596	FTE2_peak_920	chr11_86235286_86235470	ME3	.	.
chr11	86407194	86407452	259	86407262	23.67	22.8954	11.5219	17.8823	FTE2_peak_921	chr11_86407194_86407452	.	ME3	.
chr11	86430726	86430851	126	86430784	13.31	10.6011	6.68542	6.55065	FTE2_peak_922	chr11_86430726_86430851	.	.	.
chr11	86430965	86431115	151	86431005	12.57	9.5096	6.33996	5.56248	FTE2_peak_923	chr11_86430965_86431115	.	.	.
chr11	86453008	86453194	187	86453093	15.53	12.6904	7.60715	8.44998	FTE2_peak_924	chr11_86453008_86453194	.	.	.
chr11	86454544	86454915	372	86454815	19.23	16.7198	8.84092	12.1123	FTE2_peak_925	chr11_86454544_86454915	.	.	.
chr11	87156128	87156463	336	87156370	11.83	8.44993	5.9945	4.59841	FTE2_peak_926	chr11_87156128_87156463	.	.	.
chr11	88016334	88016448	115	88016419	9.61	6.43625	4.95812	2.89558	FTE2_peak_927	chr11_88016334_88016448	.	.	CTSC
chr11	88213388	88213746	359	88213658	14.79	11.0989	6.97165	7.02758	FTE2_peak_928	chr11_88213388_88213746	.	.	GRM5
chr11	88269203	88269347	145	88269340	8.87	5.48854	4.61266	2.08579	FTE2_peak_929	chr11_88269203_88269347	GRM5	.	.
chr11	92788134	92788341	208	92788180	17.01	15.2456	8.41272	10.7426	FTE2_peak_930	chr11_92788134_92788341	.	.	.
chr11	93461551	93462282	732	93461688	14.79	11.7222	7.37634	7.52556	FTE2_peak_931	chr11_93461551_93462282	KIAA1731	SCARNA9	C11orf54;MIR1304;SNORA1;SNORA18;SNORA25;SNORA32;SNORA40;SNORA8;SNORD5;SNORD6;TAF1D
chr11	93464506	93464620	115	93464592	10.35	7.42451	5.30358	3.76232	FTE2_peak_932	chr11_93464506_93464620	.	KIAA1731;SCARNA9;SNORA25;SNORA32	C11orf54;MIR1304;SNORA1;SNORA18;SNORA40;SNORA8;SNORD5;SNORD6;TAF1D
chr11	93642123	93642265	143	93642156	9.61	6.43625	4.95812	2.89558	FTE2_peak_933	chr11_93642123_93642265	.	.	.
chr11	93681457	93681629	173	93681549	25.88	25.5955	12.5582	20.4399	FTE2_peak_934	chr11_93681457_93681629	.	.	.
chr11	93869547	93869670	124	93869581	14.79	11.7222	7.37634	7.52556	FTE2_peak_935	chr11_93869547_93869670	PANX1	HEPHL1	.
chr11	94527848	94528110	263	94528058	11.83	8.44993	5.9945	4.59841	FTE2_peak_936	chr11_94527848_94528110	AMOTL1	.	.
chr11	94666593	94666753	161	94666646	11.09	8.44993	5.64904	4.59841	FTE2_peak_937	chr11_94666593_94666753	.	.	CWC15
chr11	95239169	95239443	275	95239250	11.83	8.44993	5.9945	4.59841	FTE2_peak_938	chr11_95239169_95239443	.	.	.
chr11	95610518	95610651	134	95610541	14.05	11.7222	7.03088	7.52556	FTE2_peak_939	chr11_95610518_95610651	MTMR2	.	.
chr11	95823928	95824046	119	95823988	11.83	8.44993	5.9945	4.59841	FTE2_peak_940	chr11_95823928_95824046	MAML2	.	.
chr11	95888930	95889070	141	95889031	11.83	8.44993	5.9945	4.59841	FTE2_peak_941	chr11_95888930_95889070	MAML2	.	.
chr11	95889487	95889601	115	95889572	12.57	9.5096	6.33996	5.56248	FTE2_peak_942	chr11_95889487_95889601	MAML2	.	.
chr11	95921555	95921669	115	95921555	11.09	5.86499	4.03103	2.42626	FTE2_peak_943	chr11_95921555_95921669	MAML2	.	.
chr11	95945747	95945861	115	95945800	10.35	7.42451	5.30358	3.76232	FTE2_peak_944	chr11_95945747_95945861	MAML2	.	.
chr11	95996508	95996726	219	95996540	9.61	6.43625	4.95812	2.89558	FTE2_peak_945	chr11_95996508_95996726	MAML2	.	.
chr11	96048732	96048851	120	96048825	9.61	6.43625	4.95812	2.89558	FTE2_peak_946	chr11_96048732_96048851	MAML2	.	MIR1260B
chr11	97836818	97837070	253	97836930	17.75	15.2456	8.75818	10.7426	FTE2_peak_947	chr11_97836818_97837070	.	.	.
chr11	99196708	99196928	221	99196810	11.09	8.44993	5.64904	4.59841	FTE2_peak_948	chr11_99196708_99196928	CNTN5	.	.
chr11	100490587	100490729	143	100490626	12.57	9.5096	6.33996	5.56248	FTE2_peak_949	chr11_100490587_100490729	.	.	.
chr11	100681018	100681212	195	100681072	15.53	12.2031	7.29816	7.98048	FTE2_peak_950	chr11_100681018_100681212	ARHGAP42	.	.
chr11	101317136	101317321	186	101317216	11.09	5.86499	4.03103	2.42626	FTE2_peak_951	chr11_101317136_101317321	.	.	TRPC6
chr11	101734191	101734442	252	101734372	18.49	16.4686	9.10364	11.8693	FTE2_peak_952	chr11_101734191_101734442	.	.	ANGPTL5
chr11	102009556	102009689	134	102009610	15.53	12.871	7.7218	8.58244	FTE2_peak_953	chr11_102009556_102009689	YAP1	.	.
chr11	102049136	102049265	130	102049191	12.57	8.61613	5.75824	4.75815	FTE2_peak_954	chr11_102049136_102049265	YAP1	.	.
chr11	102096772	102096926	155	102096886	11.83	8.44993	5.9945	4.59841	FTE2_peak_955	chr11_102096772_102096926	YAP1	.	.
chr11	102194664	102194855	192	102194807	12.57	9.5096	6.33996	5.56248	FTE2_peak_956	chr11_102194664_102194855	BIRC3	.	BIRC2
chr11	102216858	102217142	285	102217036	14.79	7.67895	4.81867	3.99406	FTE2_peak_957	chr11_102216858_102217142	.	BIRC3	BIRC2
chr11	102632502	102632625	124	102632544	11.83	8.44993	5.9945	4.59841	FTE2_peak_958	chr11_102632502_102632625	.	.	LOC100288077;MMP1;MMP10
chr11	103831868	103831982	115	103831917	11.83	8.44993	5.9945	4.59841	FTE2_peak_959	chr11_103831868_103831982	PDGFD	.	.
chr11	104918013	104918256	244	104918088	12.57	9.5096	6.33996	5.56248	FTE2_peak_960	chr11_104918013_104918256	.	CARD16;CASP1;CASP5	.
chr11	105023040	105023276	237	105023131	11.09	8.44993	5.64904	4.59841	FTE2_peak_961	chr11_105023040_105023276	.	CARD18	.
chr11	105115189	105115496	308	105115308	26.62	26.9704	12.9037	21.759	FTE2_peak_962	chr11_105115189_105115496	.	.	.
chr11	106239430	106239551	122	106239495	12.57	9.5096	6.33996	5.56248	FTE2_peak_963	chr11_106239430_106239551	.	.	.
chr11	106262593	106262710	118	106262672	10.35	7.42451	5.30358	3.76232	FTE2_peak_964	chr11_106262593_106262710	.	.	.
chr11	106269829	106270032	204	106269969	13.31	7.53305	4.77057	3.8596	FTE2_peak_965	chr11_106269829_106270032	.	.	.
chr11	106334759	106334905	147	106334849	11.83	8.44993	5.9945	4.59841	FTE2_peak_966	chr11_106334759_106334905	.	.	.
chr11	106337648	106337782	135	106337728	12.57	7.75217	5.20007	4.06361	FTE2_peak_967	chr11_106337648_106337782	.	.	.
chr11	106832225	106832537	313	106832475	14.79	11.7222	7.37634	7.52556	FTE2_peak_968	chr11_106832225_106832537	GUCY1A2	.	.
chr11	108303696	108303868	173	108303799	16.27	14.046	8.06726	9.66458	FTE2_peak_969	chr11_108303696_108303868	C11orf65	.	.
chr11	108430254	108430450	197	108430312	11.83	8.44993	5.9945	4.59841	FTE2_peak_970	chr11_108430254_108430450	EXPH5	.	.
chr11	108430705	108430926	222	108430818	17.01	15.2456	8.41272	10.7426	FTE2_peak_971	chr11_108430705_108430926	EXPH5	.	.
chr11	108639271	108639400	130	108639335	19.97	11.0282	5.75242	6.96452	FTE2_peak_972	chr11_108639271_108639400	DDX10	.	.
chr11	109418464	109418698	235	109418573	34.76	30.322	11.9194	24.993	FTE2_peak_973	chr11_109418464_109418698	.	.	.
chr11	110934898	110935037	140	110934924	11.83	8.44993	5.9945	4.59841	FTE2_peak_974	chr11_110934898_110935037	.	.	.
chr11	111428505	111428744	240	111428731	11.09	8.44993	5.64904	4.59841	FTE2_peak_975	chr11_111428505_111428744	LAYN	C11orf88	.
chr11	111502532	111502646	115	111502596	12.57	9.5096	6.33996	5.56248	FTE2_peak_976	chr11_111502532_111502646	SIK2	.	.
chr11	111565615	111565818	204	111565751	11.83	8.44993	5.9945	4.59841	FTE2_peak_977	chr11_111565615_111565818	SIK2	.	.
chr11	112028086	112028265	180	112028237	11.83	8.44993	5.9945	4.59841	FTE2_peak_978	chr11_112028086_112028265	IL18	.	BCO2;TEX12
chr11	112112348	112112645	298	112112409	14.79	11.6732	7.34455	7.52556	FTE2_peak_979	chr11_112112348_112112645	.	BCO2;PTS	C11orf34
chr11	113545929	113546076	148	113546029	14.05	11.7222	7.03088	7.52556	FTE2_peak_980	chr11_113545929_113546076	.	.	TMPRSS5
chr11	114005641	114005984	344	114005700	16.27	14.046	8.06726	9.66458	FTE2_peak_981	chr11_114005641_114005984	ZBTB16	.	.
chr11	114020800	114020965	166	114020856	14.79	11.7222	7.37634	7.52556	FTE2_peak_982	chr11_114020800_114020965	ZBTB16	.	.
chr11	114025290	114025518	229	114025429	19.23	16.295	8.58211	11.7485	FTE2_peak_983	chr11_114025290_114025518	ZBTB16	.	.
chr11	114033659	114033773	115	114033705	20.71	10.9285	5.42678	6.86854	FTE2_peak_984	chr11_114033659_114033773	ZBTB16	.	.
chr11	114050010	114050309	300	114050108	11.83	8.44993	5.9945	4.59841	FTE2_peak_985	chr11_114050010_114050309	ZBTB16	.	.
chr11	114165615	114166082	468	114166031	19.97	10.0802	5.24189	6.10878	FTE2_peak_986	chr11_114165615_114166082	.	.	NNMT
chr11	114167759	114168063	305	114167955	14.79	9.66758	6.05011	5.71251	FTE2_peak_987	chr11_114167759_114168063	NNMT	.	.
chr11	115097333	115097525	193	115097435	18.49	16.4686	9.10364	11.8693	FTE2_peak_988	chr11_115097333_115097525	CADM1	.	.
chr11	116680446	116680560	115	116680499	13.31	9.09943	5.73616	5.22244	FTE2_peak_989	chr11_116680446_116680560	.	APOA5;ZNF259	APOA1;APOA4;APOC3
chr11	116741982	116742137	156	116742083	10.35	7.42451	5.30358	3.76232	FTE2_peak_990	chr11_116741982_116742137	SIK3	.	.
chr11	116855417	116855549	133	116855493	16.27	12.5698	7.15257	8.33675	FTE2_peak_991	chr11_116855417_116855549	SIK3	.	.
chr11	116943246	116943541	296	116943411	24.4	19.9903	9.32286	15.1662	FTE2_peak_992	chr11_116943246_116943541	SIK3	.	.
chr11	119288202	119288505	304	119288451	17.01	9.28683	4.94085	5.40075	FTE2_peak_993	chr11_119288202_119288505	LOC100499227	.	THY1
chr11	120302779	120303106	328	120303004	14.05	11.7222	7.03088	7.52556	FTE2_peak_994	chr11_120302779_120303106	ARHGEF12	.	.
chr11	121466560	121466733	174	121466629	18.49	16.4686	9.10364	11.8693	FTE2_peak_995	chr11_121466560_121466733	SORL1	.	.
chr11	121699919	121700153	235	121699966	13.31	9.53979	6.01332	5.58999	FTE2_peak_996	chr11_121699919_121700153	.	.	.
chr11	121909263	121909532	270	121909450	14.79	11.7222	7.37634	7.52556	FTE2_peak_997	chr11_121909263_121909532	.	.	.
chr11	121915940	121916191	252	121916149	13.31	10.0225	6.31864	6.05575	FTE2_peak_998	chr11_121915940_121916191	.	.	.
chr11	122001101	122001268	168	122001166	9.61	6.43625	4.95812	2.89558	FTE2_peak_999	chr11_122001101_122001268	MIR100HG	BLID	MIR100;MIRLET7A2
chr11	122011362	122011476	115	122011412	9.61	6.43625	4.95812	2.89558	FTE2_peak_1000	chr11_122011362_122011476	MIR100HG	BLID	MIR100;MIRLET7A2
chr11	122026583	122026738	156	122026624	14.05	9.92501	5.92336	5.96344	FTE2_peak_1001	chr11_122026583_122026738	MIR100HG	MIR100;MIRLET7A2	.
chr11	122032887	122033097	211	122033000	16.27	13.8533	7.94748	9.51757	FTE2_peak_1002	chr11_122032887_122033097	MIR100HG	MIR100;MIRLET7A2	.
chr11	122048956	122049123	168	122049100	9.61	6.43625	4.95812	2.89558	FTE2_peak_1003	chr11_122048956_122049123	MIR100HG	MIR100	.
chr11	122051256	122051456	201	122051353	18.49	15.6665	8.60419	11.1393	FTE2_peak_1004	chr11_122051256_122051456	MIR100HG	MIR100	.
chr11	122060097	122060211	115	122060149	12.57	7.09019	4.77893	3.50544	FTE2_peak_1005	chr11_122060097_122060211	MIR100HG	.	.
chr11	122067771	122068148	378	122067954	21.45	20.2661	10.4855	15.4078	FTE2_peak_1006	chr11_122067771_122068148	MIR100HG	.	.
chr11	122078853	122079126	274	122079020	28.84	24.8031	10.9512	19.7012	FTE2_peak_1007	chr11_122078853_122079126	.	MIR100HG	.
chr11	122085404	122085556	153	122085444	8.13	5.48854	4.2672	2.08579	FTE2_peak_1008	chr11_122085404_122085556	.	MIR100HG	.
chr11	122619826	122619945	120	122619887	15.53	12.0873	7.22479	7.87912	FTE2_peak_1009	chr11_122619826_122619945	UBASH3B	.	.
chr11	122989331	122989445	115	122989375	15.53	11.8622	7.0824	7.6589	FTE2_peak_1010	chr11_122989331_122989445	CLMP	.	.
chr11	123044176	123044465	290	123044279	14.79	11.7222	7.37634	7.52556	FTE2_peak_1011	chr11_123044176_123044465	CLMP	.	.
chr11	123045501	123045735	235	123045671	11.83	8.44993	5.9945	4.59841	FTE2_peak_1012	chr11_123045501_123045735	CLMP	.	.
chr11	124148335	124148449	115	124148392	10.35	7.13841	5.11652	3.55148	FTE2_peak_1013	chr11_124148335_124148449	.	OR8G1;OR8G5	.
chr11	124155588	124155743	156	124155657	30.32	25.4237	10.4404	20.304	FTE2_peak_1014	chr11_124155588_124155743	.	OR8G1;OR8G5	OR8D1
chr11	124156089	124156255	167	124156232	15.53	9.31879	5.51011	5.42449	FTE2_peak_1015	chr11_124156089_124156255	.	OR8G1;OR8G5	OR8D1
chr11	124167949	124168085	137	124168002	14.79	8.41215	5.2636	4.59841	FTE2_peak_1016	chr11_124167949_124168085	.	.	OR8D1;OR8D2
chr11	124911100	124911221	122	124911140	11.09	8.44993	5.64904	4.59841	FTE2_peak_1017	chr11_124911100_124911221	CCDC15	.	SLC37A2
chr11	126861649	126862438	790	126862047	19.23	17.7137	9.4491	13.001	FTE2_peak_1018	chr11_126861649_126862438	KIRREL3	MIR3167	KIRREL3-AS3
chr11	126862745	126862961	217	126862896	13.31	10.6011	6.68542	6.55065	FTE2_peak_1019	chr11_126862745_126862961	KIRREL3	MIR3167	KIRREL3-AS3
chr11	127896554	127896840	287	127896629	15.53	12.871	7.7218	8.58244	FTE2_peak_1020	chr11_127896554_127896840	.	.	.
chr11	127909157	127909314	158	127909159	11.09	5.86499	4.03103	2.42626	FTE2_peak_1021	chr11_127909157_127909314	.	.	.
chr11	128077724	128078145	422	128078039	25.88	18.6923	8.44078	13.9439	FTE2_peak_1022	chr11_128077724_128078145	.	.	.
chr11	128080269	128080444	176	128080340	12.57	9.5096	6.33996	5.56248	FTE2_peak_1023	chr11_128080269_128080444	.	.	.
chr11	128206272	128206404	133	128206331	16.27	7.66459	4.31747	3.98035	FTE2_peak_1024	chr11_128206272_128206404	.	.	.
chr11	128290947	128291128	182	128291043	12.57	9.5096	6.33996	5.56248	FTE2_peak_1025	chr11_128290947_128291128	.	.	.
chr11	128328625	128328811	187	128328729	10.35	7.42451	5.30358	3.76232	FTE2_peak_1026	chr11_128328625_128328811	ETS1	.	.
chr11	128358620	128358743	124	128358674	14.05	11.7222	7.03088	7.52556	FTE2_peak_1027	chr11_128358620_128358743	ETS1	.	.
chr11	128366707	128366894	188	128366797	14.05	9.66758	5.76676	5.71251	FTE2_peak_1028	chr11_128366707_128366894	ETS1	.	.
chr11	128367058	128367192	135	128367117	12.57	6.6833	4.52406	3.12007	FTE2_peak_1029	chr11_128367058_128367192	ETS1	.	.
chr11	128584870	128585006	137	128584914	19.23	7.99138	4.04561	4.28737	FTE2_peak_1030	chr11_128584870_128585006	FLI1	LOC100507392	.
chr11	128585552	128585867	316	128585630	15.53	12.871	7.7218	8.58244	FTE2_peak_1031	chr11_128585552_128585867	FLI1	LOC100507392	.
chr11	129973499	129973627	129	129973555	12.57	9.5096	6.33996	5.56248	FTE2_peak_1032	chr11_129973499_129973627	APLP2	.	.
chr11	130350217	130350389	173	130350295	17.01	15.2456	8.41272	10.7426	FTE2_peak_1033	chr11_130350217_130350389	.	ADAMTS15	.
chr11	130516451	130516692	242	130516555	14.79	11.7222	7.37634	7.52556	FTE2_peak_1034	chr11_130516451_130516692	.	.	.
chr11	130642506	130642757	252	130642591	12.57	9.5096	6.33996	5.56248	FTE2_peak_1035	chr11_130642506_130642757	.	.	.
chr11	130717666	130717855	190	130717771	13.31	10.6011	6.68542	6.55065	FTE2_peak_1036	chr11_130717666_130717855	.	.	SNX19
chr11	130870484	130870621	138	130870571	16.27	14.046	8.06726	9.66458	FTE2_peak_1037	chr11_130870484_130870621	.	.	.
chr11	131618831	131618953	123	131618879	11.83	8.44993	5.9945	4.59841	FTE2_peak_1038	chr11_131618831_131618953	NTM	.	.
chr11	131626650	131626764	115	131626673	12.57	9.5096	6.33996	5.56248	FTE2_peak_1039	chr11_131626650_131626764	NTM	.	.
chr11	131630126	131630252	127	131630178	17.01	15.1862	8.37647	10.7426	FTE2_peak_1040	chr11_131630126_131630252	NTM	.	.
chr11	131758526	131758648	123	131758612	13.31	10.6011	6.68542	6.55065	FTE2_peak_1041	chr11_131758526_131758648	NTM	.	.
chr11	131847889	131848003	115	131847955	12.57	9.5096	6.33996	5.56248	FTE2_peak_1042	chr11_131847889_131848003	NTM	.	.
chr11	131924679	131924911	233	131924869	21.45	16.9183	8.4513	12.3025	FTE2_peak_1043	chr11_131924679_131924911	NTM	.	.
chr11	131934866	131935223	358	131935111	22.93	21.5715	11.1764	16.6194	FTE2_peak_1044	chr11_131934866_131935223	NTM	.	.
chr11	131942117	131942420	304	131942312	19.23	17.7137	9.4491	13.001	FTE2_peak_1045	chr11_131942117_131942420	NTM	.	.
chr11	132474506	132474654	149	132474593	17.01	15.2456	8.41272	10.7426	FTE2_peak_1046	chr11_132474506_132474654	OPCML	.	.
chr11	134819037	134819247	211	134819150	17.01	15.2456	8.41272	10.7426	FTE2_peak_1047	chr11_134819037_134819247	.	.	.
chr12	398030	398193	164	398116	8.87	5.48854	4.61266	2.08579	FTE2_peak_1048	chr12_398030_398193	KDM5A	SLC6A13	.
chr12	741430	741762	333	741483	16.27	10.598	5.96027	6.55065	FTE2_peak_1049	chr12_741430_741762	NINJ2	.	.
chr12	1459610	1459732	123	1459639	10.35	7.42451	5.30358	3.76232	FTE2_peak_1050	chr12_1459610_1459732	ERC1	.	.
chr12	1583465	1583637	173	1583546	14.05	10.7296	6.41708	6.67566	FTE2_peak_1051	chr12_1583465_1583637	ERC1	.	LOC100292680
chr12	2102681	2102824	144	2102752	24.4	18.4988	8.46827	13.7555	FTE2_peak_1052	chr12_2102681_2102824	DCP1B	.	.
chr12	2193852	2193966	115	2193914	11.83	8.44993	5.9945	4.59841	FTE2_peak_1053	chr12_2193852_2193966	CACNA1C	.	.
chr12	2374162	2374497	336	2374268	17.75	6.60524	3.74979	3.05596	FTE2_peak_1054	chr12_2374162_2374497	CACNA1C	.	.
chr12	2374692	2374817	126	2374736	22.19	16.3197	7.72873	11.7609	FTE2_peak_1055	chr12_2374692_2374817	CACNA1C	.	.
chr12	5205463	5205591	129	5205541	12.57	9.5096	6.33996	5.56248	FTE2_peak_1056	chr12_5205463_5205591	.	.	.
chr12	5211754	5211973	220	5211944	12.57	9.5096	6.33996	5.56248	FTE2_peak_1057	chr12_5211754_5211973	.	.	.
chr12	6454596	6454715	120	6454686	17.01	11.7947	6.34134	7.5947	FTE2_peak_1058	chr12_6454596_6454715	.	PLEKHG6;TNFRSF1A	SCNN1A
chr12	6647895	6648178	284	6648094	25.88	11.6757	4.96379	7.52556	FTE2_peak_1059	chr12_6647895_6648178	.	GAPDH;NCAPD2;SCARNA10	IFFO1;NOP2
chr12	6961573	6961755	183	6961662	65.82	28.3686	5.49725	23.1127	FTE2_peak_1060	chr12_6961573_6961755	USP5	CDCA3;GNB3;GPR162;LEPREL2	SPSB2;TPI1
chr12	7052967	7053354	388	7053072	30.32	18.6118	7.00226	13.8652	FTE2_peak_1061	chr12_7052967_7053354	C12orf57	ATN1;ENO2;LRRC23	EMG1;MIR141;MIR200C;PHB2;PTPN6;SCARNA12
chr12	7585947	7586129	183	7586029	16.27	10.8017	6.08094	6.74625	FTE2_peak_1062	chr12_7585947_7586129	CD163L1	.	.
chr12	8831378	8831592	215	8831515	17.75	12.2522	6.88035	8.02693	FTE2_peak_1063	chr12_8831378_8831592	.	MFAP5	RIMKLB
chr12	8833806	8834119	314	8833889	15.53	9.31879	5.51011	5.42449	FTE2_peak_1064	chr12_8833806_8834119	.	MFAP5	RIMKLB
chr12	9945779	9946006	228	9945816	11.09	8.41146	5.62469	4.59841	FTE2_peak_1065	chr12_9945779_9946006	MIR1244-1;MIR1244-2;MIR1244-3	.	.
chr12	10537926	10538046	121	10537995	18.49	16.4686	9.10364	11.8693	FTE2_peak_1066	chr12_10537926_10538046	KLRC4-KLRK1;KLRK1;MIR1244-1;MIR1244-2;MIR1244-3	.	KLRC3;KLRC4
chr12	10787020	10787341	322	10787217	51.77	56.3284	19.3643	50.1067	FTE2_peak_1067	chr12_10787020_10787341	MIR1244-1;MIR1244-2;MIR1244-3;STYK1	MAGOHB	.
chr12	11917043	11917160	118	11917138	9.61	6.43625	4.95812	2.89558	FTE2_peak_1068	chr12_11917043_11917160	ETV6;MIR1244-1;MIR1244-2;MIR1244-3	.	.
chr12	11950627	11950877	251	11950803	16.27	11.6938	6.61681	7.52556	FTE2_peak_1069	chr12_11950627_11950877	ETV6;MIR1244-1;MIR1244-2;MIR1244-3	.	.
chr12	11951852	11952072	221	11951961	21.45	20.2661	10.4855	15.4078	FTE2_peak_1070	chr12_11951852_11952072	ETV6;MIR1244-1;MIR1244-2;MIR1244-3	.	.
chr12	12972883	12973068	186	12972969	11.83	7.96052	5.66562	4.25871	FTE2_peak_1071	chr12_12972883_12973068	DDX47;MIR1244-1;MIR1244-2;MIR1244-3	APOLD1	.
chr12	12976352	12976497	146	12976393	16.27	13.3961	7.66358	9.07622	FTE2_peak_1072	chr12_12976352_12976497	DDX47;MIR1244-1;MIR1244-2;MIR1244-3	.	.
chr12	13359395	13359575	181	13359446	12.57	9.5096	6.33996	5.56248	FTE2_peak_1073	chr12_13359395_13359575	EMP1;MIR1244-1;MIR1244-2;MIR1244-3	.	.
chr12	13373900	13374016	117	13373980	11.83	8.44993	5.9945	4.59841	FTE2_peak_1074	chr12_13373900_13374016	MIR1244-1;MIR1244-2;MIR1244-3	EMP1	.
chr12	13376326	13376448	123	13376391	11.09	8.44993	5.64904	4.59841	FTE2_peak_1075	chr12_13376326_13376448	MIR1244-1;MIR1244-2;MIR1244-3	EMP1	.
chr12	14994670	14995054	385	14994893	21.45	20.2661	10.4855	15.4078	FTE2_peak_1076	chr12_14994670_14995054	ART4;MIR1244-1;MIR1244-2;MIR1244-3	C12orf60;C12orf69	.
chr12	15782089	15782377	289	15782197	18.49	16.4686	9.10364	11.8693	FTE2_peak_1077	chr12_15782089_15782377	EPS8;MIR1244-1;MIR1244-2;MIR1244-3	.	.
chr12	15785821	15785935	115	15785902	10.35	7.42451	5.30358	3.76232	FTE2_peak_1078	chr12_15785821_15785935	EPS8;MIR1244-1;MIR1244-2;MIR1244-3	.	.
chr12	15832269	15832551	283	15832328	14.79	11.7222	7.37634	7.52556	FTE2_peak_1079	chr12_15832269_15832551	EPS8;MIR1244-1;MIR1244-2;MIR1244-3	.	.
chr12	15934361	15934491	131	15934421	10.35	7.42451	5.30358	3.76232	FTE2_peak_1080	chr12_15934361_15934491	EPS8;MIR1244-1;MIR1244-2;MIR1244-3	.	.
chr12	16131671	16131854	184	16131799	12.57	9.5096	6.33996	5.56248	FTE2_peak_1081	chr12_16131671_16131854	DERA;MIR1244-1;MIR1244-2;MIR1244-3	.	.
chr12	16411914	16412068	155	16411996	11.09	8.18008	5.47819	4.46758	FTE2_peak_1082	chr12_16411914_16412068	MIR1244-1;MIR1244-2;MIR1244-3;SLC15A5	.	.
chr12	16433965	16434213	249	16434033	11.83	8.44993	5.9945	4.59841	FTE2_peak_1083	chr12_16433965_16434213	MIR1244-1;MIR1244-2;MIR1244-3	SLC15A5	.
chr12	16503612	16503760	149	16503712	14.79	10.4318	6.53998	6.43792	FTE2_peak_1084	chr12_16503612_16503760	MGST1;MIR1244-1;MIR1244-2;MIR1244-3	.	.
chr12	16823458	16823572	115	16823486	12.57	9.5096	6.33996	5.56248	FTE2_peak_1085	chr12_16823458_16823572	MIR1244-1;MIR1244-2;MIR1244-3	.	.
chr12	18324563	18324844	282	18324638	23.67	22.8954	11.5219	17.8823	FTE2_peak_1086	chr12_18324563_18324844	MIR1244-1;MIR1244-2;MIR1244-3	.	.
chr12	18473094	18473226	133	18473179	14.79	11.7222	7.37634	7.52556	FTE2_peak_1087	chr12_18473094_18473226	MIR1244-1;MIR1244-2;MIR1244-3;PIK3C2G	.	.
chr12	18536059	18536523	465	18536257	48.81	60.2993	23.1673	53.956	FTE2_peak_1088	chr12_18536059_18536523	MIR1244-1;MIR1244-2;MIR1244-3;PIK3C2G	.	.
chr12	18876861	18877004	144	18876948	16.27	14.046	8.06726	9.66458	FTE2_peak_1089	chr12_18876861_18877004	MIR1244-1;MIR1244-2;MIR1244-3;PLCZ1	.	CAPZA3
chr12	18900973	18901164	192	18901073	21.45	20.2661	10.4855	15.4078	FTE2_peak_1090	chr12_18900973_18901164	MIR1244-1;MIR1244-2;MIR1244-3	CAPZA3;PLCZ1	.
chr12	19151933	19152083	151	19152034	11.83	8.41146	5.96867	4.59841	FTE2_peak_1091	chr12_19151933_19152083	MIR1244-1;MIR1244-2;MIR1244-3	.	.
chr12	20661362	20661532	171	20661419	16.27	10.2513	5.75662	6.26333	FTE2_peak_1092	chr12_20661362_20661532	MIR1244-1;MIR1244-2;MIR1244-3;PDE3A	.	.
chr12	21924449	21924565	117	21924466	11.83	8.44993	5.9945	4.59841	FTE2_peak_1093	chr12_21924449_21924565	KCNJ8;MIR1244-1;MIR1244-2;MIR1244-3	.	ABCC9
chr12	22436168	22436304	137	22436225	13.31	10.6011	6.68542	6.55065	FTE2_peak_1094	chr12_22436168_22436304	MIR1244-1;MIR1244-2;MIR1244-3;ST8SIA1	.	.
chr12	22630217	22630349	133	22630291	14.05	11.7222	7.03088	7.52556	FTE2_peak_1095	chr12_22630217_22630349	KIAA0528;MIR1244-1;MIR1244-2;MIR1244-3	.	.
chr12	22883178	22883308	131	22883236	11.09	5.86499	4.03103	2.42626	FTE2_peak_1096	chr12_22883178_22883308	MIR1244-1;MIR1244-2;MIR1244-3	.	.
chr12	24754003	24754287	285	24754106	17.75	15.2456	8.75818	10.7426	FTE2_peak_1097	chr12_24754003_24754287	MIR1244-1;MIR1244-2;MIR1244-3	LINC00477	.
chr12	26306331	26306536	206	26306487	12.57	9.5096	6.33996	5.56248	FTE2_peak_1098	chr12_26306331_26306536	MIR1244-1;MIR1244-2;MIR1244-3	BHLHE41	.
chr12	26425020	26425148	129	26425044	8.87	5.4605	4.59278	2.08579	FTE2_peak_1099	chr12_26425020_26425148	MIR1244-1;MIR1244-2;MIR1244-3	.	.
chr12	26427752	26427930	179	26427875	10.35	7.42451	5.30358	3.76232	FTE2_peak_1100	chr12_26427752_26427930	MIR1244-1;MIR1244-2;MIR1244-3	.	.
chr12	26801413	26801719	307	26801643	14.05	11.7222	7.03088	7.52556	FTE2_peak_1101	chr12_26801413_26801719	ITPR2;MIR1244-1;MIR1244-2;MIR1244-3	.	.
chr12	27329910	27330057	148	27330015	11.09	8.27115	5.53586	4.55397	FTE2_peak_1102	chr12_27329910_27330057	MIR1244-1;MIR1244-2;MIR1244-3	.	.
chr12	27658431	27658646	216	27658629	8.87	5.48854	4.61266	2.08579	FTE2_peak_1103	chr12_27658431_27658646	MIR1244-1;MIR1244-2;MIR1244-3	C12orf70	PPFIBP1
chr12	27702779	27703093	315	27702884	17.01	15.2456	8.41272	10.7426	FTE2_peak_1104	chr12_27702779_27703093	MIR1244-1;MIR1244-2;MIR1244-3;PPFIBP1	.	.
chr12	27726996	27727183	188	27727098	16.27	7.66459	4.31747	3.98035	FTE2_peak_1105	chr12_27726996_27727183	MIR1244-1;MIR1244-2;MIR1244-3;PPFIBP1	.	.
chr12	27772394	27772574	181	27772526	14.79	11.7222	7.37634	7.52556	FTE2_peak_1106	chr12_27772394_27772574	MIR1244-1;MIR1244-2;MIR1244-3;PPFIBP1	.	.
chr12	27780196	27780416	221	27780315	13.31	10.6011	6.68542	6.55065	FTE2_peak_1107	chr12_27780196_27780416	MIR1244-1;MIR1244-2;MIR1244-3;PPFIBP1	.	.
chr12	28019801	28019917	117	28019831	14.79	11.0989	6.97165	7.02758	FTE2_peak_1108	chr12_28019801_28019917	MIR1244-1;MIR1244-2;MIR1244-3	.	.
chr12	28024019	28024244	226	28024069	11.09	8.41146	5.62469	4.59841	FTE2_peak_1109	chr12_28024019_28024244	MIR1244-1;MIR1244-2;MIR1244-3	.	.
chr12	28052352	28052522	171	28052438	17.01	15.2456	8.41272	10.7426	FTE2_peak_1110	chr12_28052352_28052522	MIR1244-1;MIR1244-2;MIR1244-3	.	.
chr12	28283760	28283874	115	28283806	15.53	12.2031	7.29816	7.98048	FTE2_peak_1111	chr12_28283760_28283874	MIR1244-1;MIR1244-2;MIR1244-3	.	.
chr12	29894703	29894860	158	29894786	16.27	10.2513	5.75662	6.26333	FTE2_peak_1112	chr12_29894703_29894860	MIR1244-1;MIR1244-2;MIR1244-3;TMTC1	.	.
chr12	30179563	30179684	122	30179615	15.53	12.871	7.7218	8.58244	FTE2_peak_1113	chr12_30179563_30179684	MIR1244-1;MIR1244-2;MIR1244-3	.	.
chr12	30482163	30482281	119	30482237	10.35	7.42451	5.30358	3.76232	FTE2_peak_1114	chr12_30482163_30482281	MIR1244-1;MIR1244-2;MIR1244-3	.	.
chr12	31671797	31671945	149	31671890	14.79	8.41215	5.2636	4.59841	FTE2_peak_1115	chr12_31671797_31671945	DENND5B;MIR1244-1;MIR1244-2;MIR1244-3	.	.
chr12	31902286	31902434	149	31902360	11.83	5.86499	4.27754	2.42626	FTE2_peak_1116	chr12_31902286_31902434	MIR1244-1;MIR1244-2;MIR1244-3	AMN1	.
chr12	32268746	32268928	183	32268901	14.05	10.9909	6.57834	6.92851	FTE2_peak_1117	chr12_32268746_32268928	BICD1;MIR1244-1;MIR1244-2;MIR1244-3	.	.
chr12	32686773	32687319	547	32686865	19.23	16.6473	8.79671	12.0427	FTE2_peak_1118	chr12_32686773_32687319	FGD4;MIR1244-1;MIR1244-2;MIR1244-3	.	.
chr12	39897339	39897463	125	39897370	14.79	8.41215	5.2636	4.59841	FTE2_peak_1119	chr12_39897339_39897463	MIR1244-1;MIR1244-2;MIR1244-3	.	.
chr12	43150913	43151190	278	43151026	17.75	15.2456	8.75818	10.7426	FTE2_peak_1120	chr12_43150913_43151190	MIR1244-1;MIR1244-2;MIR1244-3	.	.
chr12	43355336	43355528	193	43355432	12.57	9.5096	6.33996	5.56248	FTE2_peak_1121	chr12_43355336_43355528	MIR1244-1;MIR1244-2;MIR1244-3	.	.
chr12	43679205	43679379	175	43679258	20.71	15.4496	7.96591	10.9354	FTE2_peak_1122	chr12_43679205_43679379	MIR1244-1;MIR1244-2;MIR1244-3	.	.
chr12	43700000	43700131	132	43700090	17.01	15.0408	8.28781	10.6168	FTE2_peak_1123	chr12_43700000_43700131	MIR1244-1;MIR1244-2;MIR1244-3	.	.
chr12	44136066	44136213	148	44136149	15.53	12.871	7.7218	8.58244	FTE2_peak_1124	chr12_44136066_44136213	MIR1244-1;MIR1244-2;MIR1244-3;PUS7L	.	IRAK4
chr12	46613787	46613901	115	46613811	11.83	8.44993	5.9945	4.59841	FTE2_peak_1125	chr12_46613787_46613901	MIR1244-1;MIR1244-2;MIR1244-3;SLC38A1	.	.
chr12	46750858	46752183	1326	46751561	31.8	26.6287	10.9334	21.4449	FTE2_peak_1126	chr12_46750858_46752183	MIR1244-1;MIR1244-2;MIR1244-3;SLC38A2	.	.
chr12	46753112	46753248	137	46753146	14.05	11.7222	7.03088	7.52556	FTE2_peak_1127	chr12_46753112_46753248	MIR1244-1;MIR1244-2;MIR1244-3;SLC38A2	.	.
chr12	46753513	46753740	228	46753581	13.31	10.6011	6.68542	6.55065	FTE2_peak_1128	chr12_46753513_46753740	MIR1244-1;MIR1244-2;MIR1244-3;SLC38A2	.	.
chr12	46757375	46757605	231	46757505	11.09	8.44993	5.64904	4.59841	FTE2_peak_1129	chr12_46757375_46757605	MIR1244-1;MIR1244-2;MIR1244-3;SLC38A2	.	.
chr12	46757845	46758147	303	46758058	13.31	10.5556	6.65661	6.55065	FTE2_peak_1130	chr12_46757845_46758147	MIR1244-1;MIR1244-2;MIR1244-3;SLC38A2	.	.
chr12	46759186	46759309	124	46759230	17.01	15.2456	8.41272	10.7426	FTE2_peak_1131	chr12_46759186_46759309	MIR1244-1;MIR1244-2;MIR1244-3;SLC38A2	.	.
chr12	46759409	46759858	450	46759453	11.83	8.44993	5.9945	4.59841	FTE2_peak_1132	chr12_46759409_46759858	MIR1244-1;MIR1244-2;MIR1244-3;SLC38A2	.	.
chr12	46760157	46760536	380	46760430	14.05	11.7222	7.03088	7.52556	FTE2_peak_1133	chr12_46760157_46760536	MIR1244-1;MIR1244-2;MIR1244-3;SLC38A2	.	.
chr12	46763751	46763974	224	46763919	19.23	12.1392	6.15114	7.92954	FTE2_peak_1134	chr12_46763751_46763974	MIR1244-1;MIR1244-2;MIR1244-3;SLC38A2	.	.
chr12	46797134	46797358	225	46797178	11.09	8.44993	5.64904	4.59841	FTE2_peak_1135	chr12_46797134_46797358	MIR1244-1;MIR1244-2;MIR1244-3	.	.
chr12	46824338	46824452	115	46824413	14.79	10.1038	6.32897	6.12882	FTE2_peak_1136	chr12_46824338_46824452	MIR1244-1;MIR1244-2;MIR1244-3	.	.
chr12	46888280	46888443	164	46888362	16.27	14.046	8.06726	9.66458	FTE2_peak_1137	chr12_46888280_46888443	MIR1244-1;MIR1244-2;MIR1244-3	.	.
chr12	46947229	46947425	197	46947337	10.35	7.42451	5.30358	3.76232	FTE2_peak_1138	chr12_46947229_46947425	MIR1244-1;MIR1244-2;MIR1244-3	.	.
chr12	46956690	46956806	117	46956780	13.31	7.53305	4.77057	3.8596	FTE2_peak_1139	chr12_46956690_46956806	MIR1244-1;MIR1244-2;MIR1244-3	.	.
chr12	47167898	47168140	243	47168052	19.97	17.7137	9.79456	13.001	FTE2_peak_1140	chr12_47167898_47168140	MIR1244-1;MIR1244-2;MIR1244-3;SLC38A4	.	.
chr12	47489638	47489836	199	47489727	17.01	6.60524	3.60188	3.05596	FTE2_peak_1141	chr12_47489638_47489836	MIR1244-1;MIR1244-2;MIR1244-3	AMIGO2	.
chr12	47585729	47585979	251	47585962	11.09	8.44993	5.64904	4.59841	FTE2_peak_1142	chr12_47585729_47585979	MIR1244-1;MIR1244-2;MIR1244-3	MIR4698	FAM113B;LOC100233209
chr12	47672024	47672138	115	47672062	15.53	12.871	7.7218	8.58244	FTE2_peak_1143	chr12_47672024_47672138	MIR1244-1;MIR1244-2;MIR1244-3	.	.
chr12	49520639	49520975	337	49520876	17.01	9.00107	4.78974	5.12854	FTE2_peak_1144	chr12_49520639_49520975	MIR1244-1;MIR1244-2;MIR1244-3	LMBR1L	TUBA1B
chr12	49616451	49616614	164	49616516	20.71	15.4496	7.96591	10.9354	FTE2_peak_1145	chr12_49616451_49616614	MIR1244-1;MIR1244-2;MIR1244-3	.	.
chr12	49901004	49901151	148	49901107	17.01	11.2084	6.00314	7.11989	FTE2_peak_1146	chr12_49901004_49901151	MIR1244-1;MIR1244-2;MIR1244-3;SPATS2	.	.
chr12	50581047	50581206	160	50581128	20.71	15.9712	8.28041	11.4381	FTE2_peak_1147	chr12_50581047_50581206	LIMA1;MIR1244-1;MIR1244-2;MIR1244-3	CERS5	.
chr12	50784153	50784414	262	50784245	24.4	19.5287	9.05536	14.7268	FTE2_peak_1148	chr12_50784153_50784414	FAM186A;MIR1244-1;MIR1244-2;MIR1244-3	.	LARP4
chr12	50790425	50790594	170	50790522	18.49	10.5988	5.59371	6.55065	FTE2_peak_1149	chr12_50790425_50790594	MIR1244-1;MIR1244-2;MIR1244-3	FAM186A	LARP4
chr12	52081503	52081686	184	52081558	11.09	8.44993	5.64904	4.59841	FTE2_peak_1150	chr12_52081503_52081686	MIR1244-1;MIR1244-2;MIR1244-3;SCN8A	.	.
chr12	52167304	52167491	188	52167384	23.67	17.4005	8.22176	12.7612	FTE2_peak_1151	chr12_52167304_52167491	MIR1244-1;MIR1244-2;MIR1244-3;SCN8A	.	.
chr12	52674179	52674431	253	52674261	19.97	13.1909	6.98919	8.88208	FTE2_peak_1152	chr12_52674179_52674431	MIR1244-1;MIR1244-2;MIR1244-3	.	KRT81;KRT86
chr12	52674909	52675023	115	52674985	11.83	7.18136	5.14334	3.58896	FTE2_peak_1153	chr12_52674909_52675023	MIR1244-1;MIR1244-2;MIR1244-3	.	KRT81;KRT86
chr12	52679072	52679198	127	52679141	16.27	11.5513	6.53049	7.45141	FTE2_peak_1154	chr12_52679072_52679198	MIR1244-1;MIR1244-2;MIR1244-3	.	KRT81;KRT83;KRT86
[truncated: 4,576 more rows]

## Sheet: 5. FTE1_vs_FTE2
shared_peak	overlap(%)	overlap(nt)	FTE1_peak	FTE1_peak_pos	FTE1_peak_length	FTE2_peak	FTE2_peak_pos	FTE2_peak_length	shared_peak_coordinate	thislocation	upsteam	dnstream
[truncated: 3,396 more rows]

[truncated: 5 more sheets: 6. OSE1, 7. OSE2, 8. OSE1_vs_OSE2, 9. FTE_OSE, 10. Panther GO analysis]
