# Supplementary material for: Functional Analysis and Fine Mapping of the 9p22.2 Ovarian Cancer Susceptibility Locus
Source: Oxford University Press journal article supplement (doi:10.1158/0008-5472.can-17-3864), 2018-11-28
Supplement: 00085472can173864-sup-194003_3_supp_4928074_pcp4jb.xlsx [file 00085472can173864-sup-194003_3_supp_4928074_pcp4jb.xlsx]

## Sheet: Supplementary Table 1
Primer Name	Sequence (5'- 3')	Assay
T5 FWD	attb-TAAGTAGAGACGGGGTTTCA	Tiling Clones at 9p22 Locus
T5 REV	attb-CTGATGGACCATTCTTCACT	Tiling Clones at 9p22 Locus
T6 FWD	attb-GGTGGAAAGCAAACTAAATG	Tiling Clones at 9p22 Locus
T6 REV	attb-TAGTTCTGTTGTGCAGGTTG	Tiling Clones at 9p22 Locus
T7.1 FWD	attb-TGGGGGTTTTCATTGCCAGG	Tiling Clones at 9p22 Locus
T7.1 REV	attb-GACTCGACGATGTGCTGTCC	Tiling Clones at 9p22 Locus
T7.2 FWD	attb-GTGAAGCTGCACAGACACTA	Tiling Clones at 9p22 Locus
T7.2 REV	attb-CAGAATGTTGCACAAAAAGA	Tiling Clones at 9p22 Locus
T7.3 FWD	attb-TCTTTTTGTGCAACATTCTG	Tiling Clones at 9p22 Locus
T7.3 REV	attb-ATTAAGTTGGGTGGTGTTTG	Tiling Clones at 9p22 Locus
T7.4 FWD	attb-ACCGTGCTGAACCCTTAACT	Tiling Clones at 9p22 Locus
T7.4 REV	attb-GAGCCCAGGACTGTGGTTAC	Tiling Clones at 9p22 Locus
T7.5 FWD	attb-CTCTGCTTTTGTCTGCTTCT	Tiling Clones at 9p22 Locus
T7.5 REV	attb-GGACCTACGGGAACTTTTAC	Tiling Clones at 9p22 Locus
T7.6 FWD	attb-ATTCCGAATGTGAAGACAAG	Tiling Clones at 9p22 Locus
T7.6 REV	attb-TTTTCACTAGGAACCGGTAA	Tiling Clones at 9p22 Locus
T7.7 FWD	attb-GTGCAAGCCCCACAAGTTTT	Tiling Clones at 9p22 Locus
T7.7 REV	attb-GATGCAACCTGTCCCCAGAA	Tiling Clones at 9p22 Locus
T7.8 FWD	attb-TCTCCGAGTTATGCAGATTT	Tiling Clones at 9p22 Locus
T7.8 REV	attb-GAGCTTTGCAAGTTAGAGGA	Tiling Clones at 9p22 Locus
T8 FWD	attb-AGAGACAACCCAAGATAGCA	Tiling Clones at 9p22 Locus
T8 REV	attb-CCAATGACGAAATGTATGTG	Tiling Clones at 9p22 Locus
T11 FWD	attb-GGGTGGGGGTGAGGATGATA	Tiling Clones at 9p22 Locus
T11 REV	attb-TTTGCCTGTAGTGGGTGCTC	Tiling Clones at 9p22 Locus
T12 FWD	attb-TGCCTGGCTTAGTCTTTATT	Tiling Clones at 9p22 Locus
T12 REV	attb-AGGAGAAGGAATAGCTGCTT	Tiling Clones at 9p22 Locus
TC FWD	attb-GAATATGACTGGCACCACTT	Tiling Clones at 9p22 Locus
TC REV	attb-AATAAAGACTAAGCCAGGCA	Tiling Clones at 9p22 Locus
rs62541878 sense	tatctctacaaaatatatatatatatatatataaatttaccaggcatcgtggcttgc	Site Directed Mutagenesis
rs62541878 antisense	gcaagccacgatgcctggtaaatttatatatatatatatatatattttgtagagata	Site Directed Mutagenesis
rs62541920 sense	atacatacacagtgagtcatttaagagtttcacattctgccttc	Site Directed Mutagenesis
rs62541920 antisense	gaaggcagaatgtgaaactcttaaatgactcactgtgtatgtat	Site Directed Mutagenesis
rs12379183 sense	tcaaagagaaaatagagcaaaaagaacaaaactgatgttgttatgtacggatattt	Site Directed Mutagenesis
rs12379183 antisense	aaatatccgtacataacaacatcagttttgttctttttgctctattttctctttga	Site Directed Mutagenesis
rs10962647 sense	tcagctctgcttttgtctgctgctttttgtaatcacatatctc	Site Directed Mutagenesis
rs10962647 antisense	gagatatgtgattacaaaaagcagcagacaaaagcagagctga	Site Directed Mutagenesis
rs62541922 sense	ccagccgccggcccctcactcgg	Site Directed Mutagenesis
rs62541922 antisense	ccgagtgaggggccggcggctgg	Site Directed Mutagenesis
rs62541923 sense	ggtccccggccagccctcctcag	Site Directed Mutagenesis
rs62541923 antisense	ctgaggagggctggccggggacc	Site Directed Mutagenesis
rs200648906 sense	cagctgtcacacacacacgaaaaaaaaattgcggggc	Site Directed Mutagenesis
rs200648906 antisense	gccccgcaatttttttttcgtgtgtgtgtgacagctg	Site Directed Mutagenesis
rs10810657 sense	cttcgttacacagcatatatctgcacccctgcc	Site Directed Mutagenesis
rs10810657 antisense	ggcaggggtgcagatatatgctgtgtaacgaag	Site Directed Mutagenesis
rs12350739 sense	gtgctgctgatctcatgcccttcctctgg	Site Directed Mutagenesis
rs12350739 antisense	ccagaggaagggcatgagatcagcagcac	Site Directed Mutagenesis
rs77507622 sense	attccagaaatcattattaggcagtttcttagagcaattcatgggtt	Site Directed Mutagenesis
rs77507622 antisense	aacccatgaattgctctaagaaactgcctaataatgatttctggaat	Site Directed Mutagenesis
rs10810657_Effect A	ATCACTTCGTTACACAGCATATATCTGCACCCCTGCCGGCA	EMSA
rs10810657_Effect T	TGCCGGCAGGGGTGCAGATATATGCTGTGTAACGAAGTGAT	EMSA
rs10810657_Reference T	ATCACTTCGTTACACAGCATTTATCTGCACCCCTGCCGGCA	EMSA
rs10810657_Reference A	TGCCGGCAGGGGTGCAGATAAATGCTGTGTAACGAAGTGAT	EMSA
rs77507622_Reference A	CCAGAAATCATTATTAGGCAATTTCTTAGAGCAATTCATGG	EMSA
rs77507622_Reference T	CCATGAATTGCTCTAAGAAATTGCCTAATAATGATTTCTGG	EMSA
rs77507622_Effect G	CCAGAAATCATTATTAGGCAGTTTCTTAGAGCAATTCATGG	EMSA
rs77507622_Effect C	CCATGAATTGCTCTAAGAAACTGCCTAATAATGATTTCTGG	EMSA
rs12350739_Effect A	TCATCAGTGCTGCTGATCTCATGCCCTTCCTCTGGCAAACC	EMSA
rs12350739_Effect T	GGTTTGCCAGAGGAAGGGCATGAGATCAGCAGCACTGATGA	EMSA
rs12350739_Reference G	TCATCAGTGCTGCTGATCTCGTGCCCTTCCTCTGGCAAACC	EMSA
rs12350739_Reference C	GGTTTGCCAGAGGAAGGGCACGAGATCAGCAGCACTGATGA	EMSA
rs113780397_Effect A	AGATTGAGCCACTGCACTGCATCCTGGGTGACAGAGCGAGA	EMSA
rs113780397_Effect T	TCTCGCTCTGTCACCCAGGATGCAGTGCAGTGGCTCAATCT	EMSA
rs113780397_Reference G	AGATTGAGCCACTGCACTGCGTCCTGGGTGACAGAGCGAGA	EMSA
rs113780397_Reference C	TCTCGCTCTGTCACCCAGGACGCAGTGCAGTGGCTCAATCT	EMSA
rs117224476_Reference T	TATATTATATATAATGTATATATTATATATTATATAATATA	EMSA
rs117224476_Reference A	TATATTATATAATATATAATATATACATTATATATAATATA	EMSA
rs117224476_Effect G	TATATTATATATAATGTATAGATTATATATTATATAATATA	EMSA
rs117224476_Effect C	TATATTATATAATATATAATCTATACATTATATATAATATA	EMSA
rs12379183_Reference A	GCAAAAAGAACAAAACTGATATTGTTATGTACGGATATTTT	EMSA
rs12379183_Reference T	AAAATATCCGTACATAACAATATCAGTTTTGTTCTTTTTGC	EMSA
rs12379183_Effect G	GCAAAAAGAACAAAACTGATGTTGTTATGTACGGATATTTT	EMSA
rs12379183_Effect C	AAAATATCCGTACATAACAACATCAGTTTTGTTCTTTTTGC	EMSA
rs62541920_Reference G	CATACACAGTGAGTCATTTAGGAGTTTCACATTCTGCCTTC	EMSA
rs62541920_Reference C	GAAGGCAGAATGTGAAACTCCTAAATGACTCACTGTGTATG	EMSA
rs62541920_Effect A	CATACACAGTGAGTCATTTAAGAGTTTCACATTCTGCCTTC	EMSA
rs62541920_Effect T	GAAGGCAGAATGTGAAACTCTTAAATGACTCACTGTGTATG	EMSA
rs10962647_Reference T	CAGCTCTGCTTTTGTCTGCTTCTTTTTGTAATCACATATCT	EMSA
rs10962647_Reference A	AGATATGTGATTACAAAAAGAAGCAGACAAAAGCAGAGCTG	EMSA
rs10962647_Effect G	CAGCTCTGCTTTTGTCTGCTGCTTTTTGTAATCACATATCT	EMSA
rs10962647_Effect C	AGATATGTGATTACAAAAAGCAGCAGACAAAAGCAGAGCTG	EMSA
rs3814113_Major T	CAGGGTACCTGCTCCATATCTTCTGGACCAGTTCTCCAAAC	EMSA
rs3814113_Major A	GTTTGGAGAACTGGTCCAGAAGATATGGAGCAGGTACCCTG	EMSA
rs3814113_minor C	CAGGGTACCTGCTCCATATCCTCTGGACCAGTTCTCCAAAC	EMSA
rs3814113_minor G	GTTTGGAGAACTGGTCCAGAGGATATGGAGCAGGTACCCTG	EMSA
rs181552334­_Major A	ATATATATAATATATATTACATAATATATAATATATATAAT	EMSA
rs181552334­_Major T	ATTATATATATTATATATTATGTAATATATATTATATATAT	EMSA
rs181552334­_minor G	ATATATATAATATATATTACGTAATATATAATATATATAAT	EMSA
rs181552334­_minor C	ATTATATATATTATATATTACGTAATATATATTATATATAT	EMSA
BPR1F	CGCTACCACCACCACATACAT	3C
BPAR1F	GCTCTGAACACGCACAGACA	3C
BPR2R	GGTGGTGCACACCTGTAGAG	3C
BPAR2R	GGGCAATGAGCTGTGTCTCT	3C
9p22BNCEcoF1	ACTTTTGGGTAAAGAGGGACAA	3C
9p22BNCpEcoF2	GCTGGCTTGATGCTATTCCC	3C
9p22BNCpEcoF3	AGCAATTTGTGAAGTACCAGGC	3C
9p22BNCEcoR4	GGTATAGTGAGAAGGGCACCA	3C
9p22BNCEcoR5	AACTGAGACCAGACCACAAGT	3C
9p22BNCEcoF6	CACCGCACCGATCCTGTTT	3C
9p22BNCEcoF7	ACTCCAGTCTGGGCAACAAG	3C
9p22BNCEcoF8	GTCATGAGATCGTGGCTGGG	3C
9p22BNCEcoF9	GGCGTGAAACTTCTTGTTATGTGA	3C
9p22BNCEcoF10	GACTGAGCCTGAAGGAAGGC	3C
9p22BNCEcoF11	ACAGATACCAAGTGCAAACTGC	3C
9p22BNCEcoF12	GGGAGGCTGAGACATGAGAC	3C
9p22BNCEcoR13	CCCCATCTGGGACTTGAAGG	3C
9p22BNCEcoR14	CACCAATAAGCGATCAGCTCC	3C
9p22BNCEcoF15	CAGGGCCAAGAATCTACCGC	3C
9p22BNCEcoR16	GAAAAATCACCTGTGTGGGCA	3C
9p22BNCEcoF17	GCACAAGGCCCTTATTCCCA	3C
9p22BNCEcoF18	TGCCTCTGCCAGAATGATGT	3C
9p22BNCEcoR19	TGTGTCATTGAGTGGTGTTGAT	3C
9p22BNCEcoR20	ATCTCTTGAAGCCAGCCATTT	3C
9p22BNCEcoR21	TGTGAGAGTGCCTCGGTGTA	3C
9p22BNCEcoF22	GGCATGCTGCCACATATTCAG	3C
9p22BNCEcoF23	ACCACAGAGAAGGTGGCAAG	3C
9p22BNCEcoR24	TGTTTCCCTCTCCTCCCCAA	3C
9p22CNTLNEcoF1	CATAGGAGATATACATCAGTTGCCA	3C
9p22CNTLNEcoF2	TGGTGCTTGTAGAGGGGTTTC	3C
9p22CNTLNEcoF3	TGGAGACAGGGTAGCGATCA	3C
9p22CNTLNEcoF4	GCTTAGCACTGGACTCAGCA	3C
9p22CNTLNEcoF5	ACCCAACAAGGCTTGAAACA	3C
9p22CNTLNEcoF6	GGGTTGCTAGAGACTTGGGG	3C
9p22CNTLNEcoF7	ATCTCCTCAGTGGCCTTTGT	3C
9p22CNTLNEcoR8	GCCGAGCCCTCATGATGTAA	3C
1-236 FWD	TAGGATCCAGATGGCACACCTTGGGCCCAC	GAL4-BNC2 Fusion Constructs
1-524 FWD	TAGGATCCAGATGGCACACCTTGGGCCCAC	GAL4-BNC2 Fusion Constructs
1-524 REV	CTGTCGACACTTGCTATGACAGGGGTGG	GAL4-BNC2 Fusion Constructs
385-524 FWD	CAGGATCCGAAATGCCCTGACCAGCATTAC	GAL4-BNC2 Fusion Constructs
385-524 REV	CTGTCGACACTTGCTATGACAGGGGTGG	GAL4-BNC2 Fusion Constructs
519-818 FWD	CAGGATCCCCACCCCTGTCATAGCAAGT	GAL4-BNC2 Fusion Constructs
519-818 REV	CTGTCGACTTTGAGGGCTGCCATAATTC	GAL4-BNC2 Fusion Constructs
818-1099 FWD	GAGGATCCTGAATTATGGCAGCCCTCAAA	GAL4-BNC2 Fusion Constructs
818-1099 REV	AAGTCGACCTAATCTACTGAAGTGAAGG	GAL4-BNC2 Fusion Constructs
951-1099 FWD	GAGGATCCGGAGAGGCATGGCAGAGGACTA	GAL4-BNC2 Fusion Constructs
951-1099 REV	AAGTCGACCTAATCTACTGAAGTGAAGG	GAL4-BNC2 Fusion Constructs
1-1099 FWD	TAGGATCCAGATGGCACACCTTGGGCCCAC	GAL4-BNC2 Fusion Constructs
1-1099 REV	AAGTCGACCTAATCTACTGAAGTGAAGG	GAL4-BNC2 Fusion Constructs
BNC2 ZF 1,2 FWD	GGGGACAAGTTTGTACAAAAAAGCAGGCTTCCAGAATTCTGCCCCAGTCAGTG	ZF Protein Constructs
BNC2 ZF 1,2 REV	GGGGACCACTTTGTACAAGAAAGCTGGGTCCTATACTAGCTGGCTAGGGAGAGGA	ZF Protein Constructs
BNC2 ZF 3,4 FWD	GGGGACAAGTTTGTACAAAAAAGCAGGCTTCGACATGTTTTACATGAGCCAGT	ZF Protein Constructs
BNC2 ZF 3,4 REV	GGGGACCACTTTGTACAAGAAAGCTGGGTCCTAGTTCAGGTGGGAGTCTTCAGTC	ZF Protein Constructs
BNC2 ZF 5,6 FWD	GGGGACAAGTTTGTACAAAAAAGCAGGCTTCAGAGGCATGGCAGAGGACTA	ZF Protein Constructs
BNC2 ZF 5,6 REV	GGGGACCACTTTGTACAAGAAAGCTGGGTCCTAATCTACTGAAGTGAAGGGAA	ZF Protein Constructs
"-2184 FWD	CCTGCAGATGCAACCTGTCCCC	Site Specific ChIP at BNC2 Promoter
"-2184 REV	TCTGCATTCGTGGATTCTGTGCAT	Site Specific ChIP at BNC2 Promoter
"-914 FWD	GCACAAAACGCTCCGCCACC	Site Specific ChIP at BNC2 Promoter
"-914 REV	GGCGGAGGAAAACCCAGCGG	Site Specific ChIP at BNC2 Promoter
"-582 FWD	TTCCTCGGCGTTTCGCAGCC	Site Specific ChIP at BNC2 Promoter
"-582 REV	GCGGGCGTGGAGGTAGAGGT	Site Specific ChIP at BNC2 Promoter
