# Supplementary material for: Functional Analysis and Fine Mapping of the 9p22.2 Ovarian Cancer Susceptibility Locus
Source: Oxford University Press journal article supplement (doi:10.1158/0008-5472.can-17-3864), 2018-11-28
Supplement: 00085472can173864-sup-194003_3_supp_4928079_pcp4jc.xlsx [file 00085472can173864-sup-194003_3_supp_4928079_pcp4jc.xlsx]

## Sheet: 4 GENE eQTL all tissues
Gencode Id	Gene Symbol	Variant Id	SNP Id	P-Value	NES	Tissue
ENSG00000173068.13	BNC2	9_16212992_A_G_b37	rs10125444	3.4e-20	0.47	Thyroid
ENSG00000173068.13	BNC2	9_16210867_A_G_b37	rs10123661	3.1e-16	0.44	Thyroid
ENSG00000173068.13	BNC2	9_16214340_A_C_b37	rs9298749	1.8e-15	0.41	Thyroid
ENSG00000173068.13	BNC2	9_16211137_T_C_b37	rs7044238	6.4e-15	0.42	Thyroid
ENSG00000173068.13	BNC2	9_16211135_C_T_b37	rs10118271	7.3e-15	0.42	Thyroid
ENSG00000173068.13	BNC2	9_16211392_A_G_b37	rs4961672	3.1e-14	0.41	Thyroid
ENSG00000173068.13	BNC2	9_16211366_C_A_b37	rs4961671	1.7e-11	0.36	Thyroid
ENSG00000173068.13	BNC2	9_16212607_A_AGAAAT_b37	rs201682161	2e-11	0.38	Thyroid
ENSG00000173068.13	BNC2	9_16210163_T_G_b37	rs1412539	1.1e-10	0.39	Thyroid
ENSG00000173068.13	BNC2	9_16212321_G_C_b37	rs12553066	3.4e-10	0.35	Thyroid
ENSG00000173068.13	BNC2	9_16208283_T_C_b37	rs914654	1.2e-09	0.33	Thyroid
ENSG00000173068.13	BNC2	9_16877254_C_G_b37	rs4612477	6.8e-09	-0.31	Muscle - Skeletal
ENSG00000173068.13	BNC2	9_16877758_C_T_b37	rs10810656	7.8e-09	-0.31	Muscle - Skeletal
ENSG00000173068.13	BNC2	9_16212766_T_C_b37	rs10511616	1e-08	0.38	Thyroid
ENSG00000173068.13	BNC2	9_16208454_G_C_b37	rs12351507	1.8e-08	0.35	Thyroid
ENSG00000173068.13	BNC2	9_16876998_T_C_b37	rs10810654	2.8e-08	-0.3	Muscle - Skeletal
ENSG00000173068.13	BNC2	9_16877362_C_T_b37	rs10962654	2.8e-08	-0.3	Muscle - Skeletal
ENSG00000173068.13	BNC2	9_16877368_C_A_b37	rs10962655	2.8e-08	-0.3	Muscle - Skeletal
ENSG00000173068.13	BNC2	9_16877987_A_G_b37	rs7046433	2.8e-08	-0.3	Muscle - Skeletal
ENSG00000173068.13	BNC2	9_16880465_A_G_b37	rs1981224	2.8e-08	-0.3	Muscle - Skeletal
ENSG00000173068.13	BNC2	9_16903366_G_A_b37	rs10738466	3.2e-08	0.18	Whole Blood
ENSG00000173068.13	BNC2	9_16208482_C_CCT_b37	rs80079889	4.5e-08	0.33	Thyroid
ENSG00000173068.13	BNC2	9_16208483_A_T_b37	rs62547350	4.5e-08	0.33	Thyroid
ENSG00000173068.13	BNC2	9_16874612_C_T_b37	rs10962650	1.1e-07	0.18	Whole Blood
ENSG00000173068.13	BNC2	9_16208359_AT_A_b37	rs796309761	1.3e-07	0.33	Thyroid
ENSG00000173068.13	BNC2	9_16877138_G_C_b37	rs10810655	1.4e-07	0.18	Whole Blood
ENSG00000173068.13	BNC2	9_16876769_GGTGCTGATTGGTGTGTTTACAAACTTTGAGCTAGATACAGA_G_b37	rs746381956	1.6e-07	0.18	Whole Blood
ENSG00000173068.13	BNC2	9_16876283_G_A_b37	rs10810652	1.6e-07	0.18	Whole Blood
ENSG00000173068.13	BNC2	9_16873551_C_T_b37	rs10810650	1.8e-07	0.18	Whole Blood
ENSG00000173068.13	BNC2	9_16881256_T_G_b37	rs7025549	2.1e-07	0.17	Whole Blood
ENSG00000173068.13	BNC2	9_16881373_C_T_b37	rs7040151	2.1e-07	0.17	Whole Blood
ENSG00000173068.13	BNC2	9_16881877_C_A_b37	rs12345776	2.1e-07	0.17	Whole Blood
ENSG00000173068.13	BNC2	9_16878493_G_A_b37	rs10122763	2.8e-07	0.17	Whole Blood
ENSG00000173068.13	BNC2	9_16882916_C_G_b37	rs4644350	3.5e-07	0.17	Whole Blood
ENSG00000173068.13	BNC2	9_16210062_A_G_b37	rs7851398	3.5e-07	0.38	Thyroid
ENSG00000173068.13	BNC2	9_16890517_C_T_b37	rs2153272	4.4e-07	-0.27	Muscle - Skeletal
ENSG00000173068.13	BNC2	9_16900765_C_T_b37	rs36116821	4.5e-07	0.17	Whole Blood
ENSG00000173068.13	BNC2	9_16898119_G_A_b37	rs10962672	4.5e-07	0.17	Whole Blood
ENSG00000173068.13	BNC2	9_16898793_AT_A_b37	rs35194519	4.5e-07	0.17	Whole Blood
ENSG00000173068.13	BNC2	9_16900695_A_G_b37	rs28498684	4.7e-07	0.17	Whole Blood
ENSG00000173068.13	BNC2	9_16887366_T_A_b37	rs3927680	4.9e-07	0.17	Whole Blood
ENSG00000173068.13	BNC2	9_16210330_T_C_b37	rs1412537	5.7e-07	0.32	Thyroid
ENSG00000173068.13	BNC2	9_16863364_T_C_b37	rs62541919	5.8e-07	0.17	Whole Blood
ENSG00000173068.13	BNC2	9_16903850_A_G_b37	rs10810661	6e-07	0.17	Whole Blood
ENSG00000173068.13	BNC2	9_16894140_T_C_b37	rs10962668	6.3e-07	0.17	Whole Blood
ENSG00000173068.13	BNC2	9_16864521_C_T_b37	rs2153271	6.7e-07	0.16	Whole Blood
ENSG00000173068.13	BNC2	9_16205136_A_G_b37	rs2151062	6.8e-07	0.29	Thyroid
ENSG00000173068.13	BNC2	9_16205165_A_G_b37	rs2151061	6.8e-07	0.29	Thyroid
ENSG00000173068.13	BNC2	9_16203356_A_G_b37	rs79457190	7.3e-07	0.96	Breast - Mammary Tissue
ENSG00000173068.13	BNC2	9_16211084_C_G_b37	rs10118247	9.5e-07	0.36	Thyroid
ENSG00000173068.13	BNC2	9_16884586_T_A_b37	rs10810657	1e-06	0.16	Whole Blood
ENSG00000173068.13	BNC2	9_16212947_A_AATT_b37	rs201239981	1.2e-06	0.35	Thyroid
ENSG00000173068.13	BNC2	9_16909110_A_G_b37	rs7851204	1.3e-06	-0.16	Whole Blood
ENSG00000173068.13	BNC2	9_16870421_A_G_b37	rs10810649	1.8e-06	-0.37	Muscle - Skeletal
ENSG00000173068.13	BNC2	9_16911665_A_C_b37	rs10465044	1.9e-06	0.16	Whole Blood
ENSG00000173068.13	BNC2	9_16877973_G_C_b37	rs7046749	2.3e-06	-0.29	Muscle - Skeletal
ENSG00000173068.13	BNC2	9_16856883_G_A_b37	rs1416742	2.4e-06	0.16	Whole Blood
ENSG00000173068.13	BNC2	9_16870104_A_G_b37	rs10121817	2.6e-06	-0.37	Muscle - Skeletal
ENSG00000173068.13	BNC2	9_16889937_C_A_b37	rs10962662	3.2e-06	-0.18	Whole Blood
ENSG00000173068.13	BNC2	9_16212179_G_C_b37	rs10119177	3.6e-06	0.28	Thyroid
ENSG00000173068.13	BNC2	9_16849720_C_T_b37	rs10481508	3.7e-06	-0.35	Muscle - Skeletal
ENSG00000173068.13	BNC2	9_16793520_C_T_b37	rs138964001	4.2e-06	2.7	Brain - Spinal cord (cervical c-1)
ENSG00000173068.13	BNC2	9_16216102_A_G_b37	rs17725257	4.2e-06	0.54	Thyroid
ENSG00000173068.13	BNC2	9_16906384_G_C_b37	rs7868594	4.7e-06	-0.26	Muscle - Skeletal
ENSG00000173068.13	BNC2	9_16878616_C_A_b37	rs10756823	5e-06	-0.18	Whole Blood
ENSG00000173068.13	BNC2	9_16891647_C_T_b37	rs10124837	6.3e-06	0.18	Whole Blood
ENSG00000173068.13	BNC2	9_16903415_T_G_b37	rs10733332	6.3e-06	0.2	Whole Blood
ENSG00000173068.13	BNC2	9_16878382_G_C_b37	rs6475091	7.9e-06	-0.34	Muscle - Skeletal
ENSG00000173068.13	BNC2	9_16986112_C_G_b37	rs7029491	8.6e-06	0.16	Artery - Tibial
ENSG00000173068.13	BNC2	9_16242452_A_G_b37	rs7860102	8.6e-06	0.24	Thyroid
ENSG00000173068.13	BNC2	9_16216711_A_G_b37	rs2225556	8.8e-06	0.27	Thyroid
ENSG00000173068.13	BNC2	9_16874907_T_G_b37	rs10810651	9.6e-06	-0.35	Muscle - Skeletal
ENSG00000173068.13	BNC2	9_16229705_A_AAAC_b37	rs35640909	9.7e-06	0.24	Thyroid
ENSG00000173068.13	BNC2	9_16877339_A_C_b37	rs2185272	1.3e-05	-0.34	Muscle - Skeletal
ENSG00000173068.13	BNC2	9_16879179_T_A_b37	rs4422864	1.3e-05	-0.34	Muscle - Skeletal
ENSG00000173068.13	BNC2	9_16877348_C_CG_b37	rs397959556	1.3e-05	-0.33	Muscle - Skeletal
ENSG00000173068.13	BNC2	9_16877354_C_T_b37	rs59717315	1.3e-05	-0.33	Muscle - Skeletal
ENSG00000173068.13	BNC2	9_16878170_T_C_b37	rs6475090	1.3e-05	-0.33	Muscle - Skeletal
ENSG00000173068.13	BNC2	9_16837371_A_G_b37	rs13288423	1.3e-05	-0.28	Thyroid
ENSG00000173068.13	BNC2	9_16846260_A_T_b37	rs1339547	1.5e-05	-0.15	Whole Blood
ENSG00000173068.13	BNC2	9_16208230_T_C_b37	rs12337884	1.6e-05	0.27	Thyroid
ENSG00000173068.13	BNC2	9_16903490_T_G_b37	rs10733334	1.8e-05	0.19	Whole Blood
ENSG00000173068.13	BNC2	9_16225769_A_G_b37	rs9776203	2.3e-05	0.24	Thyroid
ENSG00000173068.13	BNC2	9_16206760_T_G_b37	rs4961670	2.4e-05	0.26	Thyroid
ENSG00000173068.13	BNC2	9_16207913_G_A_b37	rs12350437	2.5e-05	0.32	Thyroid
ENSG00000173068.13	BNC2	9_16876586_G_T_b37	rs4500176	2.6e-05	-0.32	Muscle - Skeletal
ENSG00000173068.13	BNC2	9_16903446_G_A_b37	rs10733333	2.6e-05	0.19	Whole Blood
ENSG00000173068.13	BNC2	9_16848790_C_T_b37	rs1339552	2.7e-05	-0.14	Whole Blood
ENSG00000173068.13	BNC2	9_16902524_G_A_b37	rs4961503	2.7e-05	-0.16	Whole Blood
ENSG00000173068.13	BNC2	9_16849604_G_A_b37	rs10962641	2.9e-05	-0.14	Whole Blood
ENSG00000173068.13	BNC2	9_16913477_T_C_b37	rs7043675	2.9e-05	-0.29	Whole Blood
ENSG00000173068.13	BNC2	9_16894953_C_T_b37	rs4436220	4.3e-05	-0.27	Muscle - Skeletal
ENSG00000173068.13	BNC2	9_16878495_C_G_b37	rs7847725	5.1e-05	-0.32	Muscle - Skeletal
ENSG00000173068.13	BNC2	9_16875283_CG_C_b37	rs796887614	5.1e-05	-0.3	Muscle - Skeletal
ENSG00000107295.8	SH3GL2	9_17615939_G_T_b37	rs2038519	2.5e-33	0.65	Thyroid
ENSG00000107295.8	SH3GL2	9_17620244_G_A_b37	rs7851916	2.7e-32	0.64	Thyroid
ENSG00000107295.8	SH3GL2	9_17620329_C_T_b37	rs7851834	2.7e-32	0.64	Thyroid
ENSG00000107295.8	SH3GL2	9_17620497_G_A_b37	rs7852205	3.9e-32	0.63	Thyroid
ENSG00000107295.8	SH3GL2	9_17619640_G_A_b37	rs7870195	5.8e-31	0.63	Thyroid
ENSG00000107295.8	SH3GL2	9_17618048_G_T_b37	rs3780247	2.2e-30	0.62	Thyroid
ENSG00000107295.8	SH3GL2	9_17619318_T_A_b37	rs7855907	7.2e-30	0.62	Thyroid
ENSG00000107295.8	SH3GL2	9_17618271_C_T_b37	rs3780245	2e-29	0.61	Thyroid
ENSG00000107295.8	SH3GL2	9_17620334_G_T_b37	rs7852041	2e-29	0.61	Thyroid
ENSG00000107295.8	SH3GL2	9_17618657_T_A_b37	rs2038520	6.2e-28	0.6	Thyroid
ENSG00000107295.8	SH3GL2	9_17627654_G_A_b37	rs75448047	3.1e-27	0.79	Thyroid
ENSG00000107295.8	SH3GL2	9_17615601_C_T_b37	rs2038518	3.7e-27	0.74	Thyroid
ENSG00000107295.8	SH3GL2	9_17615353_T_G_b37	rs2383038	5e-27	-0.59	Thyroid
ENSG00000107295.8	SH3GL2	9_17624151_G_A_b37	rs78052987	3.4e-26	0.76	Thyroid
ENSG00000107295.8	SH3GL2	9_17624126_G_A_b37	rs73642002	7.1e-25	0.72	Thyroid
ENSG00000107295.8	SH3GL2	9_17626180_T_C_b37	rs6475157	7.1e-25	0.72	Thyroid
ENSG00000107295.8	SH3GL2	9_17622938_G_C_b37	rs7033680	1.4e-24	0.72	Thyroid
ENSG00000107295.8	SH3GL2	9_17622213_G_A_b37	rs3808750	1.6e-24	0.57	Thyroid
ENSG00000107295.8	SH3GL2	9_17626616_C_T_b37	rs3808747	1.8e-24	0.72	Thyroid
ENSG00000107295.8	SH3GL2	9_17624228_C_T_b37	rs73645103	5.6e-24	0.72	Thyroid
ENSG00000107295.8	SH3GL2	9_17622769_A_G_b37	rs7033092	5.9e-24	0.72	Thyroid
ENSG00000107295.8	SH3GL2	9_17626452_C_T_b37	rs3824387	8.3e-24	0.57	Thyroid
ENSG00000107295.8	SH3GL2	9_17626350_C_G_b37	rs7847429	1.9e-23	0.7	Thyroid
ENSG00000107295.8	SH3GL2	9_17626762_T_C_b37	rs3808746	1.9e-23	0.7	Thyroid
ENSG00000107295.8	SH3GL2	9_17627213_C_G_b37	rs3780242	4e-23	0.77	Thyroid
ENSG00000107295.8	SH3GL2	9_17615153_G_A_b37	rs941790	2.6e-16	0.63	Thyroid
ENSG00000107295.8	SH3GL2	9_17533124_T_A_b37	rs34165460	1.9e-15	0.3	Stomach
ENSG00000107295.8	SH3GL2	9_17540456_A_C_b37	rs13301671	3.5e-15	0.29	Stomach
ENSG00000107295.8	SH3GL2	9_17540507_C_T_b37	rs13301942	5.7e-15	0.29	Stomach
ENSG00000107295.8	SH3GL2	9_17554809_C_T_b37	rs7043190	5.7e-15	0.28	Stomach
ENSG00000107295.8	SH3GL2	9_17546277_G_A_b37	rs12380405	6.4e-15	0.29	Stomach
ENSG00000107295.8	SH3GL2	9_17556922_A_T_b37	rs55760530	7.5e-15	0.28	Stomach
ENSG00000107295.8	SH3GL2	9_17538562_A_G_b37	rs11789256	9.4e-15	0.28	Stomach
ENSG00000107295.8	SH3GL2	9_17541186_C_T_b37	rs11732333	9.4e-15	0.28	Stomach
ENSG00000107295.8	SH3GL2	9_17541246_A_G_b37	rs56100724	9.4e-15	0.28	Stomach
ENSG00000107295.8	SH3GL2	9_17548470_T_G_b37	rs10963135	9.4e-15	0.28	Stomach
ENSG00000107295.8	SH3GL2	9_17551392_T_C_b37	rs34817792	9.4e-15	0.28	Stomach
ENSG00000107295.8	SH3GL2	9_17532000_A_G_b37	rs10963125	1.2e-14	0.27	Stomach
ENSG00000107295.8	SH3GL2	9_17546812_C_T_b37	rs12380444	1.2e-14	0.28	Stomach
ENSG00000107295.8	SH3GL2	9_17628726_C_G_b37	rs1001265	1.3e-14	-0.48	Thyroid
ENSG00000107295.8	SH3GL2	9_17557152_A_G_b37	rs34622594	1.5e-14	0.27	Stomach
ENSG00000107295.8	SH3GL2	9_17535550_G_A_b37	rs13283993	1.5e-14	0.29	Stomach
ENSG00000107295.8	SH3GL2	9_17537911_T_C_b37	rs34816089	1.5e-14	0.29	Stomach
ENSG00000107295.8	SH3GL2	9_17532020_C_T_b37	rs10963126	1.7e-14	0.28	Stomach
ENSG00000107295.8	SH3GL2	9_17532049_T_C_b37	rs10963127	1.7e-14	0.28	Stomach
ENSG00000107295.8	SH3GL2	9_17539427_C_G_b37	rs62559788	2.1e-14	0.28	Stomach
ENSG00000107295.8	SH3GL2	9_17547664_A_G_b37	rs10963134	2.1e-14	0.28	Stomach
ENSG00000107295.8	SH3GL2	9_17549327_C_A_b37	rs10963136	2.9e-14	0.28	Stomach
ENSG00000107295.8	SH3GL2	9_17549433_A_C_b37	rs10963137	2.9e-14	0.28	Stomach
ENSG00000107295.8	SH3GL2	9_17617409_T_C_b37	rs9407816	4e-14	-0.48	Thyroid
ENSG00000107295.8	SH3GL2	9_17545712_G_T_b37	rs34672755	4e-14	0.28	Stomach
ENSG00000107295.8	SH3GL2	9_17547427_T_G_b37	rs10963133	4e-14	0.28	Stomach
ENSG00000107295.8	SH3GL2	9_17531059_T_G_b37	rs11791273	4.2e-14	0.27	Stomach
ENSG00000107295.8	SH3GL2	9_17561409_C_T_b37	rs11789277	4.8e-14	0.28	Stomach
ENSG00000107295.8	SH3GL2	9_17553130_C_T_b37	rs10963139	5.3e-14	0.27	Stomach
ENSG00000107295.8	SH3GL2	9_17532172_G_GT_b37	rs398113307	5.6e-14	0.28	Stomach
ENSG00000107295.8	SH3GL2	9_17544536_AC_A_b37	rs376996689	5.6e-14	0.29	Stomach
ENSG00000107295.8	SH3GL2	9_17618365_A_T_b37	rs3780244	6.3e-14	-0.48	Thyroid
ENSG00000107295.8	SH3GL2	9_17532251_A_C_b37	rs7851436	6.6e-14	0.27	Stomach
ENSG00000107295.8	SH3GL2	9_17622897_G_A_b37	rs9407817	6.8e-14	-0.49	Thyroid
ENSG00000107295.8	SH3GL2	9_17615527_C_T_b37	rs9406678	7.5e-14	-0.49	Thyroid
ENSG00000107295.8	SH3GL2	9_17530730_T_C_b37	rs10810800	1e-13	0.27	Stomach
ENSG00000107295.8	SH3GL2	9_17546689_C_G_b37	rs12380429	1.1e-13	0.27	Stomach
ENSG00000107295.8	SH3GL2	9_17550986_CT_C_b37	rs796907052	1.1e-13	0.27	Stomach
ENSG00000107295.8	SH3GL2	9_17623318_C_T_b37	rs9407819	1.1e-13	-0.49	Thyroid
ENSG00000107295.8	SH3GL2	9_17542361_C_A_b37	rs11521307	1.2e-13	0.27	Stomach
ENSG00000107295.8	SH3GL2	9_17623315_T_C_b37	rs9407818	1.7e-13	-0.48	Thyroid
ENSG00000107295.8	SH3GL2	9_17533845_T_C_b37	rs10810802	2e-13	0.27	Stomach
ENSG00000107295.8	SH3GL2	9_17621965_A_C_b37	rs1555422	2.4e-13	-0.48	Thyroid
ENSG00000107295.8	SH3GL2	9_17533996_T_C_b37	rs10810803	2.6e-13	0.27	Stomach
ENSG00000107295.8	SH3GL2	9_17566654_A_C_b37	rs12375842	3.2e-13	0.27	Stomach
ENSG00000107295.8	SH3GL2	9_17545555_C_G_b37	rs13290210	3.8e-13	0.28	Stomach
ENSG00000107295.8	SH3GL2	9_17536890_G_C_b37	rs11792169	4.3e-13	0.26	Stomach
ENSG00000107295.8	SH3GL2	9_17540608_C_T_b37	rs9717446	1.1e-12	0.26	Stomach
ENSG00000107295.8	SH3GL2	9_17539320_T_C_b37	rs7866802	1.2e-12	0.25	Stomach
ENSG00000107295.8	SH3GL2	9_17539397_A_T_b37	rs7851266	1.2e-12	0.25	Stomach
ENSG00000107295.8	SH3GL2	9_17541051_A_G_b37	rs55998352	1.2e-12	0.25	Stomach
ENSG00000107295.8	SH3GL2	9_17539724_T_C_b37	rs7867259	2e-12	0.25	Stomach
ENSG00000107295.8	SH3GL2	9_17539743_A_G_b37	rs7851731	2e-12	0.25	Stomach
ENSG00000107295.8	SH3GL2	9_17539232_A_T_b37	rs7851130	3e-12	0.25	Stomach
ENSG00000107295.8	SH3GL2	9_17531968_T_C_b37	rs2593371	3.1e-12	-0.25	Stomach
ENSG00000107295.8	SH3GL2	9_17533610_G_T_b37	rs10810801	4.8e-12	0.27	Stomach
ENSG00000107295.8	SH3GL2	9_17536450_A_G_b37	rs2593376	6.1e-12	-0.25	Stomach
ENSG00000107295.8	SH3GL2	9_17553181_T_C_b37	rs1555424	8.4e-12	-0.24	Stomach
ENSG00000107295.8	SH3GL2	9_17553320_T_C_b37	rs1555425	1.1e-11	-0.24	Stomach
ENSG00000107295.8	SH3GL2	9_17537070_A_C_b37	rs2593381	1.2e-11	-0.24	Stomach
ENSG00000107295.8	SH3GL2	9_17557130_C_T_b37	rs2593405	1.4e-11	-0.24	Stomach
ENSG00000107295.8	SH3GL2	9_17525742_T_C_b37	rs7350221	1.5e-11	0.26	Stomach
ENSG00000107295.8	SH3GL2	9_17554647_G_A_b37	rs2754330	1.8e-11	-0.23	Stomach
ENSG00000107295.8	SH3GL2	9_17540623_G_A_b37	rs2754320	1.8e-11	-0.23	Stomach
ENSG00000107295.8	SH3GL2	9_17549811_C_T_b37	rs2754329	2e-11	-0.23	Stomach
ENSG00000107295.8	SH3GL2	9_17539291_A_G_b37	rs10756889	2.1e-11	-0.23	Stomach
ENSG00000107295.8	SH3GL2	9_17532840_T_C_b37	rs2593373	2.3e-11	-0.24	Stomach
ENSG00000107295.8	SH3GL2	9_17534866_T_C_b37	rs2593375	2.6e-11	-0.24	Stomach
ENSG00000107295.8	SH3GL2	9_17548356_A_T_b37	rs2475056	2.7e-11	-0.23	Stomach
ENSG00000107295.8	SH3GL2	9_17535634_A_AGTCG_b37	rs398073457	2.7e-11	-0.24	Stomach
ENSG00000107295.8	SH3GL2	9_17555534_A_G_b37	rs2593407	2.8e-11	-0.23	Stomach
ENSG00000107295.8	SH3GL2	9_17545124_G_A_b37	rs36152474	2.9e-11	-0.23	Stomach
ENSG00000107295.8	SH3GL2	9_17533208_G_C_b37	rs2593374	3e-11	-0.24	Stomach
ENSG00000107295.8	SH3GL2	9_17574710_C_T_b37	rs11793646	3.1e-11	0.25	Stomach
ENSG00000107295.8	SH3GL2	9_17571349_CA_C_b37	rs397894527	3.1e-11	0.25	Stomach
ENSG00000107295.8	SH3GL2	9_17545235_C_A_b37	rs36187842	3.3e-11	-0.23	Stomach
ENSG00000107295.8	SH3GL2	9_17539612_G_A_b37	rs2754318	3.3e-11	-0.23	Stomach
ENSG00000107295.8	SH3GL2	9_17545158_G_C_b37	rs36145543	3.3e-11	-0.23	Stomach
ENSG00000107295.8	SH3GL2	9_17552203_A_G_b37	rs55885732	3.5e-11	0.28	Stomach
ENSG00000107295.8	SH3GL2	9_17547833_T_A_b37	rs2754328	4.8e-11	-0.23	Stomach
ENSG00000107295.8	SH3GL2	9_17546373_TAGA_T_b37	rs34609151	5e-11	-0.23	Stomach
ENSG00000107295.8	SH3GL2	9_17546385_A_G_b37	rs1987534	5e-11	-0.23	Stomach
ENSG00000107295.8	SH3GL2	9_17536644_T_G_b37	rs2593377	5.8e-11	-0.23	Stomach
ENSG00000107295.8	SH3GL2	9_17529587_G_T_b37	rs2224454	7e-11	0.27	Stomach
ENSG00000107295.8	SH3GL2	9_17547328_T_C_b37	rs2593384	7.7e-11	-0.23	Stomach
ENSG00000107295.8	SH3GL2	9_17540668_T_C_b37	rs2754321	9.7e-11	-0.23	Stomach
ENSG00000107295.8	SH3GL2	9_17539232_A_T_b37	rs7851130	1e-10	0.29	Lung
ENSG00000107295.8	SH3GL2	9_17557165_G_T_b37	rs2754334	1.1e-10	0.7	Lung
ENSG00000107295.8	SH3GL2	9_17539397_A_T_b37	rs7851266	1.2e-10	0.28	Lung
ENSG00000107295.8	SH3GL2	9_17539320_T_C_b37	rs7866802	1.2e-10	0.28	Lung
ENSG00000107295.8	SH3GL2	9_17541051_A_G_b37	rs55998352	1.2e-10	0.28	Lung
ENSG00000107295.8	SH3GL2	9_17524038_G_T_b37	rs7350278	1.5e-10	0.27	Stomach
ENSG00000107295.8	SH3GL2	9_17525337_T_A_b37	rs6475151	1.8e-10	0.25	Stomach
ENSG00000107295.8	SH3GL2	9_17555531_C_G_b37	rs2593408	3.2e-10	0.68	Lung
ENSG00000107295.8	SH3GL2	9_17624902_A_G_b37	rs3824388	3.3e-10	-0.38	Brain - Cerebellum
ENSG00000107295.8	SH3GL2	9_17539724_T_C_b37	rs7867259	5.3e-10	0.27	Lung
ENSG00000107295.8	SH3GL2	9_17539743_A_G_b37	rs7851731	5.3e-10	0.27	Lung
ENSG00000107295.8	SH3GL2	9_17567908_A_G_b37	rs10963146	6.4e-10	0.22	Stomach
ENSG00000107295.8	SH3GL2	9_17533913_G_C_b37	rs1973964	6.8e-10	0.73	Lung
ENSG00000107295.8	SH3GL2	9_17534326_C_A_b37	rs2145666	6.8e-10	0.73	Lung
ENSG00000107295.8	SH3GL2	9_17570160_TC_T_b37	rs146575257	7.3e-10	0.22	Stomach
ENSG00000107295.8	SH3GL2	9_17563335_C_T_b37	rs2754338	1.1e-09	-0.21	Stomach
ENSG00000107295.8	SH3GL2	9_17579690_T_G_b37	rs13294100	1.2e-09	0.29	Heart - Left Ventricle
ENSG00000107295.8	SH3GL2	9_17624504_G_A_b37	rs10963166	1.3e-09	-0.38	Brain - Cerebellum
ENSG00000107295.8	SH3GL2	9_17614778_A_G_b37	rs77074579	1.3e-09	-0.37	Thyroid
ENSG00000107295.8	SH3GL2	9_17581039_G_A_b37	rs7029216	1.5e-09	0.24	Stomach
ENSG00000107295.8	SH3GL2	9_17624525_AT_A_b37	rs71492924	1.9e-09	-0.37	Brain - Cerebellum
ENSG00000107295.8	SH3GL2	9_17526741_AAATT_A_b37	rs546934620	2e-09	-0.23	Stomach
ENSG00000107295.8	SH3GL2	9_17523684_A_T_b37	rs2593368	2.3e-09	-0.23	Stomach
ENSG00000107295.8	SH3GL2	9_17624157_A_G_b37	rs10963165	3.4e-09	-0.37	Brain - Cerebellum
ENSG00000107295.8	SH3GL2	9_17583288_G_A_b37	rs1033749	4.6e-09	0.23	Stomach
ENSG00000107295.8	SH3GL2	9_17570187_G_A_b37	rs2593392	6.6e-09	0.28	Heart - Left Ventricle
ENSG00000107295.8	SH3GL2	9_17586513_A_G_b37	rs7848676	7.8e-09	0.23	Stomach
ENSG00000107295.8	SH3GL2	9_17569341_C_T_b37	rs2254582	7.8e-09	0.27	Heart - Left Ventricle
ENSG00000107295.8	SH3GL2	9_17627231_T_A_b37	rs1004021	9e-09	-0.41	Thyroid
ENSG00000107295.8	SH3GL2	9_17579761_C_T_b37	rs13292977	9.4e-09	0.24	Stomach
ENSG00000107295.8	SH3GL2	9_17563146_G_T_b37	rs2593402	1.3e-08	-0.2	Stomach
ENSG00000107295.8	SH3GL2	9_17579370_T_C_b37	rs3739487	1.5e-08	-0.2	Stomach
ENSG00000107295.8	SH3GL2	9_17585577_G_A_b37	rs10963152	1.5e-08	0.22	Stomach
ENSG00000107295.8	SH3GL2	9_17523640_T_C_b37	rs2754315	2.3e-08	-0.22	Stomach
ENSG00000107295.8	SH3GL2	9_17553130_C_T_b37	rs10963139	3e-08	0.25	Lung
ENSG00000107295.8	SH3GL2	9_17589448_T_G_b37	rs10963153	3e-08	0.23	Stomach
ENSG00000107295.8	SH3GL2	9_17584274_G_A_b37	rs10756891	3.1e-08	-0.27	Heart - Left Ventricle
ENSG00000107295.8	SH3GL2	9_17544536_AC_A_b37	rs376996689	3.3e-08	0.28	Lung
ENSG00000107295.8	SH3GL2	9_17526168_T_C_b37	rs2593369	3.4e-08	0.56	Lung
ENSG00000107295.8	SH3GL2	9_17580616_A_T_b37	rs8181077	3.5e-08	-0.27	Heart - Left Ventricle
ENSG00000107295.8	SH3GL2	9_17618262_A_G_b37	rs189918221	4e-08	-0.69	Thyroid
ENSG00000107295.8	SH3GL2	9_17559690_T_C_b37	rs2754335	4.2e-08	0.52	Lung
ENSG00000107295.8	SH3GL2	9_17565388_C_A_b37	rs2013982	4.3e-08	-0.19	Stomach
ENSG00000107295.8	SH3GL2	9_17566654_A_C_b37	rs12375842	4.3e-08	0.26	Lung
ENSG00000107295.8	SH3GL2	9_17532251_A_C_b37	rs7851436	5.7e-08	0.26	Lung
ENSG00000107295.8	SH3GL2	9_17549327_C_A_b37	rs10963136	6.1e-08	0.26	Lung
ENSG00000107295.8	SH3GL2	9_17554809_C_T_b37	rs7043190	6.2e-08	0.25	Lung
ENSG00000107295.8	SH3GL2	9_17549433_A_C_b37	rs10963137	7e-08	0.26	Lung
ENSG00000107295.8	SH3GL2	9_17599212_G_A_b37	rs2208485	7.6e-08	-0.27	Heart - Left Ventricle
ENSG00000107295.8	SH3GL2	9_17552093_A_G_b37	rs7860883	8.5e-08	0.53	Lung
ENSG00000107295.8	SH3GL2	9_17546812_C_T_b37	rs12380444	8.8e-08	0.25	Lung
ENSG00000107295.8	SH3GL2	9_17555198_T_A_b37	rs2593409	9.1e-08	0.54	Lung
ENSG00000107295.8	SH3GL2	9_17561409_C_T_b37	rs11789277	9.4e-08	0.25	Lung
ENSG00000107295.8	SH3GL2	9_17546689_C_G_b37	rs12380429	9.7e-08	0.25	Lung
ENSG00000107295.8	SH3GL2	9_17542361_C_A_b37	rs11521307	1e-07	0.25	Lung
ENSG00000107295.8	SH3GL2	9_17545555_C_G_b37	rs13290210	1e-07	0.26	Lung
ENSG00000107295.8	SH3GL2	9_17556922_A_T_b37	rs55760530	1e-07	0.24	Lung
ENSG00000107295.8	SH3GL2	9_17546277_G_A_b37	rs12380405	1e-07	0.25	Lung
ENSG00000107295.8	SH3GL2	9_17624902_A_G_b37	rs3824388	1e-07	-0.4	Brain - Cerebellar Hemisphere
ENSG00000107295.8	SH3GL2	9_17572069_C_T_b37	rs2754341	1.1e-07	0.27	Heart - Left Ventricle
ENSG00000107295.8	SH3GL2	9_17578707_G_C_b37	rs3758216	1.1e-07	0.28	Heart - Left Ventricle
ENSG00000107295.8	SH3GL2	9_17547427_T_G_b37	rs10963133	1.1e-07	0.25	Lung
ENSG00000107295.8	SH3GL2	9_17545712_G_T_b37	rs34672755	1.1e-07	0.25	Lung
ENSG00000107295.8	SH3GL2	9_17536890_G_C_b37	rs11792169	1.2e-07	0.24	Lung
ENSG00000107295.8	SH3GL2	9_17624525_AT_A_b37	rs71492924	1.2e-07	-0.4	Brain - Cerebellar Hemisphere
ENSG00000107295.8	SH3GL2	9_17536805_A_T_b37	rs2593380	1.2e-07	0.52	Lung
ENSG00000107295.8	SH3GL2	9_17538562_A_G_b37	rs11789256	1.3e-07	0.25	Lung
ENSG00000107295.8	SH3GL2	9_17541246_A_G_b37	rs56100724	1.3e-07	0.25	Lung
ENSG00000107295.8	SH3GL2	9_17541186_C_T_b37	rs11732333	1.3e-07	0.25	Lung
ENSG00000107295.8	SH3GL2	9_17539427_C_G_b37	rs62559788	1.3e-07	0.25	Lung
ENSG00000107295.8	SH3GL2	9_17547664_A_G_b37	rs10963134	1.3e-07	0.25	Lung
ENSG00000107295.8	SH3GL2	9_17550986_CT_C_b37	rs796907052	1.6e-07	0.25	Lung
ENSG00000107295.8	SH3GL2	9_17557152_A_G_b37	rs34622594	1.6e-07	0.24	Lung
ENSG00000107295.8	SH3GL2	9_17619611_G_T_b37	rs117657636	1.7e-07	-0.67	Thyroid
ENSG00000107295.8	SH3GL2	9_17624157_A_G_b37	rs10963165	1.7e-07	-0.4	Brain - Cerebellar Hemisphere
ENSG00000107295.8	SH3GL2	9_17532000_A_G_b37	rs10963125	2e-07	0.24	Lung
ENSG00000107295.8	SH3GL2	9_17551392_T_C_b37	rs34817792	2.1e-07	0.24	Lung
ENSG00000107295.8	SH3GL2	9_17548470_T_G_b37	rs10963135	2.1e-07	0.24	Lung
ENSG00000107295.8	SH3GL2	9_17621965_A_C_b37	rs1555422	2.4e-07	0.31	Pituitary
ENSG00000107295.8	SH3GL2	9_17537911_T_C_b37	rs34816089	3.2e-07	0.25	Lung
ENSG00000107295.8	SH3GL2	9_17533124_T_A_b37	rs34165460	3.2e-07	0.25	Lung
ENSG00000107295.8	SH3GL2	9_17540456_A_C_b37	rs13301671	4.1e-07	0.24	Lung
ENSG00000107295.8	SH3GL2	9_17540507_C_T_b37	rs13301942	4.1e-07	0.24	Lung
ENSG00000107295.8	SH3GL2	9_17532020_C_T_b37	rs10963126	4.1e-07	0.24	Lung
ENSG00000107295.8	SH3GL2	9_17532049_T_C_b37	rs10963127	4.1e-07	0.24	Lung
ENSG00000107295.8	SH3GL2	9_17618365_A_T_b37	rs3780244	4.1e-07	0.3	Pituitary
ENSG00000107295.8	SH3GL2	9_17624504_G_A_b37	rs10963166	4.1e-07	-0.39	Brain - Cerebellar Hemisphere
ENSG00000107295.8	SH3GL2	9_17579763_C_G_b37	rs12683178	4.2e-07	-0.26	Heart - Left Ventricle
ENSG00000107295.8	SH3GL2	9_17581661_G_A_b37	rs7030014	4.3e-07	-0.25	Heart - Left Ventricle
ENSG00000107295.8	SH3GL2	9_17581168_C_G_b37	rs10435770	4.5e-07	-0.25	Heart - Left Ventricle
ENSG00000107295.8	SH3GL2	9_17581242_C_CTA_b37	rs78167536	4.7e-07	-0.26	Heart - Left Ventricle
ENSG00000107295.8	SH3GL2	9_17583310_A_G_b37	rs1028594	4.8e-07	-0.26	Heart - Left Ventricle
ENSG00000107295.8	SH3GL2	9_17533610_G_T_b37	rs10810801	5e-07	0.24	Lung
ENSG00000107295.8	SH3GL2	9_17577445_CT_C_b37	rs11302971	5e-07	0.26	Heart - Left Ventricle
ENSG00000107295.8	SH3GL2	9_17531059_T_G_b37	rs11791273	5.2e-07	0.24	Lung
ENSG00000107295.8	SH3GL2	9_17584225_G_A_b37	rs10810811	5.3e-07	-0.26	Heart - Left Ventricle
ENSG00000107295.8	SH3GL2	9_17535550_G_A_b37	rs13283993	6e-07	0.24	Lung
ENSG00000107295.8	SH3GL2	9_17530730_T_C_b37	rs10810800	6.3e-07	0.24	Lung
ENSG00000107295.8	SH3GL2	9_17525337_T_A_b37	rs6475151	6.3e-07	0.25	Lung
ENSG00000107295.8	SH3GL2	9_17540608_C_T_b37	rs9717446	7.5e-07	0.23	Lung
ENSG00000107295.8	SH3GL2	9_17533996_T_C_b37	rs10810803	7.8e-07	0.24	Lung
ENSG00000107295.8	SH3GL2	9_17496975_T_G_b37	rs2441990	7.8e-07	0.69	Lung
ENSG00000107295.8	SH3GL2	9_17579761_C_T_b37	rs13292977	8.2e-07	0.26	Lung
ENSG00000107295.8	SH3GL2	9_17599511_A_G_b37	rs1010547	8.2e-07	-0.38	Thyroid
ENSG00000107295.8	SH3GL2	9_17688000_T_G_b37	rs3808716	8.3e-07	-0.49	Ovary
ENSG00000107295.8	SH3GL2	9_17691186_G_A_b37	rs3808712	8.5e-07	-0.49	Ovary
ENSG00000107295.8	SH3GL2	9_17533845_T_C_b37	rs10810802	9.4e-07	0.23	Lung
ENSG00000107295.8	SH3GL2	9_17556292_T_C_b37	rs2038511	1e-06	0.5	Lung
ENSG00000107295.8	SH3GL2	9_17529587_G_T_b37	rs2224454	1e-06	0.26	Lung
ENSG00000107295.8	SH3GL2	9_17532172_G_GT_b37	rs398113307	1.1e-06	0.24	Lung
ENSG00000107295.8	SH3GL2	9_17613587_A_G_b37	rs111387904	1.4e-06	0.62	Thyroid
ENSG00000107295.8	SH3GL2	9_16659371_G_A_b37	rs145793506	1.4e-06	0.81	Brain - Frontal Cortex (BA9)
ENSG00000107295.8	SH3GL2	9_17537756_A_G_b37	rs2754316	1.5e-06	0.48	Lung
ENSG00000107295.8	SH3GL2	9_17578502_C_T_b37	rs3758217	1.6e-06	0.23	Heart - Left Ventricle
ENSG00000107295.8	SH3GL2	9_17617409_T_C_b37	rs9407816	1.7e-06	0.29	Pituitary
ENSG00000107295.8	SH3GL2	9_17623318_C_T_b37	rs9407819	1.8e-06	0.29	Pituitary
ENSG00000107295.8	SH3GL2	9_17622897_G_A_b37	rs9407817	1.9e-06	0.28	Pituitary
ENSG00000107295.8	SH3GL2	9_17624700_C_G_b37	rs2224447	2.1e-06	0.29	Thyroid
ENSG00000107295.8	SH3GL2	9_17525742_T_C_b37	rs7350221	2.2e-06	0.24	Lung
ENSG00000107295.8	SH3GL2	9_17686933_A_G_b37	rs10963209	2.3e-06	-0.48	Ovary
ENSG00000107295.8	SH3GL2	9_17690052_T_G_b37	rs10118522	2.4e-06	0.19	Brain - Frontal Cortex (BA9)
ENSG00000107295.8	SH3GL2	9_17615527_C_T_b37	rs9406678	2.6e-06	0.28	Pituitary
ENSG00000107295.8	SH3GL2	9_17625568_A_G_b37	rs7045693	2.7e-06	0.29	Thyroid
ENSG00000107295.8	SH3GL2	9_17690173_C_T_b37	rs3780233	3e-06	-0.47	Ovary
ENSG00000107295.8	SH3GL2	9_17690180_A_G_b37	rs3780232	3e-06	-0.47	Ovary
ENSG00000107295.8	SH3GL2	9_17655744_G_A_b37	rs1536065	3e-06	-0.48	Ovary
ENSG00000107295.8	SH3GL2	9_17599369_A_T_b37	rs2208486	3e-06	-0.37	Thyroid
ENSG00000107295.8	SH3GL2	9_17734297_C_G_b37	rs10963231	3.1e-06	0.18	Brain - Frontal Cortex (BA9)
ENSG00000107295.8	SH3GL2	9_17734788_T_G_b37	rs10963234	3.1e-06	0.18	Brain - Frontal Cortex (BA9)
ENSG00000107295.8	SH3GL2	9_17734284_A_G_b37	rs10963230	3.1e-06	0.18	Brain - Frontal Cortex (BA9)
ENSG00000107295.8	SH3GL2	9_17734385_A_G_b37	rs12238402	3.1e-06	0.18	Brain - Frontal Cortex (BA9)
ENSG00000107295.8	SH3GL2	9_18439809_A_G_b37	rs111846957	3.1e-06	2.2	Brain - Nucleus accumbens (basal ganglia)
ENSG00000107295.8	SH3GL2	9_18439948_T_C_b37	rs77640819	3.1e-06	2.2	Brain - Nucleus accumbens (basal ganglia)
ENSG00000107295.8	SH3GL2	9_18440234_C_T_b37	rs75771277	3.1e-06	2.2	Brain - Nucleus accumbens (basal ganglia)
ENSG00000107295.8	SH3GL2	9_18445388_T_C_b37	rs79471635	3.1e-06	2.2	Brain - Nucleus accumbens (basal ganglia)
ENSG00000107295.8	SH3GL2	9_18460927_T_C_b37	rs75423900	3.1e-06	2.2	Brain - Nucleus accumbens (basal ganglia)
ENSG00000107295.8	SH3GL2	9_18492406_A_G_b37	rs137997664	3.1e-06	2.2	Brain - Nucleus accumbens (basal ganglia)
ENSG00000107295.8	SH3GL2	9_18508447_A_G_b37	rs4400483	3.1e-06	2.2	Brain - Nucleus accumbens (basal ganglia)
ENSG00000107295.8	SH3GL2	9_16977992_G_T_b37	rs4265285	3.2e-06	0.43	Artery - Coronary
ENSG00000107295.8	SH3GL2	9_17688527_A_G_b37	rs10738485	3.2e-06	-0.47	Ovary
ENSG00000107295.8	SH3GL2	9_17691204_T_C_b37	rs3808711	3.2e-06	-0.47	Ovary
ENSG00000107295.8	SH3GL2	9_17583846_A_G_b37	rs10120378	3.3e-06	-0.24	Heart - Left Ventricle
ENSG00000107295.8	SH3GL2	9_17733869_CA_C_b37	rs76726618	3.3e-06	0.18	Brain - Frontal Cortex (BA9)
ENSG00000107295.8	SH3GL2	9_17531968_T_C_b37	rs2593371	3.4e-06	-0.22	Lung
ENSG00000107295.8	SH3GL2	9_17656250_G_T_b37	rs3824383	3.8e-06	-0.47	Ovary
ENSG00000107295.8	SH3GL2	9_18324956_C_T_b37	rs7031275	4e-06	-0.68	Lung
ENSG00000107295.8	SH3GL2	9_18324031_T_C_b37	rs74614115	4.1e-06	-0.68	Lung
ENSG00000107295.8	SH3GL2	9_17563335_C_T_b37	rs2754338	4.1e-06	-0.21	Lung
ENSG00000107295.8	SH3GL2	9_17687230_A_G_b37	rs10963210	4.1e-06	-0.48	Ovary
ENSG00000107295.8	SH3GL2	9_17567908_A_G_b37	rs10963146	4.2e-06	0.21	Lung
ENSG00000107295.8	SH3GL2	9_17669942_G_A_b37	rs2147729	4.4e-06	-0.48	Ovary
ENSG00000107295.8	SH3GL2	9_17614778_A_G_b37	rs77074579	4.4e-06	0.25	Pituitary
ENSG00000107295.8	SH3GL2	9_17735707_G_A_b37	rs2383044	4.9e-06	0.18	Brain - Frontal Cortex (BA9)
ENSG00000107295.8	SH3GL2	9_17735483_C_T_b37	rs10756910	4.9e-06	0.18	Brain - Frontal Cortex (BA9)
ENSG00000107295.8	SH3GL2	9_17607554_G_A_b37	rs12380813	4.9e-06	0.24	Lung
ENSG00000107295.8	SH3GL2	9_17626452_C_T_b37	rs3824387	4.9e-06	-0.24	Pituitary
ENSG00000107295.8	SH3GL2	9_17607554_G_A_b37	rs12380813	4.9e-06	0.18	Stomach
ENSG00000107295.8	SH3GL2	9_17556641_C_A_b37	rs2038513	5e-06	0.46	Lung
ENSG00000107295.8	SH3GL2	9_17660559_A_C_b37	rs2025559	5.2e-06	0.17	Brain - Cortex
ENSG00000107295.8	SH3GL2	9_17663367_T_G_b37	rs67384654	5.3e-06	-0.47	Ovary
ENSG00000107295.8	SH3GL2	9_17663513_A_G_b37	rs3808721	5.3e-06	-0.47	Ovary
ENSG00000107295.8	SH3GL2	9_17674057_G_A_b37	rs10756896	5.3e-06	-0.47	Ovary
ENSG00000107295.8	SH3GL2	9_17674066_C_G_b37	rs10963196	5.3e-06	-0.47	Ovary
ENSG00000107295.8	SH3GL2	9_17676437_C_G_b37	rs10810823	5.3e-06	-0.47	Ovary
ENSG00000107295.8	SH3GL2	9_17676554_A_C_b37	rs10810824	5.3e-06	-0.47	Ovary
ENSG00000107295.8	SH3GL2	9_17536802_G_C_b37	rs2593379	5.4e-06	0.46	Lung
ENSG00000107295.8	SH3GL2	9_17656239_G_A_b37	rs3824384	5.5e-06	-0.46	Ovary
ENSG00000107295.8	SH3GL2	9_16730653_A_G_b37	rs1856132	5.6e-06	1	Adrenal Gland
ENSG00000107295.8	SH3GL2	9_17625002_A_G_b37	rs2208494	5.6e-06	0.28	Thyroid
ENSG00000107295.8	SH3GL2	9_18514222_A_C_b37	rs113443502	5.9e-06	1	Brain - Cortex
ENSG00000107295.8	SH3GL2	9_17136483_A_T_b37	rs79578390	6.1e-06	-2.4	Colon - Transverse
ENSG00000107295.8	SH3GL2	9_17665282_A_G_b37	rs10810818	6.1e-06	-0.47	Ovary
ENSG00000107295.8	SH3GL2	9_17665384_T_C_b37	rs10963191	6.1e-06	-0.47	Ovary
ENSG00000107295.8	SH3GL2	9_17616193_T_C_b37	rs3808755	6.2e-06	0.29	Thyroid
ENSG00000107295.8	SH3GL2	9_17657019_T_C_b37	rs10810817	6.3e-06	-0.46	Ovary
ENSG00000107295.8	SH3GL2	9_16736003_G_A_b37	rs10962556	6.5e-06	1	Adrenal Gland
ENSG00000107295.8	SH3GL2	9_17552203_A_G_b37	rs55885732	6.7e-06	0.24	Lung
ENSG00000107295.8	SH3GL2	9_17664191_C_T_b37	rs3808720	6.9e-06	-0.47	Ovary
ENSG00000107295.8	SH3GL2	9_17684784_G_C_b37	rs10756899	7e-06	0.21	Brain - Frontal Cortex (BA9)
ENSG00000107295.8	SH3GL2	9_17694913_G_A_b37	rs3808707	7.2e-06	-0.46	Ovary
ENSG00000107295.8	SH3GL2	9_16985589_A_C_b37	rs72718111	8e-06	-0.52	Artery - Coronary
ENSG00000107295.8	SH3GL2	9_17668650_A_ATTTAT_b37	rs397839335	8.2e-06	-0.47	Ovary
ENSG00000107295.8	SH3GL2	9_17670333_T_C_b37	rs2182083	8.2e-06	-0.47	Ovary
ENSG00000107295.8	SH3GL2	9_17623315_T_C_b37	rs9407818	8.4e-06	0.27	Pituitary
ENSG00000107295.8	SH3GL2	9_16727446_T_A_b37	rs2282072	8.5e-06	1	Adrenal Gland
ENSG00000107295.8	SH3GL2	9_17616399_G_A_b37	rs3808754	8.5e-06	0.29	Thyroid
ENSG00000107295.8	SH3GL2	9_16733410_T_C_b37	rs1337386	8.6e-06	0.99	Adrenal Gland
ENSG00000107295.8	SH3GL2	9_17599411_G_C_b37	rs2208487	8.8e-06	-0.35	Thyroid
ENSG00000107295.8	SH3GL2	9_17577651_G_A_b37	rs113645292	9e-06	0.68	Thyroid
ENSG00000107295.8	SH3GL2	9_17733213_T_G_b37	rs10810840	9.3e-06	0.18	Brain - Frontal Cortex (BA9)
ENSG00000107295.8	SH3GL2	9_17775367_C_T_b37	rs2209429	9.4e-06	0.36	Thyroid
ENSG00000107295.8	SH3GL2	9_17694823_C_T_b37	rs3808708	9.4e-06	-0.45	Ovary
ENSG00000107295.8	SH3GL2	9_16734676_T_C_b37	rs10810600	9.8e-06	0.98	Adrenal Gland
ENSG00000107295.8	SH3GL2	9_16743232_G_GT_b37	rs398096303	9.8e-06	0.98	Adrenal Gland
ENSG00000107295.8	SH3GL2	9_16754595_G_A_b37	rs12238070	9.8e-06	0.98	Adrenal Gland
ENSG00000107295.8	SH3GL2	9_17694386_G_C_b37	rs7858624	1e-05	0.17	Brain - Frontal Cortex (BA9)
ENSG00000107295.8	SH3GL2	9_17524038_G_T_b37	rs7350278	1.1e-05	0.23	Lung
ENSG00000107295.8	SH3GL2	9_16976200_C_T_b37	rs4961517	1.1e-05	-0.54	Artery - Coronary
ENSG00000107295.8	SH3GL2	9_17660559_A_C_b37	rs2025559	1.1e-05	-0.46	Ovary
ENSG00000107295.8	SH3GL2	9_17703386_A_G_b37	rs16935912	1.2e-05	-0.32	Brain - Cerebellum
ENSG00000107295.8	SH3GL2	9_17563146_G_T_b37	rs2593402	1.2e-05	-0.2	Lung
ENSG00000107295.8	SH3GL2	9_18326938_G_A_b37	rs76972419	1.2e-05	-0.67	Lung
ENSG00000107295.8	SH3GL2	9_18327346_C_T_b37	rs76624530	1.2e-05	-0.67	Lung
ENSG00000107295.8	SH3GL2	9_16984590_G_C_b37	rs72718109	1.2e-05	-0.49	Artery - Coronary
ENSG00000107295.8	SH3GL2	9_17521173_G_A_b37	rs2593391	1.3e-05	0.61	Lung
ENSG00000107295.8	SH3GL2	9_16736665_G_A_b37	rs73419969	1.3e-05	0.96	Adrenal Gland
ENSG00000107295.8	SH3GL2	9_17603496_G_A_b37	rs10810813	1.4e-05	0.28	Pituitary
ENSG00000107295.8	SH3GL2	9_17622213_G_A_b37	rs3808750	1.4e-05	-0.22	Pituitary
ENSG00000107295.8	SH3GL2	9_17784118_G_A_b37	rs2182082	1.6e-05	0.35	Thyroid
ENSG00000107295.8	SH3GL2	9_17662411_G_A_b37	rs10963190	1.6e-05	0.17	Brain - Frontal Cortex (BA9)
ENSG00000107295.8	SH3GL2	9_17570160_TC_T_b37	rs146575257	1.6e-05	0.2	Lung
ENSG00000107295.8	SH3GL2	9_17518131_T_C_b37	rs2754311	1.6e-05	0.63	Lung
ENSG00000107295.8	SH3GL2	9_16711287_T_C_b37	rs1361073	1.6e-05	0.81	Adrenal Gland
ENSG00000107295.8	SH3GL2	9_17660410_G_T_b37	rs10738482	1.7e-05	0.17	Brain - Cortex
ENSG00000107295.8	SH3GL2	9_16739423_G_A_b37	rs10810602	1.7e-05	0.98	Adrenal Gland
ENSG00000107295.8	SH3GL2	9_16746159_G_A_b37	rs10738457	1.7e-05	0.98	Adrenal Gland
ENSG00000107295.8	SH3GL2	9_16751872_C_T_b37	rs5016914	1.7e-05	0.98	Adrenal Gland
ENSG00000107295.8	SH3GL2	9_17620334_G_T_b37	rs7852041	1.7e-05	-0.22	Pituitary
ENSG00000107295.8	SH3GL2	9_17697864_C_G_b37	rs3808701	1.7e-05	-0.38	Brain - Cerebellum
ENSG00000107295.8	SH3GL2	9_16733870_G_T_b37	rs10810599	1.8e-05	0.98	Adrenal Gland
ENSG00000107295.8	SH3GL2	9_17703959_G_A_b37	rs6475166	1.8e-05	-0.29	Brain - Cerebellum
ENSG00000107295.8	SH3GL2	9_17664191_C_T_b37	rs3808720	1.8e-05	0.17	Brain - Cortex
ENSG00000107295.8	SH3GL2	9_17733190_G_A_b37	rs10810839	1.8e-05	0.17	Brain - Frontal Cortex (BA9)
ENSG00000107295.8	SH3GL2	9_17697932_G_A_b37	rs4961584	1.8e-05	-0.36	Brain - Cerebellum
ENSG00000107295.8	SH3GL2	9_17701785_G_A_b37	rs1536070	1.8e-05	-0.36	Brain - Cerebellum
ENSG00000107295.8	SH3GL2	9_17733885_T_C_b37	rs1536079	1.8e-05	0.18	Brain - Frontal Cortex (BA9)
ENSG00000107295.8	SH3GL2	9_17518804_G_A_b37	rs2499060	1.9e-05	0.61	Lung
ENSG00000107295.8	SH3GL2	9_17732911_G_C_b37	rs4961589	1.9e-05	0.19	Brain - Frontal Cortex (BA9)
ENSG00000107295.8	SH3GL2	9_17660410_G_T_b37	rs10738482	1.9e-05	0.16	Brain - Frontal Cortex (BA9)
ENSG00000107295.8	SH3GL2	9_17777004_G_A_b37	rs7032090	2e-05	0.34	Thyroid
ENSG00000107295.8	SH3GL2	9_17522028_AC_A_b37	rs58377938	2e-05	-0.17	Stomach
ENSG00000107295.8	SH3GL2	9_17692614_G_C_b37	rs10756900	2.1e-05	0.16	Brain - Cortex
ENSG00000107295.8	SH3GL2	9_17565388_C_A_b37	rs2013982	2.1e-05	-0.19	Lung
ENSG00000107295.8	SH3GL2	9_17574710_C_T_b37	rs11793646	2.3e-05	0.21	Lung
ENSG00000107295.8	SH3GL2	9_17822932_T_C_b37	rs12000021	2.5e-05	0.25	Heart - Left Ventricle
ENSG00000107295.8	SH3GL2	9_17571349_CA_C_b37	rs397894527	2.5e-05	0.2	Lung
ENSG00000107295.8	SH3GL2	9_17545057_C_G_b37	rs79366824	2.8e-05	0.29	Lung
ENSG00000107295.8	SH3GL2	9_17560622_C_T_b37	rs75379016	2.9e-05	0.64	Thyroid
ENSG00000107295.8	SH3GL2	9_17706499_C_T_b37	rs2383040	3.7e-05	-0.32	Thyroid
ENSG00000107295.8	SH3GL2	9_17704444_G_A_b37	rs10429594	3.9e-05	-0.3	Thyroid
ENSG00000107295.8	SH3GL2	9_17605449_T_C_b37	rs10115064	4.1e-05	-0.31	Thyroid
ENSG00000107295.8	SH3GL2	9_17786152_A_T_b37	rs2274215	4.2e-05	0.31	Thyroid
ENSG00000107295.8	SH3GL2	9_17786153_A_G_b37	rs2274216	4.2e-05	0.31	Thyroid
ENSG00000107295.8	SH3GL2	9_17768229_G_C_b37	rs9407846	4.9e-05	0.31	Thyroid
ENSG00000107295.8	SH3GL2	9_17790526_T_G_b37	rs9406730	5e-05	0.45	Thyroid
ENSG00000107295.8	SH3GL2	9_17766315_G_A_b37	rs2209426	5.7e-05	0.31	Thyroid
ENSG00000107295.8	SH3GL2	9_17769649_G_C_b37	rs2209427	5.7e-05	0.31	Thyroid
ENSG00000107295.8	SH3GL2	9_17770318_C_G_b37	rs4961595	5.7e-05	0.31	Thyroid
ENSG00000107295.8	SH3GL2	9_17705252_A_G_b37	rs2182088	5.7e-05	-0.29	Thyroid
ENSG00000205549.4	C9orf92	9_16249354_A_G_b37	rs4961472	2e-05	0.36	Testis
ENSG00000044459.10	CNTLN	9_17323254_C_T_b37	rs10963034	9.9e-43	0.49	Cells - Transformed fibroblasts
ENSG00000044459.10	CNTLN	9_17328674_A_G_b37	rs10810760	4.5e-42	0.49	Cells - Transformed fibroblasts
ENSG00000044459.10	CNTLN	9_17326897_G_C_b37	rs10963035	5e-42	0.49	Cells - Transformed fibroblasts
ENSG00000044459.10	CNTLN	9_17328476_C_T_b37	rs10756868	5e-42	0.49	Cells - Transformed fibroblasts
ENSG00000044459.10	CNTLN	9_17343708_G_A_b37	rs10963047	7.7e-42	0.48	Cells - Transformed fibroblasts
ENSG00000044459.10	CNTLN	9_17343013_A_G_b37	rs10963045	1e-41	0.48	Cells - Transformed fibroblasts
ENSG00000044459.10	CNTLN	9_17343116_A_G_b37	rs10810766	1e-41	0.48	Cells - Transformed fibroblasts
ENSG00000044459.10	CNTLN	9_17343261_G_A_b37	rs10810767	1e-41	0.48	Cells - Transformed fibroblasts
ENSG00000044459.10	CNTLN	9_17343787_C_T_b37	rs10963048	1e-41	0.48	Cells - Transformed fibroblasts
ENSG00000044459.10	CNTLN	9_17344707_C_A_b37	rs10963049	1e-41	0.48	Cells - Transformed fibroblasts
ENSG00000044459.10	CNTLN	9_17345018_T_C_b37	rs10963050	1e-41	0.48	Cells - Transformed fibroblasts
ENSG00000044459.10	CNTLN	9_17343041_C_A_b37	rs10963046	2.2e-41	0.48	Cells - Transformed fibroblasts
ENSG00000044459.10	CNTLN	9_17327807_T_C_b37	rs62561379	2.2e-41	0.48	Cells - Transformed fibroblasts
ENSG00000044459.10	CNTLN	9_17327587_T_C_b37	rs13293083	2.7e-41	0.49	Cells - Transformed fibroblasts
ENSG00000044459.10	CNTLN	9_17326249_T_A_b37	rs10810757	4.9e-41	0.48	Cells - Transformed fibroblasts
ENSG00000044459.10	CNTLN	9_17326488_T_A_b37	rs10810758	7.6e-41	0.48	Cells - Transformed fibroblasts
ENSG00000044459.10	CNTLN	9_17325851_G_T_b37	rs7848128	7.6e-41	0.49	Cells - Transformed fibroblasts
ENSG00000044459.10	CNTLN	9_17342571_GA_G_b37	rs68056113	1.3e-40	0.48	Cells - Transformed fibroblasts
ENSG00000044459.10	CNTLN	9_17327135_T_TA_b37	rs71492912	5.6e-40	0.49	Cells - Transformed fibroblasts
ENSG00000044459.10	CNTLN	9_17328928_C_T_b37	rs12553068	1.6e-38	0.48	Cells - Transformed fibroblasts
ENSG00000044459.10	CNTLN	9_17345387_A_ATAGT_b37	rs59007332	1.8e-38	0.47	Cells - Transformed fibroblasts
ENSG00000044459.10	CNTLN	9_17281271_A_AT_b37	rs397743400	5.9e-38	0.49	Cells - Transformed fibroblasts
ENSG00000044459.10	CNTLN	9_17329964_A_G_b37	rs1442528	8.9e-38	0.48	Cells - Transformed fibroblasts
ENSG00000044459.10	CNTLN	9_17328995_A_G_b37	rs12555618	9.6e-38	0.47	Cells - Transformed fibroblasts
ENSG00000044459.10	CNTLN	9_17299120_A_G_b37	rs7026852	2.1e-37	0.48	Cells - Transformed fibroblasts
ENSG00000044459.10	CNTLN	9_17292165_T_C_b37	rs11515075	2.2e-37	0.48	Cells - Transformed fibroblasts
ENSG00000044459.10	CNTLN	9_17292845_AG_A_b37	rs35876302	2.2e-37	0.48	Cells - Transformed fibroblasts
ENSG00000044459.10	CNTLN	9_17298547_C_G_b37	rs3739490	2.2e-37	0.48	Cells - Transformed fibroblasts
ENSG00000044459.10	CNTLN	9_17299872_T_A_b37	rs62558354	2.2e-37	0.48	Cells - Transformed fibroblasts
ENSG00000044459.10	CNTLN	9_17300057_A_C_b37	rs60520802	2.2e-37	0.48	Cells - Transformed fibroblasts
ENSG00000044459.10	CNTLN	9_17281216_G_A_b37	rs10962996	2.2e-37	0.48	Cells - Transformed fibroblasts
ENSG00000044459.10	CNTLN	9_17281497_C_T_b37	rs10962998	2.2e-37	0.48	Cells - Transformed fibroblasts
ENSG00000044459.10	CNTLN	9_17281538_G_T_b37	rs10962999	2.2e-37	0.48	Cells - Transformed fibroblasts
ENSG00000044459.10	CNTLN	9_17291778_T_C_b37	rs7867175	2.6e-37	0.48	Cells - Transformed fibroblasts
ENSG00000044459.10	CNTLN	9_17249911_T_A_b37	rs10962944	4.2e-37	0.46	Cells - Transformed fibroblasts
ENSG00000044459.10	CNTLN	9_17290094_A_T_b37	rs114658868	4.4e-37	0.48	Cells - Transformed fibroblasts
ENSG00000044459.10	CNTLN	9_17284641_TTTCTC_T_b37	rs369016594	5.1e-37	0.48	Cells - Transformed fibroblasts
ENSG00000044459.10	CNTLN	9_17311944_T_G_b37	rs10963025	5.3e-37	0.48	Cells - Transformed fibroblasts
ENSG00000044459.10	CNTLN	9_17279051_GAAC_G_b37	rs367907570	5.4e-37	0.48	Cells - Transformed fibroblasts
ENSG00000044459.10	CNTLN	9_17299342_T_C_b37	rs10963017	6.3e-37	0.48	Cells - Transformed fibroblasts
ENSG00000044459.10	CNTLN	9_17301713_A_G_b37	rs10963018	6.8e-37	0.48	Cells - Transformed fibroblasts
ENSG00000044459.10	CNTLN	9_17291263_A_G_b37	rs34256131	7.8e-37	0.48	Cells - Transformed fibroblasts
ENSG00000044459.10	CNTLN	9_17291973_C_T_b37	rs12377081	7.8e-37	0.48	Cells - Transformed fibroblasts
ENSG00000044459.10	CNTLN	9_17296529_C_T_b37	rs10963015	7.8e-37	0.48	Cells - Transformed fibroblasts
ENSG00000044459.10	CNTLN	9_17297694_C_T_b37	rs17828423	7.8e-37	0.48	Cells - Transformed fibroblasts
ENSG00000044459.10	CNTLN	9_17303067_T_C_b37	rs1953106	7.8e-37	0.48	Cells - Transformed fibroblasts
ENSG00000044459.10	CNTLN	9_17303255_C_T_b37	rs17755748	7.8e-37	0.48	Cells - Transformed fibroblasts
ENSG00000044459.10	CNTLN	9_17283132_G_A_b37	rs7042230	7.8e-37	0.48	Cells - Transformed fibroblasts
ENSG00000044459.10	CNTLN	9_17310822_T_C_b37	rs13287407	7.8e-37	0.48	Cells - Transformed fibroblasts
ENSG00000044459.10	CNTLN	9_17265477_C_G_b37	rs13288642	1.1e-36	0.48	Cells - Transformed fibroblasts
ENSG00000044459.10	CNTLN	9_17281278_A_T_b37	rs1889088	1.2e-36	0.45	Cells - Transformed fibroblasts
ENSG00000044459.10	CNTLN	9_17370957_G_A_b37	rs13286365	1.7e-36	0.48	Cells - Transformed fibroblasts
ENSG00000044459.10	CNTLN	9_17335050_A_C_b37	rs4317676	1.8e-36	0.48	Cells - Transformed fibroblasts
ENSG00000044459.10	CNTLN	9_17278607_C_T_b37	rs34502029	2e-36	0.45	Cells - Transformed fibroblasts
ENSG00000044459.10	CNTLN	9_17324158_G_C_b37	rs17829280	2.1e-36	0.47	Cells - Transformed fibroblasts
ENSG00000044459.10	CNTLN	9_17303726_A_T_b37	rs10963019	2.2e-36	0.48	Cells - Transformed fibroblasts
ENSG00000044459.10	CNTLN	9_17370800_A_T_b37	rs13285704	2.2e-36	0.48	Cells - Transformed fibroblasts
ENSG00000044459.10	CNTLN	9_17278726_A_G_b37	rs13292550	2.3e-36	0.48	Cells - Transformed fibroblasts
ENSG00000044459.10	CNTLN	9_17371019_A_G_b37	rs13289968	2.4e-36	0.47	Cells - Transformed fibroblasts
ENSG00000044459.10	CNTLN	9_17269126_G_A_b37	rs59833414	2.7e-36	0.48	Cells - Transformed fibroblasts
ENSG00000044459.10	CNTLN	9_17425664_C_G_b37	rs1348278	3e-36	0.44	Cells - Transformed fibroblasts
ENSG00000044459.10	CNTLN	9_17334135_G_A_b37	rs10963041	3.2e-36	0.48	Cells - Transformed fibroblasts
ENSG00000044459.10	CNTLN	9_17289795_G_T_b37	rs140810883	3.2e-36	0.48	Cells - Transformed fibroblasts
ENSG00000044459.10	CNTLN	9_17267413_G_T_b37	rs34768018	3.4e-36	0.48	Cells - Transformed fibroblasts
ENSG00000044459.10	CNTLN	9_17268590_C_T_b37	rs62558320	3.4e-36	0.48	Cells - Transformed fibroblasts
ENSG00000044459.10	CNTLN	9_17283550_T_G_b37	rs10810745	3.9e-36	0.45	Cells - Transformed fibroblasts
ENSG00000044459.10	CNTLN	9_17283597_C_G_b37	rs10810746	3.9e-36	0.45	Cells - Transformed fibroblasts
ENSG00000044459.10	CNTLN	9_17283690_T_C_b37	rs10963005	3.9e-36	0.45	Cells - Transformed fibroblasts
ENSG00000044459.10	CNTLN	9_17284013_TTTTG_T_b37	rs373542765	3.9e-36	0.45	Cells - Transformed fibroblasts
ENSG00000044459.10	CNTLN	9_17284073_A_G_b37	rs4626705	3.9e-36	0.45	Cells - Transformed fibroblasts
ENSG00000044459.10	CNTLN	9_17284602_C_T_b37	rs2383013	3.9e-36	0.45	Cells - Transformed fibroblasts
ENSG00000044459.10	CNTLN	9_17281923_G_A_b37	rs10963000	3.9e-36	0.45	Cells - Transformed fibroblasts
ENSG00000044459.10	CNTLN	9_17282186_G_C_b37	rs10963001	3.9e-36	0.45	Cells - Transformed fibroblasts
ENSG00000044459.10	CNTLN	9_17283020_A_G_b37	rs7041744	3.9e-36	0.45	Cells - Transformed fibroblasts
ENSG00000044459.10	CNTLN	9_17321039_T_G_b37	rs10963030	4e-36	0.47	Cells - Transformed fibroblasts
ENSG00000044459.10	CNTLN	9_17262847_C_T_b37	rs13292365	5.1e-36	0.48	Cells - Transformed fibroblasts
ENSG00000044459.10	CNTLN	9_17328201_G_C_b37	rs10810759	5.2e-36	0.48	Cells - Transformed fibroblasts
ENSG00000044459.10	CNTLN	9_17335706_T_C_b37	rs10810762	5.2e-36	0.48	Cells - Transformed fibroblasts
ENSG00000044459.10	CNTLN	9_17326340_G_A_b37	rs11789786	6.1e-36	0.48	Cells - Transformed fibroblasts
ENSG00000044459.10	CNTLN	9_17269629_T_C_b37	rs35998538	6.7e-36	0.48	Cells - Transformed fibroblasts
ENSG00000044459.10	CNTLN	9_17261765_A_G_b37	rs10962956	7.2e-36	0.48	Cells - Transformed fibroblasts
ENSG00000044459.10	CNTLN	9_17263748_T_G_b37	rs145190003	7.3e-36	0.48	Cells - Transformed fibroblasts
ENSG00000044459.10	CNTLN	9_17266340_G_T_b37	rs11523716	7.5e-36	0.47	Cells - Transformed fibroblasts
ENSG00000044459.10	CNTLN	9_17266095_C_G_b37	rs11523726	7.9e-36	0.47	Cells - Transformed fibroblasts
ENSG00000044459.10	CNTLN	9_17334075_T_G_b37	rs10963040	8e-36	0.47	Cells - Transformed fibroblasts
ENSG00000044459.10	CNTLN	9_17265946_G_T_b37	rs13289755	8e-36	0.47	Cells - Transformed fibroblasts
ENSG00000044459.10	CNTLN	9_17343840_C_G_b37	rs12379538	1e-35	0.48	Cells - Transformed fibroblasts
ENSG00000044459.10	CNTLN	9_17265852_T_A_b37	rs62252889	1.1e-35	0.47	Cells - Transformed fibroblasts
ENSG00000044459.10	CNTLN	9_17321313_C_G_b37	rs10963031	1.1e-35	0.47	Cells - Transformed fibroblasts
ENSG00000044459.10	CNTLN	9_17274331_T_A_b37	rs13290659	1.1e-35	0.45	Cells - Transformed fibroblasts
ENSG00000044459.10	CNTLN	9_17271479_GT_G_b37	rs397736711	1.2e-35	0.47	Cells - Transformed fibroblasts
ENSG00000044459.10	CNTLN	9_17282659_G_A_b37	rs35968717	1.2e-35	0.45	Cells - Transformed fibroblasts
ENSG00000044459.10	CNTLN	9_17312793_A_C_b37	rs61565870	1.4e-35	0.48	Cells - Transformed fibroblasts
ENSG00000044459.10	CNTLN	9_17346898_T_G_b37	rs13301284	1.5e-35	0.47	Cells - Transformed fibroblasts
ENSG00000044459.10	CNTLN	9_17352810_T_G_b37	rs12376973	1.5e-35	0.47	Cells - Transformed fibroblasts
ENSG00000044459.10	CNTLN	9_17365276_C_T_b37	rs62558966	1.5e-35	0.47	Cells - Transformed fibroblasts
ENSG00000044459.10	CNTLN	9_17348143_A_T_b37	rs12378677	1.6e-35	0.47	Cells - Transformed fibroblasts
ENSG00000044459.10	CNTLN	9_17353732_G_A_b37	rs13289670	1.6e-35	0.47	Cells - Transformed fibroblasts
ENSG00000044459.10	CNTLN	9_17353904_C_T_b37	rs10963060	1.6e-35	0.47	Cells - Transformed fibroblasts
ENSG00000044459.10	CNTLN	9_17355032_C_T_b37	rs10810772	1.6e-35	0.47	Cells - Transformed fibroblasts
ENSG00000044459.10	CNTLN	9_17360399_G_T_b37	rs35375281	1.6e-35	0.47	Cells - Transformed fibroblasts
ENSG00000044459.10	CNTLN	9_17368850_C_T_b37	rs2151342	1.6e-35	0.47	Cells - Transformed fibroblasts
ENSG00000044459.10	CNTLN	9_17299017_G_A_b37	rs35884270	1.8e-35	0.47	Cells - Transformed fibroblasts
ENSG00000044459.10	CNTLN	9_17326202_C_A_b37	rs11789741	2.1e-35	0.48	Cells - Transformed fibroblasts
ENSG00000044459.10	CNTLN	9_17270025_C_G_b37	rs13286311	2.2e-35	0.47	Cells - Transformed fibroblasts
ENSG00000044459.10	CNTLN	9_17257157_A_T_b37	rs62558300	2.2e-35	0.47	Cells - Transformed fibroblasts
ENSG00000044459.10	CNTLN	9_17359162_G_A_b37	rs10810776	2.5e-35	0.47	Cells - Transformed fibroblasts
ENSG00000044459.10	CNTLN	9_17262062_G_A_b37	rs10962958	3.6e-35	0.47	Cells - Transformed fibroblasts
ENSG00000044459.10	CNTLN	9_17262160_T_C_b37	rs10962959	3.6e-35	0.47	Cells - Transformed fibroblasts
ENSG00000044459.10	CNTLN	9_17321712_T_C_b37	rs10810755	3.8e-35	0.47	Cells - Transformed fibroblasts
ENSG00000044459.10	CNTLN	9_17257324_A_G_b37	rs62558301	5.1e-35	0.47	Cells - Transformed fibroblasts
ENSG00000044459.10	CNTLN	9_17358903_G_A_b37	rs11791000	5.3e-35	0.47	Cells - Transformed fibroblasts
ENSG00000044459.10	CNTLN	9_17273628_C_CAG_b37	rs3840729	5.8e-35	0.45	Cells - Transformed fibroblasts
ENSG00000044459.10	CNTLN	9_17370778_A_G_b37	rs13285577	6.6e-35	0.47	Cells - Transformed fibroblasts
ENSG00000044459.10	CNTLN	9_17273926_C_G_b37	rs12379655	7.3e-35	0.44	Cells - Transformed fibroblasts
ENSG00000044459.10	CNTLN	9_17273878_A_G_b37	rs12376938	7.7e-35	0.48	Cells - Transformed fibroblasts
ENSG00000044459.10	CNTLN	9_17380962_C_G_b37	rs7028577	9.1e-35	0.47	Cells - Transformed fibroblasts
ENSG00000044459.10	CNTLN	9_17262898_C_G_b37	rs13292380	1.2e-34	0.47	Cells - Transformed fibroblasts
ENSG00000044459.10	CNTLN	9_17284111_A_C_b37	rs4574939	1.3e-34	0.45	Cells - Transformed fibroblasts
ENSG00000044459.10	CNTLN	9_17255537_C_G_b37	rs11789418	1.4e-34	0.47	Cells - Transformed fibroblasts
ENSG00000044459.10	CNTLN	9_17284805_T_C_b37	rs2095156	1.7e-34	0.47	Cells - Transformed fibroblasts
ENSG00000044459.10	CNTLN	9_17325281_CAT_C_b37	rs796494963	1.8e-34	0.47	Cells - Transformed fibroblasts
ENSG00000044459.10	CNTLN	9_17273731_A_G_b37	rs3808795	1.9e-34	0.45	Cells - Transformed fibroblasts
ENSG00000044459.10	CNTLN	9_17364272_T_C_b37	rs35601090	2.1e-34	0.47	Cells - Transformed fibroblasts
ENSG00000044459.10	CNTLN	9_17277778_T_A_b37	rs4375098	2.3e-34	0.45	Cells - Transformed fibroblasts
ENSG00000044459.10	CNTLN	9_17310385_G_C_b37	rs10963022	3e-34	0.47	Cells - Transformed fibroblasts
ENSG00000044459.10	CNTLN	9_17358463_A_G_b37	rs10963065	4.1e-34	0.47	Cells - Transformed fibroblasts
ENSG00000044459.10	CNTLN	9_17394225_C_T_b37	rs10963078	4.9e-34	0.47	Cells - Transformed fibroblasts
ENSG00000044459.10	CNTLN	9_17272312_A_G_b37	rs12376505	6.3e-34	0.46	Cells - Transformed fibroblasts
ENSG00000044459.10	CNTLN	9_17386020_A_G_b37	rs10963077	6.6e-34	0.47	Cells - Transformed fibroblasts
ENSG00000044459.10	CNTLN	9_17362540_G_C_b37	rs12377334	7.7e-34	0.47	Cells - Transformed fibroblasts
ENSG00000044459.10	CNTLN	9_17255507_T_C_b37	rs11791463	1e-33	0.46	Cells - Transformed fibroblasts
ENSG00000044459.10	CNTLN	9_17454820_G_A_b37	rs1372703	1.3e-33	-0.46	Cells - Transformed fibroblasts
ENSG00000044459.10	CNTLN	9_17379615_C_A_b37	rs10963073	2.7e-33	0.47	Cells - Transformed fibroblasts
ENSG00000044459.10	CNTLN	9_17383993_G_T_b37	rs12156444	2.8e-33	0.46	Cells - Transformed fibroblasts
ENSG00000044459.10	CNTLN	9_17384521_C_A_b37	rs1442517	4.3e-33	0.47	Cells - Transformed fibroblasts
ENSG00000044459.10	CNTLN	9_17276104_T_C_b37	rs2027014	5.9e-33	0.44	Cells - Transformed fibroblasts
ENSG00000044459.10	CNTLN	9_17255226_T_A_b37	rs10962949	6.6e-33	0.46	Cells - Transformed fibroblasts
ENSG00000044459.10	CNTLN	9_17372689_C_G_b37	rs10963069	7.3e-33	0.45	Cells - Transformed fibroblasts
ENSG00000044459.10	CNTLN	9_17453200_G_A_b37	rs2584540	9e-33	-0.46	Cells - Transformed fibroblasts
ENSG00000044459.10	CNTLN	9_17370081_G_C_b37	rs12553516	1.7e-32	0.45	Cells - Transformed fibroblasts
ENSG00000044459.10	CNTLN	9_17406235_A_G_b37	rs36051199	6.2e-32	0.46	Cells - Transformed fibroblasts
ENSG00000044459.10	CNTLN	9_17274815_C_G_b37	rs10962993	6.2e-32	0.44	Cells - Transformed fibroblasts
ENSG00000044459.10	CNTLN	9_17281961_C_CT_b37	rs397893175	7.3e-32	0.45	Cells - Transformed fibroblasts
ENSG00000044459.10	CNTLN	9_17357365_A_T_b37	rs10963064	9.4e-32	0.47	Cells - Transformed fibroblasts
ENSG00000044459.10	CNTLN	9_17451083_G_A_b37	rs2584538	1.3e-31	-0.44	Cells - Transformed fibroblasts
ENSG00000044459.10	CNTLN	9_17425725_T_C_b37	rs1348277	1.3e-31	0.43	Cells - Transformed fibroblasts
ENSG00000044459.10	CNTLN	9_17454593_G_A_b37	rs894379	1.5e-31	-0.46	Cells - Transformed fibroblasts
ENSG00000044459.10	CNTLN	9_17275314_T_C_b37	rs10810743	1.8e-31	0.45	Cells - Transformed fibroblasts
ENSG00000044459.10	CNTLN	9_17275039_C_G_b37	rs10962994	2.6e-31	0.44	Cells - Transformed fibroblasts
ENSG00000044459.10	CNTLN	9_17378776_G_A_b37	rs10963072	2.9e-31	0.48	Cells - Transformed fibroblasts
ENSG00000044459.10	CNTLN	9_17382575_A_G_b37	rs13283291	8.5e-31	0.44	Cells - Transformed fibroblasts
ENSG00000044459.10	CNTLN	9_17265490_C_G_b37	rs13288652	1.6e-30	0.43	Cells - Transformed fibroblasts
ENSG00000044459.10	CNTLN	9_17400701_G_T_b37	rs4961559	1.1e-29	0.43	Cells - Transformed fibroblasts
ENSG00000044459.10	CNTLN	9_17381799_G_A_b37	rs10810780	1.2e-29	0.42	Cells - Transformed fibroblasts
ENSG00000044459.10	CNTLN	9_17321574_C_T_b37	rs9298774	1.8e-29	-0.38	Cells - Transformed fibroblasts
ENSG00000044459.10	CNTLN	9_17278584_A_G_b37	rs2779773	2e-29	0.37	Cells - Transformed fibroblasts
ENSG00000044459.10	CNTLN	9_17283197_G_A_b37	rs595894	2e-29	0.37	Cells - Transformed fibroblasts
ENSG00000044459.10	CNTLN	9_17324268_C_T_b37	rs10810756	2.3e-29	-0.38	Cells - Transformed fibroblasts
ENSG00000044459.10	CNTLN	9_17276823_G_A_b37	rs11795325	2.3e-29	0.42	Cells - Transformed fibroblasts
ENSG00000044459.10	CNTLN	9_17282681_C_G_b37	rs593614	3.3e-29	0.37	Cells - Transformed fibroblasts
ENSG00000044459.10	CNTLN	9_17320881_A_G_b37	rs7028593	3.4e-29	-0.38	Cells - Transformed fibroblasts
ENSG00000044459.10	CNTLN	9_17405331_A_G_b37	rs58474114	4.2e-29	0.43	Cells - Transformed fibroblasts
ENSG00000044459.10	CNTLN	9_17331647_G_A_b37	rs10963039	4.2e-29	0.46	Cells - Transformed fibroblasts
ENSG00000044459.10	CNTLN	9_17341670_A_G_b37	rs10810765	4.7e-29	0.39	Cells - Transformed fibroblasts
ENSG00000044459.10	CNTLN	9_17336338_C_G_b37	rs4961539	5e-29	-0.38	Cells - Transformed fibroblasts
ENSG00000044459.10	CNTLN	9_17280827_C_G_b37	rs870271	5.7e-29	0.37	Cells - Transformed fibroblasts
ENSG00000044459.10	CNTLN	9_17336882_C_T_b37	rs7044462	5.8e-29	-0.38	Cells - Transformed fibroblasts
ENSG00000044459.10	CNTLN	9_17294425_T_TC_b37	rs398113305	5.9e-29	0.38	Cells - Transformed fibroblasts
ENSG00000044459.10	CNTLN	9_17302341_A_G_b37	rs619380	5.9e-29	0.38	Cells - Transformed fibroblasts
ENSG00000044459.10	CNTLN	9_17292890_A_G_b37	rs670058	6.1e-29	0.37	Cells - Transformed fibroblasts
ENSG00000044459.10	CNTLN	9_17293779_G_A_b37	rs645117	6.1e-29	0.37	Cells - Transformed fibroblasts
ENSG00000044459.10	CNTLN	9_17295260_A_C_b37	rs4409489	6.1e-29	0.37	Cells - Transformed fibroblasts
ENSG00000044459.10	CNTLN	9_17290970_T_C_b37	rs605469	6.5e-29	0.38	Cells - Transformed fibroblasts
ENSG00000044459.10	CNTLN	9_17409709_C_CA_b37	rs397756102	8e-29	0.44	Cells - Transformed fibroblasts
ENSG00000044459.10	CNTLN	9_17276775_G_A_b37	rs2184063	8.1e-29	0.42	Cells - Transformed fibroblasts
ENSG00000044459.10	CNTLN	9_17313678_T_A_b37	rs7864650	9.1e-29	-0.38	Cells - Transformed fibroblasts
ENSG00000044459.10	CNTLN	9_17260010_C_T_b37	rs10962955	1e-28	0.38	Cells - Transformed fibroblasts
ENSG00000044459.10	CNTLN	9_17318647_C_T_b37	rs12337171	1.1e-28	-0.37	Cells - Transformed fibroblasts
ENSG00000044459.10	CNTLN	9_17319339_T_C_b37	rs4272484	1.2e-28	-0.38	Cells - Transformed fibroblasts
ENSG00000044459.10	CNTLN	9_17274319_G_T_b37	rs2779775	1.2e-28	0.37	Cells - Transformed fibroblasts
ENSG00000044459.10	CNTLN	9_17312886_A_T_b37	rs10810749	1.4e-28	-0.38	Cells - Transformed fibroblasts
ENSG00000044459.10	CNTLN	9_17279064_C_T_b37	rs1759613	1.5e-28	0.37	Cells - Transformed fibroblasts
ENSG00000044459.10	CNTLN	9_17373948_T_C_b37	rs10114083	1.6e-28	-0.38	Cells - Transformed fibroblasts
ENSG00000044459.10	CNTLN	9_17333747_CAT_C_b37	rs3840727	1.6e-28	-0.38	Cells - Transformed fibroblasts
ENSG00000044459.10	CNTLN	9_17313926_C_T_b37	rs10963026	1.8e-28	-0.38	Cells - Transformed fibroblasts
ENSG00000044459.10	CNTLN	9_17253289_T_A_b37	rs34597155	2.3e-28	0.44	Cells - Transformed fibroblasts
ENSG00000044459.10	CNTLN	9_17344148_GTTTAT_G_b37	rs10531584	2.3e-28	-0.38	Cells - Transformed fibroblasts
ENSG00000044459.10	CNTLN	9_17364832_G_T_b37	rs10756876	2.3e-28	-0.38	Cells - Transformed fibroblasts
ENSG00000044459.10	CNTLN	9_17279838_T_C_b37	rs1759441	3.3e-28	0.37	Cells - Transformed fibroblasts
ENSG00000044459.10	CNTLN	9_17365351_T_C_b37	rs10123745	3.9e-28	-0.38	Cells - Transformed fibroblasts
ENSG00000044459.10	CNTLN	9_17361597_A_G_b37	rs7022060	4.2e-28	-0.37	Cells - Transformed fibroblasts
ENSG00000044459.10	CNTLN	9_17314532_T_G_b37	rs10810752	4.3e-28	-0.37	Cells - Transformed fibroblasts
ENSG00000044459.10	CNTLN	9_17318434_G_C_b37	rs12337154	4.3e-28	-0.37	Cells - Transformed fibroblasts
ENSG00000044459.10	CNTLN	9_17319956_C_A_b37	rs9298772	4.3e-28	-0.37	Cells - Transformed fibroblasts
ENSG00000044459.10	CNTLN	9_17320792_T_C_b37	rs7044823	4.3e-28	-0.37	Cells - Transformed fibroblasts
ENSG00000044459.10	CNTLN	9_17320822_G_C_b37	rs7028930	4.3e-28	-0.37	Cells - Transformed fibroblasts
ENSG00000044459.10	CNTLN	9_17321670_C_T_b37	rs10125333	4.3e-28	-0.37	Cells - Transformed fibroblasts
ENSG00000044459.10	CNTLN	9_17339718_G_A_b37	rs10810764	4.5e-28	-0.37	Cells - Transformed fibroblasts
ENSG00000044459.10	CNTLN	9_17366296_A_ATTG_b37	rs10686546	4.5e-28	-0.38	Cells - Transformed fibroblasts
ENSG00000044459.10	CNTLN	9_17347872_C_T_b37	rs7865766	5.3e-28	-0.37	Cells - Transformed fibroblasts
ENSG00000044459.10	CNTLN	9_17271858_A_G_b37	rs654521	6.6e-28	0.37	Cells - Transformed fibroblasts
ENSG00000044459.10	CNTLN	9_17334526_G_A_b37	rs9298775	7.2e-28	-0.37	Cells - Transformed fibroblasts
ENSG00000044459.10	CNTLN	9_17335585_A_G_b37	rs4246136	7.2e-28	-0.37	Cells - Transformed fibroblasts
ENSG00000044459.10	CNTLN	9_17336360_G_A_b37	rs10810763	7.2e-28	-0.37	Cells - Transformed fibroblasts
ENSG00000044459.10	CNTLN	9_17380998_T_A_b37	rs10756878	7.2e-28	-0.36	Cells - Transformed fibroblasts
ENSG00000044459.10	CNTLN	9_17374797_T_G_b37	rs6475147	7.3e-28	-0.38	Cells - Transformed fibroblasts
ENSG00000044459.10	CNTLN	9_17313619_A_G_b37	rs7849085	7.6e-28	-0.37	Cells - Transformed fibroblasts
ENSG00000044459.10	CNTLN	9_17320544_A_G_b37	rs10810754	7.7e-28	-0.38	Cells - Transformed fibroblasts
ENSG00000044459.10	CNTLN	9_17367325_C_A_b37	rs3861711	8.1e-28	-0.38	Cells - Transformed fibroblasts
ENSG00000044459.10	CNTLN	9_17335125_T_C_b37	rs10123715	8.4e-28	-0.37	Cells - Transformed fibroblasts
ENSG00000044459.10	CNTLN	9_17291057_A_G_b37	rs605916	8.5e-28	0.37	Cells - Transformed fibroblasts
ENSG00000044459.10	CNTLN	9_17293025_G_T_b37	rs670511	8.5e-28	0.37	Cells - Transformed fibroblasts
ENSG00000044459.10	CNTLN	9_17300060_G_A_b37	rs2779778	8.5e-28	0.37	Cells - Transformed fibroblasts
ENSG00000044459.10	CNTLN	9_17300064_C_T_b37	rs2780206	8.5e-28	0.37	Cells - Transformed fibroblasts
ENSG00000044459.10	CNTLN	9_17364514_T_C_b37	rs10122987	8.5e-28	-0.38	Cells - Transformed fibroblasts
ENSG00000044459.10	CNTLN	9_17290979_T_C_b37	rs605482	8.7e-28	0.37	Cells - Transformed fibroblasts
ENSG00000044459.10	CNTLN	9_17359939_C_T_b37	rs7037111	9.6e-28	-0.37	Cells - Transformed fibroblasts
ENSG00000044459.10	CNTLN	9_17267371_C_G_b37	rs7018705	9.7e-28	0.37	Cells - Transformed fibroblasts
ENSG00000044459.10	CNTLN	9_17268584_T_C_b37	rs10962982	9.7e-28	0.37	Cells - Transformed fibroblasts
ENSG00000044459.10	CNTLN	9_17334801_G_A_b37	rs10046851	1e-27	-0.37	Cells - Transformed fibroblasts
ENSG00000044459.10	CNTLN	9_17367399_T_TAAAA_b37	rs398073456	1e-27	-0.38	Cells - Transformed fibroblasts
ENSG00000044459.10	CNTLN	9_17368900_A_G_b37	rs4961552	1e-27	-0.38	Cells - Transformed fibroblasts
ENSG00000044459.10	CNTLN	9_17369684_A_G_b37	rs4961553	1e-27	-0.38	Cells - Transformed fibroblasts
ENSG00000044459.10	CNTLN	9_17302919_T_A_b37	rs1759454	1.1e-27	0.37	Cells - Transformed fibroblasts
ENSG00000044459.10	CNTLN	9_17335480_A_C_b37	rs10481559	1.1e-27	-0.37	Cells - Transformed fibroblasts
ENSG00000044459.10	CNTLN	9_17295223_T_C_b37	rs4424358	1.2e-27	0.37	Cells - Transformed fibroblasts
ENSG00000044459.10	CNTLN	9_17336492_G_A_b37	rs10738474	1.2e-27	-0.38	Cells - Transformed fibroblasts
ENSG00000044459.10	CNTLN	9_17349864_C_T_b37	rs2044119	1.4e-27	-0.37	Cells - Transformed fibroblasts
ENSG00000044459.10	CNTLN	9_17351711_A_G_b37	rs6475143	1.5e-27	-0.37	Cells - Transformed fibroblasts
ENSG00000044459.10	CNTLN	9_17355341_T_C_b37	rs10963063	1.6e-27	-0.37	Cells - Transformed fibroblasts
ENSG00000044459.10	CNTLN	9_17339793_G_A_b37	rs7854802	1.6e-27	-0.37	Cells - Transformed fibroblasts
ENSG00000044459.10	CNTLN	9_17339839_T_C_b37	rs7870101	1.6e-27	-0.37	Cells - Transformed fibroblasts
ENSG00000044459.10	CNTLN	9_17372261_G_T_b37	rs12379104	1.7e-27	-0.38	Cells - Transformed fibroblasts
ENSG00000044459.10	CNTLN	9_17353077_G_T_b37	rs10114730	1.7e-27	-0.37	Cells - Transformed fibroblasts
ENSG00000044459.10	CNTLN	9_17346404_A_G_b37	rs10119370	1.7e-27	-0.37	Cells - Transformed fibroblasts
ENSG00000044459.10	CNTLN	9_17350378_A_C_b37	rs6475141	1.7e-27	-0.37	Cells - Transformed fibroblasts
ENSG00000044459.10	CNTLN	9_17350631_G_A_b37	rs6475142	1.7e-27	-0.37	Cells - Transformed fibroblasts
ENSG00000044459.10	CNTLN	9_17353087_A_G_b37	rs10120757	1.7e-27	-0.37	Cells - Transformed fibroblasts
ENSG00000044459.10	CNTLN	9_17353096_C_T_b37	rs10114688	1.7e-27	-0.37	Cells - Transformed fibroblasts
ENSG00000044459.10	CNTLN	9_17353918_A_G_b37	rs7868684	1.7e-27	-0.37	Cells - Transformed fibroblasts
ENSG00000044459.10	CNTLN	9_17353987_A_G_b37	rs7868700	1.7e-27	-0.37	Cells - Transformed fibroblasts
ENSG00000044459.10	CNTLN	9_17354045_C_A_b37	rs7871926	1.7e-27	-0.37	Cells - Transformed fibroblasts
ENSG00000044459.10	CNTLN	9_17354520_T_C_b37	rs7858760	1.7e-27	-0.37	Cells - Transformed fibroblasts
ENSG00000044459.10	CNTLN	9_17354527_T_C_b37	rs7858762	1.7e-27	-0.37	Cells - Transformed fibroblasts
ENSG00000044459.10	CNTLN	9_17354758_C_T_b37	rs7872831	1.7e-27	-0.37	Cells - Transformed fibroblasts
ENSG00000044459.10	CNTLN	9_17355782_G_A_b37	rs4961541	1.7e-27	-0.37	Cells - Transformed fibroblasts
ENSG00000044459.10	CNTLN	9_17356411_A_C_b37	rs10810773	1.7e-27	-0.37	Cells - Transformed fibroblasts
ENSG00000044459.10	CNTLN	9_17356475_A_G_b37	rs10756874	1.7e-27	-0.37	Cells - Transformed fibroblasts
ENSG00000044459.10	CNTLN	9_17360179_C_G_b37	rs10810777	1.7e-27	-0.37	Cells - Transformed fibroblasts
ENSG00000044459.10	CNTLN	9_17363218_A_C_b37	rs6475145	1.7e-27	-0.37	Cells - Transformed fibroblasts
ENSG00000044459.10	CNTLN	9_17348688_G_C_b37	rs10810769	1.7e-27	-0.37	Cells - Transformed fibroblasts
ENSG00000044459.10	CNTLN	9_17348689_G_C_b37	rs10810770	1.7e-27	-0.37	Cells - Transformed fibroblasts
ENSG00000044459.10	CNTLN	9_17300093_G_A_b37	rs2779776	1.9e-27	0.37	Cells - Transformed fibroblasts
ENSG00000044459.10	CNTLN	9_17353689_T_C_b37	rs7854818	1.9e-27	-0.37	Cells - Transformed fibroblasts
ENSG00000044459.10	CNTLN	9_17346156_T_C_b37	rs10116428	1.9e-27	-0.37	Cells - Transformed fibroblasts
ENSG00000044459.10	CNTLN	9_17349834_T_A_b37	rs2044120	2e-27	-0.37	Cells - Transformed fibroblasts
ENSG00000044459.10	CNTLN	9_17345817_T_C_b37	rs4961540	2.1e-27	-0.37	Cells - Transformed fibroblasts
ENSG00000044459.10	CNTLN	9_17371690_C_T_b37	rs1596193	2.3e-27	-0.37	Cells - Transformed fibroblasts
ENSG00000044459.10	CNTLN	9_17314292_A_T_b37	rs10810751	2.4e-27	-0.37	Cells - Transformed fibroblasts
ENSG00000044459.10	CNTLN	9_17333453_G_A_b37	rs7031133	2.5e-27	-0.37	Cells - Transformed fibroblasts
ENSG00000044459.10	CNTLN	9_17347722_T_C_b37	rs7851890	2.5e-27	-0.38	Cells - Transformed fibroblasts
ENSG00000044459.10	CNTLN	9_17352005_G_A_b37	rs6475144	2.6e-27	-0.37	Cells - Transformed fibroblasts
ENSG00000044459.10	CNTLN	9_17313415_C_CT_b37	rs139376119	2.6e-27	0.47	Cells - Transformed fibroblasts
ENSG00000044459.10	CNTLN	9_17313614_A_C_b37	rs7849084	2.7e-27	-0.37	Cells - Transformed fibroblasts
ENSG00000044459.10	CNTLN	9_17333543_A_G_b37	rs3808784	2.7e-27	-0.37	Cells - Transformed fibroblasts
ENSG00000044459.10	CNTLN	9_17313996_T_G_b37	rs10963027	2.8e-27	-0.37	Cells - Transformed fibroblasts
ENSG00000044459.10	CNTLN	9_17348552_G_T_b37	rs7869727	2.9e-27	-0.38	Cells - Transformed fibroblasts
ENSG00000044459.10	CNTLN	9_17346147_A_G_b37	rs10119297	3e-27	-0.37	Cells - Transformed fibroblasts
ENSG00000044459.10	CNTLN	9_17350843_C_T_b37	rs10124487	3.1e-27	-0.37	Cells - Transformed fibroblasts
ENSG00000044459.10	CNTLN	9_17312829_G_A_b37	rs10810748	3.2e-27	-0.37	Cells - Transformed fibroblasts
ENSG00000044459.10	CNTLN	9_17346914_C_T_b37	rs6475139	3.3e-27	-0.38	Cells - Transformed fibroblasts
ENSG00000044459.10	CNTLN	9_17347258_A_G_b37	rs7864919	3.3e-27	-0.38	Cells - Transformed fibroblasts
ENSG00000044459.10	CNTLN	9_17368458_C_T_b37	rs4961437	3.3e-27	-0.38	Cells - Transformed fibroblasts
ENSG00000044459.10	CNTLN	9_17259049_C_G_b37	rs113101695	3.6e-27	0.44	Cells - Transformed fibroblasts
ENSG00000044459.10	CNTLN	9_17321382_T_C_b37	rs9298773	3.6e-27	-0.37	Cells - Transformed fibroblasts
ENSG00000044459.10	CNTLN	9_17301710_C_A_b37	rs632265	3.7e-27	0.37	Cells - Transformed fibroblasts
ENSG00000044459.10	CNTLN	9_17418425_T_G_b37	rs1442516	3.7e-27	0.4	Cells - Transformed fibroblasts
ENSG00000044459.10	CNTLN	9_17365613_T_C_b37	rs2225598	4e-27	-0.37	Cells - Transformed fibroblasts
ENSG00000044459.10	CNTLN	9_17342517_A_G_b37	rs10756869	4.3e-27	-0.37	Cells - Transformed fibroblasts
ENSG00000044459.10	CNTLN	9_17363286_A_G_b37	rs7030452	4.6e-27	-0.37	Cells - Transformed fibroblasts
ENSG00000044459.10	CNTLN	9_17325704_C_G_b37	rs10756867	4.7e-27	-0.37	Cells - Transformed fibroblasts
ENSG00000044459.10	CNTLN	9_17355890_GTC_G_b37	rs35917270	5.2e-27	-0.37	Cells - Transformed fibroblasts
ENSG00000044459.10	CNTLN	9_17350983_C_G_b37	rs10124513	5.3e-27	-0.37	Cells - Transformed fibroblasts
ENSG00000044459.10	CNTLN	9_17366568_A_T_b37	rs4961548	5.4e-27	-0.38	Cells - Transformed fibroblasts
ENSG00000044459.10	CNTLN	9_17295837_C_G_b37	rs2990670	5.9e-27	0.37	Cells - Transformed fibroblasts
ENSG00000044459.10	CNTLN	9_17349497_A_G_b37	rs10963057	6.1e-27	-0.37	Cells - Transformed fibroblasts
ENSG00000044459.10	CNTLN	9_17340377_A_G_b37	rs3824392	6.6e-27	-0.37	Cells - Transformed fibroblasts
ENSG00000044459.10	CNTLN	9_17340383_G_A_b37	rs3824391	6.6e-27	-0.37	Cells - Transformed fibroblasts
ENSG00000044459.10	CNTLN	9_17354396_T_C_b37	rs7858530	7e-27	-0.37	Cells - Transformed fibroblasts
ENSG00000044459.10	CNTLN	9_17247384_A_G_b37	rs2151290	7.1e-27	0.36	Cells - Transformed fibroblasts
ENSG00000044459.10	CNTLN	9_17349531_A_T_b37	rs7873708	7.8e-27	-0.37	Cells - Transformed fibroblasts
ENSG00000044459.10	CNTLN	9_17357265_G_GT_b37	rs397750534	8.1e-27	-0.37	Cells - Transformed fibroblasts
ENSG00000044459.10	CNTLN	9_17390339_C_T_b37	rs10116140	9.1e-27	-0.37	Cells - Transformed fibroblasts
ENSG00000044459.10	CNTLN	9_17309336_T_C_b37	rs10756860	1.1e-26	-0.37	Cells - Transformed fibroblasts
ENSG00000044459.10	CNTLN	9_17364157_A_C_b37	rs7862069	1.1e-26	-0.37	Cells - Transformed fibroblasts
ENSG00000044459.10	CNTLN	9_17364507_T_C_b37	rs7848980	1.1e-26	-0.37	Cells - Transformed fibroblasts
ENSG00000044459.10	CNTLN	9_17154345_A_T_b37	rs10448195	1.2e-26	0.44	Cells - Transformed fibroblasts
ENSG00000044459.10	CNTLN	9_17372209_G_C_b37	rs12379102	1.3e-26	-0.37	Cells - Transformed fibroblasts
ENSG00000044459.10	CNTLN	9_17356925_T_C_b37	rs10810774	1.3e-26	-0.37	Cells - Transformed fibroblasts
ENSG00000044459.10	CNTLN	9_17356550_G_A_b37	rs10756875	1.3e-26	-0.37	Cells - Transformed fibroblasts
ENSG00000044459.10	CNTLN	9_17362180_C_A_b37	rs1372702	1.3e-26	-0.37	Cells - Transformed fibroblasts
ENSG00000044459.10	CNTLN	9_17365022_C_A_b37	rs10756877	1.3e-26	-0.37	Cells - Transformed fibroblasts
ENSG00000044459.10	CNTLN	9_17366932_C_G_b37	rs2099858	1.3e-26	-0.37	Cells - Transformed fibroblasts
ENSG00000044459.10	CNTLN	9_17367368_T_C_b37	rs1583987	1.3e-26	-0.37	Cells - Transformed fibroblasts
ENSG00000044459.10	CNTLN	9_17367616_T_G_b37	rs1583988	1.3e-26	-0.37	Cells - Transformed fibroblasts
ENSG00000044459.10	CNTLN	9_17367617_C_T_b37	rs1583989	1.3e-26	-0.37	Cells - Transformed fibroblasts
ENSG00000044459.10	CNTLN	9_17242909_C_G_b37	rs11521161	1.4e-26	0.44	Cells - Transformed fibroblasts
ENSG00000044459.10	CNTLN	9_17246782_T_C_b37	rs10810739	1.5e-26	0.36	Cells - Transformed fibroblasts
ENSG00000044459.10	CNTLN	9_17394136_C_T_b37	rs10283690	1.6e-26	-0.36	Cells - Transformed fibroblasts
ENSG00000044459.10	CNTLN	9_17392921_G_A_b37	rs4961439	1.6e-26	-0.36	Cells - Transformed fibroblasts
ENSG00000044459.10	CNTLN	9_17273175_G_GA_b37	rs397813880	1.7e-26	0.37	Cells - Transformed fibroblasts
ENSG00000044459.10	CNTLN	9_17364950_G_A_b37	rs10738476	1.7e-26	-0.37	Cells - Transformed fibroblasts
ENSG00000044459.10	CNTLN	9_17265321_G_A_b37	rs11560448	1.9e-26	0.36	Cells - Transformed fibroblasts
ENSG00000044459.10	CNTLN	9_17268228_T_C_b37	rs10756858	2e-26	0.36	Cells - Transformed fibroblasts
ENSG00000044459.10	CNTLN	9_17249540_T_G_b37	rs12236820	2.1e-26	0.36	Cells - Transformed fibroblasts
ENSG00000044459.10	CNTLN	9_17391536_A_G_b37	rs1442523	2.5e-26	-0.36	Cells - Transformed fibroblasts
ENSG00000044459.10	CNTLN	9_17339879_C_T_b37	rs7854724	2.6e-26	-0.36	Cells - Transformed fibroblasts
ENSG00000044459.10	CNTLN	9_17356999_C_T_b37	rs10810775	3.5e-26	-0.37	Cells - Transformed fibroblasts
ENSG00000044459.10	CNTLN	9_17357212_T_C_b37	rs4961542	3.5e-26	-0.37	Cells - Transformed fibroblasts
ENSG00000044459.10	CNTLN	9_17447446_C_T_b37	rs2593411	3.6e-26	-0.38	Cells - Transformed fibroblasts
ENSG00000044459.10	CNTLN	9_17391822_G_C_b37	rs1442524	3.7e-26	-0.37	Cells - Transformed fibroblasts
ENSG00000044459.10	CNTLN	9_17249636_T_C_b37	rs7033974	3.8e-26	0.35	Cells - Transformed fibroblasts
ENSG00000044459.10	CNTLN	9_17399095_T_G_b37	rs7041840	4e-26	-0.37	Cells - Transformed fibroblasts
ENSG00000044459.10	CNTLN	9_17391173_A_G_b37	rs10123109	4.6e-26	-0.36	Cells - Transformed fibroblasts
ENSG00000044459.10	CNTLN	9_17358346_G_T_b37	rs4961545	4.6e-26	-0.37	Cells - Transformed fibroblasts
ENSG00000044459.10	CNTLN	9_17358477_A_C_b37	rs4961547	4.6e-26	-0.37	Cells - Transformed fibroblasts
ENSG00000044459.10	CNTLN	9_17379340_T_C_b37	rs36057268	5.2e-26	-0.37	Cells - Transformed fibroblasts
ENSG00000044459.10	CNTLN	9_17398404_G_A_b37	rs4961557	6e-26	-0.36	Cells - Transformed fibroblasts
ENSG00000044459.10	CNTLN	9_17263325_T_A_b37	rs10756857	7.3e-26	0.35	Cells - Transformed fibroblasts
ENSG00000044459.10	CNTLN	9_17269437_G_T_b37	rs10962988	7.5e-26	0.35	Cells - Transformed fibroblasts
ENSG00000044459.10	CNTLN	9_17385348_C_T_b37	rs4961555	9.2e-26	-0.36	Cells - Transformed fibroblasts
ENSG00000044459.10	CNTLN	9_17384459_A_G_b37	rs10810781	9.2e-26	-0.36	Cells - Transformed fibroblasts
ENSG00000044459.10	CNTLN	9_17384923_A_G_b37	rs10121841	9.2e-26	-0.36	Cells - Transformed fibroblasts
ENSG00000044459.10	CNTLN	9_17255442_C_A_b37	rs10962950	2.8e-25	0.36	Cells - Transformed fibroblasts
ENSG00000044459.10	CNTLN	9_17263439_T_G_b37	rs9802710	2.8e-25	0.35	Cells - Transformed fibroblasts
ENSG00000044459.10	CNTLN	9_17266147_C_CT_b37	rs397732161	2.8e-25	0.36	Cells - Transformed fibroblasts
ENSG00000044459.10	CNTLN	9_17350814_G_A_b37	rs7028779	3e-25	-0.36	Cells - Transformed fibroblasts
ENSG00000044459.10	CNTLN	9_17312932_A_G_b37	rs10810750	3.2e-25	-0.36	Cells - Transformed fibroblasts
ENSG00000044459.10	CNTLN	9_17338464_T_C_b37	rs7038197	4.1e-25	-0.37	Cells - Transformed fibroblasts
ENSG00000044459.10	CNTLN	9_17358066_G_A_b37	rs4961544	4.3e-25	-0.37	Cells - Transformed fibroblasts
ENSG00000044459.10	CNTLN	9_17362508_AT_A_b37	rs869075452	5.7e-25	-0.36	Cells - Transformed fibroblasts
ENSG00000044459.10	CNTLN	9_17303467_A_T_b37	rs62558357	5.7e-25	0.44	Cells - Transformed fibroblasts
ENSG00000044459.10	CNTLN	9_17414823_C_A_b37	rs2593387	7.4e-25	-0.36	Cells - Transformed fibroblasts
ENSG00000044459.10	CNTLN	9_17261546_A_G_b37	rs1582030	8.6e-25	0.35	Cells - Transformed fibroblasts
ENSG00000044459.10	CNTLN	9_17261209_G_A_b37	rs1591138	8.8e-25	0.35	Cells - Transformed fibroblasts
ENSG00000044459.10	CNTLN	9_17253882_C_T_b37	rs62558297	1.4e-24	0.43	Cells - Transformed fibroblasts
ENSG00000044459.10	CNTLN	9_17390170_C_T_b37	rs10116093	1.7e-24	-0.36	Cells - Transformed fibroblasts
ENSG00000044459.10	CNTLN	9_17266125_A_T_b37	rs7470216	1.7e-24	0.35	Cells - Transformed fibroblasts
ENSG00000044459.10	CNTLN	9_17413208_C_T_b37	rs34105027	1.7e-24	-0.36	Cells - Transformed fibroblasts
ENSG00000044459.10	CNTLN	9_17330558_T_A_b37	rs3765040	1.9e-24	-0.36	Cells - Transformed fibroblasts
ENSG00000044459.10	CNTLN	9_17331927_G_A_b37	rs3780258	2e-24	-0.36	Cells - Transformed fibroblasts
ENSG00000044459.10	CNTLN	9_17225378_T_A_b37	rs10962916	2.1e-24	0.44	Cells - Transformed fibroblasts
ENSG00000044459.10	CNTLN	9_17241391_C_T_b37	rs10962931	2.2e-24	0.43	Cells - Transformed fibroblasts
ENSG00000044459.10	CNTLN	9_17398616_T_G_b37	rs7038186	2.5e-24	-0.35	Cells - Transformed fibroblasts
ENSG00000044459.10	CNTLN	9_17383073_C_G_b37	rs10114662	2.9e-24	-0.35	Cells - Transformed fibroblasts
ENSG00000044459.10	CNTLN	9_17325675_G_C_b37	rs10756866	3.4e-24	-0.35	Cells - Transformed fibroblasts
ENSG00000044459.10	CNTLN	9_17338186_G_C_b37	rs10963042	3.7e-24	-0.39	Cells - Transformed fibroblasts
ENSG00000044459.10	CNTLN	9_17231465_C_T_b37	rs10756855	3.8e-24	0.35	Cells - Transformed fibroblasts
ENSG00000044459.10	CNTLN	9_17373070_G_A_b37	rs7848397	6.2e-24	-0.36	Cells - Transformed fibroblasts
ENSG00000044459.10	CNTLN	9_17390202_A_G_b37	rs10810782	7.7e-24	-0.35	Cells - Transformed fibroblasts
ENSG00000044459.10	CNTLN	9_17386062_T_C_b37	rs12345267	8.8e-24	-0.35	Cells - Transformed fibroblasts
ENSG00000044459.10	CNTLN	9_17372960_C_T_b37	rs7874453	9.6e-24	-0.36	Cells - Transformed fibroblasts
ENSG00000044459.10	CNTLN	9_17439798_A_G_b37	rs2780198	1.6e-23	-0.35	Cells - Transformed fibroblasts
ENSG00000044459.10	CNTLN	9_17426808_C_G_b37	rs2584554	1.7e-23	-0.35	Cells - Transformed fibroblasts
ENSG00000044459.10	CNTLN	9_17440278_A_G_b37	rs2780199	2.2e-23	-0.34	Cells - Transformed fibroblasts
ENSG00000044459.10	CNTLN	9_17357914_C_T_b37	rs9695844	2.3e-23	-0.36	Cells - Transformed fibroblasts
ENSG00000044459.10	CNTLN	9_17426733_C_T_b37	rs2584553	2.4e-23	-0.35	Cells - Transformed fibroblasts
ENSG00000044459.10	CNTLN	9_17400370_C_G_b37	rs10810786	2.4e-23	-0.35	Cells - Transformed fibroblasts
ENSG00000044459.10	CNTLN	9_17402272_G_A_b37	rs1889114	2.7e-23	-0.34	Cells - Transformed fibroblasts
ENSG00000044459.10	CNTLN	9_17403132_A_G_b37	rs12339564	2.9e-23	-0.34	Cells - Transformed fibroblasts
ENSG00000044459.10	CNTLN	9_17331361_A_AT_b37	rs397781541	3e-23	-0.36	Cells - Transformed fibroblasts
ENSG00000044459.10	CNTLN	9_17426186_G_A_b37	rs2780197	3.1e-23	-0.34	Cells - Transformed fibroblasts
ENSG00000044459.10	CNTLN	9_17246885_GT_G_b37	rs398046453	3.2e-23	0.35	Cells - Transformed fibroblasts
ENSG00000044459.10	CNTLN	9_17435228_G_C_b37	rs2593415	3.8e-23	-0.35	Cells - Transformed fibroblasts
ENSG00000044459.10	CNTLN	9_17385296_C_G_b37	rs62558996	4.4e-23	0.43	Cells - Transformed fibroblasts
ENSG00000044459.10	CNTLN	9_17261350_T_G_b37	rs1582031	7.3e-23	0.34	Cells - Transformed fibroblasts
ENSG00000044459.10	CNTLN	9_17252006_C_A_b37	rs10962947	1.5e-22	0.34	Cells - Transformed fibroblasts
ENSG00000044459.10	CNTLN	9_17379146_A_G_b37	rs1442533	1.5e-22	-0.35	Cells - Transformed fibroblasts
ENSG00000044459.10	CNTLN	9_17398056_A_G_b37	rs62559022	1.6e-22	0.43	Cells - Transformed fibroblasts
ENSG00000044459.10	CNTLN	9_17434009_GA_G_b37	rs34625442	2.3e-22	-0.34	Cells - Transformed fibroblasts
ENSG00000044459.10	CNTLN	9_17435929_G_A_b37	rs2593412	2.3e-22	-0.34	Cells - Transformed fibroblasts
ENSG00000044459.10	CNTLN	9_17435459_A_G_b37	rs2584535	2.3e-22	-0.34	Cells - Transformed fibroblasts
ENSG00000044459.10	CNTLN	9_17254620_A_T_b37	rs7046933	2.3e-22	0.34	Cells - Transformed fibroblasts
ENSG00000044459.10	CNTLN	9_17211990_G_A_b37	rs10962907	2.8e-22	0.38	Cells - Transformed fibroblasts
ENSG00000044459.10	CNTLN	9_17400701_G_T_b37	rs4961559	3.4e-22	0.8	Pancreas
ENSG00000044459.10	CNTLN	9_17401812_TTAA_T_b37	rs34064391	4.8e-22	-0.34	Cells - Transformed fibroblasts
ENSG00000044459.10	CNTLN	9_17254734_A_ATTG_b37	rs367732860	6.3e-22	0.34	Cells - Transformed fibroblasts
ENSG00000044459.10	CNTLN	9_17454685_C_T_b37	rs753393	7.7e-22	-0.34	Cells - Transformed fibroblasts
ENSG00000044459.10	CNTLN	9_17251386_G_A_b37	rs1576962	8.1e-22	0.34	Cells - Transformed fibroblasts
ENSG00000044459.10	CNTLN	9_17412546_T_A_b37	rs7031442	9e-22	0.36	Cells - Transformed fibroblasts
ENSG00000044459.10	CNTLN	9_17410147_A_G_b37	rs12550857	1.5e-21	0.36	Cells - Transformed fibroblasts
ENSG00000044459.10	CNTLN	9_17331446_A_T_b37	rs10810761	1.6e-21	-0.34	Cells - Transformed fibroblasts
ENSG00000044459.10	CNTLN	9_17453931_G_T_b37	rs1808894	1.8e-21	-0.33	Cells - Transformed fibroblasts
ENSG00000044459.10	CNTLN	9_17413556_C_T_b37	rs7019482	2.2e-21	0.35	Cells - Transformed fibroblasts
ENSG00000044459.10	CNTLN	9_17407849_C_T_b37	rs2780212	2.5e-21	-0.33	Cells - Transformed fibroblasts
ENSG00000044459.10	CNTLN	9_17259794_A_G_b37	rs10962953	3.4e-21	0.33	Cells - Transformed fibroblasts
ENSG00000044459.10	CNTLN	9_17328674_A_G_b37	rs10810760	3.4e-21	0.41	Nerve - Tibial
ENSG00000044459.10	CNTLN	9_17331647_G_A_b37	rs10963039	3.8e-21	0.44	Nerve - Tibial
ENSG00000044459.10	CNTLN	9_17413137_G_GATT_b37	rs141477261	3.9e-21	-0.33	Cells - Transformed fibroblasts
ENSG00000044459.10	CNTLN	9_17252284_G_T_b37	rs10810740	4.8e-21	0.34	Cells - Transformed fibroblasts
ENSG00000044459.10	CNTLN	9_17359662_G_A_b37	rs7864270	4.8e-21	-0.36	Cells - Transformed fibroblasts
ENSG00000044459.10	CNTLN	9_17370778_A_G_b37	rs13285577	5e-21	0.43	Nerve - Tibial
ENSG00000044459.10	CNTLN	9_17382575_A_G_b37	rs13283291	5.5e-21	0.79	Pancreas
ENSG00000044459.10	CNTLN	9_17253882_C_T_b37	rs62558297	6.5e-21	0.45	Nerve - Tibial
ENSG00000044459.10	CNTLN	9_17329964_A_G_b37	rs1442528	6.6e-21	0.41	Nerve - Tibial
ENSG00000044459.10	CNTLN	9_17381799_G_A_b37	rs10810780	7.1e-21	0.76	Pancreas
ENSG00000044459.10	CNTLN	9_17409888_C_G_b37	rs2780209	7.8e-21	-0.33	Cells - Transformed fibroblasts
ENSG00000044459.10	CNTLN	9_17312793_A_C_b37	rs61565870	8e-21	0.43	Nerve - Tibial
ENSG00000044459.10	CNTLN	9_17413210_CA_C_b37	rs34931239	8.2e-21	-0.33	Cells - Transformed fibroblasts
ENSG00000044459.10	CNTLN	9_17405331_A_G_b37	rs58474114	8.5e-21	0.76	Pancreas
ENSG00000044459.10	CNTLN	9_17430610_A_G_b37	rs1953105	9e-21	-0.33	Cells - Transformed fibroblasts
ENSG00000044459.10	CNTLN	9_17406022_A_G_b37	rs2584547	9.5e-21	-0.32	Cells - Transformed fibroblasts
ENSG00000044459.10	CNTLN	9_17371019_A_G_b37	rs13289968	1.1e-20	0.43	Nerve - Tibial
ENSG00000044459.10	CNTLN	9_17281278_A_T_b37	rs1889088	1.1e-20	0.41	Nerve - Tibial
ENSG00000044459.10	CNTLN	9_17328476_C_T_b37	rs10756868	1.2e-20	0.4	Nerve - Tibial
ENSG00000044459.10	CNTLN	9_17253518_C_T_b37	rs13290922	1.5e-20	0.33	Cells - Transformed fibroblasts
ENSG00000044459.10	CNTLN	9_17267413_G_T_b37	rs34768018	1.5e-20	0.43	Nerve - Tibial
ENSG00000044459.10	CNTLN	9_17327807_T_C_b37	rs62561379	1.6e-20	0.4	Nerve - Tibial
ENSG00000044459.10	CNTLN	9_17278726_A_G_b37	rs13292550	1.6e-20	0.42	Nerve - Tibial
ENSG00000044459.10	CNTLN	9_17386020_A_G_b37	rs10963077	1.7e-20	0.78	Pancreas
ENSG00000044459.10	CNTLN	9_17323254_C_T_b37	rs10963034	1.7e-20	0.4	Nerve - Tibial
ENSG00000044459.10	CNTLN	9_17326897_G_C_b37	rs10963035	1.7e-20	0.4	Nerve - Tibial
ENSG00000044459.10	CNTLN	9_17343041_C_A_b37	rs10963046	1.7e-20	0.4	Nerve - Tibial
ENSG00000044459.10	CNTLN	9_17365276_C_T_b37	rs62558966	2e-20	0.42	Nerve - Tibial
ENSG00000044459.10	CNTLN	9_17334135_G_A_b37	rs10963041	2e-20	0.42	Nerve - Tibial
ENSG00000044459.10	CNTLN	9_17352810_T_G_b37	rs12376973	2e-20	0.42	Nerve - Tibial
ENSG00000044459.10	CNTLN	9_17326488_T_A_b37	rs10810758	2e-20	0.41	Nerve - Tibial
ENSG00000044459.10	CNTLN	9_17326340_G_A_b37	rs11789786	2e-20	0.43	Nerve - Tibial
ENSG00000044459.10	CNTLN	9_17253289_T_A_b37	rs34597155	2.1e-20	0.42	Nerve - Tibial
ENSG00000044459.10	CNTLN	9_17335706_T_C_b37	rs10810762	2.3e-20	0.42	Nerve - Tibial
ENSG00000044459.10	CNTLN	9_17328201_G_C_b37	rs10810759	2.4e-20	0.42	Nerve - Tibial
ENSG00000044459.10	CNTLN	9_17344707_C_A_b37	rs10963049	2.4e-20	0.4	Nerve - Tibial
ENSG00000044459.10	CNTLN	9_17268590_C_T_b37	rs62558320	2.4e-20	0.42	Nerve - Tibial
ENSG00000044459.10	CNTLN	9_17327587_T_C_b37	rs13293083	2.5e-20	0.4	Nerve - Tibial
ENSG00000044459.10	CNTLN	9_17413173_T_A_b37	rs12555830	2.6e-20	0.35	Cells - Transformed fibroblasts
ENSG00000044459.10	CNTLN	9_17270025_C_G_b37	rs13286311	2.7e-20	0.43	Nerve - Tibial
ENSG00000044459.10	CNTLN	9_17408156_A_G_b37	rs7041659	2.7e-20	0.41	Cells - Transformed fibroblasts
ENSG00000044459.10	CNTLN	9_17385296_C_G_b37	rs62558996	2.8e-20	0.88	Pancreas
ENSG00000044459.10	CNTLN	9_17335050_A_C_b37	rs4317676	3e-20	0.42	Nerve - Tibial
ENSG00000044459.10	CNTLN	9_17428879_C_T_b37	rs2780201	3e-20	-0.33	Cells - Transformed fibroblasts
ENSG00000044459.10	CNTLN	9_17299017_G_A_b37	rs35884270	3e-20	0.43	Nerve - Tibial
ENSG00000044459.10	CNTLN	9_17345018_T_C_b37	rs10963050	3e-20	0.72	Pancreas
ENSG00000044459.10	CNTLN	9_17266340_G_T_b37	rs11523716	3e-20	0.42	Nerve - Tibial
ENSG00000044459.10	CNTLN	9_17262847_C_T_b37	rs13292365	3.1e-20	0.42	Nerve - Tibial
ENSG00000044459.10	CNTLN	9_17291973_C_T_b37	rs12377081	3.5e-20	0.42	Nerve - Tibial
ENSG00000044459.10	CNTLN	9_17296529_C_T_b37	rs10963015	3.5e-20	0.42	Nerve - Tibial
ENSG00000044459.10	CNTLN	9_17297694_C_T_b37	rs17828423	3.5e-20	0.42	Nerve - Tibial
ENSG00000044459.10	CNTLN	9_17303255_C_T_b37	rs17755748	3.5e-20	0.42	Nerve - Tibial
ENSG00000044459.10	CNTLN	9_17291263_A_G_b37	rs34256131	3.6e-20	0.42	Nerve - Tibial
ENSG00000044459.10	CNTLN	9_17303067_T_C_b37	rs1953106	3.6e-20	0.42	Nerve - Tibial
ENSG00000044459.10	CNTLN	9_17311944_T_G_b37	rs10963025	3.6e-20	0.42	Nerve - Tibial
ENSG00000044459.10	CNTLN	9_17283132_G_A_b37	rs7042230	3.6e-20	0.42	Nerve - Tibial
ENSG00000044459.10	CNTLN	9_17343013_A_G_b37	rs10963045	3.7e-20	0.4	Nerve - Tibial
ENSG00000044459.10	CNTLN	9_17343116_A_G_b37	rs10810766	3.7e-20	0.4	Nerve - Tibial
ENSG00000044459.10	CNTLN	9_17343261_G_A_b37	rs10810767	3.7e-20	0.4	Nerve - Tibial
ENSG00000044459.10	CNTLN	9_17343787_C_T_b37	rs10963048	3.7e-20	0.4	Nerve - Tibial
ENSG00000044459.10	CNTLN	9_17343708_G_A_b37	rs10963047	3.7e-20	0.4	Nerve - Tibial
ENSG00000044459.10	CNTLN	9_17261765_A_G_b37	rs10962956	3.8e-20	0.42	Nerve - Tibial
ENSG00000044459.10	CNTLN	9_17303726_A_T_b37	rs10963019	4e-20	0.42	Nerve - Tibial
ENSG00000044459.10	CNTLN	9_17327807_T_C_b37	rs62561379	4.1e-20	0.73	Pancreas
ENSG00000044459.10	CNTLN	9_17299342_T_C_b37	rs10963017	4.3e-20	0.42	Nerve - Tibial
ENSG00000044459.10	CNTLN	9_17370800_A_T_b37	rs13285704	4.3e-20	0.42	Nerve - Tibial
ENSG00000044459.10	CNTLN	9_17325851_G_T_b37	rs7848128	4.5e-20	0.41	Nerve - Tibial
ENSG00000044459.10	CNTLN	9_17358903_G_A_b37	rs11791000	4.5e-20	0.42	Nerve - Tibial
ENSG00000044459.10	CNTLN	9_17346898_T_G_b37	rs13301284	4.5e-20	0.42	Nerve - Tibial
ENSG00000044459.10	CNTLN	9_17362540_G_C_b37	rs12377334	5.1e-20	0.42	Nerve - Tibial
ENSG00000044459.10	CNTLN	9_17453919_G_C_b37	rs1318162	5.3e-20	-0.32	Cells - Transformed fibroblasts
ENSG00000044459.10	CNTLN	9_17343840_C_G_b37	rs12379538	5.4e-20	0.42	Nerve - Tibial
ENSG00000044459.10	CNTLN	9_17310822_T_C_b37	rs13287407	5.7e-20	0.42	Nerve - Tibial
ENSG00000044459.10	CNTLN	9_17284602_C_T_b37	rs2383013	5.8e-20	0.4	Nerve - Tibial
ENSG00000044459.10	CNTLN	9_17343708_G_A_b37	rs10963047	6.5e-20	0.73	Pancreas
ENSG00000044459.10	CNTLN	9_17284641_TTTCTC_T_b37	rs369016594	6.8e-20	0.42	Nerve - Tibial
ENSG00000044459.10	CNTLN	9_17343708_G_A_b37	rs10963047	7.1e-20	0.5	Esophagus - Muscularis
ENSG00000044459.10	CNTLN	9_17327135_T_TA_b37	rs71492912	7.3e-20	0.5	Esophagus - Muscularis
ENSG00000044459.10	CNTLN	9_17406235_A_G_b37	rs36051199	8.2e-20	0.79	Pancreas
ENSG00000044459.10	CNTLN	9_17284111_A_C_b37	rs4574939	8.2e-20	0.4	Nerve - Tibial
ENSG00000044459.10	CNTLN	9_17345018_T_C_b37	rs10963050	8.2e-20	0.4	Nerve - Tibial
ENSG00000044459.10	CNTLN	9_17274815_C_G_b37	rs10962993	8.3e-20	0.4	Nerve - Tibial
ENSG00000044459.10	CNTLN	9_17266095_C_G_b37	rs11523726	8.5e-20	0.42	Nerve - Tibial
ENSG00000044459.10	CNTLN	9_17454593_G_A_b37	rs894379	8.7e-20	-0.42	Nerve - Tibial
ENSG00000044459.10	CNTLN	9_17343041_C_A_b37	rs10963046	8.9e-20	0.72	Pancreas
ENSG00000044459.10	CNTLN	9_17326897_G_C_b37	rs10963035	8.9e-20	0.72	Pancreas
ENSG00000044459.10	CNTLN	9_17328674_A_G_b37	rs10810760	9.4e-20	0.73	Pancreas
ENSG00000044459.10	CNTLN	9_17329964_A_G_b37	rs1442528	9.5e-20	0.5	Esophagus - Muscularis
ENSG00000044459.10	CNTLN	9_17327587_T_C_b37	rs13293083	1e-19	0.73	Pancreas
ENSG00000044459.10	CNTLN	9_17383993_G_T_b37	rs12156444	1e-19	0.79	Pancreas
ENSG00000044459.10	CNTLN	9_17378776_G_A_b37	rs10963072	1e-19	0.45	Nerve - Tibial
ENSG00000044459.10	CNTLN	9_17324158_G_C_b37	rs17829280	1.1e-19	0.41	Nerve - Tibial
ENSG00000044459.10	CNTLN	9_17279051_GAAC_G_b37	rs367907570	1.1e-19	0.42	Nerve - Tibial
ENSG00000044459.10	CNTLN	9_17379615_C_A_b37	rs10963073	1.1e-19	0.42	Nerve - Tibial
ENSG00000044459.10	CNTLN	9_17343787_C_T_b37	rs10963048	1.2e-19	0.72	Pancreas
ENSG00000044459.10	CNTLN	9_17344707_C_A_b37	rs10963049	1.2e-19	0.49	Esophagus - Muscularis
ENSG00000044459.10	CNTLN	9_17394225_C_T_b37	rs10963078	1.2e-19	0.42	Nerve - Tibial
ENSG00000044459.10	CNTLN	9_17326249_T_A_b37	rs10810757	1.3e-19	0.4	Nerve - Tibial
ENSG00000044459.10	CNTLN	9_17325851_G_T_b37	rs7848128	1.3e-19	0.49	Esophagus - Muscularis
ENSG00000044459.10	CNTLN	9_17273731_A_G_b37	rs3808795	1.4e-19	0.4	Nerve - Tibial
ENSG00000044459.10	CNTLN	9_17282659_G_A_b37	rs35968717	1.4e-19	0.4	Nerve - Tibial
ENSG00000044459.10	CNTLN	9_17257324_A_G_b37	rs62558301	1.4e-19	0.42	Nerve - Tibial
ENSG00000044459.10	CNTLN	9_17323254_C_T_b37	rs10963034	1.4e-19	0.72	Pancreas
ENSG00000044459.10	CNTLN	9_17343013_A_G_b37	rs10963045	1.5e-19	0.72	Pancreas
ENSG00000044459.10	CNTLN	9_17343116_A_G_b37	rs10810766	1.5e-19	0.72	Pancreas
ENSG00000044459.10	CNTLN	9_17343261_G_A_b37	rs10810767	1.5e-19	0.72	Pancreas
ENSG00000044459.10	CNTLN	9_17344707_C_A_b37	rs10963049	1.5e-19	0.72	Pancreas
ENSG00000044459.10	CNTLN	9_17329964_A_G_b37	rs1442528	1.5e-19	0.72	Pancreas
ENSG00000044459.10	CNTLN	9_17328476_C_T_b37	rs10756868	1.5e-19	0.72	Pancreas
ENSG00000044459.10	CNTLN	9_17268228_T_C_b37	rs10756858	1.5e-19	0.44	Esophagus - Muscularis
ENSG00000044459.10	CNTLN	9_17342571_GA_G_b37	rs68056113	1.6e-19	0.73	Pancreas
ENSG00000044459.10	CNTLN	9_17277778_T_A_b37	rs4375098	1.6e-19	0.4	Nerve - Tibial
ENSG00000044459.10	CNTLN	9_17359669_G_A_b37	rs7864271	1.6e-19	-0.35	Cells - Transformed fibroblasts
ENSG00000044459.10	CNTLN	9_17343013_A_G_b37	rs10963045	1.6e-19	0.49	Esophagus - Muscularis
ENSG00000044459.10	CNTLN	9_17343116_A_G_b37	rs10810766	1.6e-19	0.49	Esophagus - Muscularis
ENSG00000044459.10	CNTLN	9_17343261_G_A_b37	rs10810767	1.6e-19	0.49	Esophagus - Muscularis
ENSG00000044459.10	CNTLN	9_17265946_G_T_b37	rs13289755	1.7e-19	0.42	Nerve - Tibial
ENSG00000044459.10	CNTLN	9_17283020_A_G_b37	rs7041744	1.8e-19	0.39	Nerve - Tibial
ENSG00000044459.10	CNTLN	9_17283597_C_G_b37	rs10810746	1.8e-19	0.39	Nerve - Tibial
ENSG00000044459.10	CNTLN	9_17283690_T_C_b37	rs10963005	1.8e-19	0.39	Nerve - Tibial
ENSG00000044459.10	CNTLN	9_17284013_TTTTG_T_b37	rs373542765	1.8e-19	0.39	Nerve - Tibial
ENSG00000044459.10	CNTLN	9_17284073_A_G_b37	rs4626705	1.8e-19	0.39	Nerve - Tibial
ENSG00000044459.10	CNTLN	9_17281923_G_A_b37	rs10963000	1.8e-19	0.39	Nerve - Tibial
ENSG00000044459.10	CNTLN	9_17345018_T_C_b37	rs10963050	2e-19	0.49	Esophagus - Muscularis
ENSG00000044459.10	CNTLN	9_17257157_A_T_b37	rs62558300	2.1e-19	0.42	Nerve - Tibial
ENSG00000044459.10	CNTLN	9_17327807_T_C_b37	rs62561379	2.1e-19	0.49	Esophagus - Muscularis
ENSG00000044459.10	CNTLN	9_17380962_C_G_b37	rs7028577	2.1e-19	0.42	Nerve - Tibial
ENSG00000044459.10	CNTLN	9_17282186_G_C_b37	rs10963001	2.2e-19	0.39	Nerve - Tibial
ENSG00000044459.10	CNTLN	9_17398056_A_G_b37	rs62559022	2.3e-19	0.86	Pancreas
ENSG00000044459.10	CNTLN	9_17310385_G_C_b37	rs10963022	2.4e-19	0.42	Nerve - Tibial
ENSG00000044459.10	CNTLN	9_17283550_T_G_b37	rs10810745	2.4e-19	0.39	Nerve - Tibial
ENSG00000044459.10	CNTLN	9_17454593_G_A_b37	rs894379	2.4e-19	-0.78	Pancreas
ENSG00000044459.10	CNTLN	9_17342571_GA_G_b37	rs68056113	2.5e-19	0.4	Nerve - Tibial
ENSG00000044459.10	CNTLN	9_17327135_T_TA_b37	rs71492912	2.5e-19	0.73	Pancreas
ENSG00000044459.10	CNTLN	9_17230928_T_C_b37	rs75110373	2.6e-19	1.3	Pancreas
ENSG00000044459.10	CNTLN	9_17274331_T_A_b37	rs13290659	2.6e-19	0.4	Nerve - Tibial
ENSG00000044459.10	CNTLN	9_17265490_C_G_b37	rs13288652	2.8e-19	0.4	Nerve - Tibial
ENSG00000044459.10	CNTLN	9_17273628_C_CAG_b37	rs3840729	2.8e-19	0.4	Nerve - Tibial
ENSG00000044459.10	CNTLN	9_17266147_C_CT_b37	rs397732161	2.8e-19	0.44	Esophagus - Muscularis
ENSG00000044459.10	CNTLN	9_17289795_G_T_b37	rs140810883	3e-19	0.42	Nerve - Tibial
ENSG00000044459.10	CNTLN	9_17343787_C_T_b37	rs10963048	3e-19	0.49	Esophagus - Muscularis
ENSG00000044459.10	CNTLN	9_17382575_A_G_b37	rs13283291	3e-19	0.4	Nerve - Tibial
ENSG00000044459.10	CNTLN	9_17327135_T_TA_b37	rs71492912	3.1e-19	0.4	Nerve - Tibial
ENSG00000044459.10	CNTLN	9_17394225_C_T_b37	rs10963078	3.1e-19	0.78	Pancreas
ENSG00000044459.10	CNTLN	9_17370957_G_A_b37	rs13286365	3.1e-19	0.42	Nerve - Tibial
ENSG00000044459.10	CNTLN	9_17383993_G_T_b37	rs12156444	3.2e-19	0.41	Nerve - Tibial
ENSG00000044459.10	CNTLN	9_17372689_C_G_b37	rs10963069	3.2e-19	0.41	Nerve - Tibial
ENSG00000044459.10	CNTLN	9_17272312_A_G_b37	rs12376505	3.3e-19	0.41	Nerve - Tibial
ENSG00000044459.10	CNTLN	9_17342571_GA_G_b37	rs68056113	3.3e-19	0.49	Esophagus - Muscularis
ENSG00000044459.10	CNTLN	9_17359162_G_A_b37	rs10810776	3.4e-19	0.41	Nerve - Tibial
ENSG00000044459.10	CNTLN	9_17263325_T_A_b37	rs10756857	3.4e-19	0.43	Esophagus - Muscularis
ENSG00000044459.10	CNTLN	9_17281271_A_AT_b37	rs397743400	3.4e-19	0.41	Nerve - Tibial
ENSG00000044459.10	CNTLN	9_17276104_T_C_b37	rs2027014	3.5e-19	0.39	Nerve - Tibial
ENSG00000044459.10	CNTLN	9_17328674_A_G_b37	rs10810760	3.6e-19	0.49	Esophagus - Muscularis
ENSG00000044459.10	CNTLN	9_17326897_G_C_b37	rs10963035	3.8e-19	0.48	Esophagus - Muscularis
ENSG00000044459.10	CNTLN	9_17343041_C_A_b37	rs10963046	3.8e-19	0.48	Esophagus - Muscularis
ENSG00000044459.10	CNTLN	9_17364272_T_C_b37	rs35601090	3.9e-19	0.41	Nerve - Tibial
ENSG00000044459.10	CNTLN	9_17326488_T_A_b37	rs10810758	4.1e-19	0.49	Esophagus - Muscularis
ENSG00000044459.10	CNTLN	9_17325281_CAT_C_b37	rs796494963	4.1e-19	0.73	Pancreas
ENSG00000044459.10	CNTLN	9_17328476_C_T_b37	rs10756868	4.2e-19	0.48	Esophagus - Muscularis
ENSG00000044459.10	CNTLN	9_17326202_C_A_b37	rs11789741	4.3e-19	0.42	Nerve - Tibial
ENSG00000044459.10	CNTLN	9_17242708_G_C_b37	rs10756856	4.3e-19	0.31	Cells - Transformed fibroblasts
ENSG00000044459.10	CNTLN	9_17262898_C_G_b37	rs13292380	4.5e-19	0.41	Nerve - Tibial
ENSG00000044459.10	CNTLN	9_17278607_C_T_b37	rs34502029	4.6e-19	0.39	Nerve - Tibial
ENSG00000044459.10	CNTLN	9_17454820_G_A_b37	rs1372703	4.6e-19	-0.41	Nerve - Tibial
ENSG00000044459.10	CNTLN	9_17323254_C_T_b37	rs10963034	4.7e-19	0.48	Esophagus - Muscularis
ENSG00000044459.10	CNTLN	9_17353732_G_A_b37	rs13289670	4.7e-19	0.41	Nerve - Tibial
ENSG00000044459.10	CNTLN	9_17345387_A_ATAGT_b37	rs59007332	4.8e-19	0.7	Pancreas
ENSG00000044459.10	CNTLN	9_17265321_G_A_b37	rs11560448	5e-19	0.43	Esophagus - Muscularis
ENSG00000044459.10	CNTLN	9_17327587_T_C_b37	rs13293083	5.1e-19	0.48	Esophagus - Muscularis
ENSG00000044459.10	CNTLN	9_17273628_C_CAG_b37	rs3840729	5.1e-19	0.77	Pancreas
ENSG00000044459.10	CNTLN	9_17325851_G_T_b37	rs7848128	5.1e-19	0.73	Pancreas
ENSG00000044459.10	CNTLN	9_17273878_A_G_b37	rs12376938	5.3e-19	0.8	Pancreas
ENSG00000044459.10	CNTLN	9_17262160_T_C_b37	rs10962959	5.7e-19	0.79	Pancreas
ENSG00000044459.10	CNTLN	9_17273926_C_G_b37	rs12379655	5.8e-19	0.77	Pancreas
ENSG00000044459.10	CNTLN	9_17321313_C_G_b37	rs10963031	6e-19	0.4	Nerve - Tibial
ENSG00000044459.10	CNTLN	9_17321712_T_C_b37	rs10810755	6e-19	0.4	Nerve - Tibial
ENSG00000044459.10	CNTLN	9_17334075_T_G_b37	rs10963040	6e-19	0.4	Nerve - Tibial
ENSG00000044459.10	CNTLN	9_17269437_G_T_b37	rs10962988	6e-19	0.43	Esophagus - Muscularis
ENSG00000044459.10	CNTLN	9_17321039_T_G_b37	rs10963030	6.3e-19	0.4	Nerve - Tibial
ENSG00000044459.10	CNTLN	9_17435383_G_A_b37	rs2593414	6.3e-19	-0.31	Cells - Transformed fibroblasts
ENSG00000044459.10	CNTLN	9_17328928_C_T_b37	rs12553068	6.4e-19	0.73	Pancreas
ENSG00000044459.10	CNTLN	9_17284805_T_C_b37	rs2095156	6.6e-19	0.41	Nerve - Tibial
ENSG00000044459.10	CNTLN	9_17273731_A_G_b37	rs3808795	6.6e-19	0.77	Pancreas
ENSG00000044459.10	CNTLN	9_17360399_G_T_b37	rs35375281	6.7e-19	0.41	Nerve - Tibial
ENSG00000044459.10	CNTLN	9_17348143_A_T_b37	rs12378677	6.7e-19	0.41	Nerve - Tibial
ENSG00000044459.10	CNTLN	9_17353904_C_T_b37	rs10963060	6.7e-19	0.41	Nerve - Tibial
ENSG00000044459.10	CNTLN	9_17355032_C_T_b37	rs10810772	6.7e-19	0.41	Nerve - Tibial
ENSG00000044459.10	CNTLN	9_17291778_T_C_b37	rs7867175	7.2e-19	0.4	Nerve - Tibial
ENSG00000044459.10	CNTLN	9_17386020_A_G_b37	rs10963077	7.3e-19	0.4	Nerve - Tibial
ENSG00000044459.10	CNTLN	9_17273926_C_G_b37	rs12379655	8.4e-19	0.39	Nerve - Tibial
ENSG00000044459.10	CNTLN	9_17249911_T_A_b37	rs10962944	8.4e-19	0.78	Pancreas
ENSG00000044459.10	CNTLN	9_17384521_C_A_b37	rs1442517	8.4e-19	0.79	Pancreas
ENSG00000044459.10	CNTLN	9_17300057_A_C_b37	rs60520802	8.5e-19	0.4	Nerve - Tibial
ENSG00000044459.10	CNTLN	9_17358463_A_G_b37	rs10963065	9.1e-19	0.42	Nerve - Tibial
ENSG00000044459.10	CNTLN	9_17292165_T_C_b37	rs11515075	9.3e-19	0.4	Nerve - Tibial
ENSG00000044459.10	CNTLN	9_17298547_C_G_b37	rs3739490	9.3e-19	0.4	Nerve - Tibial
ENSG00000044459.10	CNTLN	9_17301713_A_G_b37	rs10963018	9.6e-19	0.41	Nerve - Tibial
ENSG00000044459.10	CNTLN	9_17368850_C_T_b37	rs2151342	9.8e-19	0.41	Nerve - Tibial
ENSG00000044459.10	CNTLN	9_17241391_C_T_b37	rs10962931	1e-18	0.43	Nerve - Tibial
ENSG00000044459.10	CNTLN	9_17325281_CAT_C_b37	rs796494963	1e-18	0.4	Nerve - Tibial
ENSG00000044459.10	CNTLN	9_17265477_C_G_b37	rs13288642	1.1e-18	0.4	Nerve - Tibial
ENSG00000044459.10	CNTLN	9_17275314_T_C_b37	rs10810743	1.1e-18	0.4	Nerve - Tibial
ENSG00000044459.10	CNTLN	9_17381799_G_A_b37	rs10810780	1.1e-18	0.38	Nerve - Tibial
ENSG00000044459.10	CNTLN	9_17272312_A_G_b37	rs12376505	1.2e-18	0.79	Pancreas
ENSG00000044459.10	CNTLN	9_17386062_T_C_b37	rs12345267	1.3e-18	-0.43	Esophagus - Muscularis
ENSG00000044459.10	CNTLN	9_17406235_A_G_b37	rs36051199	1.3e-18	0.4	Nerve - Tibial
ENSG00000044459.10	CNTLN	9_17328995_A_G_b37	rs12555618	1.3e-18	0.71	Pancreas
ENSG00000044459.10	CNTLN	9_17402272_G_A_b37	rs1889114	1.4e-18	-0.43	Esophagus - Muscularis
ENSG00000044459.10	CNTLN	9_17290094_A_T_b37	rs114658868	1.4e-18	0.4	Nerve - Tibial
ENSG00000044459.10	CNTLN	9_17299120_A_G_b37	rs7026852	1.4e-18	0.4	Nerve - Tibial
ENSG00000044459.10	CNTLN	9_17454799_A_G_b37	rs2593382	1.4e-18	-0.31	Cells - Transformed fibroblasts
ENSG00000044459.10	CNTLN	9_17274331_T_A_b37	rs13290659	1.4e-18	0.75	Pancreas
ENSG00000044459.10	CNTLN	9_17403132_A_G_b37	rs12339564	1.4e-18	-0.43	Esophagus - Muscularis
ENSG00000044459.10	CNTLN	9_17267413_G_T_b37	rs34768018	1.4e-18	0.79	Pancreas
ENSG00000044459.10	CNTLN	9_17268590_C_T_b37	rs62558320	1.4e-18	0.79	Pancreas
ENSG00000044459.10	CNTLN	9_17281961_C_CT_b37	rs397893175	1.5e-18	0.4	Nerve - Tibial
ENSG00000044459.10	CNTLN	9_17273878_A_G_b37	rs12376938	1.5e-18	0.4	Nerve - Tibial
ENSG00000044459.10	CNTLN	9_17328995_A_G_b37	rs12555618	1.6e-18	0.39	Nerve - Tibial
ENSG00000044459.10	CNTLN	9_17426808_C_G_b37	rs2584554	1.6e-18	-0.43	Esophagus - Muscularis
ENSG00000044459.10	CNTLN	9_17425664_C_G_b37	rs1348278	1.7e-18	0.37	Nerve - Tibial
ENSG00000044459.10	CNTLN	9_17345387_A_ATAGT_b37	rs59007332	1.8e-18	0.38	Nerve - Tibial
ENSG00000044459.10	CNTLN	9_17425664_C_G_b37	rs1348278	1.8e-18	0.68	Pancreas
ENSG00000044459.10	CNTLN	9_17271479_GT_G_b37	rs397736711	1.9e-18	0.4	Nerve - Tibial
ENSG00000044459.10	CNTLN	9_17413210_CA_C_b37	rs34931239	1.9e-18	-0.44	Esophagus - Muscularis
ENSG00000044459.10	CNTLN	9_17299872_T_A_b37	rs62558354	1.9e-18	0.4	Nerve - Tibial
ENSG00000044459.10	CNTLN	9_17446292_C_T_b37	rs2584537	1.9e-18	-0.3	Cells - Transformed fibroblasts
ENSG00000044459.10	CNTLN	9_17384521_C_A_b37	rs1442517	2e-18	0.41	Nerve - Tibial
ENSG00000044459.10	CNTLN	9_17372261_G_T_b37	rs12379104	2e-18	-0.44	Esophagus - Muscularis
ENSG00000044459.10	CNTLN	9_17262062_G_A_b37	rs10962958	2.1e-18	0.4	Nerve - Tibial
ENSG00000044459.10	CNTLN	9_17263748_T_G_b37	rs145190003	2.2e-18	0.4	Nerve - Tibial
ENSG00000044459.10	CNTLN	9_17399095_T_G_b37	rs7041840	2.2e-18	-0.65	Pancreas
ENSG00000044459.10	CNTLN	9_17425664_C_G_b37	rs1348278	2.3e-18	0.45	Esophagus - Muscularis
ENSG00000044459.10	CNTLN	9_17326249_T_A_b37	rs10810757	2.3e-18	0.7	Pancreas
ENSG00000044459.10	CNTLN	9_17409709_C_CA_b37	rs397756102	2.4e-18	0.76	Pancreas
ENSG00000044459.10	CNTLN	9_17259049_C_G_b37	rs113101695	2.5e-18	0.41	Nerve - Tibial
ENSG00000044459.10	CNTLN	9_17242909_C_G_b37	rs11521161	2.5e-18	0.43	Nerve - Tibial
ENSG00000044459.10	CNTLN	9_17400370_C_G_b37	rs10810786	2.5e-18	-0.42	Esophagus - Muscularis
ENSG00000044459.10	CNTLN	9_17345387_A_ATAGT_b37	rs59007332	2.6e-18	0.47	Esophagus - Muscularis
ENSG00000044459.10	CNTLN	9_17348143_A_T_b37	rs12378677	2.7e-18	0.78	Pancreas
ENSG00000044459.10	CNTLN	9_17359162_G_A_b37	rs10810776	2.7e-18	0.78	Pancreas
ENSG00000044459.10	CNTLN	9_17360399_G_T_b37	rs35375281	2.7e-18	0.78	Pancreas
ENSG00000044459.10	CNTLN	9_17368850_C_T_b37	rs2151342	2.7e-18	0.78	Pancreas
ENSG00000044459.10	CNTLN	9_17353732_G_A_b37	rs13289670	2.7e-18	0.78	Pancreas
ENSG00000044459.10	CNTLN	9_17353904_C_T_b37	rs10963060	2.7e-18	0.78	Pancreas
ENSG00000044459.10	CNTLN	9_17355032_C_T_b37	rs10810772	2.7e-18	0.78	Pancreas
ENSG00000044459.10	CNTLN	9_17413137_G_GATT_b37	rs141477261	2.9e-18	-0.43	Esophagus - Muscularis
ENSG00000044459.10	CNTLN	9_17262160_T_C_b37	rs10962959	2.9e-18	0.4	Nerve - Tibial
ENSG00000044459.10	CNTLN	9_17326249_T_A_b37	rs10810757	2.9e-18	0.48	Esophagus - Muscularis
ENSG00000044459.10	CNTLN	9_17379340_T_C_b37	rs36057268	3e-18	-0.43	Esophagus - Muscularis
ENSG00000044459.10	CNTLN	9_17275039_C_G_b37	rs10962994	3e-18	0.39	Nerve - Tibial
ENSG00000044459.10	CNTLN	9_17269126_G_A_b37	rs59833414	3.3e-18	0.4	Nerve - Tibial
ENSG00000044459.10	CNTLN	9_17303467_A_T_b37	rs62558357	3.3e-18	0.85	Pancreas
ENSG00000044459.10	CNTLN	9_17435459_A_G_b37	rs2584535	3.4e-18	-0.43	Esophagus - Muscularis
ENSG00000044459.10	CNTLN	9_17435929_G_A_b37	rs2593412	3.4e-18	-0.43	Esophagus - Muscularis
ENSG00000044459.10	CNTLN	9_17292845_AG_A_b37	rs35876302	3.5e-18	0.4	Nerve - Tibial
ENSG00000044459.10	CNTLN	9_17281216_G_A_b37	rs10962996	3.5e-18	0.4	Nerve - Tibial
ENSG00000044459.10	CNTLN	9_17426733_C_T_b37	rs2584553	3.5e-18	-0.43	Esophagus - Muscularis
ENSG00000044459.10	CNTLN	9_17430610_A_G_b37	rs1953105	3.9e-18	-0.43	Esophagus - Muscularis
ENSG00000044459.10	CNTLN	9_17398404_G_A_b37	rs4961557	3.9e-18	-0.64	Pancreas
ENSG00000044459.10	CNTLN	9_17281497_C_T_b37	rs10962998	4e-18	0.4	Nerve - Tibial
ENSG00000044459.10	CNTLN	9_17281538_G_T_b37	rs10962999	4e-18	0.4	Nerve - Tibial
ENSG00000044459.10	CNTLN	9_17442085_A_G_b37	rs2584536	4.3e-18	-0.31	Cells - Transformed fibroblasts
ENSG00000044459.10	CNTLN	9_17270025_C_G_b37	rs13286311	4.7e-18	0.78	Pancreas
ENSG00000044459.10	CNTLN	9_17398616_T_G_b37	rs7038186	4.7e-18	-0.42	Esophagus - Muscularis
ENSG00000044459.10	CNTLN	9_17326488_T_A_b37	rs10810758	4.8e-18	0.71	Pancreas
ENSG00000044459.10	CNTLN	9_17225378_T_A_b37	rs10962916	4.9e-18	0.87	Pancreas
ENSG00000044459.10	CNTLN	9_17359939_C_T_b37	rs7037111	5.2e-18	-0.42	Esophagus - Muscularis
ENSG00000044459.10	CNTLN	9_17361597_A_G_b37	rs7022060	5.3e-18	-0.64	Pancreas
ENSG00000044459.10	CNTLN	9_17372960_C_T_b37	rs7874453	5.6e-18	-0.44	Esophagus - Muscularis
ENSG00000044459.10	CNTLN	9_17265852_T_A_b37	rs62252889	5.6e-18	0.39	Nerve - Tibial
ENSG00000044459.10	CNTLN	9_17426186_G_A_b37	rs2780197	6.9e-18	-0.43	Esophagus - Muscularis
ENSG00000044459.10	CNTLN	9_17379615_C_A_b37	rs10963073	7e-18	0.8	Pancreas
ENSG00000044459.10	CNTLN	9_17331446_A_T_b37	rs10810761	7.3e-18	-0.43	Esophagus - Muscularis
ENSG00000044459.10	CNTLN	9_17333747_CAT_C_b37	rs3840727	7.3e-18	-0.42	Esophagus - Muscularis
ENSG00000044459.10	CNTLN	9_17269629_T_C_b37	rs35998538	7.6e-18	0.41	Nerve - Tibial
ENSG00000044459.10	CNTLN	9_17370081_G_C_b37	rs12553516	7.7e-18	0.72	Pancreas
ENSG00000044459.10	CNTLN	9_17379146_A_G_b37	rs1442533	7.9e-18	-0.43	Esophagus - Muscularis
ENSG00000044459.10	CNTLN	9_17328995_A_G_b37	rs12555618	8.1e-18	0.47	Esophagus - Muscularis
ENSG00000044459.10	CNTLN	9_17400701_G_T_b37	rs4961559	8.6e-18	0.38	Nerve - Tibial
ENSG00000044459.10	CNTLN	9_17261546_A_G_b37	rs1582030	8.6e-18	0.42	Esophagus - Muscularis
ENSG00000044459.10	CNTLN	9_17440278_A_G_b37	rs2780199	8.8e-18	-0.42	Esophagus - Muscularis
ENSG00000044459.10	CNTLN	9_17428879_C_T_b37	rs2780201	8.8e-18	-0.44	Esophagus - Muscularis
ENSG00000044459.10	CNTLN	9_17361597_A_G_b37	rs7022060	8.9e-18	-0.42	Esophagus - Muscularis
ENSG00000044459.10	CNTLN	9_17328928_C_T_b37	rs12553068	9e-18	0.48	Esophagus - Muscularis
ENSG00000044459.10	CNTLN	9_17366296_A_ATTG_b37	rs10686546	9.1e-18	-0.44	Esophagus - Muscularis
ENSG00000044459.10	CNTLN	9_17380998_T_A_b37	rs10756878	9.2e-18	-0.42	Esophagus - Muscularis
ENSG00000044459.10	CNTLN	9_17263439_T_G_b37	rs9802710	9.3e-18	0.41	Esophagus - Muscularis
ENSG00000044459.10	CNTLN	9_17249911_T_A_b37	rs10962944	9.5e-18	0.39	Nerve - Tibial
ENSG00000044459.10	CNTLN	9_17276775_G_A_b37	rs2184063	9.6e-18	0.38	Nerve - Tibial
ENSG00000044459.10	CNTLN	9_17276823_G_A_b37	rs11795325	9.7e-18	0.38	Nerve - Tibial
ENSG00000044459.10	CNTLN	9_17407849_C_T_b37	rs2780212	9.8e-18	-0.43	Esophagus - Muscularis
ENSG00000044459.10	CNTLN	9_17302341_A_G_b37	rs619380	9.9e-18	0.42	Esophagus - Muscularis
ENSG00000044459.10	CNTLN	9_17309336_T_C_b37	rs10756860	9.9e-18	-0.42	Esophagus - Muscularis
ENSG00000044459.10	CNTLN	9_17265946_G_T_b37	rs13289755	1e-17	0.77	Pancreas
ENSG00000044459.10	CNTLN	9_17355341_T_C_b37	rs10963063	1.1e-17	-0.42	Esophagus - Muscularis
ENSG00000044459.10	CNTLN	9_17347872_C_T_b37	rs7865766	1.1e-17	-0.42	Esophagus - Muscularis
ENSG00000044459.10	CNTLN	9_17154345_A_T_b37	rs10448195	1.1e-17	0.42	Nerve - Tibial
ENSG00000044459.10	CNTLN	9_17357365_A_T_b37	rs10963064	1.2e-17	0.41	Nerve - Tibial
ENSG00000044459.10	CNTLN	9_17391173_A_G_b37	rs10123109	1.2e-17	-0.63	Pancreas
ENSG00000044459.10	CNTLN	9_17373070_G_A_b37	rs7848397	1.3e-17	-0.43	Esophagus - Muscularis
ENSG00000044459.10	CNTLN	9_17313678_T_A_b37	rs7864650	1.3e-17	-0.42	Esophagus - Muscularis
ENSG00000044459.10	CNTLN	9_17371690_C_T_b37	rs1596193	1.3e-17	-0.42	Esophagus - Muscularis
ENSG00000044459.10	CNTLN	9_17418425_T_G_b37	rs1442516	1.3e-17	0.7	Pancreas
ENSG00000044459.10	CNTLN	9_17355341_T_C_b37	rs10963063	1.3e-17	-0.64	Pancreas
ENSG00000044459.10	CNTLN	9_17351711_A_G_b37	rs6475143	1.3e-17	-0.44	Esophagus - Muscularis
ENSG00000044459.10	CNTLN	9_17380962_C_G_b37	rs7028577	1.4e-17	0.75	Pancreas
ENSG00000044459.10	CNTLN	9_17434009_GA_G_b37	rs34625442	1.5e-17	-0.43	Esophagus - Muscularis
ENSG00000044459.10	CNTLN	9_17313415_C_CT_b37	rs139376119	1.5e-17	0.42	Nerve - Tibial
ENSG00000044459.10	CNTLN	9_17299017_G_A_b37	rs35884270	1.5e-17	0.76	Pancreas
ENSG00000044459.10	CNTLN	9_17398616_T_G_b37	rs7038186	1.6e-17	-0.64	Pancreas
ENSG00000044459.10	CNTLN	9_17353077_G_T_b37	rs10114730	1.6e-17	-0.44	Esophagus - Muscularis
ENSG00000044459.10	CNTLN	9_17353087_A_G_b37	rs10120757	1.6e-17	-0.44	Esophagus - Muscularis
ENSG00000044459.10	CNTLN	9_17353096_C_T_b37	rs10114688	1.6e-17	-0.44	Esophagus - Muscularis
ENSG00000044459.10	CNTLN	9_17374797_T_G_b37	rs6475147	1.6e-17	-0.42	Esophagus - Muscularis
ENSG00000044459.10	CNTLN	9_17412546_T_A_b37	rs7031442	1.7e-17	0.71	Pancreas
ENSG00000044459.10	CNTLN	9_17335050_A_C_b37	rs4317676	1.7e-17	0.77	Pancreas
ENSG00000044459.10	CNTLN	9_17414823_C_A_b37	rs2593387	1.7e-17	-0.26	Adipose - Subcutaneous
ENSG00000044459.10	CNTLN	9_17350814_G_A_b37	rs7028779	1.7e-17	-0.44	Esophagus - Muscularis
ENSG00000044459.10	CNTLN	9_17359939_C_T_b37	rs7037111	1.7e-17	-0.64	Pancreas
ENSG00000044459.10	CNTLN	9_17439798_A_G_b37	rs2780198	1.7e-17	-0.43	Esophagus - Muscularis
ENSG00000044459.10	CNTLN	9_17358477_A_C_b37	rs4961547	1.7e-17	-0.44	Esophagus - Muscularis
ENSG00000044459.10	CNTLN	9_17252006_C_A_b37	rs10962947	1.9e-17	0.42	Esophagus - Muscularis
ENSG00000044459.10	CNTLN	9_17349497_A_G_b37	rs10963057	1.9e-17	-0.43	Esophagus - Muscularis
ENSG00000044459.10	CNTLN	9_17349834_T_A_b37	rs2044120	1.9e-17	-0.43	Esophagus - Muscularis
ENSG00000044459.10	CNTLN	9_17349864_C_T_b37	rs2044119	1.9e-17	-0.43	Esophagus - Muscularis
ENSG00000044459.10	CNTLN	9_17358346_G_T_b37	rs4961545	1.9e-17	-0.44	Esophagus - Muscularis
ENSG00000044459.10	CNTLN	9_17364514_T_C_b37	rs10122987	1.9e-17	-0.43	Esophagus - Muscularis
ENSG00000044459.10	CNTLN	9_17366568_A_T_b37	rs4961548	2e-17	-0.43	Esophagus - Muscularis
ENSG00000044459.10	CNTLN	9_17346404_A_G_b37	rs10119370	2e-17	-0.43	Esophagus - Muscularis
ENSG00000044459.10	CNTLN	9_17350378_A_C_b37	rs6475141	2e-17	-0.43	Esophagus - Muscularis
ENSG00000044459.10	CNTLN	9_17350631_G_A_b37	rs6475142	2e-17	-0.43	Esophagus - Muscularis
ENSG00000044459.10	CNTLN	9_17350983_C_G_b37	rs10124513	2.1e-17	-0.44	Esophagus - Muscularis
ENSG00000044459.10	CNTLN	9_17352005_G_A_b37	rs6475144	2.1e-17	-0.43	Esophagus - Muscularis
ENSG00000044459.10	CNTLN	9_17255226_T_A_b37	rs10962949	2.1e-17	0.39	Nerve - Tibial
ENSG00000044459.10	CNTLN	9_17447446_C_T_b37	rs2593411	2.1e-17	-0.43	Esophagus - Muscularis
ENSG00000044459.10	CNTLN	9_17265852_T_A_b37	rs62252889	2.2e-17	0.75	Pancreas
ENSG00000044459.10	CNTLN	9_17370778_A_G_b37	rs13285577	2.2e-17	0.76	Pancreas
ENSG00000044459.10	CNTLN	9_17367616_T_G_b37	rs1583988	2.2e-17	-0.43	Esophagus - Muscularis
ENSG00000044459.10	CNTLN	9_17367617_C_T_b37	rs1583989	2.2e-17	-0.43	Esophagus - Muscularis
ENSG00000044459.10	CNTLN	9_17366932_C_G_b37	rs2099858	2.2e-17	-0.43	Esophagus - Muscularis
ENSG00000044459.10	CNTLN	9_17367368_T_C_b37	rs1583987	2.2e-17	-0.43	Esophagus - Muscularis
ENSG00000044459.10	CNTLN	9_17303467_A_T_b37	rs62558357	2.2e-17	0.43	Nerve - Tibial
ENSG00000044459.10	CNTLN	9_17371690_C_T_b37	rs1596193	2.2e-17	-0.63	Pancreas
ENSG00000044459.10	CNTLN	9_17331927_G_A_b37	rs3780258	2.2e-17	-0.43	Esophagus - Muscularis
ENSG00000044459.10	CNTLN	9_17353918_A_G_b37	rs7868684	2.3e-17	-0.43	Esophagus - Muscularis
ENSG00000044459.10	CNTLN	9_17353987_A_G_b37	rs7868700	2.3e-17	-0.43	Esophagus - Muscularis
ENSG00000044459.10	CNTLN	9_17354045_C_A_b37	rs7871926	2.3e-17	-0.43	Esophagus - Muscularis
ENSG00000044459.10	CNTLN	9_17354520_T_C_b37	rs7858760	2.3e-17	-0.43	Esophagus - Muscularis
ENSG00000044459.10	CNTLN	9_17354527_T_C_b37	rs7858762	2.3e-17	-0.43	Esophagus - Muscularis
ENSG00000044459.10	CNTLN	9_17354758_C_T_b37	rs7872831	2.3e-17	-0.43	Esophagus - Muscularis
ENSG00000044459.10	CNTLN	9_17355782_G_A_b37	rs4961541	2.3e-17	-0.43	Esophagus - Muscularis
ENSG00000044459.10	CNTLN	9_17356411_A_C_b37	rs10810773	2.3e-17	-0.43	Esophagus - Muscularis
ENSG00000044459.10	CNTLN	9_17356475_A_G_b37	rs10756874	2.3e-17	-0.43	Esophagus - Muscularis
ENSG00000044459.10	CNTLN	9_17360179_C_G_b37	rs10810777	2.3e-17	-0.43	Esophagus - Muscularis
ENSG00000044459.10	CNTLN	9_17363218_A_C_b37	rs6475145	2.3e-17	-0.43	Esophagus - Muscularis
ENSG00000044459.10	CNTLN	9_17274815_C_G_b37	rs10962993	2.3e-17	0.32	Thyroid
ENSG00000044459.10	CNTLN	9_17334075_T_G_b37	rs10963040	2.4e-17	0.73	Pancreas
ENSG00000044459.10	CNTLN	9_17321313_C_G_b37	rs10963031	2.4e-17	0.73	Pancreas
ENSG00000044459.10	CNTLN	9_17321712_T_C_b37	rs10810755	2.4e-17	0.73	Pancreas
ENSG00000044459.10	CNTLN	9_17453200_G_A_b37	rs2584540	2.4e-17	-0.39	Nerve - Tibial
ENSG00000044459.10	CNTLN	9_17367399_T_TAAAA_b37	rs398073456	2.5e-17	-0.42	Esophagus - Muscularis
ENSG00000044459.10	CNTLN	9_17369684_A_G_b37	rs4961553	2.5e-17	-0.42	Esophagus - Muscularis
ENSG00000044459.10	CNTLN	9_17368900_A_G_b37	rs4961552	2.5e-17	-0.42	Esophagus - Muscularis
ENSG00000044459.10	CNTLN	9_17364950_G_A_b37	rs10738476	2.5e-17	-0.43	Esophagus - Muscularis
ENSG00000044459.10	CNTLN	9_17425725_T_C_b37	rs1348277	2.5e-17	0.35	Nerve - Tibial
ENSG00000044459.10	CNTLN	9_17378776_G_A_b37	rs10963072	2.5e-17	0.83	Pancreas
ENSG00000044459.10	CNTLN	9_17435228_G_C_b37	rs2593415	2.6e-17	-0.42	Esophagus - Muscularis
ENSG00000044459.10	CNTLN	9_17327271_G_A_b37	rs4246135	2.6e-17	-0.34	Cells - Transformed fibroblasts
ENSG00000044459.10	CNTLN	9_17364507_T_C_b37	rs7848980	2.6e-17	-0.43	Esophagus - Muscularis
ENSG00000044459.10	CNTLN	9_17266095_C_G_b37	rs11523726	2.6e-17	0.76	Pancreas
ENSG00000044459.10	CNTLN	9_17274815_C_G_b37	rs10962993	2.7e-17	0.72	Pancreas
ENSG00000044459.10	CNTLN	9_17348688_G_C_b37	rs10810769	2.7e-17	-0.43	Esophagus - Muscularis
ENSG00000044459.10	CNTLN	9_17348689_G_C_b37	rs10810770	2.7e-17	-0.43	Esophagus - Muscularis
ENSG00000044459.10	CNTLN	9_17252284_G_T_b37	rs10810740	2.9e-17	0.42	Esophagus - Muscularis
ENSG00000044459.10	CNTLN	9_17356925_T_C_b37	rs10810774	3e-17	-0.43	Esophagus - Muscularis
ENSG00000044459.10	CNTLN	9_17319339_T_C_b37	rs4272484	3e-17	-0.64	Pancreas
ENSG00000044459.10	CNTLN	9_17269629_T_C_b37	rs35998538	3.1e-17	0.75	Pancreas
ENSG00000044459.10	CNTLN	9_17350843_C_T_b37	rs10124487	3.1e-17	-0.41	Esophagus - Muscularis
ENSG00000044459.10	CNTLN	9_17391536_A_G_b37	rs1442523	3.2e-17	-0.62	Pancreas
ENSG00000044459.10	CNTLN	9_17406022_A_G_b37	rs2584547	3.2e-17	-0.61	Pancreas
ENSG00000044459.10	CNTLN	9_17364832_G_T_b37	rs10756876	3.2e-17	-0.42	Esophagus - Muscularis
ENSG00000044459.10	CNTLN	9_17357212_T_C_b37	rs4961542	3.3e-17	-0.43	Esophagus - Muscularis
ENSG00000044459.10	CNTLN	9_17255226_T_A_b37	rs10962949	3.4e-17	0.76	Pancreas
ENSG00000044459.10	CNTLN	9_17398056_A_G_b37	rs62559022	3.4e-17	0.42	Nerve - Tibial
ENSG00000044459.10	CNTLN	9_17333747_CAT_C_b37	rs3840727	3.4e-17	-0.63	Pancreas
ENSG00000044459.10	CNTLN	9_17362180_C_A_b37	rs1372702	3.4e-17	-0.43	Esophagus - Muscularis
ENSG00000044459.10	CNTLN	9_17365022_C_A_b37	rs10756877	3.4e-17	-0.43	Esophagus - Muscularis
ENSG00000044459.10	CNTLN	9_17344148_GTTTAT_G_b37	rs10531584	3.4e-17	-0.41	Esophagus - Muscularis
ENSG00000044459.10	CNTLN	9_17268228_T_C_b37	rs10756858	3.5e-17	0.63	Pancreas
ENSG00000044459.10	CNTLN	9_17400370_C_G_b37	rs10810786	3.5e-17	-0.63	Pancreas
ENSG00000044459.10	CNTLN	9_17402272_G_A_b37	rs1889114	3.5e-17	-0.63	Pancreas
ENSG00000044459.10	CNTLN	9_17403132_A_G_b37	rs12339564	3.5e-17	-0.63	Pancreas
ENSG00000044459.10	CNTLN	9_17318647_C_T_b37	rs12337171	3.7e-17	-0.63	Pancreas
ENSG00000044459.10	CNTLN	9_17261209_G_A_b37	rs1591138	3.7e-17	0.42	Esophagus - Muscularis
ENSG00000044459.10	CNTLN	9_17255537_C_G_b37	rs11789418	3.8e-17	0.75	Pancreas
ENSG00000044459.10	CNTLN	9_17318647_C_T_b37	rs12337171	3.8e-17	-0.41	Esophagus - Muscularis
ENSG00000044459.10	CNTLN	9_17356550_G_A_b37	rs10756875	3.8e-17	-0.43	Esophagus - Muscularis
ENSG00000044459.10	CNTLN	9_17278584_A_G_b37	rs2779773	3.8e-17	0.41	Esophagus - Muscularis
ENSG00000044459.10	CNTLN	9_17451083_G_A_b37	rs2584538	3.8e-17	-0.38	Nerve - Tibial
ENSG00000044459.10	CNTLN	9_17350843_C_T_b37	rs10124487	4e-17	-0.63	Pancreas
ENSG00000044459.10	CNTLN	9_17328201_G_C_b37	rs10810759	4e-17	0.76	Pancreas
ENSG00000044459.10	CNTLN	9_17334135_G_A_b37	rs10963041	4e-17	0.76	Pancreas
ENSG00000044459.10	CNTLN	9_17365276_C_T_b37	rs62558966	4e-17	0.76	Pancreas
ENSG00000044459.10	CNTLN	9_17335706_T_C_b37	rs10810762	4e-17	0.76	Pancreas
ENSG00000044459.10	CNTLN	9_17352810_T_G_b37	rs12376973	4e-17	0.76	Pancreas
ENSG00000044459.10	CNTLN	9_17384923_A_G_b37	rs10121841	4e-17	-0.62	Pancreas
ENSG00000044459.10	CNTLN	9_17370081_G_C_b37	rs12553516	4e-17	0.38	Nerve - Tibial
ENSG00000044459.10	CNTLN	9_17295260_A_C_b37	rs4409489	4.1e-17	0.41	Esophagus - Muscularis
ENSG00000044459.10	CNTLN	9_17364272_T_C_b37	rs35601090	4.2e-17	0.77	Pancreas
ENSG00000044459.10	CNTLN	9_17372689_C_G_b37	rs10963069	4.2e-17	0.75	Pancreas
ENSG00000044459.10	CNTLN	9_17391822_G_C_b37	rs1442524	4.2e-17	-0.62	Pancreas
ENSG00000044459.10	CNTLN	9_17325281_CAT_C_b37	rs796494963	4.5e-17	0.48	Esophagus - Muscularis
ENSG00000044459.10	CNTLN	9_17357265_G_GT_b37	rs397750534	4.5e-17	-0.43	Esophagus - Muscularis
ENSG00000044459.10	CNTLN	9_17282681_C_G_b37	rs593614	4.5e-17	0.41	Esophagus - Muscularis
ENSG00000044459.10	CNTLN	9_17292890_A_G_b37	rs670058	4.5e-17	0.41	Esophagus - Muscularis
ENSG00000044459.10	CNTLN	9_17384459_A_G_b37	rs10810781	4.7e-17	-0.63	Pancreas
ENSG00000044459.10	CNTLN	9_17247384_A_G_b37	rs2151290	4.7e-17	0.63	Pancreas
ENSG00000044459.10	CNTLN	9_17255537_C_G_b37	rs11789418	4.7e-17	0.38	Nerve - Tibial
ENSG00000044459.10	CNTLN	9_17231465_C_T_b37	rs10756855	5.2e-17	0.42	Esophagus - Muscularis
ENSG00000044459.10	CNTLN	9_17365613_T_C_b37	rs2225598	5.3e-17	-0.43	Esophagus - Muscularis
ENSG00000044459.10	CNTLN	9_17346898_T_G_b37	rs13301284	5.3e-17	0.75	Pancreas
ENSG00000044459.10	CNTLN	9_17358903_G_A_b37	rs11791000	5.3e-17	0.75	Pancreas
ENSG00000044459.10	CNTLN	9_17365351_T_C_b37	rs10123745	5.3e-17	-0.42	Esophagus - Muscularis
ENSG00000044459.10	CNTLN	9_17265321_G_A_b37	rs11560448	5.4e-17	0.63	Pancreas
ENSG00000044459.10	CNTLN	9_17383073_C_G_b37	rs10114662	5.4e-17	-0.64	Pancreas
ENSG00000044459.10	CNTLN	9_17418425_T_G_b37	rs1442516	5.6e-17	0.44	Esophagus - Muscularis
ENSG00000044459.10	CNTLN	9_17277778_T_A_b37	rs4375098	5.7e-17	0.31	Thyroid
ENSG00000044459.10	CNTLN	9_17385296_C_G_b37	rs62558996	5.7e-17	0.42	Nerve - Tibial
ENSG00000044459.10	CNTLN	9_17364157_A_C_b37	rs7862069	5.7e-17	-0.43	Esophagus - Muscularis
ENSG00000044459.10	CNTLN	9_17356999_C_T_b37	rs10810775	5.8e-17	-0.43	Esophagus - Muscularis
ENSG00000044459.10	CNTLN	9_17284013_TTTTG_T_b37	rs373542765	5.8e-17	0.72	Pancreas
ENSG00000044459.10	CNTLN	9_17262062_G_A_b37	rs10962958	5.9e-17	0.74	Pancreas
ENSG00000044459.10	CNTLN	9_17392921_G_A_b37	rs4961439	5.9e-17	-0.62	Pancreas
ENSG00000044459.10	CNTLN	9_17261350_T_G_b37	rs1582031	5.9e-17	0.42	Esophagus - Muscularis
ENSG00000044459.10	CNTLN	9_17343840_C_G_b37	rs12379538	6.2e-17	0.75	Pancreas
ENSG00000044459.10	CNTLN	9_17284111_A_C_b37	rs4574939	6.2e-17	0.71	Pancreas
ENSG00000044459.10	CNTLN	9_17385348_C_T_b37	rs4961555	6.3e-17	-0.62	Pancreas
ENSG00000044459.10	CNTLN	9_17354396_T_C_b37	rs7858530	6.3e-17	-0.64	Pancreas
ENSG00000044459.10	CNTLN	9_17303255_C_T_b37	rs17755748	6.4e-17	0.75	Pancreas
ENSG00000044459.10	CNTLN	9_17303726_A_T_b37	rs10963019	6.4e-17	0.75	Pancreas
ENSG00000044459.10	CNTLN	9_17303067_T_C_b37	rs1953106	6.4e-17	0.75	Pancreas
ENSG00000044459.10	CNTLN	9_17311944_T_G_b37	rs10963025	6.4e-17	0.75	Pancreas
ENSG00000044459.10	CNTLN	9_17281923_G_A_b37	rs10963000	6.5e-17	0.71	Pancreas
ENSG00000044459.10	CNTLN	9_17282186_G_C_b37	rs10963001	6.5e-17	0.71	Pancreas
ENSG00000044459.10	CNTLN	9_17283020_A_G_b37	rs7041744	6.5e-17	0.71	Pancreas
ENSG00000044459.10	CNTLN	9_17283550_T_G_b37	rs10810745	6.5e-17	0.71	Pancreas
ENSG00000044459.10	CNTLN	9_17283597_C_G_b37	rs10810746	6.5e-17	0.71	Pancreas
ENSG00000044459.10	CNTLN	9_17283690_T_C_b37	rs10963005	6.5e-17	0.71	Pancreas
ENSG00000044459.10	CNTLN	9_17284073_A_G_b37	rs4626705	6.5e-17	0.71	Pancreas
ENSG00000044459.10	CNTLN	9_17260010_C_T_b37	rs10962955	6.5e-17	0.66	Pancreas
ENSG00000044459.10	CNTLN	9_17405331_A_G_b37	rs58474114	6.6e-17	0.36	Nerve - Tibial
ENSG00000044459.10	CNTLN	9_17354396_T_C_b37	rs7858530	6.6e-17	-0.43	Esophagus - Muscularis
ENSG00000044459.10	CNTLN	9_17321039_T_G_b37	rs10963030	6.7e-17	0.73	Pancreas
ENSG00000044459.10	CNTLN	9_17363286_A_G_b37	rs7030452	6.7e-17	-0.43	Esophagus - Muscularis
ENSG00000044459.10	CNTLN	9_17330558_T_A_b37	rs3765040	6.7e-17	-0.43	Esophagus - Muscularis
ENSG00000044459.10	CNTLN	9_17358463_A_G_b37	rs10963065	6.8e-17	0.76	Pancreas
ENSG00000044459.10	CNTLN	9_17390339_C_T_b37	rs10116140	6.9e-17	-0.62	Pancreas
ENSG00000044459.10	CNTLN	9_17259049_C_G_b37	rs113101695	7e-17	0.74	Pancreas
ENSG00000044459.10	CNTLN	9_17454685_C_T_b37	rs753393	7.3e-17	-0.42	Esophagus - Muscularis
ENSG00000044459.10	CNTLN	9_17290970_T_C_b37	rs605469	7.3e-17	0.41	Esophagus - Muscularis
ENSG00000044459.10	CNTLN	9_17310822_T_C_b37	rs13287407	7.3e-17	0.75	Pancreas
ENSG00000044459.10	CNTLN	9_17373948_T_C_b37	rs10114083	7.4e-17	-0.42	Esophagus - Muscularis
ENSG00000044459.10	CNTLN	9_17259049_C_G_b37	rs113101695	7.7e-17	0.31	Adipose - Visceral (Omentum)
ENSG00000044459.10	CNTLN	9_17426808_C_G_b37	rs2584554	7.7e-17	-0.25	Adipose - Subcutaneous
ENSG00000044459.10	CNTLN	9_17265852_T_A_b37	rs62252889	7.7e-17	0.31	Adipose - Visceral (Omentum)
ENSG00000044459.10	CNTLN	9_17279051_GAAC_G_b37	rs367907570	7.8e-17	0.74	Pancreas
ENSG00000044459.10	CNTLN	9_17342517_A_G_b37	rs10756869	7.8e-17	-0.41	Esophagus - Muscularis
ENSG00000044459.10	CNTLN	9_17294425_T_TC_b37	rs398113305	7.9e-17	0.41	Esophagus - Muscularis
ENSG00000044459.10	CNTLN	9_17293779_G_A_b37	rs645117	8.1e-17	0.4	Esophagus - Muscularis
ENSG00000044459.10	CNTLN	9_17362540_G_C_b37	rs12377334	8.3e-17	0.75	Pancreas
ENSG00000044459.10	CNTLN	9_17409888_C_G_b37	rs2780209	8.5e-17	-0.43	Esophagus - Muscularis
ENSG00000044459.10	CNTLN	9_17262898_C_G_b37	rs13292380	8.5e-17	0.75	Pancreas
ENSG00000044459.10	CNTLN	9_17447446_C_T_b37	rs2593411	8.5e-17	-0.35	Nerve - Tibial
ENSG00000044459.10	CNTLN	9_17366932_C_G_b37	rs2099858	8.8e-17	-0.65	Pancreas
ENSG00000044459.10	CNTLN	9_17454820_G_A_b37	rs1372703	8.9e-17	-0.74	Pancreas
ENSG00000044459.10	CNTLN	9_17326202_C_A_b37	rs11789741	8.9e-17	0.75	Pancreas
ENSG00000044459.10	CNTLN	9_17314292_A_T_b37	rs10810751	9e-17	-0.42	Esophagus - Muscularis
ENSG00000044459.10	CNTLN	9_17281961_C_CT_b37	rs397893175	9.1e-17	0.72	Pancreas
ENSG00000044459.10	CNTLN	9_17336882_C_T_b37	rs7044462	9.1e-17	-0.41	Esophagus - Muscularis
ENSG00000044459.10	CNTLN	9_17309336_T_C_b37	rs10756860	9.2e-17	-0.63	Pancreas
ENSG00000044459.10	CNTLN	9_17331647_G_A_b37	rs10963039	9.3e-17	0.76	Pancreas
ENSG00000044459.10	CNTLN	9_17265490_C_G_b37	rs13288652	9.3e-17	0.73	Pancreas
ENSG00000044459.10	CNTLN	9_17274331_T_A_b37	rs13290659	9.4e-17	0.31	Thyroid
ENSG00000044459.10	CNTLN	9_17379340_T_C_b37	rs36057268	9.7e-17	-0.65	Pancreas
ENSG00000044459.10	CNTLN	9_17328928_C_T_b37	rs12553068	9.8e-17	0.38	Nerve - Tibial
ENSG00000044459.10	CNTLN	9_17267413_G_T_b37	rs34768018	1e-16	0.31	Adipose - Visceral (Omentum)
ENSG00000044459.10	CNTLN	9_17364832_G_T_b37	rs10756876	1e-16	-0.63	Pancreas
ENSG00000044459.10	CNTLN	9_17324158_G_C_b37	rs17829280	1.1e-16	0.74	Pancreas
ENSG00000044459.10	CNTLN	9_17333543_A_G_b37	rs3808784	1.1e-16	-0.43	Esophagus - Muscularis
ENSG00000044459.10	CNTLN	9_17268590_C_T_b37	rs62558320	1.1e-16	0.31	Adipose - Visceral (Omentum)
ENSG00000044459.10	CNTLN	9_17279838_T_C_b37	rs1759441	1.1e-16	0.4	Esophagus - Muscularis
ENSG00000044459.10	CNTLN	9_17335585_A_G_b37	rs4246136	1.1e-16	-0.42	Esophagus - Muscularis
ENSG00000044459.10	CNTLN	9_17346156_T_C_b37	rs10116428	1.1e-16	-0.42	Esophagus - Muscularis
ENSG00000044459.10	CNTLN	9_17344148_GTTTAT_G_b37	rs10531584	1.1e-16	-0.63	Pancreas
ENSG00000044459.10	CNTLN	9_17440987_A_G_b37	rs1442531	1.1e-16	-0.29	Cells - Transformed fibroblasts
ENSG00000044459.10	CNTLN	9_17336338_C_G_b37	rs4961539	1.2e-16	-0.41	Esophagus - Muscularis
ENSG00000044459.10	CNTLN	9_17283132_G_A_b37	rs7042230	1.2e-16	0.73	Pancreas
ENSG00000044459.10	CNTLN	9_17291263_A_G_b37	rs34256131	1.2e-16	0.73	Pancreas
ENSG00000044459.10	CNTLN	9_17291973_C_T_b37	rs12377081	1.2e-16	0.73	Pancreas
ENSG00000044459.10	CNTLN	9_17296529_C_T_b37	rs10963015	1.2e-16	0.73	Pancreas
ENSG00000044459.10	CNTLN	9_17297694_C_T_b37	rs17828423	1.2e-16	0.73	Pancreas
ENSG00000044459.10	CNTLN	9_17334526_G_A_b37	rs9298775	1.2e-16	-0.42	Esophagus - Muscularis
ENSG00000044459.10	CNTLN	9_17270025_C_G_b37	rs13286311	1.2e-16	0.31	Adipose - Visceral (Omentum)
ENSG00000044459.10	CNTLN	9_17414823_C_A_b37	rs2593387	1.2e-16	-0.64	Pancreas
ENSG00000044459.10	CNTLN	9_17255507_T_C_b37	rs11791463	1.2e-16	0.38	Nerve - Tibial
ENSG00000044459.10	CNTLN	9_17345817_T_C_b37	rs4961540	1.2e-16	-0.42	Esophagus - Muscularis
ENSG00000044459.10	CNTLN	9_17260010_C_T_b37	rs10962955	1.3e-16	0.43	Esophagus - Muscularis
ENSG00000044459.10	CNTLN	9_17280827_C_G_b37	rs870271	1.3e-16	0.4	Esophagus - Muscularis
ENSG00000044459.10	CNTLN	9_17413208_C_T_b37	rs34105027	1.3e-16	-0.64	Pancreas
ENSG00000044459.10	CNTLN	9_17336360_G_A_b37	rs10810763	1.3e-16	-0.42	Esophagus - Muscularis
ENSG00000044459.10	CNTLN	9_17319339_T_C_b37	rs4272484	1.3e-16	-0.41	Esophagus - Muscularis
ENSG00000044459.10	CNTLN	9_17341670_A_G_b37	rs10810765	1.3e-16	0.63	Pancreas
ENSG00000044459.10	CNTLN	9_17275039_C_G_b37	rs10962994	1.3e-16	0.71	Pancreas
ENSG00000044459.10	CNTLN	9_17362508_AT_A_b37	rs869075452	1.3e-16	-0.42	Esophagus - Muscularis
ENSG00000044459.10	CNTLN	9_17335125_T_C_b37	rs10123715	1.3e-16	-0.42	Esophagus - Muscularis
ENSG00000044459.10	CNTLN	9_17313678_T_A_b37	rs7864650	1.3e-16	-0.63	Pancreas
ENSG00000044459.10	CNTLN	9_17313926_C_T_b37	rs10963026	1.3e-16	-0.41	Esophagus - Muscularis
ENSG00000044459.10	CNTLN	9_17276104_T_C_b37	rs2027014	1.4e-16	0.31	Thyroid
ENSG00000044459.10	CNTLN	9_17324268_C_T_b37	rs10810756	1.4e-16	-0.41	Esophagus - Muscularis
ENSG00000044459.10	CNTLN	9_17262160_T_C_b37	rs10962959	1.4e-16	0.31	Adipose - Visceral (Omentum)
ENSG00000044459.10	CNTLN	9_17367325_C_A_b37	rs3861711	1.4e-16	-0.41	Esophagus - Muscularis
ENSG00000044459.10	CNTLN	9_17390170_C_T_b37	rs10116093	1.4e-16	-0.63	Pancreas
ENSG00000044459.10	CNTLN	9_17310385_G_C_b37	rs10963022	1.4e-16	0.76	Pancreas
ENSG00000044459.10	CNTLN	9_17255507_T_C_b37	rs11791463	1.5e-16	0.74	Pancreas
ENSG00000044459.10	CNTLN	9_17279064_C_T_b37	rs1759613	1.5e-16	0.4	Esophagus - Muscularis
ENSG00000044459.10	CNTLN	9_17266095_C_G_b37	rs11523726	1.5e-16	0.31	Adipose - Visceral (Omentum)
ENSG00000044459.10	CNTLN	9_17353689_T_C_b37	rs7854818	1.5e-16	-0.42	Esophagus - Muscularis
ENSG00000044459.10	CNTLN	9_17425725_T_C_b37	rs1348277	1.5e-16	0.64	Pancreas
ENSG00000044459.10	CNTLN	9_17278726_A_G_b37	rs13292550	1.5e-16	0.74	Pancreas
ENSG00000044459.10	CNTLN	9_17364950_G_A_b37	rs10738476	1.5e-16	-0.64	Pancreas
ENSG00000044459.10	CNTLN	9_17283197_G_A_b37	rs595894	1.6e-16	0.4	Esophagus - Muscularis
ENSG00000044459.10	CNTLN	9_17346147_A_G_b37	rs10119297	1.6e-16	-0.42	Esophagus - Muscularis
ENSG00000044459.10	CNTLN	9_17313996_T_G_b37	rs10963027	1.6e-16	-0.42	Esophagus - Muscularis
ENSG00000044459.10	CNTLN	9_17284805_T_C_b37	rs2095156	1.7e-16	0.74	Pancreas
ENSG00000044459.10	CNTLN	9_17335480_A_C_b37	rs10481559	1.7e-16	-0.42	Esophagus - Muscularis
ENSG00000044459.10	CNTLN	9_17426733_C_T_b37	rs2584553	1.7e-16	-0.24	Adipose - Subcutaneous
ENSG00000044459.10	CNTLN	9_17334801_G_A_b37	rs10046851	1.7e-16	-0.42	Esophagus - Muscularis
ENSG00000044459.10	CNTLN	9_17313614_A_C_b37	rs7849084	1.7e-16	-0.42	Esophagus - Muscularis
ENSG00000044459.10	CNTLN	9_17313619_A_G_b37	rs7849085	1.7e-16	-0.42	Esophagus - Muscularis
ENSG00000044459.10	CNTLN	9_17413208_C_T_b37	rs34105027	1.8e-16	-0.25	Adipose - Subcutaneous
ENSG00000044459.10	CNTLN	9_17273628_C_CAG_b37	rs3840729	1.8e-16	0.3	Adipose - Visceral (Omentum)
ENSG00000044459.10	CNTLN	9_17351711_A_G_b37	rs6475143	1.8e-16	-0.64	Pancreas
ENSG00000044459.10	CNTLN	9_17225378_T_A_b37	rs10962916	1.8e-16	0.41	Nerve - Tibial
ENSG00000044459.10	CNTLN	9_17281278_A_T_b37	rs1889088	1.8e-16	0.45	Esophagus - Muscularis
ENSG00000044459.10	CNTLN	9_17347872_C_T_b37	rs7865766	1.8e-16	-0.62	Pancreas
ENSG00000044459.10	CNTLN	9_17284111_A_C_b37	rs4574939	1.8e-16	0.29	Adipose - Visceral (Omentum)
ENSG00000044459.10	CNTLN	9_17276104_T_C_b37	rs2027014	1.8e-16	0.71	Pancreas
ENSG00000044459.10	CNTLN	9_17284111_A_C_b37	rs4574939	1.9e-16	0.31	Thyroid
ENSG00000044459.10	CNTLN	9_17279838_T_C_b37	rs1759441	1.9e-16	0.61	Pancreas
ENSG00000044459.10	CNTLN	9_17401812_TTAA_T_b37	rs34064391	1.9e-16	-0.63	Pancreas
ENSG00000044459.10	CNTLN	9_17272312_A_G_b37	rs12376505	1.9e-16	0.31	Adipose - Visceral (Omentum)
ENSG00000044459.10	CNTLN	9_17356925_T_C_b37	rs10810774	1.9e-16	-0.63	Pancreas
ENSG00000044459.10	CNTLN	9_17299342_T_C_b37	rs10963017	1.9e-16	0.73	Pancreas
ENSG00000044459.10	CNTLN	9_17383073_C_G_b37	rs10114662	1.9e-16	-0.41	Esophagus - Muscularis
ENSG00000044459.10	CNTLN	9_17349864_C_T_b37	rs2044119	2e-16	-0.64	Pancreas
ENSG00000044459.10	CNTLN	9_17356550_G_A_b37	rs10756875	2e-16	-0.63	Pancreas
ENSG00000044459.10	CNTLN	9_17347722_T_C_b37	rs7851890	2e-16	-0.43	Esophagus - Muscularis
ENSG00000044459.10	CNTLN	9_17302919_T_A_b37	rs1759454	2e-16	0.41	Esophagus - Muscularis
ENSG00000044459.10	CNTLN	9_17314532_T_G_b37	rs10810752	2e-16	-0.42	Esophagus - Muscularis
ENSG00000044459.10	CNTLN	9_17352005_G_A_b37	rs6475144	2.1e-16	-0.64	Pancreas
ENSG00000044459.10	CNTLN	9_17242708_G_C_b37	rs10756856	2.1e-16	0.43	Esophagus - Muscularis
ENSG00000044459.10	CNTLN	9_17425664_C_G_b37	rs1348278	2.2e-16	0.29	Thyroid
ENSG00000044459.10	CNTLN	9_17242909_C_G_b37	rs11521161	2.3e-16	0.78	Pancreas
ENSG00000044459.10	CNTLN	9_17342517_A_G_b37	rs10756869	2.3e-16	-0.62	Pancreas
ENSG00000044459.10	CNTLN	9_17282659_G_A_b37	rs35968717	2.3e-16	0.45	Esophagus - Muscularis
ENSG00000044459.10	CNTLN	9_17346404_A_G_b37	rs10119370	2.3e-16	-0.64	Pancreas
ENSG00000044459.10	CNTLN	9_17349497_A_G_b37	rs10963057	2.3e-16	-0.64	Pancreas
ENSG00000044459.10	CNTLN	9_17350378_A_C_b37	rs6475141	2.3e-16	-0.64	Pancreas
ENSG00000044459.10	CNTLN	9_17350631_G_A_b37	rs6475142	2.3e-16	-0.64	Pancreas
ENSG00000044459.10	CNTLN	9_17284602_C_T_b37	rs2383013	2.3e-16	0.45	Esophagus - Muscularis
ENSG00000044459.10	CNTLN	9_17435383_G_A_b37	rs2593414	2.4e-16	-0.41	Esophagus - Muscularis
ENSG00000044459.10	CNTLN	9_17441027_A_G_b37	rs1442530	2.4e-16	-0.29	Cells - Transformed fibroblasts
ENSG00000044459.10	CNTLN	9_17386062_T_C_b37	rs12345267	2.4e-16	-0.62	Pancreas
ENSG00000044459.10	CNTLN	9_17362180_C_A_b37	rs1372702	2.4e-16	-0.63	Pancreas
ENSG00000044459.10	CNTLN	9_17365022_C_A_b37	rs10756877	2.4e-16	-0.63	Pancreas
ENSG00000044459.10	CNTLN	9_17367616_T_G_b37	rs1583988	2.4e-16	-0.63	Pancreas
ENSG00000044459.10	CNTLN	9_17367617_C_T_b37	rs1583989	2.4e-16	-0.63	Pancreas
ENSG00000044459.10	CNTLN	9_17367368_T_C_b37	rs1583987	2.4e-16	-0.63	Pancreas
ENSG00000044459.10	CNTLN	9_17362508_AT_A_b37	rs869075452	2.4e-16	-0.63	Pancreas
ENSG00000044459.10	CNTLN	9_17350983_C_G_b37	rs10124513	2.5e-16	-0.64	Pancreas
ENSG00000044459.10	CNTLN	9_17325851_G_T_b37	rs7848128	2.5e-16	0.29	Adipose - Visceral (Omentum)
ENSG00000044459.10	CNTLN	9_17372960_C_T_b37	rs7874453	2.5e-16	-0.63	Pancreas
ENSG00000044459.10	CNTLN	9_17274815_C_G_b37	rs10962993	2.6e-16	0.3	Adipose - Visceral (Omentum)
ENSG00000044459.10	CNTLN	9_17249911_T_A_b37	rs10962944	2.6e-16	0.3	Adipose - Visceral (Omentum)
ENSG00000044459.10	CNTLN	9_17273731_A_G_b37	rs3808795	2.6e-16	0.3	Adipose - Visceral (Omentum)
ENSG00000044459.10	CNTLN	9_17253518_C_T_b37	rs13290922	2.6e-16	0.41	Esophagus - Muscularis
ENSG00000044459.10	CNTLN	9_17265946_G_T_b37	rs13289755	2.6e-16	0.31	Adipose - Visceral (Omentum)
ENSG00000044459.10	CNTLN	9_17253882_C_T_b37	rs62558297	2.7e-16	0.79	Pancreas
ENSG00000044459.10	CNTLN	9_17341670_A_G_b37	rs10810765	2.7e-16	0.42	Esophagus - Muscularis
ENSG00000044459.10	CNTLN	9_17295223_T_C_b37	rs4424358	2.7e-16	0.39	Esophagus - Muscularis
ENSG00000044459.10	CNTLN	9_17349834_T_A_b37	rs2044120	2.7e-16	-0.64	Pancreas
ENSG00000044459.10	CNTLN	9_17247384_A_G_b37	rs2151290	2.8e-16	0.4	Esophagus - Muscularis
ENSG00000044459.10	CNTLN	9_17278607_C_T_b37	rs34502029	2.9e-16	0.31	Thyroid
ENSG00000044459.10	CNTLN	9_17364507_T_C_b37	rs7848980	2.9e-16	-0.63	Pancreas
ENSG00000044459.10	CNTLN	9_17301713_A_G_b37	rs10963018	3e-16	0.74	Pancreas
ENSG00000044459.10	CNTLN	9_17284641_TTTCTC_T_b37	rs369016594	3e-16	0.73	Pancreas
ENSG00000044459.10	CNTLN	9_17356475_A_G_b37	rs10756874	3.1e-16	-0.63	Pancreas
ENSG00000044459.10	CNTLN	9_17320822_G_C_b37	rs7028930	3.2e-16	-0.42	Esophagus - Muscularis
ENSG00000044459.10	CNTLN	9_17353689_T_C_b37	rs7854818	3.2e-16	-0.63	Pancreas
ENSG00000044459.10	CNTLN	9_17360179_C_G_b37	rs10810777	3.2e-16	-0.63	Pancreas
ENSG00000044459.10	CNTLN	9_17363218_A_C_b37	rs6475145	3.2e-16	-0.63	Pancreas
ENSG00000044459.10	CNTLN	9_17353918_A_G_b37	rs7868684	3.2e-16	-0.63	Pancreas
ENSG00000044459.10	CNTLN	9_17353987_A_G_b37	rs7868700	3.2e-16	-0.63	Pancreas
ENSG00000044459.10	CNTLN	9_17354045_C_A_b37	rs7871926	3.2e-16	-0.63	Pancreas
ENSG00000044459.10	CNTLN	9_17354520_T_C_b37	rs7858760	3.2e-16	-0.63	Pancreas
ENSG00000044459.10	CNTLN	9_17354527_T_C_b37	rs7858762	3.2e-16	-0.63	Pancreas
ENSG00000044459.10	CNTLN	9_17354758_C_T_b37	rs7872831	3.2e-16	-0.63	Pancreas
ENSG00000044459.10	CNTLN	9_17355782_G_A_b37	rs4961541	3.2e-16	-0.63	Pancreas
ENSG00000044459.10	CNTLN	9_17356411_A_C_b37	rs10810773	3.2e-16	-0.63	Pancreas
ENSG00000044459.10	CNTLN	9_17301710_C_A_b37	rs632265	3.3e-16	0.41	Esophagus - Muscularis
ENSG00000044459.10	CNTLN	9_17366568_A_T_b37	rs4961548	3.3e-16	-0.63	Pancreas
ENSG00000044459.10	CNTLN	9_17426186_G_A_b37	rs2780197	3.3e-16	-0.24	Adipose - Subcutaneous
ENSG00000044459.10	CNTLN	9_17339718_G_A_b37	rs10810764	3.3e-16	-0.24	Adipose - Subcutaneous
ENSG00000044459.10	CNTLN	9_17312829_G_A_b37	rs10810748	3.3e-16	-0.42	Esophagus - Muscularis
ENSG00000044459.10	CNTLN	9_17335125_T_C_b37	rs10123715	3.3e-16	-0.62	Pancreas
ENSG00000044459.10	CNTLN	9_17356999_C_T_b37	rs10810775	3.4e-16	-0.63	Pancreas
ENSG00000044459.10	CNTLN	9_17365613_T_C_b37	rs2225598	3.4e-16	-0.63	Pancreas
ENSG00000044459.10	CNTLN	9_17413173_T_A_b37	rs12555830	3.4e-16	0.68	Pancreas
ENSG00000044459.10	CNTLN	9_17278607_C_T_b37	rs34502029	3.4e-16	0.7	Pancreas
ENSG00000044459.10	CNTLN	9_17320792_T_C_b37	rs7044823	3.4e-16	-0.41	Esophagus - Muscularis
ENSG00000044459.10	CNTLN	9_17321670_C_T_b37	rs10125333	3.4e-16	-0.41	Esophagus - Muscularis
ENSG00000044459.10	CNTLN	9_17281278_A_T_b37	rs1889088	3.5e-16	0.31	Thyroid
ENSG00000044459.10	CNTLN	9_17284073_A_G_b37	rs4626705	3.5e-16	0.3	Thyroid
ENSG00000044459.10	CNTLN	9_17277778_T_A_b37	rs4375098	3.5e-16	0.7	Pancreas
ENSG00000044459.10	CNTLN	9_17262847_C_T_b37	rs13292365	3.6e-16	0.74	Pancreas
ENSG00000044459.10	CNTLN	9_17312886_A_T_b37	rs10810749	3.6e-16	-0.41	Esophagus - Muscularis
ENSG00000044459.10	CNTLN	9_17350814_G_A_b37	rs7028779	3.7e-16	-0.63	Pancreas
ENSG00000044459.10	CNTLN	9_17345817_T_C_b37	rs4961540	3.7e-16	-0.62	Pancreas
ENSG00000044459.10	CNTLN	9_17346147_A_G_b37	rs10119297	3.7e-16	-0.62	Pancreas
ENSG00000044459.10	CNTLN	9_17346156_T_C_b37	rs10116428	3.7e-16	-0.62	Pancreas
ENSG00000044459.10	CNTLN	9_17273926_C_G_b37	rs12379655	3.7e-16	0.29	Adipose - Visceral (Omentum)
ENSG00000044459.10	CNTLN	9_17319956_C_A_b37	rs9298772	3.8e-16	-0.41	Esophagus - Muscularis
ENSG00000044459.10	CNTLN	9_17320822_G_C_b37	rs7028930	3.8e-16	-0.62	Pancreas
ENSG00000044459.10	CNTLN	9_17246782_T_C_b37	rs10810739	3.9e-16	0.4	Esophagus - Muscularis
ENSG00000044459.10	CNTLN	9_17399095_T_G_b37	rs7041840	3.9e-16	-0.4	Esophagus - Muscularis
ENSG00000044459.10	CNTLN	9_17281923_G_A_b37	rs10963000	3.9e-16	0.3	Thyroid
ENSG00000044459.10	CNTLN	9_17283020_A_G_b37	rs7041744	3.9e-16	0.3	Thyroid
ENSG00000044459.10	CNTLN	9_17283597_C_G_b37	rs10810746	3.9e-16	0.3	Thyroid
ENSG00000044459.10	CNTLN	9_17283690_T_C_b37	rs10963005	3.9e-16	0.3	Thyroid
ENSG00000044459.10	CNTLN	9_17284602_C_T_b37	rs2383013	3.9e-16	0.3	Thyroid
ENSG00000044459.10	CNTLN	9_17267371_C_G_b37	rs7018705	4e-16	0.61	Pancreas
ENSG00000044459.10	CNTLN	9_17268584_T_C_b37	rs10962982	4e-16	0.61	Pancreas
ENSG00000044459.10	CNTLN	9_17273628_C_CAG_b37	rs3840729	4e-16	0.3	Thyroid
ENSG00000044459.10	CNTLN	9_17333453_G_A_b37	rs7031133	4.1e-16	-0.42	Esophagus - Muscularis
ENSG00000044459.10	CNTLN	9_17320881_A_G_b37	rs7028593	4.1e-16	-0.41	Esophagus - Muscularis
ENSG00000044459.10	CNTLN	9_17280827_C_G_b37	rs870271	4.1e-16	0.61	Pancreas
ENSG00000044459.10	CNTLN	9_17282681_C_G_b37	rs593614	4.1e-16	0.61	Pancreas
ENSG00000044459.10	CNTLN	9_17292890_A_G_b37	rs670058	4.1e-16	0.61	Pancreas
ENSG00000044459.10	CNTLN	9_17293779_G_A_b37	rs645117	4.1e-16	0.61	Pancreas
ENSG00000044459.10	CNTLN	9_17295260_A_C_b37	rs4409489	4.1e-16	0.61	Pancreas
ENSG00000044459.10	CNTLN	9_17279064_C_T_b37	rs1759613	4.1e-16	0.61	Pancreas
ENSG00000044459.10	CNTLN	9_17394136_C_T_b37	rs10283690	4.1e-16	-0.24	Adipose - Subcutaneous
ENSG00000044459.10	CNTLN	9_17318434_G_C_b37	rs12337154	4.2e-16	-0.41	Esophagus - Muscularis
ENSG00000044459.10	CNTLN	9_17363286_A_G_b37	rs7030452	4.2e-16	-0.63	Pancreas
ENSG00000044459.10	CNTLN	9_17425725_T_C_b37	rs1348277	4.2e-16	0.41	Esophagus - Muscularis
ENSG00000044459.10	CNTLN	9_17409709_C_CA_b37	rs397756102	4.2e-16	0.38	Nerve - Tibial
ENSG00000044459.10	CNTLN	9_17282186_G_C_b37	rs10963001	4.2e-16	0.3	Thyroid
ENSG00000044459.10	CNTLN	9_17321670_C_T_b37	rs10125333	4.3e-16	-0.62	Pancreas
ENSG00000044459.10	CNTLN	9_17283550_T_G_b37	rs10810745	4.3e-16	0.3	Thyroid
ENSG00000044459.10	CNTLN	9_17254734_A_ATTG_b37	rs367732860	4.3e-16	0.4	Esophagus - Muscularis
ENSG00000044459.10	CNTLN	9_17348688_G_C_b37	rs10810769	4.3e-16	-0.63	Pancreas
ENSG00000044459.10	CNTLN	9_17348689_G_C_b37	rs10810770	4.3e-16	-0.63	Pancreas
ENSG00000044459.10	CNTLN	9_17269629_T_C_b37	rs35998538	4.5e-16	0.31	Adipose - Visceral (Omentum)
ENSG00000044459.10	CNTLN	9_17373070_G_A_b37	rs7848397	4.5e-16	-0.63	Pancreas
ENSG00000044459.10	CNTLN	9_17274319_G_T_b37	rs2779775	4.6e-16	0.41	Esophagus - Muscularis
ENSG00000044459.10	CNTLN	9_17282659_G_A_b37	rs35968717	4.6e-16	0.7	Pancreas
ENSG00000044459.10	CNTLN	9_17284602_C_T_b37	rs2383013	4.6e-16	0.7	Pancreas
ENSG00000044459.10	CNTLN	9_17266340_G_T_b37	rs11523716	4.7e-16	0.73	Pancreas
ENSG00000044459.10	CNTLN	9_17334526_G_A_b37	rs9298775	4.7e-16	-0.62	Pancreas
ENSG00000044459.10	CNTLN	9_17334801_G_A_b37	rs10046851	4.7e-16	-0.62	Pancreas
ENSG00000044459.10	CNTLN	9_17319956_C_A_b37	rs9298772	4.7e-16	-0.62	Pancreas
ENSG00000044459.10	CNTLN	9_17320792_T_C_b37	rs7044823	4.7e-16	-0.62	Pancreas
ENSG00000044459.10	CNTLN	9_17335480_A_C_b37	rs10481559	4.7e-16	-0.62	Pancreas
ENSG00000044459.10	CNTLN	9_17335585_A_G_b37	rs4246136	4.7e-16	-0.62	Pancreas
ENSG00000044459.10	CNTLN	9_17336360_G_A_b37	rs10810763	4.7e-16	-0.62	Pancreas
ENSG00000044459.10	CNTLN	9_17274331_T_A_b37	rs13290659	4.8e-16	0.29	Adipose - Visceral (Omentum)
ENSG00000044459.10	CNTLN	9_17254620_A_T_b37	rs7046933	4.8e-16	0.4	Esophagus - Muscularis
ENSG00000044459.10	CNTLN	9_17392921_G_A_b37	rs4961439	4.8e-16	-0.24	Adipose - Subcutaneous
ENSG00000044459.10	CNTLN	9_17331361_A_AT_b37	rs397781541	4.9e-16	-0.43	Esophagus - Muscularis
ENSG00000044459.10	CNTLN	9_17274319_G_T_b37	rs2779775	5e-16	0.6	Pancreas
ENSG00000044459.10	CNTLN	9_17275314_T_C_b37	rs10810743	5.2e-16	0.72	Pancreas
ENSG00000044459.10	CNTLN	9_17394136_C_T_b37	rs10283690	5.2e-16	-0.61	Pancreas
ENSG00000044459.10	CNTLN	9_17321574_C_T_b37	rs9298774	5.2e-16	-0.4	Esophagus - Muscularis
ENSG00000044459.10	CNTLN	9_17276104_T_C_b37	rs2027014	5.3e-16	0.29	Adipose - Visceral (Omentum)
ENSG00000044459.10	CNTLN	9_17435929_G_A_b37	rs2593412	5.4e-16	-0.24	Adipose - Subcutaneous
ENSG00000044459.10	CNTLN	9_17435459_A_G_b37	rs2584535	5.4e-16	-0.24	Adipose - Subcutaneous
ENSG00000044459.10	CNTLN	9_17261765_A_G_b37	rs10962956	5.5e-16	0.31	Adipose - Visceral (Omentum)
ENSG00000044459.10	CNTLN	9_17273926_C_G_b37	rs12379655	5.5e-16	0.3	Thyroid
ENSG00000044459.10	CNTLN	9_17330558_T_A_b37	rs3765040	5.5e-16	-0.62	Pancreas
ENSG00000044459.10	CNTLN	9_17255442_C_A_b37	rs10962950	5.6e-16	0.4	Esophagus - Muscularis
ENSG00000044459.10	CNTLN	9_17320544_A_G_b37	rs10810754	5.6e-16	-0.61	Pancreas
ENSG00000044459.10	CNTLN	9_17413208_C_T_b37	rs34105027	5.6e-16	-0.42	Esophagus - Muscularis
ENSG00000044459.10	CNTLN	9_17401812_TTAA_T_b37	rs34064391	5.7e-16	-0.41	Esophagus - Muscularis
ENSG00000044459.10	CNTLN	9_17312793_A_C_b37	rs61565870	5.7e-16	0.75	Pancreas
ENSG00000044459.10	CNTLN	9_17241391_C_T_b37	rs10962931	5.7e-16	0.78	Pancreas
ENSG00000044459.10	CNTLN	9_17278607_C_T_b37	rs34502029	5.8e-16	0.45	Esophagus - Muscularis
ENSG00000044459.10	CNTLN	9_17358066_G_A_b37	rs4961544	5.9e-16	-0.42	Esophagus - Muscularis
ENSG00000044459.10	CNTLN	9_17281216_G_A_b37	rs10962996	5.9e-16	0.71	Pancreas
ENSG00000044459.10	CNTLN	9_17281497_C_T_b37	rs10962998	5.9e-16	0.71	Pancreas
ENSG00000044459.10	CNTLN	9_17281538_G_T_b37	rs10962999	5.9e-16	0.71	Pancreas
ENSG00000044459.10	CNTLN	9_17292845_AG_A_b37	rs35876302	5.9e-16	0.71	Pancreas
ENSG00000044459.10	CNTLN	9_17435228_G_C_b37	rs2593415	6.1e-16	-0.24	Adipose - Subcutaneous
ENSG00000044459.10	CNTLN	9_17284013_TTTTG_T_b37	rs373542765	6.2e-16	0.3	Thyroid
ENSG00000044459.10	CNTLN	9_17282659_G_A_b37	rs35968717	6.3e-16	0.3	Thyroid
ENSG00000044459.10	CNTLN	9_17309336_T_C_b37	rs10756860	6.3e-16	-0.24	Adipose - Subcutaneous
ENSG00000044459.10	CNTLN	9_17273175_G_GA_b37	rs397813880	6.3e-16	0.61	Pancreas
ENSG00000044459.10	CNTLN	9_17339879_C_T_b37	rs7854724	6.3e-16	-0.61	Pancreas
ENSG00000044459.10	CNTLN	9_17251386_G_A_b37	rs1576962	6.5e-16	0.41	Esophagus - Muscularis
ENSG00000044459.10	CNTLN	9_17299342_T_C_b37	rs10963017	6.6e-16	0.31	Adipose - Visceral (Omentum)
ENSG00000044459.10	CNTLN	9_17257324_A_G_b37	rs62558301	6.6e-16	0.73	Pancreas
ENSG00000044459.10	CNTLN	9_17277778_T_A_b37	rs4375098	6.6e-16	0.29	Adipose - Visceral (Omentum)
ENSG00000044459.10	CNTLN	9_17329964_A_G_b37	rs1442528	6.8e-16	0.29	Adipose - Visceral (Omentum)
ENSG00000044459.10	CNTLN	9_17321382_T_C_b37	rs9298773	7.1e-16	-0.61	Pancreas
ENSG00000044459.10	CNTLN	9_17368458_C_T_b37	rs4961437	7.1e-16	-0.61	Pancreas
ENSG00000044459.10	CNTLN	9_17336492_G_A_b37	rs10738474	7.1e-16	-0.61	Pancreas
ENSG00000044459.10	CNTLN	9_17391536_A_G_b37	rs1442523	7.3e-16	-0.24	Adipose - Subcutaneous
ENSG00000044459.10	CNTLN	9_17266147_C_CT_b37	rs397732161	7.4e-16	0.62	Pancreas
ENSG00000044459.10	CNTLN	9_17368900_A_G_b37	rs4961552	7.4e-16	-0.24	Adipose - Subcutaneous
ENSG00000044459.10	CNTLN	9_17346914_C_T_b37	rs6475139	7.5e-16	-0.4	Esophagus - Muscularis
ENSG00000044459.10	CNTLN	9_17318434_G_C_b37	rs12337154	7.5e-16	-0.62	Pancreas
ENSG00000044459.10	CNTLN	9_17263748_T_G_b37	rs145190003	7.7e-16	0.3	Adipose - Visceral (Omentum)
ENSG00000044459.10	CNTLN	9_17265490_C_G_b37	rs13288652	7.7e-16	0.44	Esophagus - Muscularis
ENSG00000044459.10	CNTLN	9_17265477_C_G_b37	rs13288642	7.9e-16	0.3	Adipose - Visceral (Omentum)
ENSG00000044459.10	CNTLN	9_17384923_A_G_b37	rs10121841	7.9e-16	-0.4	Esophagus - Muscularis
ENSG00000044459.10	CNTLN	9_17278584_A_G_b37	rs2779773	8e-16	0.6	Pancreas
ENSG00000044459.10	CNTLN	9_17348552_G_T_b37	rs7869727	8e-16	-0.65	Pancreas
ENSG00000044459.10	CNTLN	9_17366296_A_ATTG_b37	rs10686546	8e-16	-0.63	Pancreas
ENSG00000044459.10	CNTLN	9_17379615_C_A_b37	rs10963073	8.1e-16	0.31	Adipose - Visceral (Omentum)
ENSG00000044459.10	CNTLN	9_17273878_A_G_b37	rs12376938	8.1e-16	0.3	Adipose - Visceral (Omentum)
ENSG00000044459.10	CNTLN	9_17368458_C_T_b37	rs4961437	8.1e-16	-0.4	Esophagus - Muscularis
ENSG00000044459.10	CNTLN	9_17390339_C_T_b37	rs10116140	8.2e-16	-0.24	Adipose - Subcutaneous
ENSG00000044459.10	CNTLN	9_17413137_G_GATT_b37	rs141477261	8.2e-16	-0.62	Pancreas
ENSG00000044459.10	CNTLN	9_17413210_CA_C_b37	rs34931239	8.2e-16	-0.62	Pancreas
ENSG00000044459.10	CNTLN	9_17276823_G_A_b37	rs11795325	8.3e-16	0.7	Pancreas
ENSG00000044459.10	CNTLN	9_17275039_C_G_b37	rs10962994	8.4e-16	0.29	Adipose - Visceral (Omentum)
ENSG00000044459.10	CNTLN	9_17414823_C_A_b37	rs2593387	8.6e-16	-0.42	Esophagus - Muscularis
ENSG00000044459.10	CNTLN	9_17261765_A_G_b37	rs10962956	8.6e-16	0.73	Pancreas
ENSG00000044459.10	CNTLN	9_17255537_C_G_b37	rs11789418	8.7e-16	0.3	Adipose - Visceral (Omentum)
ENSG00000044459.10	CNTLN	9_17313614_A_C_b37	rs7849084	8.8e-16	-0.62	Pancreas
ENSG00000044459.10	CNTLN	9_17313619_A_G_b37	rs7849085	8.8e-16	-0.62	Pancreas
ENSG00000044459.10	CNTLN	9_17340377_A_G_b37	rs3824392	8.9e-16	-0.61	Pancreas
ENSG00000044459.10	CNTLN	9_17340383_G_A_b37	rs3824391	8.9e-16	-0.61	Pancreas
ENSG00000044459.10	CNTLN	9_17407849_C_T_b37	rs2780212	8.9e-16	-0.62	Pancreas
ENSG00000044459.10	CNTLN	9_17338464_T_C_b37	rs7038197	9e-16	-0.43	Esophagus - Muscularis
ENSG00000044459.10	CNTLN	9_17347258_A_G_b37	rs7864919	9e-16	-0.61	Pancreas
ENSG00000044459.10	CNTLN	9_17276775_G_A_b37	rs2184063	9e-16	0.3	Thyroid
ENSG00000044459.10	CNTLN	9_17346914_C_T_b37	rs6475139	9.1e-16	-0.61	Pancreas
ENSG00000044459.10	CNTLN	9_17271479_GT_G_b37	rs397736711	9.3e-16	0.71	Pancreas
ENSG00000044459.10	CNTLN	9_17299120_A_G_b37	rs7026852	9.4e-16	0.71	Pancreas
ENSG00000044459.10	CNTLN	9_17365351_T_C_b37	rs10123745	9.5e-16	-0.24	Adipose - Subcutaneous
ENSG00000044459.10	CNTLN	9_17367399_T_TAAAA_b37	rs398073456	9.5e-16	-0.24	Adipose - Subcutaneous
ENSG00000044459.10	CNTLN	9_17369684_A_G_b37	rs4961553	9.5e-16	-0.24	Adipose - Subcutaneous
ENSG00000044459.10	CNTLN	9_17347258_A_G_b37	rs7864919	9.5e-16	-0.4	Esophagus - Muscularis
ENSG00000044459.10	CNTLN	9_17349531_A_T_b37	rs7873708	9.8e-16	-0.61	Pancreas
ENSG00000044459.10	CNTLN	9_17355890_GTC_G_b37	rs35917270	1e-15	-0.4	Esophagus - Muscularis
ENSG00000044459.10	CNTLN	9_17281278_A_T_b37	rs1889088	1e-15	0.69	Pancreas
ENSG00000044459.10	CNTLN	9_17253518_C_T_b37	rs13290922	1e-15	0.64	Pancreas
ENSG00000044459.10	CNTLN	9_17355890_GTC_G_b37	rs35917270	1e-15	-0.6	Pancreas
ENSG00000044459.10	CNTLN	9_17290970_T_C_b37	rs605469	1.1e-15	0.61	Pancreas
ENSG00000044459.10	CNTLN	9_17294425_T_TC_b37	rs398113305	1.1e-15	0.61	Pancreas
ENSG00000044459.10	CNTLN	9_17362540_G_C_b37	rs12377334	1.1e-15	0.46	Esophagus - Muscularis
ENSG00000044459.10	CNTLN	9_17281271_A_AT_b37	rs397743400	1.1e-15	0.3	Adipose - Visceral (Omentum)
ENSG00000044459.10	CNTLN	9_17328201_G_C_b37	rs10810759	1.1e-15	0.31	Adipose - Visceral (Omentum)
ENSG00000044459.10	CNTLN	9_17435383_G_A_b37	rs2593414	1.1e-15	-0.6	Pancreas
ENSG00000044459.10	CNTLN	9_17266340_G_T_b37	rs11523716	1.1e-15	0.3	Adipose - Visceral (Omentum)
ENSG00000044459.10	CNTLN	9_17379146_A_G_b37	rs1442533	1.1e-15	-0.63	Pancreas
ENSG00000044459.10	CNTLN	9_17266125_A_T_b37	rs7470216	1.1e-15	0.41	Esophagus - Muscularis
ENSG00000044459.10	CNTLN	9_17398404_G_A_b37	rs4961557	1.1e-15	-0.39	Esophagus - Muscularis
ENSG00000044459.10	CNTLN	9_17372689_C_G_b37	rs10963069	1.1e-15	0.45	Esophagus - Muscularis
ENSG00000044459.10	CNTLN	9_17275039_C_G_b37	rs10962994	1.1e-15	0.3	Thyroid
ENSG00000044459.10	CNTLN	9_17339793_G_A_b37	rs7854802	1.1e-15	-0.41	Esophagus - Muscularis
ENSG00000044459.10	CNTLN	9_17339839_T_C_b37	rs7870101	1.1e-15	-0.41	Esophagus - Muscularis
ENSG00000044459.10	CNTLN	9_17406022_A_G_b37	rs2584547	1.2e-15	-0.39	Esophagus - Muscularis
ENSG00000044459.10	CNTLN	9_17282659_G_A_b37	rs35968717	1.2e-15	0.29	Adipose - Visceral (Omentum)
ENSG00000044459.10	CNTLN	9_17283690_T_C_b37	rs10963005	1.2e-15	0.44	Esophagus - Muscularis
ENSG00000044459.10	CNTLN	9_17284073_A_G_b37	rs4626705	1.2e-15	0.44	Esophagus - Muscularis
ENSG00000044459.10	CNTLN	9_17281923_G_A_b37	rs10963000	1.2e-15	0.44	Esophagus - Muscularis
ENSG00000044459.10	CNTLN	9_17283020_A_G_b37	rs7041744	1.2e-15	0.44	Esophagus - Muscularis
ENSG00000044459.10	CNTLN	9_17283597_C_G_b37	rs10810746	1.2e-15	0.44	Esophagus - Muscularis
ENSG00000044459.10	CNTLN	9_17314292_A_T_b37	rs10810751	1.2e-15	-0.62	Pancreas
ENSG00000044459.10	CNTLN	9_17345387_A_ATAGT_b37	rs59007332	1.2e-15	0.28	Adipose - Visceral (Omentum)
ENSG00000044459.10	CNTLN	9_17255507_T_C_b37	rs11791463	1.2e-15	0.3	Adipose - Visceral (Omentum)
ENSG00000044459.10	CNTLN	9_17349531_A_T_b37	rs7873708	1.2e-15	-0.4	Esophagus - Muscularis
ENSG00000044459.10	CNTLN	9_17262847_C_T_b37	rs13292365	1.2e-15	0.3	Adipose - Visceral (Omentum)
ENSG00000044459.10	CNTLN	9_17284013_TTTTG_T_b37	rs373542765	1.2e-15	0.44	Esophagus - Muscularis
ENSG00000044459.10	CNTLN	9_17407849_C_T_b37	rs2780212	1.2e-15	-0.24	Adipose - Subcutaneous
ENSG00000044459.10	CNTLN	9_17434009_GA_G_b37	rs34625442	1.2e-15	-0.24	Adipose - Subcutaneous
ENSG00000044459.10	CNTLN	9_17284602_C_T_b37	rs2383013	1.3e-15	0.29	Adipose - Visceral (Omentum)
ENSG00000044459.10	CNTLN	9_17328674_A_G_b37	rs10810760	1.3e-15	0.28	Adipose - Visceral (Omentum)
ENSG00000044459.10	CNTLN	9_17339793_G_A_b37	rs7854802	1.3e-15	-0.61	Pancreas
ENSG00000044459.10	CNTLN	9_17339839_T_C_b37	rs7870101	1.3e-15	-0.61	Pancreas
ENSG00000044459.10	CNTLN	9_17276775_G_A_b37	rs2184063	1.3e-15	0.29	Adipose - Visceral (Omentum)
ENSG00000044459.10	CNTLN	9_17357212_T_C_b37	rs4961542	1.3e-15	-0.62	Pancreas
ENSG00000044459.10	CNTLN	9_17426186_G_A_b37	rs2780197	1.3e-15	-0.61	Pancreas
ENSG00000044459.10	CNTLN	9_17255226_T_A_b37	rs10962949	1.3e-15	0.29	Adipose - Visceral (Omentum)
ENSG00000044459.10	CNTLN	9_17353087_A_G_b37	rs10120757	1.3e-15	-0.62	Pancreas
ENSG00000044459.10	CNTLN	9_17353096_C_T_b37	rs10114688	1.3e-15	-0.62	Pancreas
ENSG00000044459.10	CNTLN	9_17254734_A_ATTG_b37	rs367732860	1.3e-15	0.63	Pancreas
ENSG00000044459.10	CNTLN	9_17312886_A_T_b37	rs10810749	1.3e-15	-0.24	Adipose - Subcutaneous
ENSG00000044459.10	CNTLN	9_17292165_T_C_b37	rs11515075	1.3e-15	0.71	Pancreas
ENSG00000044459.10	CNTLN	9_17385348_C_T_b37	rs4961555	1.3e-15	-0.39	Esophagus - Muscularis
ENSG00000044459.10	CNTLN	9_17435228_G_C_b37	rs2593415	1.4e-15	-0.61	Pancreas
ENSG00000044459.10	CNTLN	9_17447446_C_T_b37	rs2593411	1.4e-15	-0.52	Esophagus - Gastroesophageal Junction
ENSG00000044459.10	CNTLN	9_17283550_T_G_b37	rs10810745	1.4e-15	0.44	Esophagus - Muscularis
ENSG00000044459.10	CNTLN	9_17367325_C_A_b37	rs3861711	1.4e-15	-0.61	Pancreas
ENSG00000044459.10	CNTLN	9_17313996_T_G_b37	rs10963027	1.4e-15	-0.61	Pancreas
ENSG00000044459.10	CNTLN	9_17252006_C_A_b37	rs10962947	1.4e-15	0.62	Pancreas
ENSG00000044459.10	CNTLN	9_17269126_G_A_b37	rs59833414	1.4e-15	0.3	Adipose - Visceral (Omentum)
ENSG00000044459.10	CNTLN	9_17434009_GA_G_b37	rs34625442	1.4e-15	-0.61	Pancreas
ENSG00000044459.10	CNTLN	9_17384459_A_G_b37	rs10810781	1.4e-15	-0.39	Esophagus - Muscularis
ENSG00000044459.10	CNTLN	9_17440278_A_G_b37	rs2780199	1.4e-15	-0.24	Adipose - Subcutaneous
ENSG00000044459.10	CNTLN	9_17283197_G_A_b37	rs595894	1.5e-15	0.59	Pancreas
ENSG00000044459.10	CNTLN	9_17372209_G_C_b37	rs12379102	1.5e-15	-0.41	Esophagus - Muscularis
ENSG00000044459.10	CNTLN	9_17259794_A_G_b37	rs10962953	1.5e-15	0.4	Esophagus - Muscularis
ENSG00000044459.10	CNTLN	9_17371019_A_G_b37	rs13289968	1.5e-15	0.71	Pancreas
ENSG00000044459.10	CNTLN	9_17291057_A_G_b37	rs605916	1.5e-15	0.39	Esophagus - Muscularis
ENSG00000044459.10	CNTLN	9_17300060_G_A_b37	rs2779778	1.5e-15	0.39	Esophagus - Muscularis
ENSG00000044459.10	CNTLN	9_17300064_C_T_b37	rs2780206	1.5e-15	0.39	Esophagus - Muscularis
ENSG00000044459.10	CNTLN	9_17293779_G_A_b37	rs645117	1.5e-15	0.23	Adipose - Subcutaneous
ENSG00000044459.10	CNTLN	9_17321382_T_C_b37	rs9298773	1.6e-15	-0.39	Esophagus - Muscularis
ENSG00000044459.10	CNTLN	9_17430610_A_G_b37	rs1953105	1.6e-15	-0.24	Adipose - Subcutaneous
ENSG00000044459.10	CNTLN	9_17246782_T_C_b37	rs10810739	1.6e-15	0.61	Pancreas
ENSG00000044459.10	CNTLN	9_17392921_G_A_b37	rs4961439	1.7e-15	-0.39	Esophagus - Muscularis
ENSG00000044459.10	CNTLN	9_17313926_C_T_b37	rs10963026	1.7e-15	-0.23	Adipose - Subcutaneous
ENSG00000044459.10	CNTLN	9_17359939_C_T_b37	rs7037111	1.7e-15	-0.23	Adipose - Subcutaneous
ENSG00000044459.10	CNTLN	9_17385348_C_T_b37	rs4961555	1.7e-15	-0.23	Adipose - Subcutaneous
ENSG00000044459.10	CNTLN	9_17300093_G_A_b37	rs2779776	1.7e-15	0.39	Esophagus - Muscularis
ENSG00000044459.10	CNTLN	9_17353077_G_T_b37	rs10114730	1.8e-15	-0.62	Pancreas
ENSG00000044459.10	CNTLN	9_17282186_G_C_b37	rs10963001	1.8e-15	0.43	Esophagus - Muscularis
ENSG00000044459.10	CNTLN	9_17359162_G_A_b37	rs10810776	1.8e-15	0.45	Esophagus - Muscularis
ENSG00000044459.10	CNTLN	9_17290979_T_C_b37	rs605482	1.8e-15	0.39	Esophagus - Muscularis
ENSG00000044459.10	CNTLN	9_17257157_A_T_b37	rs62558300	1.8e-15	0.73	Pancreas
ENSG00000044459.10	CNTLN	9_17278584_A_G_b37	rs2779773	1.8e-15	0.23	Adipose - Subcutaneous
ENSG00000044459.10	CNTLN	9_17291778_T_C_b37	rs7867175	1.8e-15	0.7	Pancreas
ENSG00000044459.10	CNTLN	9_17289795_G_T_b37	rs140810883	1.8e-15	0.72	Pancreas
ENSG00000044459.10	CNTLN	9_17314532_T_G_b37	rs10810752	1.9e-15	-0.61	Pancreas
ENSG00000044459.10	CNTLN	9_17281278_A_T_b37	rs1889088	1.9e-15	0.29	Adipose - Visceral (Omentum)
ENSG00000044459.10	CNTLN	9_17085737_G_A_b37	rs10810713	1.9e-15	0.45	Nerve - Tibial
ENSG00000044459.10	CNTLN	9_17312932_A_G_b37	rs10810750	1.9e-15	-0.4	Esophagus - Muscularis
ENSG00000044459.10	CNTLN	9_17413556_C_T_b37	rs7019482	1.9e-15	0.28	Thyroid
ENSG00000044459.10	CNTLN	9_17348143_A_T_b37	rs12378677	1.9e-15	0.45	Esophagus - Muscularis
ENSG00000044459.10	CNTLN	9_17353732_G_A_b37	rs13289670	1.9e-15	0.45	Esophagus - Muscularis
ENSG00000044459.10	CNTLN	9_17353904_C_T_b37	rs10963060	1.9e-15	0.45	Esophagus - Muscularis
ENSG00000044459.10	CNTLN	9_17355032_C_T_b37	rs10810772	1.9e-15	0.45	Esophagus - Muscularis
ENSG00000044459.10	CNTLN	9_17360399_G_T_b37	rs35375281	1.9e-15	0.45	Esophagus - Muscularis
ENSG00000044459.10	CNTLN	9_17368850_C_T_b37	rs2151342	1.9e-15	0.45	Esophagus - Muscularis
ENSG00000044459.10	CNTLN	9_17333453_G_A_b37	rs7031133	1.9e-15	-0.61	Pancreas
ENSG00000044459.10	CNTLN	9_17290094_A_T_b37	rs114658868	1.9e-15	0.7	Pancreas
ENSG00000044459.10	CNTLN	9_17298547_C_G_b37	rs3739490	1.9e-15	0.7	Pancreas
ENSG00000044459.10	CNTLN	9_17300057_A_C_b37	rs60520802	1.9e-15	0.7	Pancreas
ENSG00000044459.10	CNTLN	9_17357914_C_T_b37	rs9695844	2e-15	-0.41	Esophagus - Muscularis
ENSG00000044459.10	CNTLN	9_17364514_T_C_b37	rs10122987	2e-15	-0.23	Adipose - Subcutaneous
ENSG00000044459.10	CNTLN	9_17255442_C_A_b37	rs10962950	2e-15	0.61	Pancreas
ENSG00000044459.10	CNTLN	9_17391822_G_C_b37	rs1442524	2e-15	-0.27	Thyroid
ENSG00000044459.10	CNTLN	9_17326488_T_A_b37	rs10810758	2e-15	0.28	Adipose - Visceral (Omentum)
ENSG00000044459.10	CNTLN	9_17313678_T_A_b37	rs7864650	2e-15	-0.23	Adipose - Subcutaneous
ENSG00000044459.10	CNTLN	9_17301713_A_G_b37	rs10963018	2e-15	0.3	Adipose - Visceral (Omentum)
ENSG00000044459.10	CNTLN	9_17319339_T_C_b37	rs4272484	2e-15	-0.23	Adipose - Subcutaneous
ENSG00000044459.10	CNTLN	9_17336338_C_G_b37	rs4961539	2e-15	-0.24	Adipose - Subcutaneous
ENSG00000044459.10	CNTLN	9_17269126_G_A_b37	rs59833414	2.1e-15	0.71	Pancreas
ENSG00000044459.10	CNTLN	9_17127373_A_T_b37	rs10810732	2.1e-15	0.44	Nerve - Tibial
ENSG00000044459.10	CNTLN	9_17413556_C_T_b37	rs7019482	2.1e-15	0.66	Pancreas
ENSG00000044459.10	CNTLN	9_17426733_C_T_b37	rs2584553	2.1e-15	-0.61	Pancreas
ENSG00000044459.10	CNTLN	9_17320544_A_G_b37	rs10810754	2.1e-15	-0.39	Esophagus - Muscularis
ENSG00000044459.10	CNTLN	9_17318647_C_T_b37	rs12337171	2.1e-15	-0.23	Adipose - Subcutaneous
ENSG00000044459.10	CNTLN	9_17312932_A_G_b37	rs10810750	2.1e-15	-0.24	Adipose - Subcutaneous
ENSG00000044459.10	CNTLN	9_17302341_A_G_b37	rs619380	2.1e-15	0.61	Pancreas
ENSG00000044459.10	CNTLN	9_17276823_G_A_b37	rs11795325	2.1e-15	0.29	Adipose - Visceral (Omentum)
ENSG00000044459.10	CNTLN	9_17281923_G_A_b37	rs10963000	2.2e-15	0.29	Adipose - Visceral (Omentum)
ENSG00000044459.10	CNTLN	9_17283020_A_G_b37	rs7041744	2.2e-15	0.29	Adipose - Visceral (Omentum)
ENSG00000044459.10	CNTLN	9_17283597_C_G_b37	rs10810746	2.2e-15	0.29	Adipose - Visceral (Omentum)
ENSG00000044459.10	CNTLN	9_17283690_T_C_b37	rs10963005	2.2e-15	0.29	Adipose - Visceral (Omentum)
ENSG00000044459.10	CNTLN	9_17284073_A_G_b37	rs4626705	2.2e-15	0.29	Adipose - Visceral (Omentum)
ENSG00000044459.10	CNTLN	9_17370800_A_T_b37	rs13285704	2.2e-15	0.71	Pancreas
ENSG00000044459.10	CNTLN	9_17278726_A_G_b37	rs13292550	2.2e-15	0.3	Adipose - Visceral (Omentum)
ENSG00000044459.10	CNTLN	9_17339879_C_T_b37	rs7854724	2.2e-15	-0.4	Esophagus - Muscularis
ENSG00000044459.10	CNTLN	9_17325704_C_G_b37	rs10756867	2.2e-15	-0.4	Esophagus - Muscularis
ENSG00000044459.10	CNTLN	9_17364514_T_C_b37	rs10122987	2.2e-15	-0.62	Pancreas
ENSG00000044459.10	CNTLN	9_17329964_A_G_b37	rs1442528	2.2e-15	0.57	Esophagus - Gastroesophageal Junction
ENSG00000044459.10	CNTLN	9_17331446_A_T_b37	rs10810761	2.2e-15	-0.23	Adipose - Subcutaneous
ENSG00000044459.10	CNTLN	9_17310385_G_C_b37	rs10963022	2.3e-15	0.3	Adipose - Visceral (Omentum)
ENSG00000044459.10	CNTLN	9_17281271_A_AT_b37	rs397743400	2.3e-15	0.7	Pancreas
ENSG00000044459.10	CNTLN	9_17365351_T_C_b37	rs10123745	2.3e-15	-0.62	Pancreas
ENSG00000044459.10	CNTLN	9_17368900_A_G_b37	rs4961552	2.3e-15	-0.62	Pancreas
ENSG00000044459.10	CNTLN	9_17369684_A_G_b37	rs4961553	2.3e-15	-0.62	Pancreas
ENSG00000044459.10	CNTLN	9_17367399_T_TAAAA_b37	rs398073456	2.3e-15	-0.62	Pancreas
ENSG00000044459.10	CNTLN	9_17409888_C_G_b37	rs2780209	2.3e-15	-0.24	Adipose - Subcutaneous
ENSG00000044459.10	CNTLN	9_17343840_C_G_b37	rs12379538	2.3e-15	0.46	Esophagus - Muscularis
ENSG00000044459.10	CNTLN	9_17282186_G_C_b37	rs10963001	2.4e-15	0.29	Adipose - Visceral (Omentum)
ENSG00000044459.10	CNTLN	9_17334135_G_A_b37	rs10963041	2.4e-15	0.3	Adipose - Visceral (Omentum)
ENSG00000044459.10	CNTLN	9_17291973_C_T_b37	rs12377081	2.4e-15	0.3	Adipose - Visceral (Omentum)
ENSG00000044459.10	CNTLN	9_17335706_T_C_b37	rs10810762	2.4e-15	0.3	Adipose - Visceral (Omentum)
ENSG00000044459.10	CNTLN	9_17296529_C_T_b37	rs10963015	2.4e-15	0.3	Adipose - Visceral (Omentum)
ENSG00000044459.10	CNTLN	9_17297694_C_T_b37	rs17828423	2.4e-15	0.3	Adipose - Visceral (Omentum)
ENSG00000044459.10	CNTLN	9_17303255_C_T_b37	rs17755748	2.4e-15	0.3	Adipose - Visceral (Omentum)
ENSG00000044459.10	CNTLN	9_17339718_G_A_b37	rs10810764	2.4e-15	-0.4	Esophagus - Muscularis
ENSG00000044459.10	CNTLN	9_17293025_G_T_b37	rs670511	2.4e-15	0.39	Esophagus - Muscularis
ENSG00000044459.10	CNTLN	9_17295837_C_G_b37	rs2990670	2.4e-15	0.39	Esophagus - Muscularis
ENSG00000044459.10	CNTLN	9_17340377_A_G_b37	rs3824392	2.4e-15	-0.4	Esophagus - Muscularis
ENSG00000044459.10	CNTLN	9_17453200_G_A_b37	rs2584540	2.4e-15	-0.31	Thyroid
ENSG00000044459.10	CNTLN	9_17352810_T_G_b37	rs12376973	2.4e-15	0.46	Esophagus - Muscularis
ENSG00000044459.10	CNTLN	9_17292890_A_G_b37	rs670058	2.4e-15	0.23	Adipose - Subcutaneous
ENSG00000044459.10	CNTLN	9_17328201_G_C_b37	rs10810759	2.5e-15	0.46	Esophagus - Muscularis
ENSG00000044459.10	CNTLN	9_17410147_A_G_b37	rs12550857	2.5e-15	0.35	Nerve - Tibial
ENSG00000044459.10	CNTLN	9_17263325_T_A_b37	rs10756857	2.5e-15	0.61	Pancreas
ENSG00000044459.10	CNTLN	9_17428879_C_T_b37	rs2780201	2.5e-15	-0.24	Adipose - Subcutaneous
ENSG00000044459.10	CNTLN	9_17284641_TTTCTC_T_b37	rs369016594	2.5e-15	0.3	Adipose - Visceral (Omentum)
ENSG00000044459.10	CNTLN	9_17276104_T_C_b37	rs2027014	2.6e-15	0.43	Esophagus - Muscularis
ENSG00000044459.10	CNTLN	9_17301710_C_A_b37	rs632265	2.6e-15	0.62	Pancreas
ENSG00000044459.10	CNTLN	9_17278607_C_T_b37	rs34502029	2.6e-15	0.29	Adipose - Visceral (Omentum)
ENSG00000044459.10	CNTLN	9_17381799_G_A_b37	rs10810780	2.6e-15	0.28	Adipose - Visceral (Omentum)
ENSG00000044459.10	CNTLN	9_17266125_A_T_b37	rs7470216	2.6e-15	0.62	Pancreas
ENSG00000044459.10	CNTLN	9_17126944_G_A_b37	rs10810730	2.6e-15	0.44	Nerve - Tibial
ENSG00000044459.10	CNTLN	9_17321574_C_T_b37	rs9298774	2.6e-15	-0.23	Adipose - Subcutaneous
ENSG00000044459.10	CNTLN	9_17453200_G_A_b37	rs2584540	2.6e-15	-0.3	Adipose - Visceral (Omentum)
ENSG00000044459.10	CNTLN	9_17311944_T_G_b37	rs10963025	2.6e-15	0.3	Adipose - Visceral (Omentum)
ENSG00000044459.10	CNTLN	9_17291263_A_G_b37	rs34256131	2.6e-15	0.3	Adipose - Visceral (Omentum)
ENSG00000044459.10	CNTLN	9_17283132_G_A_b37	rs7042230	2.6e-15	0.3	Adipose - Visceral (Omentum)
ENSG00000044459.10	CNTLN	9_17303067_T_C_b37	rs1953106	2.6e-15	0.3	Adipose - Visceral (Omentum)
ENSG00000044459.10	CNTLN	9_17320881_A_G_b37	rs7028593	2.7e-15	-0.6	Pancreas
ENSG00000044459.10	CNTLN	9_17274319_G_T_b37	rs2779775	2.7e-15	0.23	Adipose - Subcutaneous
ENSG00000044459.10	CNTLN	9_17335050_A_C_b37	rs4317676	2.7e-15	0.3	Adipose - Visceral (Omentum)
ENSG00000044459.10	CNTLN	9_17398616_T_G_b37	rs7038186	2.7e-15	-0.23	Adipose - Subcutaneous
ENSG00000044459.10	CNTLN	9_17282681_C_G_b37	rs593614	2.7e-15	0.23	Adipose - Subcutaneous
ENSG00000044459.10	CNTLN	9_17275039_C_G_b37	rs10962994	2.7e-15	0.43	Esophagus - Muscularis
ENSG00000044459.10	CNTLN	9_17323254_C_T_b37	rs10963034	2.8e-15	0.28	Adipose - Visceral (Omentum)
ENSG00000044459.10	CNTLN	9_17326897_G_C_b37	rs10963035	2.8e-15	0.28	Adipose - Visceral (Omentum)
ENSG00000044459.10	CNTLN	9_17343041_C_A_b37	rs10963046	2.8e-15	0.28	Adipose - Visceral (Omentum)
ENSG00000044459.10	CNTLN	9_17262062_G_A_b37	rs10962958	2.8e-15	0.3	Adipose - Visceral (Omentum)
ENSG00000044459.10	CNTLN	9_17321382_T_C_b37	rs9298773	2.8e-15	-0.23	Adipose - Subcutaneous
ENSG00000044459.10	CNTLN	9_17373948_T_C_b37	rs10114083	2.8e-15	-0.23	Adipose - Subcutaneous
ENSG00000044459.10	CNTLN	9_17327135_T_TA_b37	rs71492912	2.8e-15	0.28	Adipose - Visceral (Omentum)
ENSG00000044459.10	CNTLN	9_17271479_GT_G_b37	rs397736711	2.8e-15	0.3	Adipose - Visceral (Omentum)
ENSG00000044459.10	CNTLN	9_17302919_T_A_b37	rs1759454	2.8e-15	0.23	Adipose - Subcutaneous
ENSG00000044459.10	CNTLN	9_17283550_T_G_b37	rs10810745	2.8e-15	0.29	Adipose - Visceral (Omentum)
ENSG00000044459.10	CNTLN	9_17290094_A_T_b37	rs114658868	2.9e-15	0.29	Adipose - Visceral (Omentum)
ENSG00000044459.10	CNTLN	9_17292165_T_C_b37	rs11515075	2.9e-15	0.29	Adipose - Visceral (Omentum)
ENSG00000044459.10	CNTLN	9_17298547_C_G_b37	rs3739490	2.9e-15	0.29	Adipose - Visceral (Omentum)
ENSG00000044459.10	CNTLN	9_17291778_T_C_b37	rs7867175	2.9e-15	0.29	Adipose - Visceral (Omentum)
ENSG00000044459.10	CNTLN	9_17268584_T_C_b37	rs10962982	2.9e-15	0.39	Esophagus - Muscularis
ENSG00000044459.10	CNTLN	9_17357265_G_GT_b37	rs397750534	2.9e-15	-0.61	Pancreas
ENSG00000044459.10	CNTLN	9_17267371_C_G_b37	rs7018705	3e-15	0.39	Esophagus - Muscularis
ENSG00000044459.10	CNTLN	9_17344707_C_A_b37	rs10963049	3e-15	0.28	Adipose - Visceral (Omentum)
ENSG00000044459.10	CNTLN	9_17249636_T_C_b37	rs7033974	3e-15	0.6	Pancreas
ENSG00000044459.10	CNTLN	9_17299872_T_A_b37	rs62558354	3e-15	0.29	Adipose - Visceral (Omentum)
ENSG00000044459.10	CNTLN	9_17350843_C_T_b37	rs10124487	3.1e-15	-0.23	Adipose - Subcutaneous
ENSG00000044459.10	CNTLN	9_17335050_A_C_b37	rs4317676	3.1e-15	0.45	Esophagus - Muscularis
ENSG00000044459.10	CNTLN	9_17276775_G_A_b37	rs2184063	3.1e-15	0.69	Pancreas
ENSG00000044459.10	CNTLN	9_17277778_T_A_b37	rs4375098	3.1e-15	0.43	Esophagus - Muscularis
ENSG00000044459.10	CNTLN	9_17326340_G_A_b37	rs11789786	3.1e-15	0.3	Adipose - Visceral (Omentum)
ENSG00000044459.10	CNTLN	9_17349531_A_T_b37	rs7873708	3.1e-15	-0.23	Adipose - Subcutaneous
ENSG00000044459.10	CNTLN	9_17279064_C_T_b37	rs1759613	3.2e-15	0.23	Adipose - Subcutaneous
ENSG00000044459.10	CNTLN	9_17271858_A_G_b37	rs654521	3.2e-15	0.39	Esophagus - Muscularis
ENSG00000044459.10	CNTLN	9_17410147_A_G_b37	rs12550857	3.2e-15	0.68	Pancreas
ENSG00000044459.10	CNTLN	9_17382575_A_G_b37	rs13283291	3.2e-15	0.3	Thyroid
ENSG00000044459.10	CNTLN	9_17281497_C_T_b37	rs10962998	3.3e-15	0.29	Adipose - Visceral (Omentum)
ENSG00000044459.10	CNTLN	9_17281538_G_T_b37	rs10962999	3.3e-15	0.29	Adipose - Visceral (Omentum)
ENSG00000044459.10	CNTLN	9_17400701_G_T_b37	rs4961559	3.3e-15	0.3	Thyroid
ENSG00000044459.10	CNTLN	9_17263748_T_G_b37	rs145190003	3.3e-15	0.7	Pancreas
ENSG00000044459.10	CNTLN	9_17400370_C_G_b37	rs10810786	3.3e-15	-0.23	Adipose - Subcutaneous
ENSG00000044459.10	CNTLN	9_17371690_C_T_b37	rs1596193	3.3e-15	-0.23	Adipose - Subcutaneous
ENSG00000044459.10	CNTLN	9_17279051_GAAC_G_b37	rs367907570	3.3e-15	0.3	Adipose - Visceral (Omentum)
ENSG00000044459.10	CNTLN	9_17334135_G_A_b37	rs10963041	3.3e-15	0.45	Esophagus - Muscularis
ENSG00000044459.10	CNTLN	9_17257157_A_T_b37	rs62558300	3.4e-15	0.3	Adipose - Visceral (Omentum)
ENSG00000044459.10	CNTLN	9_17413137_G_GATT_b37	rs141477261	3.4e-15	-0.24	Adipose - Subcutaneous
ENSG00000044459.10	CNTLN	9_17327587_T_C_b37	rs13293083	3.4e-15	0.28	Adipose - Visceral (Omentum)
ENSG00000044459.10	CNTLN	9_17281216_G_A_b37	rs10962996	3.4e-15	0.29	Adipose - Visceral (Omentum)
ENSG00000044459.10	CNTLN	9_17292845_AG_A_b37	rs35876302	3.4e-15	0.29	Adipose - Visceral (Omentum)
ENSG00000044459.10	CNTLN	9_17295223_T_C_b37	rs4424358	3.4e-15	0.59	Pancreas
ENSG00000044459.10	CNTLN	9_17284013_TTTTG_T_b37	rs373542765	3.5e-15	0.29	Adipose - Visceral (Omentum)
ENSG00000044459.10	CNTLN	9_17325704_C_G_b37	rs10756867	3.5e-15	-0.61	Pancreas
ENSG00000044459.10	CNTLN	9_17391822_G_C_b37	rs1442524	3.5e-15	-0.39	Esophagus - Muscularis
ENSG00000044459.10	CNTLN	9_17284111_A_C_b37	rs4574939	3.5e-15	0.43	Esophagus - Muscularis
ENSG00000044459.10	CNTLN	9_17281961_C_CT_b37	rs397893175	3.5e-15	0.44	Esophagus - Muscularis
ENSG00000044459.10	CNTLN	9_17273175_G_GA_b37	rs397813880	3.5e-15	0.23	Adipose - Subcutaneous
ENSG00000044459.10	CNTLN	9_17320544_A_G_b37	rs10810754	3.5e-15	-0.23	Adipose - Subcutaneous
ENSG00000044459.10	CNTLN	9_17116057_G_A_b37	rs4493994	3.5e-15	0.45	Nerve - Tibial
ENSG00000044459.10	CNTLN	9_17253882_C_T_b37	rs62558297	3.6e-15	0.31	Adipose - Visceral (Omentum)
ENSG00000044459.10	CNTLN	9_17271858_A_G_b37	rs654521	3.6e-15	0.6	Pancreas
ENSG00000044459.10	CNTLN	9_17320881_A_G_b37	rs7028593	3.6e-15	-0.23	Adipose - Subcutaneous
ENSG00000044459.10	CNTLN	9_17335706_T_C_b37	rs10810762	3.6e-15	0.45	Esophagus - Muscularis
ENSG00000044459.10	CNTLN	9_17365276_C_T_b37	rs62558966	3.6e-15	0.45	Esophagus - Muscularis
ENSG00000044459.10	CNTLN	9_17391536_A_G_b37	rs1442523	3.7e-15	-0.39	Esophagus - Muscularis
ENSG00000044459.10	CNTLN	9_17265490_C_G_b37	rs13288652	3.7e-15	0.29	Adipose - Visceral (Omentum)
ENSG00000044459.10	CNTLN	9_17331647_G_A_b37	rs10963039	3.7e-15	0.46	Esophagus - Muscularis
ENSG00000044459.10	CNTLN	9_17300093_G_A_b37	rs2779776	3.8e-15	0.23	Adipose - Subcutaneous
ENSG00000044459.10	CNTLN	9_17162413_C_T_b37	rs6475111	3.8e-15	0.3	Cells - Transformed fibroblasts
ENSG00000044459.10	CNTLN	9_17379340_T_C_b37	rs36057268	3.8e-15	-0.23	Adipose - Subcutaneous
ENSG00000044459.10	CNTLN	9_17290979_T_C_b37	rs605482	3.8e-15	0.23	Adipose - Subcutaneous
ENSG00000044459.10	CNTLN	9_17291057_A_G_b37	rs605916	3.9e-15	0.23	Adipose - Subcutaneous
ENSG00000044459.10	CNTLN	9_17300060_G_A_b37	rs2779778	3.9e-15	0.23	Adipose - Subcutaneous
ENSG00000044459.10	CNTLN	9_17300064_C_T_b37	rs2780206	3.9e-15	0.23	Adipose - Subcutaneous
ENSG00000044459.10	CNTLN	9_17355341_T_C_b37	rs10963063	3.9e-15	-0.23	Adipose - Subcutaneous
ENSG00000044459.10	CNTLN	9_17403132_A_G_b37	rs12339564	4e-15	-0.23	Adipose - Subcutaneous
ENSG00000044459.10	CNTLN	9_17299120_A_G_b37	rs7026852	4e-15	0.29	Adipose - Visceral (Omentum)
ENSG00000044459.10	CNTLN	9_17343013_A_G_b37	rs10963045	4.1e-15	0.28	Adipose - Visceral (Omentum)
ENSG00000044459.10	CNTLN	9_17343116_A_G_b37	rs10810766	4.1e-15	0.28	Adipose - Visceral (Omentum)
ENSG00000044459.10	CNTLN	9_17343261_G_A_b37	rs10810767	4.1e-15	0.28	Adipose - Visceral (Omentum)
ENSG00000044459.10	CNTLN	9_17342571_GA_G_b37	rs68056113	4.1e-15	0.28	Adipose - Visceral (Omentum)
ENSG00000044459.10	CNTLN	9_17280827_C_G_b37	rs870271	4.1e-15	0.23	Adipose - Subcutaneous
ENSG00000044459.10	CNTLN	9_17367325_C_A_b37	rs3861711	4.1e-15	-0.23	Adipose - Subcutaneous
ENSG00000044459.10	CNTLN	9_17343787_C_T_b37	rs10963048	4.2e-15	0.28	Adipose - Visceral (Omentum)
ENSG00000044459.10	CNTLN	9_17454820_G_A_b37	rs1372703	4.2e-15	-0.29	Adipose - Visceral (Omentum)
ENSG00000044459.10	CNTLN	9_17324268_C_T_b37	rs10810756	4.2e-15	-0.23	Adipose - Subcutaneous
ENSG00000044459.10	CNTLN	9_17331446_A_T_b37	rs10810761	4.2e-15	-0.62	Pancreas
ENSG00000044459.10	CNTLN	9_17311944_T_G_b37	rs10963025	4.2e-15	0.45	Esophagus - Muscularis
ENSG00000044459.10	CNTLN	9_17110021_A_T_b37	rs10810724	4.2e-15	0.45	Nerve - Tibial
ENSG00000044459.10	CNTLN	9_17338186_G_C_b37	rs10963042	4.3e-15	-0.46	Esophagus - Muscularis
ENSG00000044459.10	CNTLN	9_17343840_C_G_b37	rs12379538	4.3e-15	0.3	Adipose - Visceral (Omentum)
ENSG00000044459.10	CNTLN	9_17300057_A_C_b37	rs60520802	4.3e-15	0.29	Adipose - Visceral (Omentum)
ENSG00000044459.10	CNTLN	9_17249540_T_G_b37	rs12236820	4.4e-15	0.39	Esophagus - Muscularis
ENSG00000044459.10	CNTLN	9_17340383_G_A_b37	rs3824391	4.4e-15	-0.4	Esophagus - Muscularis
ENSG00000044459.10	CNTLN	9_17110624_A_G_b37	rs10962873	4.4e-15	0.45	Nerve - Tibial
ENSG00000044459.10	CNTLN	9_17336492_G_A_b37	rs10738474	4.5e-15	-0.39	Esophagus - Muscularis
ENSG00000044459.10	CNTLN	9_17281961_C_CT_b37	rs397893175	4.5e-15	0.3	Thyroid
ENSG00000044459.10	CNTLN	9_17279838_T_C_b37	rs1759441	4.5e-15	0.23	Adipose - Subcutaneous
ENSG00000044459.10	CNTLN	9_17336882_C_T_b37	rs7044462	4.5e-15	-0.6	Pancreas
ENSG00000044459.10	CNTLN	9_17249636_T_C_b37	rs7033974	4.6e-15	0.39	Esophagus - Muscularis
ENSG00000044459.10	CNTLN	9_17303067_T_C_b37	rs1953106	4.6e-15	0.45	Esophagus - Muscularis
ENSG00000044459.10	CNTLN	9_17358477_A_C_b37	rs4961547	4.6e-15	-0.62	Pancreas
ENSG00000044459.10	CNTLN	9_17347872_C_T_b37	rs7865766	4.6e-15	-0.23	Adipose - Subcutaneous
ENSG00000044459.10	CNTLN	9_17284805_T_C_b37	rs2095156	4.7e-15	0.3	Adipose - Visceral (Omentum)
ENSG00000044459.10	CNTLN	9_17263439_T_G_b37	rs9802710	4.7e-15	0.59	Pancreas
ENSG00000044459.10	CNTLN	9_17326340_G_A_b37	rs11789786	4.7e-15	0.45	Esophagus - Muscularis
ENSG00000044459.10	CNTLN	9_17370957_G_A_b37	rs13286365	4.7e-15	0.71	Pancreas
ENSG00000044459.10	CNTLN	9_17254620_A_T_b37	rs7046933	4.7e-15	0.61	Pancreas
ENSG00000044459.10	CNTLN	9_17303726_A_T_b37	rs10963019	4.8e-15	0.3	Adipose - Visceral (Omentum)
ENSG00000044459.10	CNTLN	9_17372261_G_T_b37	rs12379104	4.8e-15	-0.61	Pancreas
ENSG00000044459.10	CNTLN	9_17413208_C_T_b37	rs34105027	4.9e-15	-0.27	Thyroid
ENSG00000044459.10	CNTLN	9_17273731_A_G_b37	rs3808795	4.9e-15	0.3	Thyroid
ENSG00000044459.10	CNTLN	9_17269437_G_T_b37	rs10962988	4.9e-15	0.6	Pancreas
ENSG00000044459.10	CNTLN	9_17299872_T_A_b37	rs62558354	4.9e-15	0.69	Pancreas
ENSG00000044459.10	CNTLN	9_17299017_G_A_b37	rs35884270	4.9e-15	0.46	Esophagus - Muscularis
ENSG00000044459.10	CNTLN	9_17327807_T_C_b37	rs62561379	5e-15	0.28	Adipose - Visceral (Omentum)
ENSG00000044459.10	CNTLN	9_17257324_A_G_b37	rs62558301	5e-15	0.3	Adipose - Visceral (Omentum)
ENSG00000044459.10	CNTLN	9_17255537_C_G_b37	rs11789418	5.1e-15	0.31	Thyroid
ENSG00000044459.10	CNTLN	9_17454685_C_T_b37	rs753393	5.1e-15	-0.6	Pancreas
ENSG00000044459.10	CNTLN	9_17346914_C_T_b37	rs6475139	5.2e-15	-0.23	Adipose - Subcutaneous
ENSG00000044459.10	CNTLN	9_17328476_C_T_b37	rs10756868	5.3e-15	0.28	Adipose - Visceral (Omentum)
ENSG00000044459.10	CNTLN	9_17336882_C_T_b37	rs7044462	5.3e-15	-0.23	Adipose - Subcutaneous
ENSG00000044459.10	CNTLN	9_17124420_T_C_b37	rs10810726	5.4e-15	0.45	Nerve - Tibial
ENSG00000044459.10	CNTLN	9_17125742_A_G_b37	rs10810729	5.4e-15	0.45	Nerve - Tibial
ENSG00000044459.10	CNTLN	9_17113551_G_A_b37	rs10962875	5.4e-15	0.45	Nerve - Tibial
ENSG00000044459.10	CNTLN	9_17253289_T_A_b37	rs34597155	5.4e-15	0.74	Pancreas
ENSG00000044459.10	CNTLN	9_17295260_A_C_b37	rs4409489	5.5e-15	0.23	Adipose - Subcutaneous
ENSG00000044459.10	CNTLN	9_17079535_A_AC_b37	rs146032606	5.5e-15	0.45	Nerve - Tibial
ENSG00000044459.10	CNTLN	9_17368458_C_T_b37	rs4961437	5.6e-15	-0.23	Adipose - Subcutaneous
ENSG00000044459.10	CNTLN	9_17399095_T_G_b37	rs7041840	5.6e-15	-0.23	Adipose - Subcutaneous
ENSG00000044459.10	CNTLN	9_17301710_C_A_b37	rs632265	5.6e-15	0.23	Adipose - Subcutaneous
ENSG00000044459.10	CNTLN	9_17398404_G_A_b37	rs4961557	5.7e-15	-0.23	Adipose - Subcutaneous
ENSG00000044459.10	CNTLN	9_17343708_G_A_b37	rs10963047	5.7e-15	0.28	Adipose - Visceral (Omentum)
ENSG00000044459.10	CNTLN	9_17303255_C_T_b37	rs17755748	5.7e-15	0.45	Esophagus - Muscularis
ENSG00000044459.10	CNTLN	9_17355890_GTC_G_b37	rs35917270	5.7e-15	-0.23	Adipose - Subcutaneous
ENSG00000044459.10	CNTLN	9_17281961_C_CT_b37	rs397893175	5.8e-15	0.29	Adipose - Visceral (Omentum)
ENSG00000044459.10	CNTLN	9_17439798_A_G_b37	rs2780198	5.8e-15	-0.23	Adipose - Subcutaneous
ENSG00000044459.10	CNTLN	9_17391822_G_C_b37	rs1442524	5.8e-15	-0.23	Adipose - Subcutaneous
ENSG00000044459.10	CNTLN	9_17447446_C_T_b37	rs2593411	5.9e-15	-0.59	Pancreas
ENSG00000044459.10	CNTLN	9_17249911_T_A_b37	rs10962944	5.9e-15	0.3	Thyroid
ENSG00000044459.10	CNTLN	9_17401898_C_G_b37	rs10963082	5.9e-15	1.1	Pancreas
ENSG00000044459.10	CNTLN	9_17120267_T_C_b37	rs1016100	5.9e-15	0.45	Nerve - Tibial
ENSG00000044459.10	CNTLN	9_17365276_C_T_b37	rs62558966	6e-15	0.3	Adipose - Visceral (Omentum)
ENSG00000044459.10	CNTLN	9_17381799_G_A_b37	rs10810780	6e-15	0.28	Thyroid
ENSG00000044459.10	CNTLN	9_17211990_G_A_b37	rs10962907	6e-15	0.37	Nerve - Tibial
ENSG00000044459.10	CNTLN	9_17293025_G_T_b37	rs670511	6e-15	0.59	Pancreas
ENSG00000044459.10	CNTLN	9_17295837_C_G_b37	rs2990670	6e-15	0.59	Pancreas
ENSG00000044459.10	CNTLN	9_17262898_C_G_b37	rs13292380	6.1e-15	0.29	Adipose - Visceral (Omentum)
ENSG00000044459.10	CNTLN	9_17414823_C_A_b37	rs2593387	6.1e-15	-0.27	Thyroid
ENSG00000044459.10	CNTLN	9_17453200_G_A_b37	rs2584540	6.1e-15	-0.69	Pancreas
ENSG00000044459.10	CNTLN	9_17273628_C_CAG_b37	rs3840729	6.2e-15	0.43	Esophagus - Muscularis
ENSG00000044459.10	CNTLN	9_17347258_A_G_b37	rs7864919	6.2e-15	-0.23	Adipose - Subcutaneous
ENSG00000044459.10	CNTLN	9_17087885_C_T_b37	rs10962861	6.2e-15	0.44	Nerve - Tibial
ENSG00000044459.10	CNTLN	9_17325704_C_G_b37	rs10756867	6.2e-15	-0.23	Adipose - Subcutaneous
ENSG00000044459.10	CNTLN	9_17386062_T_C_b37	rs12345267	6.3e-15	-0.23	Adipose - Subcutaneous
ENSG00000044459.10	CNTLN	9_17271858_A_G_b37	rs654521	6.3e-15	0.23	Adipose - Subcutaneous
ENSG00000044459.10	CNTLN	9_17346898_T_G_b37	rs13301284	6.4e-15	0.45	Esophagus - Muscularis
ENSG00000044459.10	CNTLN	9_17358903_G_A_b37	rs11791000	6.4e-15	0.45	Esophagus - Muscularis
ENSG00000044459.10	CNTLN	9_17426808_C_G_b37	rs2584554	6.4e-15	-0.6	Pancreas
ENSG00000044459.10	CNTLN	9_17293025_G_T_b37	rs670511	6.4e-15	0.23	Adipose - Subcutaneous
ENSG00000044459.10	CNTLN	9_17295837_C_G_b37	rs2990670	6.4e-15	0.23	Adipose - Subcutaneous
ENSG00000044459.10	CNTLN	9_17274331_T_A_b37	rs13290659	6.6e-15	0.43	Esophagus - Muscularis
ENSG00000044459.10	CNTLN	9_17371019_A_G_b37	rs13289968	6.7e-15	0.44	Esophagus - Muscularis
ENSG00000044459.10	CNTLN	9_17345018_T_C_b37	rs10963050	6.7e-15	0.27	Adipose - Visceral (Omentum)
ENSG00000044459.10	CNTLN	9_17265477_C_G_b37	rs13288642	6.8e-15	0.7	Pancreas
ENSG00000044459.10	CNTLN	9_17325675_G_C_b37	rs10756866	6.9e-15	-0.39	Esophagus - Muscularis
ENSG00000044459.10	CNTLN	9_17380962_C_G_b37	rs7028577	6.9e-15	0.44	Esophagus - Muscularis
ENSG00000044459.10	CNTLN	9_17051683_C_T_b37	rs112221208	7e-15	0.43	Nerve - Tibial
ENSG00000044459.10	CNTLN	9_17454593_G_A_b37	rs894379	7.1e-15	-0.29	Adipose - Visceral (Omentum)
ENSG00000044459.10	CNTLN	9_17435459_A_G_b37	rs2584535	7.1e-15	-0.6	Pancreas
ENSG00000044459.10	CNTLN	9_17333747_CAT_C_b37	rs3840727	7.1e-15	-0.23	Adipose - Subcutaneous
ENSG00000044459.10	CNTLN	9_17076974_C_A_b37	rs112860165	7.1e-15	0.43	Nerve - Tibial
ENSG00000044459.10	CNTLN	9_17435929_G_A_b37	rs2593412	7.1e-15	-0.6	Pancreas
ENSG00000044459.10	CNTLN	9_17310822_T_C_b37	rs13287407	7.2e-15	0.3	Adipose - Visceral (Omentum)
ENSG00000044459.10	CNTLN	9_17370957_G_A_b37	rs13286365	7.5e-15	0.44	Esophagus - Muscularis
ENSG00000044459.10	CNTLN	9_17273926_C_G_b37	rs12379655	7.5e-15	0.43	Esophagus - Muscularis
ENSG00000044459.10	CNTLN	9_17440278_A_G_b37	rs2780199	7.6e-15	-0.59	Pancreas
ENSG00000044459.10	CNTLN	9_17425664_C_G_b37	rs1348278	7.6e-15	0.52	Esophagus - Gastroesophageal Junction
ENSG00000044459.10	CNTLN	9_17413210_CA_C_b37	rs34931239	7.6e-15	-0.23	Adipose - Subcutaneous
ENSG00000044459.10	CNTLN	9_17281271_A_AT_b37	rs397743400	7.7e-15	0.44	Esophagus - Muscularis
ENSG00000044459.10	CNTLN	9_17127007_T_C_b37	rs10810731	7.9e-15	0.43	Nerve - Tibial
ENSG00000044459.10	CNTLN	9_17313926_C_T_b37	rs10963026	7.9e-15	-0.61	Pancreas
ENSG00000044459.10	CNTLN	9_17310385_G_C_b37	rs10963022	8.2e-15	0.45	Esophagus - Muscularis
ENSG00000044459.10	CNTLN	9_17406235_A_G_b37	rs36051199	8.3e-15	0.29	Adipose - Visceral (Omentum)
ENSG00000044459.10	CNTLN	9_17324268_C_T_b37	rs10810756	8.3e-15	-0.6	Pancreas
ENSG00000044459.10	CNTLN	9_17391173_A_G_b37	rs10123109	8.3e-15	-0.38	Esophagus - Muscularis
ENSG00000044459.10	CNTLN	9_17364157_A_C_b37	rs7862069	8.5e-15	-0.6	Pancreas
ENSG00000044459.10	CNTLN	9_17291778_T_C_b37	rs7867175	8.7e-15	0.31	Thyroid
ENSG00000044459.10	CNTLN	9_17312932_A_G_b37	rs10810750	8.8e-15	-0.59	Pancreas
ENSG00000044459.10	CNTLN	9_17290094_A_T_b37	rs114658868	8.9e-15	0.31	Thyroid
ENSG00000044459.10	CNTLN	9_17336338_C_G_b37	rs4961539	9e-15	-0.6	Pancreas
ENSG00000044459.10	CNTLN	9_17281271_A_AT_b37	rs397743400	9e-15	0.31	Thyroid
ENSG00000044459.10	CNTLN	9_17383993_G_T_b37	rs12156444	9.1e-15	0.29	Adipose - Visceral (Omentum)
ENSG00000044459.10	CNTLN	9_17370778_A_G_b37	rs13285577	9.1e-15	0.45	Esophagus - Muscularis
ENSG00000044459.10	CNTLN	9_17290979_T_C_b37	rs605482	9.1e-15	0.59	Pancreas
ENSG00000044459.10	CNTLN	9_17371019_A_G_b37	rs13289968	9.2e-15	0.3	Adipose - Visceral (Omentum)
ENSG00000044459.10	CNTLN	9_17358066_G_A_b37	rs4961544	9.3e-15	-0.61	Pancreas
ENSG00000044459.10	CNTLN	9_17326340_G_A_b37	rs11789786	9.3e-15	0.72	Pancreas
ENSG00000044459.10	CNTLN	9_17273175_G_GA_b37	rs397813880	9.3e-15	0.39	Esophagus - Muscularis
ENSG00000044459.10	CNTLN	9_17362540_G_C_b37	rs12377334	9.4e-15	0.3	Adipose - Visceral (Omentum)
ENSG00000044459.10	CNTLN	9_17391173_A_G_b37	rs10123109	9.4e-15	-0.23	Adipose - Subcutaneous
ENSG00000044459.10	CNTLN	9_17276823_G_A_b37	rs11795325	9.5e-15	0.29	Thyroid
ENSG00000044459.10	CNTLN	9_17268584_T_C_b37	rs10962982	9.6e-15	0.23	Adipose - Subcutaneous
ENSG00000044459.10	CNTLN	9_17373948_T_C_b37	rs10114083	9.7e-15	-0.6	Pancreas
ENSG00000044459.10	CNTLN	9_17299120_A_G_b37	rs7026852	9.7e-15	0.31	Thyroid
ENSG00000044459.10	CNTLN	9_17312793_A_C_b37	rs61565870	9.7e-15	0.45	Esophagus - Muscularis
ENSG00000044459.10	CNTLN	9_17347722_T_C_b37	rs7851890	9.9e-15	-0.24	Adipose - Subcutaneous
ENSG00000044459.10	CNTLN	9_17291057_A_G_b37	rs605916	9.9e-15	0.59	Pancreas
ENSG00000044459.10	CNTLN	9_17300060_G_A_b37	rs2779778	9.9e-15	0.59	Pancreas
ENSG00000044459.10	CNTLN	9_17300064_C_T_b37	rs2780206	9.9e-15	0.59	Pancreas
ENSG00000044459.10	CNTLN	9_17300093_G_A_b37	rs2779776	9.9e-15	0.59	Pancreas
ENSG00000044459.10	CNTLN	9_17281497_C_T_b37	rs10962998	1e-14	0.31	Thyroid
ENSG00000044459.10	CNTLN	9_17281538_G_T_b37	rs10962999	1e-14	0.31	Thyroid
ENSG00000044459.10	CNTLN	9_17267371_C_G_b37	rs7018705	1e-14	0.23	Adipose - Subcutaneous
ENSG00000044459.10	CNTLN	9_17390339_C_T_b37	rs10116140	1e-14	-0.38	Esophagus - Muscularis
ENSG00000044459.10	CNTLN	9_17372261_G_T_b37	rs12379104	1e-14	-0.23	Adipose - Subcutaneous
ENSG00000044459.10	CNTLN	9_17390202_A_G_b37	rs10810782	1e-14	-0.39	Esophagus - Muscularis
ENSG00000044459.10	CNTLN	9_17300057_A_C_b37	rs60520802	1.1e-14	0.31	Thyroid
ENSG00000044459.10	CNTLN	9_17446292_C_T_b37	rs2584537	1.1e-14	-0.23	Adipose - Subcutaneous
ENSG00000044459.10	CNTLN	9_17265321_G_A_b37	rs11560448	1.1e-14	0.22	Adipose - Subcutaneous
ENSG00000044459.10	CNTLN	9_17127664_T_C_b37	rs10810733	1.1e-14	0.43	Nerve - Tibial
ENSG00000044459.10	CNTLN	9_17281216_G_A_b37	rs10962996	1.1e-14	0.3	Thyroid
ENSG00000044459.10	CNTLN	9_17292845_AG_A_b37	rs35876302	1.1e-14	0.3	Thyroid
ENSG00000044459.10	CNTLN	9_17299342_T_C_b37	rs10963017	1.1e-14	0.44	Esophagus - Muscularis
ENSG00000044459.10	CNTLN	9_17359662_G_A_b37	rs7864270	1.1e-14	-0.41	Esophagus - Muscularis
ENSG00000044459.10	CNTLN	9_17265477_C_G_b37	rs13288642	1.1e-14	0.31	Thyroid
ENSG00000044459.10	CNTLN	9_17366296_A_ATTG_b37	rs10686546	1.1e-14	-0.23	Adipose - Subcutaneous
[truncated: 9,496 more rows]

## Sheet: 40 SNPs eQTL all tissues
Gencode Id	Gene Symbol	Variant Id	SNP Id	P-Value	NES	Tissue
ENSG00000173068.13	BNC2	9_16891647_C_T_b37	rs10124837	6.3e-06	0.18	Whole Blood
ENSG00000173068.13	BNC2	9_16889937_C_A_b37	rs10962662	3.2e-06	-0.18	Whole Blood
ENSG00000173068.13	BNC2	9_16878616_C_A_b37	rs10756823	5e-06	-0.18	Whole Blood

## Sheet: Overlap
Credible 1000:1		eQTL to BNC2	In credible set?		eQTL to SH3GL2	In credible set?		eQTL to c9orf92	In credible set?		eQTL to CNTLN	In credible set?
rs3814113		rs10125444	0		rs2038519	0		rs4961472	0		rs10963034	0
rs7032221		rs10123661	0		rs7851916	0					rs10810760	0
rs7866677		rs9298749	0		rs7851834	0					rs10963035	0
rs4631563		rs7044238	0		rs7852205	0					rs10756868	0
rs10810671		rs10118271	0		rs7870195	0					rs10963047	0
rs34131140		rs4961672	0		rs3780247	0					rs10963045	0
rs10738467		rs4961671	0		rs7855907	0					rs10810766	0
rs6475094		rs201682161	0		rs3780245	0					rs10810767	0
rs6475093		rs1412539	0		rs7852041	0					rs10963048	0
rs10738468		rs12553066	0		rs2038520	0					rs10963049	0
rs6475092		rs914654	0		rs75448047	0					rs10963050	0
rs112442786		rs4612477	0		rs2038518	0					rs10963046	0
rs113198237		rs10810656	0		rs2383038	0					rs62561379	0
rs4465052		rs10511616	0		rs78052987	0					rs13293083	0
rs4246134		rs12351507	0		rs73642002	0					rs10810757	0
rs55689948		rs10810654	0		rs6475157	0					rs10810758	0
rs7045767		rs10962654	0		rs7033680	0					rs7848128	0
rs4445329		rs10962655	0		rs3808750	0					rs68056113	0
rs4366169		rs7046433	0		rs3808747	0					rs71492912	0
rs7048397		rs1981224	0		rs73645103	0					rs12553068	0
rs10962692		rs10738466	0		rs7033092	0					rs59007332	0
rs12376998		rs80079889	0		rs3824387	0					rs397743400	0
rs10962691		rs62547350	0		rs7847429	0					rs1442528	0
rs80039758		rs10962650	0		rs3808746	0					rs12555618	0
rs113780397		rs796309761	0		rs3780242	0					rs7026852	0
rs199782476		rs10810655	0		rs941790	0					rs11515075	0
c9_pos16900214		rs746381956	0		rs34165460	0					rs35876302	0
rs10810666		rs10810652	0		rs13301671	0					rs3739490	0
rs12377421		rs10810650	0		rs13301942	0					rs62558354	0
rs181552334		rs7025549	0		rs7043190	0					rs60520802	0
rs10810665		rs7040151	0		rs12380405	0					rs10962996	0
rs12377389		rs12345776	0		rs55760530	0					rs10962998	0
rs10810668		rs10122763	0		rs11789256	0					rs10962999	0
rs10810669		rs4644350	0		rs11732333	0					rs7867175	0
rs62543619		rs7851398	0		rs56100724	0					rs10962944	0
rs10810670		rs2153272	0		rs10963135	0					rs114658868	0
rs62543618		rs36116821	0		rs34817792	0					rs369016594	0
rs10124837		rs10962672	0		rs10963125	0					rs10963025	0
rs10962662		rs35194519	0		rs12380444	0					rs367907570	0
rs10756823		rs28498684	0		rs1001265	0					rs10963017	0
		rs3927680	0		rs34622594	0					rs10963018	0
		rs1412537	0		rs13283993	0					rs34256131	0
		rs62541919	0		rs34816089	0					rs12377081	0
		rs10810661	0		rs10963126	0					rs10963015	0
		rs10962668	0		rs10963127	0					rs17828423	0
		rs2153271	0		rs62559788	0					rs1953106	0
		rs2151062	0		rs10963134	0					rs17755748	0
		rs2151061	0		rs10963136	0					rs7042230	0
		rs79457190	0		rs10963137	0					rs13287407	0
		rs10118247	0		rs9407816	0					rs13288642	0
		rs10810657	0		rs34672755	0					rs1889088	0
		rs201239981	0		rs10963133	0					rs13286365	0
		rs7851204	0		rs11791273	0					rs4317676	0
		rs10810649	0		rs11789277	0					rs34502029	0
		rs10465044	0		rs10963139	0					rs17829280	0
		rs7046749	0		rs398113307	0					rs10963019	0
		rs1416742	0		rs376996689	0					rs13285704	0
		rs10121817	0		rs3780244	0					rs13292550	0
		rs10962662	1		rs7851436	0					rs13289968	0
		rs10119177	0		rs9407817	0					rs59833414	0
		rs10481508	0		rs9406678	0					rs1348278	0
		rs138964001	0		rs10810800	0					rs10963041	0
		rs17725257	0		rs12380429	0					rs140810883	0
		rs7868594	0		rs796907052	0					rs34768018	0
		rs10756823	1		rs9407819	0					rs62558320	0
		rs10124837	1		rs11521307	0					rs10810745	0
		rs10733332	0		rs9407818	0					rs10810746	0
		rs6475091	0		rs10810802	0					rs10963005	0
		rs7029491	0		rs1555422	0					rs373542765	0
		rs7860102	0		rs10810803	0					rs4626705	0
		rs2225556	0		rs12375842	0					rs2383013	0
		rs10810651	0		rs13290210	0					rs10963000	0
		rs35640909	0		rs11792169	0					rs10963001	0
		rs2185272	0		rs9717446	0					rs7041744	0
		rs4422864	0		rs7866802	0					rs10963030	0
		rs397959556	0		rs7851266	0					rs13292365	0
		rs59717315	0		rs55998352	0					rs10810759	0
		rs6475090	0		rs7867259	0					rs10810762	0
		rs13288423	0		rs7851731	0					rs11789786	0
		rs1339547	0		rs7851130	0					rs35998538	0
		rs12337884	0		rs2593371	0					rs10962956	0
		rs10733334	0		rs10810801	0					rs145190003	0
		rs9776203	0		rs2593376	0					rs11523716	0
		rs4961670	0		rs1555424	0					rs11523726	0
		rs12350437	0		rs1555425	0					rs10963040	0
		rs4500176	0		rs2593381	0					rs13289755	0
		rs10733333	0		rs2593405	0					rs12379538	0
		rs1339552	0		rs7350221	0					rs62252889	0
		rs4961503	0		rs2754330	0					rs10963031	0
		rs10962641	0		rs2754320	0					rs13290659	0
		rs7043675	0		rs2754329	0					rs397736711	0
		rs4436220	0		rs10756889	0					rs35968717	0
		rs7847725	0		rs2593373	0					rs61565870	0
		rs796887614	0		rs2593375	0					rs13301284	0
		TOTAL	3		rs2475056	0					rs12376973	0
					rs398073457	0					rs62558966	0
					rs2593407	0					rs12378677	0
					rs36152474	0					rs13289670	0
					rs2593374	0					rs10963060	0
					rs11793646	0					rs10810772	0
					rs397894527	0					rs35375281	0
					rs36187842	0					rs2151342	0
					rs2754318	0					rs35884270	0
					rs36145543	0					rs11789741	0
					rs55885732	0					rs13286311	0
					rs2754328	0					rs62558300	0
					rs34609151	0					rs10810776	0
					rs1987534	0					rs10962958	0
					rs2593377	0					rs10962959	0
					rs2224454	0					rs10810755	0
					rs2593384	0					rs62558301	0
					rs2754321	0					rs11791000	0
					rs7851130	0					rs3840729	0
					rs2754334	0					rs13285577	0
					rs7851266	0					rs12379655	0
					rs7866802	0					rs12376938	0
					rs55998352	0					rs7028577	0
					rs7350278	0					rs13292380	0
					rs6475151	0					rs4574939	0
					rs2593408	0					rs11789418	0
					rs3824388	0					rs2095156	0
					rs7867259	0					rs796494963	0
					rs7851731	0					rs3808795	0
					rs10963146	0					rs35601090	0
					rs1973964	0					rs4375098	0
					rs2145666	0					rs10963022	0
					rs146575257	0					rs10963065	0
					rs2754338	0					rs10963078	0
					rs13294100	0					rs12376505	0
					rs10963166	0					rs10963077	0
					rs77074579	0					rs12377334	0
					rs7029216	0					rs11791463	0
					rs71492924	0					rs1372703	0
					rs546934620	0					rs10963073	0
					rs2593368	0					rs12156444	0
					rs10963165	0					rs1442517	0
					rs1033749	0					rs2027014	0
					rs2593392	0					rs10962949	0
					rs7848676	0					rs10963069	0
					rs2254582	0					rs2584540	0
					rs1004021	0					rs12553516	0
					rs13292977	0					rs36051199	0
					rs2593402	0					rs10962993	0
					rs3739487	0					rs397893175	0
					rs10963152	0					rs10963064	0
					rs2754315	0					rs2584538	0
					rs10963139	0					rs1348277	0
					rs10963153	0					rs894379	0
					rs10756891	0					rs10810743	0
					rs376996689	0					rs10962994	0
					rs2593369	0					rs10963072	0
					rs8181077	0					rs13283291	0
					rs189918221	0					rs13288652	0
					rs2754335	0					rs4961559	0
					rs2013982	0					rs10810780	0
					rs12375842	0					rs9298774	0
					rs7851436	0					rs2779773	0
					rs10963136	0					rs595894	0
					rs7043190	0					rs10810756	0
					rs10963137	0					rs11795325	0
					rs2208485	0					rs593614	0
					rs7860883	0					rs7028593	0
					rs12380444	0					rs58474114	0
					rs2593409	0					rs10963039	0
					rs11789277	0					rs10810765	0
					rs12380429	0					rs4961539	0
					rs11521307	0					rs870271	0
					rs13290210	0					rs7044462	0
					rs55760530	0					rs398113305	0
					rs12380405	0					rs619380	0
					rs3824388	0					rs670058	0
					rs2754341	0					rs645117	0
					rs3758216	0					rs4409489	0
					rs10963133	0					rs605469	0
					rs34672755	0					rs397756102	0
					rs11792169	0					rs2184063	0
					rs71492924	0					rs7864650	0
					rs2593380	0					rs10962955	0
					rs11789256	0					rs12337171	0
					rs56100724	0					rs4272484	0
					rs11732333	0					rs2779775	0
					rs62559788	0					rs10810749	0
					rs10963134	0					rs1759613	0
					rs796907052	0					rs10114083	0
					rs34622594	0					rs3840727	0
					rs117657636	0					rs10963026	0
					rs10963165	0					rs34597155	0
					rs10963125	0					rs10531584	0
					rs34817792	0					rs10756876	0
					rs10963135	0					rs1759441	0
					rs1555422	0					rs10123745	0
					rs34816089	0					rs7022060	0
					rs34165460	0					rs10810752	0
					rs13301671	0					rs12337154	0
					rs13301942	0					rs9298772	0
					rs10963126	0					rs7044823	0
					rs10963127	0					rs7028930	0
					rs3780244	0					rs10125333	0
					rs10963166	0					rs10810764	0
					rs12683178	0					rs10686546	0
					rs7030014	0					rs7865766	0
					rs10435770	0					rs654521	0
					rs78167536	0					rs9298775	0
					rs1028594	0					rs4246136	0
					rs10810801	0					rs10810763	0
					rs11302971	0					rs10756878	0
					rs11791273	0					rs6475147	0
					rs10810811	0					rs7849085	0
					rs13283993	0					rs10810754	0
					rs10810800	0					rs3861711	0
					rs6475151	0					rs10123715	0
					rs9717446	0					rs605916	0
					rs10810803	0					rs670511	0
					rs2441990	0					rs2779778	0
					rs13292977	0					rs2780206	0
					rs1010547	0					rs10122987	0
					rs3808716	0					rs605482	0
					rs3808712	0					rs7037111	0
					rs10810802	0					rs7018705	0
					rs2038511	0					rs10962982	0
					rs2224454	0					rs10046851	0
					rs398113307	0					rs398073456	0
					rs111387904	0					rs4961552	0
					rs145793506	0					rs4961553	0
					rs2754316	0					rs1759454	0
					rs3758217	0					rs10481559	0
					rs9407816	0					rs4424358	0
					rs9407819	0					rs10738474	0
					rs9407817	0					rs2044119	0
					rs2224447	0					rs6475143	0
					rs7350221	0					rs10963063	0
					rs10963209	0					rs7854802	0
					rs10118522	0					rs7870101	0
					rs9406678	0					rs12379104	0
					rs7045693	0					rs10114730	0
					rs3780233	0					rs10119370	0
					rs3780232	0					rs6475141	0
					rs1536065	0					rs6475142	0
					rs2208486	0					rs10120757	0
					rs10963231	0					rs10114688	0
					rs10963234	0					rs7868684	0
					rs10963230	0					rs7868700	0
					rs12238402	0					rs7871926	0
					rs111846957	0					rs7858760	0
					rs77640819	0					rs7858762	0
					rs75771277	0					rs7872831	0
					rs79471635	0					rs4961541	0
					rs75423900	0					rs10810773	0
					rs137997664	0					rs10756874	0
					rs4400483	0					rs10810777	0
					rs4265285	0					rs6475145	0
					rs10738485	0					rs10810769	0
					rs3808711	0					rs10810770	0
					rs10120378	0					rs2779776	0
					rs76726618	0					rs7854818	0
					rs2593371	0					rs10116428	0
					rs3824383	0					rs2044120	0
					rs7031275	0					rs4961540	0
					rs74614115	0					rs1596193	0
					rs2754338	0					rs10810751	0
					rs10963210	0					rs7031133	0
					rs10963146	0					rs7851890	0
					rs2147729	0					rs6475144	0
					rs77074579	0					rs139376119	0
					rs2383044	0					rs7849084	0
					rs10756910	0					rs3808784	0
					rs12380813	0					rs10963027	0
					rs3824387	0					rs7869727	0
					rs12380813	0					rs10119297	0
					rs2038513	0					rs10124487	0
					rs2025559	0					rs10810748	0
					rs67384654	0					rs6475139	0
					rs3808721	0					rs7864919	0
					rs10756896	0					rs4961437	0
					rs10963196	0					rs113101695	0
					rs10810823	0					rs9298773	0
					rs10810824	0					rs632265	0
					rs2593379	0					rs1442516	0
					rs3824384	0					rs2225598	0
					rs1856132	0					rs10756869	0
					rs2208494	0					rs7030452	0
					rs113443502	0					rs10756867	0
					rs79578390	0					rs35917270	0
					rs10810818	0					rs10124513	0
					rs10963191	0					rs4961548	0
					rs3808755	0					rs2990670	0
					rs10810817	0					rs10963057	0
					rs10962556	0					rs3824392	0
					rs55885732	0					rs3824391	0
					rs3808720	0					rs7858530	0
					rs10756899	0					rs2151290	0
					rs3808707	0					rs7873708	0
					rs72718111	0					rs397750534	0
					rs397839335	0					rs10116140	0
					rs2182083	0					rs10756860	0
					rs9407818	0					rs7862069	0
					rs2282072	0					rs7848980	0
					rs3808754	0					rs10448195	0
					rs1337386	0					rs12379102	0
					rs2208487	0					rs10810774	0
					rs113645292	0					rs10756875	0
					rs10810840	0					rs1372702	0
					rs2209429	0					rs10756877	0
					rs3808708	0					rs2099858	0
					rs10810600	0					rs1583987	0
					rs398096303	0					rs1583988	0
					rs12238070	0					rs1583989	0
					rs7858624	0					rs11521161	0
					rs7350278	0					rs10810739	0
					rs4961517	0					rs10283690	0
					rs2025559	0					rs4961439	0
					rs16935912	0					rs397813880	0
					rs2593402	0					rs10738476	0
					rs76972419	0					rs11560448	0
					rs76624530	0					rs10756858	0
					rs72718109	0					rs12236820	0
					rs2593391	0					rs1442523	0
					rs73419969	0					rs7854724	0
					rs10810813	0					rs10810775	0
					rs3808750	0					rs4961542	0
					rs2182082	0					rs2593411	0
					rs10963190	0					rs1442524	0
					rs146575257	0					rs7033974	0
					rs2754311	0					rs7041840	0
					rs1361073	0					rs10123109	0
					rs10738482	0					rs4961545	0
					rs10810602	0					rs4961547	0
					rs10738457	0					rs36057268	0
					rs5016914	0					rs4961557	0
					rs7852041	0					rs10756857	0
					rs3808701	0					rs10962988	0
					rs10810599	0					rs4961555	0
					rs6475166	0					rs10810781	0
					rs3808720	0					rs10121841	0
					rs10810839	0					rs10962950	0
					rs4961584	0					rs9802710	0
					rs1536070	0					rs397732161	0
					rs1536079	0					rs7028779	0
					rs2499060	0					rs10810750	0
					rs4961589	0					rs7038197	0
					rs10738482	0					rs4961544	0
					rs7032090	0					rs869075452	0
					rs58377938	0					rs62558357	0
					rs10756900	0					rs2593387	0
					rs2013982	0					rs1582030	0
					rs11793646	0					rs1591138	0
					rs12000021	0					rs62558297	0
					rs397894527	0					rs10116093	0
					rs79366824	0					rs7470216	0
					rs75379016	0					rs34105027	0
					rs2383040	0					rs3765040	0
					rs10429594	0					rs3780258	0
					rs10115064	0					rs10962916	0
					rs2274215	0					rs10962931	0
					rs2274216	0					rs7038186	0
					rs9407846	0					rs10114662	0
					rs9406730	0					rs10756866	0
					rs2209426	0					rs10963042	0
					rs2209427	0					rs10756855	0
					rs4961595	0					rs7848397	0
					rs2182088	0					rs10810782	0
					TOTAL	0					rs12345267	0
											rs7874453	0
											rs2780198	0
											rs2584554	0
											rs2780199	0
											rs9695844	0
											rs2584553	0
											rs10810786	0
											rs1889114	0
											rs12339564	0
											rs397781541	0
											rs2780197	0
											rs398046453	0
											rs2593415	0
											rs62558996	0
											rs1582031	0
											rs10962947	0
											rs1442533	0
											rs62559022	0
											rs34625442	0
											rs2593412	0
											rs2584535	0
											rs7046933	0
											rs10962907	0
											rs4961559	0
											rs34064391	0
											rs367732860	0
											rs753393	0
											rs1576962	0
											rs7031442	0
											rs12550857	0
											rs10810761	0
											rs1808894	0
											rs7019482	0
											rs2780212	0
											rs10962953	0
											rs10810760	0
											rs10963039	0
											rs141477261	0
											rs10810740	0
											rs7864270	0
											rs13285577	0
											rs13283291	0
											rs62558297	0
											rs1442528	0
											rs10810780	0
											rs2780209	0
											rs61565870	0
											rs34931239	0
											rs58474114	0
											rs1953105	0
											rs2584547	0
											rs13289968	0
											rs1889088	0
											rs10756868	0
											rs13290922	0
											rs34768018	0
											rs62561379	0
											rs13292550	0
											rs10963077	0
											rs10963034	0
											rs10963035	0
											rs10963046	0
											rs62558966	0
											rs10963041	0
											rs12376973	0
											rs10810758	0
											rs11789786	0
											rs34597155	0
											rs10810762	0
											rs10810759	0
											rs10963049	0
											rs62558320	0
											rs13293083	0
											rs12555830	0
											rs13286311	0
											rs7041659	0
											rs62558996	0
											rs4317676	0
											rs2780201	0
											rs35884270	0
											rs10963050	0
											rs11523716	0
											rs13292365	0
											rs12377081	0
											rs10963015	0
											rs17828423	0
											rs17755748	0
											rs34256131	0
											rs1953106	0
											rs10963025	0
											rs7042230	0
											rs10963045	0
											rs10810766	0
											rs10810767	0
											rs10963048	0
											rs10963047	0
											rs10962956	0
											rs10963019	0
											rs62561379	0
											rs10963017	0
											rs13285704	0
											rs7848128	0
											rs11791000	0
											rs13301284	0
											rs12377334	0
											rs1318162	0
											rs12379538	0
											rs13287407	0
											rs2383013	0
											rs10963047	0
											rs369016594	0
											rs10963047	0
											rs71492912	0
											rs36051199	0
											rs4574939	0
											rs10963050	0
											rs10962993	0
											rs11523726	0
											rs894379	0
											rs10963046	0
											rs10963035	0
											rs10810760	0
											rs1442528	0
											rs13293083	0
											rs12156444	0
											rs10963072	0
											rs17829280	0
											rs367907570	0
											rs10963073	0
											rs10963048	0
											rs10963049	0
											rs10963078	0
											rs10810757	0
											rs7848128	0
											rs3808795	0
											rs35968717	0
											rs62558301	0
											rs10963034	0
											rs10963045	0
											rs10810766	0
											rs10810767	0
											rs10963049	0
											rs1442528	0
											rs10756868	0
											rs10756858	0
											rs68056113	0
											rs4375098	0
											rs7864271	0
											rs10963045	0
											rs10810766	0
											rs10810767	0
											rs13289755	0
											rs7041744	0
											rs10810746	0
											rs10963005	0
											rs373542765	0
											rs4626705	0
											rs10963000	0
											rs10963050	0
											rs62558300	0
											rs62561379	0
											rs7028577	0
											rs10963001	0
											rs62559022	0
											rs10963022	0
											rs10810745	0
											rs894379	0
											rs68056113	0
											rs71492912	0
											rs75110373	0
											rs13290659	0
											rs13288652	0
											rs3840729	0
											rs397732161	0
											rs140810883	0
											rs10963048	0
											rs13283291	0
											rs71492912	0
											rs10963078	0
											rs13286365	0
											rs12156444	0
											rs10963069	0
											rs12376505	0
											rs68056113	0
											rs10810776	0
											rs10756857	0
											rs397743400	0
											rs2027014	0
											rs10810760	0
											rs10963035	0
											rs10963046	0
											rs35601090	0
											rs10810758	0
											rs796494963	0
											rs10756868	0
											rs11789741	0
											rs10756856	0
											rs13292380	0
											rs34502029	0
											rs1372703	0
											rs10963034	0
											rs13289670	0
											rs59007332	0
											rs11560448	0
											rs13293083	0
											rs3840729	0
											rs7848128	0
											rs12376938	0
											rs10962959	0
											rs12379655	0
											rs10963031	0
											rs10810755	0
											rs10963040	0
											rs10962988	0
											rs10963030	0
											rs2593414	0
											rs12553068	0
											rs2095156	0
											rs3808795	0
											rs35375281	0
											rs12378677	0
											rs10963060	0
											rs10810772	0
											rs7867175	0
											rs10963077	0
											rs12379655	0
											rs10962944	0
											rs1442517	0
											rs60520802	0
											rs10963065	0
											rs11515075	0
											rs3739490	0
											rs10963018	0
											rs2151342	0
											rs10962931	0
											rs796494963	0
											rs13288642	0
											rs10810743	0
											rs10810780	0
											rs12376505	0
											rs12345267	0
											rs36051199	0
											rs12555618	0
											rs1889114	0
											rs114658868	0
											rs7026852	0
											rs2593382	0
											rs13290659	0
											rs12339564	0
											rs34768018	0
											rs62558320	0
											rs397893175	0
											rs12376938	0
											rs12555618	0
											rs2584554	0
											rs1348278	0
											rs59007332	0
											rs1348278	0
											rs397736711	0
											rs34931239	0
											rs62558354	0
											rs2584537	0
											rs1442517	0
											rs12379104	0
											rs10962958	0
											rs145190003	0
											rs7041840	0
											rs1348278	0
											rs10810757	0
											rs397756102	0
											rs113101695	0
											rs11521161	0
											rs10810786	0
											rs59007332	0
											rs12378677	0
											rs10810776	0
											rs35375281	0
											rs2151342	0
											rs13289670	0
											rs10963060	0
											rs10810772	0
											rs141477261	0
											rs10962959	0
											rs10810757	0
											rs36057268	0
											rs10962994	0
											rs59833414	0
											rs62558357	0
											rs2584535	0
											rs2593412	0
											rs35876302	0
											rs10962996	0
											rs2584553	0
											rs1953105	0
											rs4961557	0
											rs10962998	0
											rs10962999	0
											rs2584536	0
											rs13286311	0
											rs7038186	0
											rs10810758	0
											rs10962916	0
											rs7037111	0
											rs7022060	0
											rs7874453	0
											rs62252889	0
											rs2780197	0
											rs10963073	0
											rs10810761	0
											rs3840727	0
											rs35998538	0
											rs12553516	0
											rs1442533	0
											rs12555618	0
											rs4961559	0
											rs1582030	0
											rs2780199	0
											rs2780201	0
											rs7022060	0
											rs12553068	0
											rs10686546	0
											rs10756878	0
											rs9802710	0
											rs10962944	0
											rs2184063	0
											rs11795325	0
											rs2780212	0
											rs619380	0
											rs10756860	0
											rs13289755	0
											rs10963063	0
											rs7865766	0
											rs10448195	0
											rs10963064	0
											rs10123109	0
											rs7848397	0
											rs7864650	0
											rs1596193	0
											rs1442516	0
											rs10963063	0
											rs6475143	0
											rs7028577	0
											rs34625442	0
											rs139376119	0
											rs35884270	0
											rs7038186	0
											rs10114730	0
											rs10120757	0
											rs10114688	0
											rs6475147	0
											rs7031442	0
											rs4317676	0
											rs2593387	0
											rs7028779	0
											rs7037111	0
											rs2780198	0
											rs4961547	0
											rs10962947	0
											rs10963057	0
											rs2044120	0
											rs2044119	0
											rs4961545	0
											rs10122987	0
											rs4961548	0
											rs10119370	0
											rs6475141	0
											rs6475142	0
											rs10124513	0
											rs6475144	0
											rs10962949	0
											rs2593411	0
											rs62252889	0
											rs13285577	0
											rs1583988	0
											rs1583989	0
											rs2099858	0
											rs1583987	0
											rs62558357	0
											rs1596193	0
											rs3780258	0
											rs7868684	0
											rs7868700	0
											rs7871926	0
											rs7858760	0
											rs7858762	0
											rs7872831	0
											rs4961541	0
											rs10810773	0
											rs10756874	0
											rs10810777	0
											rs6475145	0
											rs10962993	0
											rs10963040	0
											rs10963031	0
											rs10810755	0
											rs2584540	0
											rs398073456	0
											rs4961553	0
											rs4961552	0
											rs10738476	0
											rs1348277	0
											rs10963072	0
											rs2593415	0
											rs4246135	0
											rs7848980	0
											rs11523726	0
											rs10962993	0
											rs10810769	0
											rs10810770	0
											rs10810740	0
											rs10810774	0
											rs4272484	0
											rs35998538	0
											rs10124487	0
											rs1442523	0
											rs2584547	0
											rs10756876	0
											rs4961542	0
											rs10962949	0
											rs62559022	0
											rs3840727	0
											rs1372702	0
											rs10756877	0
											rs10531584	0
											rs10756858	0
											rs10810786	0
											rs1889114	0
											rs12339564	0
											rs12337171	0
											rs1591138	0
											rs11789418	0
											rs12337171	0
											rs10756875	0
											rs2779773	0
											rs2584538	0
											rs10124487	0
											rs10810759	0
											rs10963041	0
											rs62558966	0
											rs10810762	0
											rs12376973	0
											rs10121841	0
											rs12553516	0
											rs4409489	0
											rs35601090	0
											rs10963069	0
											rs1442524	0
											rs796494963	0
											rs397750534	0
											rs593614	0
											rs670058	0
											rs10810781	0
											rs2151290	0
											rs11789418	0
											rs10756855	0
											rs2225598	0
											rs13301284	0
											rs11791000	0
											rs10123745	0
											rs11560448	0
											rs10114662	0
											rs1442516	0
											rs4375098	0
											rs62558996	0
											rs7862069	0
											rs10810775	0
											rs373542765	0
											rs10962958	0
											rs4961439	0
											rs1582031	0
											rs12379538	0
											rs4574939	0
											rs4961555	0
											rs7858530	0
											rs17755748	0
											rs10963019	0
											rs1953106	0
											rs10963025	0
											rs10963000	0
											rs10963001	0
											rs7041744	0
											rs10810745	0
											rs10810746	0
											rs10963005	0
											rs4626705	0
											rs10962955	0
											rs58474114	0
											rs7858530	0
											rs10963030	0
											rs7030452	0
											rs3765040	0
											rs10963065	0
											rs10116140	0
											rs113101695	0
											rs753393	0
											rs605469	0
											rs13287407	0
											rs10114083	0
											rs113101695	0
											rs2584554	0
											rs62252889	0
											rs367907570	0
											rs10756869	0
											rs398113305	0
											rs645117	0
											rs12377334	0
											rs2780209	0
											rs13292380	0
											rs2593411	0
											rs2099858	0
											rs1372703	0
											rs11789741	0
											rs10810751	0
											rs397893175	0
											rs7044462	0
											rs10756860	0
											rs10963039	0
											rs13288652	0
											rs13290659	0
											rs36057268	0
											rs12553068	0
											rs34768018	0
											rs10756876	0
											rs17829280	0
											rs3808784	0
											rs62558320	0
											rs1759441	0
											rs4246136	0
											rs10116428	0
											rs10531584	0
											rs1442531	0
											rs4961539	0
											rs7042230	0
											rs34256131	0
											rs12377081	0
											rs10963015	0
											rs17828423	0
											rs9298775	0
											rs13286311	0
											rs2593387	0
											rs11791463	0
											rs4961540	0
											rs10962955	0
											rs870271	0
											rs34105027	0
											rs10810763	0
											rs4272484	0
											rs10810765	0
											rs10962994	0
											rs869075452	0
											rs10123715	0
											rs7864650	0
											rs10963026	0
											rs2027014	0
											rs10810756	0
											rs10962959	0
											rs3861711	0
											rs10116093	0
											rs10963022	0
											rs11791463	0
											rs1759613	0
											rs11523726	0
											rs7854818	0
											rs1348277	0
											rs13292550	0
											rs10738476	0
											rs595894	0
											rs10119297	0
											rs10963027	0
											rs2095156	0
											rs10481559	0
											rs2584553	0
											rs10046851	0
											rs7849084	0
											rs7849085	0
											rs34105027	0
											rs3840729	0
											rs6475143	0
											rs10962916	0
											rs1889088	0
											rs7865766	0
											rs4574939	0
											rs2027014	0
											rs4574939	0
											rs1759441	0
											rs34064391	0
											rs12376505	0
											rs10810774	0
											rs10963017	0
											rs10114662	0
											rs2044119	0
											rs10756875	0
											rs7851890	0
											rs1759454	0
											rs10810752	0
											rs6475144	0
											rs10756856	0
											rs1348278	0
											rs11521161	0
											rs10756869	0
											rs35968717	0
											rs10119370	0
											rs10963057	0
											rs6475141	0
											rs6475142	0
											rs2383013	0
											rs2593414	0
											rs1442530	0
											rs12345267	0
											rs1372702	0
											rs10756877	0
											rs1583988	0
											rs1583989	0
											rs1583987	0
											rs869075452	0
											rs10124513	0
											rs7848128	0
											rs7874453	0
											rs10962993	0
											rs10962944	0
											rs3808795	0
											rs13290922	0
											rs13289755	0
											rs62558297	0
											rs10810765	0
											rs4424358	0
											rs2044120	0
											rs2151290	0
											rs34502029	0
											rs7848980	0
											rs10963018	0
											rs369016594	0
											rs10756874	0
											rs7028930	0
											rs7854818	0
											rs10810777	0
											rs6475145	0
											rs7868684	0
											rs7868700	0
											rs7871926	0
											rs7858760	0
											rs7858762	0
											rs7872831	0
											rs4961541	0
											rs10810773	0
											rs632265	0
											rs4961548	0
											rs2780197	0
											rs10810764	0
											rs10810748	0
											rs10123715	0
											rs10810775	0
											rs2225598	0
											rs12555830	0
											rs34502029	0
											rs7044823	0
											rs10125333	0
											rs1889088	0
											rs4626705	0
											rs4375098	0
											rs13292365	0
											rs10810749	0
											rs7028779	0
											rs4961540	0
											rs10119297	0
											rs10116428	0
											rs12379655	0
											rs9298772	0
											rs7028930	0
											rs10810739	0
											rs7041840	0
											rs10963000	0
											rs7041744	0
											rs10810746	0
											rs10963005	0
											rs2383013	0
											rs7018705	0
											rs10962982	0
											rs3840729	0
											rs7031133	0
											rs7028593	0
											rs870271	0
											rs593614	0
											rs670058	0
											rs645117	0
											rs4409489	0
											rs1759613	0
											rs10283690	0
											rs12337154	0
											rs7030452	0
											rs1348277	0
											rs397756102	0
											rs10963001	0
											rs10125333	0
											rs10810745	0
											rs367732860	0
											rs10810769	0
											rs10810770	0
											rs35998538	0
											rs7848397	0
											rs2779775	0
											rs35968717	0
											rs2383013	0
											rs11523716	0
											rs9298775	0
											rs10046851	0
											rs9298772	0
											rs7044823	0
											rs10481559	0
											rs4246136	0
											rs10810763	0
											rs13290659	0
											rs7046933	0
											rs4961439	0
											rs397781541	0
											rs2779775	0
											rs10810743	0
											rs10283690	0
											rs9298774	0
											rs2027014	0
											rs2593412	0
											rs2584535	0
											rs10962956	0
											rs12379655	0
											rs3765040	0
											rs10962950	0
											rs10810754	0
											rs34105027	0
											rs34064391	0
											rs61565870	0
											rs10962931	0
											rs34502029	0
											rs4961544	0
											rs10962996	0
											rs10962998	0
											rs10962999	0
											rs35876302	0
											rs2593415	0
											rs373542765	0
											rs35968717	0
											rs10756860	0
											rs397813880	0
											rs7854724	0
											rs1576962	0
											rs10963017	0
											rs62558301	0
											rs4375098	0
											rs1442528	0
											rs9298773	0
											rs4961437	0
											rs10738474	0
											rs1442523	0
											rs397732161	0
											rs4961552	0
											rs6475139	0
											rs12337154	0
											rs145190003	0
											rs13288652	0
											rs13288642	0
											rs10121841	0
											rs2779773	0
											rs7869727	0
											rs10686546	0
											rs10963073	0
											rs12376938	0
											rs4961437	0
											rs10116140	0
											rs141477261	0
											rs34931239	0
											rs11795325	0
											rs10962994	0
											rs2593387	0
											rs10962956	0
											rs11789418	0
											rs7849084	0
											rs7849085	0
											rs3824392	0
											rs3824391	0
											rs2780212	0
											rs7038197	0
											rs7864919	0
											rs2184063	0
											rs6475139	0
											rs397736711	0
											rs7026852	0
											rs10123745	0
											rs398073456	0
											rs4961553	0
											rs7864919	0
											rs7873708	0
											rs35917270	0
											rs1889088	0
											rs13290922	0
											rs35917270	0
											rs605469	0
											rs398113305	0
											rs12377334	0
											rs397743400	0
											rs10810759	0
											rs2593414	0
											rs11523716	0
											rs1442533	0
											rs7470216	0
											rs4961557	0
											rs10963069	0
											rs10962994	0
											rs7854802	0
											rs7870101	0
											rs2584547	0
											rs35968717	0
											rs10963005	0
											rs4626705	0
											rs10963000	0
											rs7041744	0
											rs10810746	0
											rs10810751	0
											rs59007332	0
											rs11791463	0
											rs7873708	0
											rs13292365	0
											rs373542765	0
											rs2780212	0
											rs34625442	0
											rs2383013	0
											rs10810760	0
											rs7854802	0
											rs7870101	0
											rs2184063	0
											rs4961542	0
											rs2780197	0
											rs10962949	0
											rs10120757	0
											rs10114688	0
											rs367732860	0
											rs10810749	0
											rs11515075	0
											rs4961555	0
											rs2593415	0
											rs2593411	0
											rs10810745	0
											rs3861711	0
											rs10963027	0
											rs10962947	0
											rs59833414	0
											rs34625442	0
											rs10810781	0
											rs2780199	0
											rs595894	0
											rs12379102	0
											rs10962953	0
											rs13289968	0
											rs605916	0
											rs2779778	0
											rs2780206	0
											rs645117	0
											rs9298773	0
											rs1953105	0
											rs10810739	0
											rs4961439	0
											rs10963026	0
											rs7037111	0
											rs4961555	0
											rs2779776	0
											rs10114730	0
											rs10963001	0
											rs10810776	0
											rs605482	0
											rs62558300	0
											rs2779773	0
											rs7867175	0
											rs140810883	0
											rs10810752	0
											rs1889088	0
											rs10810713	0
											rs10810750	0
											rs7019482	0
											rs12378677	0
											rs13289670	0
											rs10963060	0
											rs10810772	0
											rs35375281	0
											rs2151342	0
											rs7031133	0
											rs114658868	0
											rs3739490	0
											rs60520802	0
											rs9695844	0
											rs10122987	0
											rs10962950	0
											rs1442524	0
											rs10810758	0
											rs7864650	0
											rs10963018	0
											rs4272484	0
											rs4961539	0
											rs59833414	0
											rs10810732	0
											rs7019482	0
											rs2584553	0
											rs10810754	0
											rs12337171	0
											rs10810750	0
											rs619380	0
											rs11795325	0
											rs10963000	0
											rs7041744	0
											rs10810746	0
											rs10963005	0
											rs4626705	0
											rs13285704	0
											rs13292550	0
											rs7854724	0
											rs10756867	0
											rs10122987	0
											rs1442528	0
											rs10810761	0
											rs10963022	0
											rs397743400	0
											rs10123745	0
											rs4961552	0
											rs4961553	0
											rs398073456	0
											rs2780209	0
											rs12379538	0
											rs10963001	0
											rs10963041	0
											rs12377081	0
											rs10810762	0
											rs10963015	0
											rs17828423	0
											rs17755748	0
											rs10810764	0
											rs670511	0
											rs2990670	0
											rs3824392	0
											rs2584540	0
											rs12376973	0
											rs670058	0
											rs10810759	0
											rs12550857	0
											rs10756857	0
											rs2780201	0
											rs369016594	0
											rs2027014	0
											rs632265	0
											rs34502029	0
											rs10810780	0
											rs7470216	0
											rs10810730	0
											rs9298774	0
											rs2584540	0
											rs10963025	0
											rs34256131	0
											rs7042230	0
											rs1953106	0
											rs7028593	0
											rs2779775	0
											rs4317676	0
											rs7038186	0
											rs593614	0
											rs10962994	0
											rs10963034	0
											rs10963035	0
											rs10963046	0
											rs10962958	0
											rs9298773	0
											rs10114083	0
											rs71492912	0
											rs397736711	0
											rs1759454	0
											rs10810745	0
											rs114658868	0
											rs11515075	0
											rs3739490	0
											rs7867175	0
											rs10962982	0
											rs397750534	0
											rs7018705	0
											rs10963049	0
											rs7033974	0
											rs62558354	0
											rs10124487	0
											rs4317676	0
											rs2184063	0
											rs4375098	0
											rs11789786	0
											rs7873708	0
											rs1759613	0
											rs654521	0
											rs12550857	0
											rs13283291	0
											rs10962998	0
											rs10962999	0
											rs4961559	0
											rs145190003	0
											rs10810786	0
											rs1596193	0
											rs367907570	0
											rs10963041	0
											rs62558300	0
											rs141477261	0
											rs13293083	0
											rs10962996	0
											rs35876302	0
											rs4424358	0
											rs373542765	0
											rs10756867	0
											rs1442524	0
											rs4574939	0
											rs397893175	0
											rs397813880	0
											rs10810754	0
											rs4493994	0
											rs62558297	0
											rs654521	0
											rs7028593	0
											rs10810762	0
											rs62558966	0
											rs1442523	0
											rs13288652	0
											rs10963039	0
											rs2779776	0
											rs6475111	0
											rs36057268	0
											rs605482	0
											rs605916	0
											rs2779778	0
											rs2780206	0
											rs10963063	0
											rs12339564	0
											rs7026852	0
											rs10963045	0
											rs10810766	0
											rs10810767	0
											rs68056113	0
											rs870271	0
											rs3861711	0
											rs10963048	0
											rs1372703	0
											rs10810756	0
											rs10810761	0
											rs10963025	0
											rs10810724	0
											rs10963042	0
											rs12379538	0
											rs60520802	0
											rs12236820	0
											rs3824391	0
											rs10962873	0
											rs10738474	0
											rs397893175	0
											rs1759441	0
											rs7044462	0
											rs7033974	0
											rs1953106	0
											rs4961547	0
											rs7865766	0
											rs2095156	0
											rs9802710	0
											rs11789786	0
											rs13286365	0
											rs7046933	0
											rs10963019	0
											rs12379104	0
											rs34105027	0
											rs3808795	0
											rs10962988	0
											rs62558354	0
											rs35884270	0
											rs62561379	0
											rs62558301	0
											rs11789418	0
											rs753393	0
											rs6475139	0
											rs10756868	0
											rs7044462	0
											rs10810726	0
											rs10810729	0
											rs10962875	0
											rs34597155	0
											rs4409489	0
											rs146032606	0
											rs4961437	0
											rs7041840	0
											rs632265	0
											rs4961557	0
											rs10963047	0
											rs17755748	0
											rs35917270	0
											rs397893175	0
											rs2780198	0
											rs1442524	0
											rs2593411	0
											rs10962944	0
											rs10963082	0
											rs1016100	0
											rs62558966	0
											rs10810780	0
											rs10962907	0
											rs670511	0
											rs2990670	0
											rs13292380	0
											rs2593387	0
											rs2584540	0
											rs3840729	0
											rs7864919	0
											rs10962861	0
											rs10756867	0
											rs12345267	0
											rs654521	0
											rs13301284	0
											rs11791000	0
											rs2584554	0
											rs670511	0
											rs2990670	0
											rs13290659	0
											rs13289968	0
											rs10963050	0
											rs13288642	0
											rs10756866	0
											rs7028577	0
											rs112221208	0
											rs894379	0
											rs2584535	0
											rs3840727	0
											rs112860165	0
											rs2593412	0
											rs13287407	0
											rs13286365	0
											rs12379655	0
											rs2780199	0
											rs1348278	0
											rs34931239	0
											rs397743400	0
											rs10810731	0
											rs10963026	0
											rs10963022	0
											rs36051199	0
											rs10810756	0
											rs10123109	0
											rs7862069	0
											rs7867175	0
											rs10810750	0
											rs114658868	0
											rs4961539	0
											rs397743400	0
											rs12156444	0
											rs13285577	0
											rs605482	0
											rs13289968	0
											rs4961544	0
											rs11789786	0
											rs397813880	0
											rs12377334	0
											rs10123109	0
											rs11795325	0
											rs10962982	0
											rs10114083	0
											rs7026852	0
											rs61565870	0
											rs7851890	0
											rs605916	0
											rs2779778	0
											rs2780206	0
											rs2779776	0
											rs10962998	0
											rs10962999	0
											rs7018705	0
											rs10116140	0
											rs12379104	0
											rs10810782	0
											rs60520802	0
											rs2584537	0
											rs11560448	0
											rs10810733	0
											rs10962996	0
											rs35876302	0
											rs10963017	0
											rs7864270	0
											rs13288642	0
											rs10686546	0
											rs10963073	0
											rs3780258	0
											rs62558354	0
											rs12236820	0
											rs10963018	0
											rs1953105	0
											rs35601090	0
											rs77827357	0
											rs10810748	0
											rs4961557	0
											rs619380	0
											rs4961545	0
											rs3739490	0
											rs1889114	0
											rs3780258	0
											rs2151290	0
											rs10962993	0
											rs10738474	0
											rs34256131	0
											rs7042230	0
											rs10121841	0
											rs1576962	0
											rs13287407	0
											rs1442517	0
											rs10810740	0
											rs13283291	0
											rs595894	0
											rs11789741	0
											rs10756858	0
											rs11791000	0
											rs13301284	0
											rs2095156	0
											rs10756876	0
											rs1348277	0
											rs10962988	0
											rs10962836	0
											rs10114662	0
											rs397732161	0
											rs9298774	0
											rs13292550	0
											rs12376973	0
											rs10756869	0
											rs10756855	0
											rs753393	0
											rs61565870	0
											rs11791463	0
											rs398113305	0
											rs605469	0
											rs10756866	0
											rs12377081	0
											rs10963015	0
											rs17828423	0
											rs13285704	0
											rs10810749	0
											rs10283690	0
											rs1442517	0
											rs10756856	0
											rs11515075	0
											rs369016594	0
											rs1348278	0
											rs34597155	0
											rs10963019	0
											rs1759454	0
											rs10114662	0
											rs13285577	0
											rs10962865	0
											rs7041840	0
											rs7041659	0
											rs79484551	0
											rs111775482	0
											rs10962860	0
											rs77507862	0
											rs1591138	0
											rs1582031	0
											rs1582030	0
											rs10962853	0
											rs12376505	0
											rs10962949	0
											rs10810739	0
											rs1348278	0
											rs10962955	0
											rs1576962	0
											rs146197510	0
											rs113310488	0
											rs10756866	0
											rs10962864	0
											rs6475147	0
											rs2584537	0
											rs7028577	0
											rs11795325	0
											rs10962862	0
											rs12378519	0
											rs10756878	0
											rs10810781	0
											rs11789741	0
											rs10962947	0
											rs7470216	0
											rs2632540	0
											rs10963065	0
											rs7848128	0
											rs10531584	0
											rs11515075	0
											rs10963039	0
											rs10810782	0
											rs4961555	0
											rs113101695	0
											rs10116093	0
											rs10963050	0
											rs1372703	0
											rs2780209	0
											rs10963040	0
											rs77258363	0
											rs7869727	0
											rs12376505	0
											rs62252889	0
											rs7022060	0
											rs17829280	0
											rs367907570	0
											rs76382661	0
											rs12379102	0
											rs13285704	0
											rs12553516	0
											rs2151342	0
											rs10963031	0
											rs10810755	0
											rs3808795	0
											rs2184063	0
											rs62558320	0
											rs2095156	0
											rs10962871	0
											rs10963077	0
											rs2593382	0
											rs10810721	0
											rs1601737	0
											rs10810718	0
											rs10283690	0
											rs10810764	0
											rs140810883	0
											rs34597155	0
											rs367907570	0
											rs10810740	0
											rs76158279	0
											rs1808894	0
											rs10810786	0
											rs34768018	0
											rs59833414	0
											rs13290922	0
											rs10963030	0
											rs10962953	0
											rs10963042	0
											rs3808784	0
											rs10963025	0
											rs13292365	0
											rs10963064	0
											rs7851890	0
											rs7038186	0
											rs13286365	0
											rs10963078	0
											rs10962944	0
											rs10963018	0
											rs10810772	0
											rs12378677	0
											rs10963060	0
											rs10810776	0
											rs35375281	0
											rs13289670	0
											rs2584537	0
											rs10810709	0
											rs10962956	0
											rs62561379	0
											rs10963049	0
											rs11523726	0
											rs12345267	0
											rs34768018	0
											rs62558301	0
											rs12550857	0
											rs62558354	0
											rs2780201	0
											rs10962843	0
											rs10962844	0
											rs10962931	0
											rs12376938	0
											rs7874453	0
											rs1442516	0
											rs114658868	0
											rs3739490	0
											rs60520802	0
											rs17829280	0
											rs2593415	0
											rs10963045	0
											rs10810766	0
											rs10810767	0
											rs12377081	0
											rs10963015	0
											rs17828423	0
											rs7026852	0
											rs10963035	0
											rs10963046	0
											rs62558320	0
											rs10962950	0
											rs2584538	0
											rs2593411	0
											rs10810760	0
											rs10123109	0
											rs12339564	0
											rs10756868	0
											rs9695844	0
											rs7042230	0
											rs34256131	0
											rs10963022	0
											rs35998538	0
											rs12236820	0
											rs34105027	0
											rs7870101	0
											rs35876302	0
											rs10962996	0
											rs148598074	0
											rs4442249	0
											rs10963078	0
											rs10963047	0
											rs10963017	0
											rs61565870	0
											rs10963031	0
											rs10963040	0
											rs2593412	0
											rs62558297	0
											rs10810743	0
											rs2584535	0
											rs7867175	0
											rs10810755	0
											rs10963048	0
											rs11523716	0
											rs398046453	0
											rs1967356	0
											rs17755748	0
											rs12555618	0
											rs10963030	0
											rs397736711	0
											rs10962956	0
											rs3824392	0
											rs10756855	0
											rs71492912	0
											rs2584538	0
											rs113282715	0
											rs10963019	0
											rs263549	0
											rs10962998	0
											rs10962999	0
											rs1953106	0
											rs7854802	0
											rs7854724	0
											rs4961439	0
											rs10810758	0
											rs1808894	0
											rs10121841	0
											rs10810780	0
											rs10962955	0
											rs4961559	0
											rs12156444	0
											rs2584554	0
											rs10810775	0
											rs11523726	0
											rs139376119	0
											rs62558357	0
											rs4424358	0
											rs10756878	0
											rs1442523	0
											rs10810782	0
											rs7848980	0
											rs10810781	0
											rs2780198	0
											rs11789741	0
											rs5896742	0
											rs1160340	0
											rs1442517	0
											rs7031442	0
											rs10963041	0
											rs10756860	0
											rs2593411	0
											rs35884270	0
											rs369016594	0
											rs2099858	0
											rs1372702	0
											rs10756877	0
											rs1583987	0
											rs1583988	0
											rs1583989	0
											rs11521161	0
											rs10963039	0
											rs12555830	0
											rs1318162	0
											rs2584536	0
											rs7033974	0
											rs2780201	0
											rs10448195	0
											rs397756102	0
											rs9695844	0
											rs894379	0
											rs7849085	0
											rs4961548	0
											rs2584547	0
											rs35998538	0
											rs10121841	0
											rs4961555	0
											rs58474114	0
											rs12379102	0
											rs36051199	0
											rs13286365	0
											rs10116093	0
											rs7864270	0
											rs397732161	0
											rs7041659	0
											rs10810757	0
											rs13289968	0
											rs10962959	0
											rs10810774	0
											rs10810759	0
											rs10116093	0
											rs13292380	0
											rs10810781	0
											rs10116140	0
											rs7037111	0
											rs6475147	0
											rs10810727	0
											rs10810728	0
											rs2593414	0
											rs10738476	0
											rs397750534	0
											rs10962879	0
											rs10963072	0
											rs10756875	0
											rs10962852	0
											rs13286311	0
											rs10963064	0
											rs13288642	0
											rs7031442	0
											rs13292380	0
											rs11789786	0
											rs1318162	0
											rs10963065	0
											rs13292550	0
											rs398046453	0
											rs10962855	0
											rs870271	0
											rs34625442	0
											rs62558300	0
											rs4961542	0
											rs13293083	0
											rs6475111	0
											rs62558297	0
											rs13287407	0
											rs10810762	0
											rs13289755	0
											rs10756858	0
											rs12156444	0
											rs35601090	0
											rs10124513	0
											rs62558300	0
											rs10283690	0
											rs263615	0
											rs2151290	0
											rs141477261	0
											rs3824391	0
											rs13289755	0
											rs62558966	0
											rs2780197	0
											rs1442524	0
											rs4317676	0
											rs13286311	0
											rs263611	0
											rs2584554	0
											rs2044119	0
											rs7038186	0
											rs10756857	0
											rs11523716	0
											rs2780199	0
											rs2584553	0
											rs7848397	0
											rs397756102	0
											rs10119370	0
											rs7868684	0
											rs7868700	0
											rs7871926	0
											rs7858760	0
											rs7858762	0
											rs7872831	0
											rs4961541	0
											rs10810773	0
											rs10756874	0
											rs10810777	0
											rs6475145	0
											rs6475141	0
											rs6475142	0
											rs10810770	0
											rs2044120	0
											rs10962916	0
											rs10963027	0
											rs36057268	0
											rs7028779	0
											rs10963034	0
											rs1759613	0
											rs10810751	0
											rs62558301	0
											rs263614	0
											rs7849084	0
											rs6475144	0
											rs13283291	0
											rs2593387	0
											rs13290922	0
											rs68056113	0
											rs670058	0
											rs367732860	0
											rs3765040	0
											rs4409489	0
											rs263624	0
											rs2593411	0
											rs10962958	0
											rs36057268	0
											rs1759441	0
											rs2780198	0
											rs12553516	0
											rs7864271	0
											rs7041840	0
											rs10123109	0
											rs2780212	0
											rs11560448	0
											rs7028930	0
											rs2593382	0
											rs1442516	0
											rs2584536	0
											rs10810725	0
											rs10756860	0
											rs397732161	0
											rs397781541	0
											rs1442517	0
											rs10963077	0
											rs593614	0
											rs62252889	0
											rs34064391	0
											rs12553068	0
											rs7046933	0
											rs10963057	0
											rs12337171	0
											rs1442533	0
											rs6475143	0
											rs7864650	0
											rs870271	0
											rs10810782	0
											rs7862069	0
											rs1372703	0
											rs10963077	0
											rs10962953	0
											rs62558357	0
											rs1442523	0
											rs7018705	0
											rs7864650	0
[truncated: 9,041 more rows]
