# Supplementary material for: Functional Analysis and Fine Mapping of the 9p22.2 Ovarian Cancer Susceptibility Locus
Source: Oxford University Press journal article supplement (doi:10.1158/0008-5472.can-17-3864), 2018-11-28
Supplement: 00085472can173864-sup-194003_3_supp_4928080_pcp4jc.xlsx [file 00085472can173864-sup-194003_3_supp_4928080_pcp4jc.xlsx]

## Sheet: Univariate
SNP	Position	Odds	Ref	Alt	EAFcontrols	EAFcases	r2	NumCalled	OR_1	SE_1	chi2_1	LRT_1	p_LRT	ScoreStat_1	ORnostudies_1	SEnostudies_1	chi2nostudies_1	LRTnostudies_1	ScoreStatnostudies_1
rs3814113	16915021		T	C	0.319932	0.275655	0.99999	40424	-0.23388	0.0192955	146.917	149.617	2.10221e-34	147.554	-0.228504	0.0184915	152.702	155.916	153.336
rs7032221	16914895	1.27125	A	G	0.319857	0.275643	0.998894	40424	-0.233563	0.0193001	146.449	149.137	2.67667e-34	147.082	-0.228318	0.0184966	152.37	155.574	153.001
rs7866677	16909051	1.63477	T	C	0.31964	0.275713	0.977601	40424	-0.233871	0.019357	145.974	148.634	3.44781e-34	146.6	-0.229225	0.0185561	152.598	155.796	153.23
rs4631563	16913286	2.0198	C	A	0.318838	0.274772	0.981419	40424	-0.233394	0.0193452	145.557	148.211	4.26587e-34	146.181	-0.228505	0.0185448	151.827	155.004	152.452
rs10810671	16914835	2.33497	A	C	0.320068	0.276165	0.998587	40424	-0.232663	0.0193035	145.273	147.921	4.93628e-34	145.895	-0.226968	0.018496	150.582	153.717	151.197
rs34131140	16913829	2.59478	A	AT	0.320441	0.276424	0.98532	40424	-0.232168	0.0192748	145.086	147.71	5.48939e-34	145.705	-0.227156	0.0184735	151.199	154.336	151.818
rs10738467	16910677	2.70472	C	T	0.31867	0.274781	0.994876	40424	-0.232777	0.0193333	144.968	147.627	5.72358e-34	145.589	-0.228274	0.0185357	151.667	154.871	152.294
rs6475094	16913616	2.8936	G	A	0.32056	0.276573	0.984362	40424	-0.231932	0.019269	144.879	147.492	6.12602e-34	145.495	-0.226975	0.0184683	151.044	154.17	151.661
rs6475093	16913514	3.02376	G	C	0.32057	0.276597	0.984072	40424	-0.231849	0.0192677	144.794	147.404	6.40347e-34	145.409	-0.226912	0.0184673	150.975	154.098	151.592
rs10738468	16910763	3.08947	A	G	0.318784	0.274992	0.994971	40424	-0.23256	0.0193322	144.713	147.361	6.54358e-34	145.332	-0.227983	0.0185342	151.306	154.493	151.93
rs6475092	16913473	3.10341	G	A	0.320573	0.276608	0.983969	40424	-0.231802	0.0192672	144.744	147.352	6.57329e-34	145.358	-0.226872	0.0184669	150.929	154.05	151.545
rs112442786	16908402	3.88064	CTGGGAGGAAG	C	0.318016	0.274588	0.970105	40424	-0.233653	0.0194514	144.292	146.905	8.23187e-34	144.904	-0.229143	0.0186481	150.988	154.133	151.606
rs113198237	16913171	3.91377	T	TTTG	0.320028	0.276196	0.983849	40424	-0.231709	0.0192899	144.286	146.888	8.30262e-34	144.898	-0.226878	0.0184899	150.562	153.681	151.176
rs4465052	16913043	4.17035	A	G	0.320039	0.276226	0.983913	40424	-0.231584	0.0192877	144.163	146.761	8.85071e-34	144.774	-0.226778	0.0184881	150.459	153.573	151.072
rs4246134	16912988	4.28448	C	T	0.320044	0.276239	0.983961	40424	-0.23153	0.0192867	144.112	146.707	9.09459e-34	144.722	-0.226736	0.0184872	150.417	153.529	151.029
rs55689948	16908169	4.70912	A	G	0.318353	0.275197	0.967537	40424	-0.233523	0.0194657	143.919	146.518	1.00023e-33	144.528	-0.228141	0.0186571	149.527	152.617	150.133
rs7045767	16910898	4.93079	G	C	0.318603	0.274951	0.994309	40424	-0.231783	0.0193287	143.799	146.426	1.04764e-33	144.411	-0.226991	0.0185304	150.054	153.205	150.668
rs4445329	16911757	5.20958	G	A	0.318632	0.274976	0.995647	40424	-0.231648	0.0193244	143.696	146.316	1.10728e-33	144.307	-0.227085	0.0185264	150.243	153.395	150.857
rs4366169	16911638	6.74634	A	C	0.318616	0.275012	0.995136	40424	-0.231271	0.0193268	143.194	145.799	1.43642e-33	143.8	-0.226873	0.0185273	149.947	153.09	150.559
rs7048397	16914703	7.55342	T	C	0.317196	0.273717	0.982609	40424	-0.232296	0.0194265	142.986	145.573	1.6095e-33	143.589	-0.227487	0.0186181	149.294	152.398	149.9
rs10962692	16915874	12.3481	G	C	0.196625	0.1585	0.900951	40424	-0.288027	0.0243448	139.976	144.59	2.63996e-33	140.808	-0.28089	0.0233476	144.74	150.263	145.581
rs12376998	16909002	40.5283	A	T	0.200113	0.160973	0.982113	40424	-0.273765	0.0233151	137.874	142.213	8.73591e-33	138.654	-0.266359	0.022354	141.979	147.149	142.767
rs10962691	16915105	40.6297	C	G	0.201581	0.162501	0.991981	40424	-0.272535	0.0232068	137.916	142.208	8.75792e-33	138.689	-0.263881	0.0222525	140.623	145.664	141.389
rs80039758	16908383	68.2038	C	G	0.199231	0.160485	0.970138	40424	-0.274363	0.0234495	136.893	141.172	1.47547e-32	137.661	-0.266852	0.0224846	140.855	145.946	141.629
rs113780397	16907584	72.1682	G	A	0.307074	0.265598	0.957842	40424	-0.232851	0.0197863	138.492	141.059	1.56186e-32	139.069	-0.228098	0.0189743	144.516	147.605	145.094
rs199782476	16909476	74.4033	A	AGCT	0.200273	0.161507	0.982635	40424	-0.272444	0.0233003	136.72	140.998	1.61057e-32	137.487	-0.263602	0.0223314	139.336	144.348	140.094
c9_pos16900214	16910214	74.9634	A	C	0.200281	0.161224	0.996864	40424	-0.271344	0.0232064	136.718	140.983	1.62278e-32	137.483	-0.263559	0.0222486	140.329	145.386	141.097
rs10810666	16911666	89.8822	C	T	0.199857	0.160888	0.999512	40424	-0.27095	0.0232022	136.371	140.62	1.94821e-32	137.132	-0.263097	0.0222425	139.915	144.951	140.678
rs12377421	16913768	118.037	G	A	0.19838	0.159668	0.973352	40424	-0.273802	0.0234923	135.839	140.075	2.56338e-32	136.595	-0.266436	0.0225157	140.029	145.081	140.793
rs181552334	16907646	118.274	A	G	0.279048	0.241051	0.890281	40424	-0.248661	0.0212203	137.313	140.071	2.56855e-32	137.904	-0.240438	0.0203508	139.586	142.786	140.15
rs10810665	16911400	136.251	G	A	0.199666	0.160825	0.997706	40424	-0.270427	0.0232253	135.574	139.788	2.96192e-32	136.328	-0.262742	0.0222645	139.262	144.264	140.019
rs12377389	16913557	158.539	C	T	0.200042	0.161304	0.985369	40424	-0.270542	0.0232606	135.278	139.485	3.45012e-32	136.03	-0.262661	0.0223002	138.731	143.713	139.483
rs10810668	16912435	176.003	G	C	0.200055	0.16132	0.998372	40424	-0.269555	0.0231915	135.094	139.276	3.833e-32	135.841	-0.261175	0.0222316	138.013	142.935	138.755
rs10810669	16912661	240.087	C	T	0.200204	0.161507	0.996626	40424	-0.269117	0.0232043	134.507	138.655	5.24015e-32	135.248	-0.26137	0.0222457	138.045	142.965	138.787
rs62543619	16914716	254.933	G	A	0.197911	0.159705	0.971593	40424	-0.273048	0.023556	134.362	138.535	5.56656e-32	135.106	-0.26515	0.0225871	137.804	142.745	138.547
rs10810670	16912663	264.807	C	T	0.200189	0.161507	0.996593	40424	-0.268921	0.0232035	134.32	138.459	5.78373e-32	135.058	-0.261242	0.0222452	137.915	142.828	138.656
rs62543618	16914578	330.465	C	T	0.197107	0.15897	0.97137	40424	-0.27309	0.0236049	133.847	138.016	7.2292e-32	134.589	-0.265567	0.0226336	137.67	142.629	138.415
rs10124837	16891647	431.385	C	T	0.761049	0.80045	0.973106	40424	0.2511	0.0216877	134.05	137.483	9.45492e-32	134.698	0.24473	0.0207979	138.464	142.568	139.109
rs10962662	16889937	672.499	C	A	0.236414	0.196601	0.994407	40424	-0.249108	0.0215837	133.205	136.595	1.47867e-31	133.844	-0.244084	0.0207034	138.994	143.12	139.645
rs10756823	16878616	749.57	C	A	0.238598	0.199058	0.980786	40424	-0.248561	0.0215519	133.014	136.378	1.64943e-31	133.648	-0.242179	0.0206677	137.306	141.334	137.939
rs72117843	16907999	1089.53	TTA	T	0.223814	0.185887	0.93231	40424	-0.260918	0.0226991	132.127	135.63	2.40401e-31	132.774	-0.254629	0.0217726	136.772	140.979	137.422
c9_pos16896889	16906889	2320.41	T	C	0.197352	0.1599	0.993201	40424	-0.266542	0.0233638	130.151	134.118	5.14829e-31	130.849	-0.258123	0.0223951	132.846	137.522	133.539
rs77795022	16907997	2391.08	T	G	0.217911	0.180476	0.925064	40424	-0.263092	0.0230295	130.511	134.058	5.30625e-31	131.157	-0.256229	0.0220962	134.468	138.702	135.113
rs117224476	16907967	3646.42	T	G	0.217443	0.180184	0.924561	40424	-0.262567	0.0230562	129.689	133.214	8.1173e-31	130.33	-0.255859	0.0221229	133.757	137.971	134.397
rs72713890	16906510	5300.2	G	C	0.195806	0.158814	0.982406	40424	-0.266518	0.0235066	128.55	132.466	1.18316e-30	129.236	-0.258042	0.0225338	131.132	135.744	131.811
c9_pos16894635	16904635	5464.35	C	G	0.198429	0.161107	0.994691	40424	-0.263814	0.0232687	128.543	132.405	1.22008e-30	129.221	-0.254766	0.0223115	130.384	134.894	131.047
rs10962670	16896588	6288.64	C	T	0.197253	0.160424	0.978152	40424	-0.265464	0.0234443	128.215	132.124	1.40559e-30	128.9	-0.254985	0.022478	128.681	133.167	129.335
rs10962665	16891590	6977.88	A	G	0.193986	0.157039	0.965804	40424	-0.269187	0.0237936	127.994	131.916	1.56086e-30	128.677	-0.262144	0.0228087	132.092	136.797	132.783
c9_pos16889285	16899285	8888.38	T	C	0.19957	0.162459	0.991452	40424	-0.262375	0.0232235	127.64	131.432	1.99182e-30	128.304	-0.252185	0.022266	128.279	132.644	128.917
rs34606230	16903362	9696.3	A	T	0.197238	0.16031	0.977238	40424	-0.264463	0.0234314	127.389	131.258	2.17429e-30	128.066	-0.255272	0.0224676	129.09	133.598	129.749
rs10962664	16891561	10813	T	C	0.196829	0.159732	0.980302	40424	-0.264343	0.0234399	127.182	131.04	2.42667e-30	127.855	-0.256224	0.0224781	129.933	134.488	130.599
rs62543579	16905170	13487.2	T	C	0.196201	0.159311	0.98348	40424	-0.264131	0.0234607	126.753	130.598	3.03188e-30	127.422	-0.256144	0.0224903	129.712	134.26	130.378
rs139327399	16906238	15153.7	AC	A	0.196744	0.159813	0.987875	40424	-0.26309	0.0233861	126.559	130.365	3.40949e-30	127.222	-0.255086	0.0224193	129.457	133.959	130.117
c9_pos16896152	16906152		A	G	0.197166	0.160178	0.993561	40424	-0.262484	0.0233441	126.43	130.214	3.67898e-30	127.089	-0.254665	0.0223796	129.489	133.975	130.147
rs62543581	16906006		C	A	0.196336	0.159486	0.986496	40424	-0.263287	0.0234285	126.29	130.099	3.89841e-30	126.952	-0.255378	0.0224597	129.288	133.798	129.948
c9_pos16896307	16906307		A	G	0.197114	0.160187	0.993462	40424	-0.262266	0.0233472	126.187	129.959	4.1833e-30	126.844	-0.254295	0.0223817	129.088	133.552	129.742
c9_pos16896094	16906094		C	T	0.197106	0.160191	0.993586	40424	-0.262155	0.0233455	126.098	129.865	4.38617e-30	126.753	-0.25419	0.0223802	129	133.458	129.653
rs10962643	16857403		C	A	0.312701	0.271256	0.976602	40424	-0.218471	0.0194967	125.564	127.746	1.27567e-29	126.042	-0.214283	0.0186861	131.504	134.166	131.986
rs10962693	16916693		T	C	0.696228	0.734488	0.852827	40424	0.232802	0.020785	125.451	127.73	1.286e-29	125.936	0.22973	0.0199352	132.798	135.617	133.297
rs10962666	16892272		G	A	0.199611	0.16311	0.987632	40424	-0.257614	0.0232373	122.904	126.471	2.4252e-29	123.521	-0.249987	0.0222922	125.756	129.984	126.369
rs10962679	16905441		T	C	0.74665	0.784496	0.977593	40424	0.233202	0.0210965	122.193	124.921	5.29617e-29	122.704	0.224329	0.0202037	123.285	126.435	123.772
rs4961501	16851678		T	G	0.750968	0.788832	0.960054	40424	0.234649	0.0213861	120.386	123.118	1.31397e-28	120.894	0.229715	0.0204975	125.597	128.936	126.111
rs7046326	16847520		G	A	0.246033	0.207203	0.995887	40424	-0.231816	0.0211767	119.831	122.531	1.76634e-28	120.333	-0.228068	0.0203147	126.04	129.394	126.558
rs7868157	16851977		C	A	0.759026	0.797486	0.978274	40424	0.234504	0.0214313	119.73	122.523	1.77347e-28	120.244	0.232056	0.0205555	127.447	130.972	127.988
rs10810647	16853779		C	T	0.755985	0.793936	0.983948	40424	0.229766	0.0212598	116.803	119.428	8.4404e-28	117.285	0.226348	0.0203895	123.237	126.51	123.737
rs10756819	16858084		G	A	0.66694	0.707225	0.999979	40424	0.201991	0.01894	113.737	115.378	6.50397e-27	114.11	0.199357	0.0181452	120.709	122.75	121.095
rs7851204	16909110		A	G	0.399735	0.366689	0.972889	40424	-0.179056	0.0181252	97.592	98.4603	3.31606e-23	97.8427	-0.167376	0.017333	93.247	94.1312	93.4571
rs10465044	16911665		A	C	0.599301	0.632011	0.977456	40424	0.177056	0.0180741	95.9638	96.8036	7.65568e-23	96.206	0.1651	0.0172839	91.2459	92.0943	91.4469
rs74664507	16913836		T	A	0.580468	0.613263	0.952641	40424	0.175782	0.0180324	95.0265	95.7335	1.31437e-22	95.2596	0.165859	0.0172324	92.6367	93.3689	92.8398
rs12376099	16889023		G	A	0.145391	0.118615	0.946066	40424	-0.255675	0.0269435	90.0466	92.9016	5.49601e-22	90.4725	-0.242108	0.0258488	87.7279	90.8848	88.1173
rs10962659	16883318		G	C	0.151527	0.123991	0.983539	40424	-0.246131	0.0259473	89.9805	92.7637	5.89261e-22	90.395	-0.231913	0.0248853	86.8492	89.8906	87.2221
rs10962658	16881346		G	A	0.152498	0.12501	0.98457	40424	-0.244704	0.0258615	89.5316	92.277	7.5355e-22	89.9392	-0.230152	0.0247993	86.1296	89.1148	86.4944
rs62541927	16888222		C	G	0.145652	0.119194	0.945261	40424	-0.254264	0.0269175	89.228	92.0329	8.52474e-22	89.6447	-0.239004	0.0258141	85.7227	88.7564	86.0933
rs140047332	16877723		GC	G	0.151743	0.124278	0.993395	40424	-0.24302	0.0257809	88.8557	91.5636	1.08063e-21	89.2565	-0.228634	0.0247232	85.5214	88.4688	85.8806
rs62541926	16877423		T	C	0.151726	0.124264	0.992432	40424	-0.24306	0.0257878	88.8379	91.5453	1.09067e-21	89.2387	-0.228736	0.0247303	85.5484	88.4979	85.9079
rs10962653	16876736		T	C	0.151686	0.124233	0.990602	40424	-0.243105	0.0258027	88.7683	91.4735	1.13097e-21	89.1688	-0.228935	0.0247458	85.59	88.5432	85.9501
c9_pos16875464	16885464		A	G	0.152067	0.12449	0.996063	40424	-0.242492	0.0257576	88.6307	91.3152	1.22516e-21	89.0281	-0.229063	0.0247069	85.9556	88.9148	86.3172
rs10962656	16877788		G	A	0.152141	0.124966	0.999142	40424	-0.241801	0.0256877	88.6067	91.2849	1.24406e-21	89.002	-0.225617	0.0246293	83.9152	86.7603	84.259
rs11789875	16872323		G	A	0.151976	0.124621	0.98486	40424	-0.24222	0.0258467	87.8233	90.4775	1.87092e-21	88.2156	-0.22897	0.024795	85.2766	88.2096	85.6339
rs200648906	16871360		C	CG	0.152102	0.124745	0.982157	40424	-0.242359	0.0258656	87.7954	90.448	1.89903e-21	88.1878	-0.229429	0.0248146	85.4839	88.4283	85.843
rs62541923	16870501		C	A	0.152329	0.124972	0.980719	40424	-0.242271	0.0258687	87.7105	90.3575	1.98791e-21	88.1021	-0.229605	0.0248177	85.5933	88.5422	85.9531
rs62541922	16870182		T	C	0.152264	0.12491	0.981407	40424	-0.242016	0.0258642	87.5564	90.1956	2.15741e-21	87.9467	-0.229491	0.0248136	85.5363	88.4818	85.8955
rs56225911	16907952		T	A	0.590875	0.619329	0.712243	40424	0.199985	0.0211663	89.2702	90.0275	2.34873e-21	89.485	0.186921	0.0202405	85.2859	86.0459	85.4634
rs10962652	16874878		A	G	0.150438	0.123337	0.979545	40424	-0.243174	0.0260382	87.2193	89.8558	2.56167e-21	87.6065	-0.229956	0.0249688	84.8196	87.7374	85.174
rs201591113	16874877		A	AG	0.150438	0.123337	0.979545	40424	-0.243171	0.0260382	87.2171	89.8535	2.56464e-21	87.6043	-0.229954	0.0249688	84.8176	87.7353	85.172
rs10962649	16873535		C	T	0.152419	0.125084	0.995503	40424	-0.239696	0.0257167	86.8743	89.4666	3.11859e-21	87.2551	-0.226478	0.024666	84.3058	87.1685	84.6529
c9_pos16895922	16905922		G	A	0.197483	0.161336	0.999174	28728	-0.253522	0.0271857	86.9658	89.3799	3.2583e-21	87.4004	-0.254143	0.0261355	94.557	97.7501	95.0373
c9_pos16853364	16863364		T	C	0.597874	0.628336	0.998098	40424	0.168897	0.0179735	88.3035	89.0397	3.86968e-21	88.5092	0.155206	0.0171866	81.5521	82.265	81.7131
rs10962638	16846111		G	A	0.158574	0.131063	0.961019	40424	-0.235655	0.0256896	84.1472	86.5479	1.36393e-20	84.498	-0.225579	0.0246369	83.8346	86.593	84.1685
rs9697099	16907621		T	A	0.649338	0.676926	0.878348	40424	0.181285	0.0196344	85.2488	86.1067	1.70484e-20	85.4483	0.166436	0.0187894	78.4641	79.3071	78.6195
rs1339552	16848790		C	T	0.403419	0.373292	0.995337	40424	-0.165292	0.0179683	84.6233	85.2986	2.56545e-20	84.8117	-0.153727	0.0171974	79.9051	80.587	80.0595
rs1416742	16856883		G	A	0.594741	0.624528	0.996726	40424	0.164585	0.017921	84.3445	85.0109	2.96725e-20	84.5314	0.151006	0.0171415	77.6053	78.2482	77.7508
rs2153271	16864521		C	T	0.595047	0.624879	0.999959	40424	0.164712	0.0179377	84.3177	84.9856	3.00546e-20	84.5048	0.151563	0.017145	78.1476	78.7977	78.2951
rs12379183	16865699		A	G	0.227645	0.196888	0.999753	40424	-0.196076	0.0215569	82.7325	84.3312	4.18459e-20	82.9819	-0.189289	0.0206649	83.9039	85.7927	84.1444
rs10962647	16868380		T	G	0.160211	0.132828	0.995862	40424	-0.225755	0.0249996	81.547	83.8057	5.45872e-20	81.8717	-0.216034	0.0239812	81.1527	83.7432	81.4624
rs10962668	16894140		T	C	0.600984	0.630266	0.995348	40424	0.163723	0.0179907	82.8178	83.4895	6.40553e-20	82.9991	0.150632	0.0172067	76.6369	77.2912	76.7794
rs62541877	16852453		G	A	0.159178	0.132268	0.978882	40424	-0.228024	0.0253117	81.1555	83.395	6.71917e-20	81.4795	-0.218669	0.0242767	81.1329	83.7295	81.4432
rs12379687	16854367		G	T	0.159438	0.132221	0.999783	40424	-0.226053	0.0250934	81.1524	83.3675	6.8133e-20	81.4725	-0.217217	0.024069	81.446	84.0314	81.7557
rs35194519	16898793		AT	A	0.599646	0.628893	0.977606	40424	0.163299	0.0179823	82.4666	83.1107	7.75846e-20	82.6448	0.150763	0.0171974	76.8536	77.4878	76.996
rs62541879	16861508		A	G	0.1582	0.13129	0.986247	40424	-0.227269	0.0252916	80.7471	82.9794	8.2913e-20	81.0685	-0.217633	0.0242598	80.4775	83.0497	80.7836
rs62541878	16861205		A	T	0.158204	0.131309	0.985491	40424	-0.227182	0.0252947	80.6653	82.8944	8.6556e-20	80.9861	-0.217573	0.0242623	80.4161	82.9856	80.7217
c9_pos16855291	16865291		G	A	0.159315	0.132199	0.998742	40424	-0.225486	0.0251046	80.6736	82.8742	8.74451e-20	80.99	-0.216127	0.024082	80.5441	83.0886	80.8472
rs11792249	16864076		A	G	0.159387	0.132324	0.998703	40424	-0.225427	0.0251026	80.6446	82.841	8.89262e-20	80.9603	-0.215633	0.0240785	80.1998	82.7243	80.5
rs10962672	16898119		G	A	0.598591	0.627686	0.981053	40424	0.162369	0.0179496	81.8267	82.456	1.08049e-19	82.0019	0.149815	0.0171664	76.1643	76.7818	76.3039
rs28498684	16900695		A	G	0.600707	0.629942	0.995294	40424	0.162621	0.0179878	81.7336	82.3885	1.11802e-19	81.9101	0.150641	0.0172027	76.6815	77.335	76.8241
rs10962645	16863543		A	C	0.159901	0.133168	0.980475	40424	-0.22593	0.0252409	80.1195	82.307	1.16509e-19	80.4334	-0.216274	0.0242114	79.7936	82.3116	80.0921
rs36116821	16900765		C	T	0.600995	0.630239	0.995136	40424	0.162589	0.0179938	81.6459	82.3003	1.16904e-19	81.8221	0.150857	0.0172092	76.8438	77.5007	76.987
rs10962648	16868958		G	C	0.159404	0.132448	0.996003	40424	-0.224691	0.0251141	80.0453	82.2157	1.22017e-19	80.3563	-0.214947	0.0240912	79.6062	82.1019	79.9018
rs11788047	16858569		G	A	0.157994	0.131264	0.983667	40424	-0.226385	0.0253233	79.9203	82.1229	1.27882e-19	80.2367	-0.216998	0.0242862	79.8352	82.3845	80.1375
rs3927680	16887366		T	A	0.600894	0.629778	0.996071	40424	0.161841	0.0179786	81.0333	81.6797	1.60029e-19	81.2068	0.149262	0.017192	75.3782	76.0144	75.516
rs7040151	16881373		C	T	0.599423	0.628289	0.984578	40424	0.161334	0.0179468	80.8124	81.4399	1.80673e-19	80.9839	0.148855	0.0171605	75.2431	75.86	75.3798
rs10738466	16903366		G	A	0.60124	0.630348	0.978669	40424	0.161857	0.0180176	80.699	81.3323	1.90783e-19	80.8705	0.150832	0.0172312	76.6227	77.2672	76.7647
rs7861573	16862280		A	G	0.774098	0.804231	0.999862	40424	0.193074	0.0216138	79.7969	81.3162	1.92343e-19	80.0298	0.185869	0.0207108	80.5411	82.3239	80.7639
rs12345776	16881877		C	A	0.600767	0.629619	0.996476	40424	0.16125	0.0179742	80.4826	81.1213	2.1228e-19	80.6537	0.148897	0.0171871	75.0533	75.6842	75.1899
rs10122763	16878493		G	A	0.599467	0.628224	0.981636	40424	0.160945	0.0179551	80.3491	80.968	2.29402e-19	80.5185	0.148448	0.017167	74.7761	75.3838	74.911
rs4644350	16882916		C	G	0.600846	0.629521	0.981786	40424	0.161049	0.0179716	80.3054	80.9401	2.32664e-19	80.4755	0.148571	0.0171852	74.7404	75.3658	74.8758
rs10810652	16876283		G	A	0.598586	0.62716	0.979242	40424	0.16033	0.0179421	79.8512	80.4578	2.9698e-19	80.0182	0.147772	0.0171544	74.2045	74.7989	74.3371
rs10810655	16877138		G	C	0.598774	0.627336	0.980796	40424	0.160133	0.01794	79.6735	80.2784	3.25205e-19	79.8398	0.147549	0.0171522	73.9994	74.5915	74.1313
rs10962642	16857292		G	T	0.160744	0.134247	0.975883	40424	-0.221653	0.0251973	77.3815	79.4442	4.96039e-19	77.675	-0.2131	0.0241626	77.7817	80.193	78.0651
rs10962650	16874612		C	T	0.596483	0.625094	0.97946	40424	0.159091	0.0179191	78.8245	79.4078	5.05262e-19	78.9868	0.147316	0.0171305	73.9536	74.5339	74.085
rs10810657	16884586		T	A	0.605602	0.633788	0.995878	40424	0.158876	0.0179171	78.6294	79.2681	5.42283e-19	78.7933	0.146332	0.0171312	72.9626	73.5955	73.0927
rs10810650	16873551		C	T	0.598459	0.62714	0.995558	40424	0.158969	0.0179606	78.3403	78.9411	6.39896e-19	78.5021	0.147868	0.0171729	74.1411	74.7499	74.2741
rs12338590	16886392		T	C	0.50295	0.528877	0.742011	40424	0.180012	0.0203352	78.362	78.7652	6.99485e-19	78.5231	0.167222	0.0194321	74.0534	74.4352	74.183
rs7025549	16881256		T	G	0.630788	0.658464	0.947327	40424	0.163651	0.018681	76.7421	77.4594	1.35479e-18	76.9037	0.153422	0.0178688	73.7196	74.4755	73.8564
rs183993950	16907676		A	G	0.0346483	0.0260877	0.399918	40424	-0.745004	0.0880031	71.6672	77.4041	1.39326e-18	72.7139	-0.746108	0.0845983	77.7822	85.1741	78.8671
rs76718132	16907675		C	T	0.0347877	0.0262943	0.399008	40424	-0.73869	0.0877745	70.8253	76.4166	2.29712e-18	71.8426	-0.739046	0.0843744	76.7222	83.9124	77.7726
rs12350739	16885017		G	A	0.591988	0.619407	0.993061	40424	0.156207	0.0179377	75.8346	76.3766	2.34413e-18	75.9856	0.145759	0.0171471	72.2591	72.8143	72.3847
rs1339548	16846323		T	C	0.331174	0.303207	0.999981	40424	-0.161475	0.018825	73.577	74.3697	6.47756e-18	73.7315	-0.149441	0.0180114	68.8403	69.6528	68.9653
rs1339547	16846260		A	T	0.330729	0.30299	0.998408	40424	-0.161037	0.0188465	73.011	73.7946	8.66834e-18	73.1632	-0.148937	0.0180301	68.2352	69.038	68.3582
rs10962641	16849604		G	A	0.333945	0.307037	0.978318	40424	-0.161365	0.018911	72.8102	73.5796	9.66585e-18	72.9609	-0.149176	0.0180831	68.0537	68.8411	68.1753
rs10810645	16845726		A	G	0.62384	0.650612	0.973746	40424	0.155505	0.018453	71.016	71.6002	2.6353e-17	71.1526	0.145967	0.0176525	68.3751	68.9977	68.4912
rs13300853	16901228		C	T	0.361055	0.334168	0.979526	40424	-0.155181	0.0184455	70.778	71.4177	2.89067e-17	70.9156	-0.141645	0.0176425	64.4587	65.0813	64.5639
rs62543565	16901067		C	A	0.634358	0.660901	0.971275	40424	0.154687	0.0184506	70.2895	70.9051	3.74828e-17	70.4242	0.14074	0.0176439	63.6284	64.221	63.7302
rs10810661	16903850		A	G	0.683487	0.710177	0.976319	40424	0.15936	0.0192087	68.8279	69.5973	7.27364e-17	68.9668	0.147377	0.0183774	64.312	65.102	64.4241
rs12344726	16905328		G	A	0.664601	0.690222	0.988252	40424	0.15088	0.0187117	65.0191	65.6458	5.39699e-16	65.1382	0.135878	0.0178925	57.6707	58.2611	57.7576
rs7032420	16904202		A	G	0.665816	0.6914	0.999008	40424	0.15079	0.0187442	64.7161	65.349	6.27418e-16	64.835	0.13609	0.017925	57.6411	58.2417	57.7284
rs7033084	16904641		C	T	0.665645	0.691311	0.991802	40424	0.15076	0.0187418	64.7068	65.3379	6.30961e-16	64.8256	0.136276	0.0179211	57.8244	58.4261	57.9121
rs7032175	16904080		A	G	0.665648	0.691258	0.998888	40424	0.15066	0.0187393	64.6382	65.2695	6.53246e-16	64.7568	0.136114	0.0179211	57.6871	58.288	57.7745
rs7032581	16904355		A	G	0.665837	0.691385	0.998998	40424	0.150667	0.018744	64.6112	65.2425	6.62258e-16	64.7297	0.13591	0.0179247	57.4908	58.0889	57.5776
rs10756835	16904948		A	C	0.665926	0.691632	0.999178	40424	0.150699	0.0187499	64.5985	65.2297	6.66573e-16	64.717	0.136328	0.0179298	57.8123	58.4158	57.9001
c9_pos16894303	16904303		G	A	0.665815	0.691364	0.99904	40424	0.150602	0.0187438	64.5579	65.1881	6.80794e-16	64.6762	0.135906	0.0179245	57.4891	58.087	57.5759
rs7029285	16903948		G	A	0.66569	0.691264	0.998243	40424	0.150565	0.0187432	64.5296	65.1593	6.90817e-16	64.6478	0.136035	0.0179249	57.5956	58.1951	57.6827
rs7033194	16904705		C	T	0.665881	0.691424	0.99924	40424	0.150318	0.0187483	64.2827	64.9088	7.8446e-16	64.4001	0.135901	0.0179277	57.4646	58.0619	57.5513
rs7033061	16904496		G	A	0.665804	0.691281	0.999117	40424	0.150271	0.0187432	64.2782	64.9037	7.86493e-16	64.3955	0.135575	0.0179237	57.2137	57.8068	57.2996
rs7868583	16906359		G	A	0.666204	0.691588	0.996308	40424	0.150547	0.0187812	64.254	64.8802	7.95928e-16	64.3713	0.135684	0.0179578	57.0887	57.6807	57.1744
rs7033354	16904846		C	T	0.665807	0.691345	0.999968	40424	0.150189	0.018741	64.2232	64.8483	8.08918e-16	64.3404	0.135729	0.0179204	57.3653	57.9608	57.4517
rs7032644	16904141		G	A	0.665979	0.691384	0.998985	40424	0.149967	0.0187413	64.0309	64.6536	8.9293e-16	64.1474	0.135253	0.0179216	56.9562	57.546	57.0414
rs12551733	16895578		C	G	0.280812	0.256466	0.992759	40424	-0.153214	0.019858	59.5288	60.2456	8.37298e-15	59.6391	-0.137071	0.0189918	52.0906	52.7625	52.1696
rs4961503	16902524		G	A	0.278058	0.253891	0.976907	40424	-0.153483	0.0199858	58.9761	59.7003	1.1046e-14	59.0861	-0.138413	0.0191166	52.4245	53.1199	52.5055
rs10810662	16905615		T	A	0.649468	0.672523	0.9096	40424	0.146009	0.0192922	57.2792	57.7821	2.92822e-14	57.372	0.131171	0.0184575	50.504	50.9734	50.5705
rs4961498	16843013		C	A	0.331244	0.30639	0.986012	40424	-0.142943	0.018916	57.1041	57.6283	3.16637e-14	57.1976	-0.139001	0.0181097	58.9132	59.5421	59.0046
rs151195704	16858725		TC	T	0.382342	0.40345	0.701802	40424	0.1601	0.0210793	57.6854	57.5788	3.24707e-14	57.7769	0.160707	0.0201476	63.6242	63.4325	63.7253
rs10962680	16905824		C	T	0.348031	0.364842	0.590315	40424	0.16234	0.0233509	48.3327	48.2025	3.84398e-12	48.3994	0.148433	0.0222935	44.3307	44.1647	44.3811
rs10962681	16905827		T	G	0.348031	0.364842	0.590316	40424	0.162339	0.0233509	48.3324	48.2022	3.84457e-12	48.3991	0.148431	0.0222935	44.3297	44.1637	44.3801
rs1934282	16836724		C	G	0.630793	0.648393	0.642407	40424	0.155228	0.022702	46.7534	47.062	6.87763e-12	46.8143	0.146652	0.0217078	45.64	45.9759	45.6926
rs75998941	16845313		CT	C	0.156285	0.142894	0.787842	40424	-0.176273	0.0277269	40.4171	41.1465	1.41236e-10	40.4975	-0.157434	0.0265565	35.1444	35.8361	35.2023
rs13297036	16900573		T	C	0.451531	0.469116	0.479091	40424	0.16061	0.0253475	40.149	40.2074	2.28382e-10	40.193	0.166982	0.0242019	47.6036	47.6754	47.6581
rs13296061	16900577		G	A	0.451532	0.469116	0.479087	40424	0.160606	0.0253476	40.1463	40.2047	2.28697e-10	40.1903	0.166978	0.024202	47.6007	47.6725	47.6552
rs13295768	16900567		C	T	0.451081	0.468526	0.480168	40424	0.159474	0.0253207	39.6668	39.7233	2.92614e-10	39.7097	0.165906	0.0241762	47.0923	47.1618	47.1457
rs10962640	16849464		C	G	0.248021	0.232648	0.971221	40424	-0.12752	0.0207447	37.7866	38.1905	6.4164e-10	37.8345	-0.109126	0.0198375	30.2613	30.5978	30.2902
rs62541876	16844653		C	T	0.121945	0.106643	0.918176	40424	-0.176801	0.0289084	37.4041	38.1805	6.44937e-10	37.4866	-0.164158	0.0277736	34.9349	35.7594	35.0046
rs17744040	16842137		T	C	0.123742	0.108655	0.936366	40424	-0.174004	0.0284596	37.3819	38.1462	6.56374e-10	37.463	-0.158547	0.0273409	33.6269	34.3937	33.6905
rs6475084	16841349		A	T	0.876491	0.891548	0.93673	40424	0.173315	0.0284833	37.0246	37.7781	7.92667e-10	37.1041	0.15895	0.027365	33.7388	34.5095	33.8028
c9_pos16831757	16841757		A	G	0.123642	0.10878	0.937549	40424	-0.171368	0.0284449	36.2952	37.023	1.16744e-09	36.3714	-0.155897	0.0273234	32.5539	33.2811	32.6134
rs4961499	16844949		G	A	0.876139	0.891508	0.927659	40424	0.171576	0.0286225	35.9337	36.651	1.41287e-09	36.0085	0.161567	0.0275049	34.505	35.3009	34.5718
rs12377036	16933700		T	C	0.102843	0.0841227	0.998653	40424	-0.182673	0.0307834	35.2142	36.0465	1.92665e-09	35.3003	-0.185945	0.029446	39.8763	41.066	39.9849
rs10962724	16932860		C	T	0.102028	0.0834385	0.989832	40424	-0.183742	0.0309977	35.1364	35.9721	2.00163e-09	35.2229	-0.187169	0.0296524	39.8425	41.039	39.9518
rs79603776	16932537		C	T	0.102112	0.083533	0.989591	40424	-0.183383	0.0309731	35.0547	35.8865	2.09153e-09	35.1407	-0.186769	0.0296297	39.7331	40.9234	39.8417
rs10962723	16932086		C	G	0.102763	0.0841399	0.998427	40424	-0.181909	0.0307836	34.9197	35.7408	2.25394e-09	35.0043	-0.185017	0.0294502	39.4682	40.6385	39.5747
rs117255122	16930305		G	C	0.102247	0.0837605	0.98423	40424	-0.183272	0.0310329	34.8775	35.7038	2.29715e-09	34.9627	-0.186864	0.0296891	39.6148	40.8005	39.7229
rs149410398	16929313		T	C	0.102473	0.0840198	0.982454	40424	-0.183004	0.0310352	34.7707	35.5926	2.4321e-09	34.8554	-0.186658	0.0296904	39.5242	40.705	39.6317
c9_pos16944214	16954214		C	A	0.102851	0.084434	0.996827	40424	-0.181109	0.030753	34.682	35.4938	2.55864e-09	34.7655	-0.181678	0.0294232	38.1261	39.2351	38.2256
rs201633449	16918175		AT	A	0.101601	0.0832187	0.988229	40424	-0.182526	0.0310656	34.5216	35.3358	2.77484e-09	34.6054	-0.186073	0.0297218	39.1936	40.3614	39.2997
c9_pos16912173	16922173		T	A	0.102406	0.0838974	0.996951	40424	-0.181096	0.0308525	34.4537	35.2588	2.88675e-09	34.5363	-0.184842	0.0295215	39.2037	40.363	39.3089
rs10962699	16920050		G	A	0.101777	0.0834016	0.990527	40424	-0.181836	0.0309976	34.4115	35.2197	2.94529e-09	34.4946	-0.185136	0.0296583	38.9663	40.1213	39.0709
c9_pos16940269	16950269		G	C	0.102933	0.0845899	0.99682	40424	-0.180113	0.0307303	34.3522	35.1509	3.0512e-09	34.434	-0.181011	0.0294074	37.8875	38.9834	37.9855
rs10962700	16920785		C	A	0.102173	0.083782	0.996884	40424	-0.180838	0.0308657	34.3261	35.1281	3.08714e-09	34.4084	-0.18382	0.0295358	38.7338	39.8742	38.8368
rs118072440	16952486		C	T	0.10182	0.0835765	0.985171	40424	-0.18167	0.0310347	34.2664	35.0722	3.17704e-09	34.3491	-0.183161	0.0296891	38.0603	39.1771	38.1604
rs10962720	16931441		A	G	0.102761	0.0842579	0.998476	40424	-0.180109	0.0307703	34.2618	35.0587	3.19914e-09	34.3431	-0.18367	0.0294367	38.9311	40.076	39.0346
rs10962698	16919692		C	T	0.102232	0.0838256	0.996643	40424	-0.180459	0.03087	34.173	34.9687	3.35048e-09	34.2544	-0.18393	0.0295373	38.7759	39.9169	38.879
rs10962719	16931410		T	C	0.102745	0.0842601	0.998499	40424	-0.179798	0.0307711	34.1415	34.9339	3.4109e-09	34.2223	-0.18344	0.0294396	38.8262	39.9659	38.9291
rs55816722	16926894		AC	A	0.102072	0.0836941	0.988645	40424	-0.180748	0.0309543	34.0962	34.8908	3.48725e-09	34.1774	-0.184626	0.0296162	38.8621	40.0094	38.9658
rs10962761	16949644		G	C	0.101935	0.0837116	0.986947	40424	-0.18086	0.0309904	34.0588	34.8559	3.55032e-09	34.1404	-0.182505	0.0296502	37.8872	38.9945	37.9863
rs10962695	16918296		G	A	0.102241	0.0838675	0.996323	40424	-0.180167	0.0308698	34.063	34.8544	3.55306e-09	34.1438	-0.183529	0.0295369	38.6082	39.7412	38.7104
rs140816514	16926301		A	G	0.102004	0.0836427	0.988361	40424	-0.180722	0.0309677	34.0569	34.8503	3.56055e-09	34.138	-0.184583	0.0296294	38.8093	39.9546	38.9127
rs10962701	16923304		G	A	0.101938	0.0835865	0.989939	40424	-0.180724	0.0309694	34.0541	34.8476	3.56549e-09	34.1352	-0.184485	0.029632	38.7615	39.9049	38.8647
rs150330757	16926130		C	G	0.101303	0.0830535	0.982447	40424	-0.181768	0.0311569	34.0352	34.832	3.59417e-09	34.1168	-0.185586	0.0298125	38.7521	39.9005	38.8558
rs10962703	16923585		T	G	0.101915	0.0835711	0.99018	40424	-0.180685	0.0309752	34.0264	34.8191	3.61807e-09	34.1075	-0.184464	0.0296373	38.7388	39.8814	38.842
rs80006137	16948819		A	G	0.101971	0.0837698	0.984505	40424	-0.180755	0.0309958	34.0074	34.802	3.64998e-09	34.0887	-0.182335	0.0296562	37.8017	38.9047	37.9003
rs10962706	16925359		T	C	0.101254	0.0830173	0.983144	40424	-0.181715	0.0311631	34.0015	34.7973	3.65881e-09	34.083	-0.185511	0.0298187	38.7048	39.8514	38.8084
rs10962766	16956687		G	T	0.101556	0.0834416	0.98442	40424	-0.181235	0.0310827	33.9975	34.7947	3.66369e-09	34.0789	-0.182072	0.0297259	37.516	38.6108	37.6135
rs10962704	16923927		C	A	0.10263	0.084317	0.995772	40424	-0.179196	0.0307945	33.8618	34.6435	3.95958e-09	33.9417	-0.181931	0.0294743	38.1001	39.208	38.1993
rs200465295	16938577		A	AG	0.102223	0.0839588	0.988064	40424	-0.179984	0.030941	33.8377	34.6233	4.00089e-09	33.9175	-0.182541	0.0295942	38.0459	39.1557	38.1452
rs141242427	16937991		C	T	0.0991441	0.0815109	0.984946	40424	-0.182697	0.0314149	33.8214	34.6223	4.00294e-09	33.9034	-0.182396	0.0300702	36.7926	37.8671	36.8879
rs141012013	16938587		A	G	0.102222	0.0839592	0.98807	40424	-0.179978	0.0309409	33.8356	34.621	4.00562e-09	33.9154	-0.182534	0.0295941	38.0431	39.1528	38.1424
rs183360869	16938688		A	T	0.102221	0.0839596	0.988121	40424	-0.179961	0.0309406	33.8298	34.6151	4.01778e-09	33.9096	-0.182513	0.0295939	38.0351	39.1445	38.1344
rs201858371	16948217		TC	T	0.101865	0.0837376	0.982152	40424	-0.180264	0.0310161	33.7789	34.5656	4.12125e-09	33.8592	-0.181869	0.0296765	37.5574	38.6498	37.6547
rs12378078	16945241		C	T	0.099484	0.0818554	0.989033	40424	-0.18171	0.031288	33.7288	34.5236	4.21114e-09	33.8102	-0.181074	0.0299522	36.5473	37.6075	36.6411
rs79844200	16940825		T	C	0.0992749	0.0816496	0.986431	40424	-0.182104	0.0313578	33.7245	34.5206	4.21764e-09	33.8059	-0.18165	0.0300175	36.6201	37.6854	36.7145
rs10962750	16944135		G	A	0.0995038	0.0818739	0.989118	40424	-0.181696	0.0312874	33.7249	34.5195	4.22002e-09	33.8062	-0.181102	0.0299518	36.5593	37.6199	36.6531
rs10962707	16927732		T	C	0.102789	0.0844071	0.99555	40424	-0.178581	0.0307848	33.6508	34.4251	4.42974e-09	33.7293	-0.182406	0.029455	38.3497	39.4677	38.4501
rs10962757	16947148		G	C	0.100248	0.08261	0.997657	40424	-0.179706	0.0310507	33.4952	34.2748	4.78538e-09	33.5746	-0.178484	0.0297292	36.0438	37.0734	36.1343
rs12377884	16939718		G	T	0.102967	0.0847078	0.997504	40424	-0.17761	0.0307161	33.4352	34.1996	4.97392e-09	33.5123	-0.179717	0.0293809	37.4153	38.4882	37.5106
rs55913845	16883602		C	T	0.0695625	0.0584683	0.882173	40424	-0.221771	0.0385193	33.1476	34.1132	5.19973e-09	33.2584	-0.232489	0.0370749	39.3227	40.7936	39.471
rs10962745	16941719		G	T	0.100308	0.0826251	0.998162	40424	-0.179193	0.031046	33.3145	34.087	5.27022e-09	33.393	-0.178613	0.0297236	36.1095	37.1413	36.2002
rs55978425	16964978		G	C	0.100059	0.0818817	0.976008	40424	-0.180878	0.0314119	33.1576	33.9392	5.68614e-09	33.2369	-0.183971	0.0300388	37.5086	38.6246	37.6084
rs55813831	16958580		T	A	0.101418	0.0834904	0.983784	40424	-0.178909	0.0310795	33.1372	33.9031	5.79263e-09	33.2145	-0.179868	0.0297205	36.6264	37.6811	36.7195
rs55995817	16958583		C	T	0.101418	0.0834906	0.983785	40424	-0.178906	0.0310795	33.1362	33.9021	5.79561e-09	33.2135	-0.179864	0.0297204	36.6251	37.6797	36.7181
rs117917159	16965616		T	C	0.10006	0.0818921	0.97662	40424	-0.180669	0.0314043	33.0968	33.8761	5.87358e-09	33.1758	-0.183795	0.0300313	37.4559	38.5691	37.5553
rs56134369	16964849		C	G	0.100115	0.0819508	0.975776	40424	-0.180613	0.0313996	33.0866	33.8653	5.90628e-09	33.1655	-0.18361	0.0300259	37.3938	38.504	37.4929
c9_pos16932917	16942917		A	G	0.100267	0.0826771	0.998536	40424	-0.178074	0.0310413	32.9094	33.6674	6.53874e-09	32.986	-0.177614	0.029717	35.7225	36.7371	35.8112
rs10962769	16959695		C	G	0.102458	0.084523	0.996426	40424	-0.176395	0.0307635	32.8775	33.6244	6.68489e-09	32.9524	-0.176301	0.0294199	35.911	36.9218	35.9993
rs142815175	16961282		C	CCCT	0.101237	0.0834513	0.966251	40424	-0.178913	0.0312367	32.8062	33.5636	6.89714e-09	32.8824	-0.180338	0.0298715	36.447	37.4982	36.5396
rs56251924	16962982		T	C	0.101159	0.0833981	0.970148	40424	-0.178672	0.0312264	32.7391	33.4955	7.14291e-09	32.8152	-0.180341	0.0298716	36.448	37.501	36.5408
rs10962788	16980043		A	G	0.101263	0.0831301	0.999525	40424	-0.176634	0.0309043	32.6671	33.4166	7.43863e-09	32.7426	-0.178011	0.0295677	36.2459	37.2863	36.3373
rs76809723	16971912		C	G	0.100131	0.0820501	0.983018	40424	-0.178568	0.0313037	32.5399	33.2958	7.91534e-09	32.6159	-0.181732	0.0299379	36.8485	37.9302	36.9443
rs147405326	16972005		TC	T	0.100197	0.0821354	0.98307	40424	-0.178162	0.0312831	32.4348	33.1863	8.37384e-09	32.5102	-0.181215	0.0299173	36.6896	37.7632	36.7845
rs10962791	16981899		A	G	0.100794	0.0827999	0.990985	40424	-0.176739	0.0310407	32.419	33.1628	8.47566e-09	32.4937	-0.17801	0.0296981	35.9282	36.959	36.0183
rs10962793	16982735		G	A	0.100979	0.0829858	0.996678	40424	-0.176197	0.0309629	32.3829	33.123	8.65093e-09	32.4573	-0.177112	0.0296284	35.7339	36.7536	35.8229
rs10511630	16962019		G	C	0.897061	0.914696	0.956625	40424	0.177073	0.0311194	32.3772	33.1147	8.68794e-09	32.451	0.178555	0.0297672	35.9807	37.0045	36.0702
rs10962770	16959711		C	T	0.0995632	0.0820913	0.968729	40424	-0.179669	0.0315846	32.3593	33.1007	8.75072e-09	32.4333	-0.180567	0.030198	35.7535	36.7741	35.8426
rs143521017	16967953		CTG	C	0.101097	0.0830156	0.972563	40424	-0.1781	0.0313186	32.3385	33.0853	8.82031e-09	32.4134	-0.181845	0.02995	36.8647	37.9435	36.9602
rs138117140	16978907		G	A	0.100681	0.0827088	0.991185	40424	-0.176085	0.0310403	32.1804	32.9167	9.61934e-09	32.2542	-0.177765	0.0296978	35.8297	36.8572	35.9195
rs141451708	16978723		G	A	0.100677	0.0827042	0.990849	40424	-0.17607	0.0310421	32.1713	32.9073	9.66596e-09	32.2451	-0.177792	0.0296996	35.8361	36.864	35.9259
rs147831210	16977903		C	T	0.100662	0.0826853	0.989775	40424	-0.175985	0.0310496	32.1247	32.8593	9.9076e-09	32.1983	-0.177879	0.0297067	35.8542	36.8833	35.9442
rs4961510	16962418		C	T	0.897016	0.914581	0.956824	40424	0.17639	0.0311187	32.1295	32.8579	9.91473e-09	32.2021	0.177886	0.0297677	35.7104	36.7219	35.7986
rs10962792	16982414		T	A	0.100887	0.0829628	0.987738	40424	-0.175885	0.0310499	32.0875	32.8194	1.01131e-08	32.1608	-0.177342	0.0297075	35.6362	36.6542	35.7249
rs10962778	16973617		C	T	0.100201	0.0822005	0.988207	40424	-0.176666	0.0312075	32.0471	32.7832	1.03031e-08	32.1207	-0.179716	0.0298514	36.2446	37.2964	36.337
rs10962779	16974010		A	T	0.101049	0.0829821	0.998418	40424	-0.174953	0.0309395	31.9755	32.702	1.07427e-08	32.048	-0.177544	0.0296018	35.9731	37.0032	36.0633
rs10962780	16975096		T	C	0.100202	0.08224	0.988621	40424	-0.176032	0.0311824	31.8686	32.5978	1.13343e-08	31.9413	-0.179024	0.0298284	36.0215	37.0624	36.1127
rs75885837	16974257		T	C	0.100288	0.0823264	0.989159	40424	-0.17576	0.0311616	31.8126	32.5393	1.16806e-08	31.8851	-0.178699	0.0298074	35.9414	36.9779	36.0321
rs10962721	16931757		T	C	0.107851	0.0902068	0.983034	40424	-0.168039	0.0299802	31.4162	32.0825	1.47762e-08	31.4814	-0.170423	0.02869	35.2852	36.2259	35.366
rs10962694	16917676		A	G	0.17649	0.158896	0.944932	40424	-0.134699	0.0240865	31.2737	31.7091	1.79081e-08	31.3168	-0.120646	0.0231017	27.2734	27.6877	27.3045
rs10962725	16933037		G	A	0.107475	0.0900805	0.999967	40424	-0.16546	0.0298793	30.665	31.3046	2.20556e-08	30.7272	-0.16733	0.0285976	34.2363	35.1314	34.3121
rs79901991	16881595		T	C	0.0176358	0.0132518	0.58927	40424	-0.529821	0.0992875	28.4754	30.6213	3.13632e-08	28.8533	-0.518595	0.0958683	29.2622	31.8127	29.6433
rs4497063	16876346		G	A	0.0863845	0.0743429	0.961331	40424	-0.178926	0.0328069	29.7452	30.4493	3.42707e-08	29.8191	-0.18833	0.0315807	35.5627	36.6538	35.6632
rs60234091	16877233		G	A	0.0867927	0.0747368	0.961976	40424	-0.178475	0.0327405	29.7155	30.4185	3.48192e-08	29.7891	-0.188096	0.0315136	35.6256	36.7187	35.7263
rs60880076	16877259		A	T	0.0867933	0.0747383	0.961995	40424	-0.178464	0.0327405	29.712	30.4149	3.48838e-08	29.7856	-0.188085	0.0315135	35.6219	36.7149	35.7226
rs200778526	16954487		C	CTG	0.102927	0.0884313	0.784252	40424	-0.186923	0.0343145	29.6735	30.3042	3.69325e-08	29.7338	-0.18207	0.032792	30.8277	31.6154	30.8921
rs7862084	16869811		C	A	0.0847383	0.0729938	0.99093	40424	-0.177599	0.0328472	29.2336	29.9238	4.49363e-08	29.3051	-0.184082	0.0316141	33.9048	34.9245	33.9967
rs7047534	16886487		T	C	0.0849516	0.0733071	0.956902	40424	-0.179377	0.0333354	28.9549	29.64	5.20203e-08	29.0262	-0.189197	0.0320792	34.784	35.8503	34.8815
rs7035522	16880050		C	T	0.0852292	0.0731815	0.991781	40424	-0.175879	0.032792	28.7669	29.4368	5.77702e-08	28.8359	-0.186862	0.0315595	35.0575	36.1258	35.1553
rs10435763	16885854		G	T	0.0851301	0.0733184	0.991103	40424	-0.17564	0.0327785	28.7125	29.3792	5.9513e-08	28.7811	-0.184842	0.0315478	34.329	35.362	34.4226
rs62541874	16840005		A	T	0.0886949	0.0791316	0.739062	40424	-0.198923	0.0371209	28.7164	29.3062	6.17976e-08	28.774	-0.176467	0.0356506	24.5015	25.0501	24.5426
rs111567891	16870939		A	C	0.0849711	0.0732965	0.971385	40424	-0.175827	0.0329178	28.5307	29.1946	6.54614e-08	28.5988	-0.184089	0.031678	33.7706	34.7831	33.8618
rs7862213	16869905		C	T	0.0847863	0.0732238	0.990906	40424	-0.174721	0.0328063	28.3646	29.0217	7.15721e-08	28.4319	-0.181193	0.031572	32.9367	33.9098	33.0233
rs72365698	16868399		CTCTA	C	0.0853555	0.0738768	0.968729	40424	-0.173629	0.0328602	27.9192	28.5613	9.07785e-08	27.9846	-0.179958	0.0316203	32.3898	33.339	32.4736
rs7872189	16940437		G	A	0.130889	0.115749	0.920229	40424	-0.147115	0.0281242	27.3626	27.8106	1.33791e-07	27.4035	-0.142962	0.0268867	28.2724	28.8342	28.3149
rs7864078	16975940		G	T	0.7797	0.799787	0.995391	40424	0.112071	0.0214797	27.2227	27.5071	1.56519e-07	27.2502	0.10269	0.020539	24.9975	25.2877	25.0194
rs201745812	16871042		GT	G	0.0187613	0.0142871	0.517772	40424	-0.516503	0.101541	25.8738	27.4914	1.57795e-07	26.1135	-0.497478	0.0974315	26.0705	27.9773	26.3131
rs7860276	16874141		G	A	0.0874444	0.0756271	0.97278	40424	-0.167844	0.0324011	26.8346	27.4259	1.6323e-07	26.8935	-0.179516	0.0311774	33.1534	34.1181	33.2391
rs192777993	16978226		A	G	0.0878227	0.0728555	0.940571	40424	-0.174763	0.0337736	26.7758	27.3736	1.67705e-07	26.8332	-0.173691	0.032368	28.7955	29.5872	28.8597
rs7024013	16872434		A	T	0.0857789	0.0742161	0.989951	40424	-0.168546	0.0326301	26.6808	27.2716	1.76789e-07	26.7397	-0.179155	0.031399	32.5556	33.4999	32.6391
rs7045198	16917672		G	T	0.345627	0.329951	0.829379	40424	-0.104369	0.0200531	27.0879	27.2355	1.80121e-07	27.1087	-0.092004	0.0191839	23.0006	23.1323	23.0144
rs10962763	16950860		A	C	0.432091	0.450918	0.999597	40424	0.0914813	0.0175944	27.0342	27.0207	2.01288e-07	27.0531	0.0834264	0.0167894	24.6909	24.6685	24.7053
rs10962739	16940254		G	C	0.445221	0.463312	0.988057	40424	0.0913326	0.0175792	26.9932	26.9874	2.04786e-07	27.0119	0.0809907	0.0167679	23.3299	23.3165	23.3427
rs113593132	16861764		G	A	0.0747388	0.06402	0.936488	40424	-0.183122	0.0357596	26.2238	26.8664	2.18016e-07	26.2895	-0.190281	0.034418	30.5644	31.519	30.6493
rs1832549	16948534		T	G	0.438129	0.457129	0.996232	40424	0.0913055	0.0176203	26.8513	26.8416	2.20832e-07	26.87	0.0833732	0.0168124	24.5919	24.5735	24.6061
rs10962740	16940390		G	T	0.445783	0.46385	0.998345	40424	0.0908394	0.0175592	26.7632	26.7581	2.30583e-07	26.7817	0.0806695	0.0167499	23.1951	23.1825	23.2077
rs10962790	16981782		A	C	0.220742	0.200937	0.99439	40424	-0.110472	0.0214752	26.4622	26.7331	2.33586e-07	26.4881	-0.10153	0.0205301	24.4571	24.7366	24.478
c9_pos16838526	16848526		A	C	0.0869455	0.0749953	0.99455	40424	-0.165364	0.0323969	26.0541	26.6223	2.47372e-07	26.1096	-0.173769	0.0311809	31.0574	31.9358	31.1323
rs10756847	16946673		T	C	0.507975	0.530445	0.996345	40424	0.0901399	0.0174901	26.5612	26.5966	2.50685e-07	26.5791	0.0857815	0.0166981	26.3907	26.4253	26.4069
rs142203010	16939181		TAGAA	T	0.446719	0.4646	0.980651	40424	0.0909094	0.0176572	26.5078	26.5025	2.63197e-07	26.5259	0.0802653	0.0168415	22.7141	22.7014	22.7262
rs34490323	16953117		G	C	0.436388	0.455304	0.987141	40424	0.0904414	0.0175947	26.4225	26.412	2.75822e-07	26.4405	0.0834802	0.016793	24.7123	24.693	24.7267
rs10962759	16948075		A	C	0.438664	0.456963	0.974451	40424	0.0904202	0.0176805	26.1543	26.1434	3.16979e-07	26.172	0.0810212	0.0168656	23.0778	23.0592	23.0904
rs4961429	16956581		C	G	0.434271	0.453013	0.99759	40424	0.0900058	0.0176006	26.1508	26.1388	3.17735e-07	26.1685	0.0827696	0.0167984	24.2776	24.2569	24.2915
c9_pos16857042	16867042		G	A	0.0842871	0.073431	0.99302	40424	-0.165664	0.0327913	25.5234	26.079	3.27729e-07	25.5776	-0.170663	0.0315456	29.2684	30.0758	29.3366
rs10810696	16957138		G	A	0.433075	0.451524	0.99701	40424	0.0897418	0.017612	25.9639	25.9511	3.50176e-07	25.9814	0.0816215	0.0168067	23.5855	23.5645	23.5987
rs7469270	16942496		T	C	0.442932	0.460308	0.998501	40424	0.089035	0.0175747	25.6652	25.6581	4.07581e-07	25.6823	0.0792464	0.0167626	22.3499	22.3359	22.3616
rs7044268	16859400		A	T	0.0855128	0.0743385	0.995673	40424	-0.162941	0.0325328	25.0854	25.6225	4.1517e-07	25.1373	-0.169971	0.0313065	29.4769	30.288	29.5451
rs56155231	16858738		G	A	0.0841063	0.0730824	0.97412	40424	-0.165275	0.0330714	24.9752	25.5179	4.38298e-07	25.028	-0.173057	0.0318192	29.5801	30.4077	29.6502
rs10962767	16958463		A	C	0.434667	0.453117	0.997042	40424	0.0884342	0.0176005	25.2458	25.234	5.07791e-07	25.2622	0.0816668	0.0167975	23.6376	23.6175	23.6508
rs13302481	16954002		C	T	0.434974	0.453277	0.998008	40424	0.0883092	0.0175883	25.2095	25.198	5.17358e-07	25.2259	0.0808701	0.0167873	23.2068	23.1874	23.2195
rs111733097	16861281		G	C	0.0848121	0.0739194	0.966156	40424	-0.163494	0.0330174	24.5199	25.045	5.60078e-07	24.5703	-0.170969	0.0317631	28.9728	29.7704	29.0396
rs7047512	16856367		T	C	0.0856443	0.0746386	0.998345	40424	-0.160267	0.0324381	24.4104	24.9252	5.95983e-07	24.4595	-0.166905	0.0312074	28.6037	29.3777	28.668
rs13297923	16953684		A	G	0.43523	0.453489	0.998029	40424	0.087799	0.0175858	24.9262	24.9149	5.99175e-07	24.9423	0.0805158	0.0167846	23.0113	22.9922	23.0238
c9_pos16845925	16855925		T	C	0.0856039	0.0746165	0.998467	40424	-0.159949	0.0324456	24.3026	24.8136	6.31503e-07	24.3512	-0.166616	0.0312132	28.4944	29.2636	28.5581
rs60618682	16852683		A	G	0.0847331	0.0736376	0.977894	40424	-0.160873	0.0328387	23.9992	24.5072	7.40327e-07	24.0473	-0.17019	0.0315899	29.0248	29.8263	29.0917
c9_pos16845132	16855132		C	T	0.0791345	0.0682628	0.969078	40424	-0.167419	0.0342299	23.922	24.4528	7.61528e-07	23.9735	-0.175893	0.0329495	28.497	29.3189	28.567
rs1970389	16942337		G	A	0.446726	0.46337	0.983172	40424	0.0871211	0.0176201	24.4473	24.4408	7.66286e-07	24.4628	0.0773768	0.0168078	21.1933	21.1807	21.2039
rs200607086	16855130		GGC	G	0.0612691	0.0524482	0.819127	40424	-0.205854	0.0422332	23.758	24.3588	7.99606e-07	23.8179	-0.213263	0.040603	27.5878	28.4769	27.6657
rs13287985	16960741		G	A	0.43563	0.453355	0.947935	40424	0.087682	0.0178819	24.0433	24.0303	9.48316e-07	24.0583	0.0804531	0.0170577	22.2456	22.2251	22.2574
rs75764795	16857335		C	T	0.0851083	0.0744053	0.965522	40424	-0.159946	0.0330077	23.4809	23.9727	9.77114e-07	23.5274	-0.168358	0.0317459	28.1248	28.8877	28.1879
rs143941110	16851983		TATA	T	0.0872011	0.0761034	0.954454	40424	-0.158742	0.0327894	23.4377	23.9223	1.00303e-06	23.483	-0.168636	0.0315488	28.5718	29.3464	28.6358
rs946543	16959540		G	C	0.433424	0.451167	0.994694	40424	0.0858778	0.0176142	23.7704	23.7581	1.09235e-06	23.785	0.0787487	0.016811	21.9432	21.9236	21.9546
rs1339550	16854839		T	C	0.914687	0.925323	1	40424	0.155841	0.0324159	23.1125	23.5849	1.19522e-06	23.1565	0.161986	0.0311808	26.9886	27.6959	27.0458
rs79782631	16921752		A	G	0.0158792	0.0112651	0.730923	40424	-0.443035	0.0942498	22.096	23.5737	1.20219e-06	22.3362	-0.461898	0.0909832	25.7733	27.9438	26.0927
rs17743955	16836893		G	C	0.107827	0.0984195	0.770735	40424	-0.158309	0.0329408	23.0963	23.4864	1.258e-06	23.1303	-0.138377	0.0316192	19.1525	19.4987	19.1753
c9_pos16838192	16848192		G	T	0.0855183	0.0741765	0.993844	40424	-0.156195	0.0326049	22.9493	23.4196	1.30245e-06	22.9928	-0.166943	0.0313674	28.3257	29.093	28.3888
rs11792459	16943924		T	G	0.265459	0.247729	0.805994	40424	-0.107357	0.0223705	23.0307	23.1786	1.47631e-06	23.0473	-0.10811	0.0214154	25.4845	25.6868	25.503
rs1538588	16944006		A	T	0.446223	0.465065	0.82686	40424	0.0919773	0.0191883	22.9767	22.9826	1.63474e-06	22.9903	0.0872607	0.0183098	22.7128	22.7138	22.7248
rs201402022	16993944		T	TTTCC	0.0647067	0.0538547	0.735772	40424	-0.20851	0.0441141	22.3408	22.8788	1.72544e-06	22.3919	-0.216281	0.0422759	26.1729	26.978	26.2399
rs11998905	16845998		A	G	0.118467	0.106492	0.899296	40424	-0.137475	0.0292875	22.0335	22.3865	2.22936e-06	22.0638	-0.14307	0.0280933	25.9355	26.472	25.9752
rs10962747	16942642		A	T	0.332388	0.311127	0.999024	40424	-0.0886784	0.0188354	22.1659	22.2756	2.36189e-06	22.18	-0.0877524	0.0180193	23.7161	23.8585	23.7309
rs190840275	16907695		A	T	0.0155044	0.0128335	0.347847	40424	-0.614282	0.134529	20.8499	22.2453	2.39945e-06	21.08	-0.570763	0.12972	19.3596	20.8025	19.544
rs11790330	16943861		G	A	0.332249	0.311082	0.991853	40424	-0.0884193	0.0188381	22.0302	22.1388	2.53631e-06	22.0441	-0.0874449	0.0180207	23.5464	23.6871	23.561
rs11792883	16944034		T	C	0.332119	0.310988	0.99891	40424	-0.0884291	0.0188404	22.0299	22.1386	2.53658e-06	22.0437	-0.0872931	0.018023	23.4588	23.5989	23.4732
rs200406339	16851324		AGTG	A	0.0144067	0.0122008	0.200378	40424	-0.852125	0.187898	20.5666	22.1012	2.58648e-06	20.7892	-0.886334	0.180928	23.9984	26.1982	24.2889
rs7865933	16951205		C	A	0.403955	0.385927	0.980734	40424	-0.0847614	0.0180607	22.0256	22.0947	2.59525e-06	22.0385	-0.0787857	0.0172618	20.8315	20.9039	20.842
rs10962755	16944968		C	T	0.332197	0.311044	0.990719	40424	-0.0883257	0.0188391	21.9813	22.0896	2.60216e-06	21.9951	-0.0873948	0.0180215	23.5174	23.6579	23.5319
c9_pos16974609	16984609		A	G	0.109964	0.093119	0.98472	40424	-0.138231	0.0296591	21.7218	22.0888	2.60324e-06	21.7526	-0.146696	0.0283735	26.7308	27.3318	26.7761
rs10962742	16941297		A	G	0.33252	0.311359	0.998729	40424	-0.0875182	0.0188256	21.6122	21.7176	3.1588e-06	21.6256	-0.0870295	0.0180105	23.3497	23.4886	23.364
rs1538591	16943514		C	T	0.163429	0.149875	0.973798	40424	-0.113187	0.0245075	21.3303	21.5793	3.39496e-06	21.3509	-0.103632	0.0234647	19.5054	19.7622	19.5219
rs187181554	16907706		A	G	0.0152229	0.0125841	0.351442	40424	-0.60584	0.134942	20.1568	21.4884	3.55976e-06	20.3748	-0.563997	0.130163	18.775	20.1612	18.9512
rs11789463	16836011		G	A	0.50879	0.490461	0.6472	40424	-0.10107	0.0218375	21.4208	21.4372	3.65609e-06	21.434	-0.10107	0.0206607	23.9307	23.9524	23.9444
rs78974792	16986962		T	C	0.109015	0.0926464	0.939977	40424	-0.138991	0.0302946	21.0495	21.4028	3.72227e-06	21.079	-0.147528	0.0289743	25.9251	26.5048	25.9683
rs7853148	16921847		T	C	0.627097	0.641072	0.999965	40424	0.0835321	0.0181048	21.2872	21.3699	3.7867e-06	21.2994	0.07287	0.0172869	17.7689	17.84	17.7768
rs9298767	16919023		C	G	0.613872	0.627432	0.933479	40424	0.0850769	0.0185233	21.0952	21.1756	4.19066e-06	21.1073	0.0742232	0.0176848	17.6149	17.6841	17.6226
rs34983435	16917322		G	C	0.106705	0.0960387	0.915526	40424	-0.137992	0.0303084	20.7291	21.066	4.43732e-06	20.7582	-0.141416	0.0291952	23.4626	23.951	23.4983
rs7019530	16936082		G	A	0.831534	0.845408	0.992527	40424	0.109424	0.0240008	20.7862	21.0156	4.55559e-06	20.8052	0.1034	0.0229833	20.2401	20.5017	20.2572
rs1001301	16925586		A	G	0.621877	0.635036	0.980022	40424	0.0826368	0.0180814	20.8872	20.9636	4.68093e-06	20.8989	0.0719103	0.0172719	17.3341	17.3993	17.3415
rs11790448	16938501		G	A	0.859272	0.874705	0.774499	40424	0.135099	0.029806	20.5446	20.8451	4.97965e-06	20.5688	0.142665	0.02845	25.1463	25.6317	25.1812
c9_pos16941373	16951373		G	C	0.401175	0.383459	0.996621	40424	-0.082145	0.0180421	20.7294	20.7918	5.12017e-06	20.7408	-0.0766512	0.0172468	19.7525	19.8188	19.762
rs10810673	16923184		C	T	0.599749	0.61235	0.915671	40424	0.0843296	0.0185255	20.7214	20.7905	5.12365e-06	20.7328	0.0727977	0.0176945	16.9262	16.9834	16.9332
rs72432685	16959578		GA	G	0.40334	0.385657	0.975827	40424	-0.0822654	0.0181354	20.5769	20.6383	5.54752e-06	20.5881	-0.0776894	0.0173305	20.0956	20.1634	20.1054
rs1538589	16942901		C	T	0.393822	0.37656	0.999996	40424	-0.0820057	0.0180844	20.5626	20.6275	5.5789e-06	20.5739	-0.0761553	0.0172852	19.4111	19.4792	19.4203
rs62543887	16785289		A	G	0.0119381	0.00895492	0.359813	40424	-0.693415	0.159387	18.927	20.4694	6.05923e-06	19.1619	-0.754071	0.153164	24.2388	26.7995	24.6396
rs11791869	16921722		G	A	0.620728	0.633498	0.987184	40424	0.0811592	0.0180353	20.2502	20.3216	6.54574e-06	20.2611	0.0700303	0.017223	16.5331	16.5924	16.5398
rs5896723	16918149		CT	C	0.623835	0.637299	0.975075	40424	0.0819483	0.0182212	20.2267	20.3001	6.61971e-06	20.2376	0.0723781	0.017395	17.3128	17.3787	17.3202
rs117522411	16730041		C	T	0.0253628	0.0226629	0.242708	40424	-0.519665	0.117691	19.4968	20.2717	6.71871e-06	19.6298	-0.435467	0.115851	14.1291	14.7453	14.182
rs78245906	17017993		G	C	0.0924952	0.0774421	0.981128	40424	-0.143305	0.0321377	19.8835	20.2524	6.78683e-06	19.9148	-0.157555	0.0307845	26.1937	26.8614	26.2455
rs74885297	17018081		T	C	0.0924875	0.0774342	0.981354	40424	-0.143263	0.0321355	19.8747	20.2433	6.81919e-06	19.906	-0.157537	0.0307825	26.1914	26.8589	26.2432
rs1537001	16676967		C	A	0.0695804	0.0780238	0.488747	40424	0.213253	0.047047	20.546	20.217	6.91358e-06	20.5839	0.212711	0.044624	22.7219	22.2741	22.7697
rs78218713	17018847		A	G	0.0924212	0.0773705	0.983679	40424	-0.142847	0.0321138	19.786	20.1518	7.15329e-06	19.817	-0.157327	0.0307629	26.1548	26.8205	26.2064
rs185797278	17036343		T	C	0.0923047	0.077275	0.972963	40424	-0.143803	0.0323343	19.7794	20.1483	7.16639e-06	19.8107	-0.159265	0.0309677	26.4497	27.1322	26.503
rs79668955	17034383		A	G	0.0934463	0.0784463	0.973346	40424	-0.142716	0.0321477	19.7081	20.0719	7.45845e-06	19.7388	-0.157251	0.0307913	26.0813	26.7438	26.1326
rs3762426	17019516		T	G	0.0924311	0.0773937	0.9844	40424	-0.142412	0.0320972	19.686	20.0487	7.54948e-06	19.7167	-0.156973	0.0307469	26.0644	26.726	26.1156
rs78214581	17039684		G	A	0.0922014	0.0771938	0.972684	40424	-0.143429	0.0323557	19.6505	20.0161	7.67929e-06	19.6815	-0.159052	0.0309868	26.3468	27.0259	26.3996
rs10810676	16923559		G	A	0.614242	0.626984	0.957525	40424	0.0812502	0.0182035	19.9223	19.9907	7.78197e-06	19.9328	0.0707408	0.0173929	16.5424	16.6008	16.5491
rs190007171	17043460		T	C	0.0924463	0.0775902	0.958204	40424	-0.143963	0.0325037	19.6171	19.9814	7.81991e-06	19.6479	-0.158914	0.0311306	26.0586	26.7257	26.1103
0	17043459		T	TC	0.0924341	0.0775802	0.958228	40424	-0.143951	0.032505	19.6125	19.9767	7.83916e-06	19.6433	-0.158891	0.0311319	26.0489	26.7157	26.1006
0	17019918		C	CT	0.0924553	0.0774307	0.98485	40424	-0.142108	0.0320891	19.612	19.9724	7.85681e-06	19.6424	-0.156695	0.0307388	25.9858	26.644	26.0366
rs10962696	16919058		T	G	0.621908	0.634682	0.988352	40424	0.0805348	0.0180721	19.8586	19.9289	8.03761e-06	19.8692	0.07003	0.017259	16.464	16.524	16.4706
rs74524793	17040637		C	T	0.0922734	0.0773034	0.970906	40424	-0.142927	0.0323696	19.4963	19.8576	8.34304e-06	19.5268	-0.158521	0.0309998	26.1489	26.8204	26.201
rs10962697	16919545		T	C	0.622707	0.635388	0.997541	40424	0.0803624	0.0180741	19.7693	19.8399	8.42065e-06	19.7798	0.0697516	0.0172612	16.3292	16.3893	16.3358
rs55814049	17026505		G	T	0.0928027	0.0777865	0.981478	40424	-0.14163	0.0320883	19.4812	19.8382	8.42814e-06	19.5112	-0.156235	0.0307334	25.8426	26.4951	25.8929
rs75041907	17038460		C	T	0.091832	0.0769107	0.970027	40424	-0.143186	0.0324473	19.4734	19.8349	8.4427e-06	19.5039	-0.159016	0.0310784	26.1795	26.8535	26.2319
rs77281847	17040281		C	T	0.0921004	0.0771362	0.972939	40424	-0.142729	0.0323624	19.4512	19.8112	8.54803e-06	19.4815	-0.158373	0.0309925	26.1124	26.7826	26.1644
rs79439080	17040820		G	A	0.0920942	0.0771356	0.972864	40424	-0.142665	0.0323637	19.432	19.7914	8.63704e-06	19.4623	-0.158316	0.0309939	26.0914	26.7607	26.1433
rs149218872	16949567		TTTAA	T	0.395342	0.378494	0.976246	40424	-0.0806878	0.0181844	19.6888	19.7502	8.82525e-06	19.6991	-0.0749353	0.0173811	18.5874	18.6519	18.5958
rs56316548	17031532		T	C	0.0930335	0.0780583	0.978686	40424	-0.141046	0.0320941	19.3139	19.6663	9.22133e-06	19.3434	-0.155974	0.0307405	25.7443	26.3931	25.7942
rs78700738	17021665		T	C	0.092446	0.0774625	0.985205	40424	-0.140958	0.0320811	19.3056	19.6573	9.26487e-06	19.335	-0.155909	0.0307286	25.7431	26.3918	25.793
rs76975494	17025447		T	G	0.0921522	0.0772031	0.980706	40424	-0.141259	0.0322051	19.2389	19.5906	9.59401e-06	19.2684	-0.156599	0.0308448	25.7758	26.4287	25.8261
rs78965856	17029869		C	A	0.0919577	0.077013	0.978317	40424	-0.141538	0.0322716	19.2355	19.5881	9.60657e-06	19.265	-0.157231	0.0309076	25.8788	26.5376	25.9297
rs112803367	17023750		G	A	0.0923733	0.0774801	0.979936	40424	-0.140994	0.0321582	19.2228	19.5729	9.6833e-06	19.2521	-0.155489	0.0308042	25.4788	26.1179	25.5278
rs111991906	17033175		C	T	0.0921293	0.0772201	0.975657	40424	-0.14145	0.0322927	19.1866	19.5381	9.86131e-06	19.2161	-0.157148	0.0309275	25.8185	26.4752	25.8691
rs55895101	17031056		C	T	0.0920255	0.077122	0.977476	40424	-0.140902	0.0322727	19.0617	19.4094	1.05487e-05	19.0907	-0.156753	0.0309084	25.7206	26.3731	25.7709
rs112488223	17027407		G	A	0.091603	0.0767673	0.975821	40424	-0.141045	0.0323584	18.9996	19.3463	1.0903e-05	19.0286	-0.156679	0.0309935	25.5552	26.2023	25.6049
rs10962781	16975258		A	G	0.0988798	0.0825871	0.99879	28728	-0.15795	0.0364584	18.7691	19.1342	1.21842e-05	18.8044	-0.147806	0.0348841	17.9526	18.364	17.9839
rs200547272	16918151		TG	T	0.620734	0.633139	0.976641	40424	0.0787457	0.0181295	18.8661	18.9295	1.35639e-05	18.8756	0.0682016	0.01731	15.5236	15.5771	15.5295
rs55672367	16983862		C	T	0.235513	0.217989	0.891	40424	-0.095334	0.0221919	18.4547	18.5962	1.61542e-05	18.4668	-0.0959112	0.0211979	20.4717	20.6689	20.4856
rs12684159	17017674		T	C	0.0938656	0.0794057	0.979361	40424	-0.135475	0.0318353	18.1091	18.423	1.7691e-05	18.1346	-0.148618	0.0304824	23.771	24.3366	23.8129
rs10810684	16936252		C	T	0.646892	0.658884	0.993581	40424	0.0785538	0.0184008	18.2247	18.2972	1.88985e-05	18.2339	0.0678242	0.0175652	14.9095	14.9704	14.9152
rs1890641	16943412		T	A	0.674666	0.688452	0.998245	40424	0.0794908	0.018723	18.0254	18.1088	2.08635e-05	18.0347	0.0700534	0.0179086	15.3016	15.3767	15.3078
rs10962633	16841972		T	C	0.206232	0.196019	0.944164	40424	-0.094467	0.0223475	17.869	18.0209	2.18493e-05	17.8813	-0.098654	0.0214663	21.1209	21.3522	21.1369
rs183107926	16907705		C	T	0.0115245	0.00891702	0.404383	40424	-0.607916	0.149892	16.4486	17.7142	2.56703e-05	16.669	-0.663353	0.144835	20.9769	23.0464	21.2762
rs13286591	16937046		G	T	0.645407	0.656823	0.977211	40424	0.0770744	0.0183936	17.5585	17.6253	2.68986e-05	17.5669	0.0653564	0.0175557	13.8593	13.9123	13.8642
rs10756817	16843384		G	A	0.790494	0.800397	0.939594	40424	0.0927627	0.022229	17.4143	17.5567	2.78866e-05	17.4258	0.0962449	0.0213512	20.3194	20.5325	20.334
rs10810642	16841515		A	G	0.440285	0.45319	0.997683	40424	0.0734673	0.0175677	17.4888	17.4813	2.90148e-05	17.4967	0.0608457	0.016753	13.1909	13.1817	13.195
rs200848163	16934885		T	TTATTTTTA	0.643965	0.655551	0.955854	40424	0.0770337	0.0185389	17.266	17.3304	3.14121e-05	17.2741	0.0678626	0.0177016	14.6973	14.755	14.7027
rs56216509	16987919		C	T	0.108766	0.0937993	0.929179	40424	-0.124725	0.030337	16.903	17.1566	3.44211e-05	16.9222	-0.132714	0.0289901	20.9572	21.3777	20.9856
rs12376763	16987837		T	C	0.111382	0.0963115	0.907906	40424	-0.124017	0.0303629	16.6829	16.9297	3.87899e-05	16.7015	-0.13312	0.0290135	21.0518	21.4724	21.0803
rs184969716	16869331		C	T	0.000565027	0.000322186	0.169311	40424	-6.03238	1.93759	9.6929	16.7511	4.26176e-05	11.444	-5.98681	1.93116	9.61065	15.8773	10.4696
rs12350807	16876295		T	G	0.165145	0.173487	0.74088	40424	0.109521	0.0266921	16.8355	16.701	4.37579e-05	16.8489	0.12066	0.0254359	22.5028	22.2468	22.5252
rs72713810	16836723		A	T	0.11645	0.108234	0.601402	40424	-0.144658	0.0359611	16.1814	16.4095	5.10288e-05	16.1989	-0.147842	0.0344465	18.4208	18.7491	18.4419
rs151259031	17325511		C	T	0.000729527	0.000488031	0.134002	40424	-5.62269	1.71422	10.7586	16.2993	5.40839e-05	10.8614	-5.90799	1.76949	11.1476	16.3209	10.3625
rs55646263	16988024		AG	A	0.110162	0.0953623	0.930391	40424	-0.12064	0.0301057	16.0577	16.2905	5.43357e-05	16.0749	-0.128022	0.0287761	19.7927	20.1755	19.8179
rs263640	17019121		G	A	0.0966231	0.0833985	0.996632	40424	-0.122883	0.0309367	15.7772	16.0198	6.26835e-05	15.7958	-0.132429	0.0296511	19.9472	20.3615	19.9756
rs72713815	16841213		A	T	0.103845	0.093686	0.893423	40424	-0.121378	0.0310761	15.2556	15.4729	8.36967e-05	15.2717	-0.134024	0.0298418	20.1704	20.5684	20.1973
rs12685003	17022667		A	G	0.100561	0.0870286	0.979208	40424	-0.119056	0.0306339	15.1043	15.3269	9.04198e-05	15.1208	-0.128311	0.0293168	19.1556	19.5358	19.1808
rs10962714	16930523		G	A	0.648074	0.659149	0.981786	40424	0.0719334	0.0184253	15.2417	15.2965	9.18866e-05	15.2481	0.064789	0.0176015	13.5489	13.6016	13.5536
rs10756813	16788308		C	T	0.673663	0.659055	0.704082	40424	-0.086144	0.0220609	15.2477	15.2072	9.63354e-05	15.2543	-0.0659625	0.0209949	9.87108	9.84313	9.87364
rs10962717	16931236		T	C	0.648976	0.660079	0.998416	40424	0.0715215	0.018397	15.1141	15.1685	9.83301e-05	15.1204	0.0643584	0.0175731	13.4127	13.4649	13.4172
rs955138	16843999		G	C	0.176945	0.168165	0.945467	40424	-0.0919818	0.0237381	15.0145	15.1465	9.94826e-05	15.0241	-0.0948345	0.0227982	17.3035	17.4981	17.3154
rs10962590	16785478		C	G	0.692342	0.674111	0.932196	40424	-0.0745806	0.0193725	14.821	14.7769	0.000121009	14.8274	-0.062868	0.0184499	11.6111	11.5721	11.6147
rs10810683	16933734		C	T	0.648457	0.659243	0.99521	40424	0.0703333	0.0183969	14.6161	14.6676	0.000128232	14.622	0.0626748	0.0175724	12.721	12.7689	12.7251
rs74645810	16788333		T	C	0.538435	0.525806	0.538817	40424	-0.0913805	0.0238886	14.6327	14.6264	0.000131066	14.6385	-0.072239	0.0227511	10.0818	10.075	10.0843
rs117610736	16719856		T	G	0.0119318	0.0101027	0.262075	40424	-0.628839	0.168851	13.8699	14.6085	0.000132316	13.9998	-0.577132	0.166972	11.947	12.6767	12.0234
rs10810629	16787786		T	C	0.69428	0.676632	0.920802	40424	-0.0746634	0.0195498	14.5857	14.5413	0.00013712	14.5919	-0.0618837	0.0186125	11.0546	11.0173	11.0578
rs10962718	16931342		T	C	0.648102	0.658904	0.999486	40424	0.0699232	0.0183799	14.4729	14.5234	0.000138429	14.4787	0.063115	0.0175568	12.9233	12.9722	12.9275
rs139856173	16660175		G	A	0.000822318	0.000600962	0.112577	40424	-4.89437	1.55555	9.89985	14.4177	0.00014642	10.8214	-4.60322	1.50943	9.30028	13.3033	9.81741
rs7030959	16917926		T	C	0.21595	0.201921	0.917585	40424	-0.0847392	0.0224041	14.3058	14.4124	0.000146832	14.3136	-0.0784243	0.0214089	13.4188	13.5327	13.4253
rs10810628	16787406		T	C	0.696925	0.679381	0.933519	40424	-0.0738586	0.0194577	14.4086	14.3647	0.000150599	14.4146	-0.0604895	0.018529	10.6575	10.6219	10.6605
rs11795031	16786930		G	A	0.692552	0.674599	0.933735	40424	-0.0733725	0.0193906	14.3181	14.2759	0.000157873	14.324	-0.0617622	0.0184657	11.1869	11.1499	11.1903
rs10756812	16786303		G	A	0.695582	0.677879	0.936031	40424	-0.0726899	0.0193957	14.0456	14.0035	0.000182471	14.0513	-0.0601449	0.0184715	10.6021	10.5671	10.6051
rs13288423	16837371		A	G	0.174978	0.168337	0.783755	40424	-0.0971354	0.026107	13.8434	13.9614	0.000186603	13.8517	-0.0959017	0.0250511	14.6554	14.8075	14.6641
rs35973674	17027928		C	CA	0.124827	0.109608	0.975445	40424	-0.102877	0.0277329	13.7609	13.9253	0.000190221	13.7723	-0.115394	0.0265758	18.8537	19.1698	18.874
rs10962534	16675849		C	G	0.101602	0.111638	0.495211	40424	0.149387	0.0398475	14.0548	13.9088	0.000191898	14.0673	0.152343	0.037745	16.2902	16.0833	16.3064
rs12004693	17028377		T	C	0.125148	0.10995	0.97349	40424	-0.1028	0.0277351	13.738	13.9019	0.000192604	13.7494	-0.115256	0.026578	18.8055	19.1201	18.8256
rs11560481	17290566		C	T	0.0170593	0.0132193	0.775779	40424	-0.310591	0.085259	13.2708	13.8769	0.000195183	13.3454	-0.322852	0.0817484	15.5973	16.5022	15.7022
c9_pos16832310	16842310		T	C	0.10407	0.0942719	0.923824	40424	-0.112802	0.0305416	13.6412	13.8208	0.000201098	13.6538	-0.124186	0.029332	17.9252	18.2531	17.9462
rs10962629	16833220		C	T	0.54265	0.525641	0.644918	40424	-0.0813318	0.021891	13.8035	13.7994	0.000203401	13.8089	-0.0880951	0.0207217	18.074	18.0739	18.0818
rs181992169	16755751		C	A	0.00131556	0.000897176	0.137192	40424	-3.20528	0.947967	11.4326	13.7481	0.000209032	11.5857	-3.28925	0.901915	13.3003	16.6911	13.736
rs118116942	16820568		T	C	0.0226046	0.0192589	0.340981	40424	-0.393752	0.109557	12.9172	13.448	0.000245268	12.9797	-0.462796	0.106289	18.9585	20.0809	19.0836
rs148685761	16916990		G	A	0.00137207	0.00198192	0.446065	40424	1.16763	0.309926	14.1937	13.3843	0.000253739	14.8801	0.901983	0.285486	9.98224	9.29923	10.3412
rs77739273	16988961		A	G	0.10237	0.0895738	0.94844	40424	-0.111653	0.0307445	13.1887	13.3675	0.000256022	13.201	-0.113832	0.029418	14.9727	15.2318	14.988
rs10631074	16875759		G	GCCA	0.916549	0.903547	0.953275	40424	-0.112547	0.0306605	13.4744	13.3291	0.000261319	13.4871	-0.134117	0.0292198	21.0675	20.7167	21.0987
rs4378062	16779899		G	T	0.838332	0.829993	0.859484	40424	-0.0925627	0.0252735	13.4135	13.3188	0.000262758	13.4215	-0.070939	0.0240294	8.71534	8.65279	8.71853
rs36067353	16827705		C	A	0.535619	0.519237	0.651903	40424	-0.0791438	0.0217593	13.2295	13.2267	0.000275989	13.2345	-0.0844597	0.0206051	16.8016	16.8034	16.8083
rs141120011	16993939		A	ATTTC	0.104841	0.0917293	0.975307	40424	-0.108409	0.0300503	13.0148	13.1863	0.000282003	13.0264	-0.110995	0.0287456	14.9096	15.1614	14.9243
rs77879649	16710003		T	G	0.0118403	0.0100834	0.260023	40424	-0.595778	0.168512	12.4999	13.1342	0.000289954	12.6202	-0.557019	0.168068	10.9842	11.6479	11.0527
rs72704092	16677803		A	T	0.100364	0.110144	0.508502	40424	0.143553	0.0394721	13.2264	13.0929	0.000296417	13.2376	0.153903	0.0374433	16.8946	16.6672	16.9125
rs16934899	16671439		G	C	0.0718573	0.0788194	0.476706	40424	0.172477	0.0473817	13.2508	13.0751	0.000299247	13.267	0.160146	0.044942	12.6977	12.5034	12.7128
rs144343452	16921606		G	A	0.0182798	0.0147658	0.533388	40424	-0.345452	0.0973556	12.5908	13.0548	0.000302508	12.6413	-0.353345	0.0935255	14.2737	14.927	14.3351
rs117439620	16931888		C	G	0.00491698	0.00368448	0.37214	40424	-0.829364	0.241491	11.7948	13.0318	0.000306246	12.0447	-0.745544	0.23556	10.0171	11.1422	10.1936
rs112814316	16875986		T	TCTCA	0.91672	0.903753	0.94578	40424	-0.111591	0.0307779	13.1456	13.0046	0.000310727	13.1578	-0.132907	0.0293556	20.4982	20.1595	20.5279
rs74868858	17002038		T	C	0.104475	0.0913269	0.988378	40424	-0.106736	0.0298478	12.7879	12.954	0.000319239	12.7991	-0.109727	0.0285495	14.7716	15.0187	14.7859
rs61336812	16671540		A	T	0.073389	0.080437	0.478124	40424	0.169753	0.0468748	13.1147	12.9435	0.000321034	13.1302	0.158278	0.0444589	12.6743	12.4834	12.689
rs189446046	16891126		C	A	0.00344363	0.00263673	0.215982	40424	-1.32346	0.388523	11.6034	12.8654	0.000334713	11.8047	-1.39669	0.375547	13.8316	15.6569	14.1279
rs2185272	16877339		A	C	0.91963	0.906737	0.970753	40424	-0.111269	0.0308916	12.9738	12.8342	0.000340341	12.9858	-0.132946	0.0294565	20.37	20.0312	20.3997
rs10810653	16876643		C	G	0.920106	0.907234	0.975059	40424	-0.111114	0.0308624	12.9622	12.8228	0.000342421	12.9742	-0.132513	0.02943	20.2739	19.9376	20.3034
rs56103268	16993488		G	A	0.104369	0.0913912	0.978823	40424	-0.106763	0.030046	12.626	12.7897	0.000348533	12.637	-0.109444	0.0287389	14.5027	14.7441	14.5166
rs55873944	16993715		A	G	0.104371	0.0913923	0.978983	40424	-0.106753	0.0300438	12.6255	12.7892	0.000348626	12.6365	-0.109429	0.0287368	14.5008	14.7422	14.5147
rs56098873	16994696		G	A	0.104375	0.091397	0.97973	40424	-0.106678	0.0300346	12.6155	12.779	0.000350532	12.6265	-0.109345	0.0287278	14.4874	14.7285	14.5013
rs112210553	16995830		C	T	0.104379	0.0914037	0.98073	40424	-0.106531	0.0300229	12.5907	12.7536	0.000355325	12.6015	-0.109206	0.0287163	14.4623	14.7026	14.4761
rs150553433	16996399		TA	T	0.104379	0.0914068	0.98131	40424	-0.106441	0.0300171	12.5743	12.7369	0.000358511	12.5851	-0.109121	0.0287106	14.4456	14.6855	14.4594
rs149365030	16996875		AT	A	0.104383	0.0914109	0.981767	40424	-0.106387	0.0300117	12.566	12.7285	0.000360125	12.5769	-0.109073	0.0287054	14.4379	14.6776	14.4517
rs80153037	17003999		A	G	0.104379	0.091313	0.987685	40424	-0.105743	0.0298676	12.5345	12.6955	0.000366537	12.5452	-0.108906	0.0285671	14.5335	14.7744	14.5474
rs72501431	16876176		G	A	0.917729	0.904577	0.96348	40424	-0.109394	0.0305589	12.8147	12.6792	0.000369746	12.8262	-0.132161	0.0291422	20.5665	20.2268	20.5962
rs77969266	16992655		G	A	0.104132	0.0912397	0.976956	40424	-0.106422	0.0300979	12.5023	12.6636	0.000372844	12.5131	-0.108859	0.0287896	14.2974	14.5339	14.311
rs79850388	16992238		A	G	0.104129	0.0912391	0.976772	40424	-0.10642	0.0301006	12.4996	12.6609	0.000373382	12.5104	-0.108861	0.0287922	14.2953	14.5317	14.3089
rs7864431	16875365		C	T	0.91954	0.906654	0.991948	40424	-0.109421	0.0305973	12.789	12.6533	0.000374903	12.8006	-0.129982	0.0291838	19.8374	19.5136	19.8653
rs11788101	16828961		C	T	0.537896	0.521817	0.655011	40424	-0.0772538	0.0217171	12.6543	12.651	0.000375365	12.6589	-0.0823217	0.0205654	16.0234	16.0239	16.0295
rs76938895	17007112		T	C	0.104689	0.0916499	0.98774	40424	-0.105408	0.0298304	12.4861	12.646	0.00037637	12.4967	-0.108343	0.0285315	14.4197	14.6574	14.4333
rs78600569	16990325		A	G	0.104592	0.0917352	0.965278	40424	-0.106713	0.0302018	12.4843	12.6453	0.000376511	12.4951	-0.109528	0.0288919	14.3713	14.6096	14.385
rs138229041	16877354		C	CT	0.918886	0.905916	0.969366	40424	-0.110054	0.030794	12.7725	12.6366	0.000378267	12.7841	-0.132549	0.0293662	20.373	20.0353	20.4026
rs77632083	17007505		C	T	0.104425	0.0913904	0.988138	40424	-0.105499	0.0298741	12.4711	12.631	0.000379402	12.4817	-0.108666	0.0285732	14.4634	14.7027	14.4772
rs4422864	16879179		T	A	0.920239	0.907468	0.969675	40424	-0.110649	0.0310068	12.7344	12.5978	0.000386201	12.7461	-0.132325	0.0295632	20.0347	19.7025	20.0637
rs263635	17022777		A	C	0.139058	0.126509	0.992579	40424	-0.0916163	0.025944	12.4702	12.5956	0.000386656	12.4784	-0.0910453	0.0248476	13.4259	13.5925	13.435
rs184131052	16919194		A	C	0.00431757	0.00314341	0.380972	40424	-0.875146	0.260918	11.2501	12.5916	0.000387484	11.526	-0.815984	0.254301	10.296	11.6342	10.5236
rs10810644	16843128		T	C	0.231708	0.244146	0.998302	40424	0.0728831	0.0205139	12.6228	12.5647	0.000393102	12.6282	0.0854126	0.0195255	19.1355	19.0053	19.1472
rs7847725	16878495		C	G	0.919524	0.906642	0.969725	40424	-0.110013	0.0308986	12.6768	12.5417	0.00039797	12.6882	-0.132324	0.0294629	20.1711	19.8368	20.2003
rs76032660	16990617		G	A	0.104206	0.0913982	0.962812	40424	-0.106584	0.0302915	12.3806	12.5399	0.000398354	12.3912	-0.10964	0.0289754	14.3178	14.5554	14.3315
rs74339678	16998766		C	G	0.103648	0.0907309	0.982873	40424	-0.105746	0.0300661	12.3702	12.5291	0.000400663	12.3807	-0.108816	0.0287562	14.3193	14.5565	14.3329
rs79476472	17004288		T	C	0.103624	0.0906461	0.983048	40424	-0.105667	0.0300508	12.3642	12.523	0.000401973	12.3747	-0.109313	0.0287391	14.4675	14.7083	14.4814
rs6475090	16878170		T	C	0.919636	0.906761	0.972477	40424	-0.109919	0.0308956	12.6575	12.5228	0.000402016	12.669	-0.13234	0.0294607	20.1787	19.8443	20.2079
rs4246148	16781531		G	C	0.841215	0.833266	0.902656	40424	-0.0882325	0.0248776	12.5788	12.4926	0.000408567	12.5858	-0.0670687	0.0236429	8.04708	7.99149	8.0498
rs12006374	16887167		C	T	0.0799568	0.0928193	0.977344	40424	0.109637	0.0308565	12.6248	12.4901	0.000409114	12.6362	0.132193	0.0294061	20.2089	19.8731	20.2384
c9_pos16996901	17006901		T	C	0.104774	0.0917415	0.996219	40424	-0.104169	0.029746	12.2636	12.4186	0.000425079	12.2738	-0.107313	0.0284545	14.2234	14.4554	14.2366
rs202216491	17386638		ACGT	A	0.00352251	0.00252277	0.325022	40424	-1.07297	0.323543	10.998	12.3998	0.00042938	11.2764	-1.00488	0.31138	10.4147	11.8832	10.6664
rs79687628	16889330		C	A	0.0800868	0.0928906	0.972393	40424	0.109464	0.0309282	12.5266	12.3935	0.000430831	12.5378	0.132514	0.0294749	20.2126	19.8773	20.242
rs10962623	16822855		G	A	0.525236	0.508922	0.649571	40424	-0.0766742	0.021793	12.3784	12.3776	0.000434515	12.3828	-0.0833023	0.0206262	16.3108	16.3167	16.3172
rs77878183	16889646		A	C	0.0802498	0.0930685	0.973026	40424	0.109262	0.0308966	12.5059	12.3733	0.000435517	12.5171	0.132375	0.0294458	20.2098	19.875	20.2392
rs4500176	16876586		G	T	0.919061	0.906212	0.971093	40424	-0.108716	0.0307652	12.4872	12.3557	0.000439642	12.4982	-0.130762	0.0293405	19.8624	19.5371	19.8905
rs11299500	16905628		TA	T	0.0789007	0.0905772	0.805428	40424	0.121355	0.0343492	12.482	12.3492	0.000441175	12.4932	0.145144	0.0327221	19.675	19.3524	19.7031
rs12344799	16780344		G	T	0.687545	0.670684	0.92216	40424	-0.0682213	0.0193885	12.3809	12.3472	0.000441648	12.3853	-0.0560039	0.0184872	9.17687	9.14933	9.1791
rs78272478	17013999		C	G	0.104795	0.0918404	0.977885	40424	-0.104827	0.0300231	12.1908	12.3457	0.000442003	12.201	-0.109208	0.0287081	14.471	14.7111	14.4848
rs80094183	17014703		A	G	0.104627	0.0916735	0.976895	40424	-0.104812	0.0300499	12.1656	12.3202	0.000448083	12.1758	-0.109346	0.0287325	14.4829	14.7236	14.4968
rs10217423	16840464		T	G	0.229821	0.241989	0.982947	40424	0.0727997	0.0206953	12.3742	12.3169	0.000448876	12.3793	0.0849777	0.019705	18.5976	18.4705	18.6088
rs10810651	16874907		T	G	0.920129	0.907508	0.973323	40424	-0.109144	0.0309373	12.4461	12.3144	0.000449477	12.4572	-0.129768	0.0295034	19.3459	19.0312	19.3728
rs78886836	16890618		C	A	0.0800396	0.0927831	0.971127	40424	0.109279	0.0309778	12.4444	12.3126	0.000449911	12.4556	0.132523	0.029524	20.1479	19.814	20.1772
rs75714016	17012054		A	C	0.104883	0.091943	0.979999	40424	-0.104468	0.0299899	12.1344	12.288	0.00045588	12.1445	-0.108726	0.0286762	14.3754	14.6129	14.3891
rs12006360	16887073		C	T	0.0800739	0.0929944	0.99954	40424	0.107605	0.0305446	12.4107	12.2803	0.000457765	12.4216	0.130368	0.0291259	20.0346	19.7048	20.0631
rs76538056	17011455		C	T	0.104828	0.0918945	0.98111	40424	-0.104346	0.0299822	12.1122	12.2654	0.000461434	12.1223	-0.108564	0.0286697	14.3393	14.5758	14.3529
rs75027033	17011259		T	C	0.104807	0.0918755	0.981388	40424	-0.104338	0.0299808	12.1114	12.2646	0.000461632	12.1215	-0.108534	0.0286686	14.3325	14.5688	14.346
rs4961427	16902529		C	T	0.0810344	0.0938189	0.968591	40424	0.108348	0.0307842	12.3875	12.2569	0.000463541	12.3983	0.128682	0.0293365	19.2407	18.9309	19.267
rs143842848	17266771		A	T	0.0123908	0.00947107	0.746328	40424	-0.34811	0.101711	11.7138	12.2515	0.000464884	11.7812	-0.355148	0.0976818	13.2187	13.9755	13.3047
rs10810643	16841628		A	G	0.231613	0.24375	0.991217	40424	0.0720516	0.0205664	12.2736	12.2177	0.000473383	12.2787	0.0838294	0.0195859	18.3192	18.1961	18.3299
rs76439812	16880520		C	T	0.0793433	0.0919448	0.970317	40424	0.109216	0.0310802	12.3483	12.2171	0.000473535	12.3594	0.130915	0.0296328	19.5178	19.1968	19.5455
rs74305154	16889787		A	G	0.0807975	0.0936551	0.967815	40424	0.108483	0.0308922	12.3319	12.202	0.000477383	12.3427	0.131904	0.0294436	20.0696	19.7384	20.0985
rs10962711	16928839		A	G	0.528134	0.539542	0.981056	40424	0.0614728	0.0176082	12.1881	12.2001	0.00047787	12.1919	0.0562622	0.0168343	11.1697	11.1809	11.1726
rs10217231	16840472		G	A	0.229837	0.241963	0.982712	40424	0.0724359	0.0207003	12.2449	12.1886	0.000480825	12.25	0.0847542	0.0197101	18.4904	18.3644	18.5014
rs59719786	16880174		G	T	0.0798016	0.0924678	0.967741	40424	0.108915	0.0310472	12.3064	12.1761	0.000484057	12.3174	0.131125	0.0296028	19.6203	19.2973	19.6482
rs1487505	17000713		T	A	0.893095	0.905357	0.998752	40424	0.101493	0.0292809	12.0144	12.1611	0.000487966	12.0241	0.102653	0.0280335	13.4087	13.6161	13.4202
rs4961426	16902347		C	G	0.0807491	0.0934857	0.96912	40424	0.108128	0.0308441	12.2894	12.1601	0.000488228	12.3001	0.128589	0.0293909	19.1417	18.8337	19.1678
rs12683784	16884679		A	G	0.0785406	0.0910237	0.964231	40424	0.109757	0.0313237	12.2777	12.1471	0.000491643	12.2887	0.13212	0.0298554	19.5836	19.2593	19.6118
rs4623533	16779962		T	C	0.695246	0.678625	0.93297	40424	-0.0674965	0.0193996	12.1054	12.0713	0.00051204	12.1096	-0.055111	0.0185019	8.87244	8.84509	8.87454
rs3936216	16816655		G	A	0.529628	0.513798	0.646321	40424	-0.075979	0.0218825	12.0558	12.0543	0.00051673	12.06	-0.0821123	0.0207082	15.7228	15.7267	15.7288
rs111414393	16534282		C	T	0.0132747	0.0143997	0.24764	40424	0.517031	0.146892	12.389	12.0442	0.000519538	12.4571	0.417583	0.138543	9.08487	8.8123	9.12355
rs4961502	16882346		G	A	0.0791473	0.0916584	0.970426	40424	0.10861	0.0311345	12.169	12.0403	0.000520626	12.1798	0.130257	0.0296843	19.2553	18.9398	19.2824
rs10756827	16892201		T	A	0.917415	0.904766	0.946807	40424	-0.108	0.030976	12.1562	12.0291	0.000523764	12.1667	-0.129925	0.0295119	19.3817	19.0679	19.4085
rs75432724	16447455		C	T	0.0239813	0.0202431	0.541043	40424	-0.287034	0.0844106	11.5631	11.9848	0.000536362	11.6041	-0.306427	0.080855	14.3629	15.0322	14.428
rs3936215	16816755		C	T	0.525846	0.509715	0.655143	40424	-0.07514	0.0217283	11.9589	11.958	0.000544132	11.9631	-0.0817589	0.0205635	15.8079	15.8129	15.8139
rs2481550	17000932		G	C	0.893312	0.905484	0.993455	40424	0.1008	0.0293447	11.7995	11.9424	0.000548708	11.8088	0.102125	0.0280894	13.2184	13.4216	13.2296
rs34045498	16661480		G	GT	0.0968874	0.106412	0.484304	40424	0.142836	0.0411518	12.0475	11.9315	0.000551927	12.0568	0.147382	0.0390752	14.2261	14.0541	14.2387
rs201659636	16661478		A	AG	0.0968875	0.106412	0.484303	40424	0.142824	0.0411518	12.0455	11.9296	0.00055249	12.0548	0.147376	0.0390753	14.2248	14.0528	14.2374
rs10733331	16903324		A	C	0.917477	0.904829	0.956452	40424	-0.106667	0.0307586	12.0262	11.9017	0.000560827	12.0363	-0.126299	0.0293145	18.5624	18.2698	18.5867
rs7863196	16818266		T	G	0.54229	0.527197	0.644739	40424	-0.0755751	0.0219296	11.8767	11.8731	0.000569505	11.8807	-0.0785725	0.0207699	14.3111	14.309	14.316
rs61202585	16882285		G	A	0.0798541	0.0924178	0.968399	40424	0.107441	0.0310646	11.9621	11.8369	0.000580684	11.9724	0.129877	0.0296199	19.2263	18.9123	19.2531
rs6475091	16878382		G	C	0.917885	0.905231	0.954035	40424	-0.106584	0.0309233	11.8799	11.7575	0.000605986	11.8899	-0.129502	0.0294906	19.2834	18.9717	19.3099
rs113202347	16892006		T	C	0.0170362	0.0194623	0.402707	40424	0.350326	0.100905	12.0536	11.7525	0.000607616	12.1075	0.320928	0.0949671	11.4201	11.063	11.4685
rs10962710	16928068		C	T	0.512544	0.522877	0.97983	40424	0.0602144	0.0176015	11.7031	11.7111	0.000621284	11.7066	0.0514788	0.0168258	9.36059	9.36622	9.36264
rs151259112	16923671		G	A	0.00947254	0.0080001	0.345915	40424	-0.558751	0.167751	11.0945	11.6818	0.000631144	11.1696	-0.47755	0.161834	8.70756	9.18607	8.75274
rs1487504	17000855		A	G	0.893187	0.905318	0.999743	40424	0.0994406	0.0292813	11.5332	11.6708	0.000634887	11.5421	0.101258	0.0280278	13.0521	13.2509	13.063
rs1890643	16880921		C	G	0.0800489	0.092571	0.967219	40424	0.106496	0.0310299	11.779	11.6567	0.000639717	11.789	0.12896	0.0295869	18.9981	18.6897	19.0243
rs11793537	16778859		G	C	0.689163	0.672624	0.950017	40424	-0.0653703	0.0191385	11.6667	11.6356	0.000647015	11.6706	-0.052966	0.0182526	8.42064	8.39625	8.42252
rs78817479	17040371		C	A	0.0773598	0.0658042	0.959164	40424	-0.11902	0.0352235	11.4175	11.5936	0.000661792	11.4297	-0.136149	0.0337013	16.3206	16.6829	16.3441
rs142312061	16543241		T	C	0.00376433	0.00254855	0.376483	40424	-0.936096	0.290225	10.4033	11.581	0.000666291	10.622	-0.971156	0.280011	12.0289	13.7125	12.3252
rs80263524	16586953		T	C	0.0244969	0.0211248	0.472485	40424	-0.298587	0.0897721	11.0626	11.4872	0.000700771	11.1037	-0.289276	0.0850998	11.555	12.0553	11.6006
rs138164335	16664458		T	C	0.000614166	0.000891028	0.135454	40424	2.96968	0.857881	11.983	11.4771	0.00070459	12.8195	2.24801	0.773968	8.43625	8.15331	9.19818
rs7860104	16661210		A	G	0.0977264	0.107239	0.485346	40424	0.139271	0.0409702	11.5555	11.4474	0.000715941	11.564	0.145121	0.0389084	13.9115	13.7464	13.9234
rs79689834	17278146		C	T	0.0144971	0.0111131	0.869661	40424	-0.288704	0.0872174	10.9572	11.4327	0.000721627	11.0133	-0.301864	0.0834949	13.0708	13.7961	13.152
rs12683371	16900927		C	T	0.0803536	0.0927145	0.952258	40424	0.106027	0.031237	11.5211	11.4024	0.000733493	11.5307	0.127538	0.0297659	18.3587	18.0666	18.3831
rs12683372	16900930		C	T	0.0803532	0.092714	0.952263	40424	0.106024	0.0312369	11.5206	11.4019	0.00073369	11.5301	0.127536	0.0297658	18.3581	18.066	18.3825
rs11790607	16558576		T	C	0.0247584	0.0213405	0.483386	40424	-0.292456	0.0882744	10.9762	11.3939	0.000736857	11.0161	-0.284178	0.0837033	11.5264	12.0223	11.5715
rs10962630	16833797		T	C	0.546604	0.530734	0.645147	40424	-0.0738369	0.0218996	11.3678	11.363	0.000749217	11.3715	-0.0799346	0.02072	14.8831	14.8805	14.8884
rs1330299	16760796		C	T	0.686008	0.670926	0.890874	40424	-0.0665804	0.0197426	11.3733	11.3446	0.000756677	11.377	-0.0531472	0.0188112	7.98227	7.96073	7.98394
rs10962572	16762034		A	G	0.679931	0.66338	0.926782	40424	-0.0646294	0.0192306	11.2947	11.2665	0.000789184	11.2983	-0.0548855	0.0183295	8.96628	8.941	8.96838
rs112575090	17297091		T	C	0.0538443	0.0455034	0.891339	40424	-0.144576	0.0435282	11.0319	11.2413	0.000799971	11.0466	-0.162744	0.0414983	15.3797	15.7894	15.4088
rs10962573	16762039		C	T	0.680935	0.66453	0.922649	40424	-0.0647497	0.0192961	11.2599	11.2319	0.000804033	11.2635	-0.0549246	0.0183906	8.91953	8.89444	8.92161
rs10962533	16675103		C	T	0.0183889	0.0204505	0.448344	40424	0.312611	0.0921762	11.5019	11.2316	0.000804163	11.5485	0.28552	0.0873591	10.6821	10.3749	10.7209
rs7042891	16989246		G	A	0.297823	0.288965	0.987259	40424	-0.0648925	0.0194019	11.1866	11.2309	0.000804466	11.1904	-0.0593555	0.0185428	10.2464	10.2923	10.2493
rs10962628	16832972		T	C	0.546724	0.530902	0.647948	40424	-0.0728926	0.0218613	11.1177	11.113	0.000857247	11.1213	-0.0792246	0.0206842	14.6704	14.668	14.6755
rs143184847	17291980		A	G	0.0152846	0.0118424	0.839176	40424	-0.281402	0.0861877	10.6602	11.1038	0.00086151	10.7112	-0.300301	0.0826068	13.2154	13.9355	13.2951
rs72700140	17008501		A	T	0.1077	0.0956323	0.97925	40424	-0.0975551	0.0294712	10.9573	11.0848	0.000870382	10.9652	-0.0973533	0.0281738	11.9401	12.1136	11.9492
rs7029491	16986112		C	G	0.329005	0.339196	0.954025	40424	0.0629037	0.0188918	11.0868	11.0615	0.000881388	11.0903	0.0527411	0.0180304	8.55636	8.53394	8.55827
rs10810619	16763140		A	G	0.679315	0.662784	0.928716	40424	-0.063984	0.0192249	11.0769	11.0494	0.000887159	11.0804	-0.0547071	0.018322	8.91541	8.89033	8.91749
rs263654	17009876		A	T	0.109613	0.0979128	0.961467	40424	-0.097398	0.0294986	10.9018	11.0277	0.000897604	10.9097	-0.0981713	0.0282208	12.1012	12.2776	12.1106
rs7860932	16786898		G	A	0.908493	0.902786	0.768878	40424	-0.113155	0.0340072	11.0714	10.9571	0.000932456	11.0801	-0.0908687	0.0321895	7.96895	7.88358	7.97339
rs10810616	16761597		T	C	0.678696	0.66235	0.928358	40424	-0.0635577	0.0191958	10.9629	10.9361	0.000943085	10.9663	-0.0537094	0.018296	8.61766	8.59395	8.6196
rs7041461	16985146		T	C	0.572734	0.588113	0.982096	40424	0.059324	0.0179575	10.9137	10.9308	0.000945786	10.9168	0.0586061	0.0171387	11.6931	11.7154	11.6964
rs7032158	16904047		A	G	0.918668	0.90655	0.958692	40424	-0.103153	0.0310652	11.0259	10.9157	0.000953527	11.0346	-0.123946	0.029609	17.5234	17.2525	17.5454
rs78803850	16499866		C	A	0.0172179	0.0142759	0.494364	40424	-0.341956	0.105762	10.454	10.9033	0.000959931	10.4991	-0.353273	0.100815	12.2792	12.9314	12.3462
rs191373300	17056429		C	G	0.00181871	0.00125902	0.194283	40424	-1.8512	0.59337	9.73322	10.8794	0.000972397	9.83419	-1.80212	0.564617	10.1873	11.6207	10.334
rs117456743	16481554		G	A	0.0224393	0.0189872	0.573703	40424	-0.274741	0.0848007	10.4966	10.8785	0.00097287	10.5325	-0.283902	0.0808787	12.3217	12.8728	12.3736
rs189690151	17011766		G	T	0.0150005	0.0116695	0.910025	40424	-0.268011	0.0830616	10.4113	10.8326	0.000997285	10.4598	-0.270981	0.079602	11.5886	12.1741	11.6499
rs183326040	16977613		G	A	0.0747653	0.0697929	0.835063	40424	-0.1211	0.0370525	10.682	10.8302	0.000998579	10.6921	-0.10412	0.0354844	8.60979	8.73713	8.61618
rs77311561	16906019		G	A	0.0804915	0.0927234	0.970137	40424	0.102496	0.0309934	10.9364	10.8279	0.00099982	10.9449	0.125103	0.0295516	17.9215	17.6419	17.9444
rs147586918	17002015		C	T	0.0148102	0.0115057	0.903267	40424	-0.270256	0.083937	10.3668	10.7877	0.00102177	10.4153	-0.273351	0.0804216	11.5531	12.1393	11.6144
rs10962743	16941398		T	C	0.219368	0.230733	0.940863	40424	0.0703086	0.021385	10.8093	10.7591	0.00103768	10.8135	0.0627356	0.0204254	9.43383	9.38262	9.4368
rs56343038	16776792		T	G	0.688004	0.671819	0.966124	40424	-0.0622525	0.0189812	10.7564	10.7288	0.00105481	10.7597	-0.0502588	0.0181082	7.70327	7.68185	7.70484
rs76814594	16416973		G	A	0.0242717	0.020563	0.565527	40424	-0.263419	0.0817839	10.3743	10.7168	0.00106167	10.4059	-0.284528	0.0782373	13.2258	13.7977	13.279
rs13300360	16962782		T	A	0.403925	0.417953	0.975935	40424	0.0588992	0.0179863	10.7235	10.7123	0.00106426	10.7265	0.0577864	0.0171559	11.3455	11.3295	11.3486
rs10756836	16906060		A	C	0.918255	0.905877	0.985464	40424	-0.100504	0.0305962	10.7904	10.6851	0.00108002	10.7985	-0.123364	0.0291776	17.8763	17.6004	17.8986
rs7031229	16761255		C	A	0.833133	0.825686	0.838406	40424	-0.0825898	0.0252514	10.6975	10.6315	0.00111177	10.7024	-0.0612809	0.0239872	6.52667	6.48714	6.52841
rs4961496	16789652		C	T	0.89801	0.891849	0.747593	40424	-0.107996	0.0329729	10.7276	10.6287	0.00111346	10.7351	-0.0865597	0.0312588	7.66808	7.59443	7.67172
rs10756834	16903652		G	C	0.917544	0.905181	0.990584	40424	-0.0994181	0.0304061	10.6908	10.587	0.00113886	10.6987	-0.12139	0.0289879	17.5361	17.2685	17.5574
rs10756811	16768265		G	C	0.694754	0.680135	0.911035	40424	-0.0638723	0.0197083	10.5033	10.4765	0.00120903	10.5065	-0.0494522	0.0187828	6.93189	6.91352	6.93316
rs10962595	16792126		G	C	0.84349	0.835838	0.929119	40424	-0.0798779	0.0246983	10.4597	10.3919	0.00126569	10.4646	-0.0539676	0.0234739	5.28561	5.25487	5.2868
rs414099	17024441		A	G	0.16504	0.151967	0.992129	40424	-0.0773702	0.0240979	10.3083	10.3884	0.00126809	10.3132	-0.07836	0.0230831	11.524	11.6369	11.5297
rs78359995	17309311		A	G	0.0566978	0.048274	0.92615	40424	-0.132492	0.0415248	10.1804	10.36	0.00128775	10.1925	-0.148789	0.0395964	14.1198	14.4691	14.1433
rs12343424	16770229		T	C	0.686299	0.670375	0.964266	40424	-0.0611515	0.0189756	10.3853	10.3592	0.00128831	10.3884	-0.0492762	0.0180992	7.41231	7.39211	7.41376
rs10756816	16791894		A	C	0.843438	0.835794	0.927744	40424	-0.0797929	0.0247111	10.4266	10.3591	0.00128838	10.4315	-0.0539472	0.0234856	5.27634	5.24569	5.27753
rs12353453	16769943		A	G	0.686298	0.670375	0.963666	40424	-0.0611531	0.01898	10.3811	10.355	0.00129124	10.3842	-0.0492937	0.0181032	7.4143	7.3941	7.41575
rs146167182	17235710		G	A	0.000819669	0.00147346	0.258016	40424	1.53951	0.478557	10.3489	10.3117	0.00132189	11.0241	1.86795	0.460861	16.4282	16.0492	18.1106
rs13295755	16900541		C	T	0.510693	0.517683	0.395221	40424	0.0892914	0.0278422	10.2852	10.2931	0.00133529	10.2881	0.0980434	0.0265743	13.6118	13.6255	13.6163
rs11793056	16765339		A	G	0.682321	0.666368	0.940784	40424	-0.0613043	0.0191396	10.2593	10.2343	0.00137853	10.2623	-0.0514106	0.0182478	7.93753	7.91595	7.93918
rs3933182	16979089		A	G	0.34302	0.327824	0.991828	40424	-0.0594706	0.0186732	10.143	10.1725	0.00142551	10.1459	-0.0614303	0.0178408	11.8559	11.9008	11.8596
rs10962582	16772775		A	C	0.689458	0.673928	0.999591	40424	-0.0596378	0.0187703	10.0948	10.0689	0.00150793	10.0978	-0.0476193	0.0179108	7.06864	7.04918	7.06997
rs10810649	16870421		A	G	0.92006	0.907796	0.98451	40424	-0.0980627	0.0308187	10.1247	10.0268	0.00154279	10.132	-0.123942	0.0293726	17.8052	17.5251	17.8282
rs188283119	16869150		T	C	0.000996719	0.0006671	0.318135	40424	-1.84174	0.644925	8.1553	10.0106	0.00155642	8.68769	-1.61281	0.622969	6.70242	8.16711	7.05409
rs117781997	16673954		A	G	0.00858798	0.0070547	0.300715	40424	-0.580313	0.189132	9.41442	9.94871	0.00160962	9.50468	-0.572219	0.186529	9.41093	10.0829	9.48947
rs12344347	16769662		C	T	0.683051	0.66734	0.956359	40424	-0.0599266	0.0189846	9.96403	9.93991	0.00161733	9.96686	-0.0479913	0.0181044	7.0268	7.00856	7.0281
rs10962953	17259794		A	G	0.356864	0.352762	0.774803	40424	-0.0652828	0.0207567	9.89188	9.91834	0.0016364	9.89462	-0.0511462	0.0197793	6.68662	6.70316	6.68775
rs10756815	16789081		G	A	0.843195	0.835422	0.902255	40424	-0.0791322	0.0250477	9.98094	9.9172	0.00163741	9.98539	-0.0554318	0.0237955	5.42661	5.3947	5.42786
rs13300330	16962743		T	C	0.405526	0.418968	0.966267	40424	0.0566951	0.017996	9.92515	9.91517	0.00163922	9.92775	0.0551858	0.0171651	10.3362	10.3223	10.3388
rs4565551	16916117		T	C	0.9194	0.908801	0.788021	40424	-0.108568	0.0343225	10.0057	9.91017	0.00164368	10.0132	-0.128992	0.0327147	15.5468	15.3153	15.5647
rs7024447	16819750		C	T	0.549157	0.534866	0.649516	40424	-0.0688851	0.0218779	9.91377	9.90946	0.00164431	9.9166	-0.0718642	0.0207078	12.0436	12.0401	12.047
rs17743789	16817233		A	G	0.014817	0.0173133	0.518099	40424	0.299805	0.0941787	10.1338	9.8852	0.00166613	10.1756	0.297261	0.0890722	11.1376	10.7772	11.1877
rs10810633	16790956		G	A	0.842131	0.83426	0.918462	40424	-0.0778976	0.0247303	9.92181	9.85937	0.00168969	9.92619	-0.0543072	0.0235009	5.34006	5.30909	5.34127
rs4246133	16912919		A	G	0.119424	0.114318	0.966704	40424	-0.0859205	0.0274955	9.76493	9.85715	0.00169173	9.77055	-0.0869375	0.0263657	10.8727	11.0031	10.8792
rs10962585	16776985		A	T	0.670858	0.655775	0.907135	40424	-0.0607396	0.0193356	9.86798	9.84493	0.001703	9.87075	-0.0481231	0.0184548	6.79969	6.78273	6.8009
rs3927535	16787528		G	A	0.920266	0.916054	0.772465	40424	-0.114171	0.0362217	9.93522	9.82925	0.00171758	9.94307	-0.085267	0.034236	6.20291	6.1385	6.20594
rs10962626	16829346		T	C	0.545297	0.530766	0.653218	40424	-0.0680308	0.0217855	9.75163	9.74765	0.00179552	9.75437	-0.0718346	0.0206212	12.1351	12.1325	12.1386
rs113133695	16882340		G	C	0.0161301	0.0174658	0.512104	40424	0.297766	0.0941464	10.0033	9.74696	0.0017962	10.0397	0.219861	0.0887003	6.14394	5.991	6.1579
rs1487508	16986789		G	A	0.351936	0.337118	0.972916	40424	-0.0580186	0.0186955	9.63072	9.6565	0.00188683	9.63331	-0.0574745	0.0178764	10.3369	10.3713	10.3396
rs1537002	16785411		A	G	0.919759	0.915525	0.771949	40424	-0.112694	0.036139	9.72409	9.62173	0.00192289	9.73158	-0.0846025	0.034156	6.13524	6.07211	6.13818
rs10121817	16870104		A	G	0.921902	0.910143	0.961565	40424	-0.0979589	0.0314599	9.69559	9.60227	0.00194337	9.70251	-0.121685	0.0300156	16.4354	16.1831	16.4555
rs10810611	16756377		G	A	0.632659	0.618386	0.806954	40424	-0.0619043	0.0200008	9.57964	9.56391	0.0019844	9.58218	-0.0488167	0.0190222	6.58594	6.57422	6.58702
rs10962570	16759357		G	A	0.675798	0.660438	0.911812	40424	-0.0595951	0.0192598	9.57452	9.55301	0.00199622	9.5771	-0.0483844	0.0183571	6.94707	6.93019	6.94832
rs13294647	16759161		C	T	0.675764	0.660421	0.911074	40424	-0.059555	0.0192657	9.5558	9.53437	0.00201659	9.55838	-0.0483342	0.0183626	6.92857	6.91177	6.92982
rs111417272	16985629		C	T	0.35117	0.336499	0.97448	40424	-0.0574876	0.0186566	9.49479	9.52042	0.00203198	9.49732	-0.0571968	0.0178287	10.2921	10.3268	10.2948
rs112755903	16915906		G	T	0.0364326	0.0404655	0.657085	40424	0.171102	0.0552654	9.58525	9.43777	0.00212562	9.59949	0.160279	0.0524267	9.34653	9.17151	9.36029
rs986472	16991622		G	A	0.300751	0.292765	0.990137	40424	-0.0591844	0.0193199	9.3843	9.41732	0.00214945	9.38691	-0.0549447	0.0184567	8.86221	8.8982	8.86435
rs138773688	16897207		T	TGG	0.948055	0.951814	0.756993	40424	0.140936	0.0463446	9.24796	9.41719	0.00214961	9.26085	0.147702	0.0445536	10.9902	11.2506	11.0077
rs944207	16758710		G	A	0.675549	0.660331	0.906151	40424	-0.0593054	0.019306	9.43639	9.41545	0.00215165	9.43889	-0.0479768	0.0184001	6.79862	6.78237	6.79981
rs10156640	16986039		G	A	0.352211	0.337635	0.981515	40424	-0.057007	0.018624	9.36934	9.39397	0.002177	9.37179	-0.0565208	0.0177978	10.0852	10.1181	10.0878
rs35255043	16643767		CA	C	0.0262668	0.0230381	0.455386	40424	-0.263682	0.0878601	9.00694	9.29861	0.00229328	9.03199	-0.25763	0.0830165	9.63081	9.99066	9.66028
rs34007653	16643772		A	G	0.0262667	0.0230382	0.455385	40424	-0.26367	0.0878601	9.00617	9.29779	0.0022943	9.03121	-0.257617	0.0830165	9.6299	9.98969	9.65936
rs6475081	16784127		C	T	0.919192	0.914986	0.769805	40424	-0.110513	0.0360875	9.37816	9.28131	0.00231504	9.38509	-0.0834524	0.0341082	5.98632	5.92563	5.98911
rs80144700	16670381		T	C	0.0161154	0.0149143	0.203937	40424	-0.478517	0.159833	8.9632	9.2808	0.00231568	9.00515	-0.399212	0.15552	6.58924	6.83407	6.60907
rs202085119	16476556		TTG	T	0.0343425	0.037212	0.516897	40424	0.19843	0.0648454	9.36387	9.22835	0.00238296	9.37739	0.170609	0.0615365	7.68664	7.56073	7.69528
rs142818875	17336623		A	G	0.00659882	0.00521712	0.254842	40424	-0.730617	0.24842	8.64984	9.21907	0.00239507	8.72085	-0.799618	0.238923	11.2009	12.1793	11.3224
rs10962789	16981498		C	T	0.191029	0.201232	0.965389	40424	0.0676889	0.0223114	9.20409	9.15851	0.00247564	9.20737	0.060713	0.0212668	8.15006	8.10263	8.15248
rs34790477	16813559		A	G	0.551168	0.536966	0.658357	40424	-0.0656138	0.0217117	9.1328	9.12873	0.00251626	9.13517	-0.0697638	0.0205514	11.5233	11.5197	11.5265
rs143296627	17095882		C	T	0.00101164	0.00081547	0.165108	40424	-2.34734	0.849975	7.62678	9.08325	0.00257961	7.92852	-1.96197	0.81372	5.81349	6.87285	6.00122
rs117445766	16457227		T	C	0.0167374	0.0140214	0.523287	40424	-0.305403	0.103362	8.73019	9.06262	0.00260888	8.76054	-0.320599	0.0984955	10.5948	11.1025	10.6431
rs10962532	16674632		A	G	0.0978924	0.106625	0.486442	40424	0.123708	0.0409491	9.12658	9.0472	0.00263097	9.13193	0.134183	0.0388098	11.954	11.8175	11.9629
rs3927536	16787670		C	T	0.765726	0.75113	0.887875	40424	-0.0649186	0.0215698	9.05827	9.02263	0.00266657	9.06101	-0.0567458	0.0205305	7.63959	7.60575	7.64141
rs148364690	17140465		A	G	0.00076203	0.00139482	0.256353	40424	1.49637	0.497871	9.03329	9.00447	0.0026932	9.47205	1.9351	0.480131	16.2438	15.7645	17.6082
rs7046369	16831375		T	C	0.746987	0.739166	0.561941	40424	-0.0805305	0.0267886	9.0369	8.99883	0.00270153	9.04024	-0.0800291	0.0253491	9.96713	9.91607	9.97047
rs13290007	16751586		C	T	0.691789	0.676572	0.867261	40424	-0.0597391	0.019945	8.97118	8.94945	0.00277553	8.97349	-0.0504833	0.0190159	7.04791	7.02886	7.04923
rs10962947	17252006		C	A	0.384499	0.38009	0.856886	40424	-0.0580155	0.0194213	8.92344	8.94252	0.00278608	8.9256	-0.0479593	0.0185142	6.71017	6.7242	6.71128
rs202193211	16767544		G	GTA	0.842508	0.83629	0.792946	40424	-0.0801375	0.0267189	8.9957	8.94069	0.00278887	8.99939	-0.0600926	0.0253731	5.60914	5.57518	5.61051
rs10810739	17246782		T	C	0.395693	0.392227	0.839875	40424	-0.0580644	0.0194954	8.8707	8.88811	0.00287034	8.87281	-0.0458163	0.0185771	6.08255	6.09345	6.08345
0	16767549		C	CAA	0.841385	0.83502	0.788034	40424	-0.0796437	0.0267172	8.88626	8.83246	0.00295919	8.88985	-0.0611944	0.0253745	5.81607	5.78039	5.81753
rs10810606	16754982		T	A	0.683268	0.668056	0.863046	40424	-0.0591128	0.0198678	8.85243	8.83209	0.00295979	8.85466	-0.0495227	0.018936	6.83959	6.82222	6.84082
rs181969945	17270604		A	T	0.00062239	0.000470962	0.140602	40424	-3.25281	1.19626	7.39375	8.82475	0.00297172	7.72429	-2.20288	1.1154	3.9005	4.45491	3.98134
rs34411139	16752614		AT	A	0.690989	0.675898	0.868124	40424	-0.0590792	0.0199232	8.79328	8.77227	0.00305845	8.79549	-0.0497411	0.0189949	6.85733	6.83912	6.85858
rs10810740	17252284		G	T	0.386018	0.381722	0.860943	40424	-0.0571292	0.0193523	8.71467	8.73294	0.00312512	8.71673	-0.0470965	0.0184488	6.51692	6.53025	6.51797
rs448034	16998460		A	G	0.66436	0.671434	0.999924	40424	0.0549804	0.0186371	8.70284	8.72733	0.00313475	8.70497	0.053051	0.0177914	8.89133	8.92108	8.89338
rs2151290	17247384		A	G	0.39756	0.394185	0.844586	40424	-0.0572918	0.0194146	8.70821	8.72497	0.00313881	8.71024	-0.0450226	0.018501	5.92205	5.9324	5.9229
rs13299347	16756914		G	A	0.662766	0.647841	0.871106	40424	-0.0576003	0.0195044	8.72133	8.70417	0.00317483	8.72344	-0.0475914	0.0185868	6.55617	6.54201	6.55727
rs187503955	17356009		C	T	0.000459909	0.000927612	0.244809	40424	1.87499	0.64356	8.48827	8.68467	0.00320898	9.1731	2.38644	0.623463	14.6514	14.6692	16.7176
rs6475123	17244616		T	C	0.0898395	0.0818234	0.942658	40424	-0.0945044	0.032304	8.55835	8.65681	0.00325841	8.56397	-0.102813	0.0308454	11.11	11.2844	11.1193
rs117708236	16914549		C	A	0.0137425	0.0159676	0.549289	40424	0.285846	0.0962247	8.82449	8.61701	0.00333038	8.85557	0.259235	0.0904498	8.21433	7.97569	8.2427
rs56053097	17138074		C	T	0.0605852	0.0527208	0.903221	40424	-0.117589	0.0403783	8.48078	8.61071	0.00334192	8.48863	-0.130424	0.0384708	11.4935	11.7375	11.5082
rs7848057	16908609		G	A	0.118008	0.11346	0.984837	40424	-0.0801401	0.0274472	8.52518	8.59969	0.0033622	8.52946	-0.0815785	0.0263195	9.60718	9.71481	9.6123
rs10810586	16673676		A	C	0.120965	0.12942	0.526313	40424	0.106462	0.0361822	8.65768	8.59215	0.00337615	8.66187	0.0967075	0.034335	7.93316	7.86672	7.93661
rs186007638	16774028		G	A	0.000830056	0.000539968	0.37331	40424	-1.75162	0.663307	6.97346	8.58523	0.00338901	7.41316	-1.54686	0.633959	5.95357	7.2717	6.2805
rs147853695	16907385		A	G	0.0796649	0.0907245	0.945077	40424	0.0928297	0.0315947	8.63267	8.55537	0.00344504	8.63802	0.114718	0.0301424	14.4848	14.2774	14.4999
rs148140553	16769170		T	C	0.000790927	0.0010455	0.123411	40424	2.4098	0.804544	8.97145	8.55179	0.00345183	9.35433	1.93268	0.729416	7.02056	6.69915	7.42105
rs146686342	16788452		A	G	0.0136203	0.0126465	0.155111	40424	-0.577823	0.201259	8.24289	8.52027	0.00351212	8.27638	-0.490796	0.193607	6.42629	6.6569	6.4444
rs7873181	16782639		A	T	0.920919	0.917007	0.781619	40424	-0.10597	0.0361871	8.57541	8.4894	0.00357222	8.58129	-0.0768944	0.0342158	5.05052	5.00264	5.05254
rs9987471	16749871		T	C	0.692193	0.677243	0.874871	40424	-0.057888	0.0198473	8.50697	8.48694	0.00357705	8.50904	-0.0477705	0.0189224	6.37333	6.35696	6.37441
rs11787694	16748778		T	C	0.692193	0.677243	0.874867	40424	-0.0578839	0.0198473	8.50571	8.48568	0.00357953	8.50778	-0.0477672	0.0189224	6.37243	6.35605	6.3735
rs10962644	16862492		C	T	0.00648385	0.00482919	0.486724	40424	-0.517583	0.183664	7.94171	8.47555	0.00359952	8.01946	-0.561796	0.175803	10.2119	11.151	10.3426
rs149641176	17075547		C	G	0.047659	0.050496	0.590104	40424	0.152154	0.0522026	8.49541	8.38388	0.00378563	8.50524	0.15057	0.0495968	9.21653	9.05594	9.22786
rs79116087	17137405		C	T	0.0607607	0.0530175	0.902338	40424	-0.115528	0.0403066	8.21522	8.33845	0.00388147	8.22255	-0.127578	0.0384031	11.0363	11.2649	11.0498
rs10810623	16780811		C	T	0.921979	0.918234	0.790485	40424	-0.105144	0.0362323	8.4212	8.33674	0.00388512	8.42692	-0.0748378	0.0342537	4.77338	4.72898	4.7752
rs2383009	16975303		C	A	0.450322	0.464146	0.928206	40424	0.052469	0.0181746	8.3344	8.33239	0.00389444	8.33618	0.0510901	0.0173449	8.67621	8.67281	8.67797
rs2026805	16800789		G	A	0.74843	0.733177	0.969376	40424	-0.0586801	0.0203018	8.35435	8.32734	0.00390528	8.35654	-0.0496088	0.0193463	6.57539	6.55169	6.57666
rs59077570	16866657		CT	C	0.210533	0.208706	0.919915	40424	-0.063553	0.022107	8.2644	8.30982	0.00394313	8.26698	-0.0517164	0.0211867	5.95839	5.99114	5.95965
rs12006368	16908010		T	C	0.0798529	0.090908	0.955049	40424	0.0907703	0.0314104	8.35103	8.27759	0.00401374	8.35602	0.113581	0.0299721	14.3609	14.1565	14.3757
rs13289196	16781184		C	T	0.920721	0.916846	0.788908	40424	-0.10396	0.0360191	8.33049	8.24783	0.00408007	8.33604	-0.074773	0.0340532	4.82141	4.77669	4.82325
rs10810607	16755039		C	G	0.667985	0.65348	0.834981	40424	-0.0573844	0.0200002	8.23229	8.21571	0.00415293	8.23419	-0.0474396	0.0190505	6.20112	6.1874	6.20211
rs10962447	16486758		C	A	0.0507483	0.0486107	0.454101	40424	-0.17245	0.0608779	8.02429	8.16701	0.00426592	8.03389	-0.139355	0.0576572	5.84172	5.93934	5.84662
rs113303650	16862247		A	G	0.00288303	0.00380972	0.291308	40424	0.779609	0.269336	8.37847	8.16422	0.00427248	8.55443	0.916381	0.252072	13.216	12.5223	13.6132
rs141705879	16935607		G	T	0.00826478	0.00903459	0.301581	40424	0.48609	0.167486	8.42317	8.12962	0.00435479	8.48698	0.349897	0.158271	4.88741	4.72551	4.90927
rs654521	17271858		A	G	0.384906	0.380901	0.868227	40424	-0.0548233	0.0192835	8.08273	8.09912	0.00442868	8.0845	-0.0448472	0.0183827	5.95182	5.96349	5.95269
rs12683587	16908663		A	G	0.0799985	0.0909556	0.956764	40424	0.0894569	0.0313865	8.12348	8.05314	0.00454249	8.12819	0.112191	0.0299522	14.0301	13.833	14.0442
rs10756788	16718436		A	G	0.634579	0.620321	0.792516	40424	-0.056803	0.0200351	8.03824	8.02622	0.0046105	8.04001	-0.0453639	0.0190762	5.65507	5.64592	5.65586
rs10756789	16720122		A	G	0.634582	0.620327	0.792558	40424	-0.0567971	0.0200342	8.03727	8.02526	0.00461294	8.03904	-0.0453436	0.0190753	5.65055	5.64141	5.65134
rs10756790	16720198		C	G	0.634582	0.620327	0.792558	40424	-0.0567966	0.0200342	8.03713	8.02512	0.0046133	8.0389	-0.0453423	0.0190753	5.65023	5.64108	5.65102
rs10481558	16715657		C	T	0.634371	0.620091	0.792513	40424	-0.0566458	0.0200424	7.98794	7.97604	0.00474005	7.98968	-0.0455464	0.0190845	5.69569	5.68643	5.69649
rs113791705	16909239		C	G	0.0797072	0.0905987	0.956096	40424	0.0892614	0.0314701	8.04507	7.9758	0.00474068	8.04969	0.112055	0.0300309	13.9228	13.7279	13.9367
c9_pos16955965	16965965		A	C	0.00421795	0.00739161	0.669915	28728	0.710501	0.260275	7.45186	7.93506	0.0048486	7.60507	0.274863	0.126872	4.69354	4.57571	4.71815
rs191388774	16875717		C	T	0.00555774	0.00475227	0.370104	40424	-0.564067	0.205994	7.49813	7.90072	0.00494151	7.57667	-0.603649	0.199953	9.11409	9.72197	9.21751
rs144418290	16857956		G	A	0.00667438	0.00576217	0.346613	40424	-0.540564	0.196976	7.53124	7.8959	0.0049547	7.58156	-0.493374	0.189141	6.8043	7.1661	6.84498
rs2779773	17278584		A	G	0.398525	0.395528	0.858864	40424	-0.0538937	0.019236	7.84963	7.86388	0.00504321	7.85128	-0.0422657	0.0183327	5.31524	5.32398	5.31592
rs10962813	17006147		T	G	0.140205	0.1281	0.965631	40424	-0.0732777	0.026242	7.79739	7.85829	0.00505882	7.80057	-0.0827057	0.0250787	10.8758	10.9973	10.8817
rs10756856	17242708		G	C	0.360258	0.357609	0.848786	40424	-0.0552949	0.0197711	7.82182	7.84011	0.00510995	7.82351	-0.0424646	0.01884	5.08033	5.09117	5.08098
rs75406404	16423585		C	T	0.00255257	0.00295092	0.119109	40424	1.32876	0.467311	8.08505	7.82415	0.00515527	8.22398	1.05561	0.439841	5.75993	5.58465	5.83027
rs146874525	16726276		A	C	0.00368619	0.00433736	0.35229	40424	0.645355	0.22611	8.14624	7.82307	0.00515835	8.24915	0.536823	0.211641	6.43372	6.13219	6.50021
rs10810658	16886600		G	A	0.729426	0.731937	0.891439	40424	0.0576613	0.0206646	7.786	7.81767	0.00517379	7.78797	0.0502766	0.0197852	6.45731	6.48566	6.45857
rs10283611	16858798		T	C	0.920581	0.925787	0.560223	40424	0.12298	0.0443403	7.6926	7.79491	0.00523936	7.69906	0.123451	0.0425646	8.41191	8.55333	8.41919
rs112939130	16624733		T	C	0.00885485	0.0109593	0.518323	40424	0.333007	0.11806	7.95614	7.74922	0.00537357	7.99458	0.393057	0.112515	12.2037	11.7197	12.2951
rs1759613	17279064		C	T	0.39835	0.39545	0.857686	40424	-0.0534224	0.019246	7.7049	7.71875	0.00546502	7.70649	-0.0418085	0.0183419	5.19569	5.20413	5.19634
rs1330303	16715826		T	C	0.639408	0.625747	0.783091	40424	-0.0563503	0.0202693	7.72882	7.71713	0.00546993	7.73047	-0.044642	0.0192928	5.35423	5.34554	5.35494
rs13290095	16973123		A	C	0.476327	0.489901	0.989419	40424	0.0486206	0.0175546	7.6711	7.67114	0.0056111	7.6726	0.048651	0.0167551	8.43117	8.43061	8.43282
rs7018705	17267371		C	G	0.377298	0.373842	0.843082	40424	-0.0542454	0.0196328	7.63415	7.64949	0.00567884	7.63573	-0.0441509	0.0187165	5.56452	5.57533	5.56528
rs1416746	16973344		G	A	0.476149	0.489674	0.990604	40424	0.0485017	0.0175467	7.64047	7.6405	0.00570721	7.64196	0.0485083	0.016748	8.38894	8.38838	8.39058
rs142180734	16820849		A	G	0.00168266	0.00122516	0.211115	40424	-1.55926	0.608212	6.57243	7.63233	0.00573312	6.82876	-1.74722	0.60115	8.44755	10.2539	8.78401
rs186482410	16939839		T	C	0.00168615	0.00129299	0.171021	40424	-1.72864	0.66803	6.69601	7.63164	0.00573531	6.86598	-1.70505	0.638454	7.13204	8.33807	7.30362
rs9406666	17272037		T	C	0.385482	0.381722	0.867085	40424	-0.05321	0.019285	7.61285	7.62768	0.00574792	7.61442	-0.043631	0.0183838	5.63272	5.64338	5.6335
rs55933102	16817720		G	T	0.0663077	0.0708743	0.53764	40424	0.130807	0.0470976	7.71375	7.62714	0.00574964	7.71998	0.0921549	0.0445784	4.27355	4.23036	4.27543
rs10962548	16714414		G	A	0.631859	0.61791	0.786797	40424	-0.0555071	0.0200926	7.63176	7.62084	0.00576976	7.63335	-0.0436511	0.0191329	5.2051	5.19711	5.20578
rs10962799	16989643		G	A	0.0165308	0.0129151	0.79833	40424	-0.227871	0.0840323	7.35335	7.59721	0.00584587	7.37764	-0.266274	0.0809133	10.8297	11.3601	10.8818
rs953586	16974716		T	G	0.475989	0.489384	0.999979	40424	0.048289	0.0175283	7.5896	7.58965	0.00587043	7.59107	0.0482508	0.0167311	8.31683	8.31632	8.31844
rs2779775	17274319		G	T	0.397349	0.394337	0.854952	40424	-0.0531094	0.0192976	7.57415	7.5877	0.00587679	7.57569	-0.0419899	0.0183917	5.2125	5.22105	5.21316
rs182662107	16861758		C	A	0.00259442	0.00201112	0.204508	40424	-1.20973	0.460457	6.90233	7.57343	0.0059235	6.99632	-1.32649	0.442147	9.00071	10.144	9.17667
rs34108610	16801401		A	AT	0.152385	0.158517	0.846258	40424	0.0723246	0.0262248	7.60587	7.5623	0.00596019	7.60849	0.0469389	0.0249241	3.54672	3.52943	3.54726
rs17743666	16814564		A	G	0.031011	0.0342885	0.521715	40424	0.186904	0.0674234	7.68446	7.53906	0.00603755	7.69805	0.171168	0.0634331	7.28141	7.12934	7.2945
rs201495955	17232486		TA	T	0.0704367	0.0666893	0.736651	40424	-0.111714	0.0409312	7.4492	7.53663	0.0060457	7.45401	-0.126041	0.0390578	10.4138	10.5854	10.423
c9_pos16902533	16912533		A	G	0.0813584	0.092336	0.978743	40424	0.0851663	0.030922	7.58581	7.52324	0.0060908	7.58986	0.108393	0.0295265	13.4765	13.2928	13.4893
rs11444289	17273175		G	GA	0.385571	0.381895	0.866743	40424	-0.0528068	0.0192872	7.49621	7.51069	0.00613339	7.49774	-0.0432246	0.0183861	5.5269	5.53726	5.52765
rs13296274	16729959		C	A	0.638796	0.624941	0.810133	40424	-0.0545865	0.0199144	7.51337	7.50192	0.00616333	7.51492	-0.0437058	0.0189571	5.31538	5.30657	5.31608
rs12236039	16972104		C	G	0.475894	0.489371	0.989047	40424	0.0480514	0.0175511	7.49552	7.49555	0.00618516	7.49696	0.0482503	0.0167517	8.29621	8.29567	8.29782
rs189845990	16873175		A	C	0.00272079	0.00330002	0.438647	40424	0.655363	0.234331	7.82178	7.48484	0.00622206	7.94316	0.462839	0.219708	4.43778	4.24366	4.47731
rs10810638	16810614		G	C	0.567092	0.55398	0.642529	40424	-0.0601411	0.022027	7.45475	7.44983	0.00634424	7.45631	-0.0617877	0.0208466	8.78484	8.77939	8.78668
rs7018876	16971888		A	G	0.475817	0.489265	0.989669	40424	0.0478873	0.0175495	7.44578	7.44579	0.0063585	7.4472	0.0481371	0.0167502	8.25885	8.25829	8.26044
rs7035388	16971884		T	C	0.475818	0.489266	0.98968	40424	0.0478868	0.0175495	7.44566	7.44566	0.00635896	7.44707	0.048138	0.0167502	8.25918	8.25863	8.26077
rs66503309	16797148		A	AT	0.752251	0.737798	0.985124	40424	-0.0553735	0.0202785	7.45642	7.43267	0.00640502	7.4582	-0.0449798	0.0193292	5.41513	5.39664	5.416
rs150678149	16940785		T	G	0.0016006	0.00197966	0.139872	40424	1.48439	0.531521	7.79932	7.41987	0.00645075	7.95373	1.31353	0.492416	7.11568	6.76478	7.28579
rs10962554	16729697		G	C	0.638949	0.625053	0.811784	40424	-0.0542097	0.0198941	7.42511	7.41386	0.00647233	7.42662	-0.0436297	0.0189375	5.30787	5.2991	5.30857
rs150306062	16998667		G	GGATT	0.139548	0.127537	0.979801	40424	-0.0707143	0.0260707	7.35716	7.41269	0.00647654	7.35999	-0.0810901	0.0249157	10.5923	10.7088	10.5979
rs4961515	16971556		A	G	0.475817	0.489237	0.991316	40424	0.0477181	0.0175449	7.39715	7.39715	0.00653273	7.39855	0.0479453	0.0167454	8.19788	8.19732	8.19945
rs10756796	16730974		A	G	0.63909	0.625214	0.811957	40424	-0.0540951	0.0198957	7.39258	7.38138	0.00659026	7.39408	-0.0435861	0.0189392	5.29632	5.28756	5.29701
rs9407783	17149541		G	A	0.429548	0.426984	0.868975	40424	-0.0512059	0.0188761	7.35893	7.36809	0.00663914	7.36035	-0.0407335	0.0179719	5.13705	5.14281	5.13767
rs10962605	16799623		A	G	0.751317	0.736883	0.982435	40424	-0.0551037	0.0202707	7.38965	7.36636	0.00664553	7.39139	-0.0445806	0.0193228	5.32292	5.30504	5.32376
rs4961514	16971270		A	G	0.475925	0.489371	0.997408	40424	0.0475392	0.0175427	7.34358	7.3436	0.00673019	7.34496	0.0479344	0.0167434	8.19609	8.19557	8.19765
rs10810636	16799109		A	G	0.752273	0.737857	0.979418	40424	-0.0551314	0.020325	7.35759	7.33436	0.00676488	7.35932	-0.0449131	0.0193757	5.37318	5.35497	5.37404
rs199802355	16775399		A	AAG	0.0306485	0.0327518	0.582347	40424	0.176534	0.0646813	7.44901	7.33005	0.00678112	7.46003	0.148325	0.0613922	5.83716	5.73604	5.84384
rs7046933	17254620		A	T	0.388551	0.385051	0.861844	40424	-0.0522054	0.0193017	7.3154	7.32908	0.00678478	7.31685	-0.0428127	0.0184041	5.4115	5.42135	5.41222
rs10962950	17255442		C	A	0.388484	0.384975	0.862256	40424	-0.0521565	0.0192977	7.30472	7.31836	0.00682537	7.30616	-0.0427218	0.0184003	5.39077	5.40055	5.39148
rs1952689	16723226		G	C	0.637069	0.623373	0.790361	40424	-0.0543062	0.020104	7.29681	7.28598	0.00694948	7.29827	-0.0428007	0.0191409	5.0001	4.99219	5.00072
rs10962610	16802955		C	T	0.020169	0.0220909	0.573483	40424	0.215312	0.078962	7.43529	7.28303	0.0069609	7.45145	0.216178	0.0747226	8.36989	8.15608	8.3912
rs10962600	16795783		C	T	0.752146	0.737953	0.996613	40424	-0.054563	0.020189	7.30409	7.28087	0.00696928	7.3058	-0.0439626	0.0192441	5.21879	5.20114	5.21961
rs13290922	17253518		C	T	0.400886	0.398262	0.854303	40424	-0.0518895	0.0192527	7.26402	7.27642	0.00698656	7.26543	-0.0406678	0.0183537	4.9097	4.91732	4.91028
rs10962599	16795286		C	T	0.749977	0.735877	0.985711	40424	-0.0546001	0.0202282	7.28572	7.26276	0.0070399	7.28742	-0.0433727	0.0192819	5.05981	5.04309	5.06058
rs1576962	17251386		G	A	0.376296	0.372873	0.860025	40424	-0.0524398	0.0194808	7.24614	7.26057	0.00704849	7.24757	-0.0426324	0.0185654	5.27314	5.28331	5.27382
rs10962597	16794348		A	C	0.752356	0.73822	0.984148	40424	-0.0547342	0.0202931	7.27482	7.25169	0.00708343	7.27652	-0.0439938	0.019342	5.17345	5.156	5.17425
rs145929901	17161893		C	CT	0.00990331	0.00842536	0.397068	40424	-0.406866	0.154613	6.92485	7.23713	0.0071411	6.96378	-0.481058	0.149545	10.3479	11.0287	10.4283
rs10962982	17268584		T	C	0.383304	0.379968	0.860197	40424	-0.0520753	0.019378	7.22185	7.23556	0.00714735	7.22327	-0.042029	0.0184753	5.17508	5.18447	5.17574
rs138990740	16661196		G	C	0.00134965	0.000936048	0.190043	40424	-1.77156	0.70741	6.2715	7.21992	0.00720989	6.48821	-2.06372	0.698175	8.73721	10.4718	9.03571
rs2779778	17300060		G	A	0.378383	0.374977	0.832799	40424	-0.0528896	0.0197395	7.17907	7.1929	0.00731926	7.18047	-0.0426175	0.0188156	5.13026	5.1397	5.13091
rs75938007	17390878		G	A	0.0222904	0.0181405	0.770609	40424	-0.193921	0.0732593	7.00685	7.19153	0.00732485	7.02207	-0.203583	0.0700963	8.43518	8.72782	8.45696
rs10962596	16792200		C	G	0.751781	0.737643	0.970835	40424	-0.0546857	0.0203843	7.19708	7.1742	0.00739594	7.19874	-0.0446206	0.0194262	5.27589	5.25789	5.27672
rs192184387	16890983		G	A	0.00542383	0.00442949	0.275608	40424	-0.672903	0.259581	6.71985	7.14395	0.00752173	6.76847	-0.783113	0.25014	9.80124	10.6466	9.90786
c9_pos16900025	16910025		T	C	0.0816331	0.0924691	0.979429	40424	0.0827549	0.030893	7.17572	7.1181	0.00763095	7.17933	0.106635	0.0294971	13.069	12.8936	13.0809
rs10810598	16733799		T	A	0.638413	0.62466	0.811995	40424	-0.0530861	0.0198893	7.124	7.11339	0.00765103	7.12539	-0.0429007	0.0189321	5.1349	5.12655	5.13555
rs200676089	17244215		TG	T	0.347803	0.345021	0.769629	40424	-0.0558153	0.020955	7.09466	7.1112	0.00766038	7.09607	-0.0459747	0.019971	5.29956	5.31184	5.30027
rs2990670	17295837		C	G	0.383259	0.379947	0.855233	40424	-0.0516507	0.0194038	7.08566	7.09899	0.00771274	7.08702	-0.0409475	0.0184979	4.90015	4.90881	4.90074
rs10756826	16889171		C	G	0.739916	0.742079	0.928785	40424	0.0543655	0.0204628	7.05855	7.08629	0.00776759	7.06017	0.0483645	0.0195863	6.09745	6.12387	6.09858
rs12377846	16786784		A	C	0.0353614	0.0376779	0.561605	40424	0.165382	0.0616866	7.18778	7.08438	0.00777587	7.19628	0.133136	0.058553	5.17002	5.09398	5.17443
rs113319499	16848867		C	G	0.00574218	0.00709398	0.476062	40424	0.415096	0.153592	7.30402	7.08211	0.00778573	7.35589	0.422445	0.145063	8.48059	8.1212	8.55167
rs118101547	16889238		G	T	0.00797333	0.00893005	0.229438	40424	0.519742	0.193078	7.24616	7.06908	0.00784255	7.28362	0.563598	0.183077	9.47704	9.12043	9.53979
rs10810604	16744807		T	C	0.64467	0.631196	0.807117	40424	-0.0533049	0.02005	7.06815	7.05693	0.00789592	7.06953	-0.0422781	0.0190865	4.90656	4.8982	4.90717
rs189316275	16664770		G	T	0.00306564	0.00237092	0.232914	40424	-0.98728	0.386341	6.53041	7.05594	0.00790028	6.59996	-1.09913	0.369981	8.82556	9.7244	8.96227
rs150566437	17244213		TTTG	T	0.34704	0.344213	0.771873	40424	-0.0555138	0.020933	7.03296	7.0493	0.00792962	7.03434	-0.0459187	0.0199506	5.29746	5.30975	5.29818
rs188342333	17225151		C	T	0.00100387	0.000762199	0.129413	40424	-2.31119	0.920921	6.29835	7.04685	0.00794048	6.44649	-2.30151	0.897686	6.57318	7.40392	6.66304
rs2026804	16800341		A	C	0.751044	0.73669	0.981912	40424	-0.0539037	0.020278	7.06621	7.04445	0.00795112	7.0678	-0.0440069	0.01933	5.18293	5.16578	5.18373
rs2253579	16797360		T	C	0.912521	0.907954	0.832473	40424	-0.0890772	0.0334423	7.0948	7.03579	0.00798966	7.09838	-0.0620537	0.0317727	3.8144	3.78577	3.8154
rs201406740	17244211		TTTTTG	T	0.336146	0.332849	0.776086	40424	-0.0557737	0.0210564	7.01601	7.03313	0.00800154	7.0174	-0.0472453	0.0200706	5.54109	5.55506	5.54189
rs7028582	17380986		C	A	0.919838	0.927337	0.98447	40424	0.0880063	0.0333875	6.94802	7.02413	0.00804185	6.95202	0.0987705	0.0318786	9.59968	9.74819	9.60728
rs670511	17293025		G	T	0.384851	0.381713	0.859717	40424	-0.0511367	0.0193407	6.99068	7.00357	0.00813473	6.992	-0.0408071	0.0184381	4.89823	4.90676	4.89882
rs6475079	16779009		A	G	0.922614	0.919234	0.790261	40424	-0.0967235	0.0363954	7.06272	6.99733	0.00816314	7.06675	-0.0678367	0.0344414	3.87944	3.84656	3.88065
rs4554574	17379849		A	G	0.920005	0.927454	0.996215	40424	0.0872071	0.0332223	6.89041	6.96534	0.00831036	6.89433	0.0974788	0.0317317	9.43697	9.58123	9.4443
rs148377579	17294425		T	TC	0.385328	0.382292	0.859763	40424	-0.0509498	0.019332	6.94598	6.95872	0.00834117	6.94728	-0.0405256	0.0184291	4.83559	4.84393	4.83616
rs17740450	16669394		A	C	0.0309606	0.0344291	0.47869	40424	0.184689	0.0695533	7.05089	6.94321	0.0084138	7.06004	0.215864	0.0660816	10.6708	10.4343	10.6928
rs144013719	16479006		T	C	0.0469897	0.050146	0.902627	40424	0.113433	0.042799	7.0244	6.9414	0.00842232	7.03026	0.0849505	0.0406181	4.37413	4.32304	4.3764
rs4961495	16778368		A	G	0.922523	0.919164	0.791406	40424	-0.0961167	0.0363556	6.98966	6.9253	0.00849847	6.99361	-0.0673565	0.0344037	3.8331	3.80082	3.83428
rs10962808	17002275		A	G	0.140781	0.129301	0.972132	40424	-0.0681109	0.0260068	6.85899	6.90837	0.00857932	6.86142	-0.0771152	0.0248532	9.62752	9.72718	9.6321
rs185550972	16850847		C	T	0.00561226	0.00642981	0.204796	40424	0.638056	0.23929	7.10999	6.90173	0.00861124	7.17624	0.781217	0.224895	12.0666	11.4888	12.2523
rs201552789	16968055		T	TA	0.475994	0.488878	0.981175	40424	0.0462376	0.0176114	6.89293	6.89283	0.00865422	6.89414	0.0458617	0.0168073	7.44568	7.44505	7.44697
rs4961759	16777457		A	G	0.920833	0.917422	0.793859	40424	-0.0948084	0.0359534	6.95366	6.8907	0.00866453	6.95749	-0.0674809	0.0340186	3.93486	3.90178	3.93608
rs78424415	17227255		T	C	0.0804653	0.0731952	0.974309	40424	-0.0872863	0.0334316	6.81674	6.89034	0.00866628	6.82057	-0.0962005	0.0319162	9.08517	9.22102	9.09195
rs619380	17302341		A	G	0.385847	0.382837	0.859643	40424	-0.0506961	0.0193314	6.87736	6.88986	0.00866861	6.87864	-0.0403238	0.0184285	4.78787	4.79606	4.78843
rs4961511	16970809		G	T	0.474797	0.487784	0.986843	40424	0.0461056	0.0175767	6.88065	6.88053	0.00871397	6.88186	0.0462182	0.0167754	7.5907	7.59005	7.59204
rs595894	17283197		G	A	0.398383	0.396081	0.852756	40424	-0.0505288	0.0192831	6.86632	6.87784	0.0087271	6.86758	-0.0389017	0.018377	4.48116	4.48786	4.48165
rs35272268	16807007		C	CT	0.747651	0.733233	0.918242	40424	-0.0545237	0.0207606	6.89748	6.87684	0.00873198	6.89899	-0.0462377	0.0197971	5.45491	5.43668	5.45579
rs605916	17291057		A	G	0.384917	0.381808	0.860524	40424	-0.0506349	0.0193296	6.86205	6.87459	0.00874298	6.86332	-0.0406019	0.0184266	4.85513	4.86356	4.85571
rs74546970	16900644		G	A	0.0421556	0.0503244	0.731664	40424	0.124532	0.0472953	6.93307	6.85887	0.00882023	6.93918	0.179617	0.0452529	15.7544	15.4409	15.7857
rs632265	17301710		C	A	0.384643	0.381538	0.860029	40424	-0.0505525	0.0193389	6.83313	6.84562	0.00888589	6.83439	-0.0405291	0.0184354	4.83313	4.84153	4.8337
rs9406673	17289821		G	C	0.22584	0.222484	0.711348	40424	-0.0648704	0.0248519	6.81357	6.84326	0.00889763	6.81521	-0.0459949	0.0237003	3.76627	3.78044	3.76673
0	17230413		C	CT	0.0803965	0.0731619	0.975265	40424	-0.0869331	0.0334256	6.76413	6.83691	0.00892932	6.7679	-0.0955829	0.0319096	8.9726	9.10599	8.97922
rs1759454	17302919		T	A	0.384753	0.38166	0.860109	40424	-0.0505082	0.0193367	6.82272	6.83517	0.00893802	6.82399	-0.0404933	0.0184334	4.82566	4.83403	4.82623
rs10963067	17367946		C	A	0.0801559	0.07278	0.975716	40424	-0.0870111	0.033472	6.7575	6.8304	0.00896192	6.76128	-0.0975806	0.0319577	9.32341	9.4654	9.33056
rs10810750	17312932		A	G	0.614988	0.618064	0.861057	40424	0.0503836	0.0193213	6.79994	6.81234	0.00905301	6.8012	0.0404461	0.0184181	4.82238	4.83075	4.82295
rs10962774	16968831		G	T	0.475343	0.488216	0.985452	40424	0.0458966	0.0175847	6.81228	6.81211	0.00905417	6.81346	0.045741	0.0167812	7.42959	7.42889	7.43088
rs1554747	16970402		T	A	0.474895	0.487832	0.985988	40424	0.045877	0.0175819	6.8086	6.80846	0.0090727	6.80978	0.0460316	0.0167801	7.52531	7.52465	7.52663
rs10756860	17309336		T	C	0.601225	0.60338	0.851421	40424	0.0502795	0.0192897	6.7941	6.80532	0.00908867	6.79533	0.0384484	0.018384	4.37398	4.38037	4.37445
rs10810631	16788367		T	C	0.211394	0.223521	0.753753	40424	0.0638226	0.0244259	6.82731	6.80191	0.00910604	6.82896	0.0553068	0.0232747	5.64661	5.62306	5.64766
rs4409489	17295260		A	C	0.399222	0.39711	0.85164	40424	-0.0502072	0.0192822	6.77983	6.79098	0.00916196	6.78106	-0.0382759	0.0183767	4.33828	4.34456	4.33873
rs670058	17292890		A	G	0.399178	0.397064	0.851684	40424	-0.0502052	0.019282	6.77947	6.79063	0.00916376	6.7807	-0.0382773	0.0183764	4.33873	4.34502	4.33919
rs193136294	16788522		C	G	0.00292433	0.0024305	0.169401	40424	-1.15211	0.4583	6.31955	6.78957	0.0091692	6.33915	-1.02664	0.433372	5.61197	6.09076	5.65176
rs870271	17280827		C	G	0.398904	0.396733	0.853071	40424	-0.0501639	0.0192727	6.77484	6.78606	0.00918725	6.77607	-0.0384281	0.0183668	4.37752	4.38394	4.37799
rs185301227	17213523		A	G	0.021755	0.0175339	0.801673	40424	-0.187399	0.0729103	6.60623	6.77843	0.0092266	6.62005	-0.203541	0.0696731	8.53438	8.83592	8.55714
rs593614	17282681		C	G	0.399011	0.396857	0.853021	40424	-0.0501248	0.0192715	6.76509	6.77627	0.00923777	6.76632	-0.0383914	0.0183656	4.36976	4.37615	4.37022
rs16935416	17235156		G	A	0.0800185	0.0727241	0.994605	40424	-0.0860846	0.0332486	6.70353	6.77516	0.00924352	6.70722	-0.0951007	0.0317475	8.97321	9.10646	8.97981
rs670509	17293024		G	A	0.0796563	0.0723177	0.978376	40424	-0.0864761	0.0334253	6.69333	6.76492	0.00929671	6.69702	-0.095843	0.0319044	9.02441	9.15896	9.0311
rs10962957	17261972		A	T	0.0798918	0.0725321	0.982754	40424	-0.0864645	0.0334326	6.68861	6.76048	0.00931987	6.69232	-0.0968496	0.0319088	9.2124	9.35183	9.21942
rs2779776	17300093		G	A	0.386305	0.383277	0.855609	40424	-0.0503005	0.0193768	6.73873	6.75089	0.00937009	6.73996	-0.0403201	0.0184711	4.76494	4.77312	4.7655
rs10962559	16743408		A	T	0.644094	0.630783	0.806464	40424	-0.0521296	0.0200498	6.76001	6.74952	0.00937729	6.76128	-0.0415288	0.0190857	4.73456	4.72665	4.73512
rs140849520	16884573		C	T	0.0143704	0.0165238	0.558515	40424	0.241492	0.0919421	6.89887	6.74949	0.00937745	6.92128	0.309815	0.087199	12.6236	12.1623	12.6975
rs1330301	16767819		G	C	0.920671	0.917228	0.803234	40424	-0.0931663	0.0357222	6.80206	6.7411	0.00942165	6.80572	-0.0673147	0.0337958	3.9673	3.93385	3.96853
rs7864650	17313678		T	A	0.600109	0.602172	0.849556	40424	0.0500662	0.019304	6.72656	6.73763	0.00944	6.72778	0.0380371	0.0183949	4.27581	4.28198	4.27625
rs2780206	17300064		C	T	0.386186	0.383161	0.855387	40424	-0.0502486	0.0193834	6.72025	6.73237	0.00946787	6.72148	-0.0402994	0.0184773	4.75687	4.76503	4.75743
rs7037653	16771594		T	C	0.920643	0.917201	0.802772	40424	-0.0930655	0.0357258	6.786	6.72531	0.00950542	6.78964	-0.0672075	0.0338003	3.95362	3.92038	3.95485
rs10962663	16891002		A	G	0.040423	0.0482265	0.749926	40424	0.124349	0.0477417	6.78401	6.7095	0.00959006	6.79019	0.180279	0.0456645	15.586	15.2653	15.6182
rs4433240	16801130		G	C	0.751231	0.737048	0.967021	40424	-0.0528792	0.0204111	6.71176	6.69158	0.00968693	6.71319	-0.0431496	0.0194598	4.91672	4.90086	4.91744
rs140957588	17344148		GTTTAT	G	0.610319	0.613075	0.853178	40424	0.0500831	0.0193837	6.67588	6.68755	0.00970885	6.67708	0.0402692	0.0184795	4.74857	4.75649	4.74912
rs12345910	16802118		T	C	0.751724	0.737605	0.963264	40424	-0.0529605	0.0204608	6.69978	6.67962	0.00975214	6.70121	-0.0431142	0.0195078	4.88456	4.86882	4.88527
rs72004590	17273435		ATGTATTAC	A	0.0796537	0.0722998	0.986605	40424	-0.08581	0.0334065	6.59803	6.66842	0.00981362	6.60164	-0.0961244	0.0318834	9.08948	9.22609	9.09632
rs202037155	17254740		G	GTTT	0.374941	0.371337	0.830653	40424	-0.0510219	0.019785	6.65032	6.66267	0.00984533	6.65153	-0.0422328	0.0188705	5.00876	5.01793	5.00938
rs10756800	16739894		C	T	0.602766	0.590206	0.713566	40424	-0.0539719	0.0209102	6.66219	6.65397	0.00989351	6.6634	-0.0427731	0.0199118	4.61445	4.60825	4.61497
rs10756799	16739893		G	T	0.602766	0.590206	0.713566	40424	-0.0539718	0.0209102	6.66217	6.65395	0.00989363	6.66338	-0.042773	0.0199118	4.61443	4.60822	4.61495
rs79512743	17239045		C	T	0.0800041	0.0727251	0.98375	40424	-0.085545	0.0333497	6.5797	6.64955	0.00991809	6.58328	-0.0954205	0.0318342	8.98454	9.11832	8.99118
rs112172012	17156249		A	G	0.0217497	0.0175449	0.805953	40424	-0.185034	0.0726953	6.47871	6.64559	0.00994016	6.49197	-0.2007	0.0694479	8.35175	8.64301	8.37352
rs191450668	17188165		A	G	0.000887582	0.000543247	0.366258	40424	-1.50901	0.643088	5.50607	6.638	0.00998259	5.8372	-1.56547	0.644389	5.90189	7.26577	6.19585
rs10962612	16804167		T	G	0.750121	0.73574	0.947456	40424	-0.0529981	0.0205436	6.65533	6.63566	0.00999572	6.65674	-0.0448751	0.0195887	5.2481	5.23081	5.24891
rs10738475	17364927		C	A	0.919446	0.926781	0.981553	40424	0.0851083	0.0332248	6.56174	6.63118	0.0100209	6.56529	0.0955343	0.0317214	9.07013	9.20575	9.07689
rs190976897	17149158		T	C	0.00104728	0.000704569	0.458705	40424	-1.14471	0.478818	5.7155	6.62811	0.0100382	5.97337	-0.772178	0.471747	2.67927	3.00604	2.73374
rs138950900	17188869		T	C	0.001042	0.000701759	0.455912	40424	-1.15031	0.481528	5.70669	6.62063	0.0100804	5.96543	-0.774817	0.474384	2.66771	2.99329	2.72199
rs183382600	16886012		G	A	0.0111859	0.0129982	0.492447	40424	0.286997	0.110314	6.76848	6.61279	0.0101249	6.79292	0.375193	0.104556	12.8768	12.3685	12.9655
rs55863214	17363422		G	C	0.0797146	0.0723388	0.977574	40424	-0.0856854	0.0334997	6.5423	6.612	0.0101294	6.54587	-0.096448	0.0319804	9.09534	9.23274	9.1022
rs13284478	16736163		C	T	0.643303	0.630126	0.807228	40424	-0.0514787	0.0200318	6.60411	6.59402	0.0102322	6.60532	-0.0407752	0.0190687	4.57246	4.56499	4.57299
rs34259118	16737280		G	A	0.643302	0.630126	0.807239	40424	-0.0514765	0.0200317	6.6036	6.59351	0.0102351	6.6048	-0.0407734	0.0190686	4.57209	4.56462	4.57261
rs35007358	16737384		G	C	0.643302	0.630126	0.80724	40424	-0.0514751	0.0200317	6.60323	6.59314	0.0102372	6.60444	-0.0407721	0.0190687	4.57179	4.56433	4.57232
rs10756801	16740110		G	T	0.643299	0.630123	0.807268	40424	-0.0514714	0.0200315	6.60247	6.59238	0.0102416	6.60367	-0.0407709	0.0190684	4.57162	4.56416	4.57215
rs10756798	16739763		C	T	0.6433	0.630125	0.807262	40424	-0.051469	0.0200316	6.60179	6.59171	0.0102455	6.603	-0.0407643	0.0190685	4.57013	4.56266	4.57065
rs76253082	17154161		G	A	0.00488561	0.00527097	0.223264	40424	0.672403	0.256834	6.85413	6.57393	0.0103483	6.91929	0.309388	0.242	1.63447	1.59119	1.63872
rs12238680	17251071		G	A	0.0799125	0.0726227	0.984689	40424	-0.085044	0.0333487	6.50323	6.57192	0.01036	6.50673	-0.0953653	0.0318302	8.97641	9.11014	8.98305
rs10810601	16736867		C	A	0.64381	0.630716	0.807132	40424	-0.0514041	0.0200424	6.57804	6.56795	0.0103831	6.57924	-0.0406355	0.0190792	4.53618	4.52876	4.5367
rs62541515	16736136		G	A	0.643811	0.630717	0.807125	40424	-0.0514017	0.0200425	6.57737	6.56728	0.0103871	6.57856	-0.0406337	0.0190793	4.53575	4.52833	4.53626
rs6475140	17350246		T	C	0.919624	0.926956	0.982552	40424	0.0846736	0.0332267	6.49413	6.56251	0.0104149	6.4976	0.0952523	0.0317214	9.01669	9.15116	9.02337
rs10962988	17269437		G	T	0.430296	0.428404	0.872856	40424	-0.0482549	0.0188589	6.5471	6.55481	0.0104601	6.54822	-0.03648	0.0179623	4.12464	4.12876	4.12504
rs645117	17293779		G	A	0.399615	0.397649	0.850057	40424	-0.0493388	0.0192931	6.53995	6.55046	0.0104857	6.54109	-0.0376	0.0183877	4.18139	4.18731	4.18182
rs200884747	16910990		A	AG	0.00198285	0.00156904	0.290015	40424	-1.05102	0.432559	5.90384	6.54308	0.0105293	6.02935	-1.03238	0.417175	6.12417	6.88271	6.24741
rs1582030	17261546		A	G	0.416599	0.41383	0.881697	40424	-0.0482116	0.0188609	6.53394	6.54263	0.010532	6.53507	-0.0381159	0.0179702	4.49891	4.5044	4.49939
rs7046154	16664759		A	G	0.645124	0.627846	0.80695	40424	-0.0514519	0.0201081	6.54731	6.53762	0.0105617	6.54849	-0.0529411	0.0191798	7.619	7.60408	7.62045
rs186858836	16904975		C	T	0.0010754	0.00122776	0.104432	40424	2.04445	0.786254	6.76124	6.53221	0.0105938	6.93592	1.45119	0.722835	4.03063	3.8346	4.08719
rs1591138	17261209		G	A	0.41637	0.413592	0.881615	40424	-0.0481591	0.0188646	6.51719	6.52586	0.0106317	6.51831	-0.0382021	0.0179735	4.51759	4.52314	4.51808
rs76834189	16658025		A	G	0.00573121	0.00570882	0.106864	40424	-0.928908	0.372644	6.21378	6.52063	0.010663	6.27188	-0.492297	0.344834	2.03814	2.09551	2.04409
rs79802950	16658028		G	A	0.00573123	0.00570881	0.106861	40424	-0.928893	0.372647	6.2135	6.52033	0.0106648	6.2716	-0.492326	0.344839	2.03833	2.09571	2.04428
rs192299902	16730008		C	G	0.00247436	0.00279987	0.130105	40424	1.17142	0.454857	6.63246	6.51702	0.0106847	6.8835	0.965373	0.423062	5.20693	4.98538	5.32867
rs12377046	16990075		A	G	0.0175208	0.0139116	0.856598	40424	-0.196706	0.0782238	6.32353	6.50839	0.0107367	6.34049	-0.2285	0.0753068	9.20673	9.60346	9.24244
rs73421454	16658111		G	A	0.00573098	0.00570927	0.106778	40424	-0.928032	0.372722	6.19948	6.50497	0.0107573	6.25739	-0.491545	0.344934	2.03075	2.08773	2.03666
rs1582031	17261350		T	G	0.416733	0.414011	0.881763	40424	-0.0480642	0.0188585	6.49575	6.50434	0.0107612	6.49686	-0.0379714	0.0179677	4.46609	4.47151	4.46656
rs10756857	17263325		T	A	0.412223	0.410807	0.83176	40424	-0.0494671	0.0194152	6.49156	6.50025	0.0107859	6.49267	-0.0359488	0.0184998	3.77601	3.78015	3.77635
rs77105654	16824030		A	C	0.0679427	0.0715122	0.536871	40424	0.120018	0.0468493	6.56279	6.49373	0.0108256	6.5672	0.0789981	0.0442781	3.18314	3.15515	3.18418
rs77956216	16878681		G	C	0.0415972	0.0498661	0.759126	40424	0.119549	0.0467222	6.54699	6.47837	0.0109195	6.55246	0.178342	0.0447004	15.9178	15.5962	15.9499
rs620280	17302171		A	G	0.0798861	0.0726319	0.980252	40424	-0.0843685	0.0333217	6.41071	6.47769	0.0109237	6.41409	-0.0941109	0.0318038	8.75631	8.8847	8.7626
rs10962571	16759788		C	T	0.0191611	0.020687	0.60254	40424	0.203996	0.0793648	6.60676	6.47667	0.01093	6.62101	0.186347	0.0751033	6.15641	6.0141	6.16874
rs111373803	16657727		CT	C	0.00573237	0.00571207	0.107173	40424	-0.923474	0.372058	6.16066	6.46378	0.0110095	6.21758	-0.48714	0.344208	2.00293	2.05888	2.00868
rs79641699	17360296		G	A	0.0791241	0.0718207	0.98348	40424	-0.0845698	0.0335114	6.36862	6.43557	0.0111857	6.372	-0.0950934	0.031992	8.83525	8.96681	8.84174
rs10756855	17231465		C	T	0.426433	0.424857	0.857611	40424	-0.0482105	0.0190237	6.42232	6.42985	0.0112218	6.4234	-0.0353437	0.0181162	3.80619	3.80986	3.80653
rs12164282	17312180		G	T	0.079028	0.0717056	0.980128	40424	-0.084718	0.0335916	6.36049	6.42724	0.0112383	6.36385	-0.095201	0.0320612	8.81706	8.94802	8.82351
rs114376194	16978597		A	T	0.0037106	0.004625	0.659427	40424	0.422485	0.163645	6.66526	6.42309	0.0112646	6.72793	0.358088	0.153853	5.41713	5.18262	5.45925
rs143857275	16983977		T	C	0.00354951	0.00306732	0.257302	40424	-0.772759	0.316946	5.94453	6.41391	0.011323	6.04083	-0.589998	0.311085	3.59702	3.83833	3.62321
rs185861419	17222842		G	C	0.00103345	0.000700406	0.451693	40424	-1.1395	0.484755	5.52568	6.3977	0.0114268	5.77088	-0.768924	0.477251	2.59581	2.90845	2.64755
rs60282857	16877141		G	C	0.0419132	0.0499868	0.762891	40424	0.118117	0.0464721	6.4601	6.39272	0.0114589	6.4654	0.171011	0.0444708	14.7875	14.4986	14.8151
rs374785	16998247		T	C	0.858751	0.869653	0.992699	40424	0.0647038	0.0256966	6.34029	6.38358	0.0115181	6.34236	0.0740351	0.0245652	9.08314	9.17319	9.08719
rs41349645	16882186		C	T	0.753039	0.754584	0.995724	40424	0.050914	0.0201916	6.35819	6.38254	0.0115248	6.35952	0.0446316	0.0193257	5.3335	5.35571	5.33438
rs144570904	17158856		A	T	0.0120718	0.013374	0.299339	40424	0.356573	0.139704	6.51449	6.3794	0.0115452	6.53305	0.386044	0.13179	8.58037	8.33265	8.61206
rs10756876	17364832		G	T	0.612547	0.615042	0.857305	40424	0.0488442	0.0193618	6.36403	6.375	0.0115739	6.36513	0.0390101	0.0184576	4.46687	4.47417	4.46736
rs10962560	16744121		C	G	0.609046	0.596589	0.725167	40424	-0.0525498	0.0208051	6.37971	6.37171	0.0115954	6.38082	-0.0410523	0.0198154	4.29208	4.28628	4.29253
rs7864270	17359662		G	A	0.612255	0.6147	0.857379	40424	0.0487613	0.019357	6.34561	6.3565	0.0116952	6.3467	0.0387969	0.018453	4.42038	4.42753	4.42085
rs79538054	16806390		A	C	0.00927951	0.0113814	0.643286	40424	0.266718	0.104592	6.5029	6.35377	0.0117132	6.52675	0.31402	0.0992832	10.0037	9.6408	10.0599
rs7021570	16678067		A	T	0.415744	0.423992	0.415913	40424	0.0690348	0.0274029	6.34662	6.34237	0.0117887	6.34777	0.0716689	0.0261031	7.53837	7.53193	7.53978
rs150566474	17201561		G	T	0.0061983	0.00703203	0.273065	40424	0.512096	0.20029	6.5371	6.33902	0.011811	6.58049	0.490486	0.18848	6.77207	6.51493	6.81813
rs10598074	17355890		GTC	G	0.611194	0.613435	0.854316	40424	0.0487317	0.0193949	6.31316	6.32392	0.011912	6.31424	0.0379913	0.0184857	4.22373	4.23037	4.22417
rs10963063	17355341		T	C	0.598843	0.600428	0.849435	40424	0.0485454	0.0193195	6.31399	6.32386	0.0119124	6.31506	0.0368413	0.0184109	4.00422	4.0097	4.00461
rs4961437	17368458		C	T	0.613104	0.61564	0.858157	40424	0.048631	0.0193572	6.31162	6.32249	0.0119216	6.31269	0.0390121	0.018453	4.46953	4.47686	4.47002
rs17813471	16680901		T	C	0.0226333	0.0201206	0.582664	40424	-0.205574	0.0829732	6.13847	6.30742	0.0120234	6.15001	-0.229733	0.078377	8.59154	8.91113	8.61808
rs10962583	16773966		T	G	0.0208971	0.0226537	0.610225	40424	0.191092	0.0753821	6.42614	6.3057	0.012035	6.43871	0.189349	0.0714437	7.02422	6.85737	7.03925
rs7873708	17349531		A	T	0.612776	0.615275	0.857711	40424	0.0485285	0.0193598	6.28335	6.29412	0.0121139	6.28442	0.0387434	0.0184555	4.40703	4.41419	4.40751
rs188582128	16816191		C	G	0.0033427	0.00395947	0.450233	40424	0.539683	0.211216	6.52866	6.28843	0.0121529	6.5914	0.445674	0.197869	5.07316	4.8579	5.11232
rs263571	17030663		G	A	0.166058	0.156096	0.97454	40424	-0.0598384	0.0239481	6.24334	6.28043	0.0122078	6.24512	-0.0680679	0.0229062	8.8304	8.90568	8.83377
rs7022060	17361597		A	G	0.598063	0.599597	0.848014	40424	0.0483897	0.0193249	6.27006	6.27977	0.0122124	6.27111	0.0367737	0.0184165	3.98715	3.99258	3.98754
rs6475139	17346914		C	T	0.612804	0.615279	0.857866	40424	0.0484534	0.0193601	6.26375	6.27447	0.012249	6.26482	0.0386799	0.0184556	4.39251	4.39964	4.39299
rs10756869	17342517		A	G	0.598529	0.600121	0.849788	40424	0.0482697	0.0193034	6.25291	6.26256	0.0123316	6.25396	0.0367675	0.0183952	3.99503	4.00046	3.99542
rs7864919	17347258		A	G	0.613015	0.615488	0.857134	40424	0.0484061	0.0193689	6.2458	6.25648	0.012374	6.24686	0.0386007	0.0184646	4.37032	4.37739	4.37079
rs10115784	17345994		T	C	0.920108	0.927318	0.986858	40424	0.0826492	0.0332206	6.18958	6.25315	0.0123973	6.19273	0.0930195	0.0317143	8.60279	8.72801	8.60887
rs7031361	17324645		T	A	0.919256	0.926364	0.976334	40424	0.0824543	0.0331494	6.18692	6.25024	0.0124176	6.19007	0.0921001	0.0316465	8.46972	8.59162	8.4756
rs61554943	16772534		T	C	0.919279	0.915867	0.801908	40424	-0.0891345	0.0355057	6.30225	6.24837	0.0124308	6.30534	-0.0645731	0.0336012	3.69311	3.66341	3.69417
rs9298773	17321382		T	C	0.61506	0.617681	0.857231	40424	0.048348	0.0193733	6.228	6.23884	0.0124978	6.22905	0.0386256	0.018466	4.37528	4.3825	4.37575
rs263636	17022423		G	A	0.174828	0.164446	1	40424	-0.0579461	0.0232669	6.20255	6.23704	0.0125105	6.20421	-0.0636605	0.0222476	8.18794	8.25099	8.19069
rs12551173	16916454		A	C	0.117971	0.114798	0.947931	40424	-0.0691452	0.0277983	6.1871	6.23204	0.0125459	6.18936	-0.0707463	0.0266995	7.02103	7.08772	7.02377
rs12342180	17327947		G	A	0.613972	0.616458	0.856967	40424	0.0482857	0.0193674	6.21576	6.22648	0.0125854	6.2168	0.0385875	0.0184607	4.36914	4.3763	4.36961
rs10810754	17320544		A	G	0.615164	0.617782	0.85703	40424	0.048298	0.0193766	6.21301	6.22382	0.0126043	6.21406	0.0385875	0.0184692	4.36513	4.37234	4.3656
rs1330300	16762537		G	A	0.919842	0.916519	0.807622	40424	-0.0889181	0.0354918	6.27658	6.22268	0.0126124	6.27967	-0.0646695	0.0335809	3.70863	3.67851	3.7097
rs12236166	17317738		T	C	0.0791674	0.0719259	0.980641	40424	-0.0831235	0.0334942	6.15897	6.22251	0.0126136	6.16213	-0.0936608	0.031969	8.58337	8.70908	8.58948
rs16934745	16490828		A	T	0.0366077	0.0342028	0.465487	40424	-0.175915	0.0712247	6.10018	6.21941	0.0126357	6.10784	-0.159132	0.0676946	5.52591	5.64144	5.53222
rs10962978	17268375		G	A	0.0775272	0.0706152	0.964594	40424	-0.0847039	0.034153	6.15105	6.21474	0.0126691	6.15422	-0.0941937	0.0326057	8.3456	8.46639	8.35144
rs150929911	17268048		C	T	0.0775494	0.070641	0.964344	40424	-0.0846528	0.0341519	6.14403	6.20761	0.0127202	6.1472	-0.0941615	0.0326049	8.34028	8.46095	8.34611
rs7865766	17347872		C	T	0.598555	0.600032	0.849566	40424	0.0480761	0.0193124	6.19704	6.20658	0.0127276	6.19807	0.0363253	0.0184043	3.89563	3.90086	3.896
rs192154035	16815960		T	G	0.00083586	0.00101535	0.153455	40424	1.77833	0.684605	6.74757	6.20469	0.0127412	7.04599	1.49743	0.650948	5.29173	5.04352	5.55476
rs7038064	17338316		T	C	0.614079	0.616562	0.857109	40424	0.0481308	0.0193697	6.17447	6.18509	0.0128831	6.1755	0.0385662	0.0184633	4.36309	4.37025	4.36356
rs10738457	16746159		G	A	0.0635878	0.0670756	0.730068	40424	0.102969	0.0412071	6.24403	6.1816	0.0129085	6.24789	0.0715711	0.0390965	3.3512	3.32138	3.35228
rs75560932	16824445		A	G	0.0632677	0.0666864	0.544332	40424	0.119586	0.0479916	6.20918	6.14337	0.0131906	6.21341	0.0835364	0.0453761	3.38919	3.35716	3.39044
rs35848071	16818886		CT	C	0.775757	0.7668	0.525498	40424	-0.0715196	0.0287964	6.16841	6.14317	0.0131921	6.17003	-0.0957719	0.0272508	12.3514	12.2731	12.3569
rs201701386	16424657		GGA	G	0.00715709	0.00596448	0.263763	40424	-0.555294	0.229697	5.84431	6.13848	0.0132271	5.87612	-0.659985	0.219208	9.06472	9.72675	9.14305
rs143085231	16668933		T	C	0.000943054	0.000788672	0.168275	40424	-1.85663	0.802872	5.34761	6.13368	0.0132631	5.55567	-1.36103	0.790773	2.96232	3.313	3.01907
rs147250352	17325168		ATTCTTT	A	0.600837	0.602438	0.849002	40424	0.047782	0.0193264	6.1126	6.12213	0.01335	6.1136	0.0362281	0.0184158	3.86998	3.87528	3.87034
rs185685397	16723215		A	C	0.000551728	0.000687635	0.11585	40424	2.55387	1.0076	6.4242	6.11097	0.0134345	6.62907	2.2684	0.92041	6.07401	5.74021	6.2819
rs66825305	17327310		CG	C	0.918276	0.925367	0.96939	40424	0.0813177	0.0330622	6.0493	6.11018	0.0134405	6.05229	0.0912974	0.0315678	8.36429	8.48334	8.36998
rs2039413	17225553		A	T	0.117864	0.111948	0.907535	40424	-0.0712414	0.0289389	6.06041	6.10598	0.0134725	6.06252	-0.0811836	0.0276273	8.63497	8.72746	8.63914
rs7865762	16805332		G	T	0.246587	0.260108	0.929003	40424	0.051489	0.0208104	6.12163	6.10374	0.0134896	6.12284	0.0424196	0.0198523	4.56575	4.55125	4.56638
rs4563978	17327295		C	T	0.599862	0.601333	0.849118	40424	0.0476838	0.0193191	6.09209	6.10151	0.0135066	6.09308	0.0362011	0.0184095	3.86689	3.87214	3.86725
rs7037111	17359939		C	T	0.598043	0.599366	0.850129	40424	0.0476024	0.0192974	6.08502	6.09424	0.0135623	6.08601	0.0357163	0.0183901	3.77194	3.77689	3.77229
rs10738474	17336492		G	A	0.614052	0.616461	0.85727	40424	0.0477701	0.0193683	6.08318	6.09355	0.0135676	6.08419	0.0381771	0.0184615	4.27632	4.28324	4.27677
rs10810599	16733870		G	T	0.064302	0.0677816	0.727577	40424	0.101917	0.0410956	6.15044	6.0894	0.0135995	6.15416	0.0705193	0.0389759	3.27359	3.24487	3.27462
rs12337171	17318647		C	T	0.601255	0.602868	0.849898	40424	0.0476245	0.0193156	6.07914	6.08862	0.0136055	6.08013	0.0363002	0.0184064	3.88939	3.89475	3.88975
rs10124487	17350843		C	T	0.597988	0.59929	0.849734	40424	0.0475476	0.0193028	6.06762	6.0768	0.0136969	6.0686	0.0355142	0.0183949	3.72741	3.73227	3.72775
rs6475137	17338162		T	A	0.612666	0.61499	0.853309	40424	0.0477788	0.0193992	6.066	6.07628	0.0137009	6.067	0.0377905	0.0184897	4.17739	4.18403	4.17782
rs2282072	16727446		T	A	0.0640345	0.0674832	0.731363	40424	0.101697	0.0410686	6.13196	6.07106	0.0137414	6.13567	0.0699612	0.0389531	3.22574	3.19758	3.22674
rs4272484	17319339		T	C	0.601474	0.603105	0.849943	40424	0.0475463	0.0193187	6.05727	6.06672	0.0137753	6.05826	0.03632	0.0184094	3.89234	3.89772	3.89271
rs12375569	16805155		A	G	0.753834	0.740395	0.931352	40424	-0.0511946	0.0208016	6.05694	6.03933	0.0139906	6.05811	-0.0418846	0.0198425	4.45569	4.44172	4.45628
rs7033974	17249636		T	C	0.380284	0.377666	0.860002	40424	-0.0476302	0.0194097	6.02183	6.03242	0.0140455	6.02282	-0.0379959	0.0184999	4.21827	4.22532	4.21871
0	17249351		TG	T	0.380283	0.377666	0.859972	40424	-0.0476306	0.0194099	6.02176	6.03235	0.014046	6.02275	-0.0379916	0.0185002	4.21719	4.22424	4.21763
rs12236820	17249540		T	G	0.38016	0.377548	0.859593	40424	-0.0476002	0.0194168	6.00986	6.02041	0.0141414	6.01084	-0.037978	0.0185067	4.21122	4.21825	4.21166
rs10962918	17232207		T	A	0.116698	0.110738	0.917205	40424	-0.0706429	0.0289143	5.96914	6.01382	0.0141943	5.97119	-0.0807775	0.0276065	8.56166	8.6533	8.56577
rs10810602	16739423		G	A	0.0634886	0.0669568	0.731893	40424	0.101487	0.0411965	6.0688	6.00884	0.0142344	6.07246	0.0707026	0.039085	3.27229	3.24347	3.27332
rs5016914	16751872		C	T	0.0642666	0.0676973	0.727082	40424	0.101284	0.0411165	6.06801	6.00841	0.0142379	6.07162	0.070574	0.0390095	3.27302	3.24438	3.27405
rs76590722	17053235		T	C	0.129952	0.119214	0.945993	40424	-0.0665265	0.0272666	5.95289	5.99609	0.0143376	5.95492	-0.0820335	0.0260619	9.90763	10.0206	9.91297
rs10962667	16892408		A	G	0.0386073	0.0359044	0.9528	40424	-0.11489	0.047337	5.89062	5.98084	0.0144621	5.89645	-0.121396	0.0454716	7.12736	7.27011	7.13558
rs144851949	16940637		C	T	0.018507	0.0205919	0.688458	40424	0.184538	0.0748204	6.08322	5.97929	0.0144748	6.09331	0.215727	0.0710915	9.20821	8.97049	9.23137
0	16914556		T	TTTTC	0.084241	0.0808923	0.926653	40424	-0.0800574	0.0329	5.92123	5.97556	0.0145055	5.92402	-0.0840824	0.0315387	7.10759	7.19445	7.1114
rs79068646	16725894		A	G	0.0148964	0.016838	0.387802	40424	0.273259	0.110681	6.09539	5.97261	0.0145298	6.10887	0.285335	0.104427	7.46598	7.26806	7.48732
rs10810761	17331446		A	T	0.600778	0.602268	0.849291	40424	0.0471735	0.0193249	5.95884	5.96801	0.0145677	5.95979	0.035669	0.0184146	3.75194	3.757	3.75228
rs10756822	16876337		G	C	0.750313	0.751438	0.973858	40424	0.0489991	0.0200952	5.94557	5.96702	0.0145759	5.94672	0.0422627	0.0192295	4.83037	4.84902	4.83108
rs10733321	16784682		C	G	0.221059	0.234384	0.882589	40424	0.0541212	0.0221219	5.98535	5.96454	0.0145964	5.98659	0.0469087	0.0210704	4.95635	4.93717	4.95715
rs3840727	17333747		CAT	C	0.599241	0.600516	0.849246	40424	0.0471244	0.0193117	5.95459	5.96363	0.0146039	5.95554	0.0353322	0.0184021	3.68643	3.69128	3.68676
rs189719713	17144573		A	G	0.00403067	0.00299048	0.32016	40424	-0.680902	0.288018	5.58894	5.95823	0.0146487	5.6295	-0.819426	0.276075	8.80976	9.64069	8.91921
rs12341542	16788253		T	C	0.0847663	0.0886798	0.68384	40424	0.0916954	0.0374398	5.99831	5.94782	0.0147355	6.00119	0.0685889	0.0355497	3.72251	3.69233	3.72358
rs10962995	17280999		A	G	0.0784376	0.0709563	0.993864	40424	-0.0813771	0.0335882	5.8699	5.92954	0.0148891	5.87282	-0.0918283	0.032066	8.20095	8.31937	8.20662
rs12379104	17372261		G	T	0.609676	0.611528	0.850677	40424	0.0472799	0.0194449	5.91207	5.92144	0.0149577	5.91301	0.03542	0.0185155	3.65954	3.66472	3.65987
rs10119731	16792350		A	C	0.0801092	0.0839299	0.80152	40424	0.0867758	0.0355155	5.96981	5.92054	0.0149654	5.97258	0.059702	0.033755	3.12826	3.10539	3.12899
rs138016286	16525291		A	G	0.00990776	0.00827312	0.30669	40424	-0.422822	0.177446	5.67784	5.91457	0.0150162	5.70016	-0.480563	0.169331	8.05431	8.51443	8.10095
rs7024466	16775725		T	C	0.756278	0.743213	0.905964	40424	-0.0513102	0.0210811	5.92406	5.90596	0.0150897	5.92521	-0.0441843	0.0201124	4.82622	4.80978	4.82692
rs12685518	16677496		C	G	0.226248	0.238778	0.674853	40424	0.0604461	0.0248646	5.9098	5.89038	0.0152238	5.91099	0.0630255	0.023665	7.09282	7.06312	7.09439
rs10963070	17373817		C	G	0.0796659	0.0721235	0.964891	40424	-0.0816401	0.0338135	5.82944	5.8887	0.0152383	5.83232	-0.0940147	0.0322645	8.49069	8.61588	8.49677
rs10810704	16997811		A	G	0.321545	0.315793	0.995274	40424	-0.0456494	0.01884	5.87097	5.88518	0.0152688	5.87195	-0.0380696	0.0180013	4.4725	4.48366	4.47303
rs117373804	16668824		G	T	0.0198047	0.0179029	0.217841	40424	-0.34667	0.145101	5.70815	5.87628	0.0153462	5.72081	-0.375318	0.138028	7.39378	7.67922	7.41554
rs4471140	16891761		A	G	0.0387337	0.036076	0.951756	40424	-0.113738	0.0472741	5.78849	5.8762	0.0153469	5.79411	-0.119984	0.0454083	6.98197	7.12009	6.98985
rs12235811	17297677		A	G	0.0776802	0.0702014	0.982769	40424	-0.0816823	0.0339154	5.80045	5.85938	0.0154943	5.80332	-0.0934087	0.0323677	8.32819	8.45011	8.33406
rs144584987	17134903		A	G	0.00349155	0.00413998	0.448007	40424	0.515053	0.208822	6.0835	5.84808	0.0155941	6.13316	0.426932	0.194556	4.81538	4.61718	4.85103
rs142749226	16832617		C	T	0.0143449	0.0155955	0.3958	40424	0.274465	0.112257	5.97789	5.84307	0.0156385	5.99473	0.241903	0.105959	5.21205	5.08112	5.22529
rs12341168	16793202		T	C	0.0785	0.0823914	0.803957	40424	0.0867349	0.0357633	5.88184	5.83333	0.0157253	5.88454	0.0610192	0.0339838	3.22395	3.19986	3.22474
rs77872009	17348688		G	C	0.599375	0.601926	0.803612	40424	0.0479372	0.0198741	5.81795	5.82708	0.0157813	5.81887	0.0386727	0.0189534	4.16325	4.16952	4.16368
rs10810770	17348689		G	C	0.599375	0.601926	0.803612	40424	0.0479371	0.0198741	5.81794	5.82706	0.0157815	5.81885	0.0386727	0.0189534	4.16326	4.16953	4.16368
rs142987120	16663293		G	C	0.00204929	0.00179933	0.138281	40424	-1.34793	0.57676	5.4619	5.82448	0.0158046	5.50971	-1.09433	0.552465	3.92361	4.19109	3.95033
rs188014755	17112062		C	G	0.00193836	0.00142953	0.439484	40424	-0.804327	0.348604	5.32353	5.81992	0.0158457	5.42453	-0.74292	0.338446	4.81842	5.31779	4.90007
rs73645993	16520909		A	G	0.0170589	0.0153736	0.387015	40424	-0.279397	0.117702	5.63475	5.8188	0.0158558	5.65102	-0.304216	0.111011	7.50984	7.82961	7.53813
rs35340571	16886714		AT	A	0.753897	0.754841	0.974354	40424	0.0489102	0.0203208	5.79319	5.81462	0.0158935	5.79431	0.0417528	0.0194461	4.61004	4.62809	4.6107
rs263569	17030146		A	G	0.16657	0.156895	0.986556	40424	-0.0572868	0.0238277	5.78022	5.81288	0.0159092	5.78173	-0.0653477	0.0227907	8.22136	8.28822	8.22425
rs6475147	17374797		T	G	0.613692	0.615596	0.851076	40424	0.0469061	0.0194735	5.80188	5.81132	0.0159233	5.80279	0.0356354	0.0185432	3.69312	3.69858	3.69346
rs200344076	16689114		AAC	A	0.00689587	0.00583939	0.194616	40424	-0.648134	0.278242	5.42607	5.80516	0.0159792	5.47582	-0.801556	0.267367	8.98777	9.8564	9.08046
rs605482	17290979		T	C	0.363485	0.361301	0.830587	40424	-0.0478719	0.0198915	5.79195	5.80314	0.0159976	5.79288	-0.0345663	0.0189702	3.32017	3.32568	3.32044
rs10962530	16667568		T	C	0.620475	0.603244	0.868101	40424	-0.0460865	0.0191214	5.80909	5.80207	0.0160073	5.81	-0.0471591	0.0182431	6.68245	6.67184	6.68355
rs116996265	16796923		A	G	0.00380391	0.00348242	0.125103	40424	-1.04862	0.4486	5.46407	5.79627	0.0160602	5.50031	-1.08747	0.429244	6.41838	6.94827	6.48241
rs145971975	17016682		A	G	0.0036045	0.00315546	0.258942	40424	-0.722286	0.310933	5.39616	5.79506	0.0160713	5.47506	-0.535956	0.305161	3.08461	3.27267	3.10385
rs10125996	16792675		G	C	0.0779764	0.081586	0.80358	40424	0.0867704	0.0359007	5.84167	5.79331	0.0160873	5.84436	0.060529	0.0341179	3.14747	3.12405	3.14823
rs4448381	16802531		T	C	0.755179	0.741984	0.944196	40424	-0.0500074	0.0207507	5.80769	5.79101	0.0161083	5.80877	-0.0398358	0.0197907	4.05157	4.03937	4.05206
rs10120562	16793104		A	G	0.0784444	0.0820723	0.806152	40424	0.0864313	0.0357688	5.83894	5.79075	0.0161107	5.84162	0.0596874	0.0339892	3.08378	3.06114	3.0845
rs186959975	16836370		T	C	0.00237324	0.00303498	0.412957	40424	0.619733	0.253775	5.96364	5.78437	0.0161693	6.05038	0.671002	0.237836	7.95963	7.55301	8.0976
rs10756858	17268228		T	C	0.430637	0.429534	0.867044	40424	-0.0454277	0.018901	5.77663	5.78284	0.0161834	5.7775	-0.0334429	0.0180067	3.44937	3.45244	3.44965
rs2243719	16807307		A	T	0.0723668	0.0756344	0.739419	40424	0.0936866	0.0388064	5.82837	5.77724	0.016235	5.83136	0.0547136	0.0368101	2.20931	2.19445	2.20973
rs7025647	16508871		G	C	0.0176366	0.0159362	0.389571	40424	-0.272331	0.115088	5.59925	5.7761	0.0162455	5.61452	-0.296067	0.108507	7.44499	7.75043	7.47142
rs191755252	16660667		G	A	0.00093169	0.00078759	0.163565	40424	-1.82157	0.810282	5.05381	5.75807	0.0164131	5.23807	-1.3254	0.798557	2.75474	3.06136	2.80315
rs263642	17016894		C	T	0.00574872	0.00744177	0.4842	40424	0.352959	0.145732	5.86595	5.75179	0.0164719	5.90232	0.406006	0.141305	8.25563	8.00222	8.32292
rs10963056	17348426		C	T	0.0775861	0.0701205	0.986101	40424	-0.0807833	0.0338722	5.68795	5.74533	0.0165325	5.69072	-0.0931473	0.0323327	8.2996	8.42134	8.30546
rs11560448	17265321		G	A	0.429202	0.42816	0.866045	40424	-0.0452956	0.0189253	5.72834	5.73453	0.0166345	5.7292	-0.0329968	0.0180275	3.3502	3.35317	3.35047
rs12380481	16791865		C	T	0.0786842	0.0823622	0.804832	40424	0.0856897	0.0357028	5.76042	5.71321	0.0168377	5.76303	0.0597575	0.0339352	3.10088	3.07807	3.10161
rs184616742	17023070		C	T	0.00199924	0.00308649	0.444201	40424	0.604768	0.249683	5.86676	5.71079	0.0168609	5.92622	0.76242	0.237943	10.267	9.78663	10.4432
rs10962601	16796252		T	G	0.0778055	0.081399	0.813045	40424	0.0856101	0.0357172	5.74505	5.69826	0.0169817	5.74763	0.0589611	0.0339551	3.01525	2.9934	3.01593
rs416529	17045105		T	A	0.129883	0.119447	0.939215	40424	-0.0649593	0.0273297	5.64954	5.68944	0.0170673	5.65137	-0.0799066	0.0261173	9.36072	9.46433	9.36549
rs381912	17045066		C	G	0.129882	0.119447	0.939214	40424	-0.0649515	0.0273298	5.64814	5.68802	0.0170811	5.64997	-0.0799022	0.0261173	9.35965	9.46325	9.36442
rs147600475	16773821		C	T	0.000556474	0.000425479	0.123634	40424	-3.03681	1.36193	4.97191	5.68628	0.0170981	5.1479	-2.97136	1.3226	5.0472	5.96741	5.16829
rs113842957	17241002		G	A	0.0160746	0.013072	0.620056	40424	-0.227387	0.0967085	5.52845	5.68443	0.0171161	5.54141	-0.259186	0.092481	7.85452	8.16733	7.87999
rs10810617	16761621		G	A	0.0704548	0.0738652	0.731326	40424	0.0942741	0.0393715	5.73351	5.68187	0.0171411	5.73651	0.0657362	0.037368	3.09463	3.06956	3.09546
rs10115109	16790074		T	G	0.078535	0.0823515	0.795059	40424	0.0859261	0.0359103	5.7255	5.67849	0.0171741	5.72808	0.0607852	0.0341296	3.17201	3.14832	3.17278
rs151039944	17153593		T	C	0.00520052	0.00646207	0.292626	40424	0.493268	0.204999	5.78979	5.67308	0.0172272	5.81828	0.597	0.194453	9.42582	9.11323	9.50407
rs77211505	16670847		G	C	0.0197828	0.0179107	0.218016	40424	-0.340212	0.144958	5.50824	5.66715	0.0172855	5.52005	-0.367956	0.137868	7.12301	7.39212	7.14322
rs186192840	17381415		C	T	0.00125212	0.00165599	0.388935	40424	0.873225	0.35591	6.01967	5.65509	0.0174048	6.14385	0.628889	0.331645	3.59585	3.40917	3.65383
rs76914288	16654036		C	A	0.0193322	0.0210673	0.52611	40424	0.203207	0.0847611	5.74758	5.63994	0.0175558	5.75875	0.155744	0.079762	3.81267	3.7434	3.81777
rs72714999	16415775		C	T	0.119202	0.122239	0.537103	40424	0.0857687	0.0360028	5.67524	5.63843	0.0175709	5.67739	0.0810516	0.0343762	5.55913	5.51367	5.56108
rs183163455	17059124		C	T	0.00128987	0.00163305	0.135856	40424	1.43565	0.593822	5.84498	5.63137	0.0176418	5.95642	1.39814	0.557023	6.30026	6.03339	6.44482
rs2183407	16790968		G	C	0.0785242	0.0823184	0.79603	40424	0.0854527	0.0358926	5.66814	5.62185	0.0177379	5.67068	0.0603488	0.0341141	3.12946	3.10626	3.13021
rs200662723	16996639		AAG	A	0.320475	0.314784	0.984159	40424	-0.0447087	0.0189047	5.59298	5.6063	0.017896	5.59388	-0.0375779	0.0180626	4.32819	4.3389	4.32869
rs4424358	17295223		T	C	0.379632	0.377347	0.859435	40424	-0.0458494	0.0193978	5.58681	5.59619	0.0179996	5.58766	-0.0361305	0.0184889	3.8188	3.82482	3.81916
rs7035227	16498437		A	T	0.0172651	0.0156694	0.37272	40424	-0.27588	0.118536	5.41673	5.58517	0.0181132	5.43141	-0.301726	0.111989	7.25898	7.55782	7.28477
rs1596193	17371690		C	T	0.598332	0.599588	0.845745	40424	0.0457185	0.0193693	5.57127	5.57922	0.0181748	5.5721	0.0348846	0.0184563	3.57256	3.57708	3.57286
rs2183406	16790960		A	G	0.0787017	0.0824985	0.796248	40424	0.0849708	0.0358541	5.61645	5.57083	0.0182621	5.61893	0.0601445	0.034076	3.11526	3.09224	3.116
rs151115306	16690327		T	A	0.000838907	0.000536759	0.149714	40424	-2.38847	1.08864	4.81358	5.56986	0.0182722	4.87528	-3.34938	1.07339	9.73681	12.1373	10.0453
rs10963071	17376453		T	A	0.595879	0.59811	0.813031	40424	0.0465547	0.0197439	5.55982	5.56796	0.0182921	5.56065	0.0369046	0.018814	3.84766	3.8529	3.84802
rs182518225	17068467		T	C	0.000942941	0.000587375	0.363722	40424	-1.33169	0.61063	4.75609	5.56734	0.0182985	4.97544	-1.50836	0.615569	6.00423	7.29392	6.27451
rs10963027	17313996		T	G	0.603944	0.605965	0.818464	40424	0.0465095	0.0197429	5.54957	5.55827	0.0183936	5.55041	0.0340115	0.0188	3.27292	3.27733	3.27318
rs10810610	16756256		G	C	0.0714793	0.0758196	0.686609	40424	0.0950637	0.0401449	5.60748	5.55787	0.0183978	5.61031	0.0752148	0.0380892	3.89945	3.86463	3.90078
rs76106830	16839434		G	A	0.029443	0.0269173	0.732411	40424	-0.144575	0.0619019	5.4548	5.55356	0.0184431	5.46182	-0.144082	0.059571	5.84988	5.97944	5.85753
rs7858762	17354527		T	C	0.554896	0.556963	0.708268	40424	0.0492131	0.0209037	5.54263	5.54943	0.0184867	5.54345	0.0371256	0.0199197	3.4736	3.47732	3.47389
rs7858760	17354520		T	C	0.554896	0.556963	0.708269	40424	0.0492128	0.0209037	5.54257	5.54938	0.0184872	5.54339	0.0371253	0.0199197	3.47355	3.47727	3.47384
rs149955217	16844031		G	A	0.0017299	0.00127947	0.18898	40424	-1.3569	0.603753	5.05098	5.54557	0.0185275	5.1139	-1.5942	0.582436	7.49184	8.54117	7.62601
rs16934893	16657436		C	T	0.00612538	0.00613506	0.104151	40424	-0.834959	0.362206	5.31397	5.53948	0.0185921	5.35363	-0.415486	0.33549	1.53375	1.56884	1.53692
rs112318040	16806728		A	C	0.00990903	0.011912	0.611748	40424	0.248092	0.104306	5.65722	5.53645	0.0186243	5.67523	0.300473	0.0991068	9.19189	8.87047	9.23903
rs2056684	16978916		A	G	0.735818	0.727681	0.945795	40424	-0.047558	0.02019	5.54848	5.53356	0.0186551	5.54945	-0.0448989	0.0192712	5.42818	5.41017	5.42905
rs148676518	16850102		T	A	0.0103348	0.0117093	0.267947	40424	0.369145	0.155087	5.66554	5.53103	0.0186821	5.68812	0.372412	0.148393	6.2983	6.10664	6.32589
rs200582213	16914557		T	TTTC	0.0833584	0.0802724	0.930557	40424	-0.0771013	0.0329483	5.47593	5.52434	0.0187537	5.47833	-0.0807986	0.0315899	6.54199	6.619	6.54525
rs6475096	16914412		T	C	0.0365908	0.0340911	0.894016	40424	-0.116509	0.0499624	5.43789	5.52126	0.0187867	5.44345	-0.112009	0.0481353	5.41474	5.51387	5.41993
rs10810752	17314532		T	G	0.623045	0.625404	0.862012	40424	0.0455362	0.0194033	5.50761	5.51698	0.0188327	5.50844	0.0362153	0.0184909	3.83591	3.84211	3.83627
rs36057268	17379340		T	C	0.604215	0.605481	0.847305	40424	0.0455063	0.019393	5.50622	5.51444	0.0188601	5.50704	0.0352342	0.0184791	3.63552	3.64044	3.63584
rs10756792	16726119		C	T	0.749994	0.740443	0.720387	40424	-0.0553111	0.0235204	5.53014	5.51311	0.0188745	5.5312	-0.0470858	0.0223541	4.43677	4.42148	4.43739
rs10810748	17312829		G	A	0.62302	0.625373	0.861996	40424	0.0455154	0.0194031	5.50266	5.512	0.0188864	5.50348	0.0361895	0.0184908	3.83049	3.83668	3.83085
rs149277976	16994979		G	C	0.000498598	0.000321139	0.233838	40424	-2.80618	1.4041	3.99422	5.51145	0.0188924	4.25686	-2.81989	1.36099	4.29297	6.16215	4.66321
rs6475082	16789436		G	A	0.92091	0.916856	0.751081	40424	-0.0872161	0.0369949	5.5579	5.51117	0.0188954	5.56045	-0.0585001	0.0350298	2.78894	2.76869	2.78957
rs10963026	17313926		C	T	0.621949	0.624164	0.862475	40424	0.0454686	0.0193852	5.50155	5.51082	0.0188992	5.50238	0.0358509	0.0184733	3.76628	3.77225	3.76663
rs150945065	16865450		C	T	0.00633737	0.00811147	0.57392	40424	0.311119	0.130786	5.65885	5.51031	0.0189047	5.68589	0.40886	0.125174	10.669	10.2079	10.7653
rs10756794	16726226		G	A	0.74999	0.740438	0.720785	40424	-0.055259	0.0235149	5.52231	5.50531	0.0189588	5.52337	-0.0470784	0.0223485	4.43759	4.42229	4.43821
rs118061553	16633979		C	T	0.00273274	0.00225549	0.191973	40424	-0.986537	0.432928	5.19273	5.5009	0.0190067	5.2285	-1.14344	0.417519	7.50023	8.11089	7.56776
rs10810749	17312886		A	T	0.62163	0.623804	0.862445	40424	0.0454042	0.0193809	5.48837	5.49758	0.0190428	5.48919	0.0356716	0.0184693	3.73032	3.73619	3.73066
rs11535436	17267108		G	T	0.0714256	0.0678746	0.655559	40424	-0.0995218	0.0426548	5.44378	5.49312	0.0190914	5.44613	-0.103383	0.0408266	6.41231	6.48766	6.41545
rs77376504	16830655		G	A	0.00211446	0.00159868	0.403367	40424	-0.810169	0.368941	4.82213	5.49201	0.0191036	4.96435	-0.731504	0.351502	4.33089	4.93881	4.44805
rs10962907	17211990		G	A	0.22317	0.221408	0.827337	40424	-0.0538766	0.0230591	5.45903	5.48135	0.0192204	5.46013	-0.0336621	0.0220229	2.33632	2.34368	2.33651
rs10810751	17314292		A	T	0.622355	0.624599	0.862363	40424	0.0453523	0.0193891	5.4712	5.48041	0.0192307	5.47201	0.0358527	0.0184774	3.76496	3.77095	3.76531
rs10120138	16780518		C	T	0.078338	0.0822768	0.775959	40424	0.0853515	0.0363419	5.51577	5.47048	0.0193403	5.51825	0.0659307	0.0345281	3.64611	3.6164	3.64715
rs77873567	17165135		C	A	0.0102736	0.0106246	0.259507	40424	0.405137	0.170927	5.61801	5.46558	0.0193946	5.63471	0.0788604	0.16027	0.242109	0.240473	0.242142
rs79721685	16651286		A	T	0.0192034	0.0208977	0.530204	40424	0.19987	0.0847552	5.56113	5.45841	0.0194744	5.57162	0.152912	0.0797668	3.67483	3.60905	3.67958
rs80023160	16849647		G	A	0.00435461	0.0035963	0.293716	40424	-0.624726	0.276575	5.10215	5.45605	0.0195007	5.14841	-0.648687	0.270934	5.73247	6.23153	5.78935
rs79982383	16743232		G	GT	0.0673119	0.0706869	0.721337	40424	0.0949283	0.0404557	5.50594	5.45491	0.0195134	5.50882	0.0647487	0.0383718	2.84733	2.82443	2.84808
rs34536017	16861502		TG	T	0.0638926	0.0597422	0.955202	40424	-0.0865671	0.037265	5.3964	5.45364	0.0195276	5.39926	-0.0910191	0.0356503	6.51834	6.60979	6.52243
rs62541798	16972579		G	A	0.175911	0.184203	0.952932	40424	0.054136	0.0231391	5.47367	5.45001	0.0195682	5.47492	0.0499816	0.0220488	5.13867	5.11214	5.13972
rs5016911	16751755		G	A	0.221754	0.232916	0.830069	40424	0.0532306	0.0227715	5.46434	5.44586	0.0196148	5.46539	0.0418046	0.02169	3.71473	3.70197	3.71519
rs5016916	16751917		C	A	0.220406	0.231482	0.825021	40424	0.0535081	0.0228992	5.4601	5.44155	0.0196632	5.46115	0.0418521	0.0218062	3.68361	3.67097	3.68406
rs190848809	17259201		A	G	0.0748743	0.0677765	0.951862	40424	-0.0813637	0.0350535	5.38763	5.44086	0.019671	5.39016	-0.0947905	0.0334564	8.02733	8.14402	8.03289
rs12378598	16788363		A	G	0.0755155	0.0791562	0.757386	40424	0.0876745	0.0374332	5.48571	5.44009	0.0196797	5.48822	0.0632745	0.0355841	3.16188	3.13745	3.16269
rs7849084	17313614		A	C	0.620911	0.623104	0.857988	40424	0.0452648	0.0194278	5.42841	5.43747	0.0197092	5.42921	0.0356203	0.0185144	3.70149	3.70729	3.70183
rs7849085	17313619		A	G	0.620911	0.623104	0.857988	40424	0.0452647	0.0194278	5.4284	5.43746	0.0197093	5.4292	0.0356202	0.0185144	3.70147	3.70728	3.70181
rs10756807	16756041		G	A	0.758612	0.74711	0.823439	40424	-0.0516373	0.0221231	5.44798	5.43206	0.0197703	5.44894	-0.0444981	0.0210771	4.4572	4.44272	4.45781
rs77122352	16646578		C	G	0.0192112	0.0208995	0.531328	40424	0.199127	0.0846637	5.53179	5.42987	0.0197952	5.54217	0.152062	0.0796848	3.6416	3.5767	3.64627
rs182350087	16511616		G	T	0.0101292	0.00835925	0.314329	40424	-0.3968	0.173579	5.22576	5.42712	0.0198264	5.24358	-0.495756	0.166133	8.90482	9.42717	8.95849
rs10962955	17260010		C	T	0.385101	0.383166	0.815378	40424	-0.0462395	0.0198699	5.41546	5.42356	0.0198668	5.41626	-0.0348233	0.0189316	3.3835	3.38798	3.38378
rs7031867	16856867		A	T	0.0718124	0.0679561	0.991094	40424	-0.0799896	0.0345357	5.36453	5.41682	0.0199437	5.36708	-0.0766277	0.0330698	5.36918	5.43228	5.37168
rs1330304	16714629		C	G	0.740633	0.731512	0.69092	40424	-0.0554071	0.023773	5.43204	5.41646	0.0199478	5.43305	-0.0461771	0.0225823	4.18136	4.16809	4.1819
rs10756793	16726169		G	A	0.749934	0.740433	0.720557	40424	-0.0547925	0.0235158	5.42906	5.41249	0.0199932	5.43008	-0.046691	0.0223507	4.364	4.34908	4.3646
rs6475095	16913903		A	G	0.0360908	0.0336084	0.897965	40424	-0.115793	0.0501506	5.33108	5.41225	0.0199959	5.33645	-0.111946	0.0483172	5.36797	5.4661	5.37309
rs76329402	16689133		T	C	0.000944589	0.000796897	0.288606	40424	-1.32416	0.602173	4.8355	5.41051	0.0200159	4.94677	-0.965671	0.574003	2.83029	3.088	2.87096
rs191249391	17400220		C	T	0.00453715	0.00498412	0.19738	40424	0.659899	0.279886	5.55892	5.40688	0.0200575	5.60055	0.625154	0.261902	5.69768	5.48998	5.73507
rs12378102	16996457		T	G	0.315087	0.309951	0.97167	40424	-0.0443414	0.019096	5.39178	5.40469	0.0200827	5.39262	-0.036538	0.0182473	4.0095	4.0193	4.00993
rs12376716	16996456		C	T	0.315087	0.309952	0.971669	40424	-0.0443406	0.019096	5.39159	5.4045	0.0200849	5.39243	-0.0365371	0.0182473	4.00932	4.01911	4.00975
rs200468715	16476564		TTTA	T	0.0522023	0.0546652	0.616993	40424	0.115751	0.0495571	5.45551	5.40259	0.0201069	5.45856	0.0855995	0.046928	3.3272	3.29614	3.32836
rs7019402	16869240		T	C	0.908872	0.896543	0.990985	40424	-0.0677138	0.0290422	5.4362	5.40021	0.0201343	5.43816	-0.094353	0.027771	11.5433	11.4064	11.5519
rs12003902	16506261		G	C	0.0185386	0.0169612	0.379636	40424	-0.258588	0.112911	5.245	5.39656	0.0201765	5.25757	-0.274356	0.10646	6.6413	6.88574	6.66085
rs10962923	17235432		A	G	0.137939	0.132999	0.931153	40424	-0.0612993	0.0264951	5.35279	5.38579	0.0203014	5.35424	-0.0672603	0.0253226	7.05508	7.11453	7.05749
rs1330298	16755121		A	G	0.228825	0.240098	0.841565	40424	0.0520814	0.0224062	5.40294	5.38548	0.020305	5.40395	0.0400477	0.0213313	3.5247	3.51338	3.52509
rs140330765	17078340		A	G	0.00231635	0.00192207	0.255897	40424	-0.894274	0.402006	4.94852	5.37955	0.0203741	5.0383	-0.78116	0.387804	4.05748	4.41283	4.11475
rs73417433	16509895		T	A	0.0178095	0.0161616	0.385996	40424	-0.26232	0.114836	5.21803	5.37594	0.0204163	5.23121	-0.286666	0.108204	7.01886	7.29594	7.04218
rs73415502	16497948		C	T	0.0182424	0.0166825	0.374858	40424	-0.261359	0.114478	5.21229	5.3647	0.0205483	5.22505	-0.278111	0.108098	6.61918	6.86748	6.63921
rs189407935	17145437		A	C	0.00429785	0.00367232	0.57059	40424	-0.426101	0.188523	5.10855	5.35743	0.0206342	5.14351	-0.364852	0.181534	4.0394	4.24156	4.0613
rs181259223	17145442		C	G	0.00429785	0.00367232	0.57059	40424	-0.426101	0.188523	5.10855	5.35743	0.0206342	5.14351	-0.364852	0.181534	4.0394	4.24156	4.0613
rs141091670	16889604		A	G	0.00551522	0.00710915	0.481885	40424	0.357015	0.1522	5.50229	5.35607	0.0206503	5.53158	0.492873	0.145221	11.5189	10.9943	11.6477
rs10116407	16726654		T	C	0.0755625	0.079937	0.678448	40424	0.0915727	0.0394128	5.39829	5.35219	0.0206963	5.4008	0.0707078	0.0373655	3.58091	3.55106	3.58198
rs4431684	16894267		C	G	0.0394549	0.0370208	0.93647	40424	-0.108007	0.0471119	5.2558	5.33147	0.0209437	5.26041	-0.113999	0.0452202	6.35533	6.47483	6.36186
rs139834460	16599863		C	T	0.00220594	0.00180992	0.167679	40424	-1.17788	0.532963	4.88436	5.32638	0.021005	4.95767	-1.27588	0.515671	6.1217	6.80764	6.22326
rs7850168	16766118		C	A	0.926005	0.92291	0.805754	40424	-0.0853148	0.0368104	5.37165	5.32603	0.0210092	5.37406	-0.0639873	0.0348367	3.37375	3.34606	3.37471
rs6475083	16791121		A	G	0.928314	0.925041	0.785299	40424	-0.0876662	0.0378436	5.36635	5.32044	0.0210767	5.36888	-0.0541365	0.0358668	2.27822	2.26255	2.27867
rs12238070	16754595		G	A	0.0670721	0.0703578	0.722525	40424	0.0937672	0.0404845	5.36443	5.31531	0.0211388	5.36716	0.0632928	0.0384086	2.71552	2.69414	2.7162
rs1952688	16782156		A	G	0.0794855	0.0836577	0.780265	40424	0.0832217	0.0359605	5.35576	5.31302	0.0211666	5.35808	0.0665587	0.0341835	3.79119	3.76009	3.79231
rs7858802	16497753		A	G	0.0182731	0.0167198	0.374606	40424	-0.259773	0.114369	5.15912	5.3089	0.0212167	5.1716	-0.276767	0.108004	6.56679	6.8118	6.58647
rs7038494	16854075		T	C	0.0703576	0.0663526	0.97199	40424	-0.0802847	0.0350313	5.25234	5.30403	0.0212761	5.25485	-0.0781597	0.0335361	5.43175	5.49732	5.43437
rs79857260	16485362		T	G	0.0570771	0.0595199	0.861559	40424	0.093583	0.0404398	5.3552	5.30378	0.0212792	5.35805	0.0592144	0.0382948	2.39098	2.37192	2.39156
rs185902554	17025114		T	C	0.00094612	0.00113593	0.230826	40424	1.31572	0.558257	5.55467	5.28645	0.021492	5.69726	0.857108	0.503794	2.89444	2.74973	2.94835
rs142383166	16854877		C	T	0.00136728	0.00170437	0.142907	40424	1.30274	0.558496	5.441	5.28562	0.0215022	5.54314	1.38219	0.528821	6.83151	6.47964	6.98268
rs143906359	16807350		T	C	0.00198092	0.00145995	0.532313	40424	-0.690147	0.314219	4.82413	5.27604	0.0216209	4.90597	-0.732328	0.305742	5.73722	6.39826	5.85187
rs10962537	16678263		T	C	0.0864484	0.093392	0.466736	40424	0.101757	0.0441678	5.30782	5.26945	0.0217029	5.30993	0.130064	0.0419712	9.60302	9.48968	9.60979
rs80185362	16900561		A	C	0.0106875	0.0134733	0.385343	40424	0.285335	0.123187	5.36519	5.2638	0.0217734	5.37938	0.43081	0.118413	13.2365	12.7837	13.323
rs7043675	16913477		T	C	0.0359176	0.0334755	0.899826	40424	-0.114283	0.0501902	5.18471	5.26256	0.0217889	5.1898	-0.110775	0.0483569	5.24762	5.34248	5.25252
rs1337386	16733410		T	C	0.0677011	0.0709997	0.721573	40424	0.0930037	0.0403696	5.30753	5.2591	0.0218323	5.31019	0.0626475	0.0382788	2.6785	2.65759	2.67916
rs113446774	16458441		T	G	0.00257265	0.00219032	0.162652	40424	-1.07862	0.48873	4.87079	5.25591	0.0218724	4.93354	-1.21656	0.477606	6.4882	7.17683	6.58815
rs111829497	16519523		G	A	0.00728912	0.00862334	0.404181	40424	0.347521	0.14972	5.38768	5.25256	0.0219145	5.41105	0.389413	0.142285	7.49037	7.21725	7.53453
rs1582029	17243746		C	T	0.139655	0.134793	0.932117	40424	-0.060194	0.0263459	5.22013	5.25157	0.021927	5.22149	-0.0667216	0.0251844	7.01889	7.07733	7.02125
rs7865470	16766002		T	G	0.768277	0.76622	0.389398	40424	-0.0763281	0.0332455	5.27113	5.24896	0.0219599	5.27234	-0.0494124	0.031511	2.45893	2.45005	2.45918
rs7024720	16775905		T	G	0.0701772	0.0735379	0.780259	40424	0.0875854	0.0381237	5.27804	5.23257	0.0221678	5.28055	0.0644436	0.036222	3.1653	3.13946	3.16618
rs28626673	16763554		C	T	0.067993	0.0710567	0.767661	40424	0.089836	0.0391102	5.2762	5.23008	0.0221995	5.27877	0.0602318	0.0371431	2.62963	2.60969	2.63025
rs67956400	16888249		GA	G	0.0805734	0.0777474	0.961736	40424	-0.0749105	0.0328993	5.18456	5.22971	0.0222042	5.18677	-0.0727623	0.0315342	5.32415	5.38124	5.32636
rs200286088	16914559		T	TC	0.0821281	0.0792348	0.941675	40424	-0.0750234	0.0329524	5.18347	5.22812	0.0222245	5.18563	-0.0782935	0.0315894	6.14284	6.21301	6.14573
rs139279398	16846922		T	C	0.00105017	0.000780704	0.200571	40424	-1.74453	0.827969	4.43945	5.22374	0.0222806	4.55961	-1.5868	0.773776	4.20549	5.0176	4.32692
rs201811110	16914558		T	TTC	0.0821766	0.0792775	0.941902	40424	-0.0749562	0.0329416	5.17757	5.22212	0.0223013	5.17972	-0.0782672	0.0315777	6.14325	6.21339	6.14613
rs141752991	16935129		G	A	0.0113593	0.0123844	0.797696	40424	0.208084	0.0900401	5.3408	5.22018	0.0223262	5.35438	0.132929	0.0851112	2.43931	2.39251	2.4422
rs7862734	16762161		A	G	0.073429	0.0769306	0.7313	40424	0.0886657	0.038648	5.2633	5.21879	0.0223441	5.26575	0.0643016	0.0366795	3.07324	3.04898	3.07404
rs7847232	16765987		G	A	0.768181	0.766129	0.389346	40424	-0.0760657	0.0332428	5.23579	5.21385	0.0224077	5.23699	-0.0491955	0.031509	2.4377	2.42894	2.43794
rs10810590	16689291		C	T	0.832446	0.822298	0.697655	40424	-0.0629566	0.027512	5.23647	5.21327	0.0224151	5.23761	-0.0634471	0.0261179	5.90127	5.86914	5.90263
rs73419969	16736665		G	A	0.067017	0.0703081	0.723892	40424	0.0928191	0.0404735	5.25936	5.21154	0.0224375	5.26199	0.0629281	0.0383924	2.68658	2.66551	2.68725
rs7033342	16844645		C	T	0.996794	0.996406	0.125053	40424	-0.950114	0.408034	5.42199	5.20798	0.0224834	5.51834	-0.632683	0.386166	2.68426	2.58534	2.70683
rs7033341	16844644		C	A	0.996794	0.996406	0.125059	40424	-0.94995	0.408033	5.42015	5.20621	0.0225063	5.51643	-0.632591	0.386165	2.68349	2.5846	2.70605
rs143655232	16856611		G	A	0.000980316	0.00116967	0.206627	40424	1.35034	0.580757	5.4063	5.20296	0.0225485	5.53812	0.931263	0.531802	3.06652	2.92777	3.1085
rs114628647	16875899		G	T	0.000471281	0.000647491	0.164219	40424	2.05544	0.872851	5.54533	5.19826	0.0226095	5.80264	1.5457	0.806171	3.6762	3.4629	3.80672
rs10962576	16770634		C	T	0.069813	0.0731874	0.784159	40424	0.0874187	0.038179	5.24275	5.19789	0.0226143	5.24522	0.0622067	0.0362775	2.94035	2.91724	2.9411
rs77158067	16892381		C	T	0.0272868	0.0246426	0.834488	40424	-0.137156	0.0606996	5.10575	5.1942	0.0226624	5.11165	-0.149522	0.0582436	6.59043	6.74533	6.59986
rs112392170	16727079		G	T	0.000528238	0.000739854	0.159386	40424	1.86881	0.826042	5.1183	5.19356	0.0226707	5.55972	2.23172	0.800487	7.77268	7.79622	8.59906
rs139549555	17242250		A	G	0.00472655	0.00380623	0.500533	40424	-0.447789	0.20195	4.91653	5.19315	0.0226761	4.95623	-0.546211	0.196337	7.73956	8.38888	7.83176
rs4961760	16789878		C	T	0.927132	0.923863	0.784462	40424	-0.0860098	0.0376074	5.23057	5.18665	0.0227611	5.23294	-0.0532066	0.035642	2.22847	2.21341	2.22889
rs11562196	17266448		G	A	0.0855673	0.0822224	0.671825	40424	-0.0877353	0.0386744	5.14637	5.1855	0.0227761	5.14814	-0.0922128	0.0370252	6.2028	6.26478	6.20524
rs10810632	16789024		C	T	0.922168	0.918281	0.740727	40424	-0.0857273	0.0374921	5.22828	5.18521	0.0227799	5.23058	-0.0577135	0.0355252	2.63926	2.62037	2.63983
rs13296025	16900507		G	C	0.0774502	0.0744246	0.936303	40424	-0.0770166	0.0339776	5.13787	5.18322	0.022806	5.14009	-0.0757701	0.0325653	5.41359	5.47333	5.41593
rs12236540	16803158		G	A	0.00886974	0.0101127	0.29	40424	0.377071	0.163512	5.31801	5.18195	0.0228227	5.3361	0.321019	0.15413	4.33795	4.2264	4.35203
rs56395003	16906681		C	T	0.037867	0.0353784	0.94297	40424	-0.107482	0.0475927	5.10029	5.17327	0.022937	5.10477	-0.116738	0.0457436	6.51278	6.63854	6.51981
rs142336125	17047747		A	G	0.000423002	0.000276176	0.233829	40424	-3.11541	1.63897	3.6132	5.17147	0.0229608	3.86399	-2.75662	1.49449	3.40226	4.93205	3.72262
rs13291000	16855490		G	A	0.0703312	0.0662712	0.991203	40424	-0.0789713	0.0349211	5.11402	5.1636	0.023065	5.11639	-0.0780902	0.0334276	5.45735	5.52331	5.45999
rs139980681	16627429		AGTT	A	0.0338842	0.0375108	0.665261	40424	0.130635	0.0571562	5.22387	5.1628	0.0230757	5.22801	0.14937	0.0542389	7.58416	7.45446	7.59302
rs148389821	16967365		C	T	0.0110555	0.0119429	0.800595	40424	0.210427	0.0915804	5.27955	5.16213	0.0230846	5.29267	0.133138	0.086256	2.38247	2.33763	2.38523
rs78117593	16631262		C	G	0.0201235	0.0217533	0.556015	40424	0.186009	0.0811736	5.25093	5.15843	0.0231338	5.25967	0.139251	0.076503	3.31312	3.25777	3.31671
rs7862119	16686939		C	T	0.958166	0.955389	0.727798	40424	-0.114251	0.0500251	5.21608	5.15639	0.023161	5.21957	-0.107741	0.0473251	5.18299	5.11208	5.1867
rs147310090	16479769		CTTCT	C	0.0493112	0.0475659	0.48112	40424	-0.134648	0.0597156	5.08421	5.15567	0.0231706	5.08809	-0.111468	0.0565338	3.88762	3.94068	3.88986
rs140922993	16805125		T	C	0.00708515	0.0087822	0.634667	40424	0.276132	0.120296	5.26901	5.15495	0.0231802	5.28742	0.331763	0.114219	8.43686	8.1377	8.4828
rs1583988	17367616		T	G	0.596729	0.598833	0.800485	40424	0.0450954	0.0198892	5.14077	5.14818	0.0232708	5.14149	0.0378274	0.018966	3.97795	3.9837	3.97833
rs1583989	17367617		C	T	0.596729	0.598833	0.800485	40424	0.0450954	0.0198892	5.14077	5.14818	0.0232708	5.14149	0.0378274	0.018966	3.97795	3.9837	3.97833
rs7872831	17354758		C	T	0.621123	0.622996	0.857855	40424	0.0441004	0.0194556	5.13799	5.14629	0.0232961	5.13871	0.0348938	0.0185407	3.54194	3.54736	3.54225
rs2254193	16801850		A	C	0.066369	0.0690792	0.762929	40424	0.0908834	0.0399217	5.18264	5.13656	0.023427	5.18519	0.0532443	0.0377716	1.98709	1.97356	1.98745
rs12338608	16800470		C	T	0.0754219	0.0786047	0.790687	40424	0.0836521	0.0367846	5.17156	5.13062	0.0235073	5.17369	0.0531917	0.0349592	2.31508	2.3001	2.31549
rs7854818	17353689		T	C	0.621099	0.622956	0.857958	40424	0.0440274	0.0194541	5.1218	5.13006	0.0235149	5.12252	0.0348154	0.0185394	3.52658	3.53195	3.52688
rs7868684	17353918		A	G	0.62091	0.622753	0.857734	40424	0.0440234	0.0194546	5.12063	5.12887	0.023531	5.12134	0.0347994	0.0185399	3.52313	3.52849	3.52344
rs4961552	17368900		A	G	0.620124	0.621853	0.85939	40424	0.0439301	0.0194257	5.11411	5.12227	0.0236207	5.11482	0.0345865	0.0185122	3.49059	3.49583	3.49089
rs10810615	16759746		G	C	0.0693011	0.0722574	0.734192	40424	0.0900865	0.0396373	5.1655	5.12066	0.0236426	5.16795	0.0585807	0.0376262	2.42397	2.40635	2.42449
rs10962927	17239933		T	C	0.13888	0.134108	0.933618	40424	-0.0594449	0.0263494	5.08966	5.12002	0.0236513	5.09095	-0.0663556	0.0251875	6.94042	6.99809	6.94274
rs13300099	16862358		A	C	0.0657609	0.0616705	0.979962	40424	-0.0815736	0.0362405	5.06654	5.11793	0.0236798	5.06904	-0.085347	0.0346768	6.05759	6.13845	6.06107
rs7868700	17353987		A	G	0.62098	0.622814	0.857826	40424	0.0439719	0.0194542	5.10885	5.11706	0.0236917	5.10956	0.0347429	0.0185394	3.51189	3.51723	3.51219
rs187949718	16810097		T	C	0.00109157	0.000950883	0.112992	40424	-2.02699	0.964016	4.42114	5.11563	0.0237113	4.51913	-1.69335	0.935968	3.27321	3.73715	3.28369
c9_pos17012978	17022978		C	T	0.0355707	0.0332937	0.929459	40424	-0.111646	0.0497207	5.04214	5.11296	0.0237478	5.04664	-0.107438	0.0478039	5.05116	5.13862	5.05559
rs10756874	17356475		A	G	0.621638	0.623526	0.858215	40424	0.0439535	0.0194575	5.10285	5.11107	0.0237737	5.10356	0.035029	0.0185428	3.56864	3.57413	3.56895
rs7031782	16525841		A	G	0.0151089	0.0135968	0.390931	40424	-0.276222	0.1242	4.9462	5.11024	0.023785	4.96139	-0.300267	0.117517	6.52848	6.81149	6.55386
rs117027046	17176599		A	G	0.0203969	0.0178054	0.793509	40424	-0.163017	0.0729004	5.00041	5.1085	0.0238089	5.00824	-0.150262	0.0698723	4.62477	4.73963	4.63147
rs202052962	16476565		TTA	T	0.0532451	0.055655	0.607107	40424	0.112266	0.0494842	5.14706	5.09844	0.0239474	5.14976	0.0839703	0.0468631	3.21063	3.18121	3.2117
rs200867797	17031278		C	CAAAA	0.280344	0.268733	0.761346	40424	-0.0506133	0.0224448	5.08507	5.09839	0.0239481	5.08587	-0.0552144	0.0214574	6.62139	6.64528	6.62262
rs3808782	17340864		C	T	0.0785631	0.0713988	1	40424	-0.0750973	0.0334344	5.04502	5.09214	0.0240345	5.04715	-0.0867683	0.0319146	7.3917	7.49232	7.39626
rs10648042	17366296		A	ATTG	0.61892	0.620681	0.852972	40424	0.0439343	0.019491	5.0809	5.089	0.0240781	5.08161	0.0346643	0.0185732	3.48331	3.48855	3.48361
rs7024458	16478057		C	A	0.0704893	0.0732328	0.825696	40424	0.0846056	0.0373476	5.13184	5.08865	0.0240829	5.1341	0.0599916	0.0354118	2.87002	2.84765	2.87073
rs4961545	17358346		G	T	0.62153	0.623406	0.858693	40424	0.0438365	0.0194504	5.07943	5.0876	0.0240975	5.08013	0.0349509	0.0185359	3.55539	3.56086	3.55571
rs4961547	17358477		A	C	0.621531	0.623406	0.858693	40424	0.0438363	0.0194504	5.07938	5.08755	0.0240982	5.08008	0.0349509	0.0185359	3.55539	3.56085	3.5557
rs2150089	16770181		G	A	0.0693724	0.0725709	0.791121	40424	0.0864658	0.0381755	5.13002	5.08616	0.0241175	5.1324	0.0602521	0.0362637	2.76058	2.73939	2.76125
rs10810773	17356411		A	C	0.621529	0.623404	0.858701	40424	0.0438292	0.0194503	5.07781	5.08597	0.0241202	5.07851	0.034943	0.0185358	3.55384	3.5593	3.55415
rs191369175	17043036		C	T	0.00617657	0.00544575	0.442327	40424	-0.400215	0.181544	4.85986	5.08425	0.0241441	4.89009	-0.416938	0.174842	5.68658	6.03082	5.72677
rs10756810	16759936		C	T	0.0705421	0.0736089	0.735182	40424	0.0889688	0.0392879	5.12811	5.08415	0.0241455	5.13049	0.0588312	0.0372901	2.48903	2.47086	2.48957
rs7864271	17359669		G	A	0.621596	0.62346	0.858459	40424	0.0438105	0.0194487	5.07429	5.08245	0.0241692	5.075	0.0348585	0.0185347	3.53708	3.5425	3.53739
rs4961541	17355782		G	A	0.621526	0.623395	0.858735	40424	0.0438069	0.0194498	5.07291	5.08106	0.0241886	5.07361	0.0349196	0.0185353	3.54928	3.55473	3.54959
rs147971915	16611917		C	G	0.00627516	0.00706853	0.456191	40424	0.355133	0.155395	5.22282	5.08082	0.0241919	5.24333	0.272822	0.147805	3.40707	3.31663	3.4161
rs7861591	16804447		C	T	0.0784394	0.0821495	0.764304	40424	0.0829773	0.0366814	5.11714	5.07774	0.0242349	5.11915	0.0582718	0.0348666	2.79317	2.77386	2.79376
rs6475144	17352005		G	A	0.621044	0.622869	0.858612	40424	0.0437797	0.0194477	5.06767	5.07578	0.0242624	5.06838	0.0346787	0.0185333	3.50121	3.50652	3.50151
rs12682783	16863040		G	A	0.0656049	0.0615129	0.98253	40424	-0.0811531	0.0362095	5.02303	5.07372	0.0242912	5.02548	-0.0852067	0.03465	6.04701	6.12764	6.05048
rs10117034	16766031		C	T	0.0689552	0.0720457	0.761456	40424	0.0883059	0.0390352	5.11761	5.07369	0.0242916	5.12002	0.060028	0.0370637	2.62307	2.60329	2.62368
rs10114688	17353096		C	T	0.62031	0.622111	0.85571	40424	0.0438174	0.0194742	5.06258	5.07067	0.024334	5.06328	0.0346248	0.0185585	3.48088	3.48613	3.48117
rs10114730	17353077		G	T	0.620309	0.622111	0.855712	40424	0.0438159	0.0194742	5.06226	5.07035	0.0243385	5.06296	0.0346236	0.0185585	3.48065	3.48591	3.48095
rs10120757	17353087		A	G	0.620309	0.622111	0.855711	40424	0.0438159	0.0194742	5.06224	5.07033	0.0243387	5.06294	0.0346233	0.0185585	3.48057	3.48583	3.48087
rs12552688	16903374		C	T	0.0822265	0.079435	0.945279	40424	-0.0735007	0.0327805	5.02749	5.07014	0.0243414	5.02953	-0.073474	0.0314099	5.47184	5.53083	5.47413
rs6475145	17363218		A	C	0.621284	0.623101	0.858678	40424	0.0437435	0.0194429	5.06179	5.06989	0.0243449	5.06249	0.0347365	0.0185291	3.51451	3.51986	3.51482
rs113161050	17242313		TC	T	0.138685	0.133922	0.935154	40424	-0.0591579	0.0263521	5.0396	5.06952	0.0243501	5.04087	-0.0661636	0.0251894	6.89928	6.95645	6.90157
rs10810784	17397101		T	A	0.847742	0.851586	0.831467	40424	0.0601945	0.0268124	5.04015	5.06951	0.0243503	5.0414	0.064659	0.0255856	6.38656	6.43592	6.38846
rs2044119	17349864		C	T	0.621037	0.622848	0.858293	40424	0.0437475	0.0194472	5.06046	5.06855	0.0243638	5.06116	0.0345743	0.0185331	3.48025	3.48551	3.48055
rs2225598	17365613		T	C	0.621327	0.623145	0.858756	40424	0.0437364	0.0194424	5.06041	5.06851	0.0243643	5.06111	0.0347344	0.0185286	3.51426	3.51961	3.51456
rs7862069	17364157		A	C	0.621326	0.623144	0.858761	40424	0.0437355	0.0194423	5.06026	5.06835	0.0243666	5.06096	0.0347336	0.0185285	3.51413	3.51948	3.51444
rs10122987	17364514		T	C	0.620249	0.621941	0.8594	40424	0.0436949	0.0194248	5.06	5.06803	0.0243711	5.0607	0.0343761	0.0185111	3.44866	3.4538	3.44895
rs140632178	17213025		C	A	0.0202684	0.0176731	0.795127	40424	-0.162795	0.0730978	4.95993	5.06722	0.0243825	4.96765	-0.150978	0.0700428	4.64621	4.76219	4.653
rs10810777	17360179		C	G	0.621325	0.62314	0.858774	40424	0.0437258	0.0194421	5.05814	5.06623	0.0243964	5.05884	0.0347217	0.0185283	3.51182	3.51717	3.51213
0	16758189		A	ATT	0.0672541	0.0703525	0.722048	40424	0.0915129	0.0404861	5.10921	5.06373	0.0244316	5.11168	0.0615174	0.0384159	2.56433	2.54469	2.56494
rs1023778	17379161		A	C	0.863686	0.868575	0.916725	40424	0.0602211	0.0268433	5.03299	5.06352	0.0244346	5.03429	0.0685512	0.0256575	7.13841	7.19999	7.14092
rs2044120	17349834		T	A	0.62104	0.622848	0.858276	40424	0.0437216	0.0194476	5.0543	5.06237	0.0244508	5.055	0.0345641	0.0185333	3.47811	3.48336	3.4784
rs7028779	17350814		G	A	0.621046	0.622853	0.858287	40424	0.0437199	0.0194478	5.0538	5.06187	0.0244578	5.0545	0.0345545	0.0185335	3.47612	3.48137	3.47642
rs150587404	16713611		T	C	0.00252161	0.00221405	0.236318	40424	-0.83352	0.382609	4.74594	5.06139	0.0244646	4.80361	-0.540676	0.374031	2.08958	2.19345	2.09931
rs10124513	17350983		C	G	0.621047	0.622853	0.85829	40424	0.0437162	0.0194478	5.05292	5.06099	0.0244703	5.05362	0.0345501	0.0185335	3.47522	3.48047	3.47552
rs6475143	17351711		A	G	0.621055	0.622858	0.858306	40424	0.0437151	0.019448	5.05256	5.06063	0.0244753	5.05326	0.0345409	0.0185337	3.47329	3.47853	3.47359
rs10963057	17349497		A	G	0.621038	0.622846	0.858272	40424	0.0437122	0.0194475	5.05215	5.06021	0.0244813	5.05284	0.0345582	0.0185333	3.47696	3.48221	3.47725
rs77962191	16684383		T	C	0.0240285	0.0218857	0.554164	40424	-0.18083	0.0813137	4.94555	5.05751	0.0245194	4.95221	-0.194577	0.0769225	6.39849	6.58783	6.41171
rs56356837	16908104		A	ACAT	0.0825126	0.079717	0.961121	40424	-0.0725432	0.032398	5.01369	5.05618	0.0245383	5.0157	-0.0737186	0.0310533	5.63557	5.6972	5.638
rs1583987	17367368		T	C	0.620678	0.622403	0.859074	40424	0.0436565	0.0194308	5.04794	5.05597	0.0245412	5.04864	0.0344613	0.0185175	3.46338	3.46858	3.46368
rs79575950	16483455		A	G	0.055871	0.0581498	0.884231	40424	0.0911085	0.0403344	5.10231	5.05404	0.0245686	5.10491	0.0560053	0.0382074	2.14864	2.13225	2.14911
rs4961540	17345817		T	C	0.620959	0.62278	0.857973	40424	0.0436801	0.0194456	5.04573	5.05377	0.0245724	5.04643	0.0345983	0.0185313	3.48576	3.49103	3.48606
rs7851890	17347722		T	C	0.62059	0.622333	0.85844	40424	0.0436573	0.0194422	5.04223	5.05025	0.0246224	5.04292	0.0343652	0.018528	3.44018	3.44533	3.44047
rs6475142	17350631		G	A	0.620996	0.622789	0.858148	40424	0.0436606	0.0194488	5.03955	5.04759	0.0246602	5.04025	0.0344942	0.0185343	3.46368	3.4689	3.46398
rs10119370	17346404		A	G	0.621132	0.622946	0.857955	40424	0.0436617	0.0194497	5.03937	5.0474	0.0246629	5.04006	0.0345492	0.0185354	3.47433	3.47958	3.47463
rs10116428	17346156		T	C	0.621001	0.622807	0.857967	40424	0.0436454	0.0194469	5.03702	5.04504	0.0246965	5.03771	0.0345438	0.0185328	3.47424	3.47948	3.47454
rs10119297	17346147		A	G	0.621	0.622806	0.857964	40424	0.0436449	0.0194469	5.03693	5.04495	0.0246978	5.03762	0.0345447	0.0185327	3.47443	3.47967	3.47473
rs10962939	17247143		T	C	0.139427	0.1346	0.932124	40424	-0.0589837	0.0263386	5.01508	5.0447	0.0247014	5.01634	-0.066547	0.0251748	6.98753	7.04569	6.98988
rs7869727	17348552		G	T	0.621189	0.622989	0.858089	40424	0.0436519	0.0194511	5.03636	5.0444	0.0247057	5.03705	0.0345063	0.018537	3.46514	3.47037	3.46544
rs3861711	17367325		C	A	0.619692	0.621308	0.859683	40424	0.0435677	0.0194136	5.03635	5.04429	0.0247072	5.03704	0.0341246	0.0185009	3.40214	3.40715	3.40242
rs7035386	17246443		G	T	0.138451	0.133513	0.936008	40424	-0.0590575	0.0263743	5.01403	5.04374	0.0247151	5.01529	-0.0671478	0.0252083	7.0954	7.15514	7.09783
rs10962476	16531045		A	T	0.150129	0.146513	0.501967	40424	-0.079088	0.0353736	4.99877	5.03335	0.0248638	5.00029	-0.0778208	0.0333342	5.45019	5.49184	5.45172
rs7037959	16805054		C	T	0.00889368	0.0101194	0.282757	40424	0.376366	0.165646	5.16252	5.0332	0.0248659	5.17861	0.321172	0.156136	4.23128	4.12565	4.24401
rs72718111	16985589		A	C	0.259963	0.266582	0.951533	40424	0.0454561	0.0202433	5.0422	5.02881	0.024929	5.04302	0.0406286	0.0193325	4.41658	4.40282	4.41717
rs10810765	17341670		A	G	0.378508	0.376604	0.857201	40424	-0.0436188	0.019467	5.02052	5.02851	0.0249333	5.02121	-0.034569	0.0185526	3.47189	3.47714	3.47219
rs4961543	17357709		G	T	0.621211	0.622993	0.858793	40424	0.0435623	0.0194461	5.0183	5.02629	0.0249653	5.01899	0.0345834	0.0185315	3.48267	3.48795	3.48297
rs9695844	17357914		C	T	0.621211	0.622993	0.858792	40424	0.0435622	0.0194461	5.01829	5.02628	0.0249655	5.01897	0.0345829	0.0185315	3.48256	3.48784	3.48286
rs34806014	17357265		G	GT	0.621211	0.622992	0.858795	40424	0.0435608	0.0194461	5.01797	5.02597	0.0249699	5.01866	0.0345818	0.0185315	3.48237	3.48764	3.48267
rs10810774	17356925		T	C	0.621211	0.622992	0.858796	40424	0.0435605	0.019446	5.01792	5.02591	0.0249708	5.0186	0.0345814	0.0185315	3.48229	3.48756	3.48259
rs10810775	17356999		C	T	0.621211	0.622992	0.858796	40424	0.0435601	0.019446	5.01782	5.02581	0.0249722	5.01851	0.034581	0.0185315	3.48221	3.48748	3.48251
rs4961542	17357212		T	C	0.621211	0.622992	0.858795	40424	0.04356	0.0194461	5.0178	5.02579	0.0249725	5.01849	0.034581	0.0185315	3.4822	3.48747	3.4825
rs1856132	16730653		A	G	0.06795	0.0710989	0.729879	40424	0.0903847	0.0401392	5.07053	5.02513	0.0249821	5.07296	0.0585013	0.0380491	2.36397	2.34659	2.36449
rs10756875	17356550		G	A	0.62125	0.623035	0.85864	40424	0.0435379	0.0194485	5.01145	5.01942	0.0250646	5.01213	0.0345653	0.0185337	3.47821	3.48347	3.47851
rs7854802	17339793		G	A	0.622029	0.62377	0.856918	40424	0.0435727	0.0194649	5.01097	5.01903	0.0250702	5.01166	0.0344129	0.0185485	3.4421	3.44734	3.4424
rs12552675	16903240		C	T	0.0809436	0.0781365	0.950465	40424	-0.073477	0.032949	4.97299	5.01521	0.0251256	4.97501	-0.0737908	0.031577	5.46086	5.52004	5.46317
rs7871926	17354045		C	A	0.621241	0.623025	0.856903	40424	0.0435572	0.0194687	5.00548	5.01344	0.0251513	5.00617	0.0345227	0.0185525	3.4626	3.46783	3.4629
rs10123745	17365351		T	C	0.621153	0.622922	0.859529	40424	0.0434684	0.0194304	5.00476	5.0127	0.025162	5.00544	0.0341035	0.0185159	3.3924	3.39746	3.39268
rs4961544	17358066		G	A	0.621221	0.622995	0.858776	40424	0.0435005	0.0194463	5.00399	5.01195	0.0251729	5.00468	0.0345459	0.0185317	3.47506	3.48032	3.47536
rs10756877	17365022		C	A	0.621007	0.622733	0.85885	40424	0.0434735	0.019438	5.00201	5.00994	0.0252022	5.00269	0.0343752	0.0185241	3.44362	3.44878	3.44391
rs10738476	17364950		G	A	0.621007	0.622733	0.85885	40424	0.0434732	0.019438	5.00194	5.00987	0.0252032	5.00263	0.034375	0.0185241	3.44358	3.44875	3.44388
rs7848980	17364507		T	C	0.621007	0.622732	0.858851	40424	0.0434718	0.019438	5.00165	5.00957	0.0252076	5.00233	0.0343736	0.0185241	3.44331	3.44848	3.4436
rs186038477	16878020		A	G	0.00354197	0.0038531	0.407773	40424	0.513452	0.22413	5.24805	5.00815	0.0252283	5.28459	0.282212	0.208176	1.83777	1.78254	1.84367
rs79556229	16482641		G	A	0.0539227	0.056231	0.903644	40424	0.0910699	0.0405128	5.05319	5.00506	0.0252733	5.05581	0.0581897	0.0383929	2.29715	2.27882	2.2977
rs1372702	17362180		C	A	0.621024	0.622747	0.858862	40424	0.04345	0.0194379	4.99665	5.00457	0.0252805	4.99733	0.034355	0.0185241	3.43959	3.44475	3.43989
rs7470216	17266125		A	T	0.206281	0.206004	0.515772	40424	-0.0674114	0.0301932	4.9848	5.00248	0.025311	4.98569	-0.0413801	0.0288484	2.0575	2.063	2.05764
rs183796202	16896738		T	C	0.000954615	0.00073294	0.160078	40424	-1.80485	0.856166	4.44394	5.00228	0.025314	4.55757	-1.4674	0.826811	3.14979	3.50771	3.19199
rs2099858	17366932		C	G	0.620842	0.622543	0.858931	40424	0.043429	0.0194348	4.99343	5.00132	0.025328	4.9941	0.034306	0.0185212	3.43084	3.43597	3.43113
rs7028593	17320881		A	G	0.622158	0.62396	0.858446	40424	0.0434351	0.0194418	4.99126	4.99926	0.0253582	4.99194	0.0340749	0.0185258	3.38311	3.3882	3.38339
rs200979140	17192151		GTATT	G	0.0203706	0.017785	0.792399	40424	-0.161512	0.0730148	4.89316	4.99802	0.0253763	4.90066	-0.150401	0.0699672	4.62077	4.73556	4.62746
rs10756866	17325675		G	C	0.622343	0.624169	0.858338	40424	0.0434266	0.0194455	4.9874	4.9954	0.0254148	4.98808	0.0341596	0.0185293	3.39864	3.40377	3.39892
rs10756867	17325704		C	G	0.622343	0.624169	0.858338	40424	0.0434259	0.0194455	4.98723	4.99524	0.0254171	4.98791	0.0341591	0.0185294	3.39854	3.40367	3.39882
rs12344698	16750143		C	T	0.0696754	0.0732455	0.730439	40424	0.0887574	0.0395437	5.03797	4.99424	0.0254318	5.04032	0.0613065	0.0375226	2.66948	2.64911	2.67013
rs4246135	17327271		G	A	0.621289	0.622986	0.858021	40424	0.0434052	0.0194409	4.98483	4.99277	0.0254534	4.98551	0.0341636	0.0185252	3.40099	3.40609	3.40127
rs114983125	16823678		T	C	0.0612912	0.0642993	0.553985	40424	0.108577	0.0483664	5.03947	4.99003	0.0254938	5.04233	0.0686467	0.0457699	2.24946	2.23158	2.25003
rs10810756	17324268		C	T	0.622386	0.62421	0.858401	40424	0.0434021	0.0194453	4.98188	4.98987	0.0254961	4.98255	0.0341447	0.0185291	3.39575	3.40088	3.39604
rs139091863	16845121		C	G	0.00216743	0.00198216	0.192811	40424	-0.969186	0.447275	4.69532	4.98587	0.0255551	4.75114	-0.568976	0.435674	1.70555	1.77452	1.7112
rs12378588	16788274		A	G	0.0823966	0.0861622	0.726993	40424	0.0823305	0.0367487	5.01922	4.98022	0.0256387	5.02124	0.0611162	0.0349111	3.06468	3.04201	3.0654
rs10810764	17339718		G	A	0.621026	0.622646	0.85783	40424	0.0433338	0.0194447	4.96652	4.97441	0.025725	4.96719	0.0340005	0.0185289	3.3672	3.37222	3.36748
rs12337154	17318434		G	C	0.623345	0.625275	0.858956	40424	0.0433319	0.0194447	4.96609	4.97408	0.0257299	4.96676	0.0344771	0.0185292	3.46216	3.46748	3.46246
rs188299490	16778685		G	A	0.00273599	0.00208916	0.353128	40424	-0.717074	0.334741	4.58892	4.97269	0.0257506	4.65046	-0.78275	0.321838	5.91522	6.55925	6.01614
rs9298774	17321574		C	T	0.62216	0.623957	0.8586	40424	0.043306	0.0194405	4.96229	4.97022	0.0257874	4.96296	0.034016	0.0185245	3.37189	3.37696	3.37217
rs35066453	16848716		A	G	0.0717789	0.0681432	0.987715	40424	-0.0765916	0.0345161	4.92401	4.96977	0.0257941	4.92617	-0.0730269	0.0330752	4.87484	4.92937	4.87691
rs7044823	17320792		T	C	0.623028	0.624912	0.858024	40424	0.0433364	0.0194553	4.96168	4.96965	0.0257959	4.96235	0.0342254	0.0185391	3.40818	3.41337	3.40847
rs7028930	17320822		G	C	0.623029	0.624912	0.858025	40424	0.0433354	0.0194553	4.96146	4.96944	0.025799	4.96214	0.0342245	0.0185391	3.40799	3.41318	3.40828
rs3824391	17340383		G	A	0.621894	0.623598	0.857233	40424	0.0433345	0.0194601	4.95883	4.96675	0.0258392	4.95951	0.0341932	0.018544	3.39995	3.40508	3.40024
rs10125333	17321670		C	T	0.62303	0.624911	0.858027	40424	0.0433233	0.0194554	4.95863	4.9666	0.0258414	4.9593	0.0342156	0.0185391	3.40619	3.41137	3.40647
rs7038197	17338464		T	C	0.622216	0.623999	0.857866	40424	0.0433212	0.0194552	4.95826	4.96618	0.0258477	4.95893	0.0343893	0.0185392	3.44083	3.44606	3.44112
rs7022024	17338410		G	A	0.622215	0.623996	0.857869	40424	0.0433115	0.0194552	4.95606	4.96399	0.0258804	4.95673	0.0343765	0.0185392	3.4383	3.44352	3.43859
rs9298775	17334526		G	A	0.621984	0.623723	0.858188	40424	0.0432917	0.019448	4.95516	4.96307	0.0258942	4.95583	0.0341765	0.0185321	3.40099	3.40612	3.40128
rs7870101	17339839		T	C	0.622109	0.623791	0.856517	40424	0.0433404	0.019471	4.95462	4.96253	0.0259023	4.95529	0.0341286	0.0185552	3.38302	3.38811	3.3833
rs114425667	16554076		C	T	0.020694	0.0222687	0.546266	40424	0.181941	0.0809754	5.04844	4.96204	0.0259096	5.05632	0.134422	0.0763291	3.10143	3.05155	3.10448
rs4961548	17366568		A	T	0.621642	0.623425	0.856271	40424	0.0433145	0.0194703	4.94906	4.95695	0.025986	4.94973	0.0346995	0.0185565	3.49666	3.50202	3.49696
rs56719605	17266163		T	G	0.0750814	0.0712607	0.645757	40424	-0.0932644	0.0420845	4.91119	4.95099	0.0260757	4.91296	-0.104666	0.0402925	6.74783	6.82477	6.75103
rs9802710	17263439		T	G	0.399286	0.39964	0.811815	40424	-0.0438366	0.0197414	4.93081	4.93714	0.0262855	4.93146	-0.0294761	0.018813	2.45484	2.45726	2.45499
rs7860105	16691263		C	T	0.940935	0.936673	0.71979	40424	-0.095282	0.0426983	4.97966	4.9331	0.026347	4.98212	-0.0950077	0.0404607	5.51379	5.4492	5.51689
rs3824392	17340377		A	G	0.621904	0.623581	0.857268	40424	0.043167	0.0194581	4.92157	4.92939	0.0264036	4.92223	0.0340896	0.0185429	3.37979	3.38488	3.38008
rs10963042	17338186		G	C	0.622063	0.623829	0.857358	40424	0.043166	0.0194586	4.92107	4.9289	0.0264111	4.92173	0.0343219	0.0185431	3.42591	3.43111	3.4262
rs263633	17001216		A	C	0.643397	0.647941	0.988839	40424	0.0407318	0.0183656	4.91878	4.92748	0.0264328	4.91944	0.0366965	0.0175402	4.37702	4.38558	4.3775
rs9298772	17319956		C	A	0.623179	0.625047	0.858594	40424	0.0431404	0.0194513	4.91894	4.92681	0.0264431	4.9196	0.0342763	0.0185353	3.4197	3.42492	3.41999
rs263632	17001291		T	C	0.643808	0.648385	0.987158	40424	0.0407594	0.018382	4.91665	4.92538	0.026465	4.91731	0.0368276	0.0175563	4.40031	4.40898	4.4008
rs4246136	17335585		A	G	0.62217	0.623905	0.858063	40424	0.0431364	0.0194527	4.91731	4.92513	0.0264688	4.91797	0.0341052	0.0185364	3.38525	3.39036	3.38554
rs4961539	17336338		C	G	0.621296	0.622932	0.858622	40424	0.0430689	0.0194375	4.9096	4.91735	0.0265883	4.91025	0.0338566	0.0185217	3.34138	3.34635	3.34166
rs10810763	17336360		G	A	0.622158	0.623882	0.858044	40424	0.0430997	0.0194525	4.90905	4.91685	0.026596	4.90971	0.0340728	0.0185364	3.37883	3.38392	3.37911
rs11404854	17331361		A	AT	0.622209	0.623931	0.858056	40424	0.0430956	0.019453	4.90785	4.91565	0.0266144	4.9085	0.0340524	0.0185368	3.37462	3.3797	3.3749
rs3780258	17331927		G	A	0.621299	0.62293	0.858638	40424	0.0430557	0.0194375	4.90661	4.91436	0.0266343	4.90727	0.0338281	0.0185216	3.33578	3.34073	3.33606
rs3765040	17330558		T	A	0.622148	0.623863	0.858091	40424	0.0430606	0.0194517	4.90052	4.9083	0.0267279	4.90118	0.0340176	0.0185356	3.36816	3.37323	3.36844
rs10046851	17334801		G	A	0.622152	0.623866	0.858079	40424	0.0430606	0.0194519	4.90043	4.90821	0.0267293	4.90108	0.034019	0.0185358	3.36837	3.37343	3.36865
rs10123715	17335125		T	C	0.622152	0.623866	0.858078	40424	0.0430604	0.019452	4.90038	4.90816	0.0267301	4.90103	0.0340199	0.0185358	3.36853	3.3736	3.36881
rs10481559	17335480		A	C	0.622152	0.623867	0.858077	40424	0.0430604	0.019452	4.90036	4.90814	0.0267304	4.90102	0.0340206	0.0185359	3.36868	3.37374	3.36896
rs7854724	17339879		C	T	0.622575	0.624174	0.854362	40424	0.0431582	0.0194971	4.89988	4.90765	0.026738	4.90053	0.0338528	0.0185818	3.31904	3.32398	3.31931
rs3808784	17333543		A	G	0.622151	0.623863	0.858084	40424	0.0430524	0.0194519	4.8986	4.90638	0.0267577	4.89926	0.0340091	0.0185357	3.36644	3.3715	3.36672
rs7031133	17333453		G	A	0.622151	0.623863	0.858084	40424	0.043052	0.0194519	4.8985	4.90628	0.0267592	4.89915	0.0340088	0.0185357	3.36637	3.37143	3.36665
rs7019267	16869168		T	C	0.0667617	0.0627089	0.986748	40424	-0.079032	0.0358614	4.85682	4.90434	0.0267893	4.85909	-0.082853	0.0343547	5.81626	5.89158	5.81942
rs78077756	16441931		C	T	0.0481794	0.0506224	0.886823	40424	0.0953161	0.0428242	4.95398	4.9041	0.026793	4.95686	0.0731508	0.0406485	3.23854	3.20579	3.23977
rs7044462	17336882		C	T	0.621159	0.622802	0.858035	40424	0.0430115	0.019442	4.89425	4.90196	0.0268262	4.8949	0.033926	0.0185267	3.35326	3.35826	3.35354
rs12683636	16862691		T	C	0.0664302	0.0623799	0.999823	40424	-0.078786	0.0357619	4.8535	4.90114	0.026839	4.85576	-0.0826921	0.0342232	5.83831	5.91407	5.8415
rs144050346	17264935		G	T	0.32885	0.326165	0.710151	40424	-0.0489335	0.022132	4.88846	4.89803	0.0268874	4.88915	-0.0377892	0.0210871	3.21145	3.21727	3.21172
rs141935679	16740061		T	G	0.000357981	0.000501926	0.266734	40424	1.75915	0.752649	5.46285	4.89079	0.0270003	5.87398	1.16236	0.720226	2.60461	2.42956	2.70804
c9_pos16974590	16984590		G	C	0.26029	0.267127	0.97131	40424	0.044425	0.0200684	4.90037	4.88781	0.027047	4.90113	0.0407018	0.0191662	4.50977	4.49589	4.51037
rs10114083	17373948		T	C	0.621316	0.623074	0.851469	40424	0.0431763	0.0195449	4.88002	4.88767	0.0270492	4.88067	0.0343311	0.0186198	3.3996	3.4047	3.39989
rs188221341	16670513		G	T	0.00109421	0.000956286	0.113035	40424	-1.96921	0.956793	4.23593	4.88405	0.0271059	4.33056	-1.59782	0.927334	2.96882	3.37359	2.98266
rs116961835	16747054		T	G	0.010284	0.0115595	0.516557	40424	0.254994	0.114086	4.99569	4.88326	0.0271184	5.01089	0.312966	0.108182	8.36926	8.07241	8.41174
rs141284438	17203725		T	G	0.00448236	0.00546904	0.420163	40424	0.411408	0.183556	5.02355	4.88287	0.0271245	5.05574	0.414871	0.174933	5.62447	5.41036	5.66586
rs200119742	16801742		AC	A	0.0891629	0.093657	0.697645	40424	0.0802731	0.0361998	4.91731	4.88228	0.0271338	4.91902	0.0623424	0.0343839	3.28744	3.2645	3.28818
rs1416745	16911091		C	G	0.0823824	0.0794579	0.986921	40424	-0.0708864	0.0322285	4.83777	4.87775	0.0272051	4.83963	-0.072785	0.0308885	5.55254	5.61245	5.55488
rs1339549	16864572		T	A	0.0676834	0.0639566	0.996466	40424	-0.0778673	0.0354324	4.82958	4.87591	0.0272341	4.83177	-0.0790339	0.0339185	5.42942	5.49601	5.43212
rs141712847	17151553		G	C	0.00103116	0.00122896	0.117198	40424	1.67047	0.738829	5.11199	4.87185	0.0272982	5.17638	1.3508	0.687342	3.86222	3.69777	3.90964
rs7848397	17373070		G	A	0.620888	0.622682	0.85155	40424	0.0430528	0.0195391	4.85507	4.86261	0.0274448	4.85571	0.0343873	0.0186147	3.41257	3.41767	3.41286
rs72717031	16491852		T	C	0.0387955	0.0368064	0.448127	40424	-0.153186	0.0700606	4.78072	4.85866	0.0275077	4.78514	-0.135843	0.0665257	4.16962	4.24076	4.17296
rs7030452	17363286		A	G	0.622211	0.623825	0.857543	40424	0.0428639	0.0194634	4.85003	4.85766	0.0275236	4.85067	0.0336948	0.0185491	3.29976	3.30465	3.30003
rs10119811	16799844		C	T	0.0748862	0.0781401	0.782816	40424	0.0820337	0.0370784	4.89488	4.85715	0.0275318	4.89678	0.052892	0.0352377	2.25302	2.23865	2.25341
rs7046884	16476144		G	A	0.071432	0.0741401	0.83644	40424	0.0816612	0.036908	4.89542	4.85526	0.027562	4.89746	0.0571065	0.0349953	2.66288	2.64296	2.66348
rs111644895	17208077		C	G	0.0235161	0.0196705	0.776533	40424	-0.153537	0.0704319	4.75209	4.84916	0.0276596	4.75857	-0.174894	0.067277	6.75801	6.9554	6.77093
rs188251867	16946136		G	A	0.00995582	0.0108164	0.783579	40424	0.216698	0.0973112	4.95887	4.84536	0.0277206	4.97175	0.135616	0.0918654	2.1793	2.13753	2.18184
rs7858530	17354396		T	C	0.616611	0.618389	0.848083	40424	0.0429088	0.0195101	4.83696	4.84432	0.0277373	4.8376	0.0342555	0.0185968	3.39298	3.39792	3.39327
rs7041840	17399095		T	G	0.598122	0.598768	0.848234	40424	0.0425175	0.0193557	4.82521	4.83148	0.0279446	4.82583	0.032986	0.0184458	3.1979	3.20169	3.19815
rs192796067	17076471		G	A	0.00269825	0.00197454	0.561668	40424	-0.557034	0.263802	4.45869	4.83086	0.0279547	4.52727	-0.640661	0.256856	6.22123	6.94609	6.34417
rs7855044	16758505		T	C	0.0682375	0.0714243	0.713835	40424	0.0892107	0.0404323	4.86829	4.8262	0.0280303	4.87051	0.0617602	0.0383608	2.59205	2.57224	2.59266
rs199542150	16862359		C	CT	0.0643764	0.0605783	0.964945	40424	-0.0805418	0.0368505	4.777	4.82403	0.0280657	4.77922	-0.0830806	0.0352726	5.54783	5.61876	5.55076
rs80093082	16482104		G	A	0.0537208	0.0559551	0.908703	40424	0.0893383	0.0404852	4.86949	4.82387	0.0280683	4.87193	0.0567989	0.0383682	2.19148	2.17437	2.19198
rs12002778	16866661		A	T	0.214332	0.213575	0.99925	28728	-0.0545099	0.0248758	4.80173	4.8226	0.0280889	4.80289	-0.0512963	0.0239155	4.60058	4.62438	4.60156
rs10810621	16776500		A	C	0.220985	0.232505	0.869869	40424	0.0491337	0.0223396	4.83733	4.82231	0.0280937	4.83815	0.0403802	0.0212971	3.59497	3.5831	3.59539
rs10810600	16734676		T	C	0.0669714	0.0701465	0.722577	40424	0.0893784	0.0405654	4.85459	4.81206	0.0282612	4.85683	0.0609444	0.0384697	2.50975	2.4907	2.51033
rs138823739	16819597		G	A	0.00405709	0.00506398	0.714263	40424	0.332332	0.149377	4.94967	4.80676	0.0283483	4.97845	0.365638	0.141241	6.70162	6.41356	6.75431
rs75179897	16481630		C	T	0.0537026	0.0559378	0.91017	40424	0.089094	0.0404585	4.84928	4.80393	0.0283949	4.8517	0.0567913	0.0383424	2.19383	2.17669	2.19434
rs151205917	16925970		G	A	0.0160146	0.0177162	0.340894	40424	0.251458	0.113838	4.8793	4.80079	0.0284467	4.88788	0.265466	0.108182	6.02156	5.88632	6.03401
rs78186258	16480058		A	G	0.0541527	0.0564214	0.907839	40424	0.0887826	0.0403413	4.84345	4.79832	0.0284875	4.84585	0.0575927	0.0382346	2.26893	2.25097	2.26947
rs7874453	17372960		C	T	0.620582	0.622261	0.852237	40424	0.0427187	0.0195269	4.78595	4.7933	0.0285706	4.78658	0.0339157	0.0186031	3.32379	3.32866	3.32406
rs12555917	16491931		C	T	0.0387612	0.0367799	0.448227	40424	-0.152175	0.0700749	4.7159	4.79222	0.0285886	4.72019	-0.13541	0.0665373	4.14164	4.21205	4.14494
rs55763764	16833127		A	T	0.254115	0.265443	0.653465	40424	0.0539158	0.024603	4.80237	4.78947	0.0286342	4.80314	0.0521438	0.0233803	4.97398	4.95824	4.97472
rs4961553	17369684		A	G	0.621759	0.623396	0.854969	40424	0.0425576	0.0195024	4.76187	4.76922	0.0289729	4.76249	0.0338656	0.0185801	3.32218	3.32708	3.32245
rs115592788	16553972		G	C	0.0210666	0.0226613	0.564207	40424	0.173961	0.0789926	4.84986	4.76874	0.028981	4.85705	0.128441	0.0744812	2.97381	2.92726	2.97659
rs7864296	17176791		G	A	0.155339	0.14935	0.904428	40424	-0.0557733	0.0256369	4.73286	4.75836	0.0291563	4.7339	-0.0640153	0.0244366	6.86255	6.91585	6.86466
rs10123172	16701082		A	G	0.958139	0.955547	0.736009	40424	-0.109212	0.0498408	4.80144	4.74864	0.0293215	4.80437	-0.102743	0.0471393	4.75047	4.68813	4.75357
rs452158	16998232		C	T	0.642702	0.647076	0.999982	40424	0.0399038	0.0183286	4.7399	4.74812	0.0293303	4.74052	0.0357904	0.0175042	4.18069	4.18866	4.18113
rs61177185	16514497		T	TA	0.0163059	0.0146074	0.402974	40424	-0.252073	0.117496	4.60266	4.73943	0.0294788	4.61422	-0.299161	0.111123	7.24774	7.55494	7.27575
rs76655031	16681021		C	T	0.00587162	0.00634274	0.180251	40424	0.57471	0.260626	4.86252	4.72814	0.029673	4.89607	0.339501	0.245298	1.91555	1.868	1.92031
rs10756832	16897215		G	T	0.957059	0.959137	0.881634	40424	0.100246	0.0464131	4.66502	4.72596	0.0297106	4.66849	0.105543	0.0445363	5.61609	5.71205	5.62094
rs71513271	16870472		A	G	0.084733	0.0824769	0.93756	40424	-0.0698335	0.0322559	4.68714	4.72477	0.0297312	4.68886	-0.0650985	0.0308953	4.43974	4.48176	4.44121
rs201116317	16897213		TTG	T	0.956826	0.95893	0.88044	40424	0.0996079	0.0461693	4.65459	4.7152	0.0298971	4.65803	0.105297	0.0443033	5.64888	5.74555	5.65377
rs187485670	16919364		C	T	0.00383847	0.00447007	0.295073	40424	0.531476	0.241812	4.83073	4.70929	0.03	4.85748	0.641894	0.22833	7.90315	7.58333	7.97813
rs1113379	17315352		T	G	0.862298	0.866917	0.929955	40424	0.0571901	0.0264332	4.68105	4.70786	0.030025	4.68215	0.0645512	0.0252651	6.52781	6.58053	6.52986
rs12379102	17372209		G	C	0.621312	0.623052	0.852467	40424	0.0423421	0.0195305	4.70023	4.70743	0.0300325	4.70083	0.0338928	0.0186075	3.3177	3.3226	3.31797
rs10963028	17317501		C	G	0.861576	0.866099	0.918874	40424	0.0573573	0.0265143	4.67968	4.70652	0.0300484	4.68078	0.0643873	0.0253399	6.45643	6.50836	6.45845
rs77257470	16479560		C	T	0.0537294	0.0559898	0.91364	40424	0.0879649	0.0403612	4.74996	4.70601	0.0300573	4.75228	0.0571777	0.0382503	2.23452	2.21692	2.23504
rs10962547	16712247		T	A	0.169481	0.17763	0.606283	40424	0.0646456	0.0297353	4.72642	4.7051	0.0300733	4.72749	0.0567584	0.028199	4.05127	4.03072	4.05198
rs10116140	17390339		C	T	0.597643	0.598085	0.847918	40424	0.041929	0.0193476	4.69652	4.70247	0.0301193	4.69711	0.032298	0.0184369	3.06885	3.07237	3.06908
rs78729437	16557868		T	G	0.0285052	0.0272139	0.381815	40424	-0.191822	0.0894072	4.60313	4.69995	0.0301635	4.6093	-0.152777	0.0840496	3.30402	3.36859	3.30722
rs10756861	17310426		A	G	0.862535	0.867155	0.92882	40424	0.0572017	0.026474	4.66853	4.6952	0.030247	4.66962	0.0645987	0.0253047	6.51695	6.56949	6.519
rs201931546	16897214		TG	T	0.957124	0.959197	0.882765	40424	0.0999163	0.0464144	4.63411	4.69445	0.0302602	4.63753	0.10538	0.0445384	5.59823	5.69375	5.60305
rs1930645	17311004		T	C	0.862536	0.867156	0.928775	40424	0.0571974	0.0264745	4.66763	4.6943	0.0302628	4.66873	0.0645975	0.0253052	6.51644	6.56898	6.51849
rs7047070	16895254		C	T	0.037179	0.0347095	0.986458	40424	-0.101674	0.0472583	4.62874	4.69142	0.0303136	4.63238	-0.111633	0.0453949	6.04747	6.15922	6.05347
rs187412310	16771982		G	T	0.000441719	0.000611313	0.120667	40424	2.23856	1.0166	4.84883	4.69056	0.0303288	5.00388	2.84518	0.971215	8.58203	8.03725	9.03409
rs13289064	16897685		G	C	0.0808158	0.0783286	0.99182	40424	-0.0698452	0.0323866	4.65095	4.68871	0.0303614	4.65268	-0.0673405	0.0310414	4.70619	4.75302	4.70789
rs943748	16567095		A	G	0.0254507	0.0238155	0.407885	40424	-0.196862	0.0919655	4.58218	4.68527	0.0304223	4.58902	-0.169394	0.086648	3.82189	3.90911	3.82676
rs200086882	17184318		C	CAT	0.154096	0.148055	0.915377	40424	-0.0551338	0.0255554	4.65448	4.67932	0.0305278	4.65548	-0.0644304	0.0243635	6.99364	7.04852	6.99583
rs10962556	16736003		G	A	0.0660418	0.0691387	0.722556	40424	0.0886579	0.0408184	4.71761	4.6766	0.0305762	4.71974	0.0599416	0.0387236	2.3961	2.3782	2.39664
rs7018523	17267069		G	T	0.120777	0.115887	0.916145	40424	-0.0611391	0.0283663	4.64552	4.67452	0.0306133	4.6467	-0.0717609	0.0270972	7.01337	7.0777	7.01601
rs185606154	16511540		C	G	0.00282874	0.00242578	0.20221	40424	-0.895008	0.431075	4.31071	4.67156	0.0306661	4.3578	-0.831188	0.403781	4.23747	4.61263	4.28559
rs1442523	17391536		A	G	0.597049	0.597429	0.844901	40424	0.0418372	0.0193817	4.6595	4.66538	0.0307766	4.66008	0.0321392	0.018469	3.0282	3.03164	3.02842
rs182899266	16831918		A	G	0.00289976	0.00316664	0.469406	40424	0.508938	0.22936	4.92374	4.66514	0.0307809	4.95849	0.227565	0.214647	1.12398	1.09508	1.12657
rs186027108	16876737		T	C	0.00107702	0.000687812	0.460283	40424	-1.0278	0.518427	3.93042	4.65723	0.030923	4.1175	-1.04094	0.517917	4.03953	4.90918	4.22898
rs183877541	17370495		T	C	0.000522994	0.000391861	0.138144	40424	-2.88911	1.47502	3.83644	4.65576	0.0309495	3.78461	-2.84771	1.39924	4.14198	5.12625	4.15995
rs183918523	16660343		T	C	0.0016463	0.00203314	0.245298	40424	0.855974	0.387027	4.89147	4.65373	0.0309861	4.98845	0.779768	0.366314	4.53131	4.29664	4.62885
rs61590865	16517699		G	T	0.00572865	0.00529502	0.173852	40424	-0.629443	0.297577	4.47419	4.65037	0.0310469	4.49035	-0.517254	0.279577	3.42298	3.54937	3.4341
rs4961729	16676601		A	G	0.232983	0.243225	0.706091	40424	0.0525686	0.0243422	4.6637	4.65017	0.0310505	4.66444	0.0517973	0.023112	5.02274	5.00564	5.02351
rs10962569	16759197		C	G	0.0683882	0.0715679	0.715824	40424	0.087292	0.0403334	4.68402	4.64445	0.0311541	4.68607	0.0611324	0.0382709	2.55156	2.53228	2.55215
rs200119813	17357600		C	CAT	0.604569	0.606166	0.81596	40424	0.0426482	0.0198063	4.63653	4.64313	0.0311781	4.63712	0.0342215	0.0188731	3.28785	3.29236	3.28812
rs10962669	16896462		G	A	0.0369872	0.0345286	0.98518	40424	-0.101466	0.0474117	4.58008	4.64186	0.0312012	4.58365	-0.111804	0.0455407	6.02719	6.13852	6.03317
rs10122827	16774627		T	C	0.0727496	0.0759359	0.773585	40424	0.0815436	0.037698	4.6789	4.64146	0.0312084	4.68081	0.0583481	0.0358217	2.65314	2.63361	2.65373
rs34097600	16915716		G	T	0.0804707	0.0778161	0.923199	40424	-0.0715802	0.0333791	4.59871	4.63629	0.0313026	4.60045	-0.0739486	0.0320044	5.33875	5.39629	5.34097
rs188781753	17321741		T	C	0.00410268	0.00458377	0.173442	40424	0.678325	0.311005	4.75708	4.63324	0.0313583	4.78886	0.749063	0.291389	6.6083	6.34442	6.66274
rs263547	17026929		G	A	0.201731	0.191388	0.9877	40424	-0.0474101	0.0220811	4.61	4.62906	0.0314348	4.61083	-0.0552577	0.0211116	6.85084	6.89262	6.85256
rs10756879	17397381		G	T	0.909201	0.914835	0.906334	40424	0.0697304	0.0325555	4.58769	4.62517	0.0315061	4.58929	0.0787727	0.0310567	6.43342	6.50782	6.43653
rs185547663	17198653		T	C	0.000561399	0.000452904	0.110219	40424	-2.66462	1.30793	4.15055	4.61863	0.0316265	4.24905	-3.08852	1.29575	5.68141	6.53206	5.83154
rs4961435	17357597		C	A	0.604821	0.606425	0.816267	40424	0.0425224	0.019804	4.6103	4.61685	0.0316593	4.61087	0.034181	0.018871	3.28079	3.28529	3.28105
rs139736769	16781459		G	A	0.0696291	0.0726713	0.790825	40424	0.0822249	0.0381123	4.65455	4.61682	0.0316599	4.65649	0.0583313	0.0362089	2.59522	2.57598	2.5958
rs6475141	17350378		A	C	0.623451	0.62498	0.851501	40424	0.0419645	0.0195522	4.6065	4.61355	0.0317203	4.60707	0.0328901	0.01863	3.11678	3.12126	3.11702
rs10116093	17390170		C	T	0.59821	0.598623	0.847238	40424	0.0415593	0.0193627	4.60686	4.61266	0.0317368	4.60743	0.0320045	0.0184512	3.00864	3.01207	3.00886
rs11523728	17266138		G	A	0.0055325	0.00450044	0.389992	40424	-0.439741	0.209178	4.41938	4.6126	0.0317379	4.43831	-0.483174	0.199091	5.88985	6.22495	5.92567
rs28704646	16480626		G	C	0.0546123	0.0569032	0.921806	40424	0.086028	0.039875	4.65455	4.61232	0.0317431	4.65675	0.0552243	0.037798	2.13463	2.11833	2.1351
rs2254468	16804197		A	G	0.0653971	0.0677448	0.740188	40424	0.0880289	0.0408146	4.65177	4.61223	0.0317447	4.65387	0.0491308	0.0386315	1.61743	1.60739	1.61768
rs28701032	16480565		C	T	0.0546123	0.0569053	0.922017	40424	0.0860074	0.03987	4.6535	4.61128	0.0317623	4.6557	0.0552639	0.0377931	2.13825	2.12191	2.13872
rs28523679	16480476		C	T	0.0546125	0.0569079	0.922334	40424	0.0859631	0.0398624	4.65048	4.6083	0.0318176	4.65267	0.0553025	0.0377859	2.14205	2.12567	2.14252
rs145811735	16876490		G	C	0.00421476	0.00524961	0.689156	40424	0.332015	0.152547	4.73704	4.60736	0.031835	4.76115	0.300726	0.142267	4.46822	4.3105	4.49058
rs7862336	17355144		T	C	0.87512	0.880475	0.938633	40424	0.0590193	0.0275816	4.57877	4.60682	0.031845	4.57991	0.0708602	0.02635	7.23174	7.29857	7.2345
rs138249689	17014190		T	A	0.00601286	0.0053191	0.450076	40424	-0.381267	0.181634	4.40621	4.60135	0.0319468	4.43203	-0.397538	0.175303	5.14255	5.44221	5.17663
rs78505148	16481722		T	C	0.0579095	0.0599087	0.853826	40424	0.0871023	0.0404468	4.63758	4.59585	0.0320494	4.63972	0.0530412	0.0383158	1.91633	1.90257	1.9167
rs10122934	16477357		C	T	0.0720015	0.0747466	0.837425	40424	0.0789785	0.0367086	4.62895	4.59223	0.0321172	4.63077	0.0558389	0.0348213	2.57149	2.55268	2.57205
rs201653189	16418938		C	T	0.000814922	0.000641824	0.188786	40424	-1.69525	0.841832	4.05526	4.59209	0.0321198	4.17154	-1.35728	0.819988	2.73982	3.04816	2.78758
rs7864210	16875274		A	G	0.0815034	0.0792976	0.990123	40424	-0.0689248	0.0322966	4.55448	4.5907	0.0321459	4.55612	-0.065913	0.0309647	4.53114	4.57486	4.53269
rs190912112	17252912		C	G	0.00624322	0.00577779	0.25461	40424	-0.489468	0.232513	4.43154	4.588	0.0321966	4.44631	-0.412558	0.222634	3.43389	3.55916	3.4432
rs7858780	16497654		C	T	0.0181146	0.0166378	0.376522	40424	-0.241333	0.114214	4.46475	4.58472	0.0322582	4.4742	-0.263795	0.107895	5.97772	6.18985	5.99411
rs10756878	17380998		T	A	0.624759	0.62628	0.85391	40424	0.0417897	0.0195439	4.57212	4.57916	0.0323631	4.57269	0.0337555	0.0186215	3.28594	3.29088	3.28621
rs10756830	16895320		A	T	0.96254	0.964938	0.988717	40424	0.0998345	0.0469796	4.51588	4.57588	0.0324251	4.51931	0.108583	0.0451248	5.79021	5.89423	5.79567
rs10114662	17383073		C	G	0.599914	0.600404	0.845278	40424	0.0414359	0.0193837	4.56963	4.57551	0.0324321	4.57019	0.0319463	0.0184707	2.9914	2.99489	2.99162
rs113507803	16901207		T	C	0.0370823	0.0346703	0.97105	40424	-0.101162	0.0476111	4.51457	4.5752	0.032438	4.51805	-0.111887	0.0457141	5.99044	6.10092	5.99637
rs4961422	16851320		G	A	0.0887384	0.100294	0.933104	40424	0.06506	0.030343	4.59737	4.56828	0.0325693	4.59882	0.0933276	0.0289881	10.3653	10.2453	10.3725
rs139466551	16945116		C	T	0.00342285	0.00249188	0.354477	40424	-0.620536	0.298671	4.31666	4.56373	0.0326559	4.34405	-0.813296	0.286555	8.05529	8.85473	8.14705
rs112351372	16901261		T	G	0.037072	0.0346641	0.970614	40424	-0.101065	0.047627	4.5029	4.5633	0.0326641	4.50637	-0.111815	0.0457287	5.97887	6.08904	5.98477
rs112170328	16901273		T	C	0.0370731	0.034666	0.970577	40424	-0.101048	0.0476267	4.50148	4.56185	0.0326917	4.50494	-0.111797	0.0457284	5.97712	6.08724	5.98302
rs36084473	16847601		T	C	0.0706481	0.0672821	0.965669	40424	-0.0743561	0.0349717	4.52064	4.5612	0.0327042	4.52249	-0.071315	0.0335052	4.53041	4.57971	4.53222
rs10733329	16895897		A	G	0.962697	0.965116	0.988833	40424	0.0999011	0.0470955	4.49969	4.55946	0.0327374	4.5031	0.10946	0.0452341	5.85565	5.96157	5.86124
rs10810781	17384459		A	G	0.600136	0.600645	0.845444	40424	0.0413439	0.0193853	4.54861	4.55446	0.0328331	4.54917	0.0320534	0.018472	3.01107	3.0146	3.01129
rs1999214	16740141		T	C	0.0700229	0.0735183	0.729451	40424	0.0846553	0.0395064	4.5917	4.55354	0.0328508	4.59366	0.0588137	0.0374835	2.46194	2.44387	2.46248
rs186715805	17039006		T	G	0.00255539	0.0032029	0.69301	40424	0.420254	0.193365	4.72353	4.55324	0.0328565	4.76157	0.337921	0.181604	3.46243	3.32909	3.48324
rs112011183	16915932		TGTGA	T	0.0350977	0.0329758	0.870409	40424	-0.108795	0.0513531	4.48832	4.55049	0.0329093	4.49221	-0.105114	0.049509	4.50772	4.58325	4.51136
rs113776660	16901437		T	C	0.0371039	0.0347023	0.970371	40424	-0.100849	0.0476054	4.48775	4.54782	0.0329607	4.49119	-0.111594	0.0457066	5.96103	6.07067	5.9669
rs10738451	16713666		T	C	0.286346	0.297774	0.743956	40424	0.0473937	0.022203	4.55634	4.54625	0.0329909	4.55699	0.0357133	0.0211155	2.86059	2.85435	2.86082
rs146767086	17111006		A	T	0.00296076	0.00350972	0.198012	40424	0.716203	0.331469	4.66861	4.54392	0.0330359	4.71139	0.799588	0.312322	6.55432	6.27034	6.63293
rs6475056	16468540		T	C	0.902636	0.900656	0.525615	40424	-0.0852674	0.0398711	4.57352	4.5415	0.0330826	4.57521	-0.0823009	0.037985	4.69445	4.65321	4.69615
rs10119555	16899897		C	A	0.962588	0.964966	0.977611	40424	0.0999588	0.0472349	4.47833	4.53787	0.0331528	4.48172	0.109221	0.0453623	5.79723	5.90175	5.80273
rs13300416	16987464		G	A	0.36071	0.369459	0.953109	40424	0.0394161	0.0184923	4.54321	4.53761	0.0331579	4.54378	0.0395062	0.0176797	4.99322	4.98514	4.99385
rs10733327	16895824		A	G	0.962597	0.964989	0.990434	40424	0.0993201	0.0469405	4.47692	4.53611	0.0331869	4.48029	0.108207	0.0450884	5.75944	5.86258	5.76484
rs7019028	16899090		T	C	0.0368383	0.0344242	0.980799	40424	-0.100656	0.0475825	4.47495	4.53473	0.0332137	4.47837	-0.111384	0.0457022	5.93978	6.04883	5.94561
rs10733326	16895651		C	A	0.962597	0.964989	0.991187	40424	0.0992979	0.0469405	4.47491	4.53405	0.0332269	4.47827	0.108184	0.0450884	5.75702	5.8601	5.76242
rs199952892	17334906		A	AT	0.607706	0.609289	0.825322	40424	0.0418805	0.0196828	4.52742	4.5338	0.0332317	4.52798	0.03452	0.018754	3.38809	3.39281	3.38837
rs4961439	17392921		G	A	0.596448	0.596698	0.845012	40424	0.0412008	0.0193666	4.52591	4.53149	0.0332766	4.52645	0.031288	0.0184544	2.87446	2.87762	2.87466
rs182031	17001122		C	A	0.641174	0.645221	0.982604	40424	0.0390151	0.0183454	4.52285	4.53029	0.0333	4.5234	0.0346468	0.0175211	3.91022	3.91722	3.9106
rs10118889	16900029		T	C	0.962679	0.965063	0.978903	40424	0.0998916	0.0472693	4.4658	4.52505	0.0334021	4.46917	0.109482	0.0453945	5.81676	5.9218	5.8223
rs112862960	16559264		A	AT	0.0263123	0.024998	0.398248	40424	-0.192047	0.0912528	4.42918	4.52483	0.0334064	4.43533	-0.1576	0.0858506	3.36997	3.44002	3.37359
rs1442524	17391822		G	C	0.597408	0.597643	0.847469	40424	0.0411282	0.0193476	4.5188	4.52438	0.0334152	4.51935	0.0312064	0.0184372	2.86482	2.86797	2.86502
rs76353000	16901553		G	C	0.0371691	0.0347723	0.971467	40424	-0.10043	0.0475339	4.46399	4.52354	0.0334316	4.46739	-0.111189	0.0456359	5.93622	6.04513	5.94203
rs10733325	16895610		C	T	0.96241	0.964823	0.99991	40424	0.0987672	0.0467448	4.46436	4.52316	0.033439	4.46769	0.108069	0.0448934	5.79477	5.89867	5.80021
rs10733328	16895829		A	T	0.962736	0.965124	0.988377	40424	0.0995256	0.0471107	4.46304	4.52206	0.0334605	4.4664	0.108683	0.0452497	5.76885	5.87239	5.77428
rs10733330	16895908		A	G	0.962684	0.965067	0.987059	40424	0.0995219	0.0471108	4.46269	4.52168	0.033468	4.46604	0.10868	0.0452499	5.76852	5.87202	5.77394
rs148757981	16970136		A	G	0.00223146	0.00248198	0.131136	40424	1.04579	0.48348	4.67877	4.52108	0.0334797	4.72572	0.880661	0.455876	3.73185	3.58846	3.76133
rs379274	16999123		G	A	0.641504	0.645529	0.987906	40424	0.0388881	0.018307	4.5123	4.51973	0.0335061	4.51286	0.0344295	0.0174823	3.87851	3.88544	3.87889
rs73422902	16901617		T	C	0.037175	0.0347805	0.971335	40424	-0.100363	0.0475326	4.45828	4.51772	0.0335455	4.46167	-0.111132	0.0456341	5.9306	6.03935	5.9364
rs5000910	16897861		A	G	0.962485	0.964883	0.990538	40424	0.0988635	0.0468276	4.45727	4.51597	0.0335798	4.4606	0.108053	0.0449773	5.77148	5.87482	5.77689
rs77677612	17294776		T	G	0.125703	0.120471	0.945902	40424	-0.0579379	0.0273549	4.48597	4.5128	0.0336421	4.48705	-0.0688577	0.0261341	6.94209	7.00406	6.9446
rs55863202	17210004		T	C	0.0404064	0.0352117	0.867351	40424	-0.105567	0.0500524	4.44844	4.50974	0.0337024	4.45155	-0.122851	0.0476913	6.63563	6.76846	6.64267
rs2254330	16802973		A	G	0.235945	0.247784	0.929299	40424	0.0451049	0.0212152	4.52014	4.50805	0.0337357	4.52081	0.036261	0.0202327	3.21196	3.20293	3.21227
rs1928850	16765520		A	T	0.926023	0.923103	0.808533	40424	-0.0782741	0.0367512	4.53622	4.50094	0.0338762	4.53794	-0.0620764	0.0348045	3.18114	3.15582	3.18199
rs200782034	16805331		G	GT	0.0656183	0.067982	0.721559	40424	0.0879309	0.0412736	4.53877	4.5005	0.0338849	4.54077	0.0483669	0.0390605	1.53328	1.52399	1.53351
0	17242312		TTC	T	0.133949	0.129343	0.914385	40424	-0.0571494	0.0270341	4.46891	4.49441	0.0340058	4.46994	-0.0646502	0.0258479	6.25589	6.30637	6.25783
rs143128609	16551132		T	C	0.0010706	0.00072836	0.238624	40424	-1.42829	0.719237	3.94359	4.49402	0.0340136	4.03434	-1.77063	0.693183	6.52472	7.78353	6.77621
rs12684800	16893054		A	G	0.0805512	0.0782228	0.97857	40424	-0.0687593	0.0325654	4.4581	4.49358	0.0340224	4.4597	-0.0669862	0.0312087	4.60701	4.65232	4.60864
rs34473495	16901900		C	T	0.0372017	0.0348172	0.970833	40424	-0.100053	0.0475247	4.43223	4.49113	0.0340711	4.43558	-0.110855	0.0456245	5.90362	6.01161	5.90937
rs4961557	17398404		G	A	0.596746	0.597224	0.842138	40424	0.0410991	0.0194104	4.48327	4.48881	0.0341174	4.4838	0.032506	0.0185002	3.08727	3.09084	3.0875
rs12000228	16559261		G	A	0.0262901	0.0249788	0.398483	40424	-0.191277	0.0912549	4.39351	4.488	0.0341336	4.39957	-0.157022	0.0858524	3.34517	3.41445	3.34874
rs61132125	16855653		A	G	0.09216	0.103924	0.944226	40424	0.0629887	0.0296419	4.51557	4.48762	0.0341412	4.51693	0.0905645	0.0283149	10.2302	10.1142	10.2371
rs78301771	16847054		T	C	0.0873847	0.0990139	0.951997	40424	0.0642684	0.0302426	4.51604	4.48758	0.034142	4.51746	0.0898592	0.0288981	9.6691	9.55982	9.67548
rs10123109	17391173		A	G	0.599975	0.600274	0.84438	40424	0.0410922	0.0194133	4.48043	4.48606	0.0341723	4.48097	0.0318444	0.0184985	2.96341	2.96681	2.96362
rs35619477	16901949		T	C	0.0372066	0.034824	0.970775	40424	-0.0999896	0.0475228	4.42696	4.48575	0.0341785	4.4303	-0.110797	0.0456222	5.898	6.00584	5.90374
rs200978023	16514488		A	AT	0.0157669	0.0141689	0.407282	40424	-0.247806	0.118724	4.35657	4.48451	0.0342034	4.36724	-0.286033	0.112096	6.51109	6.77574	6.53443
rs4132613	16898285		C	T	0.962421	0.964817	0.999102	40424	0.0983106	0.0467304	4.42591	4.48405	0.0342126	4.4292	0.10763	0.0448828	5.75049	5.8533	5.75586
rs10810687	16938522		A	G	0.079351	0.0823183	0.365986	40424	0.112195	0.0528115	4.51325	4.48304	0.0342328	4.51487	0.0965223	0.0502328	3.69217	3.66389	3.69318
rs141457510	16489760		C	T	0.0187368	0.0169898	0.543745	40424	-0.190569	0.0910142	4.38418	4.48127	0.0342682	4.39116	-0.131816	0.0868508	2.30351	2.34704	2.30546
rs34829493	17095676		C	A	0.317421	0.324612	0.934989	40424	0.0406551	0.0191958	4.48558	4.47774	0.0343391	4.48616	0.0392879	0.0183262	4.5959	4.58584	4.59646
rs10119515	16899565		G	A	0.962686	0.965054	0.982299	40424	0.0992137	0.0471965	4.419	4.47724	0.0343491	4.4223	0.108731	0.0453264	5.75445	5.85768	5.75986
rs10119513	16899526		G	A	0.962687	0.965054	0.982606	40424	0.0991789	0.0471905	4.41703	4.47521	0.03439	4.42032	0.108692	0.0453209	5.75174	5.85489	5.75714
rs144248402	17309527		A	T	0.00152928	0.00145822	0.227083	40424	-1.01178	0.501065	4.07745	4.47331	0.0344282	4.15344	-0.566968	0.4693	1.45954	1.54124	1.47171
rs34303558	17094537		A	G	0.317458	0.324651	0.935494	40424	0.0406229	0.0191906	4.48092	4.47309	0.0344327	4.4815	0.0392571	0.0183215	4.59109	4.58106	4.59165
rs1934283	16897712		A	T	0.962513	0.964892	0.990862	40424	0.0984055	0.0468354	4.41459	4.47243	0.034446	4.41785	0.107516	0.0449827	5.71283	5.81458	5.71813
rs35336333	16865786		G	A	0.0691819	0.0654953	0.956568	40424	-0.0750221	0.0356383	4.43145	4.47214	0.0344518	4.43331	-0.078153	0.0341121	5.24898	5.31228	5.2515
rs146871746	17402974		C	T	0.00249913	0.00185369	0.528938	40424	-0.571788	0.28157	4.12378	4.47042	0.0344865	4.187	-0.644972	0.274936	5.50325	6.13253	5.60669
rs10756850	16989641		T	G	0.649887	0.653234	0.990312	40424	0.0390442	0.018484	4.46192	4.46971	0.0345008	4.46247	0.0336965	0.0176512	3.64433	3.65109	3.64467
rs659637	17292821		C	T	0.125274	0.120019	0.944775	40424	-0.0577865	0.0274199	4.44142	4.46791	0.0345372	4.44248	-0.0690167	0.0261942	6.94222	7.00436	6.94474
rs10119493	16899464		G	C	0.962687	0.965052	0.983102	40424	0.0990717	0.0471804	4.40936	4.46738	0.0345479	4.41264	0.108574	0.0453114	5.74161	5.84448	5.747
rs7859111	16768707		A	G	0.925608	0.922489	0.815336	40424	-0.0774516	0.036503	4.50197	4.46729	0.0345497	4.50366	-0.0626309	0.0345759	3.28118	3.25485	3.28208
rs144638949	16841499		T	C	0.00148274	0.00111615	0.213487	40424	-1.19051	0.590791	4.0607	4.46555	0.034585	4.13523	-1.44236	0.584891	6.08127	6.9666	6.23847
rs112182519	16901022		G	A	0.0372117	0.03484	0.969764	40424	-0.0997987	0.0475446	4.40603	4.46429	0.0346105	4.40934	-0.110261	0.0456537	5.83303	5.93886	5.83863
rs10756833	16899267		G	C	0.96268	0.965042	0.984537	40424	0.0988708	0.0471478	4.39758	4.45534	0.0347923	4.40084	0.108375	0.0452812	5.72829	5.83075	5.73365
rs34792579	16693016		T	TA	0.820969	0.810717	0.713096	40424	-0.0560242	0.0264946	4.47135	4.4543	0.0348135	4.47213	-0.0583096	0.0251877	5.35924	5.33315	5.3603
rs4961555	17385348		C	T	0.599626	0.599972	0.845294	40424	0.04087	0.0193795	4.44757	4.4532	0.0348359	4.4481	0.03126	0.0184669	2.86543	2.86869	2.86563
rs77566809	16617744		T	C	0.0186515	0.0169644	0.403465	40424	-0.227977	0.109534	4.33198	4.45309	0.0348382	4.34115	-0.231012	0.103322	4.99896	5.16737	5.01152
rs17740716	16690025		A	G	0.0240174	0.0220177	0.552088	40424	-0.169462	0.081146	4.36125	4.45234	0.0348535	4.36637	-0.182701	0.0768374	5.65376	5.80927	5.664
rs12346397	17311346		G	A	0.874547	0.879787	0.945328	40424	0.0576109	0.0273891	4.42438	4.4507	0.0348869	4.42544	0.0689426	0.0261653	6.94262	7.00469	6.94513
rs76920856	17372041		T	C	0.0594764	0.0616115	0.550932	40424	0.104023	0.0490906	4.49018	4.44942	0.0349131	4.49259	0.107513	0.046633	5.31538	5.24971	5.31868
rs10810660	16899120		A	G	0.962689	0.965048	0.986275	40424	0.0987312	0.0471189	4.39054	4.44813	0.0349395	4.39379	0.108168	0.0452534	5.71337	5.81539	5.7187
rs35133355	16902402		T	C	0.0371697	0.0348032	0.969312	40424	-0.099736	0.0476097	4.38846	4.44653	0.0349722	4.39175	-0.110671	0.045702	5.86398	5.97097	5.86966
rs60099744	16852799		G	GA	0.0919988	0.10388	0.93851	40424	0.0628287	0.0297054	4.47347	4.44588	0.0349856	4.47481	0.0913579	0.0283784	10.3638	10.2454	10.3709
rs1759615	17307345		C	A	0.125494	0.120264	0.945684	40424	-0.0575409	0.0273806	4.41638	4.44262	0.0350524	4.41743	-0.0688496	0.0261574	6.92807	6.98992	6.93057
rs35259357	16902426		A	C	0.0371666	0.0348019	0.969399	40424	-0.099683	0.0476113	4.38351	4.44148	0.0350758	4.38679	-0.110627	0.0457034	5.85898	5.96583	5.86465
rs34641134	16902433		C	A	0.0371674	0.0348028	0.969397	40424	-0.0996734	0.0476111	4.3827	4.44066	0.0350927	4.38599	-0.11062	0.0457031	5.85832	5.96516	5.864
rs139180562	17267896		A	G	0.0233252	0.0205733	0.817727	40424	-0.139733	0.0669463	4.35656	4.44017	0.0351028	4.36203	-0.13517	0.064059	4.45246	4.55497	4.45814
rs10121841	17384923		A	G	0.599529	0.599853	0.845384	40424	0.040797	0.0193763	4.43317	4.43875	0.035132	4.43369	0.0311807	0.0184641	2.85178	2.85501	2.85198
rs10962677	16900875		T	C	0.96276	0.965132	0.971593	40424	0.0993971	0.0474902	4.38066	4.43841	0.035139	4.38393	0.109966	0.0456001	5.81551	5.92084	5.82108
rs12685078	16846636		G	T	0.0703172	0.0668119	0.98448	40424	-0.0732156	0.0349076	4.39914	4.43817	0.0351439	4.4009	-0.0720958	0.0334435	4.64724	4.69869	4.64915
rs73424711	16902456		C	T	0.0371697	0.0348064	0.969393	40424	-0.0996343	0.04761	4.37946	4.43735	0.0351608	4.38274	-0.110586	0.0457019	5.85503	5.96177	5.8607
rs3739489	17394996		T	C	0.911225	0.916822	0.927646	40424	0.0681731	0.0325069	4.39818	4.43345	0.0352412	4.39966	0.0777476	0.0310143	6.28419	6.3563	6.28717
rs180805831	17349746		C	A	0.00630029	0.00545956	0.592436	40424	-0.316153	0.152858	4.27778	4.4332	0.0352464	4.29482	-0.295006	0.14653	4.05329	4.22254	4.06864
rs954859	16898375		C	T	0.962438	0.964816	0.999112	40424	0.097782	0.0467498	4.37479	4.43181	0.0352751	4.378	0.107228	0.0448964	5.70421	5.80563	5.70948
rs13295308	16891877		C	A	0.0812853	0.0790694	0.995751	40424	-0.067552	0.0322145	4.39719	4.43158	0.0352798	4.39872	-0.0645605	0.0308797	4.37106	4.41254	4.37251
rs73424713	16902492		A	G	0.0371849	0.0348232	0.969661	40424	-0.0995138	0.0475939	4.37184	4.42957	0.0353214	4.3751	-0.11049	0.0456859	5.84898	5.95554	5.85463
rs10962673	16898229		A	G	0.962957	0.965343	0.984567	40424	0.0989987	0.0473485	4.37167	4.42906	0.035332	4.37491	0.109267	0.0454787	5.77246	5.87642	5.77793
rs73419403	16562605		T	A	0.0265034	0.025178	0.396604	40424	-0.189686	0.0911056	4.33492	4.42753	0.0353636	4.34084	-0.159694	0.0857498	3.46827	3.54147	3.47211
rs1113381	17315307		T	C	0.874587	0.87984	0.945458	40424	0.057459	0.02739	4.40079	4.42695	0.0353757	4.40184	0.0688544	0.0261637	6.92574	6.98773	6.92825
rs73646718	16902541		T	C	0.0371902	0.0348294	0.969666	40424	-0.099478	0.0475917	4.3691	4.42677	0.0353794	4.37236	-0.110468	0.0456836	5.84727	5.95378	5.85292
rs34919930	16895222		G	A	0.0812096	0.0788132	0.994033	40424	-0.067682	0.0322979	4.39134	4.42582	0.0353991	4.39287	-0.0663012	0.0309449	4.59055	4.63542	4.59215
rs263603	17095980		T	C	0.31729	0.325121	0.929874	40424	0.04043	0.0192031	4.43269	4.42504	0.0354153	4.43325	0.0412264	0.0183404	5.05283	5.04139	5.05351
rs7021921	16880833		T	C	0.0815406	0.079678	0.997852	40424	-0.0673417	0.0321392	4.39034	4.4244	0.0354286	4.39186	-0.064655	0.0308019	4.40606	4.44767	4.40752
rs7861969	16561747		A	T	0.0265011	0.025176	0.396641	40424	-0.189611	0.0911021	4.3318	4.4243	0.0354306	4.33771	-0.159693	0.0857473	3.46841	3.54161	3.47225
rs7847768	16561297		T	A	0.0265002	0.0251748	0.39666	40424	-0.18959	0.0911005	4.33099	4.42346	0.0354481	4.3369	-0.159725	0.0857461	3.46991	3.54316	3.47375
rs112258824	16561098		A	G	0.0264998	0.0251743	0.396662	40424	-0.18957	0.0911	4.33014	4.42258	0.0354664	4.33604	-0.159738	0.0857461	3.47047	3.54373	3.47431
rs113520717	16560993		T	TG	0.0264995	0.0251742	0.396664	40424	-0.189541	0.0910995	4.32886	4.42125	0.035494	4.33475	-0.159716	0.0857458	3.46953	3.54276	3.47337
rs10738465	16898879		A	T	0.9627	0.965053	0.989384	40424	0.0983132	0.0470623	4.36393	4.42094	0.0355005	4.36713	0.107767	0.0451991	5.68481	5.78599	5.69008
rs10738464	16898855		A	G	0.9627	0.965054	0.989704	40424	0.0983	0.0470564	4.36385	4.42086	0.0355021	4.36706	0.107758	0.0451935	5.68523	5.78641	5.6905
rs144434289	17307575		A	AT	0.124655	0.11936	0.944479	40424	-0.0576788	0.0275259	4.39086	4.41704	0.0355817	4.39191	-0.069282	0.0262949	6.94223	7.0047	6.94477
rs10122189	16777696		C	A	0.0682959	0.0712001	0.797135	40424	0.0808537	0.03832	4.45194	4.41612	0.0356009	4.45375	0.0549388	0.03641	2.27676	2.26071	2.27722
rs7030387	16590711		G	A	0.916317	0.91741	0.440821	40424	0.101925	0.0487663	4.3684	4.4142	0.035641	4.37047	0.0873307	0.0460314	3.59936	3.63663	3.60062
rs73424715	16902668		G	A	0.037202	0.0348477	0.969693	40424	-0.0992867	0.047586	4.35334	4.41069	0.0357144	4.35658	-0.110271	0.0456773	5.82803	5.934	5.83364
rs2243836	16808515		C	T	0.0618239	0.0638911	0.738009	40424	0.0883817	0.0419075	4.44776	4.40964	0.0357364	4.44976	0.045072	0.0397008	1.28888	1.28147	1.28905
rs73424717	16902720		T	C	0.0372076	0.0348541	0.969715	40424	-0.0992534	0.0475841	4.35077	4.40807	0.0357693	4.35401	-0.110244	0.0456751	5.82574	5.93164	5.83134
rs116449108	16797047		C	T	0.00795991	0.00884291	0.312149	40424	0.358099	0.168073	4.53954	4.40742	0.0357829	4.55511	0.263939	0.158232	2.78238	2.71456	2.78966
rs73424719	16902750		C	G	0.0372103	0.0348592	0.969732	40424	-0.099186	0.0475823	4.3452	4.40239	0.0358886	4.34843	-0.110177	0.0456733	5.8191	5.92482	5.8247
rs10116469	16783095		A	T	0.0804234	0.0841241	0.753537	40424	0.0768616	0.0364996	4.43447	4.40237	0.035889	4.43601	0.0574034	0.0346834	2.73925	2.72035	2.73982
rs58134658	16903722		C	A	0.0377739	0.0355292	0.954579	40424	-0.0989004	0.0474461	4.34505	4.40201	0.0358966	4.34828	-0.107983	0.0455616	5.61709	5.71699	5.62229
rs7857751	16560638		A	T	0.0264691	0.0251504	0.396819	40424	-0.189181	0.0911245	4.31008	4.40192	0.0358985	4.31594	-0.159068	0.0857647	3.43991	3.51223	3.44369
rs10810659	16896819		T	C	0.962234	0.96453	0.985782	40424	0.0975611	0.0468054	4.34472	4.40109	0.035916	4.34788	0.105977	0.0449438	5.56009	5.65754	5.5651
rs10283690	17394136		C	T	0.597322	0.59751	0.843002	40424	0.0406726	0.0193995	4.39565	4.401	0.0359179	4.39617	0.0309197	0.0184862	2.79754	2.80058	2.79773
rs10738462	16896831		G	A	0.962234	0.964529	0.985831	40424	0.097558	0.0468048	4.34455	4.40092	0.0359195	4.34771	0.10597	0.0449434	5.55949	5.65691	5.56449
rs4409488	16900527		G	T	0.546274	0.550839	0.381399	40424	0.0596409	0.0284392	4.39798	4.4006	0.0359263	4.39852	0.0645899	0.0271625	5.65446	5.65906	5.65524
rs7029578	16560269		A	G	0.0264683	0.0251502	0.396841	40424	-0.189107	0.0911213	4.30702	4.39874	0.0359655	4.31286	-0.159023	0.0857619	3.4382	3.51046	3.44198
rs7018594	16559836		G	A	0.0264674	0.0251492	0.396869	40424	-0.189085	0.0911184	4.30629	4.39798	0.0359815	4.31213	-0.159025	0.08576	3.43846	3.51072	3.44223
rs7025392	16897378		G	C	0.962237	0.964532	0.984744	40424	0.0975359	0.0468102	4.34157	4.39788	0.0359836	4.34472	0.106014	0.0449485	5.56281	5.66033	5.56783
rs7868424	16876106		G	C	0.0805155	0.0783036	0.977853	40424	-0.0680259	0.0325667	4.36317	4.39744	0.0359929	4.3647	-0.0659229	0.031215	4.4601	4.50315	4.46162
rs6475126	17309374		T	A	0.874578	0.879791	0.943291	40424	0.0573328	0.0274221	4.37125	4.39709	0.0360003	4.37228	0.0687068	0.0261947	6.87976	6.94101	6.88223
rs10544302	16876382		CCTG	C	0.0802837	0.0780447	0.973487	40424	-0.0682171	0.032665	4.36135	4.3957	0.0360297	4.36288	-0.066305	0.0313089	4.48493	4.52845	4.48647
rs12002297	16559255		T	A	0.0262317	0.0249351	0.398786	40424	-0.189378	0.0912922	4.30321	4.39483	0.0360481	4.30903	-0.155516	0.0858875	3.27861	3.34587	3.28204
rs147939280	16666758		A	C	0.00321373	0.00288627	0.28727	40424	-0.629731	0.308343	4.17101	4.39088	0.0361317	4.20626	-0.649438	0.298112	4.74586	5.05881	4.78727
rs7035471	16498584		C	T	0.0150568	0.013472	0.394205	40424	-0.255817	0.123925	4.26131	4.38986	0.0361533	4.2719	-0.294437	0.11707	6.32545	6.59261	6.34863
rs10481508	16849720		C	T	0.928203	0.931542	0.987886	40424	0.071857	0.0344725	4.34502	4.38269	0.0363057	4.34669	0.068678	0.0330224	4.32531	4.37061	4.32693
rs139018891	16908753		G	T	0.00236161	0.00216936	0.169346	40424	-0.981644	0.485749	4.084	4.38108	0.03634	4.12963	-0.838318	0.459383	3.33018	3.5621	3.35849
rs12685962	16849517		C	G	0.0714037	0.0680571	0.971496	40424	-0.0723266	0.0347108	4.34178	4.37964	0.0363707	4.34347	-0.069148	0.0332472	4.32564	4.37124	4.32728
rs57863895	16902988		T	C	0.0372209	0.034879	0.96972	40424	-0.0989367	0.0475863	4.32266	4.37938	0.0363762	4.32585	-0.109949	0.0456759	5.79437	5.89941	5.79992
rs10738461	16891619		G	C	0.918815	0.921	0.979675	40424	0.0673667	0.0323332	4.34104	4.37492	0.0364715	4.34254	0.0645578	0.0309896	4.33977	4.38094	4.34121
rs191282896	16939869		G	A	0.00111363	0.00086178	0.301778	40424	-1.18223	0.614295	3.70383	4.37397	0.0364919	3.87317	-1.15472	0.60038	3.69914	4.42017	3.8461
rs10123118	16778780		G	A	0.0682151	0.0710759	0.805244	40424	0.0802014	0.0381993	4.40813	4.37275	0.036518	4.4099	0.0537239	0.0362876	2.19189	2.17671	2.19231
rs3935374	16826766		C	T	0.0587365	0.0614077	0.560726	40424	0.103275	0.0491597	4.41337	4.37174	0.0365397	4.41561	0.0609195	0.0465114	1.71551	1.70334	1.71585
rs954858	16898603		T	C	0.962326	0.96472	0.999912	40424	0.096967	0.0466756	4.31588	4.37171	0.0365403	4.31898	0.107178	0.0448191	5.71856	5.82028	5.72386
rs2243614	16802998		T	C	0.0656463	0.0680612	0.762851	40424	0.0843147	0.0401636	4.40697	4.37063	0.0365635	4.40882	0.047501	0.0380177	1.56111	1.55164	1.56134
rs188088140	16518829		C	T	0.0062737	0.00691782	0.300328	40424	0.409061	0.193005	4.49198	4.36834	0.0366126	4.51444	0.360691	0.181444	3.95171	3.82198	3.9692
rs10962782	16976885		C	T	0.0394075	0.0425594	0.920261	40424	0.0957282	0.045568	4.41327	4.3675	0.0366307	4.41607	0.0771548	0.0433462	3.16828	3.13346	3.16972
rs7875708	16707743		A	G	0.942722	0.938815	0.732056	40424	-0.0900181	0.0428861	4.40581	4.36679	0.036646	4.40779	-0.0918521	0.0406827	5.09752	5.03916	5.10023
rs71513276	16882414		G	A	0.0802657	0.0779623	0.977528	40424	-0.0678214	0.0326093	4.32565	4.3596	0.0368009	4.32716	-0.0662915	0.0312537	4.49897	4.54272	4.50053
rs77703092	17315854		G	A	0.124595	0.119304	0.944415	40424	-0.0572845	0.0275305	4.32957	4.35525	0.036895	4.33059	-0.0690109	0.0262966	6.88709	6.94894	6.88959
rs10738463	16896903		G	A	0.962499	0.96488	0.999104	40424	0.0969858	0.0467898	4.2965	4.35202	0.0369651	4.29959	0.107149	0.0449342	5.6862	5.78725	5.69145
rs7030293	16493836		T	C	0.64887	0.643937	0.385488	40424	-0.061355	0.0294	4.35517	4.34953	0.0370192	4.35579	-0.0643199	0.0279621	5.29116	5.28058	5.29193
rs10122736	16783482		C	T	0.0801729	0.0838474	0.754536	40424	0.0764381	0.0365283	4.37887	4.3473	0.0370677	4.38037	0.0575075	0.0347119	2.74468	2.72567	2.74525
rs10756828	16892590		A	T	0.918593	0.920748	0.995408	40424	0.0668479	0.0321853	4.31381	4.34721	0.0370696	4.31528	0.0633776	0.0308489	4.22077	4.26008	4.22212
rs71513275	16882161		T	G	0.0790012	0.0766955	0.971448	40424	-0.0685387	0.033003	4.31286	4.34707	0.0370727	4.31441	-0.0672745	0.0316356	4.52217	4.56678	4.52378
rs7854653	16496452		G	A	0.0163386	0.0147902	0.389564	40424	-0.244123	0.118842	4.21964	4.33884	0.0372523	4.22922	-0.270278	0.112357	5.7865	6.0068	5.80422
rs7868212	16881914		G	A	0.0813407	0.0790487	0.999925	40424	-0.0667664	0.0321824	4.30407	4.33736	0.0372847	4.30554	-0.0651296	0.0308394	4.46011	4.50281	4.46162
rs954857	16898753		T	G	0.96249	0.964805	0.999271	40424	0.0967193	0.0467485	4.28047	4.33563	0.0373226	4.28354	0.105587	0.0448942	5.53147	5.62825	5.53644
rs144731601	16761630		G	C	0.0174123	0.0196611	0.356978	40424	0.224463	0.106981	4.40228	4.33528	0.0373303	4.40849	0.272854	0.100944	7.30628	7.1349	7.32386
rs11788180	17107016		G	A	0.0339352	0.031053	0.460274	40424	-0.15264	0.0738574	4.27117	4.33119	0.0374201	4.27443	-0.167725	0.0706406	5.63754	5.74668	5.64318
rs34358697	16899083		T	C	0.0814268	0.079078	0.991869	40424	-0.0668564	0.0322771	4.29038	4.32357	0.037588	4.29184	-0.0654037	0.0309268	4.47234	4.5154	4.47386
rs143871427	17402950		C	A	0.00028151	0.000431359	0.146489	40424	2.41178	1.18424	4.14756	4.32301	0.0376004	4.5345	2.84923	1.10959	6.59366	6.6069	7.54837
rs7865075	16875752		C	A	0.00281197	0.00447761	0.601058	28728	0.351753	0.166917	4.44093	4.32115	0.0376415	4.47801	0.453744	0.157137	8.33803	7.91142	8.47288
rs10810639	16824430		A	G	0.243018	0.250922	0.620717	40424	0.0535446	0.0257313	4.33021	4.31818	0.0377072	4.33087	0.0450308	0.0244481	3.39256	3.38262	3.39292
rs62558260	17080071		C	T	0.274391	0.280919	0.94794	40424	0.0413513	0.019884	4.32486	4.31509	0.0377758	4.32544	0.0397768	0.018975	4.39435	4.38196	4.39491
rs74543821	16506955		A	G	0.015082	0.0134837	0.398826	40424	-0.252527	0.123399	4.18786	4.31425	0.0377944	4.1981	-0.292777	0.11636	6.33088	6.59815	6.35416
rs2026806	16690316		T	C	0.8201	0.809986	0.707309	40424	-0.0552532	0.0265576	4.32848	4.31224	0.0378391	4.32922	-0.0571839	0.0252464	5.13039	5.106	5.13136
rs7864745	16875622		C	T	0.0816051	0.0794638	0.986521	40424	-0.0668535	0.0323229	4.27786	4.31077	0.0378718	4.27931	-0.0646386	0.0309874	4.35125	4.39235	4.35268
rs10810622	16778858		A	G	0.0690635	0.0720349	0.796143	40424	0.0795131	0.0381731	4.33872	4.30437	0.0380146	4.34042	0.0545176	0.0362659	2.25983	2.24404	2.26028
rs16934806	16558218		G	C	0.0269273	0.0256863	0.393434	40424	-0.185979	0.0905847	4.21519	4.30274	0.038051	4.22068	-0.150069	0.0851998	3.10246	3.16334	3.10547
rs7858025	16560854		A	T	0.0843574	0.0832614	0.447431	40424	-0.099587	0.048262	4.25789	4.30149	0.038079	4.2598	-0.0869838	0.045535	3.6491	3.68668	3.65037
rs57133918	17119529		AT	A	0.282939	0.279109	0.942193	40424	-0.0413909	0.0199951	4.28512	4.29642	0.0381927	4.28569	-0.0350117	0.0190795	3.3674	3.37669	3.36772
rs117903929	17104180		C	T	0.0036523	0.003273	0.588214	40424	-0.40315	0.199134	4.09866	4.29515	0.0382212	4.1257	-0.345734	0.191121	3.27241	3.43257	3.29067
rs17743593	16809958		T	C	0.0689366	0.0703335	0.598189	40424	0.0922371	0.0443473	4.32591	4.29005	0.038336	4.32782	0.0381938	0.0420497	0.825008	0.821258	0.825074
rs71513279	16894688		C	T	0.0808581	0.0784898	0.97821	40424	-0.0670889	0.0325211	4.25569	4.28869	0.0383667	4.25714	-0.0669542	0.0311598	4.61705	4.66247	4.61868
rs881557	16915644		C	A	0.0823683	0.080136	0.92608	40424	-0.0678649	0.0328964	4.25593	4.28867	0.0383672	4.25738	-0.0709812	0.0315449	5.06325	5.11531	5.0652
rs10118165	17318031		T	C	0.766839	0.771085	0.591443	40424	0.0558743	0.0270366	4.2709	4.28836	0.0383742	4.27163	0.0642313	0.0258061	6.1951	6.23137	6.19653
rs7035276	17394536		C	T	0.872134	0.876752	0.912338	40424	0.0572118	0.027711	4.26252	4.28742	0.0383954	4.2635	0.068098	0.0264645	6.6213	6.67895	6.62359
rs73417483	16558716		T	C	0.0268274	0.025573	0.394701	40424	-0.185635	0.0906054	4.19769	4.28477	0.0384553	4.20314	-0.150724	0.0852387	3.12673	3.18845	3.1298
rs147777677	16883801		TAA	T	0.0791322	0.0768587	0.968517	40424	-0.0680717	0.0330207	4.24971	4.28317	0.0384915	4.25121	-0.0667531	0.0316501	4.44828	4.4918	4.44984
rs36021466	16880291		G	T	0.0801651	0.0779019	0.978628	40424	-0.0672009	0.0326183	4.2445	4.27748	0.0386206	4.24596	-0.0659191	0.0312645	4.44548	4.48844	4.447
rs145735862	16853543		T	G	0.00103125	0.00126048	0.120432	40424	1.51006	0.711142	4.50897	4.27316	0.0387189	4.61227	1.48909	0.662266	5.05567	4.79138	5.24708
rs13300696	16892517		G	A	0.0813039	0.0792177	0.995588	40424	-0.0663504	0.0322211	4.24038	4.27288	0.0387252	4.2418	-0.0635289	0.03088	4.23241	4.27185	4.23377
rs35483590	16893883		A	C	0.0821634	0.0804857	0.995539	40424	-0.0658668	0.0319914	4.23904	4.27126	0.0387622	4.24045	-0.0624416	0.0306594	4.14784	4.18578	4.14913
rs113332790	17232991		CAGAAA	C	0.132952	0.129035	0.918944	40424	-0.0556856	0.0270438	4.23986	4.26365	0.0389362	4.24079	-0.0613746	0.025837	5.64277	5.68631	5.64436
rs7044899	16873586		T	C	0.0812419	0.0792368	0.990561	40424	-0.0664285	0.0323005	4.22952	4.26182	0.0389781	4.23093	-0.0635775	0.0309653	4.21558	4.25472	4.21692
rs1125511	17120454		C	T	0.283193	0.279376	0.943687	40424	-0.0411807	0.0199743	4.25056	4.2617	0.0389809	4.25112	-0.0348402	0.0190593	3.34156	3.35075	3.34188
rs7021199	16556594		T	C	0.0846377	0.0835978	0.446306	40424	-0.099036	0.0482218	4.21793	4.26077	0.0390022	4.21979	-0.0849428	0.0454947	3.48603	3.52096	3.48718
rs1930641	17316541		T	G	0.856085	0.860036	0.842558	40424	0.0561697	0.0272899	4.23642	4.2598	0.0390245	4.23734	0.0633838	0.0260543	5.91828	5.96432	5.92
rs71513274	16877565		G	A	0.0806648	0.0784649	0.975317	40424	-0.0670041	0.0325934	4.22614	4.25886	0.0390461	4.22758	-0.0653797	0.0312351	4.38126	4.42323	4.38274
rs399345	17119924		T	C	0.283212	0.279396	0.943549	40424	-0.041158	0.0199755	4.24534	4.25647	0.0391011	4.2459	-0.0348391	0.0190604	3.34093	3.35011	3.34125
rs78362622	16799803		C	T	0.00782632	0.00869535	0.307282	40424	0.357547	0.170905	4.37681	4.25126	0.0392212	4.39123	0.268126	0.160902	2.77688	2.70912	2.78414
rs943745	16564112		A	G	0.0846218	0.0836738	0.447479	40424	-0.0988106	0.0481691	4.20795	4.25067	0.0392348	4.2098	-0.0840775	0.0454412	3.42343	3.45738	3.42454
rs4330781	16882634		A	G	0.998748	0.998494	0.193668	40424	-1.06546	0.505838	4.4366	4.24795	0.0392977	4.59406	-0.844343	0.474693	3.16383	2.99973	3.24361
rs144293592	16497937		C	A	0.0162946	0.0147472	0.389602	40424	-0.242067	0.119132	4.12874	4.24464	0.0393744	4.13786	-0.270665	0.112512	5.78721	6.00747	5.80493
rs10810783	17395742		A	G	0.871066	0.875558	0.901378	40424	0.0569809	0.0277477	4.21701	4.24146	0.0394482	4.21797	0.0674844	0.0264987	6.48573	6.54148	6.48792
rs191181746	17133250		G	A	0.00146516	0.00117392	0.179358	40424	-1.20573	0.606333	3.95437	4.23717	0.039548	4.00509	-1.16618	0.589123	3.9185	4.22587	3.95301
rs1442526	17395380		C	T	0.872108	0.876711	0.907459	40424	0.0569059	0.0277637	4.20107	4.22545	0.0398221	4.20203	0.068035	0.0265132	6.58477	6.64199	6.58703
rs151227244	16547052		A	T	0.020469	0.021938	0.588499	40424	0.162754	0.0785674	4.29122	4.22361	0.0398653	4.29685	0.120622	0.0741393	2.64701	2.60765	2.6492
rs111622431	16887786		T	TAGAA	0.997662	0.998075	0.375844	40424	0.662989	0.335182	3.91248	4.21949	0.0399622	3.96479	0.600315	0.322623	3.46232	3.7509	3.50172
rs55761409	16903603		C	G	0.037923	0.0357198	0.961871	40424	-0.0963028	0.0471884	4.16493	4.21818	0.039993	4.16788	-0.105663	0.0453004	5.4405	5.53539	5.44536
rs7035357	17394465		G	A	0.872274	0.876872	0.911216	40424	0.0567936	0.0277353	4.19306	4.21736	0.0400124	4.19401	0.0679236	0.0264869	6.57624	6.63332	6.5785
rs2812002	16793712		T	G	0.936765	0.934557	0.780117	40424	-0.0833049	0.0403967	4.25254	4.21734	0.0400128	4.25432	-0.0431051	0.0382547	1.26966	1.26254	1.26982
rs3739488	17395108		C	T	0.872237	0.876831	0.910775	40424	0.0567739	0.0277379	4.18938	4.21364	0.0401002	4.19032	0.0678998	0.0264893	6.57048	6.62749	6.57273
rs185915377	16709256		G	A	0.00196839	0.00247819	0.170804	40424	0.883924	0.424994	4.32578	4.21301	0.0401151	4.36649	0.956194	0.404046	5.60056	5.37746	5.67263
rs7027849	16873045		A	G	0.0813512	0.0793606	0.986682	40424	-0.0661057	0.0323372	4.17902	4.21069	0.04017	4.1804	-0.0635807	0.0310063	4.20486	4.24383	4.20619
rs1442533	17379146		A	G	0.569055	0.568715	0.862378	40424	0.0388539	0.018948	4.20478	4.20849	0.0402221	4.20525	0.0283324	0.0180455	2.46509	2.46689	2.46523
rs7870427	17396049		G	T	0.872251	0.876857	0.905961	40424	0.0568504	0.0278028	4.18108	4.20529	0.0402981	4.18203	0.068109	0.0265487	6.58149	6.63867	6.58375
rs188596499	17249371		G	A	0.00778401	0.00849626	0.272986	40424	0.379623	0.183015	4.30258	4.2013	0.040393	4.31696	0.378723	0.171786	4.86036	4.71421	4.87898
rs2253972	16800557		C	T	0.0630342	0.0652119	0.783513	40424	0.083076	0.0403763	4.23349	4.19853	0.040459	4.23526	0.0419769	0.0382436	1.20476	1.19817	1.2049
rs112820360	16500219		C	T	0.00121745	0.00100479	0.110023	40424	-1.76538	0.899127	3.85509	4.19591	0.0405216	3.93417	-1.86565	0.863337	4.66983	5.23042	4.74517
rs10962787	16978279		G	C	0.0476497	0.0507732	0.956686	40424	0.0844338	0.0410427	4.23214	4.19341	0.0405814	4.2343	0.072516	0.0390467	3.44905	3.41333	3.45047
rs10117448	16571394		G	A	0.0839554	0.0829807	0.451626	40424	-0.0979963	0.0481116	4.14876	4.19071	0.0406461	4.15058	-0.0832271	0.0453986	3.36081	3.39407	3.3619
rs118028898	17284788		T	C	0.0215756	0.0192179	0.759133	40424	-0.145612	0.0718355	4.10879	4.18613	0.040756	4.1138	-0.138335	0.0688136	4.04127	4.13038	4.04609
rs11523044	17259412		C	A	0.0191701	0.0187749	0.258324	40424	-0.258189	0.127458	4.10338	4.18286	0.0408347	4.11014	-0.156986	0.122229	1.64958	1.67296	1.65047
rs11523045	17259413		G	A	0.0191701	0.0187749	0.258324	40424	-0.258189	0.127458	4.10338	4.18286	0.0408347	4.11014	-0.156986	0.122229	1.64958	1.67296	1.65047
rs4436219	16894803		C	T	0.918428	0.920704	0.994	40424	0.0655935	0.0322005	4.1495	4.18102	0.0408791	4.15086	0.064383	0.0308567	4.35354	4.39481	4.35498
rs3808781	17393885		C	G	0.872195	0.876768	0.910873	40424	0.0565052	0.0277289	4.15251	4.17643	0.04099	4.15344	0.0676312	0.0264808	6.52276	6.57909	6.52497
rs9407774	16410956		G	C	0.275833	0.265448	0.972434	40424	-0.0407306	0.0199586	4.1647	4.17563	0.0410093	4.16524	-0.0434025	0.0190665	5.18189	5.20015	5.18267
rs4961537	17317041		T	G	0.855759	0.860447	0.876327	40424	0.0544521	0.0267192	4.15321	4.17511	0.0410219	4.15406	0.0617401	0.0255287	5.84893	5.89271	5.85056
rs201836166	16800556		TC	T	0.0629063	0.0650694	0.78318	40424	0.0829273	0.0404277	4.20764	4.17295	0.0410742	4.20938	0.0418509	0.03829	1.19464	1.18812	1.19478
rs7874945	17397549		A	G	0.872436	0.877044	0.907573	40424	0.0565733	0.0277882	4.14479	4.16872	0.0411769	4.14572	0.0678567	0.0265368	6.53867	6.59538	6.5409
rs10756763	16587490		C	T	0.918732	0.919849	0.447079	40424	0.0996588	0.0490715	4.12452	4.16719	0.0412141	4.12641	0.089981	0.0463592	3.7673	3.80826	3.76873
rs9298777	17390444		G	A	0.871464	0.875944	0.905888	40424	0.0564428	0.0277308	4.1428	4.16661	0.0412282	4.14372	0.0671622	0.0264837	6.43121	6.48628	6.43336
rs10962488	16565623		C	T	0.0836441	0.0826443	0.449943	40424	-0.0980357	0.0482823	4.12281	4.16444	0.0412811	4.12461	-0.0837148	0.0455564	3.37681	3.41038	3.37791
rs7034809	17267128		T	G	0.0644212	0.0619605	0.611117	40424	-0.0937882	0.0461842	4.1239	4.15787	0.0414415	4.12537	-0.0959269	0.0441973	4.71074	4.76043	4.71258
rs7018645	17267136		G	A	0.0644212	0.0619605	0.611117	40424	-0.0937882	0.0461842	4.1239	4.15787	0.0414415	4.12537	-0.0959269	0.0441973	4.71074	4.76043	4.71258
rs139768174	17232487		A	AGTTTT	0.132504	0.128494	0.909358	40424	-0.0553755	0.0272377	4.13327	4.15624	0.0414814	4.13416	-0.0607088	0.0260183	5.44437	5.48573	5.44585
rs10963081	17401063		G	A	0.870071	0.874473	0.894151	40424	0.0564251	0.0277569	4.13239	4.15605	0.041486	4.13331	0.0669285	0.0265067	6.37545	6.42962	6.37756
rs1339551	16854770		T	C	0.092547	0.10417	0.941509	40424	0.0606129	0.0296459	4.18022	4.15529	0.0415047	4.18139	0.0886342	0.0283171	9.79724	9.68839	9.80355
rs79827981	16687579		T	C	0.0236524	0.0217167	0.559825	40424	-0.163528	0.0810444	4.07135	4.1533	0.0415535	4.07586	-0.177483	0.0767853	5.34263	5.48577	5.35186
rs144831796	16937342		T	C	0.00100015	0.0006792	0.364917	40424	-1.06518	0.554738	3.68699	4.1441	0.0417799	3.79418	-1.17398	0.54926	4.5684	5.26901	4.7038
rs200214959	16565956		C	CA	0.0839769	0.0830104	0.449125	40424	-0.0976529	0.0482397	4.09789	4.13913	0.0419027	4.09967	-0.0830071	0.0455097	3.32677	3.35953	3.32784
rs10122728	16901470		A	G	0.979686	0.977598	0.212862	40424	-0.264463	0.129019	4.20164	4.13852	0.0419178	4.20772	-0.343221	0.121831	7.93657	7.74061	7.95868
rs2480924	16805472		G	A	0.0612505	0.0632034	0.752632	40424	0.0851955	0.0417258	4.16893	4.13415	0.0420262	4.1707	0.042248	0.0395251	1.14253	1.1363	1.14266
rs117123578	16989110		A	C	0.0132389	0.014406	0.552387	40424	0.203474	0.0991825	4.2087	4.13262	0.0420642	4.21631	0.184837	0.0942059	3.84963	3.76511	3.8563
rs10810618	16761648		C	T	0.90931	0.906628	0.800135	40424	-0.0688863	0.0337742	4.16001	4.13222	0.0420741	4.16125	-0.0478881	0.0319842	2.24174	2.22832	2.2421
rs2274916	17388125		C	T	0.0877124	0.0821619	0.923419	40424	-0.0663237	0.0327563	4.09966	4.13162	0.042089	4.10096	-0.0767218	0.0312501	6.02748	6.09577	6.03025
rs13297677	16777067		T	G	0.21645	0.227677	0.882757	40424	0.0454513	0.0223298	4.14308	4.13093	0.0421062	4.14368	0.0370824	0.0212985	3.03136	3.02201	3.03166
rs1934280	16862512		C	G	0.178259	0.178957	0.997302	40424	-0.0459175	0.022643	4.11235	4.12994	0.0421308	4.11304	-0.03242	0.0216871	2.23473	2.24308	2.23493
rs77148138	17204514		G	C	0.0196668	0.0211965	0.353829	40424	0.211257	0.103215	4.18926	4.12378	0.0422845	4.19504	0.162387	0.0975939	2.76859	2.72487	2.77103
rs144706759	17188029		T	C	0.00820081	0.00772491	0.249858	40424	-0.412614	0.206722	3.98396	4.12189	0.0423318	3.99381	-0.322624	0.194635	2.74759	2.83785	2.75366
rs190963707	17173180		C	A	0.00798407	0.00699604	0.700749	40424	-0.250827	0.125687	3.98264	4.12179	0.0423343	3.99716	-0.226662	0.119893	3.57411	3.71354	3.58581
rs2119907	17392152		C	T	0.872219	0.876763	0.91115	40424	0.0561015	0.0277256	4.09436	4.11777	0.042435	4.09527	0.0672997	0.0264779	6.4604	6.51591	6.46257
rs2119906	17392107		T	A	0.872219	0.876762	0.911163	40424	0.0560931	0.0277255	4.09316	4.11656	0.0424653	4.09407	0.067294	0.0264778	6.45935	6.51485	6.46153
rs4072453	16816211		A	G	0.254428	0.264466	0.681743	40424	0.0490612	0.0241543	4.12558	4.11537	0.0424952	4.12615	0.0434822	0.0229612	3.58621	3.57649	3.58659
rs75214735	16555833		C	CA	0.0844913	0.0834877	0.446703	40424	-0.0973557	0.0482328	4.07415	4.1148	0.0425096	4.07589	-0.0842704	0.045507	3.4292	3.4633	3.43033
rs1442525	17392055		G	A	0.87222	0.876762	0.911184	40424	0.0560761	0.0277254	4.09074	4.11412	0.0425266	4.09164	0.0672779	0.0264776	6.45634	6.5118	6.45851
rs28714603	16555980		A	G	0.0844923	0.0834889	0.446715	40424	-0.0973387	0.048232	4.07288	4.11351	0.042542	4.07462	-0.0842638	0.0455063	3.42878	3.46287	3.4299
rs2780213	17406381		T	C	0.91153	0.917083	0.89538	40424	0.0670023	0.0331657	4.08133	4.11309	0.0425525	4.08262	0.0769083	0.0316264	5.91353	5.97973	5.91619
rs142929074	16940730		A	C	0.0019882	0.00146046	0.594615	40424	-0.573307	0.294777	3.78258	4.11262	0.0425644	3.84079	-0.476623	0.282934	2.83779	3.07868	2.87163
rs28483319	16556051		G	A	0.0844924	0.0834896	0.446719	40424	-0.0973248	0.0482317	4.07176	4.11237	0.0425707	4.0735	-0.08425	0.0455059	3.42771	3.46178	3.42883
rs28602416	16556191		T	G	0.0844931	0.0834908	0.446728	40424	-0.0973018	0.048231	4.06996	4.11054	0.0426168	4.07169	-0.0842364	0.0455052	3.42671	3.46077	3.42783
rs4388546	16890849		T	A	0.918283	0.92028	0.969536	40424	0.0654231	0.0323947	4.07862	4.10942	0.042645	4.07995	0.0627753	0.0310349	4.09145	4.12904	4.09272
rs1442522	17391531		C	T	0.872069	0.876629	0.91282	40424	0.0559819	0.0276972	4.0853	4.1086	0.0426657	4.0862	0.0672751	0.0264506	6.469	6.52455	6.47118
rs28571854	16472947		C	T	0.0720437	0.0745933	0.834035	40424	0.0748419	0.0367847	4.13956	4.10838	0.0426712	4.14102	0.0524485	0.0349089	2.25733	2.24178	2.25776
rs57014573	16514918		T	C	0.0149026	0.0132568	0.409007	40424	-0.24531	0.122825	3.98895	4.10795	0.0426821	3.99834	-0.294839	0.11587	6.47484	6.75441	6.49954
rs10962592	16787039		G	A	0.0706831	0.0735057	0.772461	40424	0.0781493	0.038412	4.13921	4.10778	0.0426864	4.1407	0.051487	0.0364862	1.99131	1.97854	1.99164
rs182548763	16891699		A	G	0.00283722	0.00268649	0.208198	40424	-0.741881	0.375628	3.90079	4.1074	0.042696	3.92874	-0.367863	0.360177	1.04313	1.07504	1.04536
rs10962911	17218209		A	G	0.00429778	0.00563824	0.294616	40424	0.432962	0.211304	4.19842	4.10494	0.0427581	4.2328	0.606861	0.204724	8.78702	8.47426	8.93336
rs10962588	16782535		T	C	0.0723106	0.07518	0.779362	40424	0.0768505	0.0377899	4.13564	4.1046	0.0427667	4.13712	0.0532215	0.0359036	2.19734	2.18264	2.19774
rs9657595	17387062		A	T	0.911321	0.91675	0.930851	40424	0.0654367	0.0324288	4.07176	4.10305	0.0428059	4.07302	0.0751516	0.0309417	5.89916	5.96453	5.90178
rs75995512	16565954		A	AC	0.0841788	0.0832541	0.448736	40424	-0.097126	0.0481965	4.06106	4.10164	0.0428416	4.0628	-0.0821095	0.0454676	3.26124	3.29292	3.26226
rs1807023	16555289		G	A	0.0838136	0.0827894	0.448821	40424	-0.0973013	0.048298	4.05863	4.09913	0.0429053	4.06036	-0.0850672	0.0455829	3.48274	3.51785	3.48391
rs9298778	17390513		A	C	0.872185	0.876714	0.911045	40424	0.0559699	0.0277235	4.07579	4.09904	0.0429076	4.07669	0.0671649	0.0264763	6.43533	6.4905	6.43749
rs263627	17115403		T	C	0.284385	0.280714	0.941561	40424	-0.0403665	0.0199708	4.08555	4.09596	0.0429858	4.08607	-0.034074	0.0190546	3.19779	3.2063	3.19808
rs2026803	16800095		C	T	0.0634737	0.0656197	0.781845	40424	0.0818751	0.0403043	4.12668	4.09308	0.0430591	4.12835	0.040955	0.0381768	1.15084	1.1447	1.15097
rs138663853	16528975		C	T	0.00269637	0.00222551	0.277375	40424	-0.72289	0.37256	3.76488	4.08566	0.0432486	3.81711	-0.687774	0.35746	3.702	4.05902	3.75072
rs1442520	17388648		G	A	0.871965	0.876446	0.909171	40424	0.0558837	0.0277277	4.06203	4.08515	0.0432616	4.06292	0.0668749	0.0264792	6.37845	6.43286	6.38057
rs4961556	17390688		G	T	0.872236	0.876758	0.911426	40424	0.0558669	0.0277228	4.06102	4.08413	0.0432877	4.06191	0.0670692	0.0264754	6.41743	6.47237	6.41957
rs28584140	16786756		G	A	0.0706117	0.0733838	0.772047	40424	0.0779744	0.0384465	4.1133	4.0821	0.0433398	4.11477	0.0508694	0.0365175	1.9405	1.92819	1.94082
rs7859226	16430599		C	T	0.340807	0.333665	0.999492	40424	-0.0372434	0.0184565	4.07193	4.07919	0.0434145	4.07239	-0.0362146	0.0176566	4.20683	4.21592	4.20729
rs148707862	16883968		C	T	0.00677462	0.00795177	0.639328	40424	0.260993	0.127735	4.17481	4.07914	0.0434158	4.18716	0.226201	0.119492	3.58357	3.48705	3.5931
rs10120013	17389853		C	T	0.872219	0.876733	0.911262	40424	0.0558067	0.0277214	4.05267	4.07572	0.0435037	4.05356	0.066998	0.0264742	6.40439	6.45916	6.40653
rs10120006	17389800		C	T	0.872219	0.876733	0.911264	40424	0.0558053	0.0277213	4.0525	4.07554	0.0435084	4.05338	0.0669944	0.0264741	6.40376	6.45851	6.40589
rs35002638	17389584		TA	T	0.87222	0.876733	0.911251	40424	0.0558002	0.0277209	4.05188	4.07491	0.0435246	4.05277	0.0669856	0.0264738	6.40221	6.45695	6.40434
rs10738477	17389557		T	C	0.872221	0.876733	0.91125	40424	0.0557965	0.0277209	4.05136	4.07439	0.043538	4.05225	0.066982	0.0264738	6.40155	6.45628	6.40368
rs10119902	17389346		G	T	0.872222	0.876732	0.911256	40424	0.0557872	0.0277204	4.05013	4.07315	0.04357	4.05102	0.0669659	0.0264734	6.39864	6.45333	6.40077
rs10119863	17389344		C	T	0.872222	0.876732	0.911256	40424	0.0557865	0.0277204	4.05003	4.07304	0.0435728	4.05091	0.0669652	0.0264734	6.39852	6.45321	6.40065
rs10125886	17389083		A	T	0.872224	0.876732	0.911258	40424	0.055777	0.02772	4.04877	4.07178	0.0436053	4.04966	0.0669477	0.0264731	6.39532	6.44997	6.39745
rs1442521	17388710		T	A	0.872227	0.876734	0.911264	40424	0.0557723	0.0277195	4.04826	4.07126	0.0436187	4.04914	0.0669336	0.0264727	6.39284	6.44745	6.39497
rs5896720	16890387		A	AT	0.916499	0.918483	0.949378	40424	0.0652126	0.0324433	4.04029	4.07055	0.0436371	4.04159	0.0619923	0.0310745	3.97985	4.01576	3.98105
rs1930648	17388517		C	T	0.872228	0.876733	0.91126	40424	0.0557505	0.027719	4.04522	4.06819	0.0436981	4.0461	0.0669131	0.0264723	6.38911	6.44367	6.39124
rs149437488	17102393		C	A	0.00154597	0.00122736	0.197582	40424	-1.10744	0.565296	3.83787	4.06495	0.043782	3.87721	-1.15647	0.545236	4.49886	4.84669	4.54214
rs76884008	16974014		T	C	0.0471264	0.0428538	0.722403	40424	-0.100137	0.0499626	4.01696	4.06458	0.0437916	4.01942	-0.110296	0.0479895	5.28232	5.3701	5.28643
rs192583298	17092990		C	A	0.00217941	0.00158979	0.654867	40424	-0.51824	0.266989	3.76768	4.06187	0.0438619	3.8177	-0.47135	0.257682	3.34595	3.62932	3.38579
rs7025366	16508651		G	C	0.0170649	0.0155221	0.392967	40424	-0.230384	0.115839	3.95544	4.0616	0.0438689	3.96343	-0.261965	0.109207	5.75425	5.96507	5.77089
rs28414647	16556852		A	C	0.0857407	0.0847767	0.442279	40424	-0.0965367	0.0481472	4.02015	4.05975	0.043917	4.02183	-0.0808391	0.045394	3.17136	3.20135	3.17231
rs10810626	16785770		A	T	0.0702939	0.0730177	0.765851	40424	0.0781702	0.0386899	4.08212	4.05125	0.0441387	4.08357	0.0506451	0.0367382	1.90037	1.88843	1.90068
rs149669087	17197650		T	C	0.000758603	0.000600075	0.133176	40424	-1.99988	1.07488	3.46168	4.04708	0.0442478	3.65976	-2.0958	1.09066	3.69246	4.41803	3.79906
rs188455589	17026568		T	G	0.0013192	0.0010616	0.155452	40424	-1.42904	0.743655	3.69271	4.0447	0.0443103	3.74212	-1.33026	0.706115	3.54912	3.95867	3.59715
rs7869815	16496446		T	C	0.0163997	0.0149001	0.387322	40424	-0.23568	0.118814	3.93471	4.04157	0.0443925	3.94297	-0.262644	0.112223	5.47738	5.67888	5.49319
rs1337398	16706025		C	G	0.938316	0.934189	0.701304	40424	-0.0855485	0.0423773	4.07529	4.04126	0.0444007	4.07692	-0.0891245	0.0401723	4.92199	4.86792	4.92442
rs189812676	16591062		A	G	0.00106503	0.000798346	0.221368	40424	-1.47465	0.808665	3.32536	4.04089	0.0444104	3.48972	-1.77592	0.758675	5.47944	6.97004	5.79819
rs145463371	17091389		A	G	0.0928231	0.085599	0.889027	40424	-0.0656294	0.0327876	4.00663	4.03675	0.0445195	4.00782	-0.0805968	0.031219	6.66495	6.74246	6.6682
rs148417185	16825139		C	T	0.0013787	0.00169072	0.123226	40424	1.22182	0.598715	4.16461	4.03585	0.0445432	4.20607	1.76899	0.574042	9.49644	8.96778	9.70233
rs117756613	16828091		T	C	0.0065497	0.00533865	0.436698	40424	-0.363116	0.184728	3.86387	4.03416	0.0445879	3.8819	-0.42189	0.175997	5.74627	6.1195	5.78789
rs183692729	16687316		C	A	0.000948094	0.000783192	0.197449	40424	-1.43393	0.761558	3.5453	4.03222	0.0446392	3.66008	-1.24105	0.740835	2.80632	3.18374	2.86769
rs56873701	16519556		T	C	0.0152142	0.0136485	0.410794	40424	-0.238347	0.12044	3.91632	4.02757	0.0447624	3.92527	-0.28986	0.11382	6.48544	6.75476	6.50952
rs78191851	16511091		T	A	0.0149212	0.0133086	0.403314	40424	-0.243935	0.123398	3.90777	4.02239	0.0449	3.91676	-0.291175	0.116319	6.26626	6.5304	6.28928
rs144874310	16656342		T	C	0.0204054	0.0190004	0.375753	40424	-0.213501	0.107851	3.91884	4.01716	0.0450395	3.92563	-0.209843	0.101596	4.2662	4.39038	4.27442
rs10963020	17306423		G	A	0.00352306	0.00480562	0.358811	40424	0.42611	0.210294	4.10572	4.01535	0.0450879	4.13749	0.578315	0.20415	8.0247	7.74371	8.14382
rs142977652	16924574		C	T	0.000726312	0.00102946	0.282019	40424	1.10593	0.54304	4.14758	4.01527	0.04509	4.29139	1.07678	0.490213	4.82485	4.54118	5.02588
rs140113643	16881918		T	G	0.0026304	0.00227732	0.198886	40424	-0.819993	0.417761	3.85269	4.01453	0.0451098	3.8731	-0.76282	0.396858	3.69465	3.87505	3.71142
rs1930592	17198428		G	A	0.15761	0.152633	0.895506	40424	-0.0509363	0.0254901	3.9931	4.01236	0.0451679	3.99383	-0.0582017	0.0243034	5.73504	5.77476	5.73648
rs1442518	17387675		C	T	0.872315	0.876737	0.912168	40424	0.0553002	0.0276957	3.98685	4.0093	0.0452499	3.98771	0.0661617	0.0264522	6.2559	6.30871	6.25793
rs186893281	16670897		C	T	0.00120587	0.000923922	0.120326	40424	-1.66326	0.858444	3.75401	4.00926	0.045251	3.78125	-2.14031	0.818853	6.8319	7.50961	6.93567
rs150672328	17232482		T	TGTTAA	0.132081	0.128048	0.911629	40424	-0.0543827	0.0272372	3.98656	4.00832	0.0452762	3.98738	-0.0607873	0.0260217	5.45699	5.49855	5.45848
rs10962683	16909007		G	C	0.0364867	0.0346624	0.937126	40424	-0.0961957	0.0483681	3.95543	4.00539	0.045355	3.95824	-0.0959424	0.0465757	4.24329	4.30971	4.24636
rs151301851	17100717		A	G	0.0109389	0.0120582	0.292573	40424	0.300007	0.148656	4.07284	4.00266	0.0454285	4.08115	0.350939	0.14025	6.26119	6.09761	6.28035
rs2382810	16554165		C	T	0.0832042	0.0822562	0.450898	40424	-0.0961786	0.0483206	3.9618	4.00099	0.0454735	3.96346	-0.0825888	0.0456029	3.27987	3.31206	3.28091
rs12338548	16564464		C	T	0.0834988	0.0825478	0.450868	40424	-0.0960481	0.0482632	3.96046	3.99965	0.0455097	3.96212	-0.0825709	0.0455412	3.28735	3.31961	3.28839
rs6475059	16554405		G	A	0.0832083	0.0822639	0.450982	40424	-0.0961272	0.0483132	3.95877	3.9979	0.045557	3.96043	-0.0824642	0.0455973	3.27079	3.30284	3.27182
rs2382808	16553888		T	A	0.083201	0.0822544	0.450847	40424	-0.0961351	0.0483232	3.9578	3.99693	0.0455832	3.95946	-0.0825421	0.0456052	3.27584	3.30797	3.27688
rs75440556	16975118		T	C	0.0479281	0.0509251	0.965442	40424	0.0819125	0.0408166	4.02743	3.99135	0.0457344	4.02938	0.0688713	0.0388241	3.14684	3.11566	3.14802
rs12000225	16559218		G	A	0.0265393	0.0253201	0.397011	40424	-0.179459	0.0907385	3.91153	3.99006	0.0457694	3.91631	-0.148374	0.0854061	3.01812	3.07695	3.02101
rs7027292	17387242		C	T	0.87211	0.876461	0.911219	40424	0.0551481	0.027689	3.96687	3.98914	0.0457944	3.96772	0.065671	0.0264452	6.16674	6.21839	6.16872
rs56679915	16503894		T	C	0.0163141	0.0147924	0.391192	40424	-0.234104	0.118798	3.88329	3.98855	0.0458105	3.89131	-0.262127	0.112028	5.47484	5.67574	5.49061
rs10810703	16996034		C	T	0.641671	0.645445	0.989392	40424	0.0365598	0.0183276	3.97923	3.98542	0.0458957	3.97967	0.0332623	0.0175009	3.61229	3.61859	3.61262
rs140425749	16829871		C	G	0.0219398	0.0234942	0.395758	40424	0.186244	0.0925233	4.05191	3.98386	0.0459382	4.05746	0.137694	0.0871885	2.49408	2.45633	2.49631
rs10117379	17386640		G	A	0.872117	0.876461	0.911434	40424	0.0551032	0.0276861	3.96124	3.98346	0.0459491	3.96208	0.065597	0.0264425	6.1541	6.20558	6.15607
rs7023540	17386524		G	A	0.872119	0.876461	0.911485	40424	0.055092	0.0276853	3.95983	3.98204	0.0459878	3.96068	0.0655834	0.0264418	6.15185	6.2033	6.15382
rs10962863	17091001		C	T	0.0936683	0.086445	0.881706	40424	-0.0651869	0.0327884	3.95257	3.98199	0.0459892	3.95372	-0.0808811	0.031223	6.71035	6.78848	6.71363
rs7023305	17386513		C	T	0.872119	0.876461	0.911487	40424	0.05509	0.0276853	3.95957	3.98177	0.0459952	3.96041	0.0655816	0.0264417	6.15154	6.20299	6.15351
rs6475060	16557748		C	T	0.0843027	0.083433	0.447682	40424	-0.0956875	0.0481903	3.94267	3.98134	0.0460069	3.9443	-0.0803002	0.0454652	3.11942	3.14897	3.12036
rs10810614	16759311		T	G	0.0713248	0.0746279	0.701319	40424	0.0800756	0.0399776	4.01205	3.98131	0.0460078	4.0135	0.0579176	0.037927	2.33197	2.31554	2.33245
rs76905684	16974891		C	T	0.0479244	0.0509148	0.96592	40424	0.0817896	0.040814	4.01585	3.97992	0.0460458	4.01779	0.0687456	0.0388208	3.13589	3.10488	3.13707
rs1927616	16563321		G	A	0.0834606	0.0825183	0.450686	40424	-0.0958325	0.0482771	3.94044	3.97932	0.0460622	3.94208	-0.0823029	0.0455552	3.26403	3.29595	3.26506
rs12380368	17099661		C	T	0.00673256	0.00508429	0.667691	40424	-0.286827	0.146662	3.82477	3.96847	0.0463599	3.83951	-0.353891	0.141094	6.29108	6.66831	6.33249
rs943744	16563907		A	T	0.0839331	0.0830342	0.449101	40424	-0.0955808	0.0482368	3.92631	3.96491	0.046458	3.92794	-0.081652	0.045508	3.21927	3.2504	3.22027
rs10122901	16808172		C	G	0.0896255	0.0939192	0.701111	40424	0.0718035	0.0359432	3.99078	3.9647	0.0464638	3.99195	0.0594121	0.0341893	3.01974	2.99899	3.02038
rs10120733	17383044		A	G	0.871969	0.876333	0.916747	40424	0.0547602	0.0275784	3.94269	3.96468	0.0464644	3.94352	0.0649443	0.0263445	6.07719	6.12757	6.07911
rs4265285	16977992		G	T	0.52282	0.53319	0.940534	40424	0.0357532	0.0179678	3.95952	3.96113	0.0465624	3.95992	0.0321068	0.017136	3.51057	3.51202	3.51086
rs2039185	16784004		G	C	0.070881	0.0735314	0.757247	40424	0.0774205	0.0387566	3.99044	3.96068	0.0465749	3.99183	0.0494625	0.0368043	1.80616	1.79511	1.80643
rs145906938	17009610		G	A	0.000702459	0.00102925	0.284943	40424	1.09369	0.542092	4.07044	3.95589	0.0467076	4.21708	1.20647	0.490326	6.05426	5.70359	6.38308
rs191297907	17305295		A	T	0.00266066	0.00197948	0.433303	40424	-0.567628	0.296882	3.65562	3.94709	0.0469525	3.70655	-0.611626	0.293067	4.3555	4.80335	4.42575
rs1930647	17383905		A	G	0.871887	0.876236	0.916256	40424	0.0546073	0.0275764	3.92127	3.94307	0.0470648	3.92209	0.0647906	0.0263423	6.04945	6.09946	6.05135
rs117565641	17171228		G	T	0.00742693	0.00643101	0.747059	40424	-0.24654	0.12632	3.80918	3.94055	0.0471354	3.82272	-0.225825	0.120533	3.51018	3.64742	3.52171
rs10738452	16717273		T	G	0.282912	0.29359	0.740723	40424	0.0443239	0.022325	3.94178	3.93334	0.0473378	3.94227	0.0341012	0.02123	2.58013	2.57464	2.58032
rs10963062	17354763		G	A	0.00341391	0.00466485	0.354472	40424	0.430361	0.2146	4.02168	3.93262	0.0473581	4.05347	0.589045	0.208162	8.00745	7.72528	8.13151
rs9407777	16799466		C	G	0.0634931	0.0655568	0.783228	40424	0.0801627	0.0402754	3.96154	3.92987	0.0474356	3.96307	0.039866	0.0381472	1.09215	1.08646	1.09226
rs190043620	16482119		C	T	0.000543346	0.000437814	0.13873	40424	-2.39609	1.34535	3.17201	3.92857	0.0474723	3.37257	-2.11397	1.29327	2.67188	3.28404	2.78336
rs35656943	16870182		TC	T	0.0778978	0.0764077	0.890861	40424	-0.06747	0.0341798	3.89657	3.92578	0.0475511	3.89784	-0.0607401	0.0327618	3.43729	3.46671	3.43823
rs10448195	17154345		A	T	0.217499	0.216242	0.858857	40424	-0.0451252	0.0228156	3.91177	3.92551	0.0475588	3.91234	-0.0285658	0.0217881	1.71891	1.72365	1.71902
rs10120761	17383194		A	T	0.871797	0.876115	0.91568	40424	0.0544779	0.0275741	3.90337	3.92501	0.0475729	3.90418	0.0646287	0.0263399	6.02036	6.06999	6.02224
rs4961530	17188041		T	A	0.157937	0.15284	0.898847	40424	-0.0502801	0.0254477	3.90385	3.92247	0.0476448	3.90455	-0.0583298	0.0242624	5.7798	5.81998	5.78127
rs10962545	16701680		C	A	0.070169	0.0736131	0.616186	40424	0.085578	0.0430393	3.95362	3.92143	0.0476743	3.95508	0.0683701	0.0407235	2.81866	2.79601	2.81941
rs7025065	16508415		G	C	0.0163154	0.0147639	0.395335	40424	-0.231346	0.11841	3.81724	3.92067	0.0476959	3.82498	-0.262818	0.111518	5.55419	5.7595	5.57044
rs28593297	16558861		A	G	0.0837886	0.0829114	0.449509	40424	-0.0950109	0.0482221	3.882	3.91986	0.0477189	3.88359	-0.0800228	0.0455006	3.0931	3.12239	3.09402
rs4097851	17383698		T	C	0.910883	0.916251	0.934991	40424	0.0636189	0.0322579	3.88955	3.91859	0.0477549	3.89069	0.0731306	0.0307829	5.6439	5.70474	5.64628
rs5896741	17388822		TA	T	0.871487	0.875913	0.906105	40424	0.0547195	0.0277299	3.89393	3.91555	0.0478414	3.89474	0.0660698	0.0264819	6.22454	6.27686	6.22655
rs10511626	16764989		G	T	0.115197	0.122178	0.795085	40424	0.0600597	0.0302898	3.93163	3.91103	0.0479702	3.93252	0.0513244	0.0288802	3.15826	3.14023	3.15881
rs443662	17117203		A	G	0.284119	0.280627	0.942688	40424	-0.0394239	0.0199622	3.90034	3.91004	0.0479985	3.90081	-0.0330094	0.0190463	3.00368	3.01143	3.00393
rs117516851	17140544		C	T	0.00147103	0.0012939	0.453252	40424	-0.682176	0.362691	3.53769	3.90678	0.0480917	3.63239	-0.393912	0.360356	1.19491	1.27101	1.20303
rs113450918	16952080		A	G	0.0174324	0.0200764	0.815033	40424	0.139805	0.0702546	3.96001	3.90424	0.0481644	3.96466	0.14639	0.0670166	4.77152	4.67963	4.77828
rs186856396	17040738		C	T	0.000527332	0.000326033	0.30271	40424	-1.84008	1.04108	3.12393	3.90162	0.0482396	3.30342	-2.00445	0.992529	4.07854	5.3623	4.39701
rs7028433	17320748		A	G	0.987305	0.988126	0.198603	40424	0.358202	0.183776	3.79909	3.89987	0.0482898	3.80853	0.395466	0.176307	5.03128	5.21282	5.04642
rs35386000	16880946		C	G	0.0823025	0.0801827	0.99742	40424	-0.0625091	0.0317867	3.86719	3.89584	0.0484058	3.8684	-0.0618005	0.0304494	4.11933	4.15769	4.12065
rs10733312	16589140		G	A	0.931355	0.932554	0.47333	40424	0.101311	0.0516136	3.85287	3.89431	0.0484499	3.85469	0.0987623	0.0488572	4.08626	4.13699	4.08819
rs7023455	16845903		T	G	0.0285433	0.0265828	0.856374	40424	-0.113596	0.0579991	3.83603	3.89416	0.0484543	3.8394	-0.128426	0.055659	5.32397	5.43776	5.33037
rs10962922	17234883		T	C	0.130973	0.127	0.938844	40424	-0.0529321	0.0269245	3.86492	3.88563	0.048701	3.8657	-0.0599522	0.0257266	5.43058	5.47176	5.43206
rs12004542	16975043		T	C	0.0490377	0.0520789	0.950776	40424	0.0805953	0.0407123	3.91893	3.88443	0.0487358	3.92076	0.0689332	0.0387209	3.16932	3.13798	3.17051
rs61195732	17020796		C	T	0.00112047	0.00181599	0.635503	40424	0.545071	0.272456	4.00233	3.88403	0.0487474	4.06026	0.601602	0.258762	5.40527	5.15123	5.51537
rs141646435	16690946		TC	T	0.0232954	0.0213498	0.559696	40424	-0.159301	0.0816868	3.80307	3.87716	0.0489473	3.80697	-0.179023	0.0773729	5.35355	5.49698	5.36279
rs2382809	16554116		A	T	0.0829235	0.0819956	0.451191	40424	-0.094731	0.0483699	3.83561	3.87299	0.049069	3.83717	-0.0815794	0.0456487	3.19377	3.22477	3.19477
rs10963043	17342943		C	T	0.00334122	0.00456549	0.355489	40424	0.431324	0.216729	3.96069	3.8726	0.0490804	3.99165	0.591045	0.210181	7.90778	7.62488	8.02942
rs117228620	16940763		A	G	0.0417495	0.0444071	0.646668	40424	0.104311	0.0527504	3.91028	3.87003	0.0491556	3.91269	0.105053	0.0503182	4.35879	4.30024	4.36176
rs1927618	16572826		A	C	0.109114	0.108802	0.442692	40424	-0.0843159	0.0430454	3.83678	3.86817	0.0492101	3.83805	-0.0625905	0.0405272	2.38519	2.40126	2.38561
rs3814139	17236376		A	G	0.130432	0.126385	0.948477	40424	-0.052693	0.0268635	3.84751	3.86808	0.0492128	3.84828	-0.0600693	0.0256682	5.47663	5.51833	5.47813
rs7861345	16559216		T	C	0.0837311	0.0828712	0.44961	40424	-0.0943536	0.0482269	3.82771	3.86478	0.0493097	3.82925	-0.0794939	0.0455047	3.0518	3.08051	3.05269
rs12345489	16520074		C	T	0.0175066	0.0159815	0.389674	40424	-0.22255	0.114666	3.7669	3.86346	0.0493485	3.77389	-0.254607	0.108032	5.55443	5.74886	5.56928
rs10810705	17004418		T	C	0.319296	0.326524	0.989265	40424	0.0370097	0.0188165	3.86857	3.86237	0.0493805	3.869	0.0364256	0.017937	4.12395	4.11559	4.1244
rs147978844	16506729		G	C	0.00145406	0.00170363	0.133819	40424	1.15559	0.578571	3.98929	3.86207	0.0493894	4.05248	0.995183	0.547527	3.30365	3.21243	3.34886
rs10963085	17404916		A	G	0.0876564	0.0819255	0.911206	40424	-0.064631	0.0330147	3.83236	3.8615	0.0494061	3.83351	-0.0757462	0.0314887	5.78646	5.85122	5.78905
rs10962846	17061378		G	A	0.00672802	0.0050736	0.677463	40424	-0.280989	0.145629	3.7229	3.86059	0.0494329	3.73684	-0.350137	0.140097	6.24626	6.61833	6.28691
rs7021738	17234199		T	A	0.131096	0.127179	0.930235	40424	-0.0529552	0.0270274	3.8389	3.85949	0.0494654	3.83967	-0.0593662	0.0258233	5.28513	5.32482	5.28654
rs10116912	16896505		G	A	0.961126	0.963136	0.972074	40424	0.0903621	0.0462814	3.81206	3.85736	0.0495282	3.81442	0.0965125	0.0444243	4.71982	4.79423	4.72331
rs2383006	16758324		G	A	0.920437	0.918153	0.825391	40424	-0.0694211	0.0352243	3.88416	3.85704	0.0495377	3.88535	-0.0496803	0.033365	2.2171	2.20281	2.21749
rs6475114	17196203		A	G	0.157104	0.152164	0.898073	40424	-0.0498911	0.0254774	3.83474	3.85289	0.0496604	3.83542	-0.0575521	0.0242916	5.6132	5.65174	5.61459
rs6475115	17196533		T	A	0.157092	0.152154	0.897945	40424	-0.0498941	0.0254794	3.83461	3.85276	0.0496642	3.83529	-0.0575386	0.0242936	5.60967	5.64816	5.61105
rs2029247	17117875		T	C	0.282285	0.278658	0.944229	40424	-0.0391529	0.0199817	3.8394	3.84897	0.0497765	3.83986	-0.0335459	0.0190645	3.09619	3.10439	3.09646
rs3814138	17236365		C	T	0.130885	0.126821	0.94406	40424	-0.0525828	0.0268764	3.82776	3.84815	0.0498009	3.82852	-0.0603749	0.0256821	5.52653	5.5688	5.52806
rs114106578	17177854		T	C	0.00664255	0.00559857	0.821212	40424	-0.246356	0.127792	3.71639	3.84507	0.0498924	3.72963	-0.232989	0.122076	3.64259	3.79064	3.65537
rs189685342	17176408		A	G	0.00664291	0.00559912	0.821296	40424	-0.246319	0.12778	3.71599	3.84464	0.0499052	3.72922	-0.232913	0.122065	3.64088	3.78882	3.65365
rs12351269	16806521		T	C	0.0889439	0.0934097	0.718115	40424	0.0700456	0.0356237	3.86619	3.84135	0.0500032	3.86728	0.0594926	0.0338765	3.0841	3.06276	3.08477
rs10733336	16992325		C	G	0.642514	0.646127	0.984879	40424	0.035943	0.0183553	3.83449	3.84037	0.0500325	3.83489	0.0326276	0.0175286	3.4648	3.47075	3.4651
rs190642472	17258540		G	A	0.240761	0.23988	0.804721	40424	-0.0445444	0.0227655	3.82851	3.84002	0.0500429	3.82901	-0.0253933	0.021723	1.36646	1.36932	1.36652
rs181914139	17174817		G	C	0.00664296	0.00559982	0.821414	40424	-0.246134	0.127768	3.71107	3.83944	0.0500602	3.72426	-0.232734	0.122053	3.636	3.78363	3.64874
rs189360802	17173688		A	G	0.00664301	0.00560015	0.821526	40424	-0.24607	0.12776	3.70959	3.83788	0.0501068	3.72278	-0.23265	0.122045	3.63382	3.78131	3.64655
rs184349332	17173478		A	G	0.00664307	0.0056003	0.821541	40424	-0.246051	0.127758	3.70916	3.83743	0.0501203	3.72235	-0.232629	0.122043	3.63328	3.78074	3.646
rs10119233	17388999		G	A	0.873203	0.877895	0.907132	40424	0.0544535	0.0278757	3.81591	3.8371	0.0501302	3.8167	0.0660117	0.0266192	6.14967	6.20158	6.15166
rs75694394	17112199		T	C	0.000906972	0.00103834	0.139727	40424	1.35903	0.68525	3.93332	3.83405	0.0502214	4.21143	0.820206	0.660596	1.54161	1.46802	1.57754
rs190111655	17163403		G	C	0.00806558	0.00667493	0.596645	40424	-0.264727	0.137595	3.70164	3.83352	0.0502373	3.71542	-0.331015	0.132463	6.2446	6.59858	6.28398
rs34586990	17165040		G	A	0.228568	0.230926	0.836897	40424	0.0442647	0.0225835	3.84178	3.83072	0.0503213	3.84231	0.0307943	0.0214509	2.06088	2.0555	2.06102
rs184212398	17153772		G	A	0.006657	0.00561969	0.820972	40424	-0.24554	0.127603	3.70273	3.83054	0.0503267	3.71586	-0.230971	0.121878	3.59139	3.73615	3.60382
rs13299180	16735405		A	C	0.504596	0.495768	0.552143	40424	-0.0457766	0.0233969	3.828	3.82685	0.0504376	3.82839	-0.033949	0.0223054	2.3165	2.31572	2.31663
rs7047093	17379933		A	G	0.871126	0.875312	0.92438	40424	0.0534019	0.0273745	3.80559	3.82629	0.0504545	3.80637	0.0627234	0.0261529	5.75201	5.79804	5.75371
rs4147023	17233403		T	C	0.130506	0.126545	0.933671	40424	-0.0526945	0.0270327	3.79972	3.82	0.0506442	3.80047	-0.0595256	0.0258274	5.31186	5.35189	5.31329
rs189738699	17180828		C	T	0.00663038	0.00559052	0.82241	40424	-0.24548	0.127796	3.68976	3.81699	0.0507353	3.70281	-0.232001	0.12207	3.6121	3.7582	3.62467
rs186551034	17187726		A	G	0.00664181	0.00560379	0.82073	40424	-0.245467	0.127794	3.6895	3.81667	0.050745	3.70254	-0.231821	0.12207	3.60655	3.75228	3.61908
rs1372700	17401525		G	A	0.870822	0.875344	0.890399	40424	0.05433	0.0278871	3.79554	3.81647	0.0507511	3.79633	0.065561	0.0266314	6.06044	6.11093	6.06236
rs7045418	16910872		A	T	0.0394208	0.0378844	0.884174	40424	-0.0932881	0.0480558	3.76844	3.81396	0.0508271	3.77091	-0.0912907	0.046229	3.89964	3.95688	3.90216
rs62558294	17222525		G	A	0.0244411	0.022364	0.731293	40424	-0.132617	0.0684686	3.75157	3.81371	0.0508347	3.75534	-0.101656	0.0654602	2.41163	2.44977	2.41317
rs191743096	17176474		A	T	0.00663092	0.00559198	0.822537	40424	-0.245242	0.127763	3.68451	3.81142	0.0509043	3.69751	-0.231729	0.122039	3.60545	3.75112	3.61798
rs3814137	17235563		C	A	0.130401	0.126398	0.946972	40424	-0.0523237	0.0268754	3.79043	3.81053	0.0509313	3.79117	-0.0596809	0.0256792	5.40141	5.44226	5.40287
rs183174902	17175899		A	G	0.00663098	0.00559224	0.822589	40424	-0.245166	0.127758	3.68254	3.80935	0.0509672	3.69553	-0.231666	0.122034	3.60381	3.74937	3.61632
rs184281609	17189624		G	C	0.00664101	0.0056045	0.820672	40424	-0.245163	0.127792	3.68045	3.80711	0.0510354	3.69342	-0.23152	0.122068	3.59726	3.7424	3.60972
rs72717008	16451112		A	G	0.00658101	0.00541327	0.429027	40424	-0.353522	0.18529	3.64024	3.8038	0.0511364	3.65622	-0.407987	0.176351	5.35227	5.69017	5.39053
rs16935195	16961911		A	G	0.21338	0.219176	0.958835	40424	0.042031	0.0215261	3.8125	3.8012	0.0512159	3.81302	0.0426945	0.0205818	4.30304	4.28615	4.30367
rs181031289	17160631		C	G	0.00664489	0.0056072	0.822311	40424	-0.244554	0.127609	3.6727	3.79889	0.0512866	3.68561	-0.231064	0.121908	3.59255	3.73739	3.60499
rs10121347	16806694		G	C	0.0884512	0.0928052	0.71957	40424	0.0697688	0.0356854	3.82244	3.79791	0.0513166	3.82351	0.0588225	0.0339341	3.00479	2.98419	3.00543
rs57517034	16512844		TGA	T	0.0161544	0.014593	0.396928	40424	-0.22854	0.118863	3.69687	3.79672	0.0513531	3.70426	-0.265804	0.111968	5.63551	5.84787	5.65255
rs7874842	16476971		G	A	0.181737	0.172392	0.780337	40424	-0.0504956	0.0259733	3.77966	3.79657	0.0513577	3.78031	-0.0617742	0.0247269	6.2413	6.28397	6.24292
rs10963054	17347036		T	C	0.00338688	0.00462265	0.35739	40424	0.423062	0.214726	3.88183	3.79636	0.0513641	3.91147	0.581198	0.208293	7.7857	7.51195	7.90312
rs144411197	17178544		C	G	0.0071842	0.00619253	0.770846	40424	-0.242144	0.126369	3.67169	3.79605	0.0513736	3.68433	-0.222741	0.120581	3.41226	3.54395	3.42321
rs114638020	17178546		A	G	0.0071842	0.00619253	0.770846	40424	-0.242144	0.126369	3.67169	3.79605	0.0513736	3.68433	-0.222741	0.120581	3.41226	3.54395	3.42321
rs115432482	17178733		C	T	0.00718392	0.00619245	0.770858	40424	-0.242096	0.12637	3.67014	3.79442	0.0514237	3.68277	-0.222707	0.120582	3.41117	3.54279	3.42212
rs149847375	17178271		G	A	0.00718428	0.00619305	0.770842	40424	-0.242053	0.126365	3.6692	3.79343	0.0514541	3.68183	-0.222646	0.120576	3.40961	3.54113	3.42054
rs183543537	17185376		G	T	0.00663032	0.0055958	0.822112	40424	-0.244662	0.127773	3.66652	3.79243	0.0514849	3.6794	-0.230866	0.12204	3.57859	3.72255	3.59093
rs187541393	17147520		G	C	0.00665035	0.0056167	0.822111	40424	-0.244226	0.127544	3.66659	3.79241	0.0514855	3.67946	-0.229653	0.121818	3.55402	3.6964	3.56619
rs190038726	17306200		T	C	0.0034646	0.00305299	0.513879	40424	-0.417126	0.219002	3.62776	3.79207	0.0514959	3.64905	-0.369226	0.210775	3.06864	3.21793	3.08473
rs114941103	17179883		C	A	0.00714412	0.00614803	0.773304	40424	-0.242404	0.126573	3.6677	3.79201	0.0514978	3.68034	-0.223622	0.120779	3.42807	3.5609	3.43915
rs191549881	17154514		C	T	0.00664708	0.00561183	0.822055	40424	-0.244266	0.127579	3.66581	3.7916	0.0515104	3.67867	-0.230282	0.121866	3.5707	3.71414	3.58298
rs186434632	17155391		C	T	0.00664663	0.00561099	0.822083	40424	-0.244271	0.127586	3.66556	3.79135	0.0515181	3.67842	-0.230405	0.121874	3.57406	3.71772	3.58637
rs182048197	17155346		C	G	0.00664664	0.00561104	0.822085	40424	-0.244268	0.127585	3.6655	3.79129	0.0515199	3.67836	-0.230393	0.121873	3.57374	3.71738	3.58605
rs193056958	17155032		C	G	0.00664677	0.0056113	0.822076	40424	-0.244262	0.127583	3.66548	3.79126	0.0515209	3.67834	-0.230355	0.121871	3.5727	3.71627	3.585
rs180736283	17157317		T	C	0.00664582	0.00560965	0.822139	40424	-0.244278	0.127595	3.6652	3.79098	0.0515295	3.67806	-0.230607	0.121887	3.57954	3.72355	3.59188
rs60401056	17179982		C	T	0.0071441	0.00614814	0.773301	40424	-0.242368	0.126573	3.66663	3.79088	0.0515325	3.67926	-0.223596	0.120778	3.42731	3.56009	3.43838
rs151304177	17177276		A	G	0.00718478	0.00619401	0.770851	40424	-0.241951	0.126357	3.66656	3.79063	0.0515402	3.67916	-0.222537	0.120568	3.40676	3.5381	3.41767
rs188937912	17153654		A	G	0.00664748	0.00561261	0.822057	40424	-0.24422	0.127572	3.66478	3.79051	0.0515439	3.67764	-0.230167	0.121858	3.56761	3.71085	3.57987
rs115452285	17176114		T	C	0.00718547	0.00619485	0.770845	40424	-0.241926	0.12635	3.66616	3.79021	0.0515532	3.67877	-0.222476	0.120561	3.40527	3.53652	3.41618
rs201849889	17175723		A	ATTGGCATGT	0.00718557	0.00619502	0.770853	40424	-0.241917	0.126348	3.66602	3.79006	0.0515578	3.67862	-0.222461	0.12056	3.40489	3.53612	3.41579
rs180674853	17152319		A	G	0.00664813	0.00561369	0.822079	40424	-0.244174	0.127561	3.66403	3.78972	0.0515683	3.67688	-0.23	0.121845	3.56319	3.70616	3.57542
rs75640801	17299387		T	A	0.00325152	0.00448746	0.374166	40424	0.420464	0.213591	3.87519	3.78971	0.0515686	3.905	0.577643	0.207351	7.76083	7.48719	7.87843
rs184486494	17145355		C	T	0.00665093	0.00561755	0.822174	40424	-0.2441	0.127525	3.66391	3.78957	0.0515729	3.67675	-0.229516	0.121801	3.55082	3.69299	3.56296
rs187831301	17146488		A	T	0.00665056	0.00561732	0.822132	40424	-0.244115	0.127534	3.66387	3.78953	0.0515741	3.67671	-0.229529	0.121808	3.55075	3.69291	3.56289
rs180736085	17145351		C	T	0.0066509	0.00561755	0.822173	40424	-0.244098	0.127525	3.66384	3.7895	0.0515751	3.67668	-0.229513	0.121801	3.55069	3.69285	3.56283
rs192286700	17150821		C	T	0.00664894	0.00561513	0.822086	40424	-0.24414	0.12755	3.66366	3.78931	0.0515809	3.6765	-0.229811	0.121832	3.55809	3.70073	3.57029
rs7856183	17169092		C	T	0.00714692	0.00615294	0.773488	40424	-0.24219	0.126522	3.66421	3.78835	0.0516105	3.67682	-0.222981	0.12073	3.41119	3.54301	3.42215
rs184607681	17186174		A	G	0.0066301	0.0055962	0.822056	40424	-0.244534	0.127774	3.66265	3.78835	0.0516105	3.6755	-0.230754	0.122041	3.57513	3.71886	3.58744
rs187250234	17152017		T	C	0.00664829	0.0056142	0.822081	40424	-0.244119	0.127556	3.66269	3.7883	0.051612	3.67553	-0.22991	0.12184	3.56073	3.70354	3.57294
rs189380081	17145165		C	G	0.00665087	0.00561775	0.822176	40424	-0.244051	0.127523	3.66256	3.78814	0.051617	3.67539	-0.22946	0.121798	3.54919	3.69126	3.56132
rs148430506	17172614		T	C	0.00718681	0.00619694	0.770939	40424	-0.241808	0.126331	3.66372	3.78762	0.051633	3.6763	-0.222258	0.120542	3.39965	3.53056	3.41052
rs73646740	16950880		T	C	0.00916512	0.00799097	0.686296	40424	-0.227039	0.118464	3.67305	3.78744	0.0516386	3.68365	-0.206562	0.113503	3.312	3.42677	3.32078
rs78829738	17299945		C	G	0.00325157	0.00448725	0.374171	40424	0.420292	0.213592	3.87196	3.78657	0.0516654	3.90172	0.577478	0.207352	7.75627	7.48283	7.87374
rs142153259	17173652		TCTC	T	0.00718636	0.0061965	0.770912	40424	-0.241781	0.126335	3.66269	3.78654	0.0516663	3.67526	-0.222268	0.120546	3.39975	3.53066	3.41062
rs146028240	17174618		C	T	0.00718598	0.00619608	0.770871	40424	-0.24179	0.126339	3.66269	3.78654	0.0516663	3.67526	-0.2223	0.12055	3.40048	3.53144	3.41135
rs181448838	17148060		A	T	0.00665002	0.0056173	0.822179	40424	-0.244022	0.127534	3.66103	3.78653	0.0516667	3.67386	-0.229452	0.121811	3.54821	3.69022	3.56033
rs148960517	17174504		G	A	0.00718606	0.00619624	0.770872	40424	-0.241774	0.126338	3.66226	3.78609	0.0516802	3.67483	-0.222279	0.120549	3.39993	3.53085	3.4108
rs186210201	17142936		C	T	0.00665168	0.00561866	0.82221	40424	-0.243948	0.127506	3.66043	3.78589	0.0516864	3.67325	-0.229358	0.121783	3.54695	3.68886	3.55906
rs60127505	17173902		AG	A	0.0071862	0.00619649	0.770903	40424	-0.241746	0.126334	3.66166	3.78545	0.0517	3.67423	-0.222236	0.120546	3.39881	3.52966	3.40967
rs76082571	17316304		C	T	0.00325382	0.00448806	0.373939	40424	0.420209	0.213603	3.87003	3.78471	0.0517229	3.89976	0.576631	0.207373	7.732	7.45957	7.8487
rs16935390	17173516		T	C	0.00718636	0.00619679	0.770914	40424	-0.24172	0.126333	3.66093	3.78469	0.0517235	3.6735	-0.222201	0.120544	3.39782	3.52861	3.40868
rs147567155	17172804		G	A	0.00718657	0.00619704	0.770943	40424	-0.241712	0.12633	3.66086	3.78461	0.051726	3.67343	-0.222185	0.120542	3.39747	3.52824	3.40832
rs73410488	16787767		T	C	0.0745425	0.0773083	0.731244	40424	0.0752787	0.0385556	3.81215	3.78452	0.0517287	3.8134	0.0516684	0.0366102	1.99179	1.97914	1.99213
rs10733320	16754802		T	C	0.73491	0.72469	0.759347	40424	-0.0435916	0.0223813	3.79346	3.78437	0.0517334	3.79392	-0.0376752	0.0213477	3.11466	3.10632	3.11495
rs145635246	17173248		A	G	0.00718647	0.00619711	0.770941	40424	-0.241692	0.126329	3.66031	3.78403	0.0517439	3.67287	-0.222155	0.120541	3.39661	3.52732	3.40745
rs184910623	16977882		C	G	0.00771842	0.00862743	0.392849	40424	0.300855	0.153197	3.85668	3.7838	0.051751	3.86564	0.227431	0.144409	2.48034	2.43352	2.48412
rs191049701	16977884		C	A	0.00771842	0.00862743	0.392849	40424	0.300855	0.153197	3.85668	3.7838	0.051751	3.86564	0.22743	0.144409	2.48032	2.4335	2.4841
rs4961554	17380607		A	G	0.871393	0.875583	0.924385	40424	0.0531433	0.027395	3.76319	3.78355	0.0517587	3.76394	0.0626461	0.026173	5.72904	5.77484	5.73073
rs59698728	17172186		A	G	0.00718679	0.00619763	0.770918	40424	-0.241666	0.126327	3.65964	3.78332	0.0517659	3.6722	-0.222102	0.120538	3.39513	3.52575	3.40596
rs116403689	17181898		G	T	0.0071434	0.00614891	0.773351	40424	-0.242128	0.126572	3.65944	3.7833	0.0517665	3.67202	-0.223289	0.120773	3.41818	3.55039	3.42918
rs115803412	17181947		C	T	0.00714335	0.00614901	0.773346	40424	-0.242098	0.126571	3.65857	3.78238	0.0517949	3.67114	-0.223258	0.120773	3.41725	3.54941	3.42825
rs36065055	16902256		T	C	0.0344353	0.0325537	0.914534	40424	-0.097907	0.0506531	3.73608	3.78234	0.0517962	3.73853	-0.10805	0.0486391	4.93487	5.01834	4.93902
rs60546162	17171759		A	G	0.00718699	0.00619817	0.770927	40424	-0.241589	0.126322	3.65764	3.78121	0.0518312	3.67018	-0.222015	0.120533	3.39275	3.52323	3.40357
rs59305778	17183252		C	T	0.00714294	0.00614892	0.773314	40424	-0.242052	0.126571	3.65721	3.78095	0.0518392	3.66977	-0.2232	0.120773	3.41547	3.54752	3.42646
rs183181099	17188618		G	A	0.00662935	0.00559697	0.821967	40424	-0.244268	0.127775	3.65458	3.77983	0.0518739	3.66738	-0.230464	0.122042	3.56608	3.70923	3.57833
rs7027539	17380028		G	T	0.871371	0.875558	0.925294	40424	0.0530879	0.0273806	3.75929	3.77962	0.0518804	3.76005	0.0625503	0.0261593	5.7175	5.76314	5.71918
rs75566508	17171599		T	C	0.00718707	0.00619851	0.770915	40424	-0.241535	0.12632	3.65607	3.77955	0.0518826	3.6686	-0.221959	0.120531	3.39115	3.52154	3.40196
rs141513952	17171373		CA	C	0.00718727	0.00619872	0.77092	40424	-0.241525	0.126317	3.65593	3.77941	0.051887	3.66846	-0.221951	0.120528	3.39104	3.52142	3.40185
rs79298739	17171300		T	C	0.0071873	0.00619877	0.770927	40424	-0.241512	0.126316	3.65563	3.77909	0.0518969	3.66816	-0.221945	0.120527	3.39093	3.5213	3.40174
rs2165688	17368655		G	T	0.865191	0.869456	0.898971	40424	0.0527025	0.0271825	3.7591	3.77892	0.0519022	3.75983	0.0623394	0.0259725	5.761	5.80604	5.76266
rs189116157	17188693		T	C	0.00662929	0.00559703	0.821962	40424	-0.244236	0.127776	3.6536	3.7788	0.0519059	3.66639	-0.230444	0.122042	3.56546	3.70857	3.5777
rs201316279	17182639		A	AT	0.00714305	0.00614939	0.773309	40424	-0.241976	0.126569	3.65504	3.77866	0.0519102	3.66759	-0.223125	0.12077	3.4133	3.54522	3.42427
rs114715742	17170806		A	G	0.00718719	0.00619879	0.770918	40424	-0.241497	0.126317	3.65513	3.77856	0.0519133	3.66765	-0.221919	0.120528	3.39009	3.52041	3.40089
rs117604787	16601578		C	T	0.00750442	0.00599315	0.575109	40424	-0.286911	0.150639	3.62762	3.77847	0.0519161	3.64204	-0.366271	0.143104	6.55089	6.97796	6.60062
rs115773989	17171036		G	A	0.00718716	0.00619877	0.770927	40424	-0.241481	0.126316	3.65469	3.7781	0.0519276	3.66721	-0.221914	0.120527	3.38999	3.5203	3.40079
rs116146287	17171147		C	T	0.00718716	0.00619877	0.770927	40424	-0.241474	0.126315	3.6545	3.7779	0.0519338	3.66702	-0.221914	0.120527	3.39001	3.52032	3.40081
rs114602030	17185709		C	T	0.00714225	0.00614931	0.773257	40424	-0.241949	0.126572	3.65404	3.77759	0.0519434	3.66657	-0.222982	0.120771	3.40889	3.54055	3.41984
rs192909765	17189504		C	G	0.00662902	0.00559713	0.821937	40424	-0.244168	0.127777	3.65149	3.77656	0.0519754	3.66426	-0.230376	0.122043	3.56328	3.70625	3.57551
rs116085908	17170465		C	A	0.00718979	0.00620182	0.770679	40424	-0.241423	0.126311	3.65321	3.77654	0.051976	3.66572	-0.221839	0.120522	3.38801	3.5182	3.3988
rs114414695	17170515		T	G	0.00718727	0.00619932	0.77093	40424	-0.241391	0.126311	3.65225	3.77553	0.0520074	3.66475	-0.221807	0.120522	3.38702	3.51715	3.3978
rs149881141	17170045		G	A	0.00718771	0.00619986	0.770934	40424	-0.241376	0.126306	3.65209	3.77536	0.0520127	3.66459	-0.221773	0.120517	3.38627	3.51635	3.39705
rs16935397	17186374		T	C	0.00714211	0.00614942	0.773234	40424	-0.241879	0.126573	3.65185	3.77529	0.0520149	3.66437	-0.222941	0.120772	3.40762	3.53919	3.41855
rs116365570	17165836		T	C	0.0071896	0.00620179	0.770849	40424	-0.241348	0.126293	3.652	3.77525	0.0520161	3.6645	-0.221676	0.120503	3.38409	3.51403	3.39485
rs116762987	17170103		G	T	0.00718766	0.00619986	0.770936	40424	-0.241365	0.126306	3.65175	3.775	0.0520239	3.66425	-0.221763	0.120517	3.38597	3.51604	3.39675
rs114075246	17170716		A	G	0.0071824	0.00619384	0.771055	40424	-0.241455	0.126354	3.65168	3.77494	0.0520258	3.66418	-0.221912	0.120563	3.38792	3.51815	3.39871
rs7037203	17167980		T	C	0.0071885	0.00620075	0.770931	40424	-0.241346	0.126297	3.65169	3.77493	0.0520261	3.66419	-0.221689	0.120508	3.38419	3.51415	3.39496
rs77998252	17165712		T	C	0.00718967	0.00620188	0.770833	40424	-0.241337	0.126293	3.65167	3.7749	0.052027	3.66416	-0.221667	0.120503	3.38378	3.5137	3.39454
rs201508929	17163859		C	CTACAAAAAT	0.00718985	0.00620204	0.770859	40424	-0.241323	0.126286	3.65164	3.77487	0.0520279	3.66414	-0.221639	0.120498	3.38322	3.51312	3.39398
rs7861471	17163894		A	G	0.00718984	0.00620204	0.770859	40424	-0.241319	0.126286	3.65154	3.77476	0.0520314	3.66403	-0.221636	0.120498	3.38314	3.51303	3.3939
rs13286174	17164541		T	C	0.00718981	0.00620196	0.770862	40424	-0.241322	0.126288	3.65151	3.77474	0.052032	3.66401	-0.221651	0.120499	3.38355	3.51347	3.39431
rs115466020	17164542		G	A	0.00718981	0.00620196	0.770862	40424	-0.241322	0.126288	3.65151	3.77474	0.052032	3.66401	-0.221651	0.120499	3.38355	3.51347	3.39431
rs7856549	17169424		A	G	0.00718783	0.00620014	0.770935	40424	-0.241348	0.126304	3.65135	3.77458	0.052037	3.66385	-0.221715	0.120514	3.38465	3.51463	3.39541
rs148154286	17164417		G	A	0.00718978	0.00620196	0.770873	40424	-0.241308	0.126287	3.65116	3.77437	0.0520435	3.66366	-0.22164	0.120498	3.38325	3.51314	3.39401
rs115545794	17169958		A	G	0.00718772	0.00620007	0.770929	40424	-0.241339	0.126304	3.65104	3.77425	0.0520472	3.66354	-0.221731	0.120515	3.38507	3.51508	3.39584
rs116057383	17169655		T	C	0.00718778	0.00620013	0.770938	40424	-0.241335	0.126304	3.65095	3.77416	0.05205	3.66345	-0.221714	0.120514	3.38459	3.51458	3.39536
rs115328399	17169637		C	A	0.00718778	0.00620013	0.770942	40424	-0.241328	0.126303	3.65078	3.77398	0.0520556	3.66328	-0.221706	0.120514	3.38441	3.51438	3.39517
rs7847317	17163433		T	C	0.00718977	0.00620204	0.770854	40424	-0.241289	0.126286	3.65058	3.77375	0.0520628	3.66307	-0.221614	0.120498	3.38246	3.51231	3.39321
rs116566237	17147522		T	C	0.00723437	0.00625568	0.767389	40424	-0.240979	0.126125	3.65052	3.77355	0.052069	3.66298	-0.219007	0.120291	3.31474	3.44041	3.32505
rs59700619	17166392		C	G	0.00718925	0.00620177	0.770864	40424	-0.241282	0.126292	3.65007	3.77321	0.0520796	3.66255	-0.221617	0.120503	3.38231	3.51214	3.39306
rs57907512	17166843		A	T	0.00718909	0.00620158	0.770855	40424	-0.241288	0.126295	3.65007	3.77321	0.0520796	3.66256	-0.221627	0.120505	3.38244	3.51229	3.3932
rs151181774	17169889		A	G	0.00718773	0.00620025	0.77093	40424	-0.241296	0.126303	3.64984	3.77298	0.0520868	3.66232	-0.221688	0.120514	3.38385	3.51379	3.39462
rs60503811	17166686		T	C	0.00718912	0.00620171	0.770851	40424	-0.241266	0.126294	3.64946	3.77257	0.0520995	3.66194	-0.221607	0.120505	3.38189	3.5117	3.39264
rs61562344	17166593		G	A	0.00718917	0.00620176	0.77085	40424	-0.241264	0.126293	3.64943	3.77254	0.0521005	3.66191	-0.221605	0.120504	3.38187	3.51168	3.39262
rs16935399	17187351		G	A	0.00714197	0.00614997	0.773186	40424	-0.241752	0.126572	3.64807	3.7713	0.0521391	3.66057	-0.222813	0.120772	3.40372	3.53506	3.41463
rs7024284	17168380		A	G	0.00718148	0.00619459	0.771517	40424	-0.241248	0.126308	3.64811	3.77118	0.0521428	3.66059	-0.221501	0.120515	3.37805	3.50766	3.38878
rs7861548	17316680		C	T	0.82968	0.833602	0.723959	40424	0.0531197	0.0274182	3.75348	3.77089	0.0521519	3.75413	0.0588811	0.0261979	5.05148	5.08398	5.05261
rs79665757	17316679		G	C	0.829696	0.83362	0.724035	40424	0.0531016	0.0274181	3.75094	3.76833	0.0522318	3.75159	0.058878	0.0261979	5.05096	5.08346	5.05209
rs114200181	17163174		A	G	0.00718985	0.00620294	0.770909	40424	-0.241074	0.126269	3.6451	3.76797	0.052243	3.65755	-0.221391	0.120483	3.37652	3.50601	3.38724
rs190957574	17191164		C	A	0.006628	0.00559766	0.821916	40424	-0.243872	0.12778	3.64249	3.76707	0.0522711	3.65519	-0.230095	0.122044	3.55452	3.69693	3.56668
rs148721359	16681737		T	C	0.00163354	0.00116195	0.56218	40424	-0.627399	0.337466	3.45644	3.76696	0.0522746	3.51277	-0.618482	0.327262	3.5716	3.93836	3.63064
rs145970494	16692957		G	C	0.0232709	0.0213482	0.55879	40424	-0.157191	0.081767	3.6957	3.76651	0.0522886	3.69938	-0.17756	0.0774542	5.25534	5.39452	5.26423
rs143945451	17150053		C	T	0.00723308	0.00625502	0.767412	40424	-0.240704	0.126119	3.64254	3.76513	0.0523318	3.65495	-0.218955	0.120292	3.31309	3.43866	3.32339
rs142604245	17150748		A	G	0.00723271	0.00625437	0.767401	40424	-0.2407	0.126124	3.64215	3.76473	0.0523443	3.65456	-0.219051	0.120299	3.31566	3.44139	3.32597
rs142448757	17150776		G	A	0.00723272	0.00625442	0.767398	40424	-0.240694	0.126123	3.64202	3.76459	0.0523487	3.65443	-0.219043	0.120298	3.31542	3.44114	3.32574
rs150458879	17150954		T	C	0.0072326	0.00625427	0.767394	40424	-0.240686	0.126124	3.6417	3.76426	0.052359	3.65411	-0.219064	0.1203	3.31597	3.44171	3.32628
rs116802517	17181157		A	G	0.00713078	0.00613861	0.774498	40424	-0.241518	0.126571	3.64105	3.76394	0.052369	3.6535	-0.222662	0.120769	3.39922	3.5303	3.4101
rs144149741	17150598		T	G	0.00723276	0.00625463	0.767399	40424	-0.240666	0.126122	3.64122	3.76375	0.052375	3.65363	-0.218995	0.120296	3.31408	3.43972	3.32439
rs144512635	17180524		A	G	0.00713116	0.00613924	0.774475	40424	-0.241484	0.126564	3.64043	3.76328	0.0523897	3.65288	-0.222601	0.120762	3.39775	3.52873	3.40862
rs141177548	17177385		C	T	0.00717198	0.00618515	0.771994	40424	-0.241072	0.126347	3.64053	3.76321	0.0523919	3.65295	-0.221562	0.120552	3.37785	3.50745	3.38858
rs4436220	16894953		C	T	0.918002	0.919974	0.991005	40424	0.0621046	0.0321304	3.73609	3.7628	0.0524048	3.73718	0.0605372	0.0307903	3.86559	3.89987	3.86672
rs140368598	17151586		T	C	0.00723205	0.00625361	0.76739	40424	-0.240645	0.126128	3.64023	3.76271	0.0524076	3.65263	-0.219116	0.120305	3.31728	3.4431	3.3276
rs16935382	17162902		T	G	0.00719057	0.0062042	0.770985	40424	-0.240853	0.126247	3.63967	3.76224	0.0524223	3.65208	-0.221189	0.120462	3.37154	3.50072	3.38222
rs10962765	16955672		C	T	0.00919176	0.0080208	0.698901	40424	-0.222611	0.116542	3.64859	3.76161	0.0524421	3.65949	-0.200476	0.112136	3.19623	3.30603	3.20461
rs139431532	17151977		C	T	0.00723174	0.00625336	0.767384	40424	-0.240611	0.126128	3.63919	3.76161	0.0524421	3.65158	-0.219123	0.120307	3.31737	3.4432	3.32769
rs181878017	17215213		G	C	0.00662794	0.00559929	0.819005	40424	-0.244129	0.12801	3.63709	3.76149	0.0524458	3.64977	-0.230627	0.122241	3.55946	3.70223	3.57166
rs188103863	17214483		A	G	0.0066282	0.00559954	0.819033	40424	-0.244101	0.128005	3.63652	3.76089	0.0524646	3.6492	-0.230607	0.122236	3.55915	3.7019	3.57136
rs183126786	17205245		C	T	0.00663209	0.00560339	0.819371	40424	-0.24393	0.127919	3.6363	3.76062	0.0524731	3.64897	-0.230337	0.122161	3.55517	3.69765	3.56734
rs114930128	17153518		G	C	0.00723096	0.00625217	0.767416	40424	-0.240577	0.126135	3.63777	3.76013	0.0524885	3.65015	-0.219272	0.120316	3.32139	3.44747	3.33174
rs114397203	17154090		T	G	0.00723053	0.00625157	0.767409	40424	-0.240584	0.126141	3.63768	3.76004	0.0524913	3.65006	-0.219342	0.120322	3.32316	3.44934	3.33352
rs115699726	17189889		C	G	0.00714072	0.00615081	0.773147	40424	-0.241352	0.12657	3.63616	3.75874	0.0525322	3.64858	-0.222437	0.120769	3.39236	3.523	3.4032
rs80042791	16654117		T	C	0.00780891	0.00628087	0.535808	40424	-0.291262	0.153313	3.60921	3.7578	0.0525617	3.62284	-0.373195	0.145286	6.59817	7.02302	6.64681
rs2010086	17377414		T	C	0.871861	0.876111	0.92977	40424	0.0528754	0.0273529	3.7368	3.75694	0.0525887	3.73754	0.0625978	0.0261356	5.73659	5.78247	5.73829
rs188356762	17156854		G	T	0.00663435	0.00560324	0.823336	40424	-0.243148	0.127573	3.63264	3.75663	0.0525985	3.64526	-0.229366	0.121857	3.54289	3.68457	3.55498
rs185037304	17156737		A	G	0.00663443	0.00560346	0.823333	40424	-0.243124	0.127571	3.63205	3.75601	0.052618	3.64467	-0.229331	0.121855	3.54195	3.68356	3.55403
rs188745901	17154898		T	C	0.00663512	0.00560471	0.823282	40424	-0.243087	0.127562	3.63144	3.75536	0.0526385	3.64406	-0.229125	0.121843	3.53628	3.67754	3.54832
rs115522943	17156130		C	G	0.00719839	0.00621578	0.769615	40424	-0.240639	0.12627	3.6319	3.75407	0.0526791	3.64426	-0.220208	0.120455	3.3421	3.46951	3.3526
rs16935377	17162572		A	G	0.00719087	0.00620587	0.771085	40424	-0.240544	0.126223	3.63174	3.75387	0.0526854	3.64409	-0.220835	0.120439	3.36203	3.49064	3.37265
rs114710625	17190349		G	T	0.00714045	0.00615133	0.773169	40424	-0.241165	0.126565	3.63082	3.75311	0.0527094	3.6432	-0.222266	0.120764	3.38741	3.51775	3.39822
rs144991534	17190749		G	A	0.00717984	0.00619549	0.770728	40424	-0.240788	0.126367	3.63079	3.75293	0.052715	3.64316	-0.221365	0.120573	3.37068	3.49983	3.38136
rs7025329	17161682		G	C	0.00722688	0.00624747	0.767638	40424	-0.2404	0.126164	3.63075	3.75275	0.0527207	3.64308	-0.21978	0.120358	3.33447	3.46134	3.3449
rs111435817	17143710		G	A	0.00665323	0.00562617	0.821819	40424	-0.242815	0.127479	3.62807	3.75175	0.0527523	3.64065	-0.228213	0.121749	3.51359	3.65338	3.52547
rs138061165	17152375		G	T	0.00726999	0.00629742	0.763355	40424	-0.240238	0.126097	3.62972	3.75156	0.0527583	3.64203	-0.218263	0.120261	3.29391	3.41827	3.30408
rs114048778	17181300		T	C	0.00713113	0.00614174	0.774795	40424	-0.241015	0.126519	3.62889	3.75105	0.0527743	3.64126	-0.22198	0.120726	3.38085	3.51081	3.39161
rs116054708	17161142		G	A	0.00719132	0.00620676	0.771165	40424	-0.240404	0.126208	3.62835	3.75029	0.0527984	3.64068	-0.220699	0.120425	3.35865	3.48706	3.36925
rs7029226	17162401		C	T	0.00719111	0.0062067	0.771154	40424	-0.240377	0.12621	3.6274	3.74929	0.0528299	3.63972	-0.220673	0.120427	3.35778	3.48613	3.36838
rs59274061	17160818		T	A	0.00719132	0.00620685	0.771187	40424	-0.240364	0.126206	3.62727	3.74916	0.0528341	3.63959	-0.220669	0.120423	3.35788	3.48624	3.36848
rs7025130	17161792		A	G	0.00719114	0.00620685	0.771155	40424	-0.240357	0.126209	3.62689	3.74876	0.0528467	3.63921	-0.220661	0.120426	3.35745	3.48579	3.36805
rs7025248	17161857		A	T	0.00719113	0.00620684	0.771158	40424	-0.240353	0.126209	3.62672	3.74858	0.0528524	3.63904	-0.22066	0.120426	3.35741	3.48574	3.368
rs2593390	17404822		A	G	0.872284	0.876874	0.898409	40424	0.0538791	0.0279059	3.72777	3.74821	0.0528641	3.72853	0.0654551	0.0266484	6.03315	6.08351	6.03507
rs7036370	17160053		T	A	0.00719139	0.00620679	0.771179	40424	-0.240335	0.126209	3.6262	3.74805	0.0528692	3.63852	-0.220683	0.120425	3.35822	3.4866	3.36882
rs2584546	17405219		G	A	0.872283	0.876873	0.898355	40424	0.0538783	0.0279064	3.72751	3.74795	0.0528723	3.72827	0.065449	0.0266489	6.03179	6.08213	6.0337
rs10511628	16969505		G	A	0.0482555	0.0512073	0.99998	40424	0.0779002	0.0400715	3.77926	3.74656	0.0529163	3.78094	0.0657528	0.0381068	2.97732	2.94884	2.97835
rs185354278	17196745		G	A	0.006624	0.0055972	0.82116	40424	-0.243272	0.127838	3.62134	3.74481	0.0529717	3.6339	-0.229534	0.122085	3.53486	3.67604	3.54689
rs10962924	17235434		A	G	0.130426	0.12644	0.941859	40424	-0.052014	0.0269519	3.72445	3.74407	0.0529952	3.72518	-0.0592221	0.025748	5.2903	5.32996	5.29171
rs146708119	17215892		G	A	0.00663872	0.00561342	0.817474	40424	-0.243506	0.128007	3.61868	3.74208	0.0530584	3.63122	-0.229713	0.122224	3.5323	3.67333	3.54431
rs2780214	17405618		C	T	0.871126	0.875591	0.884137	40424	0.054039	0.0280127	3.72139	3.7417	0.0530704	3.72214	0.0645893	0.0267464	5.83163	5.87922	5.8334
rs181582453	16777514		C	A	0.000734538	0.000599065	0.148956	40424	-1.94954	1.11563	3.05369	3.74126	0.0530844	3.22531	-1.94165	1.08256	3.21694	3.96881	3.35504
rs187246492	16710290		T	C	0.00198771	0.00248348	0.177698	40424	0.81596	0.416418	3.83954	3.74094	0.0530946	3.87183	0.877506	0.395747	4.9166	4.72608	4.97193
rs138449156	16994577		C	A	0.000461183	0.000599741	0.256669	40424	1.34939	0.694362	3.77663	3.73967	0.0531349	4.15555	0.952231	0.650926	2.14003	2.01344	2.24407
rs187783778	17220250		T	G	0.00661321	0.00558759	0.820157	40424	-0.243526	0.128062	3.61619	3.73948	0.053141	3.62872	-0.229997	0.122278	3.53791	3.67932	3.54996
rs182291647	17218628		T	C	0.0066142	0.00558897	0.820229	40424	-0.243417	0.128036	3.6144	3.73758	0.0532014	3.62691	-0.229854	0.122255	3.53483	3.67604	3.54686
rs150776524	17195776		ACT	A	0.00717479	0.00619339	0.770204	40424	-0.240397	0.126425	3.61573	3.7371	0.0532167	3.62799	-0.220941	0.120616	3.35541	3.48366	3.36599
rs146817232	17195765		T	C	0.00717482	0.00619345	0.770203	40424	-0.240393	0.126424	3.61561	3.73698	0.0532206	3.62787	-0.220938	0.120615	3.35534	3.48358	3.36592
rs183531092	17200794		C	T	0.00662207	0.00559675	0.820871	40424	-0.243091	0.127874	3.61389	3.73697	0.0532209	3.62639	-0.229337	0.122111	3.52729	3.668	3.53927
rs193052158	17201310		C	T	0.00662193	0.00559664	0.820828	40424	-0.243095	0.127878	3.61376	3.73684	0.053225	3.62627	-0.22935	0.122115	3.52746	3.66817	3.53943
rs181843915	17203473		C	T	0.00662072	0.0055957	0.820742	40424	-0.243083	0.127898	3.61229	3.7353	0.0532741	3.62478	-0.229359	0.122132	3.52672	3.66739	3.53869
rs192907896	17217129		T	G	0.00661479	0.00559038	0.820281	40424	-0.243238	0.128017	3.6102	3.73315	0.0533427	3.62269	-0.229627	0.122237	3.5289	3.66974	3.54089
rs187286601	17216096		G	T	0.00661542	0.00559112	0.820308	40424	-0.243185	0.128004	3.60936	3.73225	0.0533715	3.62184	-0.229561	0.122225	3.52757	3.66832	3.53955
rs192247663	17216197		C	T	0.00661534	0.00559106	0.820302	40424	-0.243186	0.128005	3.60931	3.73221	0.0533727	3.62179	-0.22956	0.122226	3.52747	3.66821	3.53945
rs56170891	16556532		C	T	0.0810277	0.0799179	0.453711	40424	-0.0937007	0.048757	3.69327	3.72933	0.0534648	3.69477	-0.0848977	0.0460347	3.40111	3.43617	3.40229
rs7020252	17160348		A	G	0.00719162	0.00621128	0.771532	40424	-0.239526	0.126136	3.60602	3.72669	0.0535494	3.6182	-0.219673	0.120365	3.33086	3.45759	3.34129
rs143419336	17292111		A	G	0.00053147	0.000686688	0.196899	40424	1.48008	0.750285	3.89152	3.72611	0.053568	4.04487	1.29706	0.711032	3.32768	3.13346	3.42652
rs182313208	17211194		G	A	0.00661734	0.00559407	0.820472	40424	-0.242895	0.127958	3.60329	3.72585	0.0535764	3.61573	-0.229198	0.122181	3.51898	3.65918	3.5309
rs116146554	17208265		C	T	0.00712833	0.00614468	0.772174	40424	-0.240591	0.126726	3.60436	3.72533	0.053593	3.61656	-0.221648	0.120887	3.3618	3.49061	3.37244
rs4995398	16838211		A	G	0.285524	0.293025	0.923252	40424	0.0387269	0.0200454	3.73248	3.72491	0.0536065	3.7329	0.0490499	0.0190874	6.60367	6.58244	6.60491
rs139559549	17203899		C	T	0.00673641	0.00571716	0.806451	40424	-0.242647	0.127853	3.6019	3.72427	0.0536271	3.61431	-0.229316	0.122099	3.5273	3.6679	3.53926
rs7035637	16739403		A	G	0.748378	0.740289	0.73179	40424	-0.0451925	0.0233989	3.73028	3.72078	0.0537393	3.73076	-0.0372442	0.0222237	2.80857	2.80074	2.80882
rs201283112	17357610		T	TAA	0.575802	0.575302	0.773381	40424	0.0387601	0.0201084	3.71546	3.71923	0.0537892	3.71583	0.0253337	0.0191442	1.75115	1.75251	1.75122
rs190409132	17224815		A	T	0.00661002	0.00558792	0.819818	40424	-0.242972	0.128116	3.59672	3.71899	0.0537969	3.60911	-0.229416	0.122315	3.51793	3.65808	3.52985
rs150638185	17158700		G	T	0.00717959	0.00619939	0.772204	40424	-0.23937	0.126191	3.59817	3.71852	0.053812	3.61029	-0.219533	0.120399	3.32473	3.4511	3.33512
rs148863405	16581527		G	C	0.00559255	0.00503207	0.301393	40424	-0.437813	0.232499	3.54596	3.71842	0.0538153	3.56525	-0.375013	0.220458	2.89361	3.02894	2.90651
rs201705404	17208435		TTGATG	T	0.00673453	0.0057167	0.806273	40424	-0.242519	0.127885	3.59625	3.71832	0.0538185	3.60861	-0.229133	0.122124	3.52028	3.66045	3.53219
rs115948607	17158421		A	T	0.00717975	0.00619979	0.772183	40424	-0.239325	0.126189	3.59694	3.71723	0.0538536	3.60906	-0.219468	0.120396	3.32291	3.44916	3.33328
rs149352757	17215652		A	C	0.00673044	0.00571234	0.806101	40424	-0.242598	0.12795	3.59495	3.71698	0.0538617	3.60731	-0.229427	0.122186	3.5257	3.66622	3.53765
rs141612895	16478239		G	T	0.000285874	0.00039592	0.106465	40424	2.73999	1.4131	3.7597	3.716	0.0538933	4.02869	2.14863	1.30379	2.71585	2.61255	2.82831
rs76965638	16554288		C	T	0.0230617	0.0217036	0.419511	40424	-0.18115	0.0949762	3.63786	3.71527	0.0539169	3.64266	-0.163352	0.0895061	3.33074	3.40627	3.3349
rs147652482	17211894		C	T	0.00673238	0.00571483	0.806198	40424	-0.242465	0.127917	3.5929	3.7148	0.0539321	3.60524	-0.229194	0.122152	3.52049	3.66067	3.5324
rs192005444	17210410		C	T	0.00722842	0.00625403	0.761454	40424	-0.240155	0.126674	3.59427	3.71451	0.0539415	3.60636	-0.220355	0.12082	3.32633	3.45283	3.33672
rs191510399	17140746		T	C	0.00666205	0.00563682	0.823156	40424	-0.241101	0.127202	3.59262	3.71424	0.0539502	3.60494	-0.226553	0.121487	3.47758	3.61503	3.48921
rs181117911	17225172		C	G	0.00661018	0.00558923	0.819775	40424	-0.24276	0.12811	3.59077	3.71272	0.0539993	3.60312	-0.229166	0.122305	3.51085	3.65054	3.52272
rs140821367	17193393		G	A	0.00716422	0.00618623	0.771644	40424	-0.23948	0.126379	3.59077	3.71078	0.0540621	3.60285	-0.219945	0.12057	3.32773	3.45431	3.33814
rs111424898	17184442		G	A	0.00775007	0.00680844	0.717032	40424	-0.238349	0.125795	3.59003	3.70866	0.0541308	3.60187	-0.214984	0.119876	3.21624	3.33474	3.22574
rs188809914	17087175		C	A	0.00268991	0.00312107	0.248167	40424	0.617161	0.316495	3.80244	3.70823	0.0541448	3.83368	0.752631	0.29765	6.39369	6.11418	6.47019
rs59433459	17194300		C	T	0.00716288	0.00618537	0.771541	40424	-0.239426	0.126395	3.58827	3.70817	0.0541467	3.60034	-0.219894	0.120582	3.32555	3.452	3.33594
rs149040749	17195024		A	G	0.00716211	0.00618512	0.771466	40424	-0.239377	0.126402	3.58635	3.70615	0.0542123	3.59841	-0.219827	0.120588	3.32317	3.44948	3.33355
rs184954106	17197990		T	C	0.00716029	0.00618384	0.771248	40424	-0.239386	0.126432	3.58494	3.70469	0.0542597	3.59699	-0.2198	0.120611	3.32112	3.44731	3.33148
rs149401082	17002990		A	C	0.0068819	0.00808259	0.563044	40424	0.256286	0.131881	3.77643	3.70442	0.0542685	3.78498	0.347177	0.125415	7.66301	7.40756	7.69851
rs144598738	17195428		C	CT	0.00716191	0.00618537	0.771418	40424	-0.239316	0.126405	3.5844	3.7041	0.0542789	3.59644	-0.219748	0.120589	3.32076	3.44693	3.33112
rs77937812	16641220		T	G	0.0229576	0.0214717	0.3558	40424	-0.197821	0.103952	3.62145	3.70369	0.0542923	3.62686	-0.191289	0.0981283	3.80007	3.89888	3.80607
rs58091700	17173842		T	C	0.00779147	0.00685481	0.715214	40424	-0.237703	0.125556	3.58419	3.70233	0.0543365	3.59597	-0.213867	0.119652	3.19479	3.31189	3.20415
rs116052690	17192904		C	T	0.00728429	0.00631259	0.759102	40424	-0.239076	0.12632	3.582	3.70144	0.0543655	3.594	-0.219814	0.120519	3.32658	3.45294	3.33695
rs6475067	16661092		C	T	0.335086	0.351834	0.998241	40424	0.0353862	0.0183826	3.70556	3.70032	0.054402	3.70594	0.0401331	0.0175579	5.22468	5.21399	5.22538
rs141799563	17198738		T	C	0.00715958	0.00618369	0.771215	40424	-0.239254	0.126438	3.58066	3.70018	0.0544066	3.59268	-0.219705	0.120615	3.31804	3.44404	3.32838
rs694895	16997020		G	A	0.641305	0.644884	0.998228	40424	0.0352242	0.0183281	3.69359	3.69911	0.0544415	3.69396	0.0322636	0.0175	3.39898	3.40472	3.39927
rs150456199	17200494		A	T	0.00715838	0.00618282	0.771149	40424	-0.239226	0.126454	3.5789	3.69833	0.054467	3.5909	-0.21968	0.120628	3.31656	3.44248	3.32689
rs141711536	17201554		A	G	0.00715777	0.00618242	0.771109	40424	-0.239215	0.126463	3.5781	3.6975	0.0544941	3.5901	-0.219668	0.120634	3.31584	3.44172	3.32617
rs34224729	17151356		A	G	0.00776418	0.00683339	0.71798	40424	-0.237408	0.125486	3.57932	3.69719	0.0545042	3.59108	-0.211672	0.119562	3.13427	3.248	3.14329
rs59453259	17193924		T	C	0.00728299	0.00631247	0.758992	40424	-0.238845	0.126327	3.5747	3.69376	0.0546164	3.58666	-0.219598	0.120522	3.31989	3.44585	3.33022
rs7046749	16877973		G	C	0.86811	0.856253	0.96655	40424	-0.0487405	0.0253098	3.70855	3.69211	0.0546704	3.70925	-0.0671951	0.0241949	7.7131	7.65274	7.71601
rs142661474	16895782		G	C	0.00123062	0.000898106	0.255085	40424	-1.07577	0.579471	3.44647	3.69021	0.0547327	3.48295	-1.20669	0.558049	4.67567	5.13559	4.73937
rs114991618	17196426		G	A	0.00727989	0.00631076	0.758794	40424	-0.238764	0.126358	3.57053	3.68939	0.0547596	3.58246	-0.219415	0.120545	3.31308	3.43865	3.32337
rs139219897	17198122		T	C	0.00727898	0.00631021	0.758701	40424	-0.23871	0.126371	3.56821	3.68695	0.0548398	3.58012	-0.219371	0.120554	3.3113	3.43676	3.32158
rs114391967	17199162		A	T	0.00727833	0.0063097	0.758675	40424	-0.238676	0.126379	3.56669	3.68536	0.0548921	3.57859	-0.219368	0.12056	3.31085	3.43628	3.32113
rs112159564	17190904		A	G	0.00784305	0.00690932	0.710103	40424	-0.237138	0.125564	3.56673	3.68387	0.0549412	3.57838	-0.213762	0.119669	3.19081	3.30759	3.20013
rs78641474	16979194		A	G	0.0472623	0.0501713	0.960669	40424	0.0793268	0.0411528	3.71572	3.68359	0.0549504	3.71739	0.0682389	0.0391688	3.03517	3.00546	3.03628
rs111331091	17184700		T	G	0.00731058	0.00634097	0.755739	40424	-0.238587	0.126363	3.56496	3.68341	0.0549563	3.57683	-0.21834	0.120516	3.28231	3.40595	3.29239
rs10810630	16788318		A	G	0.0142411	0.0159389	0.213159	40424	0.29817	0.154035	3.74704	3.68089	0.0550395	3.75246	0.340814	0.14378	5.61871	5.49032	5.63411
rs201200261	16886718		TG	T	0.699248	0.699532	0.808238	40424	0.0403356	0.0210527	3.6708	3.6798	0.0550755	3.67122	0.0337	0.0201386	2.80027	2.80737	2.8005
rs114630295	17207511		A	G	0.00723419	0.00626238	0.760734	40424	-0.238999	0.126647	3.56125	3.6798	0.0550755	3.57313	-0.220178	0.120807	3.32169	3.44796	3.33206
rs116772452	17206701		A	T	0.0072347	0.00626281	0.76075	40424	-0.23898	0.12664	3.56106	3.67961	0.0550817	3.57295	-0.220169	0.120801	3.32177	3.44804	3.33214
rs114108034	17207549		T	C	0.00723414	0.00626244	0.760741	40424	-0.238978	0.126646	3.56069	3.67921	0.0550949	3.57257	-0.220156	0.120806	3.32109	3.44732	3.33145
rs114325006	17206278		C	A	0.00723483	0.00626318	0.760764	40424	-0.238918	0.126635	3.55951	3.67798	0.0551356	3.57139	-0.220097	0.120797	3.31985	3.44601	3.3302
rs147231273	17202435		CTAT	C	0.00723691	0.00626487	0.760843	40424	-0.238803	0.126603	3.55792	3.67628	0.0551919	3.56978	-0.220076	0.120771	3.32061	3.4468	3.33096
rs114696203	17202284		G	A	0.00723702	0.00626502	0.760851	40424	-0.238797	0.1266	3.55787	3.67623	0.0551935	3.56973	-0.220068	0.120769	3.3205	3.44668	3.33086
rs601960	17296630		A	G	0.129662	0.125635	0.936856	40424	-0.0517034	0.0270417	3.65571	3.6748	0.0552409	3.65641	-0.0601644	0.0258373	5.42234	5.46361	5.42382
rs7847327	17209790		G	A	0.00723199	0.00626099	0.760749	40424	-0.238844	0.126667	3.55552	3.67378	0.0552747	3.56737	-0.220071	0.120823	3.31758	3.44361	3.32792
rs76775164	16566839		T	A	0.0218924	0.0202392	0.434152	40424	-0.182317	0.0961687	3.59408	3.67248	0.0553178	3.59902	-0.171836	0.0907669	3.58404	3.67166	3.58916
rs117061414	16809373		G	A	0.00579335	0.00468471	0.420043	40424	-0.377479	0.20149	3.50978	3.67162	0.0553464	3.52715	-0.452671	0.192195	5.54727	5.93549	5.59241
rs7042044	16515563		G	C	0.0140849	0.0124942	0.410312	40424	-0.238492	0.12627	3.56734	3.67132	0.0553563	3.57533	-0.298363	0.119092	6.27654	6.55276	6.30129
rs188827557	17227193		C	A	0.00661044	0.00559695	0.819662	40424	-0.241225	0.128061	3.54822	3.66783	0.0554724	3.56026	-0.227488	0.122243	3.46315	3.59978	3.47468
rs112015688	17178465		T	C	0.00783398	0.00689888	0.711106	40424	-0.236533	0.125524	3.55085	3.66709	0.055497	3.56238	-0.213425	0.119645	3.18198	3.29824	3.19125
rs144229478	17052979		C	T	0.00138952	0.00165864	0.122818	40424	1.19274	0.615725	3.75246	3.66708	0.0554973	3.81164	1.47175	0.568231	6.70841	6.39722	6.92213
rs113899251	17151903		A	G	0.00736366	0.00640776	0.753759	40424	-0.237285	0.125948	3.54944	3.66676	0.055508	3.56116	-0.214516	0.120086	3.19108	3.30912	3.20057
rs143999511	17152532		T	A	0.00736328	0.00640737	0.753758	40424	-0.237254	0.125951	3.54833	3.66561	0.0555463	3.56005	-0.214547	0.12009	3.19178	3.30987	3.20128
rs150655368	17243049		TTCTG	T	0.00759084	0.00667075	0.731708	40424	-0.237158	0.125906	3.54802	3.66529	0.055557	3.55961	-0.210507	0.119792	3.08802	3.19954	3.09681
rs2584545	17404776		G	C	0.909597	0.915032	0.898474	40424	0.0624489	0.0327383	3.63864	3.66517	0.055561	3.63965	0.0720837	0.0312199	5.33104	5.38728	5.33319
rs111325437	17177401		T	C	0.00776666	0.00683418	0.716536	40424	-0.236636	0.125615	3.54875	3.66513	0.0555623	3.5603	-0.212998	0.119701	3.16634	3.28186	3.17554
rs190064974	17239294		C	T	0.00663584	0.00562094	0.821507	40424	-0.240454	0.127724	3.54421	3.66362	0.0556127	3.55615	-0.227074	0.121866	3.47195	3.60886	3.4835
rs12236866	16980361		C	T	0.047579	0.0505054	0.985022	40424	0.0779586	0.0405572	3.69481	3.66316	0.055628	3.69645	0.0670259	0.0386113	3.01339	2.98415	3.01447
rs193170510	17241495		C	T	0.00663601	0.00562138	0.821524	40424	-0.240389	0.127719	3.54257	3.66189	0.0556704	3.5545	-0.227011	0.12186	3.47032	3.60713	3.48186
rs187468607	17241253		T	A	0.00663597	0.00562138	0.821528	40424	-0.240376	0.127718	3.54224	3.66154	0.0556821	3.55416	-0.227003	0.12186	3.47008	3.60687	3.48162
rs182788398	17241177		C	T	0.00663595	0.00562138	0.821526	40424	-0.24037	0.127718	3.54204	3.66134	0.0556888	3.55397	-0.227	0.12186	3.46998	3.60677	3.48152
rs74989580	16425664		T	C	0.0108372	0.0117713	0.119112	40424	0.454397	0.23555	3.72138	3.66115	0.0556952	3.72966	0.546777	0.222567	6.03533	5.8852	6.0548
rs184655117	17130915		A	G	0.00267771	0.00310334	0.246519	40424	0.616702	0.31836	3.75244	3.65928	0.0557577	3.78341	0.754191	0.299297	6.34978	6.0711	6.42661
rs7022813	16553716		C	G	0.0796569	0.0785702	0.458588	40424	-0.0930024	0.0488546	3.62391	3.65915	0.0557621	3.62536	-0.0835752	0.0461368	3.28141	3.31494	3.28251
rs115576261	17197096		A	C	0.00726634	0.00630193	0.759893	40424	-0.23779	0.126352	3.54178	3.65913	0.0557627	3.55351	-0.218294	0.120528	3.28024	3.40386	3.29033
rs139344027	17197155		A	C	0.00726625	0.00630193	0.759891	40424	-0.23777	0.126352	3.54119	3.65851	0.0557835	3.55292	-0.218278	0.120528	3.27974	3.40332	3.28982
rs147301580	16567331		TTTAAC	T	0.0218642	0.020217	0.434485	40424	-0.181995	0.0961874	3.58001	3.65798	0.0558012	3.58491	-0.171123	0.0907762	3.55363	3.64014	3.55866
rs2891072	16553933		C	A	0.0796625	0.0785785	0.458696	40424	-0.0929551	0.0488475	3.62128	3.65648	0.0558515	3.62273	-0.0835173	0.046131	3.27768	3.31115	3.27879
rs77636231	17275844		A	G	0.00472376	0.00593238	0.322171	40424	0.390311	0.202348	3.7207	3.65571	0.0558773	3.73429	0.46055	0.193844	5.6448	5.48995	5.67428
rs148638974	17199936		T	C	0.00792178	0.00700418	0.701512	40424	-0.23634	0.125617	3.53979	3.6555	0.0558844	3.55125	-0.210934	0.119642	3.10833	3.22032	3.11715
rs191142297	17234495		A	G	0.00662334	0.00560975	0.820033	40424	-0.240485	0.127882	3.53637	3.65531	0.0558908	3.54828	-0.227156	0.122046	3.46421	3.60073	3.47572
rs10962639	16846906		G	A	0.172363	0.172761	0.99201	40424	-0.0439589	0.0230434	3.63917	3.65413	0.0559304	3.63973	-0.0337793	0.0220863	2.33913	2.34832	2.33935
rs114522694	17193566		A	G	0.0074058	0.00642914	0.747465	40424	-0.237285	0.126189	3.53591	3.65266	0.0559797	3.54756	-0.221023	0.120462	3.36646	3.49493	3.37705
rs2990958	17295825		G	A	0.127614	0.123488	0.928796	40424	-0.0520678	0.02733	3.62959	3.64869	0.0561133	3.63029	-0.0600788	0.0261163	5.29199	5.33227	5.29342
rs146469015	17216585		A	G	0.00721405	0.0062467	0.761799	40424	-0.238086	0.126723	3.52988	3.64682	0.0561764	3.54156	-0.219361	0.120869	3.29375	3.41837	3.30394
rs114046801	17202157		C	A	0.00722381	0.00625645	0.762027	40424	-0.237814	0.126587	3.52934	3.6462	0.0561973	3.54101	-0.218937	0.120748	3.28759	3.41181	3.29774
rs1980936	16746982		T	G	0.269481	0.278977	0.767377	40424	0.0426448	0.0223107	3.65349	3.64524	0.0562297	3.65393	0.0295615	0.021217	1.94126	1.93729	1.94137
rs7848996	17097019		A	T	0.292468	0.298711	0.944206	40424	0.0373719	0.0195601	3.65046	3.64353	0.0562875	3.65086	0.0361927	0.01865	3.76605	3.75711	3.76644
rs2779766	17178366		G	C	0.143602	0.137956	0.92797	40424	-0.0498935	0.0262046	3.62521	3.64304	0.056304	3.62584	-0.0603877	0.0249637	5.85165	5.89562	5.85326
rs186729792	17210409		G	T	0.00721821	0.006252	0.761922	40424	-0.237794	0.126659	3.52476	3.64141	0.0563592	3.53639	-0.218932	0.120808	3.28419	3.40822	3.29432
rs11795333	16607662		T	C	0.00560522	0.00505723	0.29838	40424	-0.434087	0.232953	3.47231	3.63873	0.05645	3.49087	-0.368819	0.220989	2.78538	2.9129	2.79733
rs12350853	16554599		C	T	0.0797616	0.0786939	0.45857	40424	-0.0926804	0.0488255	3.60315	3.63805	0.056473	3.60459	-0.083483	0.0461113	3.27778	3.31122	3.27889
rs142205249	16949847		C	A	0.00558205	0.00466741	0.740438	40424	-0.275601	0.147232	3.50398	3.637	0.0565087	3.52001	-0.265225	0.141088	3.53384	3.69706	3.54985
rs115570524	17206417		C	T	0.00726779	0.00630763	0.75727	40424	-0.237462	0.126574	3.51966	3.63595	0.0565443	3.53125	-0.218208	0.120713	3.2676	3.39054	3.27761
rs10962549	16719445		C	T	0.163977	0.171024	0.622978	40424	0.0569055	0.0297856	3.65003	3.63466	0.0565882	3.6507	0.0494528	0.0282345	3.06776	3.05344	3.06819
rs142424460	17295309		G	A	0.00887953	0.00810052	0.655631	40424	-0.227956	0.121327	3.5301	3.63427	0.0566014	3.53979	-0.197518	0.115582	2.92034	3.01272	2.92694
rs112334684	17139685		G	A	0.00672169	0.00571055	0.818192	40424	-0.237835	0.126854	3.51515	3.63239	0.0566654	3.5269	-0.223327	0.12115	3.39812	3.53045	3.40921
rs184304180	17231351		T	G	0.00661308	0.00560359	0.819949	40424	-0.239917	0.127981	3.51424	3.63198	0.0566793	3.52602	-0.226472	0.122157	3.43712	3.57203	3.44846
rs190540459	17008048		T	G	0.000528176	0.000330142	0.307348	40424	-1.72863	1.00651	2.9496	3.6273	0.056839	3.10494	-1.90488	0.96349	3.90876	5.06054	4.19048
rs7033269	16513641		C	T	0.0892503	0.0855458	0.571221	40424	-0.0787035	0.0414984	3.59688	3.62423	0.0569439	3.59795	-0.0876772	0.039212	4.99959	5.04986	5.00153
rs12376135	16794418		C	A	0.0822246	0.0856748	0.743764	40424	0.0695875	0.0364368	3.64739	3.62351	0.0569686	3.64842	0.0485296	0.0346203	1.96495	1.9536	1.96524
rs189967935	17139434		G	A	0.00672416	0.00571372	0.818525	40424	-0.237416	0.12679	3.50634	3.6231	0.0569826	3.51803	-0.222912	0.121087	3.389	3.52075	3.40002
rs141865670	17117067		C	T	0.000251968	0.000194786	0.247056	40424	-2.39934	1.46975	2.66497	3.61953	0.057105	3.0755	-1.46931	1.38721	1.12187	1.35293	1.16603
rs10962777	16973031		T	C	0.0477527	0.0505654	0.964477	40424	0.0781625	0.0409318	3.64649	3.61519	0.0572542	3.64809	0.0654843	0.0389324	2.82912	2.8024	2.83008
rs10810786	17400370		C	G	0.56546	0.564754	0.87083	40424	0.0358302	0.0188546	3.61129	3.6141	0.0572917	3.61163	0.0262633	0.0179574	2.13901	2.1404	2.13912
rs1413419	17304101		G	A	0.129183	0.125119	0.939585	40424	-0.0512074	0.027032	3.58846	3.60706	0.0575347	3.58913	-0.0601197	0.0258266	5.41876	5.46009	5.42024
rs185169816	16955586		G	A	0.0055718	0.00465999	0.742149	40424	-0.274286	0.147163	3.47384	3.60492	0.0576088	3.48958	-0.264198	0.141021	3.50989	3.67127	3.52567
rs181128862	16642052		T	G	0.0013616	0.0011491	0.1419	40424	-1.27124	0.688017	3.41394	3.60471	0.0576161	3.44084	-1.53092	0.675309	5.13925	5.5382	5.18715
rs189216004	16657245		G	A	0.00293826	0.00333868	0.153403	40424	0.724942	0.377546	3.68695	3.60348	0.0576588	3.71058	0.938912	0.360649	6.77767	6.50109	6.85926
rs190370910	17376554		G	A	0.007941	0.00706357	0.696275	40424	-0.234028	0.125198	3.49413	3.60241	0.0576959	3.50449	-0.21313	0.119527	3.17947	3.29084	3.18808
rs147628496	17182415		A	G	0.000273881	0.000417517	0.274476	40424	1.74432	0.863708	4.07866	3.60203	0.0577091	4.53155	0.922868	0.784233	1.38481	1.29722	1.45245
rs74375224	16564264		T	C	0.0232211	0.0218692	0.416557	40424	-0.178375	0.0949773	3.5272	3.60107	0.0577424	3.53172	-0.16071	0.0895051	3.22397	3.29583	3.22787
rs115177946	17193696		T	G	0.00723956	0.00627697	0.760935	40424	-0.236213	0.126512	3.48612	3.60075	0.0577535	3.4975	-0.217791	0.120693	3.25624	3.37871	3.2662
rs188080112	16453258		G	A	0.00104257	0.00122593	0.162282	40424	1.15935	0.60414	3.68262	3.60044	0.0577643	3.85874	1.15728	0.566565	4.17233	3.93959	4.36681
rs147461171	17193715		T	G	0.00723952	0.00627692	0.760927	40424	-0.236204	0.126513	3.48578	3.6004	0.0577657	3.49717	-0.217788	0.120693	3.25612	3.37859	3.26608
rs138413189	17311269		C	T	0.00346791	0.00468021	0.367008	40424	0.404482	0.210931	3.6772	3.59725	0.0578752	3.70286	0.545348	0.204269	7.12762	6.88083	7.22186
rs10962960	17262401		G	C	0.128819	0.124649	0.95173	40424	-0.0510568	0.0269923	3.57788	3.59651	0.057901	3.57856	-0.0607308	0.0257885	5.54581	5.58883	5.54738
rs11543981	17260440		T	G	0.128817	0.12465	0.951705	40424	-0.0510184	0.0269924	3.57248	3.59106	0.0580912	3.57315	-0.0607082	0.0257886	5.54164	5.58461	5.5432
rs1927617	16572642		C	T	0.0750432	0.0745279	0.453251	40424	-0.0953083	0.0505451	3.55552	3.59086	0.0580982	3.55698	-0.0840337	0.047705	3.10299	3.13441	3.10402
rs116362552	17207567		G	A	0.00784238	0.00692403	0.706471	40424	-0.234603	0.125815	3.47695	3.58952	0.058145	3.48801	-0.211594	0.119869	3.11597	3.22851	3.12485
rs77224726	16560046		G	T	0.0231935	0.0218458	0.416934	40424	-0.178069	0.0949702	3.5156	3.5891	0.0581597	3.5201	-0.160443	0.0894982	3.21374	3.28525	3.21761
rs77675043	16560284		G	C	0.0231938	0.0218462	0.41693	40424	-0.178069	0.0949707	3.51558	3.58907	0.0581608	3.52007	-0.16041	0.089498	3.21243	3.2839	3.2163
rs79307802	16560822		T	C	0.0231948	0.0218478	0.416904	40424	-0.178062	0.0949715	3.51525	3.58873	0.0581727	3.51974	-0.16032	0.0894978	3.20885	3.2802	3.21271
rs636093	17273609		G	A	0.129213	0.125122	0.952876	40424	-0.0508874	0.0269343	3.5695	3.58798	0.0581989	3.57016	-0.0600983	0.0257342	5.45385	5.49562	5.45536
rs117725581	17229723		G	A	0.00145794	0.00129968	0.457894	40424	-0.648604	0.359069	3.2629	3.58687	0.0582378	3.34578	-0.355872	0.356604	0.995899	1.05337	1.00156
rs77514323	16529780		C	G	0.0222451	0.0206281	0.442476	40424	-0.176718	0.0943357	3.5092	3.58285	0.0583789	3.51372	-0.171474	0.0891165	3.70238	3.79226	3.70763
rs10668396	17357619		C	CAT	0.870279	0.874263	0.920555	40424	0.0514982	0.0272851	3.56232	3.58097	0.058445	3.56299	0.0603961	0.0260673	5.36815	5.40944	5.36963
rs188297939	17362020		G	C	0.000759949	0.000471296	0.410404	40424	-1.23119	0.714059	2.9729	3.58094	0.0584461	3.06082	-1.35394	0.661884	4.18441	5.25148	4.44483
rs77809209	16558163		G	A	0.0231783	0.0218319	0.417081	40424	-0.177851	0.0949789	3.50637	3.57956	0.0584946	3.51084	-0.160329	0.0895073	3.20854	3.27988	3.21241
rs187132587	17404838		C	T	0.00102996	0.00139592	0.291546	40424	0.839924	0.436561	3.70161	3.57825	0.0585408	3.78131	1.11423	0.414355	7.23104	6.78834	7.53044
rs141710884	16878517		G	A	0.00928285	0.00847487	0.805017	40424	-0.19554	0.104684	3.4891	3.57765	0.0585619	3.49621	-0.14027	0.100705	1.94012	1.98308	1.94244
rs2779763	17178681		G	A	0.144526	0.139012	0.92271	40424	-0.0494119	0.0261952	3.55812	3.5754	0.0586413	3.55873	-0.0594401	0.0249549	5.67344	5.71527	5.67495
rs16935395	17184637		A	G	0.00752024	0.00657673	0.736223	40424	-0.234344	0.125977	3.46041	3.57277	0.0587343	3.47147	-0.214728	0.120143	3.19431	3.3121	3.20376
rs1930639	17272891		C	G	0.128784	0.124655	0.95179	40424	-0.0508599	0.0269915	3.55056	3.56896	0.0588692	3.55122	-0.0602878	0.0257882	5.46532	5.50739	5.46684
[truncated: 5,045 more rows]

## Sheet: Conditional
snp	position	ref	alt	eafcontrols	eafcases	r2	numcalled	genotyped	or_1	se_1	lrt_1	pval	logp	pos_mb	or_adj	se_adj	lrt_adj	pval_adj	logp_adj
rs12551173	16916454	A	C	0.117971	0.114798	0.947931	40424	1	-0.0637	0.0277	5.29	0.0214	1.66959	16.9165	0.167327	0.0335557	24.7585	6.5e-07	6.18721
rs10962692	16915874	G	C	0.196625	0.1585	0.900951	40424	0	-0.278	0.024	134	5.25e-31	30.2798	16.9159	-0.161829	0.0346144	21.7989	3.03e-06	5.51888
rs7848057	16908609	G	A	0.118008	0.11346	0.984837	40424	1	-0.0802	0.0278	8.3	0.00397	2.40121	16.9086	0.15318	0.033314	21.0608	4.45e-06	5.3517
rs12376998	16909002	A	T	0.200113	0.160973	0.982113	40424	0	-0.276	0.0232	142	1.24e-32	31.9066	16.909	-0.150452	0.0331726	20.5032	5.95e-06	5.22525
rs4246133	16912919	A	G	0.119424	0.114318	0.966704	40424	0	-0.0825	0.0273	9.12	0.00252	2.5986	16.9129	0.151058	0.0335834	20.1583	7.13e-06	5.14697
rs80039758	16908383	C	G	0.199231	0.160485	0.970138	40424	0	-0.286	0.0244	137	1.3e-31	30.8861	16.9084	-0.149453	0.0332979	20.0835	7.41e-06	5.12998
rs199782476	16909476	A	AGCT	0.200273	0.161507	0.982635	40424	0	-0.272444	0.0233003	140.998	1.61e-32	31.793	16.9095	-0.148015	0.0331384	19.886	8.22e-06	5.08513
rs10962691	16915105	C	G	0.201581	0.162501	0.991981	40424	1	-0.275	0.0232	141	1.96e-32	31.7077	16.9151	-0.1487	0.0333965	19.7538	8.81e-06	5.05509
c9_pos16900214	16910214	A	C	0.200281	0.161224	0.996864	40424	1	-0.273	0.0232	139	4.44e-32	31.3526	16.9102	-0.147054	0.0331215	19.6453	9.32e-06	5.03043
rs10810666	16911666	C	T	0.199857	0.160888	0.999512	40424	1	-0.273	0.0232	139	5.42e-32	31.266	16.9117	-0.146379	0.0330941	19.4979	1.01e-05	4.99693
rs10810665	16911400	G	A	0.199666	0.160825	0.997706	40424	1	-0.273	0.0233	138	7.27e-32	31.1385	16.9114	-0.144855	0.0331341	19.0484	1.27e-05	4.89468
rs12377421	16913768	G	A	0.19838	0.159668	0.973352	40424	0	-0.274	0.0232	139	4.59e-32	31.3382	16.9138	-0.146583	0.0336693	18.8911	1.38e-05	4.85887
rs10810668	16912435	G	C	0.200055	0.16132	0.998372	40424	1	-0.272	0.0232	138	6.35e-32	31.1972	16.9124	-0.14348	0.0331348	18.6871	1.54e-05	4.81242
rs12377389	16913557	C	T	0.200042	0.161304	0.985369	40424	0	-0.272	0.0232	138	7.1e-32	31.1487	16.9136	-0.143879	0.0333651	18.5329	1.67e-05	4.77729
rs10962665	16891590	A	G	0.193986	0.157039	0.965804	40424	0	-0.264	0.0232	130	5.23e-30	29.2815	16.8916	-0.138831	0.0323393	18.4223	1.77e-05	4.75209
c9_pos16896889	16906889	T	C	0.197352	0.1599	0.993201	40424	1	-0.267	0.0233	131	2.64e-30	29.5784	16.9069	-0.138254	0.0323067	18.2838	1.9e-05	4.72052
rs10810669	16912661	C	T	0.200204	0.161507	0.996626	40424	1	-0.271	0.0232	137	1.13e-31	30.9469	16.9127	-0.14211	0.0332165	18.2422	1.95e-05	4.71103
rs10962670	16896588	C	T	0.197253	0.160424	0.978152	40424	0	-0.265	0.0232	130	3.41e-30	29.4672	16.8966	-0.136632	0.0319965	18.2226	1.97e-05	4.70657
rs10810670	16912663	C	T	0.200189	0.161507	0.996593	40424	1	-0.271	0.0232	137	1.25e-31	30.9031	16.9127	-0.141714	0.0332151	18.1424	2.05e-05	4.68828
c9_pos16894635	16904635	C	G	0.198429	0.161107	0.994691	40424	1	-0.264	0.0232	129	5.6e-30	29.2518	16.9046	-0.135684	0.0318785	18.0965	2.1e-05	4.67781
c9_pos16889285	16899285	T	C	0.19957	0.162459	0.991452	40424	1	-0.264	0.0232	130	3.95e-30	29.4034	16.8993	-0.1341	0.0316987	17.8832	2.35e-05	4.62914
rs62543619	16914716	G	A	0.197911	0.159705	0.971593	40424	0	-0.271	0.0237	132	1.76e-30	29.7545	16.9147	-0.143452	0.0338766	17.8733	2.36e-05	4.62688
rs10962664	16891561	T	C	0.196829	0.159732	0.980302	40424	0	-0.265	0.0232	131	2.88e-30	29.5406	16.8916	-0.134729	0.0319546	17.766	2.5e-05	4.60239
rs62543618	16914578	C	T	0.197107	0.15897	0.97137	40424	0	-0.281	0.0244	132	1.31e-30	29.8827	16.9146	-0.14291	0.0338743	17.7426	2.53e-05	4.59705
rs34606230	16903362	A	T	0.197238	0.16031	0.977238	40424	0	-0.264	0.0232	129	5.29e-30	29.2765	16.9034	-0.134402	0.0320997	17.5156	2.85e-05	4.54522
rs72713890	16906510	G	C	0.195806	0.158814	0.982406	40424	0	-0.264	0.0233	128	1.1e-29	28.9586	16.9065	-0.135992	0.0324842	17.4986	2.88e-05	4.54133
rs62543579	16905170	T	C	0.196201	0.159311	0.98348	40424	0	-0.263	0.0233	127	1.5e-29	28.8239	16.9052	-0.132375	0.0323605	16.7095	4.36e-05	4.36089
rs881557	16915644	C	A	0.0823683	0.080136	0.92608	40424	0	-0.0627	0.0323	3.76	0.0526	1.27901	16.9156	0.15332	0.0374269	16.6363	4.53e-05	4.34413
rs139327399	16906238	AC	A	0.196744	0.159813	0.987875	40424	0	-0.26309	0.0233861	130.365	3.41e-30	29.4673	16.9062	-0.131363	0.0322946	16.521	4.81e-05	4.31773
c9_pos16896152	16906152	A	G	0.197166	0.160178	0.993561	40424	1	-0.263	0.0233	127	1.76e-29	28.7545	16.9062	-0.130988	0.0322042	16.52	4.81e-05	4.3175
rs62543581	16906006	C	A	0.196336	0.159486	0.986496	40424	0	-0.263	0.0233	127	1.89e-29	28.7235	16.906	-0.131072	0.0323536	16.3884	5.16e-05	4.28735
c9_pos16896307	16906307	A	G	0.197114	0.160187	0.993462	40424	1	-0.263	0.0233	127	1.84e-29	28.7352	16.9063	-0.130491	0.032214	16.3848	5.17e-05	4.28653
c9_pos16896094	16906094	C	T	0.197106	0.160191	0.993586	40424	1	-0.262	0.0233	127	1.93e-29	28.7144	16.9061	-0.130331	0.0322052	16.3538	5.26e-05	4.27942
rs10756825	16883563	C	G	0.918074	0.919514	0.997783	40424	1	0.0528	0.0318	2.75	0.0973	1.01189	16.8836	-0.143298	0.0356268	16.03	6.23e-05	4.20519
rs200582213	16914557	T	TTTC	0.0833584	0.0802724	0.930557	40424	0	-0.0771013	0.0329483	5.52434	0.0187537	1.72691	16.9146	0.14746	0.0376546	15.2092	9.62e-05	4.01667
rs10962666	16892272	G	A	0.199611	0.16311	0.987632	40424	1	-0.26	0.0232	126	3.87e-29	28.4123	16.8923	-0.124109	0.0318536	15.1698	9.83e-05	4.00761
rs34097600	16915716	G	T	0.0804707	0.0778161	0.923199	40424	0	-0.0658	0.0326	4.06	0.0438	1.35853	16.9157	0.148027	0.0378419	15.1697	9.83e-05	4.00759
rs201811110	16914558	T	TTC	0.0821766	0.0792775	0.941902	40424	0	-0.0749562	0.0329416	5.22212	0.0223013	1.65167	16.9146	0.145975	0.0375211	15.0102	0.0001069	3.97089
rs200286088	16914559	T	TC	0.0821281	0.0792348	0.941675	40424	0	-0.0750234	0.0329524	5.22812	0.0222245	1.65317	16.9146	0.145963	0.0375329	14.9983	0.0001076	3.96815
rs10756823	16878616	C	A	0.238598	0.199058	0.980786	40424	0	-0.254	0.0216	138	8.86e-32	31.0526	16.8786	-0.12375	0.0320336	14.8903	0.0001139	3.94329
chr916914556	16914556	T	TTTTC	0.084241	0.0808923	0.926653	40424	0	-0.0800574	0.0329	5.97556	0.0145055	1.83847	16.9146	0.145668	0.0376762	14.8278	0.0001178	3.9289
rs4436220	16894953	C	T	0.918002	0.919974	0.991005	40424	1	0.0612	0.0322	3.62	0.0572	1.2426	16.895	-0.139227	0.0360547	14.7833	0.0001206	3.91866
rs10124837	16891647	C	T	0.761049	0.80045	0.973106	40424	0	0.251	0.0215	135	2.72e-31	30.5654	16.8916	0.125186	0.0327528	14.5689	0.0001351	3.86926
rs10962662	16889937	C	A	0.236414	0.196601	0.994407	40424	1	-0.251	0.0216	136	2.08e-31	30.6819	16.8899	-0.123369	0.0324072	14.4515	0.0001438	3.84219
rs5896720	16890387	A	AT	0.916499	0.918483	0.949378	40424	0	0.0652126	0.0324433	4.07055	0.0436371	1.36014	16.8904	-0.138593	0.036429	14.3498	0.0001518	3.81874
rs1416745	16911091	C	G	0.0823824	0.0794579	0.986921	40424	1	-0.0691	0.0322	4.6	0.0319	1.49621	16.9111	0.13865	0.036485	14.3228	0.000154	3.81251
rs183993950	16907676	A	G	0.0346483	0.0260877	0.399918	40424	0	-0.304	0.0405	56.2	6.64e-14	13.1778	16.9077	-0.355908	0.0955795	14.2837	0.0001572	3.80349
rs1537001	16676967	C	A	0.0695804	0.0780238	0.488747	40424	0	0.162	0.0396	16.7	4.38e-05	4.35853	16.677	0.178144	0.0471874	14.0641	0.0001767	3.7528
rs56356837	16908104	A	ACAT	0.0825126	0.079717	0.961121	40424	0	-0.0725432	0.032398	5.05618	0.0245383	1.61016	16.9081	0.13797	0.0366754	14.0352	0.0001794	3.74613
rs4436219	16894803	C	T	0.918428	0.920704	0.994	40424	1	0.064	0.0322	3.95	0.047	1.3279	16.8948	-0.134961	0.0361178	13.8451	0.0001985	3.70221
rs71513279	16894688	C	T	0.0808581	0.0784898	0.97821	40424	0	-0.0636	0.0322	3.89	0.0485	1.31426	16.8947	0.136069	0.0365072	13.7747	0.0002061	3.68594
rs76718132	16907675	C	T	0.0347877	0.0262943	0.399008	40424	0	-0.245	0.0236	108	3.24e-25	24.4895	16.9077	-0.347466	0.0954481	13.6386	0.0002216	3.65446
rs147777677	16883801	TAA	T	0.0791322	0.0768587	0.968517	40424	0	-0.0680717	0.0330207	4.28317	0.0384915	1.41464	16.8838	0.137271	0.0370331	13.6212	0.0002236	3.65044
rs34358697	16899083	T	C	0.0814268	0.079078	0.991869	40424	1	-0.0626	0.0322	3.77	0.0521	1.28316	16.8991	0.134191	0.036213	13.6168	0.0002242	3.64942
rs71513275	16882161	T	G	0.0790012	0.0766955	0.971448	40424	0	-0.0643	0.0322	3.98	0.0461	1.3363	16.8822	0.136568	0.0370126	13.4975	0.0002389	3.62182
rs4388546	16890849	T	A	0.918283	0.92028	0.969536	40424	0	0.0607	0.0322	3.55	0.0594	1.22621	16.8909	-0.133726	0.0362534	13.4915	0.0002396	3.62043
rs36021466	16880291	G	T	0.0801651	0.0779019	0.978628	40424	0	-0.0643	0.0322	3.98	0.0459	1.33819	16.8803	0.134105	0.036532	13.3613	0.0002569	3.59029
rs34919930	16895222	G	A	0.0812096	0.0788132	0.994033	40424	1	-0.064	0.0323	3.92	0.0476	1.32239	16.8952	0.132837	0.0362219	13.3374	0.0002602	3.58475
rs71513276	16882414	G	A	0.0802657	0.0779623	0.977528	40424	0	-0.0639	0.0322	3.94	0.0472	1.32606	16.8824	0.133865	0.0365429	13.3063	0.0002645	3.57755
rs13300696	16892517	G	A	0.0813039	0.0792177	0.995588	40424	1	-0.0634	0.0322	3.86	0.0493	1.30715	16.8925	0.132051	0.0360749	13.2878	0.0002671	3.57326
rs35386000	16880946	C	G	0.0823025	0.0801827	0.99742	40424	1	-0.0604	0.0318	3.6	0.0577	1.23882	16.8809	0.129648	0.035422	13.2793	0.0002684	3.57129
rs10738461	16891619	G	C	0.918815	0.921	0.979675	40424	0	0.0638	0.0322	3.92	0.0476	1.32239	16.8916	-0.132379	0.0362258	13.2425	0.0002737	3.56277
rs12684800	16893054	A	G	0.0805512	0.0782228	0.97857	40424	0	-0.0615	0.0329	3.49	0.0619	1.20831	16.893	0.133364	0.0365249	13.2209	0.0002768	3.55776
rs71513274	16877565	G	A	0.0806648	0.0784649	0.975317	40424	0	-0.0637	0.0322	3.9	0.0482	1.31695	16.8776	0.133125	0.0364725	13.2104	0.0002784	3.55533
rs10756828	16892590	A	T	0.918593	0.920748	0.995408	40424	1	0.064	0.0322	3.95	0.047	1.3279	16.8926	-0.131456	0.0360393	13.1944	0.0002808	3.55162
rs13295308	16891877	C	A	0.0812853	0.0790694	0.995751	40424	1	-0.0645	0.0322	4	0.0455	1.34199	16.8919	0.131003	0.0360807	13.0742	0.0002994	3.52376
rs10962534	16675849	C	G	0.101602	0.111638	0.495211	40424	0	0.12	0.0346	12.1	0.000511	3.29158	16.6759	0.144799	0.0399009	13.0382	0.0003052	3.51541
rs7868212	16881914	G	A	0.0813407	0.0790487	0.999925	40424	1	-0.0647	0.0322	4.04	0.0445	1.35164	16.8819	0.130534	0.0360039	13.0357	0.0003056	3.51483
rs7027849	16873045	A	G	0.0813512	0.0793606	0.986682	40424	1	-0.0652	0.0323	4.08	0.0434	1.36251	16.873	0.130887	0.0361302	13.015	0.000309	3.51003
rs12552675	16903240	C	T	0.0809436	0.0781365	0.950465	40424	0	-0.0678	0.0332	4.16	0.0413	1.38405	16.9032	0.134332	0.0370932	13.0075	0.0003102	3.50829
rs10544302	16876382	CCTG	C	0.0802837	0.0780447	0.973487	40424	0	-0.0682171	0.032665	4.3957	0.0360297	1.44334	16.8764	0.132272	0.0365564	12.9825	0.0003144	3.5025
rs35483590	16893883	A	C	0.0821634	0.0804857	0.995539	40424	1	-0.0633	0.032	3.9	0.0482	1.31695	16.8939	0.129365	0.0357729	12.9716	0.0003163	3.49997
rs13289064	16897685	G	C	0.0808158	0.0783286	0.99182	40424	1	-0.0655	0.0323	4.11	0.0426	1.37059	16.8977	0.131315	0.0363356	12.9531	0.0003194	3.49568
rs7868424	16876106	G	C	0.0805155	0.0783036	0.977853	40424	0	-0.0657	0.0323	4.15	0.0417	1.37986	16.8761	0.131673	0.0364412	12.9472	0.0003204	3.49431
rs12552688	16903374	C	T	0.0822265	0.079435	0.945279	40424	0	-0.0528	0.0331	2.55	0.11	0.958607	16.9034	0.133208	0.0369051	12.9226	0.0003246	3.4886
rs7044899	16873586	T	C	0.0812419	0.0792368	0.990561	40424	1	-0.0653	0.0323	4.09	0.0431	1.36552	16.8736	0.129874	0.0360796	12.8508	0.0003373	3.47194
rs7864745	16875622	C	T	0.0816051	0.0794638	0.986521	40424	1	-0.0602	0.0322	3.5	0.0614	1.21183	16.8756	0.129327	0.0361	12.7286	0.0003601	3.44357
rs7021921	16880833	T	C	0.0815406	0.079678	0.997852	40424	1	-0.0651	0.0322	4.1	0.0429	1.36754	16.8808	0.127432	0.0358987	12.4996	0.000407	3.39036
rs7864210	16875274	A	G	0.0815034	0.0792976	0.990123	40424	1	-0.0666	0.0323	4.26	0.039	1.40894	16.8753	0.127796	0.0361042	12.4276	0.000423	3.37362
rs13296025	16900507	G	C	0.0774502	0.0744246	0.936303	40424	0	-0.0604	0.0348	3.01	0.0828	1.08197	16.9005	0.133337	0.0381215	12.1318	0.0004957	3.30479
rs7046326	16847520	G	A	0.246033	0.207203	0.995887	40424	1	-0.232	0.0211	121	4.77e-28	27.3215	16.8475	-0.102282	0.0297353	11.8317	0.0005823	3.23485
rs7046433	16877987	A	G	0.838424	0.82751	0.999201	40424	1	-0.0306	0.0232	1.73	0.189	0.723538	16.878	-0.081232	0.0236458	11.7291	0.0006153	3.21091
rs67956400	16888249	GA	G	0.0805734	0.0777474	0.961736	40424	0	-0.0749105	0.0328993	5.22971	0.0222042	1.65356	16.8882	0.126107	0.0368339	11.6273	0.0006499	3.18715
rs10810656	16877758	C	T	0.838491	0.827679	0.999967	40424	1	-0.0295	0.0232	1.61	0.204	0.69037	16.8778	-0.0807179	0.0236488	11.5785	0.0006672	3.17575
rs7868157	16851977	C	A	0.759026	0.797486	0.978274	40424	0	0.235	0.0213	122	2.32e-28	27.6345	16.852	0.102792	0.0302232	11.5646	0.0006722	3.17251
rs16934899	16671439	G	C	0.0718573	0.0788194	0.476706	40424	0	0.145	0.0404	12.9	0.000327	3.48545	16.6714	0.162039	0.0474727	11.5065	0.0006935	3.15893
rs61336812	16671540	A	T	0.073389	0.080437	0.478124	40424	0	0.149	0.0398	14	0.000183	3.73755	16.6715	0.160211	0.0469592	11.4975	0.0006969	3.15683
rs1981224	16880465	A	G	0.837895	0.827155	0.980274	40424	0	-0.028	0.0232	1.45	0.229	0.640165	16.8805	-0.0804712	0.0236682	11.4895	0.0006999	3.15496
c9_pos16895922	16905922	G	A	0.197483	0.161336	0.999174	28728	1	-0.255	0.0271	88.6	4.93e-21	20.3072	16.9059	-0.126612	0.0374191	11.4367	0.0007201	3.14262
rs10962655	16877368	C	A	0.836852	0.825889	0.982046	40424	0	-0.0303	0.0233	1.69	0.193	0.714443	16.8774	-0.0798876	0.0235548	11.4334	0.0007214	3.14185
rs10810654	16876998	T	C	0.837266	0.826329	0.983035	40424	0	-0.0301	0.0233	1.67	0.196	0.707744	16.877	-0.0798132	0.0235479	11.4189	0.000727	3.13846
rs4612477	16877254	C	G	0.838655	0.827934	0.986879	40424	0	-0.0328	0.0232	2.01	0.156	0.806875	16.8773	-0.0801506	0.0236943	11.373	0.0007452	3.12773
rs3814114	16915028	C	A	0.0572786	0.0563848	0.972203	40424	1	-0.0551	0.0378	2.12	0.145	0.838632	16.915	0.139296	0.041434	11.1761	0.0008286	3.08167
rs4961501	16851678	T	G	0.750968	0.788832	0.960054	40424	0	0.23	0.0212	118	1.7e-27	26.7695	16.8517	0.101644	0.0305458	11.071	0.0008769	3.05706
rs10810672	16914846	G	A	0.056274	0.0552186	0.936546	40424	0	-0.0564	0.0379	2.22	0.137	0.863279	16.9149	0.141854	0.0425882	10.9692	0.0009264	3.03321
rs34045498	16661480	G	GT	0.0968874	0.106412	0.484304	40424	0	0.142836	0.0411518	11.9315	0.0005519	3.25812	16.6615	0.137106	0.0412318	10.9559	0.0009331	3.03009
rs201659636	16661478	A	AG	0.0968875	0.106412	0.484303	40424	0	0.142824	0.0411518	11.9296	0.0005525	3.25767	16.6615	0.137094	0.0412318	10.954	0.000934	3.02964
rs2153272	16890517	C	T	0.8375	0.826646	0.995324	40424	1	-0.0276	0.0232	1.41	0.235	0.628932	16.8905	-0.0783959	0.0236332	10.9384	0.0009419	3.02599
rs71513271	16870472	A	G	0.084733	0.0824769	0.93756	40424	0	-0.0703	0.0321	4.8	0.0284	1.54668	16.8705	0.118046	0.0357877	10.795	0.0010177	2.99236
rs7860104	16661210	A	G	0.0977264	0.107239	0.485346	40424	0	0.109	0.0351	9.6	0.00194	2.7122	16.6612	0.135111	0.041047	10.7373	0.00105	2.97882
rs77795022	16907997	T	G	0.217911	0.180476	0.925064	40424	0	-0.296	0.0266	125	6.31e-29	28.2	16.908	-0.118606	0.0367798	10.3487	0.0012957	2.88751
rs72117843	16907999	TTA	T	0.223814	0.185887	0.93231	40424	0	-0.260918	0.0226991	135.63	2.4e-31	30.6191	16.908	-0.118647	0.0369919	10.2308	0.0013811	2.85976
rs35656943	16870182	TC	T	0.0778978	0.0764077	0.890861	40424	0	-0.06747	0.0341798	3.92578	0.0475511	1.32284	16.8702	0.120217	0.0374872	10.1976	0.0014062	2.85194
c9_pos16904560	16914560	A	G	0.0854654	0.0840085	0.991284	28728	1	-0.0687	0.0371	3.43	0.0641	1.19314	16.9146	0.133495	0.0417709	10.1395	0.0014513	2.83826
rs7847749	16908692	A	G	0.0552145	0.0540457	0.949204	40424	0	-0.0601	0.0384	2.45	0.117	0.931814	16.9087	0.134848	0.0424395	9.9827	0.0015802	2.80129
rs10810647	16853779	C	T	0.755985	0.793936	0.983948	40424	0	0.229	0.0211	117	2.98e-27	26.5258	16.8538	0.0947159	0.030223	9.81756	0.0017285	2.76232
rs12683916	16902548	G	C	0.0543554	0.053346	0.93843	40424	0	-0.0526	0.0388	1.84	0.175	0.756962	16.9026	0.134865	0.0428379	9.79972	0.0017454	2.75811
rs117134974	16902308	C	T	0.054514	0.053501	0.939837	40424	0	-0.0522	0.0387	1.82	0.177	0.752027	16.9023	0.133928	0.0427421	9.70815	0.0018345	2.73648
rs3927679	16895072	C	A	0.0533746	0.0523432	0.946504	40424	0	-0.0457	0.0387	1.4	0.238	0.623423	16.8951	0.133943	0.0429752	9.60461	0.0019409	2.712
rs34393116	16904735	G	A	0.0558074	0.0547963	0.937051	40424	0	-0.0553	0.0386	2.06	0.152	0.818156	16.9047	0.131463	0.0424267	9.49521	0.0020601	2.68611
rs10962590	16785478	C	G	0.692342	0.674111	0.932196	40424	0	-0.0743	0.0192	15	0.000109	3.96257	16.7855	-0.0598514	0.0194516	9.44429	0.0021181	2.67406
rs5001567	16906005	T	C	0.0563167	0.0552879	0.941057	40424	0	-0.0559	0.0385	2.1	0.147	0.832683	16.906	0.129532	0.0421792	9.3281	0.0022567	2.64653
rs72704092	16677803	A	T	0.100364	0.110144	0.508502	40424	0	0.0998	0.0341	8.55	0.00345	2.46218	16.6778	0.120686	0.039534	9.24097	0.0023666	2.62588
rs10810628	16787406	T	C	0.696925	0.679381	0.933519	40424	0	-0.0737	0.0193	14.5	0.000137	3.86328	16.7874	-0.0592515	0.0195362	9.17549	0.0024528	2.61034
rs12376099	16889023	G	A	0.145391	0.118615	0.946066	40424	0	-0.253	0.0262	93.6	3.79e-22	21.4214	16.889	-0.100313	0.0332077	9.1521	0.0024843	2.60479
rs5001566	16905616	T	A	0.0500972	0.0495867	0.857829	40424	0	-0.0648	0.0399	2.65	0.104	0.982967	16.9056	0.140542	0.0463227	9.10029	0.0025557	2.59249
rs10810629	16787786	T	C	0.69428	0.676632	0.920802	40424	0	-0.0731	0.0194	14.3	0.000159	3.7986	16.7878	-0.0592125	0.0196348	9.07174	0.0025959	2.58571
rs11795031	16786930	G	A	0.692552	0.674599	0.933735	40424	0	-0.0734	0.0193	14.5	0.000141	3.85078	16.7869	-0.0585615	0.01947	9.0249	0.0026633	2.57459
rs10962659	16883318	G	C	0.151527	0.123991	0.983539	40424	0	-0.246	0.0257	91.2	1.28e-21	20.8928	16.8833	-0.0959461	0.0320343	8.99426	0.0027083	2.56731
rs10962638	16846111	G	A	0.158574	0.131063	0.961019	40424	0	-0.23	0.0253	82.3	1.16e-19	18.9355	16.8461	-0.0923403	0.0308569	8.98708	0.002719	2.5656
rs62541927	16888222	C	G	0.145652	0.119194	0.945261	40424	0	-0.257	0.0267	92.5	6.59e-22	21.1811	16.8882	-0.0989588	0.0331275	8.94973	0.0027751	2.55672
rs10756812	16786303	G	A	0.695582	0.677879	0.936031	40424	0	-0.0738	0.0192	14.7	0.000124	3.90658	16.7863	-0.0582733	0.0194732	8.93288	0.0028008	2.55271
rs10962658	16881346	G	A	0.152498	0.12501	0.98457	40424	0	-0.245	0.0257	90.7	1.67e-21	20.7773	16.8814	-0.0950654	0.0318896	8.91036	0.0028356	2.54736
rs3927678	16895146	C	T	0.0527029	0.0514025	0.943384	40424	0	-0.0484	0.0389	1.55	0.213	0.67162	16.8952	0.129746	0.0433301	8.86709	0.0029036	2.53707
rs3814112	16914967	T	C	0.948143	0.949563	0.900318	40424	0	0.0692	0.0395	3.06	0.08	1.09691	16.915	-0.13438	0.0449394	8.84368	0.0029411	2.5315
rs13290171	16876651	G	A	0.0525561	0.0516224	0.936808	40424	0	-0.0532	0.0391	1.85	0.173	0.761954	16.8767	0.129498	0.0433885	8.80983	0.0029961	2.52344
rs140047332	16877723	GC	G	0.151743	0.124278	0.993395	40424	0	-0.24302	0.0257809	91.5636	1.08e-21	20.9663	16.8777	-0.0938431	0.0317477	8.76036	0.0030785	2.51166
rs62541926	16877423	T	C	0.151726	0.124264	0.992432	40424	0	-0.245	0.0257	90.9	1.53e-21	20.8153	16.8774	-0.0938187	0.0317573	8.75048	0.0030952	2.50931
rs10962653	16876736	T	C	0.151686	0.124233	0.990602	40424	0	-0.244	0.0257	90.5	1.87e-21	20.7282	16.8767	-0.0937039	0.0317779	8.71773	0.0031513	2.50151
rs10962656	16877788	G	A	0.152141	0.124966	0.999142	40424	1	-0.245	0.0257	91	1.45e-21	20.8386	16.8778	-0.0931835	0.0316149	8.70993	0.0031648	2.49965
rs12377036	16933700	T	C	0.102843	0.0841227	0.998653	40424	1	-0.19	0.0308	38.1	6.64e-10	9.17783	16.9337	-0.0935367	0.0318915	8.68915	0.0032011	2.4947
rs10962724	16932860	C	T	0.102028	0.0834385	0.989832	40424	0	-0.19	0.0308	38	7.12e-10	9.14752	16.9329	-0.093888	0.0321149	8.63358	0.0033002	2.48146
c9_pos16944214	16954214	C	A	0.102851	0.084434	0.996827	40424	1	-0.191	0.0308	38.4	5.72e-10	9.2426	16.9542	-0.0929642	0.0318338	8.61399	0.0033359	2.47679
rs79603776	16932537	C	T	0.102112	0.083533	0.989591	40424	0	-0.19	0.0308	37.9	7.32e-10	9.13549	16.9325	-0.0935918	0.0320892	8.59263	0.0033753	2.47169
rs10962595	16792126	G	C	0.84349	0.835838	0.929119	40424	0	-0.0732	0.0244	8.97	0.00275	2.56067	16.7921	-0.0726203	0.0247546	8.55561	0.0034446	2.46286
c9_pos16875464	16885464	A	G	0.152067	0.12449	0.996063	40424	1	-0.245	0.0257	91	1.4e-21	20.8539	16.8855	-0.0927646	0.0317668	8.54887	0.0034574	2.46125
rs10756816	16791894	A	C	0.843438	0.835794	0.927744	40424	0	-0.0736	0.0245	9.04	0.00265	2.57675	16.7919	-0.0725428	0.0247673	8.52867	0.003496	2.45643
rs10962723	16932086	C	G	0.102763	0.0841399	0.998427	40424	1	-0.189	0.0308	37.8	7.68e-10	9.11464	16.9321	-0.0926687	0.0318931	8.52686	0.0034994	2.456
rs117255122	16930305	G	C	0.102247	0.0837605	0.98423	40424	0	-0.188	0.0308	37.1	1.1e-09	8.95861	16.9303	-0.0933919	0.0321485	8.52415	0.0035046	2.45536
rs141242427	16937991	C	T	0.0991441	0.0815109	0.984946	40424	0	-0.188	0.0308	37.4	9.86e-10	9.00612	16.938	-0.0940867	0.032482	8.47656	0.0035975	2.444
rs149410398	16929313	T	C	0.102473	0.0840198	0.982454	40424	0	-0.187	0.0308	36.7	1.38e-09	8.86012	16.9293	-0.0931089	0.0321517	8.47054	0.0036094	2.44256
rs11789875	16872323	G	A	0.151976	0.124621	0.98486	40424	0	-0.243	0.0257	89.4	3.17e-21	20.4989	16.8723	-0.0921177	0.0318083	8.40879	0.0037341	2.42781
rs79844200	16940825	T	C	0.0992749	0.0816496	0.986431	40424	0	-0.186	0.0311	35.9	2.07e-09	8.68403	16.9408	-0.0935477	0.0324261	8.40807	0.0037356	2.42764
rs200648906	16871360	C	CG	0.152102	0.124745	0.982157	40424	0	-0.242359	0.0258656	90.448	1.9e-21	20.7215	16.8714	-0.0921166	0.0318315	8.39642	0.0037596	2.42486
rs12378078	16945241	C	T	0.099484	0.0818554	0.989033	40424	0	-0.187	0.0311	36.4	1.6e-09	8.79588	16.9452	-0.0932685	0.0323568	8.3935	0.0037657	2.42416
rs10962750	16944135	G	A	0.0995038	0.0818739	0.989118	40424	0	-0.187	0.0311	36.3	1.65e-09	8.78252	16.9441	-0.0932458	0.0323563	8.38969	0.0037736	2.42325
rs62541923	16870501	C	A	0.152329	0.124972	0.980719	40424	0	-0.242	0.0257	88.4	5.34e-21	20.2725	16.8705	-0.0920349	0.031827	8.38397	0.0037854	2.42188
c9_pos16940269	16950269	G	C	0.102933	0.0845899	0.99682	40424	1	-0.19	0.0307	38.1	6.86e-10	9.16368	16.9503	-0.0916289	0.0318198	8.3743	0.0038056	2.41957
rs62541922	16870182	T	C	0.152264	0.12491	0.981407	40424	0	-0.238	0.0256	85.9	1.87e-20	19.7282	16.8702	-0.0917624	0.0318155	8.34033	0.0038775	2.41145
rs10962757	16947148	G	C	0.100248	0.08261	0.997657	40424	1	-0.187	0.0311	36.3	1.73e-09	8.76195	16.9472	-0.0921284	0.0321068	8.31649	0.0039287	2.40575
c9_pos16912173	16922173	T	A	0.102406	0.0838974	0.996951	40424	1	-0.187	0.0308	37	1.21e-09	8.91721	16.9222	-0.0914493	0.0319691	8.26315	0.0040458	2.393
rs118072440	16952486	C	T	0.10182	0.0835765	0.985171	40424	0	-0.19	0.0308	38.1	6.75e-10	9.1707	16.9525	-0.091825	0.0321466	8.24037	0.0040969	2.38755
rs10962652	16874878	A	G	0.150438	0.123337	0.979545	40424	0	-0.244	0.0257	90	2.33e-21	20.6326	16.8749	-0.0916495	0.0320325	8.20744	0.0041719	2.37967
rs201591113	16874877	A	AG	0.150438	0.123337	0.979545	40424	0	-0.243171	0.0260382	89.8535	2.56e-21	20.591	16.8749	-0.0916446	0.0320325	8.20658	0.0041739	2.37946
rs10962745	16941719	G	T	0.100308	0.0826251	0.998162	40424	1	-0.186	0.0311	35.7	2.28e-09	8.64207	16.9417	-0.0914533	0.0321047	8.19538	0.0041997	2.37678
rs10962699	16920050	G	A	0.101777	0.0834016	0.990527	40424	0	-0.187	0.0308	36.9	1.26e-09	8.89963	16.92	-0.0914794	0.0321267	8.18771	0.0042175	2.37494
rs10962700	16920785	C	A	0.102173	0.083782	0.996884	40424	1	-0.187	0.0308	36.8	1.3e-09	8.88606	16.9208	-0.0910511	0.0319846	8.18319	0.004228	2.37386
rs10962720	16931441	A	G	0.102761	0.0842579	0.998476	40424	1	-0.188	0.0308	37.4	9.82e-10	9.00789	16.9314	-0.0907213	0.0318808	8.17678	0.004243	2.37233
rs201633449	16918175	AT	A	0.101601	0.0832187	0.988229	40424	0	-0.182526	0.0310656	35.3358	2.77e-09	8.55676	16.9182	-0.0916404	0.032206	8.17625	0.0042442	2.3722
rs10962766	16956687	G	T	0.101556	0.0834416	0.98442	40424	0	-0.189	0.0308	37.5	8.98e-10	9.04672	16.9567	-0.0915148	0.0321879	8.16361	0.0042739	2.36917
rs7046749	16877973	G	C	0.86811	0.856253	0.96655	40424	0	-0.0521	0.0249	4.39	0.0361	1.44249	16.878	-0.0727917	0.0254393	8.13507	0.0043417	2.36234
rs10962761	16949644	G	C	0.101935	0.0837116	0.986947	40424	0	-0.189	0.0308	37.9	7.62e-10	9.11805	16.9496	-0.0910547	0.0321026	8.12421	0.0043678	2.35974
rs10962719	16931410	T	C	0.102745	0.0842601	0.998499	40424	1	-0.188	0.0308	37.2	1.04e-09	8.98297	16.9314	-0.0903335	0.031883	8.10551	0.0044131	2.35526
rs10962698	16919692	C	T	0.102232	0.0838256	0.996643	40424	1	-0.187	0.0308	36.6	1.41e-09	8.85078	16.9197	-0.0906007	0.03199	8.09919	0.0044285	2.35374
rs55816722	16926894	AC	A	0.102072	0.0836941	0.988645	40424	0	-0.180748	0.0309543	34.8908	3.49e-09	8.45752	16.9269	-0.0907984	0.0320711	8.09372	0.0044419	2.35243
rs10962701	16923304	G	A	0.101938	0.0835865	0.989939	40424	0	-0.186	0.0308	36.6	1.48e-09	8.82974	16.9233	-0.0907931	0.0320859	8.0853	0.0044626	2.35041
rs4378062	16779899	G	T	0.838332	0.829993	0.859484	40424	0	-0.0796	0.0244	10.6	0.00114	2.9431	16.7799	-0.0723187	0.0253779	8.07587	0.0044859	2.34816
rs10810633	16790956	G	A	0.842131	0.83426	0.918462	40424	0	-0.0725	0.0244	8.8	0.003	2.52288	16.791	-0.0706382	0.0247862	8.07581	0.004486	2.34814
rs140816514	16926301	A	G	0.102004	0.0836427	0.988361	40424	0	-0.186	0.0308	36.5	1.52e-09	8.81816	16.9263	-0.0907343	0.0320849	8.07527	0.0044873	2.34801
rs10962703	16923585	T	G	0.101915	0.0835711	0.99018	40424	0	-0.186	0.0308	36.5	1.51e-09	8.82102	16.9236	-0.0907236	0.0320921	8.06973	0.0045011	2.34668
rs80006137	16948819	A	G	0.101971	0.0837698	0.984505	40424	0	-0.19	0.0308	38	7.25e-10	9.13966	16.9488	-0.0907467	0.0321122	8.06411	0.0045151	2.34534
rs10962532	16674632	A	G	0.0978924	0.106625	0.486442	40424	0	0.108	0.036	8.97	0.00275	2.56067	16.6746	0.116638	0.0409994	8.02786	0.0046063	2.33665
rs10962649	16873535	C	T	0.152419	0.125084	0.995503	40424	1	-0.243	0.0257	89.5	3.1e-21	20.5086	16.8735	-0.0895787	0.0316563	8.02723	0.0046079	2.3365
rs10962695	16918296	G	A	0.102241	0.0838675	0.996323	40424	1	-0.186	0.0308	36.5	1.5e-09	8.82391	16.9183	-0.0901175	0.031994	8.01052	0.0046506	2.33249
rs150330757	16926130	C	G	0.101303	0.0830535	0.982447	40424	0	-0.186	0.0309	36.3	1.67e-09	8.77728	16.9261	-0.0908871	0.0322906	7.99951	0.004679	2.32985
c9_pos16932917	16942917	A	G	0.100267	0.0826771	0.998536	40424	1	-0.184	0.0311	35.3	2.84e-09	8.54668	16.9429	-0.0903148	0.0320992	7.99438	0.0046923	2.32862
rs10962706	16925359	T	C	0.101254	0.0830173	0.983144	40424	0	-0.186	0.0309	36.3	1.67e-09	8.77728	16.9254	-0.0908261	0.0322969	7.98561	0.0047151	2.32651
rs201858371	16948217	TC	T	0.101865	0.0837376	0.982152	40424	0	-0.180264	0.0310161	34.5656	4.12e-09	8.38497	16.9482	-0.0900635	0.0321358	7.93079	0.0048601	2.31336
rs56251924	16962982	T	C	0.101159	0.0833981	0.970148	40424	0	-0.183	0.0307	35.7	2.26e-09	8.64589	16.963	-0.0904219	0.0322822	7.92293	0.0048812	2.31147
rs10962704	16923927	C	A	0.10263	0.084317	0.995772	40424	1	-0.187	0.0308	36.8	1.28e-09	8.89279	16.9239	-0.089382	0.0319147	7.91884	0.0048923	2.31049
rs200465295	16938577	A	AG	0.102223	0.0839588	0.988064	40424	0	-0.179984	0.030941	34.6233	4e-09	8.39784	16.9386	-0.0897801	0.0320636	7.91604	0.0048998	2.30982
rs141012013	16938587	A	G	0.102222	0.0839592	0.98807	40424	0	-0.187	0.0308	37	1.17e-09	8.93181	16.9386	-0.0897739	0.0320635	7.91499	0.0049027	2.30957
rs183360869	16938688	A	T	0.102221	0.0839596	0.988121	40424	0	-0.187	0.0308	37	1.18e-09	8.92812	16.9387	-0.0897571	0.0320632	7.91215	0.0049104	2.30888
rs12344799	16780344	G	T	0.687545	0.670684	0.92216	40424	0	-0.0716	0.0193	13.7	0.00021	3.67778	16.7803	-0.0547207	0.0194625	7.88734	0.0049782	2.30293
rs55978425	16964978	G	C	0.100059	0.0818817	0.976008	40424	0	-0.188	0.031	36.7	1.35e-09	8.86967	16.965	-0.090703	0.0325074	7.86276	0.0050463	2.29702
rs117917159	16965616	T	C	0.10006	0.0818921	0.97662	40424	0	-0.188	0.031	36.9	1.25e-09	8.90309	16.9656	-0.0905283	0.0324989	7.83644	0.0051203	2.2907
rs10962707	16927732	T	C	0.102789	0.0844071	0.99555	40424	1	-0.184	0.0307	35.6	2.37e-09	8.62525	16.9277	-0.0888197	0.031902	7.82532	0.0051519	2.28803
rs56134369	16964849	C	G	0.100115	0.0819508	0.975776	40424	0	-0.188	0.031	36.8	1.34e-09	8.87289	16.9648	-0.0904254	0.0324959	7.81997	0.0051672	2.28674
rs111414393	16534282	C	T	0.0132747	0.0143997	0.24764	40424	0	0.243	0.0937	6.73	0.00949	2.02273	16.5343	0.416628	0.14736	7.81534	0.0051805	2.28563
rs10962788	16980043	A	G	0.101263	0.0831301	0.999525	40424	1	-0.185	0.0309	35.9	2.03e-09	8.6925	16.98	-0.088702	0.0319605	7.77742	0.0052903	2.27652
rs4623533	16779962	T	C	0.695246	0.678625	0.93297	40424	0	-0.0753	0.0194	15.1	0.000104	3.98297	16.78	-0.054324	0.0194695	7.76725	0.0053202	2.27407
rs12377884	16939718	G	T	0.102967	0.0847078	0.997504	40424	1	-0.187	0.0308	36.9	1.27e-09	8.8962	16.9397	-0.0882068	0.0318254	7.7544	0.0053582	2.27098
rs142815175	16961282	C	CCCT	0.101237	0.0834513	0.966251	40424	0	-0.178913	0.0312367	33.5636	6.9e-09	8.16133	16.9613	-0.0895533	0.0323198	7.75217	0.0053648	2.27045
rs55813831	16958580	T	A	0.101418	0.0834904	0.983784	40424	0	-0.186	0.0308	36.5	1.55e-09	8.80967	16.9586	-0.0891228	0.032183	7.74268	0.0053931	2.26816
rs55995817	16958583	C	T	0.101418	0.0834906	0.983785	40424	0	-0.186	0.0308	36.5	1.55e-09	8.80967	16.9586	-0.0891198	0.0321829	7.74219	0.0053945	2.26805
rs10756815	16789081	G	A	0.843195	0.835422	0.902255	40424	0	-0.0754	0.0247	9.34	0.00225	2.64782	16.7891	-0.0700279	0.0251066	7.73603	0.005413	2.26656
rs10962769	16959695	C	G	0.102458	0.084523	0.996426	40424	1	-0.185	0.0308	36.2	1.75e-09	8.75696	16.9597	-0.0879525	0.0318447	7.70058	0.0055203	2.25804
rs10962647	16868380	T	G	0.160211	0.132828	0.995862	40424	1	-0.227	0.025	83	8.21e-20	19.0857	16.8684	-0.0833315	0.030131	7.6729	0.0056056	2.25138
rs79901991	16881595	T	C	0.0176358	0.0132518	0.58927	40424	0	-0.408	0.0936	19	1.29e-05	4.88941	16.8816	-0.274256	0.100775	7.66704	0.0056239	2.24996
rs10962793	16982735	G	A	0.100979	0.0829858	0.996678	40424	1	-0.185	0.031	35.5	2.5e-09	8.60206	16.9827	-0.0881205	0.0320191	7.6472	0.0056861	2.24519
rs147833018	17340476	G	A	0.0121024	0.0125435	0.41641	40424	0	0.0217	0.108	0.0401	0.841	0.075204	17.3405	0.345212	0.12309	7.62479	0.0057571	2.23979
rs12379687	16854367	G	T	0.159438	0.132221	0.999783	40424	1	-0.228	0.0251	82.5	1.06e-19	18.9747	16.8544	-0.0832179	0.0302208	7.60556	0.0058189	2.23516
rs2253579	16797360	T	C	0.912521	0.907954	0.832473	40424	0	-0.0641	0.0322	3.96	0.0465	1.33255	16.7974	-0.0928276	0.0335199	7.60325	0.0058263	2.23461
rs200778526	16954487	C	CTG	0.102927	0.0884313	0.784252	40424	0	-0.186923	0.0343145	30.3042	3.69e-08	7.43259	16.9545	-0.0968388	0.0352906	7.60154	0.0058318	2.23419
rs76809723	16971912	C	G	0.100131	0.0820501	0.983018	40424	0	-0.186	0.031	36.1	1.86e-09	8.73049	16.9719	-0.0888365	0.0323892	7.59602	0.0058497	2.23286
rs10962791	16981899	A	G	0.100794	0.0827999	0.990985	40424	0	-0.186	0.031	36.1	1.92e-09	8.7167	16.9819	-0.0880423	0.0321107	7.58997	0.0058694	2.23141
rs11793537	16778859	G	C	0.689163	0.672624	0.950017	40424	0	-0.0691	0.019	13.2	0.000284	3.54668	16.7789	-0.0528794	0.0192062	7.56364	0.0059558	2.22506
rs147405326	16972005	TC	T	0.100197	0.0821354	0.98307	40424	0	-0.178162	0.0312831	33.1863	8.37e-09	8.07708	16.972	-0.0884474	0.0323689	7.5387	0.0060388	2.21905
rs62541877	16852453	G	A	0.159178	0.132268	0.978882	40424	0	-0.232	0.0251	85	2.97e-20	19.5272	16.8525	-0.0835711	0.0305175	7.52176	0.0060958	2.21497
rs75432724	16447455	C	T	0.0239813	0.0202431	0.541043	40424	0	-0.242	0.069	12.3	0.000452	3.34486	16.4474	-0.228682	0.0845872	7.51843	0.0061071	2.21417
rs143521017	16967953	CTG	C	0.101097	0.0830156	0.972563	40424	0	-0.1781	0.0313186	33.0853	8.82e-09	8.05452	16.9679	-0.0882323	0.0324059	7.48457	0.006223	2.206
rs10962721	16931757	T	C	0.107851	0.0902068	0.983034	40424	0	-0.174	0.03	33.7	6.48e-09	8.18843	16.9318	-0.0843499	0.0309727	7.4833	0.0062274	2.20569
rs138117140	16978907	G	A	0.100681	0.0827088	0.991185	40424	0	-0.185	0.031	35.6	2.41e-09	8.61798	16.9789	-0.0874033	0.0321078	7.48113	0.0062349	2.20517
rs10511630	16962019	G	C	0.897061	0.914696	0.956625	40424	0	0.187	0.0307	37.2	1.07e-09	8.97062	16.962	0.0876557	0.0322042	7.47872	0.0062432	2.20459
rs141451708	16978723	G	A	0.100677	0.0827042	0.990849	40424	0	-0.185	0.031	35.6	2.42e-09	8.61618	16.9787	-0.0873794	0.0321098	7.47611	0.0062523	2.20396
rs10962770	16959711	C	T	0.0995632	0.0820913	0.968729	40424	0	-0.186	0.0309	36.3	1.68e-09	8.77469	16.9597	-0.0889434	0.0326841	7.47609	0.0062524	2.20396
rs202085119	16476556	TTG	T	0.0343425	0.037212	0.516897	40424	0	0.19843	0.0648454	9.22835	0.002383	2.62288	16.4766	0.178818	0.0649851	7.47332	0.006262	2.20329
rs147831210	16977903	C	T	0.100662	0.0826853	0.989775	40424	0	-0.185	0.031	35.6	2.47e-09	8.6073	16.9779	-0.0872529	0.0321177	7.45069	0.0063412	2.19783
rs200458495	16905624	TA	T	0.119938	0.130252	0.875182	40424	0	0.0481429	0.027762	2.99467	0.0835389	1.07811	16.9056	0.076387	0.0279236	7.4354	0.0063953	2.19414
rs4246148	16781531	G	C	0.841215	0.833266	0.902656	40424	0	-0.0879	0.0243	13.1	0.000298	3.52578	16.7815	-0.068236	0.0249766	7.42438	0.0064346	2.19148
rs10962779	16974010	A	T	0.101049	0.0829821	0.998418	40424	1	-0.185	0.031	35.6	2.39e-09	8.6216	16.974	-0.086687	0.0319997	7.40823	0.0064926	2.18758
rs10962792	16982414	T	A	0.100887	0.0829628	0.987738	40424	0	-0.185	0.031	35.8	2.18e-09	8.66154	16.9824	-0.08696	0.0321228	7.398	0.0065296	2.18511
rs4961510	16962418	C	T	0.897016	0.914581	0.956824	40424	0	0.186	0.0307	36.6	1.43e-09	8.84466	16.9624	0.0871526	0.0321982	7.39548	0.0065388	2.1845
rs5896721	16905620	AT	A	0.120044	0.13036	0.875674	40424	0	0.0479078	0.027743	2.96962	0.0848418	1.07139	16.9056	0.0761156	0.0279044	7.39302	0.0065477	2.18391
rs10962778	16973617	C	T	0.100201	0.0822005	0.988207	40424	0	-0.185	0.031	35.6	2.38e-09	8.62342	16.9736	-0.0873131	0.0322847	7.38406	0.0065804	2.18174
rs11790607	16558576	T	C	0.0247584	0.0213405	0.483386	40424	0	-0.23	0.0709	10.5	0.00117	2.93181	16.5586	-0.23609	0.0884879	7.33478	0.0067633	2.16984
rs80263524	16586953	T	C	0.0244969	0.0211248	0.472485	40424	0	-0.215	0.0703	9.37	0.00221	2.65561	16.587	-0.240041	0.089996	7.3312	0.0067768	2.16898
rs10962780	16975096	T	C	0.100202	0.08224	0.988621	40424	0	-0.185	0.031	35.6	2.4e-09	8.61979	16.9751	-0.0867375	0.0322582	7.29853	0.0069011	2.16108
c9_pos16855291	16865291	G	A	0.159315	0.132199	0.998742	40424	1	-0.228	0.0251	82.3	1.17e-19	18.9318	16.8653	-0.0815741	0.0302919	7.27301	0.0069998	2.15491
rs75885837	16974257	T	C	0.100288	0.0823264	0.989159	40424	0	-0.184	0.0309	35.3	2.81e-09	8.55129	16.9743	-0.086478	0.0322382	7.26367	0.0070363	2.15265
rs11792249	16864076	A	G	0.159387	0.132324	0.998703	40424	1	-0.227	0.0251	82.2	1.25e-19	18.9031	16.8641	-0.0814826	0.030291	7.25705	0.0070623	2.15105
rs11789463	16836011	G	A	0.50879	0.490461	0.6472	40424	0	-0.101	0.0205	24.1	9.16e-07	6.0381	16.836	-0.0596511	0.0221653	7.24388	0.0071143	2.14787
rs117456743	16481554	G	A	0.0224393	0.0189872	0.573703	40424	0	-0.256	0.0709	13	0.000312	3.50584	16.4815	-0.225434	0.0850024	7.24122	0.0071249	2.14722
rs140238929	17359413	A	G	0.0131139	0.0135683	0.429971	40424	0	0.0369	0.105	0.123	0.725	0.139662	17.3594	0.318132	0.116575	7.23658	0.0071433	2.1461
rs10962725	16933037	G	A	0.107475	0.0900805	0.999967	40424	1	-0.172	0.0299	33.2	8.16e-09	8.08831	16.933	-0.0825923	0.0308499	7.2307	0.0071667	2.14468
rs62541879	16861508	A	G	0.1582	0.13129	0.986247	40424	0	-0.226	0.0251	81.1	2.16e-19	18.6655	16.8615	-0.0817724	0.0305652	7.17825	0.0073793	2.13199
rs62541878	16861205	A	T	0.158204	0.131309	0.985491	40424	0	-0.226	0.0251	81	2.21e-19	18.6556	16.8612	-0.0815806	0.0305715	7.14161	0.0075316	2.12312
rs17743666	16814564	A	G	0.031011	0.0342885	0.521715	40424	0	0.137	0.0581	5.59	0.0181	1.74232	16.8146	0.182209	0.0675705	7.13818	0.007546	2.12229
rs10962645	16863543	A	C	0.159901	0.133168	0.980475	40424	0	-0.227	0.0251	82.1	1.29e-19	18.8894	16.8635	-0.0811972	0.0304371	7.13703	0.0075508	2.12201
rs35340571	16886714	AT	A	0.753897	0.754841	0.974354	40424	0	0.0489102	0.0203208	5.81462	0.0158935	1.79878	16.8867	-0.0589117	0.0221782	7.03751	0.007982	2.09789
rs56343038	16776792	T	G	0.688004	0.671819	0.966124	40424	0	-0.0656	0.019	12	0.000545	3.2636	16.7768	-0.0504702	0.0190452	7.00769	0.008116	2.09066
rs10962648	16868958	G	C	0.159404	0.132448	0.996003	40424	1	-0.227	0.0251	81.5	1.76e-19	18.7545	16.869	-0.07993	0.0303349	6.96222	0.0083249	2.07962
rs11788047	16858569	G	A	0.157994	0.131264	0.983667	40424	0	-0.224	0.025	80	3.81e-19	18.4191	16.8586	-0.0799401	0.0306197	6.83534	0.0089372	2.0488
rs10962572	16762034	A	G	0.679931	0.66338	0.926782	40424	0	-0.0705	0.0193	13.4	0.000253	3.59688	16.762	-0.0505324	0.0193097	6.83464	0.0089407	2.04863
rs1330299	16760796	C	T	0.686008	0.670926	0.890874	40424	0	-0.0749	0.0196	14.6	0.000134	3.8729	16.7608	-0.0518449	0.0198245	6.82541	0.008987	2.04639
rs10962533	16675103	C	T	0.0183889	0.0204505	0.448344	40424	0	0.146	0.0732	3.99	0.0456	1.34103	16.6751	0.242067	0.0925422	6.71705	0.0095495	2.02002
rs10738472	17185100	C	T	0.993224	0.992794	0.366091	40424	0	-0.0564	0.113	0.251	0.617	0.209715	17.1851	-0.455291	0.172748	6.7134	0.0095691	2.01913
rs10962573	16762039	C	T	0.680935	0.66453	0.922649	40424	0	-0.0723	0.0193	14	0.000186	3.73049	16.762	-0.0502089	0.0193766	6.70102	0.0096358	2.01611
rs35336333	16865786	G	A	0.0691819	0.0654953	0.956568	40424	0	-0.0726	0.0355	4.19	0.0407	1.39041	16.8658	0.100123	0.0385392	6.69291	0.0096797	2.01414
rs10962585	16776985	A	T	0.670858	0.655775	0.907135	40424	0	-0.0739	0.0191	14.9	0.000112	3.95078	16.777	-0.0501573	0.0193914	6.67723	0.0097652	2.01032
rs12343424	16770229	T	C	0.686299	0.670375	0.964266	40424	0	-0.0626	0.0189	11	0.000912	3.04	16.7702	-0.0491865	0.0190417	6.65852	0.0098683	2.00576
rs12353453	16769943	A	G	0.686298	0.670375	0.963666	40424	0	-0.0627	0.0189	11	0.000901	3.04528	16.7699	-0.0491789	0.0190461	6.6534	0.0098967	2.00451
rs10810619	16763140	A	G	0.679315	0.662784	0.928716	40424	0	-0.0688	0.0192	12.8	0.000344	3.46344	16.7631	-0.0497367	0.0193053	6.62428	0.0100598	1.99741
rs7031229	16761255	C	A	0.833133	0.825686	0.838406	40424	0	-0.0736	0.0243	9.13	0.00251	2.60033	16.7613	-0.0652033	0.0253405	6.58858	0.0102635	1.9887
rs7868594	16906384	G	C	0.86342	0.852002	0.988895	40424	1	-0.0427	0.0248	2.98	0.0845	1.07314	16.9064	-0.0640437	0.0249113	6.57215	0.0103587	1.9847
rs2026805	16800789	G	A	0.74843	0.733177	0.969376	40424	0	-0.0594	0.0201	8.71	0.00316	2.50031	16.8008	-0.0522463	0.0203521	6.57111	0.0103647	1.98444
rs10810616	16761597	T	C	0.678696	0.66235	0.928358	40424	0	-0.0706	0.0193	13.4	0.000247	3.6073	16.7616	-0.0493751	0.019275	6.54903	0.0104941	1.97905
rs10756826	16889171	C	G	0.739916	0.742079	0.928785	40424	0	0.0429	0.0203	4.46	0.0347	1.45967	16.8892	-0.0575144	0.0224519	6.54639	0.0105097	1.97841
rs79782631	16921752	A	G	0.0158792	0.0112651	0.730923	40424	0	-0.262	0.0766	11.7	0.000638	3.19518	16.9217	-0.24016	0.0955165	6.53426	0.0105816	1.97545
rs144013719	16479006	T	C	0.0469897	0.050146	0.902627	40424	0	0.101	0.0415	5.93	0.0149	1.82681	16.479	0.109847	0.0428879	6.48549	0.0108759	1.96354
rs10756822	16876337	G	C	0.750313	0.751438	0.973858	40424	0	0.0483	0.0202	5.72	0.0168	1.77469	16.8763	-0.0556927	0.0218832	6.46168	0.0110225	1.95772
rs10756813	16788308	C	T	0.673663	0.659055	0.704082	40424	0	-0.0946	0.0219	18.7	1.52e-05	4.81816	16.7883	-0.0565502	0.0222543	6.44514	0.0111256	1.95368
rs76814594	16416973	G	A	0.0242717	0.020563	0.565527	40424	0	-0.226	0.0672	11.3	0.000765	3.11634	16.417	-0.204918	0.0819897	6.40502	0.0113798	1.94386
rs10756811	16768265	G	C	0.694754	0.680135	0.911035	40424	0	-0.0669	0.0193	12	0.000542	3.266	16.7683	-0.0498005	0.0197836	6.32369	0.0119135	1.92396
rs10962582	16772775	A	C	0.689458	0.673928	0.999591	40424	1	-0.061	0.0187	10.6	0.00114	2.9431	16.7728	-0.0473555	0.0188372	6.30667	0.0120285	1.91979
rs146686342	16788452	A	G	0.0136203	0.0126465	0.155111	40424	0	-0.113	0.108	1.1	0.295	0.530178	16.7885	-0.495754	0.200666	6.27621	0.012237	1.91233
rs117522411	16730041	C	T	0.0253628	0.0226629	0.242708	40424	0	-0.225	0.0902	6.24	0.0125	1.90309	16.73	-0.294304	0.118759	6.26625	0.0123059	1.90989
rs13296795	16886538	G	A	0.0371088	0.035475	0.908893	40424	0	-0.0316	0.0467	0.457	0.499	0.301899	16.8865	0.129843	0.0515349	6.26553	0.0123109	1.90971
rs1339549	16864572	T	A	0.0676834	0.0639566	0.996466	40424	1	-0.0754	0.0355	4.51	0.0336	1.47366	16.8646	0.0960802	0.0383181	6.23647	0.0125146	1.90258
rs12344347	16769662	C	T	0.683051	0.66734	0.956359	40424	0	-0.0611	0.0189	10.5	0.00122	2.91364	16.7697	-0.047554	0.0190531	6.21712	0.0126521	1.89784
rs11793056	16765339	A	G	0.682321	0.666368	0.940784	40424	0	-0.0659	0.0192	11.8	0.000589	3.22988	16.7653	-0.0479327	0.0192137	6.21147	0.0126925	1.89645
rs10738457	16746159	G	A	0.0635878	0.0670756	0.730068	40424	0	0.0719	0.0378	3.62	0.057	1.24412	16.7462	0.103421	0.0413157	6.20335	0.0127509	1.89446
rs78803850	16499866	C	A	0.0172179	0.0142759	0.494364	40424	0	-0.24	0.0781	9.47	0.00209	2.67985	16.4999	-0.259216	0.105968	6.17619	0.0129481	1.88779
rs41349645	16882186	C	T	0.753039	0.754584	0.995724	40424	1	0.05	0.0202	6.13	0.0133	1.87615	16.8822	-0.0546524	0.0220086	6.15178	0.013128	1.8818
rs7019267	16869168	T	C	0.0667617	0.0627089	0.986748	40424	1	-0.078	0.0359	4.73	0.0297	1.52724	16.8692	0.0963924	0.0387643	6.13272	0.0132703	1.87712
rs199542150	16862359	C	CT	0.0643764	0.0605783	0.964945	40424	0	-0.0805418	0.0368505	4.82403	0.0280657	1.55183	16.8624	0.0988408	0.0398008	6.11578	0.013398	1.87296
rs12341168	16793202	T	C	0.0785	0.0823914	0.803957	40424	0	0.0653	0.0336	3.78	0.052	1.284	16.7932	0.0889251	0.0358454	6.1028	0.0134968	1.86977
rs10810599	16733870	G	T	0.064302	0.0677816	0.727577	40424	0	0.0565	0.0379	2.22	0.136	0.866461	16.7339	0.102164	0.0412033	6.08715	0.0136169	1.86592
rs2282072	16727446	T	A	0.0640345	0.0674832	0.731363	40424	0	0.058	0.0378	2.35	0.125	0.90309	16.7275	0.101856	0.0411775	6.05809	0.0138427	1.85878
rs10125996	16792675	G	C	0.0779764	0.081586	0.80358	40424	0	0.0707	0.034	4.33	0.0374	1.42713	16.7927	0.0888665	0.0359839	6.0478	0.0139236	1.85625
rs10962601	16796252	T	G	0.0778055	0.081399	0.813045	40424	0	0.0618	0.0339	3.32	0.0685	1.16431	16.7963	0.0883721	0.0357983	6.04329	0.0139592	1.85514
rs192777993	16978226	A	G	0.0878227	0.0728555	0.940571	40424	0	-0.188	0.0322	34.3	4.64e-09	8.33348	16.9782	-0.0849126	0.0347415	6.03001	0.0140647	1.85187
rs10120562	16793104	A	G	0.0784444	0.0820723	0.806152	40424	0	0.0646	0.0337	3.68	0.0549	1.26043	16.7931	0.0884011	0.0358519	6.02896	0.014073	1.85161
rs10810602	16739423	G	A	0.0634886	0.0669568	0.731893	40424	0	0.0677	0.0367	3.4	0.0653	1.18509	16.7394	0.101905	0.0413043	6.02692	0.0140893	1.85111
rs10119731	16792350	A	C	0.0801092	0.0839299	0.80152	40424	0	0.0658	0.0336	3.83	0.0504	1.29757	16.7923	0.08764	0.035602	6.00966	0.0142278	1.84686
rs12380481	16791865	C	T	0.0786842	0.0823622	0.804832	40424	0	0.0707	0.0338	4.37	0.0365	1.43771	16.7919	0.0879407	0.0357841	5.98918	0.0143939	1.84182
rs201200261	16886718	TG	T	0.699248	0.699532	0.808238	40424	0	0.0403356	0.0210527	3.6798	0.0550755	1.25904	16.8867	-0.0550899	0.022538	5.96397	0.0146011	1.83561
rs146011856	16964416	G	C	0.0163134	0.0168909	0.6939	40424	0	0.0186	0.0778	0.057	0.811	0.0909792	16.9644	0.205533	0.0833458	5.94939	0.0147224	1.83202
rs62543887	16785289	A	G	0.0119381	0.0089549	0.359813	40424	0	-0.333	0.105	10.1	0.00148	2.82974	16.7853	-0.380785	0.159587	5.93329	0.0148575	1.82805
rs10962605	16799623	A	G	0.751317	0.736883	0.982435	40424	0	-0.0559	0.0202	7.64	0.0057	2.24412	16.7996	-0.0495036	0.0203182	5.91928	0.0149761	1.8246
rs12682783	16863040	G	A	0.0656049	0.0615129	0.98253	40424	0	-0.0764	0.0359	4.54	0.0331	1.48017	16.863	0.0953934	0.0391302	5.89462	0.0151872	1.81852
rs5016914	16751872	C	T	0.0642666	0.0676973	0.727082	40424	0	0.0791	0.0389	4.13	0.0421	1.37572	16.7519	0.10057	0.0412296	5.89221	0.015208	1.81793
rs10115109	16790074	T	G	0.078535	0.0823515	0.795059	40424	0	0.0652	0.0339	3.71	0.0542	1.266	16.7901	0.0876625	0.035989	5.88399	0.0152792	1.8159
rs13300099	16862358	A	C	0.0657609	0.0616705	0.979962	40424	0	-0.0691	0.0356	3.76	0.0524	1.28067	16.8624	0.0953073	0.0391697	5.87221	0.0153817	1.81299
rs12683636	16862691	T	C	0.0664302	0.0623799	0.999823	40424	1	-0.0753	0.0358	4.41	0.0357	1.44733	16.8627	0.0938856	0.038588	5.87172	0.015386	1.81287
rs66503309	16797148	A	AT	0.752251	0.737798	0.985124	40424	0	-0.0553735	0.0202785	7.43267	0.006405	2.19348	16.7971	-0.0493061	0.0203262	5.86757	0.0154223	1.81185
rs10962642	16857292	G	T	0.160744	0.134247	0.975883	40424	0	-0.218	0.0249	77	1.71e-18	17.767	16.8573	-0.073666	0.0305057	5.8464	0.015609	1.80663
rs2183407	16790968	G	C	0.0785242	0.0823184	0.79603	40424	0	0.0702	0.0339	4.29	0.0384	1.41567	16.791	0.0872468	0.0359716	5.83419	0.0157176	1.80361
rs2183406	16790960	A	G	0.0787017	0.0824985	0.796248	40424	0	0.0697	0.0339	4.23	0.0396	1.4023	16.791	0.0870677	0.0359327	5.82292	0.0158187	1.80083
rs10810636	16799109	A	G	0.752273	0.737857	0.979418	40424	0	-0.0556	0.0202	7.55	0.00599	2.22257	16.7991	-0.0492081	0.0203727	5.81767	0.0158659	1.79953
rs12378598	16788363	A	G	0.0755155	0.0791562	0.757386	40424	0	0.0615	0.0347	3.14	0.0765	1.11634	16.7884	0.0908521	0.0375163	5.81444	0.0158951	1.79874
rs72714999	16415775	C	T	0.119202	0.122239	0.537103	40424	0	0.0613	0.0304	4.06	0.0438	1.35853	16.4158	0.0870198	0.0360306	5.79511	0.0160708	1.79396
rs12338608	16800470	C	T	0.0754219	0.0786047	0.790687	40424	0	0.0637	0.0341	3.49	0.0619	1.20831	16.8005	0.0889609	0.0368784	5.77046	0.0162978	1.78787
rs10962600	16795783	C	T	0.752146	0.737953	0.996613	40424	1	-0.0553	0.0201	7.53	0.00607	2.21681	16.7958	-0.0485254	0.0202378	5.73299	0.0166491	1.77861
rs10962597	16794348	A	C	0.752356	0.73822	0.984148	40424	0	-0.056	0.0202	7.67	0.00561	2.25104	16.7944	-0.0487296	0.0203417	5.72242	0.0167496	1.77599
rs10962570	16759357	G	A	0.675798	0.660438	0.911812	40424	0	-0.0683	0.0193	12.5	0.000413	3.38405	16.7594	-0.0462361	0.0193333	5.70916	0.0168766	1.77272
rs10962596	16792200	C	G	0.751781	0.737643	0.970835	40424	0	-0.0564	0.0203	7.7	0.00552	2.25806	16.7922	-0.0488858	0.0204337	5.70736	0.0168939	1.77227
rs13294647	16759161	C	T	0.675764	0.660421	0.911074	40424	0	-0.0682	0.0193	12.5	0.000416	3.38091	16.7592	-0.0461865	0.0193392	5.69346	0.0170282	1.76883
rs10810610	16756256	G	C	0.0714793	0.0758196	0.686609	40424	0	0.0566	0.0368	2.36	0.124	0.906578	16.7563	0.0964686	0.0402542	5.69196	0.0170428	1.76846
rs10810658	16886600	G	A	0.729426	0.731937	0.891439	40424	0	0.0381	0.0204	3.48	0.0622	1.20621	16.8866	-0.0540748	0.0226481	5.6879	0.0170823	1.76745
rs141457510	16489760	C	T	0.0187368	0.0169898	0.543745	40424	0	-0.0675	0.074	0.831	0.362	0.441292	16.4898	-0.214457	0.0910534	5.68413	0.017119	1.76652
rs117445766	16457227	T	C	0.0167374	0.0140214	0.523287	40424	0	-0.266	0.0825	10.4	0.00124	2.90658	16.4572	-0.243143	0.103644	5.66868	0.0172704	1.7627
rs7872189	16940437	G	A	0.130889	0.115749	0.920229	40424	0	-0.142	0.0273	26.9	2.12e-07	6.67366	16.9404	-0.0687554	0.0290241	5.64792	0.0174761	1.75756
rs10962599	16795286	C	T	0.749977	0.735877	0.985711	40424	0	-0.0564	0.0202	7.84	0.00511	2.29158	16.7953	-0.0482353	0.0202798	5.64143	0.0175409	1.75595
rs34108610	16801401	A	AT	0.152385	0.158517	0.846258	40424	0	0.0723246	0.0262248	7.5623	0.0059602	2.22474	16.8014	0.0625753	0.0262914	5.6368	0.0175873	1.7548
rs2026804	16800341	A	C	0.751044	0.73669	0.981912	40424	0	-0.0549	0.0202	7.36	0.00666	2.17653	16.8003	-0.0482143	0.020326	5.61111	0.017847	1.74844
rs10119811	16799844	C	T	0.0748862	0.0781401	0.782816	40424	0	0.054	0.0344	2.47	0.116	0.935542	16.7998	0.0882856	0.0371755	5.59339	0.0180284	1.74404
rs944207	16758710	G	A	0.675549	0.660331	0.906151	40424	0	-0.0666	0.0194	11.8	0.000586	3.2321	16.7587	-0.0458538	0.0193796	5.58848	0.018079	1.74283
rs34536017	16861502	TG	T	0.0638926	0.0597422	0.955202	40424	0	-0.0865671	0.037265	5.45364	0.0195276	1.70935	16.8615	0.0947695	0.0402745	5.49282	0.0190947	1.71909
rs10810617	16761621	G	A	0.0704548	0.0738652	0.731326	40424	0	0.0704	0.0359	3.86	0.0496	1.30452	16.7616	0.0926926	0.0394757	5.465	0.0194011	1.71218
rs7861591	16804447	C	T	0.0784394	0.0821495	0.764304	40424	0	0.0507	0.0363	1.95	0.162	0.790485	16.8044	0.0860793	0.0367725	5.43615	0.0197241	1.705
rs35255043	16643767	CA	C	0.0262668	0.0230381	0.455386	40424	0	-0.263682	0.0878601	9.29861	0.0022933	2.63954	16.6438	-0.202791	0.088135	5.42445	0.0198567	1.70209
rs34007653	16643772	A	G	0.0262667	0.0230382	0.455385	40424	0	-0.203	0.0694	8.54	0.00347	2.45967	16.6438	-0.202778	0.0881349	5.42377	0.0198644	1.70192
rs12685962	16849517	C	G	0.0714037	0.0680571	0.971496	40424	0	-0.0698	0.0345	4.1	0.043	1.36653	16.8495	0.0869256	0.037205	5.41809	0.0199292	1.70051
rs4961496	16789652	C	T	0.89801	0.891849	0.747593	40424	0	-0.0864	0.031	7.79	0.00526	2.27901	16.7897	-0.0770199	0.0331047	5.37783	0.0203942	1.69049
rs10481508	16849720	C	T	0.928203	0.931542	0.987886	40424	1	0.069	0.0345	4.01	0.0453	1.3439	16.8497	-0.085739	0.0369313	5.35001	0.0207222	1.68356
rs10120138	16780518	C	T	0.078338	0.0822768	0.775959	40424	0	0.071	0.0339	4.38	0.0364	1.4389	16.7805	0.0845342	0.0364257	5.3423	0.020814	1.68165
rs12341542	16788253	T	C	0.0847663	0.0886798	0.68384	40424	0	0.0673	0.0348	3.73	0.0534	1.27246	16.7883	0.0871079	0.0375594	5.33578	0.020892	1.68002
rs200119742	16801742	AC	A	0.0891629	0.093657	0.697645	40424	0	0.0802731	0.0361998	4.88228	0.0271338	1.56649	16.8017	0.0840645	0.0363012	5.32292	0.0210467	1.67682
rs10810611	16756377	G	A	0.632659	0.618386	0.806954	40424	0	-0.0588	0.0194	9.16	0.00248	2.60555	16.7564	-0.0461652	0.0200798	5.27905	0.0215835	1.66588
rs4433240	16801130	G	C	0.751231	0.737048	0.967021	40424	0	-0.0551	0.0203	7.37	0.00665	2.17718	16.8011	-0.0470728	0.0204619	5.27818	0.0215943	1.66566
rs12345910	16802118	T	C	0.751724	0.737605	0.963264	40424	0	-0.0552	0.0204	7.37	0.00664	2.17783	16.8021	-0.0471701	0.0205117	5.27429	0.0216426	1.66469
rs79982383	16743232	G	GT	0.0673119	0.0706869	0.721337	40424	0	0.0949283	0.0404557	5.45491	0.0195134	1.70967	16.7432	0.0935694	0.0405702	5.27091	0.0216847	1.66385
rs1952688	16782156	A	G	0.0794855	0.0836577	0.780265	40424	0	0.0518	0.0335	2.38	0.123	0.910095	16.7822	0.0825683	0.0360433	5.20654	0.0225021	1.64778
rs7862734	16762161	A	G	0.073429	0.0769306	0.7313	40424	0	0.063	0.0353	3.18	0.0746	1.12726	16.7622	0.088755	0.0387461	5.20311	0.0225465	1.64692
rs36084473	16847601	T	C	0.0706481	0.0672821	0.965669	40424	0	-0.0703	0.0347	4.11	0.0427	1.36957	16.8476	0.0857341	0.0374746	5.19544	0.0226462	1.645
rs12344698	16750143	C	T	0.0696754	0.0732455	0.730439	40424	0	0.0534	0.0364	2.16	0.142	0.847712	16.7501	0.0907348	0.0396542	5.18941	0.0227249	1.6435
rs10733321	16784682	C	G	0.221059	0.234384	0.882589	40424	0	0.0435	0.0219	3.96	0.0466	1.33161	16.7847	0.0505695	0.0221766	5.18294	0.0228097	1.64188
rs13290007	16751586	C	T	0.691789	0.676572	0.867261	40424	0	-0.0607	0.0198	9.41	0.00216	2.66555	16.7516	-0.04559	0.0200209	5.17543	0.0229085	1.64
rs12238070	16754595	G	A	0.0670721	0.0703578	0.722525	40424	0	0.0576	0.0371	2.41	0.121	0.917215	16.7546	0.0926877	0.0405988	5.16522	0.0230435	1.63745
rs12377846	16786784	A	C	0.0353614	0.0376779	0.561605	40424	0	0.073	0.0604	1.46	0.227	0.643974	16.7868	0.141345	0.0618409	5.16059	0.023105	1.63629
rs202193211	16767544	G	GTA	0.842508	0.83629	0.792946	40424	0	-0.0801375	0.0267189	8.94069	0.0027889	2.55457	16.7675	-0.0610158	0.0268187	5.15212	0.023218	1.63417
rs10116407	16726654	T	C	0.0755625	0.079937	0.678448	40424	0	0.0514	0.0361	2.03	0.154	0.812479	16.7266	0.0899862	0.0395251	5.13998	0.0233809	1.63114
rs35272268	16807007	C	CT	0.747651	0.733233	0.918242	40424	0	-0.0545237	0.0207606	6.87684	0.008732	2.05889	16.807	-0.0470595	0.0208163	5.09754	0.0239598	1.62052
chr916767549	16767549	C	CAA	0.841385	0.83502	0.788034	40424	0	-0.0796437	0.0267172	8.83246	0.0029592	2.52883	16.7675	-0.0606442	0.0268155	5.09099	0.0240505	1.61888
rs17743789	16817233	A	G	0.014817	0.0173133	0.518099	40424	0	0.214	0.082	6.83	0.00896	2.04769	16.8172	0.215459	0.0946976	5.08601	0.0241196	1.61763
rs13299347	16756914	G	A	0.662766	0.647841	0.871106	40424	0	-0.0623	0.0196	10.1	0.00148	2.82974	16.7569	-0.0441757	0.0195767	5.08407	0.0241466	1.61714
rs73419969	16736665	G	A	0.067017	0.0703081	0.723892	40424	0	0.0583	0.0372	2.47	0.116	0.935542	16.7367	0.0918251	0.0405855	5.07314	0.0242993	1.61441
rs1337386	16733410	T	C	0.0677011	0.0709997	0.721573	40424	0	0.0529	0.0372	2.02	0.156	0.806875	16.7334	0.0915133	0.0404831	5.06433	0.0244231	1.6122
rs10962612	16804167	T	G	0.750121	0.73574	0.947456	40424	0	-0.0529	0.0204	6.75	0.00938	2.0278	16.8042	-0.0464007	0.0205956	5.06256	0.0244481	1.61176
rs11790448	16938501	G	A	0.859272	0.874705	0.774499	40424	0	0.0524	0.0252	4.32	0.0377	1.42366	16.9385	0.0684451	0.0305275	5.05927	0.0244946	1.61093
rs28626673	16763554	C	T	0.067993	0.0710567	0.767661	40424	0	0.0707	0.0359	3.89	0.0485	1.31426	16.7635	0.0884949	0.0392089	5.05049	0.024619	1.60873
rs12685078	16846636	G	T	0.0703172	0.0668119	0.98448	40424	1	-0.0681	0.0349	3.81	0.051	1.29243	16.8466	0.0840919	0.0373368	5.03555	0.0248322	1.60499
rs116498623	16917013	G	A	0.0253067	0.0243217	0.826117	40424	0	-0.0438	0.0587	0.556	0.456	0.341035	16.917	0.144442	0.0638689	5.03346	0.0248622	1.60446
rs34411139	16752614	AT	A	0.690989	0.675898	0.868124	40424	0	-0.0590792	0.0199232	8.77227	0.0030584	2.5145	16.7526	-0.0448532	0.0199992	5.02057	0.0250479	1.60123
rs117961000	17215523	A	T	0.0103762	0.0125628	0.703309	40424	0	0.138	0.0984	1.95	0.162	0.790485	17.2155	0.216743	0.0957978	5.01243	0.025166	1.59919
chr916758189	16758189	A	ATT	0.0672541	0.0703525	0.722048	40424	0	0.0915129	0.0404861	5.06373	0.0244316	1.61205	16.7582	0.0907596	0.0406066	4.95182	0.0260632	1.58397
rs9987471	16749871	T	C	0.692193	0.677243	0.874871	40424	0	-0.0572	0.0198	8.38	0.00378	2.42251	16.7499	-0.044305	0.0199195	4.93795	0.0262732	1.58049
rs11787694	16748778	T	C	0.692193	0.677243	0.874867	40424	0	-0.0612	0.0201	9.31	0.00228	2.64207	16.7488	-0.0443003	0.0199195	4.9369	0.0262891	1.58022
rs10962576	16770634	C	T	0.069813	0.0731874	0.784159	40424	0	0.0661	0.0355	3.46	0.063	1.20066	16.7706	0.0853436	0.0382709	4.93157	0.0263703	1.57888
rs7024720	16775905	T	G	0.0701772	0.0735379	0.780259	40424	0	0.0733	0.0353	4.3	0.038	1.42022	16.7759	0.0851248	0.038213	4.92113	0.0265302	1.57626
rs7855044	16758505	T	C	0.0682375	0.0714243	0.713835	40424	0	0.0564	0.0368	2.35	0.125	0.90309	16.7585	0.0903019	0.0405443	4.91753	0.0265855	1.57536
rs10117034	16766031	C	T	0.0689552	0.0720457	0.761456	40424	0	0.0666	0.0369	3.25	0.0714	1.1463	16.766	0.086974	0.0391345	4.89769	0.0268926	1.57037
rs10810606	16754982	T	A	0.683268	0.668056	0.863046	40424	0	-0.0622	0.0197	9.92	0.00163	2.78781	16.755	-0.0440795	0.0199518	4.87238	0.0272898	1.564
rs10810586	16673676	A	C	0.120965	0.12942	0.526313	40424	0	0.104	0.0323	10.3	0.0013	2.88606	16.6737	0.0801164	0.0362836	4.84807	0.0276771	1.55788
rs76914288	16654036	C	A	0.0193322	0.0210673	0.52611	40424	0	0.138	0.0713	3.75	0.0529	1.27654	16.654	0.188645	0.0850532	4.8331	0.0279184	1.55411
rs199802355	16775399	A	AAG	0.0306485	0.0327518	0.582347	40424	0	0.176534	0.0646813	7.33005	0.0067811	2.1687	16.7754	0.143343	0.0647981	4.83148	0.0279446	1.5537
rs2150089	16770181	G	A	0.0693724	0.0725709	0.791121	40424	0	0.0669	0.0357	3.52	0.0606	1.21753	16.7702	0.0844287	0.0382671	4.82739	0.028011	1.55267
rs141702448	16917134	C	T	0.0246705	0.0237201	0.84166	40424	0	-0.047	0.0589	0.637	0.425	0.371611	16.9171	0.141557	0.0639487	4.82331	0.0280774	1.55164
rs1856132	16730653	A	G	0.06795	0.0710989	0.729879	40424	0	0.0576	0.0372	2.39	0.122	0.91364	16.7307	0.0885303	0.0402535	4.79473	0.0285469	1.54444
rs4961729	16676601	A	G	0.232983	0.243225	0.706091	40424	0	0.0382	0.0231	2.74	0.0978	1.00966	16.6766	0.0534627	0.0243918	4.79008	0.0286241	1.54327
rs12551733	16895578	C	G	0.280812	0.256466	0.992759	40424	1	-0.154	0.0198	60.2	8.76e-15	14.0575	16.8956	-0.049345	0.022571	4.78894	0.028643	1.54298
rs79857260	16485362	T	G	0.0570771	0.0595199	0.861559	40424	0	0.0707	0.0391	3.27	0.0707	1.15058	16.4854	0.0890313	0.0405163	4.78475	0.0287128	1.54192
rs10962569	16759197	C	G	0.0683882	0.0715679	0.715824	40424	0	0.0581	0.0365	2.53	0.112	0.950782	16.7592	0.0884573	0.0404449	4.74281	0.029421	1.53134
rs7046154	16664759	A	G	0.645124	0.627846	0.80695	40424	0	-0.0567	0.0195	8.42	0.0037	2.4318	16.6648	-0.043906	0.020166	4.73421	0.0295684	1.52917
rs1999214	16740141	T	C	0.0700229	0.0735183	0.729451	40424	0	0.0534	0.0363	2.16	0.142	0.847712	16.7401	0.0865499	0.0396166	4.73247	0.0295983	1.52873
rs200406339	16851324	AGTG	A	0.0144067	0.0122008	0.200378	40424	0	-0.852125	0.187898	22.1012	2.59e-06	5.58729	16.8513	-0.400541	0.187169	4.72623	0.0297059	1.52716
rs10733312	16589140	G	A	0.931355	0.932554	0.47333	40424	0	0.072	0.0455	2.5	0.114	0.943095	16.5891	0.111472	0.0516701	4.70899	0.0300053	1.5228
rs10756810	16759936	C	T	0.0705421	0.0736089	0.735182	40424	0	0.0661	0.0356	3.46	0.063	1.20066	16.7599	0.085737	0.0393981	4.69683	0.0302183	1.51973
rs12378588	16788274	A	G	0.0823966	0.0861622	0.726993	40424	0	0.0593	0.0345	2.96	0.0856	1.06753	16.7883	0.0801008	0.0368442	4.6909	0.0303228	1.51823
rs10810615	16759746	G	C	0.0693011	0.0722574	0.734192	40424	0	0.0727	0.0355	4.2	0.0404	1.39362	16.7598	0.086411	0.039751	4.6863	0.0304041	1.51707
rs79575950	16483455	A	G	0.055871	0.0581498	0.884231	40424	0	0.0743	0.0391	3.61	0.0573	1.24185	16.4835	0.0877814	0.0404031	4.67759	0.0305586	1.51487
rs74645810	16788333	T	C	0.538435	0.525806	0.538817	40424	0	-0.0665	0.0243	7.46	0.00631	2.19997	16.7883	-0.0521877	0.0241948	4.65046	0.0310452	1.50801
rs35066453	16848716	A	G	0.0717789	0.0681432	0.987715	40424	1	-0.0734	0.0345	4.52	0.0335	1.47496	16.8487	0.0799512	0.0369606	4.6468	0.0311115	1.50708
rs1538591	16943514	C	T	0.163429	0.149875	0.973798	40424	0	-0.119	0.0243	23.9	1.02e-06	5.9914	16.9435	-0.0539069	0.0251008	4.63428	0.0313393	1.50391
rs79721685	16651286	A	T	0.0192034	0.0208977	0.530204	40424	0	0.14	0.0713	3.87	0.0491	1.30892	16.6513	0.184341	0.0850583	4.61615	0.0316723	1.49932
rs10962530	16667568	T	C	0.620475	0.603244	0.868101	40424	0	-0.0483	0.0188	6.56	0.0104	1.98297	16.6676	-0.0411741	0.0191741	4.6062	0.0318565	1.4968
rs139736769	16781459	G	A	0.0696291	0.0726713	0.790825	40424	0	0.0673	0.0357	3.55	0.0596	1.22475	16.7815	0.0822957	0.0381994	4.60397	0.031898	1.49624
rs10810600	16734676	T	C	0.0669714	0.0701465	0.722577	40424	0	0.0555	0.0372	2.22	0.136	0.866461	16.7347	0.0876381	0.0406827	4.6008	0.031957	1.49543
rs77122352	16646578	C	G	0.0192112	0.0208995	0.531328	40424	0	0.141	0.0712	3.9	0.0483	1.31605	16.6466	0.183713	0.0849652	4.59499	0.0320655	1.49396
rs79556229	16482641	G	A	0.0539227	0.056231	0.903644	40424	0	0.075	0.0393	3.65	0.056	1.25181	16.4826	0.0873945	0.040587	4.59442	0.0320762	1.49382
rs12375569	16805155	A	G	0.753834	0.740395	0.931352	40424	0	-0.052	0.0206	6.37	0.0116	1.93554	16.8052	-0.0446433	0.0208541	4.57118	0.0325142	1.48793
rs10756788	16718436	A	G	0.634579	0.620321	0.792516	40424	0	-0.0503	0.0198	6.47	0.011	1.95861	16.7184	-0.0429785	0.0201109	4.5617	0.0326946	1.48552
rs7860932	16786898	G	A	0.908493	0.902786	0.768878	40424	0	-0.109	0.0314	12	0.000531	3.2749	16.7869	-0.073297	0.0342085	4.56082	0.0327114	1.4853
rs10756789	16720122	A	G	0.634582	0.620327	0.792558	40424	0	-0.0503	0.0198	6.46	0.011	1.95861	16.7201	-0.0429717	0.0201101	4.56064	0.0327148	1.48525
rs10756790	16720198	C	G	0.634582	0.620327	0.792558	40424	0	-0.0503	0.0198	6.46	0.011	1.95861	16.7202	-0.0429712	0.02011	4.56054	0.0327168	1.48523
rs3927536	16787670	C	T	0.765726	0.75113	0.887875	40424	0	-0.0742	0.0211	12.4	0.000423	3.37366	16.7877	-0.0462905	0.0216659	4.55191	0.032882	1.48304
rs10962548	16714414	G	A	0.631859	0.61791	0.786797	40424	0	-0.0499	0.0198	6.35	0.0118	1.92812	16.7144	-0.0429832	0.0201599	4.54067	0.0330986	1.48019
rs7030387	16590711	G	A	0.916317	0.91741	0.440821	40424	0	0.0497	0.0423	1.38	0.24	0.619789	16.5907	0.103383	0.0487847	4.53818	0.0331468	1.47956
rs10962556	16736003	G	A	0.0660418	0.0691387	0.722556	40424	0	0.0587	0.0372	2.49	0.114	0.943095	16.736	0.0875591	0.0409346	4.53623	0.0331846	1.47906
rs10481558	16715657	C	T	0.634371	0.620091	0.792513	40424	0	-0.0504	0.0198	6.49	0.0109	1.96257	16.7157	-0.0428734	0.0201182	4.53615	0.0331862	1.47904
rs74602641	16430010	C	T	0.021521	0.0223278	0.314706	40424	0	0.0172	0.0788	0.0477	0.827	0.0824945	16.43	0.224154	0.10454	4.53222	0.0332624	1.47805
rs76679110	17113797	A	C	0.0100744	0.0120882	0.713096	40424	0	0.1	0.101	0.992	0.319	0.496209	17.1138	0.20749	0.0966855	4.51243	0.0336494	1.47302
rs7865762	16805332	G	T	0.246587	0.260108	0.929003	40424	0	0.0544	0.0214	6.48	0.0109	1.96257	16.8053	0.044326	0.0208628	4.50275	0.0338404	1.47056
rs7019530	16936082	G	A	0.831534	0.845408	0.992527	40424	1	0.116	0.024	23.4	1.31e-06	5.88273	16.9361	0.0518814	0.0245691	4.47911	0.0343116	1.46456
rs77148138	17204514	G	C	0.0196668	0.0211965	0.353829	40424	0	0.189	0.0891	4.48	0.0342	1.46597	17.2045	0.220657	0.103498	4.47196	0.0344554	1.46274
rs114425667	16554076	C	T	0.020694	0.0222687	0.546266	40424	0	0.108	0.0694	2.4	0.121	0.917215	16.5541	0.172883	0.0811547	4.46444	0.0346074	1.46083
rs117329371	16470735	T	A	0.0224284	0.0229714	0.294954	40424	0	0.0284	0.0806	0.124	0.725	0.139662	16.4707	0.226387	0.106458	4.45897	0.0347184	1.45944
rs10756800	16739894	C	T	0.602766	0.590206	0.713566	40424	0	-0.0495	0.0202	6.01	0.0142	1.84771	16.7399	-0.0442416	0.0209586	4.45131	0.0348745	1.45749
rs10756799	16739893	G	T	0.602766	0.590206	0.713566	40424	0	-0.0491	0.0202	5.92	0.015	1.82391	16.7399	-0.0442415	0.0209586	4.4513	0.0348747	1.45749
rs10962560	16744121	C	G	0.609046	0.596589	0.725167	40424	0	-0.0516	0.0201	6.58	0.0103	1.98716	16.7441	-0.0439784	0.0208483	4.44501	0.0350034	1.45589
rs1415476	16587648	C	T	0.932955	0.934104	0.482544	40424	0	0.0708	0.0457	2.4	0.121	0.917215	16.5877	0.108371	0.0517152	4.44168	0.0350717	1.45504
rs4448381	16802531	T	C	0.755179	0.741984	0.944196	40424	0	-0.0501	0.0205	5.94	0.0148	1.82974	16.8025	-0.0438638	0.0208029	4.43477	0.035214	1.45328
rs1927626	16587758	C	T	0.932963	0.934106	0.482397	40424	0	0.0708	0.0457	2.4	0.121	0.917215	16.5878	0.108135	0.0517243	4.42075	0.0355044	1.44972
rs78186258	16480058	A	G	0.0541527	0.0564214	0.907839	40424	0	0.0772	0.0391	3.89	0.0487	1.31247	16.4801	0.0853404	0.0404143	4.41932	0.0355342	1.44935
rs4455968	16801450	G	T	0.0827261	0.0863263	0.714728	40424	0	0.0523	0.0364	2.06	0.151	0.821023	16.8014	0.0783453	0.0371694	4.41098	0.0357083	1.44723
rs80093082	16482104	G	A	0.0537208	0.0559551	0.908703	40424	0	0.0735	0.0393	3.5	0.0613	1.21254	16.4821	0.0855158	0.0405604	4.40554	0.0358224	1.44585
rs12376135	16794418	C	A	0.0822246	0.0856748	0.743764	40424	0	0.0577	0.0336	2.95	0.0857	1.06702	16.7944	0.0768774	0.0365264	4.3981	0.035979	1.44395
rs201402022	16993944	T	TTTCC	0.0647067	0.0538547	0.735772	40424	0	-0.20851	0.0441141	22.8788	1.73e-06	5.7631	16.9939	-0.0945376	0.0453012	4.39704	0.0360014	1.44368
rs4961503	16902524	G	A	0.278058	0.253891	0.976907	40424	0	-0.155	0.0199	60.7	6.74e-15	14.1713	16.9025	-0.0476998	0.0227718	4.39621	0.0360189	1.44347
rs75179897	16481630	C	T	0.0537026	0.0559378	0.91017	40424	0	0.0736	0.0393	3.51	0.0609	1.21538	16.4816	0.0852522	0.0405337	4.38427	0.036272	1.44043
rs10116469	16783095	A	T	0.0804234	0.0841241	0.753537	40424	0	0.0455	0.036	1.6	0.206	0.686133	16.7831	0.0768681	0.0365961	4.38011	0.0363607	1.43937
rs10756763	16587490	C	T	0.918732	0.919849	0.447079	40424	0	0.0512	0.0423	1.46	0.226	0.645891	16.5875	0.102042	0.0490969	4.36502	0.0366841	1.43552
rs10122189	16777696	C	A	0.0682959	0.0712001	0.797135	40424	0	0.0676	0.0358	3.57	0.0587	1.23136	16.7777	0.0805461	0.0384018	4.36434	0.0366987	1.43535
rs10810614	16759311	T	G	0.0713248	0.0746279	0.701319	40424	0	0.0542	0.0362	2.24	0.134	0.872895	16.7593	0.0840626	0.0400796	4.36401	0.0367058	1.43527
rs10962747	16942642	A	T	0.332388	0.311127	0.999024	40424	1	-0.0905	0.0188	23.1	1.53e-06	5.81531	16.9426	-0.0403256	0.019329	4.36043	0.036783	1.43435
rs10810622	16778858	A	G	0.0690635	0.0720349	0.796143	40424	0	0.0652	0.0356	3.36	0.067	1.17393	16.7789	0.0801224	0.0382534	4.35231	0.0369588	1.43228
rs7350234	16586132	C	T	0.933627	0.934837	0.487047	40424	0	0.0711	0.0457	2.42	0.12	0.920819	16.5861	0.107281	0.051734	4.34939	0.0370222	1.43154
rs11790330	16943861	G	A	0.332249	0.311082	0.991853	40424	0	-0.09	0.0188	22.8	1.78e-06	5.74958	16.9439	-0.0402192	0.0193285	4.33766	0.0372781	1.42855
rs11792883	16944034	T	C	0.332119	0.310988	0.99891	40424	1	-0.0902	0.0188	22.9	1.69e-06	5.77211	16.944	-0.0402233	0.0193308	4.33754	0.0372807	1.42851
rs10962755	16944968	C	T	0.332197	0.311044	0.990719	40424	0	-0.0902	0.0188	22.9	1.69e-06	5.77211	16.945	-0.0402138	0.0193274	4.337	0.0372926	1.42838
rs7038494	16854075	T	C	0.0703576	0.0663526	0.97199	40424	0	-0.0807	0.0349	5.35	0.0207	1.68403	16.8541	0.0783601	0.0375137	4.33327	0.0373744	1.42743
rs1927617	16572642	C	T	0.0750432	0.0745279	0.453251	40424	0	-0.0647	0.0427	2.3	0.129	0.88941	16.5726	-0.104529	0.0506133	4.31139	0.037858	1.42184
rs13291000	16855490	G	A	0.0703312	0.0662712	0.991203	40424	1	-0.0779	0.0349	4.98	0.0256	1.59176	16.8555	0.0778252	0.0373549	4.31073	0.0378727	1.42167
rs7031867	16856867	A	T	0.0718124	0.0679561	0.991094	40424	1	-0.0796	0.0345	5.34	0.0209	1.67985	16.8569	0.0770878	0.0370063	4.31029	0.0378825	1.42156
rs1337400	16588193	C	T	0.933029	0.934103	0.481467	40424	0	0.0696	0.0457	2.32	0.128	0.89279	16.5882	0.106875	0.0517688	4.31018	0.0378849	1.42153
rs78117593	16631262	C	G	0.0201235	0.0217533	0.556015	40424	0	0.117	0.0699	2.79	0.095	1.02228	16.6313	0.170409	0.0814399	4.30739	0.0379471	1.42082
rs10123118	16778780	G	A	0.0682151	0.0710759	0.805244	40424	0	0.0665	0.0357	3.47	0.0623	1.20551	16.7788	0.0797376	0.0382826	4.304	0.0380228	1.41996
rs10122736	16783482	C	T	0.0801729	0.0838474	0.754536	40424	0	0.0454	0.0361	1.58	0.208	0.681937	16.7835	0.0762502	0.0366257	4.30321	0.0380405	1.41975
rs78077756	16441931	C	T	0.0481794	0.0506224	0.886823	40424	0	0.0951	0.0415	5.26	0.0219	1.65956	16.4419	0.0894725	0.0429341	4.30189	0.03807	1.41942
rs9696534	16907801	G	A	0.0444955	0.0449019	0.350806	40424	0	0.0836	0.0248	11.3	0.00076	3.11919	16.9078	-0.153357	0.0744378	4.29564	0.0382102	1.41782
rs77257470	16479560	C	T	0.0537294	0.0559898	0.91364	40424	0	0.0731	0.0392	3.48	0.0622	1.20621	16.4796	0.0841108	0.0404369	4.28855	0.0383699	1.41601
rs115592788	16553972	G	C	0.0210666	0.0226613	0.564207	40424	0	0.108	0.0694	2.4	0.121	0.917215	16.554	0.164906	0.0791828	4.26845	0.0388263	1.41087
rs28704646	16480626	G	C	0.0546123	0.0569032	0.921806	40424	0	0.0697	0.0454	2.36	0.125	0.90309	16.4806	0.0828939	0.0399498	4.26798	0.0388371	1.41075
rs28701032	16480565	C	T	0.0546123	0.0569053	0.922017	40424	0	0.0699	0.0387	3.26	0.0708	1.14997	16.4806	0.0828689	0.0399448	4.2665	0.0388709	1.41037
rs28523679	16480476	C	T	0.0546125	0.0569079	0.922334	40424	0	0.0702	0.0387	3.29	0.0698	1.15614	16.4805	0.0828177	0.0399372	4.26287	0.0389541	1.40945
rs13297036	16900573	T	C	0.451531	0.469116	0.479091	40424	0	0.0799	0.0229	12.1	0.000492	3.30803	16.9006	0.0565548	0.0273884	4.25978	0.039025	1.40866
rs13296061	16900577	G	A	0.451532	0.469116	0.479087	40424	0	0.106	0.0225	22.2	2.49e-06	5.6038	16.9006	0.0565476	0.0273886	4.25863	0.0390514	1.40836
rs200468715	16476564	TTTA	T	0.0522023	0.0546652	0.616993	40424	0	0.115751	0.0495571	5.40259	0.0201069	1.69666	16.4766	0.102703	0.0496511	4.2419	0.039438	1.40409
rs187752365	16957175	G	T	0.0117531	0.012011	0.664457	40424	0	-0.0165	0.0929	0.0314	0.859	0.0660068	16.9572	0.20932	0.100595	4.23885	0.0395089	1.40331
rs2149159	16576389	G	T	0.937948	0.939545	0.509024	40424	0	0.0909	0.0468	3.76	0.0524	1.28067	16.5764	0.107148	0.0523468	4.23861	0.0395145	1.40324
rs1330303	16715826	T	C	0.639408	0.625747	0.783091	40424	0	-0.0505	0.0199	6.45	0.0111	1.95468	16.7158	-0.0418776	0.0203465	4.2313	0.039685	1.40137
rs11523045	17259413	G	A	0.0191701	0.0187749	0.258324	40424	0	-0.0928	0.0452	4.22	0.04	1.39794	17.2594	-0.260462	0.127865	4.23012	0.0397126	1.40107
rs11523044	17259412	C	A	0.0191701	0.0187749	0.258324	40424	0	-0.0553	0.0532	1.08	0.299	0.524329	17.2594	-0.260462	0.127865	4.23012	0.0397126	1.40107
rs10733311	16575478	C	T	0.93021	0.931382	0.475965	40424	0	0.0623	0.0447	1.94	0.163	0.787812	16.5755	0.104535	0.0511333	4.22559	0.0398188	1.39991
rs10962592	16787039	G	A	0.0706831	0.0735057	0.772461	40424	0	0.0489	0.0379	1.66	0.197	0.705534	16.787	0.0794634	0.0385129	4.22453	0.0398436	1.39964
rs10810607	16755039	C	G	0.667985	0.65348	0.834981	40424	0	-0.0601	0.0198	9.24	0.00236	2.62709	16.755	-0.0412508	0.0200877	4.2107	0.0401698	1.3961
rs10122827	16774627	T	C	0.0727496	0.0759359	0.773585	40424	0	0.0646	0.0352	3.38	0.0661	1.1798	16.7746	0.077843	0.0377923	4.21043	0.0401761	1.39603
rs5016916	16751917	C	A	0.220406	0.231482	0.825021	40424	0	0.0494	0.0224	4.87	0.0273	1.56384	16.7519	0.0471598	0.0229557	4.20788	0.0402366	1.39538
rs10962488	16565623	C	T	0.0836441	0.0826443	0.449943	40424	0	-0.052	0.041	1.61	0.205	0.688246	16.5656	-0.0985257	0.0483197	4.19952	0.0404354	1.39324
rs28584140	16786756	G	A	0.0706117	0.0733838	0.772047	40424	0	0.0496	0.0379	1.71	0.191	0.718967	16.7868	0.0792576	0.0385476	4.19516	0.0405395	1.39212
rs10122901	16808172	C	G	0.0896255	0.0939192	0.701111	40424	0	0.0553	0.0337	2.69	0.101	0.995679	16.8082	0.0739837	0.0360203	4.19059	0.040649	1.39095
rs12351269	16806521	T	C	0.0889439	0.0934097	0.718115	40424	0	0.0606	0.0335	3.26	0.0709	1.14935	16.8065	0.0732582	0.0356974	4.18355	0.0408181	1.38915
rs5016911	16751755	G	A	0.221754	0.232916	0.830069	40424	0	0.0497	0.0222	5.01	0.0252	1.5986	16.7518	0.0467499	0.0228279	4.18156	0.0408661	1.38864
rs7048399	16589226	G	C	0.933847	0.934912	0.484831	40424	0	0.0727	0.0459	2.51	0.113	0.946922	16.5892	0.105457	0.051858	4.18152	0.040867	1.38863
rs10962609	16801120	A	C	0.0820179	0.0854686	0.704657	40424	0	0.0568	0.034	2.79	0.0948	1.02319	16.8011	0.0770665	0.0375849	4.17492	0.0410265	1.38694
rs10810626	16785770	A	T	0.0702939	0.0730177	0.765851	40424	0	0.05	0.0381	1.72	0.19	0.721246	16.7858	0.0794312	0.0387929	4.16052	0.0413767	1.38324
rs13295768	16900567	C	T	0.451081	0.468526	0.480168	40424	0	0.0953	0.0228	17.5	2.85e-05	4.54516	16.9006	0.0557759	0.0273441	4.15678	0.0414682	1.38228
rs78505148	16481722	T	C	0.0579095	0.0599087	0.853826	40424	0	0.077	0.0393	3.84	0.0499	1.3019	16.4817	0.0828862	0.0405185	4.149	0.0416591	1.38029
rs145931335	17046063	A	G	0.0138721	0.0136774	0.400603	40424	0	-0.0942	0.0949	0.985	0.321	0.493495	17.0461	-0.244747	0.121474	4.14262	0.0418164	1.37865
rs10121347	16806694	G	C	0.0884512	0.0928052	0.71957	40424	0	0.0606	0.0336	3.26	0.0712	1.14752	16.8067	0.0728457	0.0357587	4.12247	0.0423173	1.37348
rs10810621	16776500	A	C	0.220985	0.232505	0.869869	40424	0	0.0483	0.0216	4.99	0.0256	1.59176	16.7765	0.0454884	0.0223911	4.11534	0.042496	1.37165
rs1952689	16723226	G	C	0.637069	0.623373	0.790361	40424	0	-0.048	0.0198	5.86	0.0155	1.80967	16.7232	-0.0409558	0.020178	4.115	0.0425045	1.37156
rs141387632	16961305	T	A	0.0144883	0.015064	0.638912	40424	0	-0.00658	0.0815	0.00652	0.936	0.0287242	16.9613	0.186746	0.0913426	4.10443	0.042771	1.36885
rs7022813	16553716	C	G	0.0796569	0.0785702	0.458588	40424	0	-0.0605	0.0419	2.09	0.149	0.826814	16.5537	-0.0985691	0.0489187	4.10166	0.0428411	1.36814
rs2891072	16553933	C	A	0.0796625	0.0785785	0.458696	40424	0	-0.0613	0.0421	2.12	0.145	0.838632	16.5539	-0.0984773	0.0489113	4.09522	0.0430046	1.36648
rs1330298	16755121	A	G	0.228825	0.240098	0.841565	40424	0	0.0513	0.022	5.46	0.0195	1.70996	16.7551	0.0454926	0.0224636	4.08974	0.0431443	1.36508
rs12350853	16554599	C	T	0.0797616	0.0786939	0.45857	40424	0	-0.061	0.0421	2.1	0.147	0.832683	16.5546	-0.0983373	0.0488905	4.08698	0.0432148	1.36437
rs201286020	16961299	T	TTTTTGA	0.0145636	0.0151369	0.635845	40424	0	0.0414086	0.0904677	0.208629	0.647844	0.188529	16.9613	0.186324	0.0913411	4.0862	0.0432347	1.36417
rs10962742	16941297	A	G	0.33252	0.311359	0.998729	40424	1	-0.0889	0.0188	22.3	2.3e-06	5.63827	16.9413	-0.0389926	0.0193221	4.07957	0.0434047	1.36246
rs35889406	16618556	T	C	0.0323081	0.0304056	0.497525	40424	0	-0.0594	0.0612	0.942	0.332	0.478862	16.6186	-0.143447	0.0715775	4.07869	0.0434273	1.36224
rs7024458	16478057	C	A	0.0704893	0.0732328	0.825696	40424	0	0.0707	0.0354	4	0.0455	1.34199	16.4781	0.0758215	0.0374334	4.07179	0.043605	1.36046
rs200214959	16565956	C	CA	0.0839769	0.0830104	0.449125	40424	0	-0.0976529	0.0482397	4.13913	0.0419027	1.37776	16.566	-0.0969064	0.048272	4.06997	0.043652	1.36
rs2039185	16784004	G	C	0.070881	0.0735314	0.757247	40424	0	0.0507	0.0381	1.77	0.184	0.735182	16.784	0.0786555	0.0388588	4.06628	0.0437475	1.35905
rs75995512	16565954	A	AC	0.0841788	0.0832541	0.448736	40424	0	-0.097126	0.0481965	4.10164	0.0428416	1.36813	16.566	-0.096605	0.0482303	4.05151	0.0441319	1.35525
rs1337393	16591308	C	T	0.933536	0.934543	0.482944	40424	0	0.0686	0.0459	2.23	0.135	0.869666	16.5913	0.103687	0.0518232	4.04696	0.044251	1.35408
rs10117448	16571394	G	A	0.0839554	0.0829807	0.451626	40424	0	-0.0627	0.0408	2.36	0.125	0.90309	16.5714	-0.0962551	0.0481414	4.03702	0.0445124	1.35152
rs7048397	16914703	T	C	0.317196	0.273717	0.982609	40424	0	-0.234	0.02	137	1.43e-31	30.8447	16.9147	0.584639	0.299506	4.02956	0.0447096	1.3496
rs73410488	16787767	T	C	0.0745425	0.0773083	0.731244	40424	0	0.0453	0.0376	1.45	0.228	0.642065	16.7878	0.0777373	0.0386536	4.01459	0.0451082	1.34574
rs943745	16564112	A	G	0.0846218	0.0836738	0.447479	40424	0	-0.0493	0.041	1.45	0.228	0.642065	16.5641	-0.0960849	0.0481922	4.01403	0.0451232	1.3456
rs2382810	16554165	C	T	0.0832042	0.0822562	0.450898	40424	0	-0.0492	0.0412	1.42	0.233	0.632644	16.5542	-0.0960261	0.0483535	3.98249	0.0459756	1.33747
rs185618353	16907974	T	C	0.0268332	0.0256761	0.774168	40424	0	-0.0999	0.0633	2.49	0.115	0.939302	16.908	0.129357	0.064441	3.98054	0.0460288	1.33697
rs2382808	16553888	T	A	0.083201	0.0822544	0.450847	40424	0	-0.0491	0.0412	1.42	0.233	0.632644	16.5539	-0.0959934	0.048356	3.97934	0.0460616	1.33666
rs6475059	16554405	G	A	0.0832083	0.0822639	0.450982	40424	0	-0.0491	0.0412	1.42	0.233	0.632644	16.5544	-0.0959575	0.0483462	3.97797	0.0460991	1.33631
rs10962679	16905441	T	C	0.74665	0.784496	0.977593	40424	0	0.231	0.021	122	2.5e-28	27.6021	16.9054	0.0735474	0.0368174	3.9725	0.0462491	1.3349
rs2382804	16454235	T	C	0.993826	0.99449	0.32041	40424	0	0.249	0.145	2.96	0.0851	1.07007	16.4542	0.411036	0.210666	3.95986	0.0465976	1.33164
rs7865933	16951205	C	A	0.403955	0.385927	0.980734	40424	0	-0.0894	0.0181	24.5	7.3e-07	6.13668	16.9512	-0.0369184	0.0185627	3.95955	0.0466062	1.33156
rs111417603	16574694	TATC	T	0.0649046	0.0636895	0.486398	40424	0	-0.088792	0.0522499	2.91561	0.0877262	1.05687	16.5747	-0.103567	0.0523578	3.95639	0.0466937	1.33074
rs12338548	16564464	C	T	0.0834988	0.0825478	0.450868	40424	0	-0.0506	0.0411	1.51	0.218	0.661543	16.5645	-0.0955416	0.0482967	3.95155	0.0468282	1.32949
rs10962588	16782535	T	C	0.0723106	0.07518	0.779362	40424	0	0.061	0.0354	2.97	0.0849	1.07109	16.7825	0.0755064	0.0378819	3.94379	0.0470447	1.32749
rs202052962	16476565	TTA	T	0.0532451	0.055655	0.607107	40424	0	0.112266	0.0494842	5.09844	0.0239474	1.62074	16.4766	0.0988495	0.0495796	3.94204	0.0470936	1.32704
rs2382809	16554116	A	T	0.0829235	0.0819956	0.451191	40424	0	-0.0483	0.0412	1.37	0.241	0.617983	16.5541	-0.0955887	0.0484077	3.9373	0.0472265	1.32581
rs1927616	16563321	G	A	0.0834606	0.0825183	0.450686	40424	0	-0.052	0.0412	1.6	0.206	0.686133	16.5633	-0.0953656	0.0483106	3.93465	0.047301	1.32513
rs7858025	16560854	A	T	0.0843574	0.0832614	0.447431	40424	0	-0.0504	0.0411	1.5	0.22	0.657577	16.5608	-0.0952367	0.0482722	3.93008	0.0474297	1.32395
rs13296274	16729959	C	A	0.638796	0.624941	0.810133	40424	0	-0.0485	0.0197	6.07	0.0137	1.86328	16.73	-0.0396585	0.0199948	3.92947	0.0474469	1.32379
rs7046884	16476144	G	A	0.071432	0.0741401	0.83644	40424	0	0.0691	0.0351	3.88	0.0489	1.31069	16.4761	0.0735965	0.0369948	3.9284	0.0474771	1.32352
rs10962554	16729697	G	C	0.638949	0.625053	0.811784	40424	0	-0.0495	0.0197	6.33	0.0118	1.92812	16.7297	-0.0396064	0.0199727	3.92786	0.0474923	1.32338
rs10738437	16581967	G	A	0.930324	0.931356	0.483286	40424	0	0.0678	0.0451	2.26	0.133	0.876148	16.582	0.100116	0.0507996	3.92519	0.0475678	1.32269
rs7021199	16556594	T	C	0.0846377	0.0835978	0.446306	40424	0	-0.052	0.0411	1.6	0.206	0.686133	16.5566	-0.0948365	0.0482331	3.90317	0.0481951	1.317
c9_pos16974609	16984609	A	G	0.109964	0.093119	0.98472	40424	1	-0.146	0.0297	24.1	8.94e-07	6.04866	16.9846	-0.0600305	0.0305078	3.89634	0.0483914	1.31523
rs10756796	16730974	A	G	0.63909	0.625214	0.811957	40424	0	-0.0494	0.0197	6.32	0.0119	1.92445	16.731	-0.0394375	0.0199746	3.8937	0.0484675	1.31455
rs943744	16563907	A	T	0.0839331	0.0830342	0.449101	40424	0	-0.0461	0.0411	1.26	0.262	0.581699	16.5639	-0.0947555	0.0482685	3.89096	0.0485467	1.31384
rs11792459	16943924	T	G	0.265459	0.247729	0.805994	40424	0	-0.101	0.0199	25.9	3.67e-07	6.43533	16.9439	-0.045378	0.0230546	3.88259	0.0487892	1.31168
rs28593297	16558861	A	G	0.0837886	0.0829114	0.449509	40424	0	-0.0533	0.0417	1.63	0.201	0.696804	16.5589	-0.0946278	0.0482563	3.88232	0.0487971	1.31161
rs6475060	16557748	C	T	0.0843027	0.083433	0.447682	40424	0	-0.0521	0.0411	1.61	0.205	0.688246	16.5577	-0.0945163	0.0482206	3.87879	0.0488998	1.31069
rs1538589	16942901	C	T	0.393822	0.37656	0.999996	40424	1	-0.0851	0.0181	22.2	2.49e-06	5.6038	16.9429	-0.0364108	0.0185415	3.86038	0.0494391	1.30593
rs28414647	16556852	A	C	0.0857407	0.0847767	0.442279	40424	0	-0.0478	0.0411	1.35	0.245	0.610834	16.5569	-0.0941569	0.0481708	3.85699	0.0495391	1.30505
rs10810604	16744807	T	C	0.64467	0.631196	0.807117	40424	0	-0.0484	0.0197	6	0.0143	1.84466	16.7448	-0.0395368	0.0201247	3.8549	0.0496009	1.30451
chr916890708	16890709	TA	T	0.0174125	0.0160388	0.637069	40424	0	-0.0981408	0.0864465	1.30244	0.253768	0.595563	16.8907	0.176021	0.0889191	3.8531	0.0496541	1.30404
rs10962781	16975258	A	G	0.0988798	0.0825871	0.99879	28728	1	-0.165	0.0365	20.5	5.91e-06	5.22841	16.9753	-0.0735661	0.0376303	3.85138	0.0497051	1.3036
rs2183405	16661933	G	A	0.323674	0.336036	0.829822	40424	0	0.0247	0.0197	1.58	0.209	0.679854	16.6619	0.0401082	0.0204306	3.84809	0.0498027	1.30275
rs10962447	16486758	C	A	0.0507483	0.0486107	0.454101	40424	0	-0.147	0.0516	8.08	0.00448	2.34872	16.4868	-0.118985	0.0610488	3.84424	0.0499171	1.30175
rs10962545	16701680	C	A	0.070169	0.0736131	0.616186	40424	0	0.0946	0.0384	6.07	0.0137	1.86328	16.7017	0.0849018	0.0431526	3.83987	0.0500474	1.30062
rs7861345	16559216	T	C	0.0837311	0.0828712	0.44961	40424	0	-0.051	0.0412	1.53	0.215	0.667562	16.5592	-0.0941083	0.0482616	3.83876	0.0500805	1.30033
rs1415473	16594682	T	C	0.0696849	0.0691529	0.445678	40424	0	-0.035	0.0448	0.61	0.435	0.361511	16.5947	-0.10238	0.0527179	3.81093	0.0509192	1.29312
rs1807023	16555289	G	A	0.0838136	0.0827894	0.448821	40424	0	-0.0458	0.041	1.25	0.264	0.578396	16.5553	-0.093866	0.0483116	3.81092	0.0509195	1.29312
rs263546	17026724	G	A	0.0783919	0.0831575	0.950404	40424	0	0.0391	0.0322	1.48	0.224	0.649752	17.0267	0.0639857	0.0326842	3.8073	0.0510296	1.29218
rs10962504	16598985	G	C	0.0459871	0.0484314	0.448766	40424	0	0.049	0.0517	0.9	0.343	0.464706	16.599	0.120153	0.0613047	3.79841	0.0513013	1.28987
rs80144700	16670381	T	C	0.0161154	0.0149143	0.203937	40424	0	-0.233	0.0982	5.62	0.0178	1.74958	16.6704	-0.306749	0.159115	3.79695	0.051346	1.28949
rs263545	17026601	A	G	0.0784856	0.0832574	0.949076	40424	0	0.0385	0.0322	1.43	0.232	0.634512	17.0266	0.0638887	0.0326802	3.79674	0.0513525	1.28944
rs56170891	16556532	C	T	0.0810277	0.0799179	0.453711	40424	0	-0.0585	0.0419	1.95	0.163	0.787812	16.5565	-0.0946066	0.0487913	3.79649	0.0513601	1.28937
rs10122934	16477357	C	T	0.0720015	0.0747466	0.837425	40424	0	0.0652	0.0349	3.48	0.062	1.20761	16.4774	0.0719074	0.0367932	3.79198	0.0514987	1.2882
rs13297677	16777067	T	G	0.21645	0.227677	0.882757	40424	0	0.0473	0.0218	4.72	0.0299	1.52433	16.7771	0.0436424	0.0223809	3.7918	0.0515042	1.28816
rs11788776	16810347	C	T	0.540731	0.532325	0.613826	40424	0	-0.0382	0.021	3.3	0.0692	1.15989	16.8103	-0.0439004	0.0225527	3.78806	0.0516194	1.28719
rs1952345	16568524	C	A	0.0743028	0.0736779	0.450874	40424	0	-0.0551	0.0435	1.6	0.205	0.688246	16.5685	-0.0985682	0.0509519	3.78032	0.0518587	1.28518
rs10962522	16657540	G	C	0.0421437	0.0447725	0.428517	40424	0	0.0463	0.0546	0.72	0.396	0.402305	16.6575	0.127595	0.0652429	3.78001	0.0518683	1.2851
rs12340504	16578039	A	T	0.0628438	0.0616108	0.495257	40424	0	-0.0748	0.0467	2.56	0.109	0.962573	16.578	-0.10176	0.0526696	3.77404	0.0520538	1.28355
c9_pos16941373	16951373	G	C	0.401175	0.383459	0.996621	40424	1	-0.0854	0.018	22.5	2.14e-06	5.66959	16.9514	-0.0358489	0.0185122	3.75377	0.0526885	1.27828
rs148389821	16967365	C	T	0.0110555	0.0119429	0.800595	40424	0	0.18	0.0821	4.81	0.0283	1.54821	16.9674	0.178749	0.0917129	3.72809	0.0535045	1.27161
rs7859971	16573047	G	A	0.0646532	0.0635345	0.488511	40424	0	-0.0764	0.0462	2.74	0.0981	1.00833	16.573	-0.100391	0.0523012	3.72422	0.0536287	1.2706
rs75214735	16555833	C	CA	0.0844913	0.0834877	0.446703	40424	0	-0.0973557	0.0482328	4.1148	0.0425096	1.37151	16.5558	-0.0926192	0.0482413	3.72066	0.0537431	1.26968
rs28714603	16555980	A	G	0.0844923	0.0834889	0.446715	40424	0	-0.0495	0.041	1.46	0.227	0.643974	16.556	-0.092602	0.0482405	3.71941	0.0537834	1.26935
rs10810598	16733799	T	A	0.638413	0.62466	0.811995	40424	0	-0.0491	0.0196	6.24	0.0125	1.90309	16.7338	-0.0385277	0.0199679	3.71872	0.0538056	1.26917
rs28483319	16556051	G	A	0.0844924	0.0834896	0.446719	40424	0	-0.0496	0.041	1.46	0.227	0.643974	16.556	-0.0925863	0.0482402	3.71818	0.053823	1.26903
rs28602416	16556191	T	G	0.0844931	0.0834908	0.446728	40424	0	-0.0495	0.041	1.46	0.227	0.643974	16.5562	-0.0925605	0.0482395	3.71622	0.0538862	1.26852
rs78974792	16986962	T	C	0.109015	0.0926464	0.939977	40424	0	-0.141	0.0299	22.3	2.39e-06	5.6216	16.987	-0.0597446	0.031143	3.70319	0.0543085	1.26513
rs17744040	16842137	T	C	0.123742	0.108655	0.936366	40424	1	-0.175	0.0282	38.4	5.87e-10	9.23136	16.8421	-0.0584841	0.0304761	3.70049	0.0543965	1.26443
rs7853096	16742058	C	T	0.105631	0.11074	0.741411	40424	0	0.0351	0.0305	1.33	0.25	0.60206	16.7421	0.0627632	0.0325467	3.69867	0.0544559	1.26395
rs1415474	16594680	C	T	0.0649066	0.0643062	0.464451	40424	0	-0.0506	0.046	1.21	0.271	0.567031	16.5947	-0.101789	0.0533571	3.67757	0.0551492	1.25846
rs190321642	16907623	T	A	0.0244161	0.0249868	0.335237	40424	0	-0.116	0.0553	4.44	0.0352	1.45346	16.9076	0.187014	0.0969181	3.6726	0.0553138	1.25717
rs16934745	16490828	A	T	0.0366077	0.0342028	0.465487	40424	0	-0.151	0.0586	6.64	0.00998	2.00087	16.4908	-0.135811	0.0714293	3.66887	0.0554378	1.25619
rs1952346	16568780	G	A	0.0767928	0.0763607	0.441616	40424	0	-0.0632	0.0427	2.19	0.138	0.860121	16.5688	-0.096176	0.0506535	3.64038	0.0563941	1.24877
rs140417106	16574093	CTCCTAG	C	0.0595411	0.0581992	0.518426	40424	0	-0.0805889	0.0526395	2.36448	0.124125	0.90614	16.5741	-0.100128	0.0527894	3.63689	0.0565124	1.24786
rs10962559	16743408	A	T	0.644094	0.630783	0.806464	40424	0	-0.0483	0.0198	5.96	0.0146	1.83565	16.7434	-0.0383962	0.0201246	3.63586	0.0565474	1.24759
rs201745812	16871042	GT	G	0.0187613	0.0142871	0.517772	40424	0	-0.516503	0.101541	27.4914	1.58e-07	6.80191	16.871	-0.195549	0.104127	3.59964	0.0577921	1.23813
[truncated: 3,678 more rows]
